# Supplementary material for: Evolution and genomic signatures of spontaneous somatic mutation in Drosophila intestinal stem cells
Source: HighWire-hosted journal article supplement (doi:10.1101/gr.268441.120), 2021-06-24
Supplement: Supplemental_table_S2.xlsx [file Supplemental_table_S2.xlsx]

## Sheet: Sheet 1
Supplemental Table S2		Structural variants excluded from analysis after being manually identified as likely false positives
		SV events excluded from further analysis listed by sample, caller, and genomic position.
sample	source	type	chromosome1	bp1	chromosome2	bp2	split_reads	disc_reads	genotype	length.Kb.	position	allele_frequency	log2.cnv.	microhomology	inserted_seq	consensus	mechanism	bp1_locus	bp2_locus	affected_genes
P17	Control-Freec	DEL	2L	200100	2L	203725	-	-	somatic_tumour	3.6	2L:200100-203725	0.46	-1.57	-	-	-	-	spen, intron	intergenic	spen
P17	Control-Freec	DUP	2L	7016550	2L	7018725	-	-	somatic_tumour	2.2	2L:7016550-7018725	0.47	0.65	-	-	-	-	ade3, exon_6	ade3, exon_3	ade3
P17	Control-Freec	DUP	2R	7930775	2R	7936575	-	-	somatic_tumour	5.8	2R:7930775-7936575	0.39	0.56	-	-	-	-	CG30381, exon_2	drosha, exon	CG30381, rnh1, drosha
P17	Control-Freec	DUP	3L	8587625	3L	8597050	-	-	somatic_tumour	9.4	3L:8587625-8597050	0.36	0.52	-	-	-	-	CG43078, 5UTR	CG43078, exon	CG43078
P17	Control-Freec	DUP	3L	19301675	3L	19311825	-	-	somatic_tumour	10.2	3L:19301675-19311825	0.29	0.42	-	-	-	-	pip, exon	pip, exon_4	pip
P17	Control-Freec	DUP	3R	3171150	3R	3193625	-	-	somatic_tumour	22.5	3R:3171150-3193625	0.45	0.75	-	-	-	-	Pzl, intron	Pzl, intron	Pzl
P17	Control-Freec	DUP	Y	654675	Y	661200	-	-	somatic_tumour	6.5	Y:654675-661200	0.97	0.81	-	-	-	-	kl-2, exon_6	kl-2, exon_8	kl-2
P27	Control-Freec	DUP	3R	21309921	3R	21316206	-	-	somatic_tumour	6.3	3R:21309921-21316206	0.41	0.65	-	-	-	-	Hsromega, exon_2	Hsromega, ncRNA	Hsromega
P27	Control-Freec	DUP	2R	575706	2R	579477	-	-	somatic_tumour	3.8	2R:575706-579477	0.35	0.57	-	-	-	-	CG45781, intron	CG45781, intron	CG45781
P27	Control-Freec	DUP	2R	21763698	2R	21769983	-	-	somatic_tumour	6.3	2R:21763698-21769983	0.34	0.56	-	-	-	-	CR43983, ncRNA	CG30395, exon	CR43983, CG43982, CR43984, CG30395
P27	Control-Freec	DUP	3R	18412536	3R	18421335	-	-	somatic_tumour	8.8	3R:18412536-18421335	0.34	0.6	-	-	-	-	CG31122, intron	fru, 3UTR	CG31122, fru
P27	Control-Freec	DUP	3R	22072920	3R	22079205	-	-	somatic_tumour	6.3	3R:22072920-22079205	0.34	0.54	-	-	-	-	how, intron	how, 3UTR	how
P27	Control-Freec	DUP	3R	25348662	3R	25352433	-	-	somatic_tumour	3.8	3R:25348662-25352433	0.34	0.53	-	-	-	-	Fur1, intron	Fur1, intron	Fur1
P27	Control-Freec	DUP	2L	15932475	2L	15937503	-	-	somatic_tumour	5	2L:15932475-15937503	0.33	0.51	-	-	-	-	beat-Ib, intron	beat-Ib, intron	beat-Ib
P27	Control-Freec	DUP	2L	19171764	2L	19179306	-	-	somatic_tumour	7.5	2L:19171764-19179306	0.33	0.55	-	-	-	-	brat, 3UTR	brat, 3UTR	brat
P27	Control-Freec	DUP	3R	31842324	3R	31851123	-	-	somatic_tumour	8.8	3R:31842324-31851123	0.28	0.41	-	-	-	-	RhoGAP100F, 3UTR	heph, 3UTR	RhoGAP100F, heph
P27	Control-Freec	DUP	3R	26141829	3R	26148114	-	-	somatic_tumour	6.3	3R:26141829-26148114	0.27	0.51	-	-	-	-	intergenic	intergenic	-
P27	Control-Freec	DUP	2R	2952693	2R	2970291	-	-	somatic_tumour	17.6	2R:2952693-2970291	0.17	0.45	-	-	-	-	Scp1, intron	intergenic	Scp1
P27	novobreak	TANDUP	3R	10108183	3R	10108350	6	0	somatic_tumour	0.2	3R:10108183-10108350	0.09	0	-	-	GAACCATCTGCACTTCCGCAGGTCCAACTGGACCTCTTTTCAGTGTGATAACCGAAGTGTTTTTGTCGTGCATCTCGTCTCCTTGGTTTCGGCTACAAACAGCTGCCAGCCGACTTGTGGGTTGTTCTATATAGCCGAGTGTATATGTAGTACATACTACTTCGTTCATAAGACTAATGATTCGAGATCTAACAACCTCGTATACCTGTAATCTATCCGCGAAAATCACTTAACCGCGATATAAGATGGTTTAATCGGATCTTATCTTTATAAATTGCAACGACAAGAAAGGGAAATCATCAAAACAACAAAACCGAATGCACGACCAGAGAACTGCAAGGGTGGCACTTTTTTACCACTCGACTCACACCCTACAATTTTGTGTGCGG	NHEJ	Fmr1, intron	Fmr1, intron	Fmr1
P45a	Control-Freec	DUP	X	9171155	X	9189514	-	-	somatic_tumour	18.4	X:9171155-9189514	0.98	1.13	-	-	-	-	mei-P26, 3UTR	CG12115, exon	mei-P26, CG12115
P45a	Control-Freec	DUP	2L	22750139	2L	22758484	-	-	somatic_tumour	8.3	2L:22750139-22758484	0.5	1.2	-	-	-	-	CG40006, intron	intergenic	CG40006, CR43927
P45a	Control-Freec	DUP	3R	22007434	3R	22014110	-	-	somatic_tumour	6.7	3R:22007434-22014110	0.49	1.11	-	-	-	-	Eip93F, 3UTR	Eip93F, 3UTR	Eip93F
P45a	Control-Freec	DUP	4	685959	4	699311	-	-	somatic_tumour	13.4	4:685959-699311	0.49	0.65	-	-	-	-	CG11360, exon	ey, intron	CG11360, myo, ey
P45a	Control-Freec	DUP	3L	8937495	3L	8942502	-	-	somatic_tumour	5	3L:8937495-8942502	0.48	1.15	-	-	-	-	orb2, 3UTR	orb2, 3UTR	CG43783, orb2
P45a	Control-Freec	DUP	4	126844	4	133520	-	-	somatic_tumour	6.7	4:126844-133520	0.48	0.59	-	-	-	-	Ank, intron	CG32000, intron	Ank, CR43956, CG32000
P45a	Control-Freec	DUP	4	332131	4	343814	-	-	somatic_tumour	11.7	4:332131-343814	0.47	0.81	-	-	-	-	PMCA, intron	PMCA, intron	PMCA
P45a	Control-Freec	DUP	4	1006407	4	1013083	-	-	somatic_tumour	6.7	4:1006407-1013083	0.47	0.84	-	-	-	-	toy, 3UTR	PlexA, exon_10	toy, PlexA
P45a	Control-Freec	DUP	2R	4901853	2R	4918543	-	-	somatic_tumour	16.7	2R:4901853-4918543	0.4	0.61	-	-	-	-	CG44102, exon_4	Ir41a, intron	CG44102, Ir41a
P45a	novobreak	TRA	Tomelloso	80619	3R	31946083	4	0	somatic_tumour	31865.5	Tomelloso:80619 3R:31946083	0.16	0	-	-	GGTTGTCGACAAGTTTAAAAGTTTTCAATATCTCACGTTGTTTGGGTGTCAATTTCATCGAGAGTGGATCCAAATCGGCCACACAATAGCACACATTTGGGGGATGCGAATAGAAATGGTGAGAAACTCTCATTCCCATTCATTAT	-	intergenic	heph, intron	heph
P59	Control-Freec	DUP	3R	21309840	3R	21316640	-	-	somatic_tumour	6.8	3R:21309840-21316640	0.5	1	-	-	-	-	Hsromega, exon_2	Hsromega, ncRNA	Hsromega
P59	Control-Freec	DUP	4	538560	4	545360	-	-	somatic_tumour	6.8	4:538560-545360	0.49	0.74	-	-	-	-	Thd1, 3UTR	Thd1, 3UTR	zfh2, Thd1
P59	Control-Freec	DUP	2R	21765440	2R	21770880	-	-	somatic_tumour	5.4	2R:21765440-21770880	0.47	0.96	-	-	-	-	intergenic	intergenic	CG30395
P59	Control-Freec	DUP	3L	24719360	3L	24737040	-	-	somatic_tumour	17.7	3L:24719360-24737040	0.47	0.88	-	-	-	-	intergenic	scro, intron	scro
P59	Control-Freec	DUP	4	1192720	4	1199520	-	-	somatic_tumour	6.8	4:1192720-1199520	0.47	0.73	-	-	-	-	PIP4K, exon_9	Mitf, intron	CG33521, PIP4K, Mitf
P59	Control-Freec	DUP	2L	19171920	2L	19180080	-	-	somatic_tumour	8.2	2L:19171920-19180080	0.46	0.86	-	-	-	-	brat, 3UTR	CG17568, exon_2	brat, CG17568
P59	Control-Freec	DUP	3L	23324000	3L	23341680	-	-	somatic_tumour	17.7	3L:23324000-23341680	0.46	0.85	-	-	-	-	alpha-Cat, intron	ND-MLRQ, intron	alpha-Cat, mir-4942, ND-MLRQ
P59	Control-Freec	DUP	4	51680	4	114240	-	-	somatic_tumour	62.6	4:51680-114240	0.46	0.47	-	-	-	-	ci, exon_3	pan, 3UTR	ci, CR43957, RpS3A, snoRNA:CD-24, pan
P59	Control-Freec	DUP	3R	15170800	3R	15184400	-	-	somatic_tumour	13.6	3R:15170800-15184400	0.42	0.69	-	-	-	-	Mf, 3UTR	Gyc88E, intron	Gyc88E, Mf
P61	Control-Freec	DUP	3L	8463307	3L	8468386	-	-	somatic_tumour	5.1	3L:8463307-8468386	0.47	0.81	-	-	-	-	Gug, exon_5	Gug, exon_7	Gug
D1	Control-Freec	DUP	3L	11288160	3L	11291376	-	-	somatic_tumour	3.2	3L:11288160-11291376	0.37	0.54	-	-	-	-	CG6175, 3UTR	CG6175, intron	CG6175
D1	Control-Freec	DUP	3R	1453632	3R	1456044	-	-	somatic_tumour	2.4	3R:1453632-1456044	0.49	0.8	-	-	-	-	Myo81F, intron	Myo81F, intron	Myo81F
D1	Control-Freec	DUP	4	804	4	4824	-	-	somatic_tumour	4	4:804-4824	0.41	0.67	-	-	-	-	intergenic	JYalpha, exon_5	JYalpha
D1	Control-Freec	DUP	4	1192332	4	1195548	-	-	somatic_tumour	3.2	4:1192332-1195548	0.4	0.63	-	-	-	-	CG33521, intron	PIP4K, exon_6	CG33521, PIP4K
D3	Control-Freec	DUP	2L	19170263	2L	19178260	-	-	somatic_tumour	8	2L:19170263-19178260	0.31	0.42	-	-	-	-	brat, exon	brat, 3UTR	brat
D3	novobreak	DUP	2R	3204767	2R	3283054	7	7	germline_private	78.3	2R:3204767-3283054	-	0	-	-	ATATAACGGAACTCGCGTCACCAACAACTCAGATTTTTTGTGCTAAAATTAAAATATCCACATTAATCCAACGACATCTAACTACTGTGACCGTGAATTAAGTATTGCACTAACCCAACTAAGAATAAAATATTAAAAAATGTGGACTGAATACTTAATATAAATTACAAGACACTAAGAATAATAAAAATTAGAAAAAAAAGAAACACAAATACAAATAAACCAAAGTCTATAACCAAAAATATTTTTAAAAAATCAACACGAAGGGGGAAGA	-	intergenic	intergenic	-
D3	Control-Freec	DUP	2R	4562652	2R	4564833	-	-	somatic_tumour	2.2	2R:4562652-4564833	0.4	0.77	-	-	-	-	Stlk, intron	Stlk, 3UTR	Stlk
D3	Control-Freec	DUP	2R	17699542	2R	17704631	-	-	somatic_tumour	5.1	2R:17699542-17704631	0.29	0.43	-	-	-	-	Uhg1, ncRNA	CG6424, exon	Uhg1, snoRNA:Me28S-A3407a, snoRNA:Me28S-A1666a, snoRNA:U29:54Eb, snoRNA:U29:54Ec, snoRNA:U76:54Eb, snoRNA:U29:54Ed, snoRNA:U27:54Ea, snoRNA:Me28S-G3277a, snoRNA:snR38:54Eb, snoRNA:U31:54Eb, snoRNA:U31:54Ec, snoRNA:U31:54Ed, snoRNA:U27:54Eb, snoRNA:snR38:54Ec, snoRNA:Me18S-A28a, CG6424
D3	Control-Freec	DUP	3L	8937011	3L	8940646	-	-	somatic_tumour	3.6	3L:8937011-8940646	0.43	0.73	-	-	-	-	CG43783, intron	orb2, 3UTR	CG43783, orb2
D3	Control-Freec	DUP	3R	26275234	3R	26278869	-	-	somatic_tumour	3.6	3R:26275234-26278869	0.33	0.43	-	-	-	-	CG6154, 3UTR	intergenic	CG6154
D3	Control-Freec	DUP	4	109050	4	112685	-	-	somatic_tumour	3.6	4:109050-112685	0.43	0.67	-	-	-	-	pan, 3UTR	pan, 3UTR	pan
D3	Control-Freec	DUP	4	337328	4	340236	-	-	somatic_tumour	2.9	4:337328-340236	0.41	0.62	-	-	-	-	PMCA, intron	PMCA, intron	PMCA
D3	Control-Freec	DUP	4	565606	4	567787	-	-	somatic_tumour	2.2	4:565606-567787	0.43	0.71	-	-	-	-	Pur-alpha, exon	intergenic	Pur-alpha
D3	Control-Freec	DUP	4	687015	4	697920	-	-	somatic_tumour	10.9	4:687015-697920	0.35	0.58	-	-	-	-	CG11360, 3UTR	ey, intron	CG11360, myo, ey
