# Supplementary material for: Evolution and genomic signatures of spontaneous somatic mutation in Drosophila intestinal stem cells
Source: HighWire-hosted journal article supplement (doi:10.1101/gr.268441.120), 2021-06-24
Supplement: Supplemental_table_S3.xlsx [file Supplemental_table_S3.xlsx]

## Sheet: Sheet 1
Supplemental Table S3		Simulated sequencing reads containing structural variants across the mappable genome
	List of simulated structural variant events (deletion, inversion, and tandem duplication; using VISOR v1.0, across all chromosome arms. These simulated SV events were used to test the pipeline, whose detection of these events is reported in Supplemental Fig. S2; Supplemental Table S3.
chromosome	breakpoint 1	breakpoint 2	SV class	length (Kb)
2L	5000000	5050000	deletion	50
2L	6150000	6155000	tandem duplication	5
2L	7160000	7310000	deletion	150
2L	8312000	8387000	tandem duplication	75
2L	9437000	9438000	inversion	1
2L	10463000	10470000	inversion	7
2L	11485000	11487000	inversion	2
2L	12489000	12509000	deletion	20
2L	5550000	5650000	deletion	100
2L	6655000	6660000	inversion	5
2L	7810000	7812000	deletion	2
2L	8887000	8937000	deletion	50
2L	9938000	9963000	deletion	25
2L	10970000	10985000	tandem duplication	15
2L	11987000	11989000	tandem duplication	2
2R	5000000	5050000	deletion	50
2R	6150000	6155000	tandem duplication	5
2R	7160000	7310000	deletion	150
2R	8312000	8387000	tandem duplication	75
2R	9437000	9438000	inversion	1
2R	10463000	10470000	inversion	7
2R	11485000	11487000	inversion	2
2R	12489000	12509000	deletion	20
2R	5550000	5650000	deletion	100
2R	6655000	6660000	inversion	5
2R	7810000	7812000	deletion	2
2R	8887000	8937000	deletion	50
2R	9938000	9963000	deletion	25
2R	10970000	10985000	tandem duplication	15
2R	11987000	11989000	tandem duplication	2
3L	5000000	5050000	deletion	50
3L	6150000	6155000	tandem duplication	5
3L	7160000	7310000	deletion	150
3L	8312000	8387000	tandem duplication	75
3L	9437000	9438000	inversion	1
3L	10463000	10470000	inversion	7
3L	11485000	11487000	inversion	2
3L	12489000	12509000	deletion	20
3L	5550000	5650000	deletion	100
3L	6655000	6660000	inversion	5
3L	7810000	7812000	deletion	2
3L	8887000	8937000	deletion	50
3L	9938000	9963000	deletion	25
3L	10970000	10985000	tandem duplication	15
3L	11987000	11989000	tandem duplication	2
3R	5000000	5050000	deletion	50
3R	6150000	6155000	tandem duplication	5
3R	7160000	7310000	deletion	150
3R	8312000	8387000	tandem duplication	75
3R	9437000	9438000	inversion	1
3R	10463000	10470000	inversion	7
3R	11485000	11487000	inversion	2
3R	12489000	12509000	deletion	20
3R	5550000	5650000	deletion	100
3R	6655000	6660000	inversion	5
3R	7810000	7812000	deletion	2
3R	8887000	8937000	deletion	50
3R	9938000	9963000	deletion	25
3R	10970000	10985000	tandem duplication	15
3R	11987000	11989000	tandem duplication	2
4	200000	250000	deletion	50
4	390000	395000	tandem duplication	5
4	440000	590000	deletion	150
4	632000	707000	tandem duplication	75
4	797000	798000	inversion	1
4	863000	870000	inversion	7
4	925000	927000	inversion	2
4	969000	989000	deletion	20
4	270000	370000	deletion	100
4	415000	420000	inversion	5
4	610000	612000	deletion	2
4	727000	777000	deletion	50
4	818000	843000	deletion	25
4	890000	905000	tandem duplication	15
4	947000	949000	tandem duplication	2
X	5000000	5050000	deletion	50
X	6150000	6155000	tandem duplication	5
X	7160000	7310000	deletion	150
X	8312000	8387000	tandem duplication	75
X	9437000	9438000	inversion	1
X	10463000	10470000	inversion	7
X	11485000	11487000	inversion	2
X	12489000	12509000	deletion	20
X	5550000	5650000	deletion	100
X	6655000	6660000	inversion	5
X	7810000	7812000	deletion	2
X	8887000	8937000	deletion	50
X	9938000	9963000	deletion	25
X	10970000	10985000	tandem duplication	15
X	11987000	11989000	tandem duplication	2
