# Supplementary material for: Evolution and genomic signatures of spontaneous somatic mutation in Drosophila intestinal stem cells
Source: HighWire-hosted journal article supplement (doi:10.1101/gr.268441.120), 2021-06-24
Supplement: Supplemental_table_S4.xlsx [file Supplemental_table_S4.xlsx]

## Sheet: Sheet 1
Supplementary Table S4		Detection of simulated variants (from Table S3) at different depths and tumour purity
	Output of pipeline run against simulated structural variants (Supplemental Table S1), at different depth (10X or 30X) and different tumour purities (20%, 40%, 60%, 80%, 100%). “Observed” is the number we detected “expected” is the number present in the starting simulated dataset.
sample	SV type	error group	observed	expected	detection rate (%)	depth	tumour purity	replicate
simulated sample1	deletion	false positive	2	0	NA	10	100	1
simulated sample1	inversion	false positive	3	0	NA	10	100	1
simulated sample1	inversion	true positive	18	24	75	10	100	1
simulated sample1	deletion	false negative	28	42	66.6667	10	100	1
simulated sample1	tandem duplication	false negative	14	24	58.3333	10	100	1
simulated sample1	tandem duplication	true positive	10	24	41.6667	10	100	1
simulated sample1	deletion	true positive	14	42	33.3333	10	100	1
simulated sample1	inversion	false negative	6	24	25	10	100	1
simulated sample3	inversion	false positive	3	0	NA	10	80	1
simulated sample3	inversion	true positive	18	24	75	10	80	1
simulated sample3	tandem duplication	false negative	15	24	62.5	10	80	1
simulated sample3	deletion	false negative	23	42	54.7619	10	80	1
simulated sample3	deletion	true positive	19	42	45.2381	10	80	1
simulated sample3	tandem duplication	true positive	9	24	37.5	10	80	1
simulated sample3	inversion	false negative	6	24	25	10	80	1
simulated sample5	deletion	false positive	1	0	NA	10	60	1
simulated sample5	deletion	false negative	34	42	80.9524	10	60	1
simulated sample5	inversion	true positive	18	24	75	10	60	1
simulated sample5	tandem duplication	false negative	17	24	70.8333	10	60	1
simulated sample5	tandem duplication	true positive	7	24	29.1667	10	60	1
simulated sample5	inversion	false negative	6	24	25	10	60	1
simulated sample5	deletion	true positive	8	42	19.0476	10	60	1
simulated sample7	deletion	false negative	38	42	90.4762	10	40	1
simulated sample7	tandem duplication	false negative	20	24	83.3333	10	40	1
simulated sample7	inversion	false negative	14	24	58.3333	10	40	1
simulated sample7	inversion	true positive	10	24	41.6667	10	40	1
simulated sample7	tandem duplication	true positive	4	24	16.6667	10	40	1
simulated sample7	deletion	true positive	4	42	9.52381	10	40	1
simulated sample9	tandem duplication	false negative	24	24	100	10	20	1
simulated sample9	deletion	false negative	41	42	97.619	10	20	1
simulated sample9	inversion	false negative	23	24	95.8333	10	20	1
simulated sample9	inversion	true positive	1	24	4.16667	10	20	1
simulated sample9	deletion	true positive	1	42	2.38095	10	20	1
simulated sample11	inversion	false positive	1	0	NA	30	100	1
simulated sample11	tandem duplication	true positive	23	24	95.8333	30	100	1
simulated sample11	deletion	true positive	38	42	90.4762	30	100	1
simulated sample11	inversion	true positive	21	24	87.5	30	100	1
simulated sample11	inversion	false negative	3	24	12.5	30	100	1
simulated sample11	deletion	false negative	4	42	9.52381	30	100	1
simulated sample11	tandem duplication	false negative	1	24	4.16667	30	100	1
simulated sample13	inversion	true positive	22	24	91.6667	30	80	1
simulated sample13	tandem duplication	true positive	22	24	91.6667	30	80	1
simulated sample13	deletion	true positive	36	42	85.7143	30	80	1
simulated sample31	inversion	false negative	2	24	8.33333	30	100	2
simulated sample31	tandem duplication	false negative	1	24	4.16667	30	100	2
simulated sample31	deletion	false negative	1	42	2.38095	30	100	2
simulated sample15	deletion	false positive	1	0	NA	30	60	1
simulated sample15	inversion	true positive	22	24	91.6667	30	60	1
simulated sample15	tandem duplication	true positive	21	24	87.5	30	60	1
simulated sample15	deletion	true positive	31	42	73.8095	30	60	1
simulated sample51	inversion	false negative	2	24	8.33333	30	100	3
simulated sample51	tandem duplication	false negative	1	24	4.16667	30	100	3
simulated sample51	deletion	false negative	1	42	2.38095	30	100	3
simulated sample17	inversion	false positive	1	0	NA	30	40	1
simulated sample17	inversion	true positive	20	24	83.3333	30	40	1
simulated sample17	tandem duplication	true positive	14	24	58.3333	30	40	1
simulated sample13	deletion	false negative	6	42	14.2857	30	80	1
simulated sample17	deletion	true positive	21	42	50	30	40	1
simulated sample13	inversion	false negative	2	24	8.33333	30	80	1
simulated sample13	tandem duplication	false negative	2	24	8.33333	30	80	1
simulated sample33	inversion	false negative	2	24	8.33333	30	80	2
simulated sample33	tandem duplication	false negative	1	24	4.16667	30	80	2
simulated sample19	inversion	true positive	16	24	66.6667	30	20	1
simulated sample33	deletion	false negative	1	42	2.38095	30	80	2
simulated sample19	deletion	true positive	4	42	9.52381	30	20	1
simulated sample19	tandem duplication	true positive	1	24	4.16667	30	20	1
simulated sample21	deletion	false positive	2	0	NA	10	100	2
simulated sample21	tandem duplication	true positive	21	24	87.5	10	100	2
simulated sample21	deletion	true positive	33	42	78.5714	10	100	2
simulated sample21	inversion	true positive	17	24	70.8333	10	100	2
simulated sample21	inversion	false negative	7	24	29.1667	10	100	2
simulated sample21	deletion	false negative	9	42	21.4286	10	100	2
simulated sample21	tandem duplication	false negative	3	24	12.5	10	100	2
simulated sample23	deletion	false positive	1	0	NA	10	80	2
simulated sample23	tandem duplication	false positive	2	0	NA	10	80	2
simulated sample23	inversion	true positive	20	24	83.3333	10	80	2
simulated sample23	deletion	true positive	34	42	80.9524	10	80	2
simulated sample23	tandem duplication	true positive	18	24	75	10	80	2
simulated sample23	tandem duplication	false negative	6	24	25	10	80	2
simulated sample23	deletion	false negative	8	42	19.0476	10	80	2
simulated sample23	inversion	false negative	4	24	16.6667	10	80	2
simulated sample25	deletion	false positive	2	0	NA	10	60	2
simulated sample25	inversion	true positive	20	24	83.3333	10	60	2
simulated sample25	deletion	true positive	29	42	69.0476	10	60	2
simulated sample25	tandem duplication	true positive	14	24	58.3333	10	60	2
simulated sample25	tandem duplication	false negative	10	24	41.6667	10	60	2
simulated sample25	deletion	false negative	13	42	30.9524	10	60	2
simulated sample25	inversion	false negative	4	24	16.6667	10	60	2
simulated sample27	deletion	false positive	1	0	NA	10	40	2
simulated sample27	inversion	false positive	2	0	NA	10	40	2
simulated sample27	tandem duplication	false negative	19	24	79.1667	10	40	2
simulated sample27	deletion	false negative	31	42	73.8095	10	40	2
simulated sample27	inversion	false negative	17	24	70.8333	10	40	2
simulated sample27	inversion	true positive	7	24	29.1667	10	40	2
simulated sample27	deletion	true positive	11	42	26.1905	10	40	2
simulated sample27	tandem duplication	true positive	5	24	20.8333	10	40	2
simulated sample29	tandem duplication	false negative	24	24	100	10	20	2
simulated sample29	deletion	false negative	40	42	95.2381	10	20	2
simulated sample29	inversion	false negative	21	24	87.5	10	20	2
simulated sample29	inversion	true positive	3	24	12.5	10	20	2
simulated sample29	deletion	true positive	2	42	4.7619	10	20	2
simulated sample31	deletion	false positive	1	0	NA	30	100	2
simulated sample31	deletion	true positive	41	42	97.619	30	100	2
simulated sample31	tandem duplication	true positive	23	24	95.8333	30	100	2
simulated sample31	inversion	true positive	22	24	91.6667	30	100	2
simulated sample53	inversion	false negative	2	24	8.33333	30	80	3
simulated sample53	tandem duplication	false negative	1	24	4.16667	30	80	3
simulated sample53	deletion	false negative	1	42	2.38095	30	80	3
simulated sample33	deletion	true positive	41	42	97.619	30	80	2
simulated sample33	tandem duplication	true positive	23	24	95.8333	30	80	2
simulated sample33	inversion	true positive	22	24	91.6667	30	80	2
simulated sample15	deletion	false negative	10	42	23.8095	30	60	1
simulated sample15	tandem duplication	false negative	4	24	16.6667	30	60	1
simulated sample15	inversion	false negative	2	24	8.33333	30	60	1
simulated sample35	deletion	false positive	1	0	NA	30	60	2
simulated sample35	deletion	true positive	41	42	97.619	30	60	2
simulated sample35	tandem duplication	true positive	23	24	95.8333	30	60	2
simulated sample35	inversion	true positive	21	24	87.5	30	60	2
simulated sample35	inversion	false negative	3	24	12.5	30	60	2
simulated sample35	tandem duplication	false negative	1	24	4.16667	30	60	2
simulated sample35	deletion	false negative	1	42	2.38095	30	60	2
simulated sample37	deletion	true positive	32	42	76.1905	30	40	2
simulated sample37	inversion	true positive	17	24	70.8333	30	40	2
simulated sample37	tandem duplication	true positive	17	24	70.8333	30	40	2
simulated sample55	inversion	false negative	3	24	12.5	30	60	3
simulated sample55	deletion	false negative	4	42	9.52381	30	60	3
simulated sample55	tandem duplication	false negative	1	24	4.16667	30	60	3
simulated sample17	deletion	false negative	21	42	50	30	40	1
simulated sample17	tandem duplication	false negative	10	24	41.6667	30	40	1
simulated sample39	inversion	true positive	13	24	54.1667	30	20	2
simulated sample17	inversion	false negative	4	24	16.6667	30	40	1
simulated sample39	deletion	true positive	9	42	21.4286	30	20	2
simulated sample39	tandem duplication	true positive	2	24	8.33333	30	20	2
simulated sample41	deletion	false positive	3	0	NA	10	100	3
simulated sample41	tandem duplication	true positive	22	24	91.6667	10	100	3
simulated sample41	deletion	true positive	33	42	78.5714	10	100	3
simulated sample41	inversion	true positive	18	24	75	10	100	3
simulated sample41	inversion	false negative	6	24	25	10	100	3
simulated sample41	deletion	false negative	9	42	21.4286	10	100	3
simulated sample41	tandem duplication	false negative	2	24	8.33333	10	100	3
simulated sample43	deletion	false positive	3	0	NA	10	80	3
simulated sample43	inversion	true positive	21	24	87.5	10	80	3
simulated sample43	deletion	true positive	36	42	85.7143	10	80	3
simulated sample43	tandem duplication	true positive	20	24	83.3333	10	80	3
simulated sample43	tandem duplication	false negative	4	24	16.6667	10	80	3
simulated sample43	deletion	false negative	6	42	14.2857	10	80	3
simulated sample43	inversion	false negative	3	24	12.5	10	80	3
simulated sample45	deletion	false positive	4	0	NA	10	60	3
simulated sample45	inversion	true positive	19	24	79.1667	10	60	3
simulated sample45	deletion	true positive	29	42	69.0476	10	60	3
simulated sample45	tandem duplication	true positive	13	24	54.1667	10	60	3
simulated sample45	tandem duplication	false negative	11	24	45.8333	10	60	3
simulated sample45	deletion	false negative	13	42	30.9524	10	60	3
simulated sample45	inversion	false negative	5	24	20.8333	10	60	3
simulated sample47	deletion	false negative	35	42	83.3333	10	40	3
simulated sample47	tandem duplication	false negative	16	24	66.6667	10	40	3
simulated sample47	inversion	false negative	12	24	50	10	40	3
simulated sample47	inversion	true positive	12	24	50	10	40	3
simulated sample47	tandem duplication	true positive	8	24	33.3333	10	40	3
simulated sample47	deletion	true positive	7	42	16.6667	10	40	3
simulated sample49	deletion	false negative	42	42	100	10	20	3
simulated sample49	tandem duplication	false negative	23	24	95.8333	10	20	3
simulated sample49	inversion	false negative	19	24	79.1667	10	20	3
simulated sample49	inversion	true positive	5	24	20.8333	10	20	3
simulated sample49	tandem duplication	true positive	1	24	4.16667	10	20	3
simulated sample51	deletion	true positive	41	42	97.619	30	100	3
simulated sample51	tandem duplication	true positive	23	24	95.8333	30	100	3
simulated sample51	inversion	true positive	22	24	91.6667	30	100	3
simulated sample37	inversion	false negative	7	24	29.1667	30	40	2
simulated sample37	tandem duplication	false negative	7	24	29.1667	30	40	2
simulated sample37	deletion	false negative	10	42	23.8095	30	40	2
simulated sample53	deletion	false positive	1	0	NA	30	80	3
simulated sample53	deletion	true positive	41	42	97.619	30	80	3
simulated sample53	tandem duplication	true positive	23	24	95.8333	30	80	3
simulated sample53	inversion	true positive	22	24	91.6667	30	80	3
simulated sample57	deletion	false negative	11	42	26.1905	30	40	3
simulated sample57	inversion	false negative	6	24	25	30	40	3
simulated sample57	tandem duplication	false negative	6	24	25	30	40	3
simulated sample55	deletion	false positive	2	0	NA	30	60	3
simulated sample55	inversion	false positive	1	0	NA	30	60	3
simulated sample55	tandem duplication	true positive	23	24	95.8333	30	60	3
simulated sample55	deletion	true positive	38	42	90.4762	30	60	3
simulated sample55	inversion	true positive	21	24	87.5	30	60	3
simulated sample19	tandem duplication	false negative	23	24	95.8333	30	20	1
simulated sample19	deletion	false negative	38	42	90.4762	30	20	1
simulated sample19	inversion	false negative	8	24	33.3333	30	20	1
simulated sample57	tandem duplication	false positive	1	0	NA	30	40	3
simulated sample57	inversion	true positive	18	24	75	30	40	3
simulated sample57	tandem duplication	true positive	18	24	75	30	40	3
simulated sample57	deletion	true positive	31	42	73.8095	30	40	3
simulated sample39	tandem duplication	false negative	22	24	91.6667	30	20	2
simulated sample39	deletion	false negative	33	42	78.5714	30	20	2
simulated sample39	inversion	false negative	11	24	45.8333	30	20	2
simulated sample59	deletion	false negative	36	42	85.7143	30	20	3
simulated sample59	tandem duplication	false negative	19	24	79.1667	30	20	3
simulated sample59	inversion	true positive	16	24	66.6667	30	20	3
simulated sample59	inversion	false negative	8	24	33.3333	30	20	3
simulated sample59	tandem duplication	true positive	5	24	20.8333	30	20	3
simulated sample59	deletion	true positive	6	42	14.2857	30	20	3
