# Supplementary material for: Evolution and genomic signatures of spontaneous somatic mutation in Drosophila intestinal stem cells
Source: HighWire-hosted journal article supplement (doi:10.1101/gr.268441.120), 2021-06-24
Supplement: Supplemental_table_S5.xlsx [file Supplemental_table_S5.xlsx]

## Sheet: Sheet1
Supplemental Table S5			Comparison of randomly selected structural variants from the filtered Chakraborty calls with those detected using the Riddiford pipeline
			Chakraborty A4 variants from: https://github.com/mahulchak/dspr-asm/blob/master/variants-raw/sv.a4.txt.gz
			Chakraborty group-wide variants from: http://wfitch.bio.uci.edu/~tdlong/SantaCruzTracks/DSPR_R6/dm6/variation/SV.0328.vcf.gz
		50 structural variants from the A4 unfiltered genome in Chakraborty, et al. 2019 were randomly selected and used to assess the ability of our pipeline to make the same calls. Our pipeline was run on a genome containing the A4 variants, and we manually inspected each Chakraborty et al. call in IGV for read support. Calls made by our pipeline were produced as described in Supplemental Methods, sect…
Chrom	bp1	bp2	SV type	Length (bps)	IGV	Called by Riddiford	Callers	Notes	Chakraborty SV type (group-wise)	Chakraborty CE number		Abbreviation	Caller		Called by Riddiford	count	percentage
2L	1643294	1643410	DEL	116	2L:1643294-1643410	FALSE		No PE-support; likely miscalled indel	DEL:COM	2		d	Delly		TRUE	16	0.32
2L	1783754	1788847	INV	5093	2L:1783754-1788847	FALSE		No PE-support; possibly inv with insertions at bps	INS:ME	1		l	Lumpy		FALSE	32	0.64
2L	5758390	5758582	DEL	192	2L:5758390-5758582	TRUE	d, l, n		DEL	0		n	Novobreak		NA	1	0.02
2L	6147237	6147362	DEL	125	2L:6147237-6147362	FALSE		No PE-support; likely insertion; possible false negative	DEL:COM	0		cf	Control-Freec
2L	7071985	7072087	DEL	102	2L:7071985-7072087	TRUE	l	miscalled bps; similar strange read sig	na	na
2L	7399354	7399679	DEL	325	2L:7399354-7399679	TRUE	d, l, n		DEL	0
2L	8681157	8681279	DEL	122	2L:8681157-8681279	FALSE		No PE-support; likely miscalled indel	na	na			Tally of SV type of Chakraborty FALSE positive calls
2L	9893500	9893635	DEL	135	2L:9893500-9893635	FALSE		No PE-support; likely miscalled indel	DEL:COM	0					Chakraborty SV type	count	percentage
2L	10169366	10169590	DEL	224	2L:10169366-10169590	TRUE	d, l, n		DEL	1					DEL:COM	22	0.667
2L	11201719	11201844	DEL	125	2L:11201719-11201844	FALSE		No PE-support; likely miscalled indel	DEL:COM	1					INS:ME	1	0.03
2L	11366147	11366254	DEL	107	2L:11366147-11366254	FALSE		No PE-support; likely miscalled indel	DEL:COM	0					DEL	0	0
2L	12026746	12026987	DEL	241	2L:12026746-12026987	TRUE	l	Miscalled breakpoints	DEL	0					INS:COM	1	0.03
2L	13863025	13863217	DEL	192	2L:13863025-13863217	FALSE		No PE-support; likely miscalled indel	DEL:COM	2					na*	9	0.273
2L	13893611	13893717	DEL	106	2L:13893611-13893717	FALSE		No PE-support; likely miscalled indel	DEL:COM	0
2L	14520192	14520313	DEL	121	2L:14520192-14520313	FALSE		No PE-support; likely miscalled indel	DEL:COM	1
2L	22577523	22578323	DEL	800	2L:22577523-22578323	TRUE	d, l, n, cf		na	na
2R	9531896	9532000	DEL	104	2R:9531896-9532000	FALSE		No PE-support; likely miscalled indel	DEL:COM	2			Tally of CE numberof Chakraborty FALSE positive calls
2R	11171581	11171686	DEL	105	2R:11171581-11171686	TRUE	d, l, n		DEL	0					Chakraborty CE number	count	percentage
2R	12439311	12439435	DEL	124	2R:12439311-12439435	FALSE		No PE-support; likely miscalled indel	na	na					0	16	0.485
2R	13622174	13622280	DEL	106	2R:13622174-13622280	FALSE	l	No PE-support; likely insertion	na	na					1	4	0.121
2R	16828423	16828536	DEL	113	2R:16828423-16828536	FALSE		No PE-support; likely miscalled indel	DEL:COM	0					2	3	0.091
2R	17745335	17745665	DEL	330	2R:17745335-17745665	TRUE	d, l, n		DEL	0					na*	9	0.273
2R	18042826	18043069	DEL	243	2R:18042826-18043069	FALSE		No PE-support; likely miscalled indel	na	na
2R	22763560	22763673	DEL	113	2R:22763560-22763673	FALSE		No PE-support; likely miscalled indel	DEL:COM	0					*na calls present in A4 genome but not the group-wide calls
3L	3763789	3763968	DEL	179	3L:3763789-3763968	FALSE		No PE-support; likely miscalled indel	na	na
3L	5380707	5380817	DEL	110	3L:5380707-5380817	FALSE		No PE-support; likely miscalled indel	DEL:COM	0
3L	6119175	6119276	DEL	101	3L:6119175-6119276	FALSE		No PE-support; likely miscalled indel	na	na
3L	8651778	8651978	DEL	200	3L:8651778-8651978	FALSE		No PE-support; likely miscalled indel	DEL:COM	0
3L	9754729	9754839	DEL	110	3L:9754729-9754839	FALSE		No PE-support; likely miscalled indel	DEL:COM	0
3L	11290676	11290950	DEL	274	3L:11290676-11290950	TRUE	d, l, n		DEL	1
3L	11672168	11672283	DEL	115	3L:11672168-11672283	FALSE		No PE-support; likely miscalled indel	DEL:COM	0
3L	12066981	12067136	DEL	155	3L:12066981-12067136	FALSE		No PE-support; likely miscalled indel	DEL:COM	0
3L	12273154	12273407	DEL	253	3L:12273154-12273407	TRUE	d, l, n		DEL	2
3L	12679978	12680115	DEL	137	3L:12679978-12680115	FALSE		No PE-support; likely miscalled indel	INS:COM	1
3L	14175402	14175502	DEL	100	3L:14175402-14175502	TRUE	d, l		INS:COM	0
3L	14546712	14546913	DEL	201	3L:14546712-14546913	FALSE		No PE-support; likely miscalled indel	DEL:COM	0
3L	15658557	15658726	DEL	169	3L:15658557-15658726	FALSE		No PE-support; likely miscalled indel	DEL:COM	2
3R	20564172	20564478	DEL	306	3R:20564172-20564478	TRUE	d, l, n		DEL	0
3R	25365479	25365622	DEL	143	3R:25365479-25365622	FALSE		No PE-support; likely misassembly	DEL:COM	0
3R	28042019	28042181	DEL	162	3R:28042019-28042181	FALSE		No PE-support; likely miscalled indel	DEL:COM	0
4	259986	260572	DEL	586	4:259986-260572	TRUE	d, l, n		na	na
X	9297050	9297356	DEL	306	X:9297050-9297356	TRUE	d, l, n		DEL	0
X	12540447	12540604	DEL	157	X:12540447-12540604	FALSE		No PE-support; likely miscalled indel	DEL:COM	0
X	16265882	16266021	DEL	139	X:16265882-16266021	FALSE		No PE-support; likely miscalled indel	DEL:COM	0
X	16748081	16748216	DEL	135	X:16748081-16748216	FALSE		No PE-support; likely miscalled indel	na	na
X	16873991	16874117	DEL	126	X:16873991-16874117	NA		Possibly TE-mediated event; possibly miscalled	DEL:COM	0
X	17546983	17547102	DEL	119	X:17546983-17547102	TRUE	l, d		DEL:COM	0
X	19095864	19096033	DEL	169	X:19095864-19096033	FALSE		No PE-support; likely miscalled indel	na	na
X	20506981	20507217	DEL	236	X:20506981-20507217	TRUE	l		na	na
X	22662028	22662215	DEL	187	X:22662028-22662215	FALSE		No PE-support; likely miscalled indel	na	na
