# Supplementary material for: Evolution and genomic signatures of spontaneous somatic mutation in Drosophila intestinal stem cells
Source: HighWire-hosted journal article supplement (doi:10.1101/gr.268441.120), 2021-06-24
Supplement: Supplemental_table_S6.xlsx [file Supplemental_table_S6.xlsx]

## Sheet: Sheet1
Supplemental Table S6			Comparision of variants detected by Riddiford pipeline and calls from Chakraborty et al.
			50 structural variants detected using our pipeline (Riddiford pipeline) and compared with previous calls made by Chakraborty et al. 2019. Here an artificial, heterozygous "tumour" genome was created composed of reads generated from a de novo assembly of a non-reference Drosophila melanogaster strain (strain “A4” in Chakraborty et al. 2019), combined with the D.mel reference genome (6.12). It was …
Chrom	bp1	bp2	SV type	Length (bps)	IGV	Riddiford	Chakraborty	Callers	Status	Notes					count	percentage
2L	4156562	4156718	DEL	156	2L:4156562-4156718	T	T	l, n	tptp		Abbreviation	Caller		True positive	45	0.9
2L	4184530	4184795	DEL	265	2L:4184530-4184795	T	T	l, d, n	tptp		d	Delly		False positive	2	0.04
2L	5944553	5949043	TANDUP	4490	2L:5944553-5949043	T	T	l, d, n, cf	tptp		l	Lumpy		NA	3	0.06
2L	14375477	20285869	TRA	5910392	2L:14375477	T	T	l, d	tptp	TE event; miscalled CNV Chakraborty	n	Novobreak		Total		1
2L	14585605	14585750	DEL	145	2L:14585605-14585750	T	T	l, d, n	tptp		cf	Control-Freec
2L	14639216	14639361	DEL	145	2L:14639216-14639361	T	T	l, n	tptp		tp	true positive
2L	17167566	17167804	DEL	238	2L:17167566-17167804	T	T	l, d, n	tptp	Germline TE	fp	false positive		Called in both Riddiford and Chakraborty	41	0.82
2L	18041485	18041700	DEL	215	2L:18041485-18041700	T	T	l, d, n	tptp		fn	false negative		False negative in Chakraborty	4	0.08
2L	19407760	19407915	DEL	155	2L:19407760-19407915	T	T	l, d, n	tptp		T	TRUE
2L	21301819	21302103	DEL	284	2L:21301819-21302103	T	T	l, d, n	tptp		F	FALSE
2L	21739126	21742059	TANDUP	2933	2L:21739126-21742059	T	T	l, d, n, cf	tptp	Miscalled breakpoints Chakraborty
2L	21739203	21741006	DEL	1803	2L:21739203-21741006	T	F	l, d, n	tpfn
2L	22002821	22004610	TANDUP	1789	2L:22002821-22004610	?	F	l, d, n	na	TE events
2R	493472	2742561	DEL	2249089	2R:493472-2742561	F	F	n	fptn	False positive Riddiford
2R	4946383	5035721	DEL	89338	2R:4946383-5035721	?	?	l, d, n	na
2R	5039427	5039810	DEL	383	2R:5039427-5039810	T	F	l, d, n	tpfn	False negative Chakraborty; complex del
2R	5376010	5376243	DEL	233	2R:5376010-5376243	T	T	l, d, n	tptp
2R	5394949	777930	TRA	-4617019	2R:5394949	T	T	l, n	tptp	TE
2R	5720031	5720408	DEL	377	2R:5720031-5720408	T	F	l, d, n	tpfn	False negative Chakraborty; germline TE?
2R	5739051	5739380	DEL	329	2R:5739051-5739380	T	T	l, d, n	tptp	Germline TE
2R	10122771	10122951	DEL	180	2R:10122771-10122951	T	T	l, n	tptp
2R	10129737	10130083	DEL	346	2R:10129737-10130083	T	T	l, d, n	tptp
2R	22360438	22360810	DEL	372	2R:22360438-22360810	T	T	l, d, n	tptp	Germline TE
2R	23254084	23254259	DEL	175	2R:23254084-23254259	T	T	l, d	tptp
3L	3475123	3475515	DEL	392	3L:3475123-3475515	T	T	l, d, n	tptp	Germline TE
3L	5088263	5088896	DEL	633	3L:5088263-5088896	T	T	l, d, n	tptp
3L	5537780	5538059	DEL	279	3L:5537780-5538059	T	T	l, d, n	tptp	Germline TE
3L	6064253	6064650	DEL	397	3L:6064253-6064650	T	T	l, d, n	tptp
3L	8868526	8868671	DEL	145	3L:8868526-8868671	T	T	l	tptp	Miscalled breakpoints Chakraborty
3L	13315974	13316186	DEL	212	3L:13315974-13316186	T	T	l, d, n	tptp
3L	14970817	14971064	DEL	247	3L:14970817-14971064	T	T	l, d, n	tptp	Germline TE
3L	19683622	19683758	DEL	136	3L:19683622-19683758	T	T	l, d, n	tptp
3L	22224444	18538147	TRA	-3686297	3L:22224444	T	T	l, d, n	tptp	Miscalled INS in Chakraborty
3L	23109474	23204276	DEL	94802	3L:23109474-23204276	?	?	d	na	Complex rearrangement; miscalled INS in Chakraborty
3L	23317079	23344404	BND	27325	3L:23317079-23344404	T	T	l, d, n	tptp	Miscalled INS in Chakraborty
3R	3774544	22494692	TRA	18720148	3R:3774544	F	F	n	fptn	False positive Riddiford
3R	9398068	9400091	TANDUP	2023	3R:9398068-9400091	T	T	l, d, n, cf	tptp	Miscalled breakpoints Chakraborty
3R	19140321	19140712	DEL	391	3R:19140321-19140712	T	T	l, d, n	tptp
3R	20860882	20860996	DEL	114	3R:20860882-20860996	T	T	l, d, n	tptp
3R	22108409	22108585	DEL	176	3R:22108409-22108585	T	T	l, d, n	tptp
3R	24594689	24594875	DEL	186	3R:24594689-24594875	T	T	d, n	tptp	Germline TE
3R	28975988	28976490	DEL	502	3R:28975988-28976490	T	T	l, d, n	tptp
3R	31258491	31258727	DEL	236	3R:31258491-31258727	T	T	l, d, n	tptp
X	3354577	3355144	TANDUP	567	X:3354577-3355144	T	T	l, d, n	tptp	Miscalled breakpoints Chakraborty
X	8294382	8295489	DEL	1107	X:8294382-8295489	T	T	cf	tptp	Germline TE; possible plasmodium integration
X	10954981	17837380	TRA	6882399	X:10954981	T	T	n	tptp	Miscalled INS in Chakraborty
X	16874011	16874117	DEL	106	X:16874011-16874117	T	T	l	tptp
X	19822883	19822996	DEL	113	X:19822883-19822996	T	F	l, d, n	tpfn	False negative Chakraborty
X	21044220	21044392	DEL	172	X:21044220-21044392	T	T	l, d, n	tptp
X	21769356	21770159	DEL	803	X:21769356-21770159	T	T	l, d, n	tptp
