# Supplementary material for: Evolution and genomic signatures of spontaneous somatic mutation in Drosophila intestinal stem cells
Source: HighWire-hosted journal article supplement (doi:10.1101/gr.268441.120), 2021-06-24
Supplement: Supplemental_table_S7.xlsx [file Supplemental_table_S7.xlsx]

## Sheet: Sheet 1
Supplemental Table S7			Structural variants affecting the Notch locus
		SV calls around the Notch genomic region, listed by sample and caller (delly, lumpy, novobreak, Control-Freec or CNV-Seq). The location of the breakpoints and length of the SV is listed, along with allele frequency.
sample	source	type	chromosome1	bp1	chromosome2	bp2	split_reads	disc_reads	genotype	length.Kb.	position	allele_frequency	log2.cnv.	microhomology	inserted_seq	consensus	mechanism	bp1_locus	bp2_locus	affected_genes
P17	delly	DEL	X	3146220	X	3148372	31	29	somatic_tumour	2.2	X:3146220-3148372	0.92	-2.14	-	-	GATTTGCACTATATTATATATCTGTTGGATTTGTGGCATTTGTCTATTTTCTTGCAGCCTTCAGTCTGCGGTCTCCAGTCTGCAGTTTTTTTTTTCGGCCTGCAGTCTTCT	-	N, intron	N, intron	N
P17	lumpy	DEL	X	3146220	X	3148372	31	29	somatic_tumour	2.2	X:3146220-3148372	0.92	-2.14	-	-	-	-	N, intron	N, intron	N
P17	novobreak	DEL	X	3146220	X	3148372	31	29	somatic_tumour	2.2	X:3146220-3148372	0.92	-2.14	-	-	CAAAAGTTGGAAAGATATCGAATGTTTGCAGATTTGCACTATATTATATATCTGTTGGATTTGTGGCATTTGTCTATTTTCTTGCAGCCTTCAGTCTGCGGTCTCCAGTCTGCAGTTTTTTTTTTCGGCCTGCAGTCTTCTCTGCTGCGAATCGTATCAAAACGGGCTCGTTGTCGAGCGACATTCCTGGCAAATCGGTTTGAACCTAAACGAGAGTCTGGGAGTCTCTGGTTCGTGCCTTTAGCC	-	N, intron	N, intron	N
P19	novobreak	COMPLEX_BND	X	3057935	X	3299323	7	12	somatic_tumour	241.4	X:3057935-3299323	0.38	0.11	-	-	CTTAAAAATAATCACAAACTCTTTCGATAATCGGACTCCTGAAATTTCTTGGTGCACCCAGGCATAAATCTTGATTAACACGAGAGCGACAAACGACACTGATACACAAAAAACCAAATGAGCCGATGATAAATACAGAGTCGCGGCATTAAGATATAACAATACATCCCAAGATGGAAGACGCATAGAGGCGCCCCAGCTCGCTCTCTAAAATTTAAATGAAATTAGCGCAAGCAGCTATCGCATCGAATTAATCAAAACTTTTGAGTTATCCAATTAGCGCGCGTCGAAAAGTTTATCACCTAGCCCATAACATAACCTCAAACCTCTTAACCCCTCGTCGCCCCAATCGGATTCCCCTA	-	kirre, intron	dnc, intron	kirre, N, dnc
P19	lumpy	COMPLEX_BND	X	3057935	X	3299323	7	12	somatic_tumour	241.4	X:3057935-3299323	0.38	0.11	-	-	-	-	kirre, intron	dnc, intron	kirre, N, dnc
P19	novobreak	COMPLEX_BND	X	3057935	X	3299323	7	12	somatic_tumour	241.4	X:3057935-3299323	0.38	0.11	-	-	GATAAATACAGAGTCGCGGCATTAAGATATAACAATACATCCCAAGATGGAAGACGCATAGAGGCGCCCCAGCTCGCTCTCTAAAATTTAAATGAAATTAGCGCAAGCAGCTATCGCATCGAATTAATCAAAACTTTTGAGTTATCCAATTAGCGCGCGTCGAAAAGTTTATCACCTAGCCCATAACATAACC	-	kirre, intron	dnc, intron	kirre, N, dnc
P7	novobreak	TRA	3R	2877391	X	3167258	3	0	somatic_tumour	289.9	3R:2877391 X:3167258	0.14	0	-	-	GGTATAACCAGCTCACCGATAAGGCGCAGTCCAAGCCAAACGCAGAGCATCGAAAAAATGGTGGATATTAATAAGGTTGAGGCTAGGGCGTCAATGGGCGGTGTCCTGAGGCTTTACGCGGCTGACGCTAGAACATTTCGGCCTGCCACTACGATGGTCACGATTGCGAACGGA	-	Pzl, intron	N, exon_6	Pzl, N
P7	Control-Freec	DEL	X	2992960	X	3136240	-	-	somatic_tumour	143.3	X:2992960-3136240	0.95	-3.36	-	-	-	-	kirre, intron	N, intron	kirre, CG4116, N
P7	novobreak	DEL	X	2993986	X	3135245	4	5	somatic_tumour	141.3	X:2993986-3135245	1	-3.4	-	-	CATATAGACAGATTCCAAGTGTCCCCCAGTCTCCGAAAACCAAAACCAAATCCAAATCCAAATCCAAAGCCAAAGCCAAAAACCAAAACTTCCCAAATACATTTCAATTTGTGCGGCTATGGCGATAAGTCCAAGTTTATCCTGTGGCAAACTGGAAGCGCAAGAGGAAGAGAGCAAGAGTGCGGCGTCGGTTTGAATTTGAATTTGTGGCTCGATCCTCGCGAAGAGA	-	kirre, intron	N, 5UTR	kirre, CG4116, N
P7	CNV-Seq	DEL	X	2994440	X	3135403	-	-	somatic_tumour	140	X:2994440-3135403	0.96	-3.4	-	-	-	-	kirre, intron	N, 5UTR	kirre, CG4116, N
P9	novobreak	DEL	X	3135326	X	3139096	15	8	somatic_tumour	3.8	X:3135326-3139096	0.74	-1.2	A	GA	GTATCTACCTCGAGTCGCGCGTGTGTGAGAGTGAGACGAAAGCCGAGTGCAAGAAGCGCAAGAGGAAGAGAGCAAGAGTGCGGCGTCGGTTTGAATTTGAATTTGTGGCTCGATCCTCGCGAAGAGATATGAAATCGGCTAATTTCTCAAGTGTTAAATCTGCTGTTACTCCTTGCCTTTCGCTTGGCCAAAATAAAAAAAAAAACAAAACCTGTAAG	Alt-EJ	N, 5UTR	N, intron	N
P9	lumpy	DEL	X	3135326	X	3139096	15	8	somatic_tumour	3.8	X:3135326-3139096	0.74	-1.2	A	GA	-	Alt-EJ	N, 5UTR	N, intron	N
P11	lumpy	DEL	X	3117762	X	3177111	2	2	somatic_tumour	59.3	X:3117762-3177111	0.26	-0.82	-	-	-	-	kirre, intron	dnc, intron	kirre, N, CG18508, Fcp3C, CG3939, dnc
P11	Control-Freec	DEL	X	3117915	X	3274245	-	-	somatic_tumour	156.3	X:3117915-3274245	0.63	-0.68	-	-	-	-	kirre, intron	dnc, intron	kirre, N, CG18508, Fcp3C, CG3939, CG14265, ng2, ng3, ng1, ng4, Pig1, Sgs4, dnc
P11	novobreak	DEL	X	3189060	X	3273846	13	14	somatic_tumour	84.8	X:3189060-3273846	0.63	-0.62	-	-	GATGGAATCGCACTGAGCGTTTATTTTTCGAATTCATTATCATATGATGTTTTGATGTTTAAATATTGCTCGATTTATATGGATAGTTTATGTTGCTTCAGCGATATTTCAAGGAAATGTGCACTTTTTTTTGCCTTTTGAGATATGAACAAATCACGTAGGCTTAAACTTCTATTTGTTGACGTGATCTTTTTGATTTGCTTTAGTTATAATTAAGATTTGTCCGCTTCGTGATTTGCCATTTCCTTTGCTTAGTTTTCTCTCACGTTTCACGACGTTTTCGCTTTCCATTTTCATTTCCATGAAATTTCTAGCATTCCTTTGCGGCTTTTTGTGGTGTTCACTGTACCTGTCCTAACGGAACAATTTGCCACAATAGCTG	-	dnc, intron	dnc, intron	dnc, CG14265, ng2, ng3, ng1, ng4, Pig1, Sgs4
P11	lumpy	DEL	X	3189060	X	3273846	13	14	somatic_tumour	84.8	X:3189060-3273846	0.63	-0.62	-	-	-	-	dnc, intron	dnc, intron	dnc, CG14265, ng2, ng3, ng1, ng4, Pig1, Sgs4
P11	novobreak	DEL	X	3189060	X	3273846	13	14	somatic_tumour	84.8	X:3189060-3273846	0.63	-0.62	-	-	TAATTAAGATTTGTCCGCTTCGTGATTTGCCATTTCCTTTGCTTAGTTTTCTCTCACGTTTCACGACGTTTTCGCTTTCCATTTTCATTTCCATGAAATTTCTAGCATTCCTTTGCGGCTTTTTGTGGTGTTCACTGTACCTGTCCTAACGGAACAATTTGCCACAATAGCTGCGACCCGTGCTCACTC	-	dnc, intron	dnc, intron	dnc, CG14265, ng2, ng3, ng1, ng4, Pig1, Sgs4
P23	CNV-Seq	DEL	X	2796789	X	3312289	-	-	somatic_tumour	515	X:2796789-3312289	0.75	-1.04	-		-	-	kirre, intron	dnc, intron	kirre, CG12498, CG14416, CG14417, CG14418, CG14419, CG3526, CG3588, CG14424, CG32793, CG3592, CG3598, CG14420, CG14421, CG14422, CG14423, CG17959, CG3603, rst, CG4116, N, CG18508, Fcp3C, CG3939, CG14265, ng2, ng3, ng1, ng4, Pig1, Sgs4, dnc
P25	CNV-Seq	DEL	X	3060852	X	3177592	-	-	somatic_tumour	116	X:3060852-3177592	0.85	-1.07	-	-	-	-	kirre, intron	dnc, intron	kirre, CG4116, N, CG18508, Fcp3C, CG3939, dnc
P25	Control-Freec	DEL	X	3061056	X	3201712	-	-	somatic_tumour	140.7	X:3061056-3201712	0.84	-1.03	-	-	-	-	kirre, intron	dnc, intron	kirre, CG4116, N, CG18508, Fcp3C, CG3939, dnc
P27	CNV-Seq	COMPLEX_DEL	X	3057571	X	3277390	-	-	somatic_tumour	219.8	X:3057571-3277390	0.26	-0.12	-	-		-	kirre, intron	dnc, intron	kirre, N, dnc
P27	delly	COMPLEX_BND	X	3057571	X	3277389	9	5	somatic_tumour	219.8	X:3057571-3277389	0.24	-0.12	-	-	GGTTGTTTTCTTCCTTTTGCTCCGTGAGTGTGTCATAATTTACAACAGTTGCTGGCCAAGTTGCGATTAGATTACACTTTCCATTTCCTGCAAATTGTATCAAAAATGCAGGTACACATGTCAACATCATTAGCCATATATCAACTTCACTTTCAATGCCTGCCCAATGAATTTCCTTAGCAGGCGGC	-	kirre, intron	dnc, intron	kirre, dnc
P27	lumpy	COMPLEX_BND	X	3057571	X	3277389	9	5	somatic_tumour	219.8	X:3057571-3277389	0.24	-0.12	-	-	-	-	kirre, intron	dnc, intron	kirre, dnc
P27	novobreak	COMPLEX_BND	X	3057571	X	3277389	9	5	somatic_tumour	219.8	X:3057571-3277389	0.24	-0.12	-	-	TTTTCTTCCTTTTGCTCCGTGAGTGTGTCATAATTTACAACAGTTGCTGGCCAAGTTGCGATTAGATTACACTTTCCATTTCCTGCAAATTGTATCAAAAATGCAGGTACACATGTCAACATCATTAGCCATATATCAACTTCACTTTCAATGCCTGCCCAATGAATTTCCTTAGCAGGCGGCGTGATAAAAAAAAATAAAAGGCAGGCCGATGA	-	kirre, intron	dnc, intron	kirre, dnc
P29	CNV-Seq	DEL	X	3145469	X	3148044	-	-	somatic_tumour	2.6	X:3145469-3148044	0.85	-1.59	-	-	-	-	N, intron	N, exon_2	N
P29	Control-Freec	DEL	X	3145925	X	3148700	-	-	somatic_tumour	2.8	X:3145925-3148700	0.84	-1.6	-	-	-	-	N, intron	N, intron	N
P31	novobreak	COMPLEX_TRA	Tomelloso	29478	X	3098320	12	0	somatic_tumour	3068.8	Tomelloso:29478 X:3098320	1	0	TA	-	TTGTAGGTGTAAAAGCTGATTGTTGGGCGGCCTCATCAATAATTGCATTCACACTTGCCTTGTTTTTAAAAACATAATGTGAGTTAATGTTTTAGACACCAAATGACATAAAACTATATATGTATTAAAGCACTGCT	Alt-EJ	intergenic	kirre, intron	kirre
P31	novobreak	COMPLEX_TRA	Tomelloso	44579	X	3135040	28	0	somatic_tumour	3090.5	Tomelloso:44579 X:3135040	1	0	-	-	GGTATAATCAAACGACATGCTTCGCCCGGTATAATTGTCTCATCGGCCGAATCGGCATACGACAAAATGACACAGCAAGCAAATGCAATGAAATGAAAAGGATGGCCCCAGCGGGAAAGCCGTTCAGCAAGAGCAAGGAGTGCCTGTCGCAGGGATAGCAACGAGAGAGCGACACAGAGAGCGAGAGAGAGAGAGGGAG	NHEJ	intergenic	N, 5UTR	N
P31	CNV-Seq	COMPLEX_DUP	X	3098318	X	3125700	-	-	somatic_tumour	27	X:3098318-3125700	0.92	0.86	-	-	-	-	kirre, intron	kirre, intron	kirre
P31	Control-Freec	COMPLEX_DUP	X	3098720	X	3125870	-	-	somatic_tumour	27.1	X:3098720-3125870	0.92	0.85	-	-	-	-	kirre, intron	kirre, intron	kirre
P31	lumpy	COMPLEX_BND	X	3125694	X	3126976	9	3	somatic_tumour	1.3	X:3125694-3126976	0.48	-0.13	-	CCGTGTG,TGTC	-	FoSTeS	kirre, intron	kirre, intron	kirre
P31	novobreak	COMPLEX_BND	X	3125694	X	3126976	9	3	somatic_tumour	1.3	X:3125694-3126976	0.48	-0.13	-	CCGTGTG,TGTC	TTTTTTTTCAACCGTCTCTATGACACTGCACTTGTGTGGGTGTAGGTGTGTCTGTGCCGTGTGTCCGGCAGTGTGTGGCAGGACCCCATGGGTCCTTCGGCCAAAGT	FoSTeS	kirre, intron	kirre, intron	kirre
P31	novobreak	COMPLEX_BND	X	3125694	X	3126976	9	3	somatic_tumour	1.3	X:3125694-3126976	0.48	-0.13	-	CCGTGTG,TGTC	GTGTGGGGTCTAGAGACTATCGGGGAAGTGGTTTTTACTATCCAACGAGAATCTACCGCAACTAAAAACAAAAGTTATGTGTGCACGAAAAATCATGTCCAGTCATTTCCTGTACAACTTTGGCCGAAGGACCCATGGGGTCCTGCCACACACTGCCGGACACACGGCACAGACACACCTACACCCACACAAGTGCAGTGTCATAGAGACGGTTGAAAAAAAAAAAGAAGGAAAAGGAAAAGGAA	FoSTeS	kirre, intron	kirre, intron	kirre
P31	delly	COMPLEX_BND	X	3125694	X	3126976	9	3	somatic_tumour	1.3	X:3125694-3126976	0.48	-0.13	-	CCGTGTG,TGTC	TCCTGGTTTTCCTTTTCCTTTTCCTTCTTTTTTTTTTTCAACCGTCTCTATGACACTGCACTTGTGTGGGTGTAGGTGTGTCTGTGCCGTGTGTCCGGCAGTGTGTGGCAGGACCCCATGGGTCCTTCGGCCAAAGTTGTACAG	FoSTeS	kirre, intron	kirre, intron	kirre
P31	Control-Freec	COMPLEX_DEL	X	3125870	X	3134920	-	-	somatic_tumour	9.1	X:3125870-3134920	0.77	-1.3	-	-	-	-	kirre, intron	N, 5UTR	kirre, N
P31	CNV-Seq	COMPLEX_DEL	X	3126976	X	3135039	-	-	somatic_tumour	8	X:3126976-3135039	0.81	-1.46	-	-	-	-	kirre, intron	N, 5UTR	kirre, N
P33	CNV-Seq	DEL	X	3160180	X	3207188	-	-	somatic_tumour	46	X:3160180-3207188	0.87	-1.57	-	-	-	-	N, intron	dnc, intron	N, CG18508, Fcp3C, CG3939, dnc
P33	Control-Freec	DEL	X	3160388	X	3207446	-	-	somatic_tumour	47.1	X:3160388-3207446	0.87	-1.56	-	-	-	-	N, intron	dnc, intron	N, CG18508, Fcp3C, CG3939, dnc
P35	novobreak	TRA	3R	31063194	X	3136742	11	9	somatic_tumour	27926.5	3R:31063194 X:3136742	0.6	0	-	-	TTTGGTTTCGTTTAGCAGTCGGCTTGAAGATTTTTGTATTTCCTTTTTTGCTCGTCGGCGGCTTAGATCAAATAATGCGATTTCATGGCAAGTTCACCAGGGGACTGGAAAAACTCGCCTTTTGCCGACGGTAAAAACGGTCTTTCTTGTTTCGAAAAGGTGGGTTTCCAAATCTGAGAGAGCATGCGCAGTCGG	-	intergenic	N, intron	N
P35	delly	TRA	X	3136742	3R	31063202	13	0	somatic_tumour	27926.5	X:3136742 3R:31063202	0.44	0	-	-	CTCTCAGATTTGGAAACCCACCTTTTCGAAACAAGAAAGACCGTTTTTACCGTCGGCAAAAGGCGAGTTTTTCCAGTCCCCTGGTGAACTTGCCATGAAATCGCATTATTTGATCTAAGCCGCCGACGAGCAAAAAAGGAAATACAAAAATC	-	N, intron	intergenic	N
P37	Control-Freec	COMPLEX_DEL	2L	13540608	2L	13572096	-	-	somatic_tumour	31.5	2L:13540608-13572096	0.27	-0.51	-	-	-	-	B4, intron	kuz, intron	B4, CG16852, CG9263, CG16853, kuz
P37	novobreak	COMPLEX_BND	2L	13540579	2L	13587180	7	3	somatic_tumour	46.6	2L:13540579-13587180	0.1	-0.17	-	AATTGCATGCATGGGTAAGGTTGC	GTCATAATTGTCATATTAGACAGGAAAATCCATAGACGACAGTCGACCCTGAAGTGTCGATGGACAGCAGCTTCTGGTTTTGCCCGGCCAGACAGGAAAGGAAATTGCAATTGCATGCATGGGTAAGGTTGCATGTTTTTTCTTTGTTAATTTACACATACGTGTGATATATTGCTTGTGGGTTTAACAGAAAGGCGTTGACTGTGTAAGTACTGACTGAAG	FoSTeS	B4, intron	kuz, intron	B4, kuz
P39	Control-Freec	DEL	X	3120000	X	3194400	-	-	somatic_tumour	74.4	X:3120000-3194400	0.77	-0.98	-	-	-	-	kirre, intron	dnc, intron	kirre, N, CG18508, Fcp3C, CG3939, dnc
P39	CNV-Seq	DEL	X	3120718	X	3194680	-	-	somatic_tumour	73	X:3120718-3194680	0.77	-0.99	-	-	-	-	kirre, intron	dnc, intron	kirre, N, CG18508, Fcp3C, CG3939, dnc
P41	Control-Freec	DEL	X	3033408	X	3135528	-	-	somatic_tumour	102.1	X:3033408-3135528	0.88	-1.63	-	-	-	-	kirre, intron	N, 5UTR	kirre, CG4116, N
P41	lumpy	DEL	X	3033491	X	3135340	16	13	somatic_tumour	101.8	X:3033491-3135340	0.78	-1.63	-	ACACTCC	-	FoSTeS	kirre, intron	N, 5UTR	kirre, CG4116, N
P41	novobreak	DEL	X	3033491	X	3135340	16	13	somatic_tumour	101.8	X:3033491-3135340	0.78	-1.63	-	ACACTCC	TTCCTACCCGAATATCTCTCGTATTTTCTCCACGCCCCACCATTCTCCTTGCCAATTCAACAAAAAACTGTCAACGCTGCTGTCGTCTGACTTTGTTTTCTCATTAGACAGTTGCCCTCGTGTTGTTTTTCCACTCGGAGCGCATTTCATAATTGTCAGCCCGCCCAGAAAAGCCGTCCAATAAAAGTCCAGATCTAGATTCAGATTCGGTTCCGGTACACTCCGATACACGAAAAGCGTTCTTTTTTTGCCACTTTTTTTTTATGTTTCAAAACGGAAAATGTCGCCGTCGTCGGGAGAGTGCCTCCTCTTAGTTTATCA	FoSTeS	kirre, intron	N, 5UTR	kirre, CG4116, N
P41	delly	DEL	X	3033491	X	3135340	16	13	somatic_tumour	101.8	X:3033491-3135340	0.78	-1.63	-	ACACTCC	TTTCATAATTGTCAGCCCGCCCAGAAAAGCCGTCCAATAAAAGTCCAGATCTAGATTCAGATTCGGTTCCGGTACACTCCGATACACGAAAAGCGTTCTTTTTTTGCCACTTTTTTTTTATGTTTCAAAACGGAAAATGTC	FoSTeS	kirre, intron	N, 5UTR	kirre, CG4116, N
P43	CNV-Seq	COMPLEX_DEL	X	3157127	X	3158876	-	-	somatic_tumour	1.8	X:3157127-3158876	0.91	-2.14	-	-	-	-	N, intron	N, intron	N
P43	delly	COMPLEX_BND	X	3159064	X	3390026	19	19	somatic_tumour	231	X:3159064-3390026	0.7	-0.01	-	-	CCTTTCCCGTGTAGCCCGTGGGACACATGCACCTAGAACAGAAGCGAGAGGAGCAATTAAACGCGGGTTAAACGCGGCTGTTAATTGTTTGGATATATTTTTTAAGCATCACATAAAGTTTTCTGTTGGGT	-	N, intron	CG12535, 3UTR	N, Myc, CR44999, CG12535
P43	lumpy	COMPLEX_BND	X	3159064	X	3390026	19	19	somatic_tumour	231	X:3159064-3390026	0.7	-0.01	-	-	-	-	N, intron	CG12535, 3UTR	N, Myc, CR44999, CG12535
P43	novobreak	COMPLEX_BND	X	3159064	X	3390026	19	19	somatic_tumour	231	X:3159064-3390026	0.7	-0.01	-	-	GTGTGTGTGTGTGTGTGTGAATTTGCCGGCTACTTCTGCCATTCGTGTACCCTTTCTATTTAACGCGGTATCCCCACTGTCATAATAAACTGCAAATTAAGTTTAATTCATCTGTTTTAGCTCTCCATTTTAAACTTTTAAACTTAAACGACCCAACAGAAAACTTTATGTGATGCTTAAAAAATATATCCAAACAATTAACAGCCGCGTTTAACCCGCGTTTAATTGCTCCTCTCGCTTCTGTTCTAGGTGCATGTGTCCCACGGGCTACACGGGAAAGGATTGCGACACCAAGTACAAGCCCTGCTCGCCATCGCCGTGCCAGAATGGCGGAATTTGCCGGTCGAACGGTCTGTCCTACGAGTGCAAGTGCCCCAAAGGTGAGTGCTAGTTATTAAG…	-	N, intron	CG12535, 3UTR	N, Myc, CR44999, CG12535
P43	CNV-Seq	COMPLEX_DUP	X	3392440	X	3393763	-	-	somatic_tumour	1.3	X:3392440-3393763	0.89	0.61	-	-	-	-	CG12535, 3UTR	CG12535, intron	CR44999, CG12535
P45a	CNV-Seq	COMPLEX_DEL	X	3005994	X	3239110	-	-	somatic_tumour	232	X:3005994-3239110	0.74	-0.64	-	-	-	-	kirre, intron	dnc, intron	kirre, CG4116, N, CG18508, Fcp3C, CG3939, CG14265, dnc
P45a	novobreak	COMPLEX_BND	X	3006006	X	3322256	5	3	somatic_tumour	316.2	X:3006006-3322256	0.21	-0.44	-	-	CTGACAGGGGAAGAGGGCCCTCCAAAGAGCCAGCTAAATTCGAAACGCACACAGAGGCGAAAAGTGCAACAACTTTGCTGGCATTTTAGGCTCCTACATATTTTTGAAAATAATCCTTTCTTACTGCCCGACTAGCTGAAATATGAAATATTGAATAGAAAAGGTACAAGT	-	kirre, intron	CR44886, ncRNA	kirre, CG4116, N, CG18508, Fcp3C, CG3939, CG14265, ng2, ng3, ng1, ng4, Pig1, Sgs4, CG10793, dnc, CR44886
P49	Control-Freec	DEL	X	2982420	X	3191076	-	-	somatic_tumour	208.7	X:2982420-3191076	0.85	-1.65	-	-	-	-	kirre, intron	dnc, intron	kirre, CG4116, N, CG18508, Fcp3C, CG3939, dnc
P49	novobreak	DEL	X	2982553	X	3192604	3	2	somatic_tumour	210.1	X:2982553-3192604	0.24	-1.64	-	-	TTTCCAACTTGCCTGTTGAGTAATTCTACGAAAGATCGTCTCCGTCTGGGAATTGGGTTTCCCTGCTAAATTTTTTTGCTTTCCCTAACAAAAAAAAAAAATAAACAAACCCGTGAGTAGTTGGCTTCAAAAGGTATGCACCTTTTTACGGGAACTTACGCTAAATAT	NHEJ	kirre, intron	dnc, intron	kirre, CG4116, N, CG18508, Fcp3C, CG3939, dnc
P53	Control-Freec	DEL	X	3139251	X	3200115	-	-	somatic_tumour	60.9	X:3139251-3200115	0.9	-2.07	-	-	-	-	N, intron	dnc, intron	N, CG18508, Fcp3C, CG3939, dnc
P53	CNV-Seq	DEL	X	3139518	X	3200151	-	-	somatic_tumour	60	X:3139518-3200151	0.9	-2.08	-	-	-	-	N, intron	dnc, intron	N, CG18508, Fcp3C, CG3939, dnc
P55	lumpy	DEL	X	3161667	X	3165215	12	28	somatic_tumour	3.5	X:3161667-3165215	0.92	-2.6	-	-	-	NHEJ	N, intron	N, exon_6	N
P57	CNV-Seq	DEL	X	3134274	X	3140118	-	-	somatic_tumour	5.8	X:3134274-3140118	0.86	-1.85	-	-	-	-	kirre, 3UTR	N, intron	kirre, N
P57	Control-Freec	DEL	X	3134430	X	3140605	-	-	somatic_tumour	6.2	X:3134430-3140605	0.85	-1.75	-	-	-	-	kirre, 3UTR	N, intron	kirre, N
P59	lumpy	BND	X	3084863	X	3143771	5	3	somatic_tumour	58.9	X:3084863-3143771	0.2	0.41	-	-	-	-	kirre, intron	N, intron	kirre, N
P59	novobreak	BND	X	3084863	X	3143771	5	3	somatic_tumour	58.9	X:3084863-3143771	0.2	0.41	-	-	AAGGTAAACTCTTCTTTAGTTGCAAGTTGTATACTTTTTTGTGTTATATTTAAGTGCAAGCTATCGAGAGGAGGAGTTCATTGACCCATAATCCTAGTTTTTTTTTTTTGTTGCTAAATTGAAAAGCATAGAGAAGGCAACGTAATGACCGCTGATGATGAGGTGTTTATGACCGCGGCCAGGTATCTCGAATATTTTGCATTAGTCACGCTTATTGTCTTCAGCCGAAACGGGGGCGTTTCTTGGCATTCGGTTATGGGTTATATGTGTATATAACTATAGGGCTTTATAGGTCGCGGATCGGCATTGCCCCTTTGTCTTTGCGCCGCATTTCCCGCCGTTTCGAACTCGGCGGCAGTCATTAGACACACAGCGAAACCGCTACAAAATCGAACCGCA…	-	kirre, intron	N, intron	kirre, N
P59	delly	BND	X	3084863	X	3143771	5	3	somatic_tumour	58.9	X:3084863-3143771	0.2	0.41	-	-	TCGAGATACCTGGCCGCGGTCATAAACACCTCATCATCAGCGGTCATTACGTTGCCTTCTCTATGCTTTTCAATTTAGCAACAAAAAAAAAAAACTAGGATTATGGG	-	kirre, intron	N, intron	kirre, N
P59	novobreak	BND	X	3138400	X	3196544	4	3	somatic_tumour	58.1	X:3138400-3196544	0.2	0.14	-	-	TTTTTATTTCCATTAAATTTGGTTGCAACTTTATGTGGATGATCCATTCCGACCATAAAGTGCACACTTTACGATCCATATTATGTACATATTTATACTCGGTACTGTAAGCATACCTTTTTGTGAGCTTCAACTTATTAAACTTTTTAATTTCCATTTAAAC	-	N, intron	dnc, intron	N, dnc
P61	delly	DEL	X	3067156	X	3159711	9	16	somatic_tumour	92.6	X:3067156-3159711	0.98	-2.7	-	-	GCTCCATTGGAAGTCGTGGTGACCAGGCCAGTTCCGGTTCCCGAAGTCGTTCCTGTTGTTCCCGTCGATGAAGTAGCTGCCACAAGGGGCAAACTCGTTTGTCAGCTAAGAAAAACCCCTTTGCCGACTCGACCGGCCCAGCATCATTCATC	-	CG4116, exon	N, intron	kirre, CG4116, N
P61	lumpy	DEL	X	3067156	X	3159711	9	16	somatic_tumour	92.6	X:3067156-3159711	0.98	-2.7	-	-	-	-	CG4116, exon	N, intron	kirre, CG4116, N
P61	novobreak	DEL	X	3067156	X	3159711	9	16	somatic_tumour	92.6	X:3067156-3159711	0.98	-2.7	-	-	GGTTCACATAGATAGCTCCATTGGAAGTCGTGGTGACCAGGCCAGTTCCGGTTCCCGAAGTCGTTCCTGTTGTTCCCGTCGATGAAGTAGCTGCCACAAGGGGCAAACTCGTTTGTCAGCTAAGAAAAACCCCTTTGCCGACTCGACCGGCCCAGCATCATTCATCAGTTTTTGAC	-	CG4116, exon	N, intron	kirre, CG4116, N
P61	Control-Freec	DEL	X	3067716	X	3160831	-	-	somatic_tumour	93.1	X:3067716-3160831	0.94	-2.67	-	-	-	-	kirre, intron	N, intron	kirre, N
P63	CNV-Seq	COMPLEX_DEL	X	3170682	X	3194381	-	-	somatic_tumour	23	X:3170682-3194381	0.96	-3.84	-	-	-	-	N, exon	dnc, intron	N, CG18508, Fcp3C, CG3939, dnc
P63	lumpy	COMPLEX_BND	X	3195652	X	3199676	25	5	somatic_tumour	4	X:3195652-3199676	0.24	1.64	-	TATGAAATCCTA	-	FoSTeS	dnc, intron	dnc, intron	dnc
P63	novobreak	COMPLEX_BND	X	3195652	X	3199676	25	5	somatic_tumour	4	X:3195652-3199676	0.24	1.64	-	TATGAAATCCTA	GTAAACATTTTAAATTGCAATAGGAAAATATTTTTAGCCCTCCTATTTAACCCCTTGAAGGCCCATTGCCTCCTTAACCCCTATGTGTTCCTCTTGTTGACACTTGGCTGGATGAAGATGCACATTTTGTGGCTTAGTTGAAGCTTAGTGCTGAGTTATGTTAGGATTTCATATAATAGGATTCATATACATAAACTTGATGATATGGTATAAGTGCTTTTGCCTCTTCAATGGTCCTTCAATGGTATCAGTAGCCCCGGGATTTTGCCGCCTGGATGATGGCCTTGTATTTTGGGACACAGATTTACCATGCCACATTTTCCGCCATCCTGTTTAGTCC	FoSTeS	dnc, intron	dnc, intron	dnc
P63	Control-Freec	COMPLEX_DUP	X	3196026	X	3199350	-	-	somatic_tumour	3.3	X:3196026-3199350	0.8	1.6	-	-	-	-	dnc, intron	dnc, intron	dnc
P65	delly	DEL	X	3162637	X	3165495	2	8	somatic_tumour	2.9	X:3162637-3165495	0.35	-1.24	-	-	CTGTTGTGCGAGTGAGAACGGTGGAACCTGTCTGGATGG	NHEJ	N, intron	N, exon_6	N
P65	novobreak	DEL	X	3162637	X	3165495	2	8	somatic_tumour	2.9	X:3162637-3165495	0.35	-1.24	-	-	TATTACAACTGTTTGCTGTTCTGAAATCCAAGATAACAGCAAACTTTCTTTTATGCTGCCCTCTGTTGTGCGAGTGAGAACGGTGGAACCTGTCTGGATGGGATCGGTGACTATAGCTGCCTGTGCGTGGATGGCTTCGATGGCAAGCACTGCGAGACGGACATCAATGAGTGCTTGAGTCAGCCGTGCCAGAA	NHEJ	N, intron	N, exon_6	N
D1	Control-Freec	DEL	X	2785056	X	3337404	-	-	somatic_tumour	552.3	X:2785056-3337404	0.61	-0.63	-	-	-	-	CG32795, exon_4	CR44886, ncRNA	kirre, CG32795, w, CG12498, CG14416, CG14417, CG14418, CG14419, CG3526, CG3588, CG14424, CG32793, CG3592, CG3598, CG14420, CG14421, CG14422, CG14423, CG17959, CG3603, rst, CG4116, N, CG18508, Fcp3C, CG3939, CG14265, ng2, ng3, ng1, ng4, Pig1, Sgs4, CG10793, dnc, CR44886
D1	lumpy	DEL	X	2785301	X	3336717	4	1	somatic_tumour	551.4	X:2785301-3336717	0.21	-0.63	-	-	-	-	CG32795, intron	CR44886, ncRNA	kirre, CG32795, w, CG12498, CG14416, CG14417, CG14418, CG14419, CG3526, CG3588, CG14424, CG32793, CG3592, CG3598, CG14420, CG14421, CG14422, CG14423, CG17959, CG3603, rst, CG4116, N, CG18508, Fcp3C, CG3939, CG14265, ng2, ng3, ng1, ng4, Pig1, Sgs4, CG10793, dnc, CR44886
D1	novobreak	DEL	X	2785301	X	3336717	4	1	somatic_tumour	551.4	X:2785301-3336717	0.21	-0.63	-	-	GGATCGGGTGGGCCAATATACACTTTGCGTCATCGAATACAGATAAGATTACTTTCTCATAAATTGAGTGTAAAGATAATTTGGAATTTGAAATGAATATTAATTTATGCACAGGCAATTTGAATTTGAATTTGCTCTCCATGCCACAAACAGCGACAAACAAACAAAAACAAAAACAAAAGCAAAAACAATTGGGCTGCGAGGGTTTAAGGGCTGCGGCCCCAAAA	-	CG32795, intron	CR44886, ncRNA	kirre, CG32795, w, CG12498, CG14416, CG14417, CG14418, CG14419, CG3526, CG3588, CG14424, CG32793, CG3592, CG3598, CG14420, CG14421, CG14422, CG14423, CG17959, CG3603, rst, CG4116, N, CG18508, Fcp3C, CG3939, CG14265, ng2, ng3, ng1, ng4, Pig1, Sgs4, CG10793, dnc, CR44886
D1	novobreak	DEL	X	3134156	X	3136185	9	2	somatic_tumour	2	X:3134156-3136185	0.65	-1.56	-	-	TTCACTAAGCCAATACTGTAATTAATTAACTAATTTATTGTTTCATATTTTATTTTTTGTTTCTTTCGAGAATATACATATGTATGTATTTATCTAAAGTAATTCTGAAAATGCTTAAAAATAATGCCCGTTCGTTTAAACTTGCATAGCTAGGAAATGTTGGTCTATAAAATCGGATGCATTCGCAACACATATAAGTGACTGAGCAAATCCATGCAACTGTAATCCAAAAAGGAAGTGGTGCTACTTAATCTGCTTAATAAGCCCATAGGATTGTTGCAAATC	-	kirre, 3UTR	N, intron	kirre, N
D3	Control-Freec	DEL	X	3090477	X	3154453	-	-	somatic_tumour	64	X:3090477-3154453	0.72	-0.82	-	-	-	-	kirre, intron	N, intron	kirre, N
D7	Control-Freec	DEL	X	3158590	X	3162134	-	-	somatic_tumour	3.5	X:3158590-3162134	0.98	-2.83	-	-	-	-	N, intron	N, intron	N
D7	lumpy	DEL	X	3158734	X	3161854	10	1	somatic_tumour	3.1	X:3158734-3161854	0.59	-2.96	-	-	-	-	N, intron	N, intron	N
P1	CNV-Seq	DEL	X	2793253	X	3266169	-	-	somatic_tumour	472	X:2793253-3266169	0.9	-1.64	-	-	-	-	w, intron	dnc, intron	kirre, w, CG12498, CG14416, CG14417, CG14418, CG14419, CG3526, CG3588, CG14424, CG32793, CG3592, CG3598, CG14420, CG14421, CG14422, CG14423, CG17959, CG3603, rst, CG4116, N, CG18508, Fcp3C, CG3939, CG14265, ng2, ng3, ng1, ng4, Pig1, Sgs4, dnc
P1	Control-Freec	DEL	X	2794000	X	3266000	-	-	somatic_tumour	472	X:2794000-3266000	0.9	-1.64	-	-	-	-	w, intron	dnc, intron	kirre, w, CG12498, CG14416, CG14417, CG14418, CG14419, CG3526, CG3588, CG14424, CG32793, CG3592, CG3598, CG14420, CG14421, CG14422, CG14423, CG17959, CG3603, rst, CG4116, N, CG18508, Fcp3C, CG3939, CG14265, ng2, ng3, ng1, ng4, Pig1, Sgs4, dnc
P3	CNV-Seq	COMPLEX_DEL	X	3169736	X	3199425	-	-	somatic_tumour	30	X:3169736-3199425	0.95	-3.05	-	-	-	-	N, exon_7	dnc, intron	N, CG18508, Fcp3C, CG3939, dnc
P3	CNV-Seq	COMPLEX_DUP	X	3199425	X	3215747	-	-	somatic_tumour	30	X:3199425-3215747	0.89	0.81	-	-	-	-	dnc, intron	dnc, intron	dnc
P3	lumpy	COMPLEX_BND	X	3199427	X	3200763	6	1	somatic_tumour	1.3	X:3199427-3200763	0.54	0.24	-	GTATACATGCAATATGATATGATAACACA	-	FoSTeS	dnc, intron	dnc, intron	dnc
P5	delly	COMPLEX_BND	X	3129531	X	3364620	3	1	somatic_tumour	235.1	X:3129531-3364620	0.28	-2.84	C	-	GCGGCAGCATCGTCAGCGAATGATGAAAGCAAACCGAAGGGCGGCGACAATGGTGGTCAGCACTTTGCGAATGTTGCGAATGTGGAGGGCAAAAGAAAGAATGCCAAATAAATTAAAATATTACA	Alt-EJ	kirre, exon_9	intergenic	kirre, N, CG18508, Fcp3C, CG3939, dnc, CG14265, ng2, ng3, ng1, ng4, Pig1, Sgs4, CR44886, CG10793, CR46243
P5	lumpy	COMPLEX_BND	X	3129531	X	3364620	3	1	somatic_tumour	235.1	X:3129531-3364620	0.28	-2.84	C	-	-	Alt-EJ	kirre, exon_9	intergenic	kirre, N, CG18508, Fcp3C, CG3939, dnc, CG14265, ng2, ng3, ng1, ng4, Pig1, Sgs4, CR44886, CG10793, CR46243
P5	novobreak	COMPLEX_BND	X	3129531	X	3364620	3	1	somatic_tumour	235.1	X:3129531-3364620	0.28	-2.84	C	-	CTCCTCCTCATCCTCATCCTCGTCGAGTGGCTCCTCATCGGCGGCAGCATCGTCAGCGAATGATGAAAGCAAACCGAAGGGCGGCGACAATGGTGGTCAGCACTTTGCGAATGTTGCGAATGTGGAGGGCAAAAGAAAGAATGCCAAATAAATTAAAATATTACATCGCTGACCCTGAACCTCGTTTTTTTCGTATTGTTTTT	Alt-EJ	kirre, exon_9	intergenic	kirre, N, CG18508, Fcp3C, CG3939, dnc, CG14265, ng2, ng3, ng1, ng4, Pig1, Sgs4, CR44886, CG10793, CR46243
P5	CNV-Seq	COMPLEX_DEL	X	3129531	X	3364621	-	-	somatic_tumour	235.1	X:3129531-3364621	0.87	-2.84	-	-	-	-	kirre, exon_9	intergenic	kirre, N, CG18508, Fcp3C, CG3939, dnc, CG14265, ng2, ng3, ng1, ng4, Pig1, Sgs4, CR44886, CG10793, CR46243
P5	Control-Freec	COMPLEX_DEL	X	3129945	X	3164340	-	-	somatic_tumour	34.4	X:3129945-3164340	0.94	-3.07	-	-	-	-	kirre, exon_9	N, exon_6	kirre, N
P5	Control-Freec	COMPLEX_DEL	X	3171219	X	3352366	-	-	somatic_tumour	181.1	X:3171219-3352366	0.95	-3.18	-	-	-	-	N, 3UTR	intergenic	N, CG18508, Fcp3C, CG3939, dnc, CG14265, ng2, ng3, ng1, ng4, Pig1, Sgs4, CR44886, CG10793
P5	lumpy	COMPLEX_BND	X	3351890	X	3353248	10	0	somatic_tumour	1.4	X:3351890-3353248	0.87	-0.32	-	CTTTG	-	FoSTeS	intergenic	intergenic	-
P5	CNV-Seq	COMPLEX_DUP	X	3354465	X	3364533	-	-	somatic_tumour	10.1	X:3354465-3364533	0.92	0.89	-	-	-	-	intergenic	intergenic	CR46243
