# Supplementary material for: Evolution and genomic signatures of spontaneous somatic mutation in Drosophila intestinal stem cells
Source: HighWire-hosted journal article supplement (doi:10.1101/gr.268441.120), 2021-06-24
Supplement: Supplemental_table_S8.xlsx [file Supplemental_table_S8.xlsx]

## Sheet: Sheet1
Supplemental Table S8		Somatic structural variants throughout the genome
		SV calls throughout the genome listed by sample and caller (delly, lumpy, novobreak, Control-Freec or CNV-Seq). Length and adjusted allele frequency are noted.
sample	source	type	chromosome1	bp1	chromosome2	bp2	split_reads	disc_reads	genotype	length.Kb.	position	allele_frequency	log2.cnv.	microhomology	inserted_seq	consensus	mechanism	bp1_locus	bp2_locus	affected_genes
P17	novobreak	DEL	2R	6153193	2R	6153589	5	0	somatic_tumour	0.4	2R:6153193-6153589	0.05	0	GCCTCCGT	-	TTTATCGATAAAATTCTTAAAAACTGATCAATTTTACTTATTGATATAACAAGGTATGTAACTAGATATGAAATATCGAACTGGTTCCATAGCCTCCGTCAAGTGGCTGCTTTCACGAACGCCAATGCATTTTAGTGCCTAATTTCCAATAAATCACTGCCGTCGTTGACTTATAAGCTCCTTAAAGA	Alt-EJ	tRNA:Asn-GTT-1-2, tRNA	EcR, intron	EcR, tRNA:Asn-GTT-1-2
P17	lumpy	BND	2R	13505400	2R	13505470	1	4	somatic_tumour	0.1	2R:13505400-13505470	0.04	0	CGCAA	-	-	Alt-EJ	mars, exon	mars, exon	mars
P17	Control-Freec	DEL	2R	19515550	2R	19535125	-	-	somatic_tumour	19.6	2R:19515550-19535125	0.31	-0.53	-	-	-	-	intergenic	sm, intron	sm
P17	Control-Freec	DUP	3L	21427375	3L	21433900	-	-	somatic_tumour	6.5	3L:21427375-21433900	0.42	0.59	-	-	-	-	barc, intron	Aef1, exon_1	barc, CG33288, Aef1
P17	Control-Freec	DUP	3R	5733300	3R	5795650	-	-	somatic_tumour	62.4	3R:5733300-5795650	0.2	0.21	-	-	-	-	intergenic	CG10979, exon_3	CG10979
P17	Control-Freec	DUP	3R	18283050	3R	18292475	-	-	somatic_tumour	9.4	3R:18283050-18292475	0.38	0.51	-	-	-	-	CG14312, 3UTR	l(3)05822, intron	CG14312, CG8064, CG7131, l(3)05822
P17	delly	DEL	X	3146220	X	3148372	31	29	somatic_tumour	2.2	X:3146220-3148372	0.92	-2.14	-	-	GATTTGCACTATATTATATATCTGTTGGATTTGTGGCATTTGTCTATTTTCTTGCAGCCTTCAGTCTGCGGTCTCCAGTCTGCAGTTTTTTTTTTCGGCCTGCAGTCTTCT	-	N, intron	N, intron	N
P17	lumpy	DEL	X	3146220	X	3148372	31	29	somatic_tumour	2.2	X:3146220-3148372	0.92	-2.14	-	-	-	-	N, intron	N, intron	N
P17	novobreak	DEL	X	3146220	X	3148372	31	29	somatic_tumour	2.2	X:3146220-3148372	0.92	-2.14	-	-	CAAAAGTTGGAAAGATATCGAATGTTTGCAGATTTGCACTATATTATATATCTGTTGGATTTGTGGCATTTGTCTATTTTCTTGCAGCCTTCAGTCTGCGGTCTCCAGTCTGCAGTTTTTTTTTTCGGCCTGCAGTCTTCTCTGCTGCGAATCGTATCAAAACGGGCTCGTTGTCGAGCGACATTCCTGGCAAATCGGTTTGAACCTAAACGAGAGTCTGGGAGTCTCTGGTTCGTGCCTTTAGCC	-	N, intron	N, intron	N
P17	novobreak	BND	X	4954265	X	4954391	8	2	somatic_tumour	0.1	X:4954265-4954391	0.13	0	-	-	GCTCTTGCTTGGGTTTTTCTATCGCCTCCTGGAGAACCACATGCACGTCATGGGTGCTGCTGCTGCAGCTGGCCACGGAAGTTAAGCCAAAGGGTAGCAATGACGATGAAGAAGACGAAGAAGACGATGACGACGACGACGATGACCAG	-	Ptp4E, exon	Ptp4E, exon	Ptp4E
P17	novobreak	BND	X	9302146	X	9302259	5	1	somatic_tumour	0.1	X:9302146-9302259	0.16	0	GCTGCAGCTGGCC	-	AATCCATGGCCATGCATCTCGGGCAGCACCGCCGGCAGGTGGGCGGCAATGGAGCCACCATGGGCATGGGCATGGGAGTGGGAGTGGGCATGGGCATGAATCACTACGGCGGTGGCTA	Alt-EJ	lz, exon	lz, exon	lz
P17	novobreak	BND	X	10498521	X	10498657	3	0	somatic_tumour	0.1	X:10498521-10498657	0.04	0	GTGGGCGGCA	-	AGACATTCGCCAAGCGATTGTCGCCGGAGGGCGAGTGTAAGGACACGCTGTCCTCGCAGGGATCCTCTTCTAACGATAGTCGCTGGCCGCCGGCGTAGTAACCTCCACGAATTTTCCATTACCATTACCAACCGTCGGTCCACTACCGCCGCCACCTCCGTTCTCCATCGAGAAGGTAACCGTGGTGGTTACCGTAAAATTGCCATTGGCACTTCCATTCTGATCCGGAGAATGGGGCTTTGACC	Alt-EJ	spri, exon_6	spri, exon_6	spri
P17	novobreak	TRA	X	12265734	3R	29465597	8	0	somatic_tumour	17199.9	X:12265734 3R:29465597	0.23	0	-	-	TTTTTTTTTTTTTTTTTTTTTTGGCTTTTCCATGGTGGTGACTTTCCGTTGCACTTGCAGCTGCAGGAATCCGAAAACCGGGGACATGCCGTCTAATTCAATT	-	Ten-a, intron	Ptp99A, intron	Ten-a, Ptp99A
P17	novobreak	BND	X	17769397	X	17769504	5	0	somatic_tumour	0.1	X:17769397-17769504	0.09	0	-	-	GGATGGTGGCCACTGTACTGGCGACGGCCGCCACGCAAATGGCCGCTGTGAATGCTAGCAATGCGTTCGCCAATCTAACGGGACTGAGTGCGGCGGCGCTGCGAAACGTGAGTGCCGCCC	-	unc-4, exon_1	unc-4, exon_1	unc-4
P19	novobreak	TRA	2L	553722	2R	10934808	9	0	somatic_tumour	10381.1	2L:553722 2R:10934808	0.16	0	-	-	GTGTAACTTATTGCAAATATATTTGTTATAAGGTGTTGTATTAAGTTAGGCGATGTTATGATATTATTGTATGGTATACTTGTTGAATCCTTTTTTTTTCTCAGTGCGCACACGTATATTTATATCTCAAAGTTCTCAATCAAAACGAACAAGTTACGTATTTGTATAACTTGTATTTGTATTTCACAAGACTGCTTAAATTGCTGCTTATATTGTATAC	NHEJ	intergenic	intergenic	-
P19	novobreak	TRA	2L	3115500	3R	13703238	5	0	somatic_tumour	10587.7	2L:3115500 3R:13703238	0.07	0	-	TTAC	CCAATATTTTCCATCCATGTACAATGGACGAAGCTGAGCGTAAACATTTCAACAACTCTTCCAATGTTACCCAGCTGCTTGAGAAAGCGCAGATCCGCATCCGCCGGAGCCAAGGC	NHEJ	toc, intron	Adgf-D, exon	toc, Adgf-D
P19	novobreak	TRA	2L	3771067	3L	24121078	3	0	somatic_tumour	20350	2L:3771067 3L:24121078	0.04	0	-	-	TTTTAATAGTTCTTGGGCCTACTTGTAGCGGTGGTGGCGTAGCCTCAAAGACAATAGCAGTGAAGCAGTCAACATACACTTCATCGCTATCGTTGATAGGCTGGTAGTTCCCTGTTTATTGTTATGCCTTTTTAGTGGGGGTGTATTTTGT	-	intergenic	Snap25, intron	Snap25
P19	novobreak	TRA	2L	5313800	X	12654753	3	0	somatic_tumour	7341	2L:5313800 X:12654753	0.06	0	GGAAAAGGAAGGC	-	GCCGTAGCCCGCTCCCGGTGCTCGTATGCATTGAGGGATTCGCGGAAAAGGAAGGCAAAACAAATTCCGGAGAGCAGAAAGAGAGGTGGAAAAGAAAGTGTTGAGAAAGGGATGACAGCAAAAAG	Alt-EJ	CG14024, exon_2	CkIalpha, exon_1	CG14024, CkIalpha
P19	novobreak	TRA	2L	6068689	Tomelloso	31531	3	0	somatic_tumour	6037.2	2L:6068689 Tomelloso:31531	0.09	0	AT	-	CACCACAGCCAGTTTGTTCTGCCACCGCTCCATGCCGTCTTGTGAATGAGGAGCTGATGCAAGTAAGAAGCTCGCATCGGAAACTCGGGAGCAGTTTCATGGCTTCTTGGTTCGCAATTGAGGTTAATCTCCAACGGTCAAATTCACAAGAAGCTGTTTGAATTCTATACACATTGTGTGTTTGCACCGGCCATGATACAATTGCGAAGC	Alt-EJ	intergenic	intergenic	-
P19	novobreak	TRA	2L	6110188	Tomelloso	35464	3	0	somatic_tumour	6074.7	2L:6110188 Tomelloso:35464	0.11	0	T	-	ACACATATCCCAGCAATCTACACTACCAGTTCTTTAGTTGTGTGAAAGAAAGCAGATCCCACGATGCTGATTGGATTAGTACGCGACTCGGTTATGCAGTGCTTCTCCCTCACTACGTGCTAGCAGAAATAAATTGAGTGCCCATTGTGGGGTGTTGGTCGGTATACCC	Alt-EJ	stai, exon_3	intergenic	stai
P19	novobreak	TRA	2L	7747929	3R	27519078	3	0	somatic_tumour	19771.1	2L:7747929 3R:27519078	0.06	0	GTTC	-	CATGGGCGTAGCTGTTTATATTGTTTTTTCCCTAGAAATTCGCTTTATGTTCCTACGATTGATTAAAAACCATGGTATCTTAAGATTGCACTCCAAAATTGAAATATTACGTTACTTTCGCTACTCATAAATGCACTTTCAGTATTTTTGG	Alt-EJ	intergenic	intergenic	-
P19	novobreak	TRA	2L	10991843	X	19688243	3	0	somatic_tumour	8696.4	2L:10991843 X:19688243	0.05	0	-	TGCGCCTAAGTGT	CTTCAGCACCCGTGGTATGCTGCGAAAGTCTTCTGCAGTGGTGCCCCAGACGGTCAACTGGAATCGGTCGATGGCCGCCACTGGCTCATTGATGAGCAGACACTTAGGCGCACGAAGTCTATGGCACTGCGGTGATCTTCCTGTTTGTGTTCCGGCTCCAGC	FoSTeS	CG16833, exon_4	CG14227, exon	CG16833, CG14227
P19	novobreak	TRA	2L	19788773	2R	18156855	5	0	somatic_tumour	1631.9	2L:19788773 2R:18156855	0.09	0	-	-	ACGCGACGGCGTCGGCTCGAACAGGGGTAAACAGCAATAAGACTCTCATATGCGCTACACTGGCAGCCGGCTGTATGTTTCTGCGTGGGCGGGGGAGAGCAGGGCATATAGTTTGCCGCCAGAGCTTAAACTTTAGTCTCACGCTCTCTGTGTCCCTCGTTCTCTTTCGCTAAGCGCTCTCAAC	-	CdGAPr, intron	lolal, exon_1	CdGAPr, lolal
P19	Control-Freec	DUP	2L	21390362	2L	21393869	-	-	somatic_tumour	3.5	2L:21390362-21393869	0.44	0.74	-	-	-	-	nrv3, 3UTR	intergenic	nrv3
P19	novobreak	TRA	2R	24570562	3R	4746260	3	0	somatic_tumour	19824.3	2R:24570562 3R:4746260	0.06	0	-	-	GTTCACTTGGCTCCAAAAAATAATGGATCTATAGAGTTCCTTAGTTTGCAAATGTGCAGTTCGTACAGCTGGGACATGCGCTCCAGAAACTCGGCGGTGCCGGGGCGCAGGCGCGTGTGGTACCACGGGGAATGTGGG	-	Fcp1, exon_3	tacc, 5UTR	Fcp1, tacc
P19	novobreak	TRA	2R	16673460	3R	18114304	3	0	somatic_tumour	1440.8	2R:16673460 3R:18114304	0.05	0	-	-	GTGAAGCTCGCTGGCTGGAATAAAACAAAGCAAATGAAAAACAATGCGCAGAGATCAAAACTTTATAGACAGACGCGTTTATAGTTCCGCTGCGATGAGTATTCGTATCTTTGGCTAAATATAACCCACGCGTACTATTTATATCGTTTCA	-	CG30463, 3UTR	sr, intron	CG30463, sr
P19	novobreak	TRA	2R	24191931	3L	14203584	2	1	somatic_tumour	9988.3	2R:24191931 3L:14203584	0.04	0	-	-	TCGTCAGAAAGTTGATTTGGAAACATCGGTAAAGATATCGCCGTATTGCAATTCTTGGCCATCGGCTTGTTGGTTCACTCTTAAAGGCATTGATTTGTTGAAACTTCTGGTATTGGAAAGATCACCAACTTACCTGGTGACGCACTCGATCTGCCCGTCTTTGGTTTAGGCGCTGGTAAGAGT	-	ocm, exon_5	CG32141, exon_1	ocm, nuf, CG32141
P19	novobreak	TRA	2R	24861392	2L	17928964	7	0	somatic_tumour	6932.4	2R:24861392 2L:17928964	0.1	0	-	-	GCACGGTGCGTGGCTGTTTAAAACGCTGTTTACGACTCCGTAAGCGTGCGAGTATGTCTGTGTTAAATTGGATTCGAGTGACAATTGACAAAGGGGAGGCAAAGTTTCGGGGACCTTTGAACCCATCGAAAGTTGTCAATCAGAGGGCGATTTTCGCTGAATTTTCCAACACCCCGTGGATCATGATTCGCCGCTTAACGC	-	intergenic	intergenic	-
P19	novobreak	BND	3L	72734	3L	76450	2	1	somatic_tumour	3.7	3L:72734-76450	0.04	-0.16	-	-	TTGCGCACTGAATAAGTAAAACAATCACTAACAATCTTCCGCTCAGACTTTTGTTTTCCTTTGTCTTGCATCTTTTTTGTGCTATTGTTACAACGGAATGGGGACTGTTTTTTTGTTTATGCC	-	CR43988, ncRNA	intergenic	CR43988
P19	novobreak	TRA	3L	2245015	3R	28316834	3	0	somatic_tumour	26071.8	3L:2245015 3R:28316834	0.06	0	-	-	ATACGAATCCATTGCCATATTGGTCAGCTGTTTAATGGCTCTGCTTTTGACTGCGATGGGTCTGGTTAGCGACAACCTATGACAGGTTGTGTGGGTTTGTCCGGTGGC	-	CG32301, intron	intergenic	CG32301
P19	novobreak	BND	3L	4065761	3L	9407320	2	1	somatic_tumour	5341.6	3L:4065761-9407320	0.03	0.04	-	-	CCGTTGCTCTGCACTCCTCAGCTGATCCGGCGGAGGTTTATCGAGGCGAGGACTAAGATCCAGGTTGTTCGGTCGACGTAGAGCCGTCACCAGATTGGACTTCTCTTCGCCCACCTTTTGGATACCGAAACGGGGAAACTACATTTCATTCTATTTATTTTCCGTTCGTGCTTGTTGTGTTGTAATTGTGTAATAC	-	wit, exon	CG4022, 3UTR	wit, CG4022
P19	novobreak	BND	3L	4982252	3L	19898802	3	1	somatic_tumour	14916.5	3L:4982252-19898802	0.04	0.05	-	-	GTGAGTTGTGGAGAGGAGTGCGGAGGGATGGGAAGAGGTGGCACAGGGTCAGGGGGCAAGGGACAGGCAAAAGGAAATGCGAGGACCTCGACAACGCCTTGGCTGCCACCGGATTTCACTTCCTTTTTTTGACTTCTGGATGAGGAGGCAT	-	Con, intron	Su(Tpl), intron	Con, Mi-2, Su(Tpl)
P19	Control-Freec	DUP	3L	10506972	3L	10513986	-	-	somatic_tumour	7	3L:10506972-10513986	0.38	0.62	-	-	-	-	Rbfox1, intron	Rbfox1, intron	Rbfox1
P19	novobreak	BND	3L	10815481	3L	19549419	4	2	somatic_tumour	8733.9	3L:10815481-19549419	0.06	0.04	-	-	CTCCAGCACCCCATTTAAAGGCCCTTCCTTCGAGGCAACACTCGCTATATAACCATCTTACCCAACGTTGACAGCATACAAAGTAACTTAAATCGAAACAATAAAGCGGATACTTTGGATGGAATGGCAGAGGCGATGGCCAAGTTTGTTATTTGCTCAACGGAAAATATTGAAGATGAGTATAAGCGCTTGGAG	-	CG42831, 3UTR	Ltn1, exon_5	CG42831, Ltn1
P19	novobreak	TRA	3R	7943071	2L	18464955	5	0	somatic_tumour	10521.9	3R:7943071 2L:18464955	0.09	0	-	-	ATTAAATTTCCATGATAAACTTCTTTTAATTTCGCCACTTTTCCACCTTTTTGCACTGGCATTCTGTTAACATCAAATAGGGTAAGTTGCCTTAATAATATTTTTTTATTTTTCTAACCTGACAAATTGCTACAAAGATTAAAATACGTCTAATAT	-	dsx, intron	let-7-C, ncRNA	dsx, let-7-C
P19	novobreak	BND	3R	8015021	3R	25233379	2	1	somatic_tumour	17218.4	3R:8015021-25233379	0.03	0.04	-	-	GTCACGGTAGGTACCCAATATATTGAATAATTTTTAATTTATTATTTCGCTCCTTTGAAACAGTTTGAATGTGAGCCAAACGAAGCCACAAGAACAGGGAAAACCTGGCACGGAACTGTAC	-	Pbp95, intron	intergenic	Pbp95
P19	novobreak	BND	3R	8222686	3R	8519520	6	0	somatic_tumour	296.8	3R:8222686-8519520	0.05	0.07	-	-	ATACGAATTTAATTCAAAATAATTGCACGGCATGCACAGGAGGACATGTGGAGTGCTCTCTGGCTGTGGGGCTGCTGTTGGCCCAAGACTAGTTAGTACTCTGCCTGGAAGTTGGTCAAGAAGGGGAAGTGGAGTGGAGTAGTGAGTTATAAAAGAACCTGCCAGGCTCGATTATCTCTCTCAAACTCGGTAAACATTTATAA	NHEJ	intergenic	CG11737, intron	CG11737
P19	delly	COMPLEX_BND	3R	11840838	3R	11861600	6	8	somatic_tumour	20.8	3R:11840838-11861600	0.18	0.22	-	-	CTTTTGCCAGCTGTCCCAAAACAGCAGAGTGGCGCCGACAACAATGAATGGATATATCTGCAGCCGACATGTGTATAACTTTAAGTTCGCTTGTCCTACCTTCAGGGTATTACAAATTCGAAAGGAATTTTGTTTATGTTTTGC	-	CG6959, intron	CG6959, intron	CG6959
P19	lumpy	COMPLEX_BND	3R	11840838	3R	11861600	6	8	somatic_tumour	20.8	3R:11840838-11861600	0.18	0.22	-	-	-	-	CG6959, intron	CG6959, intron	CG6959
P19	novobreak	COMPLEX_BND	3R	11840838	3R	11861600	6	8	somatic_tumour	20.8	3R:11840838-11861600	0.18	0.22	-	-	AATGGAGCCAATGGCCATGGAACATAACAACAGAAACTACAGTAAAAGCACCCAAAACGGTTAACAAAGCAAAACATAAACAAAATTCCTTTCGAATTTGTAATACCCTGAAGGTAGGACAAGCGAACTTAAAGTTATACACATGTCGGCTGCAGATATATCCATTCATTGTTGTCGGCGCCACTCTGCTGTTTTGGGACAGCTGGCAAAAGTTGGTGGGCGAGGAATCCAATTCGGCCTGATTTTGACACCCGGCCACTGG	-	CG6959, intron	CG6959, intron	CG6959
P19	lumpy	BND	3R	12534177	3R	19941125	7	10	somatic_tumour	7406.9	3R:12534177-19941125	0.13	0.05	-	-	-	-	Octbeta3R, intron	Hs6st, intron	Octbeta3R, Hs6st
P19	novobreak	BND	3R	12534177	3R	19941125	7	10	somatic_tumour	7406.9	3R:12534177-19941125	0.13	0.05	-	-	ACATTTAACTGACACCGAAGGGGAAGAATACAAATCATTGTTGGAATTTCACGCCACGGGTTTAAAGAGAAAAATTTAACTTCATAAAATGTCCGATCTAGCTGCTGATTGCATTCATAAAACCCAACAAAGAAGCCATTTAACTTCAGCATGAACATGTCGAGAGCCAGCAATAAAAACAAGTTGAAAAATAATAATGCTCGGCAATAATTTCCATTCATA	-	Octbeta3R, intron	Hs6st, intron	Octbeta3R, Hs6st
P19	novobreak	BND	3R	17743124	3R	30214752	1	2	somatic_tumour	12471.6	3R:17743124-30214752	0.03	0.03	-	-	ATCTTTAGGTTTTCAACATCTGTTGACCAACATTCCACCGAGTCATCAATTAAGTCAAGTTCGAGGTATCGCGTATGTGGTCTTGTAAATACCAACCTTAACAAAGTTGCATTTGTACAATTATACTGTCAGGTTATTTTGGTATCGGGTAGCAGTAATTACCGTGAGTTTTTGGATAACACATACTTGGGGTA	-	TyrRII, intron	intergenic	TyrRII
P19	novobreak	BND	3R	20476344	3R	27592686	2	2	somatic_tumour	7116.3	3R:20476344-27592686	0.05	0.03	-	-	AATCAAAAAAGAAATGAAAATGGCTTTCAGTTTCTGTGGTAAGTGAAAAACAACAAAGCAAAAGCCGTCCGGCAGCAGGCAATTAAAGCTGGCCCCTTTTGTTTAATTTTCAAATGGTACTTCAGTTGCAGTTAACTTAAAGCTGAAACCC	-	Gfrl, intron	CG5639, intron	Gfrl, CG5639
P19	novobreak	BND	3R	27135525	3R	31630504	2	1	somatic_tumour	4495	3R:27135525-31630504	0.03	0.01	-	-	GGAAGCGGATGTGGAGGCGAAGGCGAAGGCAGTTGGCCTCGACAACAGCGAAAGCGGCAGCCAAGGCAGGAACATTACGAACACTGCAAAAAAAAAAATAAAAACGCTTTTCAAATGGCCAAAGCAACGGTCAGTCGGGGAAAAGTAAAAG	-	CG6051, intron	kek6, intron	CG6051, kek6
P19	novobreak	TRA	3R	27240880	X	18343349	1	2	somatic_tumour	8897.5	3R:27240880 X:18343349	0.06	0	-	-	CAAAGATTTACGTAATTATCCTCGGCGAAGCTGGGAAAAATTGGCGTTGAAATATGCACAGCTCAAACAGCTACCAAATGTGCTCATCTTGCCCAGCGATCAGCGGCATTTCATCCGCTTGGTCAACGACTGCCTGGTGATCAATCCCGGCCGTGTCGCGGACAAGAAGGGTGGAACTTTCGCCCGATTCCTGG	-	DNApol-alpha73, exon	CG6123, intron	DNApol-alpha73, CG6123
P19	Control-Freec	DEL	3R	31994361	3R	32079331	-	-	somatic_tumour	85	3R:31994361-32079331	0.35	-0.62	-	-	-	-	heph, intron	intergenic	heph, CR45556, CR45557, CG2053, krz, mod, Map205
P19	novobreak	TRA	Tomelloso	6209	2R	11742375	5	0	somatic_tumour	11736.2	Tomelloso:6209 2R:11742375	0.13	0	-	-	ACAGTACTCCCCTAATGCGATCGACACAACGAATTATTGACAGCATTTTGCCACCAAATGATCAAACCAATATGTTTTCTGGCTCATTTGCCATCTAGAGTTGATTTATTTTTTTTGTTAACTAGTGGACCTTGGGAATGAAAATGTTTCCTCCTCCTCCTCCTCCTCCATTGTCTC	-	intergenic	intergenic	-
P19	novobreak	TRA	Tomelloso	76121	2L	14257152	3	0	somatic_tumour	14181	Tomelloso:76121 2L:14257152	0.08	0	-	-	GCTCTGAAGGTGTTATGCCCAAATACCGAGTAAAAAATAACAAGCAACTTTCACTTCTCTGACAAGGAAGATATGCCACATGTGCCGCGTCTCGGGTGAAGACATTGCTGTCTTGATGGCACACCACATCTGAAATAAAAGAAAATATTATT	-	intergenic	intergenic	-
P19	novobreak	TRA	Tomelloso	95382	X	7378327	3	0	somatic_tumour	7282.9	Tomelloso:95382 X:7378327	0.14	0	-	-	CAATTGAGCAACTATTCAGTCGTTTCGGCATGCACAAAATTGTTTCGAATCGAGACAATCAAATCTCACGAAATCAATTTGTGGTTAGCGGAGACTTTGAATTCAAACTCAATATGGCCGATGAGCAGAAGGTAAGTG	-	intergenic	CheA7a, exon_1	CR44357, CG1677, CheA7a
P19	novobreak	COMPLEX_BND	X	3057935	X	3299323	7	12	somatic_tumour	241.4	X:3057935-3299323	0.38	0.11	-	-	CTTAAAAATAATCACAAACTCTTTCGATAATCGGACTCCTGAAATTTCTTGGTGCACCCAGGCATAAATCTTGATTAACACGAGAGCGACAAACGACACTGATACACAAAAAACCAAATGAGCCGATGATAAATACAGAGTCGCGGCATTAAGATATAACAATACATCCCAAGATGGAAGACGCATAGAGGCGCCCCAGCTCGCTCTCTAAAATTTAAATGAAATTAGCGCAAGCAGCTATCGCATCGAATTAATCAAAACTTTTGAGTTATCCAATTAGCGCGCGTCGAAAAGTTTATCACCTAGCCCATAACATAACCTCAAACCTCTTAACCCCTCGTCGCCCCAATCGGATTCCCCTA	-	kirre, intron	dnc, intron	kirre, N, dnc
P19	lumpy	COMPLEX_BND	X	3057935	X	3299323	7	12	somatic_tumour	241.4	X:3057935-3299323	0.38	0.11	-	-	-	-	kirre, intron	dnc, intron	kirre, N, dnc
P19	novobreak	COMPLEX_BND	X	3057935	X	3299323	7	12	somatic_tumour	241.4	X:3057935-3299323	0.38	0.11	-	-	GATAAATACAGAGTCGCGGCATTAAGATATAACAATACATCCCAAGATGGAAGACGCATAGAGGCGCCCCAGCTCGCTCTCTAAAATTTAAATGAAATTAGCGCAAGCAGCTATCGCATCGAATTAATCAAAACTTTTGAGTTATCCAATTAGCGCGCGTCGAAAAGTTTATCACCTAGCCCATAACATAACC	-	kirre, intron	dnc, intron	kirre, N, dnc
P19	novobreak	TANDUP	X	4612489	X	4612609	6	0	somatic_tumour	0.1	X:4612489-4612609	0.2	0	-	-	TCATATCAAATATAAAGTAGTGTTGTTTAACGTTATTTTTGTAGGTTGAATAGTATATTCCAACAGTTTTTTTTTAGATTTTGTACAAACCCGCAATGCCCATCGCAGCACCGATACTTTTCACAAAATTCCGCAGATCCCAGATAATGTGAAACCACAATCGAGTTAGCAGAACTTGGTAGTGGTTTCACATTATCTGGGATCTGCGGAATTTTGTGAAAAGTATCGGTGCTGCGATGGGCATTGCGGGTTTGTACAAAATCTAAAAAAAAACTGTTGGAATATACTATTC	-	intergenic	intergenic	-
P19	novobreak	TRA	X	5718128	3L	13369579	3	0	somatic_tumour	7651.5	X:5718128 3L:13369579	0.06	0	-	-	TCGGTATACGGGGCGTATTAGCAATATCTGCGTAACCAGCGCACCCGGATTGAGGGAAAAACTTGCCAGCCAATAGCACACATGACTCAACACACAAAATACTTGGCCAAAAAATGCTACAGCCCAGACTTCGAGGCCGGAATCGGAGGGAC	-	intergenic	intergenic	-
P7	novobreak	TRA	2L	65533	2R	21906958	3	0	somatic_tumour	21841.4	2L:65533 2R:21906958	0.1	0	-	-	TGCTGGTGTAGCTGCAACATCGCTCGCTTCCGCCGCAATTCGTAGTTTGCTTGTTGTCCACTTAAAGTGCCTTAGATGAAAAAAAATCAAGGATATGTGCGCCCTGGTACCCAATTCTTACC	-	intergenic	Fili, intron	Fili
P7	novobreak	TRA	2L	174862	3L	4661861	3	0	somatic_tumour	4487	2L:174862 3L:4661861	0.14	0	-	-	GTTTTTATGTCACAACCCCTTAAACCGAACCCCTCCGTGCAGCCTGCAAGCCTTACAACAGAGCATGATGGAATTTATACATAGTTGTTCTTAAATTAAAGACATATACAAA	NHEJ	spen, intron	axo, intron	spen, axo
P7	novobreak	TRA	2L	483252	3R	30098205	2	1	somatic_tumour	29615	2L:483252 3R:30098205	0.09	0	-	-	CTTTTTCCACTATTGCTCAGCAAAAGAAACCAAATTATTTAATTAGAAGTGCAATATGTTTTTGAAGGTTTAATTTACGAAGAACGATCGTTAAAAGCTCACTTAAATGGAAATTCTTGACAGAGGAGAGGTG	-	ush, intron	sima, intron	ush, sima
P7	novobreak	TRA	2L	603468	3L	302053	3	0	somatic_tumour	301.4	2L:603468 3L:302053	0.12	0	T	-	TGGTAATGACTTAAAAATGTATCTTACGTAAAATGTTATAATTTAAGCTCAAGTTTATAAGTTTGGTATTTAGTTGCTCGTGCAGAGGAAGGGTCTGTTCCTGTTCCCGT	Alt-EJ	CG13689, 3UTR	RhoGEF3, exon_4	CG13689, RhoGEF3
P7	novobreak	TRA	2L	666036	3R	7433241	3	0	somatic_tumour	6767.2	2L:666036 3R:7433241	0.11	0	-	-	AAACGAAGCCCCGGTCGAGACAATTACGATGGAGGGGAGACCGGCGTGTAATTCAGCTAGGGGCTTTCTCCTTTCTTTTCTCGTTTTTCTTGCGGGTCAGAGACATTATGTTGTGACATTTATCAGCAACTCATGTGGGT	-	ds, intron	intergenic	ds
P7	novobreak	TRA	2L	1621944	3R	6345586	3	0	somatic_tumour	4723.6	2L:1621944 3R:6345586	0.1	0	TGCCGC	-	TTTTCCCTTTGGCTGGCCACATCTCGTTGCTTGGGAAACTCGAGAAAATTAGGTTATGCCCTGTTGTTGCCGCGCCAGCTCCTCCGGGGTCAGCTCCGATTTCGGTTTCACAAGAG	Alt-EJ	CR44603, exon_1	SmD2, exon	CR44603, SmD2
P7	novobreak	TRA	2L	2029429	3L	7940911	3	0	somatic_tumour	5911.5	2L:2029429 3L:7940911	0.1	0	-	-	CCTTTGGCCTGGTAAATCAACGTCTATGATTAGAGCTTAATACATCTTGATAAGGTCGCCATAAATGAAGGTAGCTCGGGTTGAACTCAGTCAGAACTCAAATTATTGATAAATCAAAAGTATAACACTCACCTCCAGTTCGTTTTCATCGAAAATGCTGAGAAGGTTATCC	-	CG4238, intron	intergenic	CG4238
P7	novobreak	BND	2L	2065379	2L	19693188	3	0	somatic_tumour	17627.8	2L:2065379-19693188	0.08	0	-	-	CCAGGAGCAGCAGGAGGAGCAGGAGCAGCAGGAGCAGCAGGAGCGGCAGGAGCTCGACCTCGCTTTTTATTTATTTACTTATTTATGGGCCGCGCCATCACCGCCATCCCACCGCCTCCTGGCCATAG	-	dpr3, intron	CG46244, intron	dpr3, Lar, CG46244
P7	novobreak	TRA	2L	2208673	3L	17103423	3	0	somatic_tumour	14894.8	2L:2208673 3L:17103423	0.08	0	CATCT	-	AGCGGATACCCCGGAGATATCCATTCCGAACTTCGGATCGAAAAAGATGTTGTACTTGCGTATTTTTTGTGTGTTGGTGGGCGAGTCTATGTGTGTGTGTGTGGAGCTTTTGTTGCGGTGCTGCAGTGCAATTTTCCCGACCCACACCCCCTCCCCTTTTG	Alt-EJ	CG33124, exon_2	Rbp6, intron	CG33124, Rbp6
P7	novobreak	BND	2L	2241903	2L	11365061	3	0	somatic_tumour	9123.2	2L:2241903-11365061	0.11	-0.01	-	-	GTATCGGCATCTGTATCTGTATCTAGCGAGTGTTTACCTTTGCCAATAAATTCTCTTAATTGCCGTGAAATAATCATAAAGGCTGCGTTATGAGTATGGTTTTCCGAATCCTGGGGCCACGTTTTTATGGCTGTCAGTCAGCGCGAATGCTTATCGC	-	intergenic	salr, intron	salr
P7	novobreak	TRA	2L	2371725	2R	22139254	3	0	somatic_tumour	19767.5	2L:2371725 2R:22139254	0.09	0	-	-	CATTCATTGCAATTTTCGTATTCCATTGCATTCCGGTTGATAAGGAACCACCCAGTTCCGCACACTGGCGCTCTATAGTTGCATTTTCGGGCTACGATTCTCGTTTTCTTATAAATCCTATAGAACGTAGACCTTTCCGTCGTTGATTTGTATGATTGGTTATTGAATAAACAATTTATT	-	intergenic	CG11269, exon	a, CG11269
P7	novobreak	TRA	2L	2691227	3L	19049563	3	0	somatic_tumour	16358.3	2L:2691227 3L:19049563	0.11	0	-	-	CACCTGCGATACCAATTGATTAGATCACGCCCCCTCAAACTTAAATGAACCTTTCGAAAACATTTAACGAAATAAATAATCAAATTGCAACACACATATGCATATTTATAATAATTGTGTGTGTGTGTGAGTGTGTGTTCCTTTTAC	-	CG31690, intron	intergenic	CG31690
P7	novobreak	TRA	2L	2716106	2R	24871228	3	0	somatic_tumour	22155.1	2L:2716106 2R:24871228	0.14	0	TAAGCTGCTGT	-	AGAGATATCCCGGCTATTGATGGCTTACGAGTAAATAATGTACAAACAGCAGCTTAGCTGGCGGTAAGCTTTAATAAACCATTCCTGAAGTTAAGTTAATTTATTTTCGTTTATAGTGGTGGCC	Alt-EJ	CG31690, intron	Atf-2, exon_1	CG31690, Atf-2
P7	novobreak	TRA	2L	2766399	3R	15255243	4	0	somatic_tumour	12488.8	2L:2766399 3R:15255243	0.15	0	-	-	ATCCCAAGGAGCACTTCCTGCCCAACGACACCAGTGCGGATCATCATTCTGATTGCGGCGGCATTCTTCTGGCTGCTTTCCCTGCTGATCTCTTCCCTGTGGTATGCCCTGATTCCGCTGAAGGAGTTCCTGGCATTCGGCGTGGTCTTCTCGGTGTGCTTCCAGG	-	aph-1, exon_1	CG42404, exon_4	aph-1, CG42404
P7	Control-Freec	DUP	2L	2787990	2L	2797940	-	-	somatic_tumour	9.9	2L:2787990-2797940	0.43	0.71	-	-	-	-	Syt1, intron	CR43821, ncRNA	Syt1, CR43821
P7	novobreak	TRA	2L	2837516	3R	23683953	3	0	somatic_tumour	20846.4	2L:2837516 3R:23683953	0.15	0	GCG	-	GTGCTCACTTGTCCGGAGAACGTGCAGAGTCTGGCCAGAAGTGTCTACGATACCTGGGGCCAGCGCTGCAGCCGCAAAAATAAATTAGGAAATTTCATTGAGTCATTGGGATTTATGAGTTTGTTGATCCATT	Alt-EJ	CG3119, exon_1	CG16710, 3UTR	CG3119, CG16710
P7	novobreak	TRA	2L	3145342	2R	7504368	3	0	somatic_tumour	4359	2L:3145342 2R:7504368	0.13	0	-	-	AGCTTATTTCGATCAGAAGAGGAACGAGTACCTGGCCAAAAGGGACGCCGTCTTCCGGCATACAGACCTACGCCCGCGGCATGCTGGCGCGCAACAAGTTCCACGCGATGCGGGATCACTACCGGGCAGTTCAGATCCAGCGTTTCGTGCGTGGTGCTTTGGCACGGCGAGCTTACCAAAAGCGGCGTCGCAACATCATCATTTGTCAAG	-	ND-B14.5B, exon_2	didum, exon_9	ND-B14.5B, didum
P7	novobreak	TRA	2R	16697447	3L	1885675	4	1	somatic_tumour	14811.8	2R:16697447 3L:1885675	0.16	0	-	-	GATAGAACTTAAGAATCCTCTATTTTACGGTTATAGCTTTTGTAGCTCTTTAAAAATTCCGGAATGCTTTACGGCTATTCGCTGAGAAACGAACTGAATCTTTCTTGGCATTGGGAGTCTAAGATACAGACACACAGAT	-	CG30463, intron	Tmhs, exon_1	CG30463, Tmhs
P7	novobreak	TRA	2L	3225319	X	4453399	3	0	somatic_tumour	1228.1	2L:3225319 X:4453399	0.19	0	CC	-	ATGTAAATGTTTATTTGACAAGCTGTTAAAGTTCCATTGTCTTCGTTGAGTTAACAAGTCACGGAAATGACTGAGAAATAATAGTCCGAGTTTGGGTACCAACCCCAACCGCTTCATTTCATTTTTGGTTTCGGTGAAA	Alt-EJ	intergenic	bi, intron	CR32773, bi
P7	novobreak	TRA	3L	3850501	2L	17992512	7	0	somatic_tumour	14142	3L:3850501 2L:17992512	0.25	0	-	-	TTAGAAAATAACTTATTGACCATTAAGTTTTTAAAGGCTACACCCATAAGCTCTGAATTTCCAGCTTGATGCAAATGTTTTATTGAAATTTATTGCCCAACAAATTGCATAGCCACAGGGCGCTCTATTATACAC	-	Awh, intron	intergenic	Awh
P7	novobreak	TRA	2L	3399658	3L	3296613	3	0	somatic_tumour	103	2L:3399658 3L:3296613	0.09	0	TTGACTGGC	-	AGCCATAACTTGTGGTATGCATCTGGGGCGGACATTGATTTGACTGGCTTCATGGGCTTGGCAGTTTGGACTTCGGGCTCCGCCGGAACCTCTGGCTCTGACTCAACGGG	Alt-EJ	intergenic	CG12009, exon	CG12009
P7	novobreak	BND	2L	3798316	2L	21842984	3	0	somatic_tumour	18044.7	2L:3798316-21842984	0.08	0	-	-	GGAATGTCGAGGTGACGAGGAGAGAATGGAGGATTGTGCGGAGCGATTGAATGGTCAACTTTATGGACATCGCCACGAATGCCGTTGGGATCCTTGTTGCGCTAACTATCGGCGATCGAGCGTATCGACAACTCCTTCTGTT	-	bark, exon_5	intergenic	bark
P7	novobreak	TRA	2L	4004703	3L	16251568	3	0	somatic_tumour	12246.9	2L:4004703 3L:16251568	0.1	0	-	-	GCAATCACTTGTTGTTTTGTTAATGTCTAGCAAAACTTTAATTCATTTTCACCAATTCTTTGCCTGCTGCTCCTCGATGTCCAGCGTGCTGCTCGTTTCGCTGGAGGCGCACGACATGGACATCAGCTCCAGACGCGACTGGTGTGCGTTGAGGCC	-	intergenic	CG13055, exon	CG13055
P7	novobreak	TRA	2L	4687951	3L	23096651	4	0	somatic_tumour	18408.7	2L:4687951 3L:23096651	0.13	0	AGCA	-	CTCCGTCATAAGTACCACTCACGGGTAGCATTGCTGTCCATGAGCAAGGAGGAGAGGGAAGATGCCGGCGGCCAGCAACTGTTGGTCCAGTACACCGAGAATGAAAAGGCGGGCGAGCGCCTCATCCAGAAACTTGTTTCTCCAAACAATGTAATGCTGCTGAGCACCAAGCCCGAGCTGAAGGGTAATCCTCTGGTG	Alt-EJ	Elba3, exon	intergenic	Elba3
P7	novobreak	TRA	2L	4800841	2R	13316186	3	0	somatic_tumour	8515.3	2L:4800841 2R:13316186	0.08	0	-	-	GCATTGCAAAGCATTGCAATTGTGAGTTGCTGCATCCTTCCACTAAGTGTGCATTTGTGTCCGTGAGAAGGCGTGGCACCAGTCGCGCCCCTTTGCTGACCGCTGATAAGCGCTGGCCCGTCGTTAATGATTTATAGTTGCCAAATCAGCGGACAGCTGGCGATCAAATAAACACT	-	Clect27, intron	intergenic	Clect27
P7	novobreak	TRA	2L	4928549	3R	22460521	3	0	somatic_tumour	17532	2L:4928549 3R:22460521	0.1	0	-	-	TCCGATGCCCATCCGATGCCGATCCGATGCCATGCAGGCGTAGCTATAGCTACTTATTCCGATACTCATGTTGCTACTTCGTGCGGCTATTTATGTAAATGTAAGCCTAAGCGTCGCCCTCGAT	-	hoe1, intron	CG34376, 3UTR	hoe1, CG34376
P7	novobreak	TANDUP	2L	4952655	2L	12989484	8	0	somatic_tumour	8036.8	2L:4952655-12989484	0.2	0	-	-	ACACATCCCTAGGTAGCTACAAGTCGAAGTTCAGTCAAGTGCATAAAAAGTGAAAAACAATAAACATCATCGGGCAGCTCCACCTTGTTGATCAGGTGCCAGAAGTCCACGTGCGGGGTGTTGATCAGCGAGATGTCGTTGTTCAGGTTGTTGG	-	Jon25Bii, exon	intergenic	Jon25Bii
P7	novobreak	TRA	X	14753155	3R	17275527	3	0	somatic_tumour	2522.4	X:14753155 3R:17275527	0.11	0	-	-	GCCCAAATGTATTCGTTCAGCTCGGTTACTTATCAAATGCGCACTTTGATTTGTTGCTTACCGAGCAGAACTGAATTGGTTCTGTGAAAGGTTAAAATAGTTAAACCTTGCAATAGATTATAC	-	intergenic	intergenic	-
P7	novobreak	TRA	2L	5077640	3R	27530506	3	0	somatic_tumour	22452.9	2L:5077640 3R:27530506	0.13	0	-	CTGCTTGTTG	GAGACAGCTCCAGATTTTCGCCGCCCCAAATGTCCATGCCCTCGTCGTAGGAGCCAATCTCATAGAAGTAATCCTTATCGATGGAGAACAGACCACCGGCCCTGCTTGTTGTAAAACTTTCAATATGAATTCGAGTTTAAATA	FoSTeS	pgant5, exon_6	CG12885, intron	pgant5, CG12885
P7	novobreak	TRA	2L	5185983	3R	19218961	3	0	somatic_tumour	14033	2L:5185983 3R:19218961	0.12	0	-	-	GAAGAAAACACACGTTAGTCATATCATGCTGTGGATTCTTCGTTTATTCATAATTCTAATTTTTGCAGCTTTTCTGTGTGGTTTCGGTATTTGTTCATGGCTTTTATACGGCAATCGATCGTGTTGCTGTTGTGGCCAGGTTCCGACC	-	Msp300, exon	vib, intron	Msp300, vib
P7	novobreak	TRA	2L	5246840	2R	18197358	4	0	somatic_tumour	12950.5	2L:5246840 2R:18197358	0.15	0	-	-	GCCCTGCAGGCAGCAAAAGTGCATGCGTGCACTTAACACCTTCTGCGCAAGTTTTTTAGCTGGGATCCTGGCTTTTGGCGTACCCGTTGCAACCAGGAAGTGGGGTGGATCATGGAGCCATGGCCATATAGCCCAAGCTGGGCATGAACCGTTTGGCCGGCTGGGCCCTAACTGCTGCTGCCCTGCAGCGGCGATCGTCATAGGCTGCAAAAAAAATTATATATATATTTATG	-	tkv, intron	intergenic	tkv
P7	novobreak	TRA	2L	5311551	3L	21953089	6	0	somatic_tumour	16641.5	2L:5311551 3L:21953089	0.19	0	-	-	TGGAGAATCGTCGATGACATTGATAAAAATATGGTGTTAAAGCGAAAAAAAAATTCATCCAGCGAATGTTTTGGGAAAAACGTATCTAGAGTCCACAAAAGTTATAGACTTAGATCAAGACCTGTTTATAAATTTCGTTAATATATAGGTATATAT	NHEJ	CG14024, 3UTR	intergenic	CG14024
P7	novobreak	BND	2L	5454015	2L	19145783	3	0	somatic_tumour	13691.8	2L:5454015-19145783	0.07	0	-	-	GAGTGGGCCAGTCGACAATAAAAAAACCAAAAAGAAACGAGAAAAGGGGGAAAATTCTTGAGGGGAGTGCCGCCAAAGAAATAAATTAATCATATTAGATTTGATAGCCAATTAACTGCCATGCAATTATTG	-	intergenic	brat, intron	brat
P7	novobreak	TRA	2L	5529404	X	17596447	3	0	somatic_tumour	12067	2L:5529404 X:17596447	0.13	0	-	-	GGTGTAAATTCGCTTCGTCTGAAGGGATTATTTCTTTCCTGTGTAGGCGGAGCACTTCCCGGCCGTTGATGGCAAAGAACTGAGCACGGAAAGGCTGCTGGAGATGGGCGTACGATTTCTGCCCGGCTACGAGGATCCCTATCATCATCGGGCGATGACAATGGGCGAGATTGGCTGCTTTCTGAGCCACTACAAC	-	CG31915, exon	CG12991, intron	Cap-D3, CG31915, CG12991
P7	novobreak	TRA	2L	5777785	3R	11302926	3	0	somatic_tumour	5525.1	2L:5777785 3R:11302926	0.1	0	-	-	AGACAGATTGTTGGCTGCCCTAATGAAATTTCTCGTTCAATTGTTGACTTACATGATTACCACTCGGTGCTCGTAAGCATCCCACTTCCACTGAACCATCCACATCG	-	CG9171, intron	CR31386, ncRNA	CG9171, CR31386
P7	novobreak	BND	2L	5923419	2L	5923721	4	0	somatic_tumour	0.3	2L:5923419-5923721	0.14	0	-	-	AATGAACAACTGGTAGAACCAAACTCGACAGGCTGAGAAATGAAAAACCCCCAGCCTCCTGTGTCTTTCGAACCTGCGAGCAGTAGCCGCCGTTGTTGGAGCTGCAACTGTTGCTGTTGCTGTTACTGTAGAAGCCGTCCATGCTGCTCACTAAAATCGTAGTGTTAAAAAAAATATAACTATTATTAC	NHEJ	CG9016, exon	intergenic	CG9016
P7	novobreak	TRA	3L	18201995	2L	5982759	3	0	somatic_tumour	12219.2	3L:18201995 2L:5982759	0.09	0	-	-	AGCTTGAACAAAAATACTCGGATGCACATGAACTCGGGCCCAAGCCGTCGAAATTCAGGATATAAGTTTACCTAGTCAATTCTTTATTGTTGATAATGTGA	-	CG7320, exon	eIF-4a, 5UTR	CG7320, eIF-4a
P7	novobreak	TRA	2L	6162141	3L	11842292	5	0	somatic_tumour	5680.2	2L:6162141 3L:11842292	0.19	0	-	-	CCTTCTTTCCGTGCCTCGATTTTTTTTTTTTTTTTGCTTTTGTTTGCTAGTAATCATATTTTAATGCCCTTTAAACTATTTTCTGTTGTGAGAAAGGGGATAAGGAATTATAATTAATATGCTGATTTTTGACATGAGTGTATCTTGGCTTGATTTTGTATCTTTGTCTGACTG	-	intergenic	intergenic	-
P7	novobreak	BND	2L	6259554	2L	17917524	2	1	somatic_tumour	11658	2L:6259554-17917524	0.08	0.01	-	-	GATTTATGTGTCTGCTGCAGTGCGGTTCAGACGCGACCACTTTGAAAAACTTGGCTCAACCTATCGCCAATCGGATTCATGGGCTAGCCAATGTCTGGTCTGTGTTTTGG	-	Ddr, intron	intergenic	Ddr
P7	novobreak	BND	2L	6273754	2L	12455352	9	1	somatic_tumour	6181.6	2L:6273754-12455352	0.26	0	-	-	GTCTTTGGACGGACCACTTCCTTGGCCCAACAATTATTAGTTACGGTTTTGTTAGTGTTGATTAGTATTGCTTAATTTCATTGATTCCCACAGAAAAATTATATATGTGCAATAG	-	Ddr, intron	intergenic	Ddr
P7	novobreak	TRA	2L	6469039	X	18063310	3	0	somatic_tumour	11594.3	2L:6469039 X:18063310	0.14	0	CGGGC	-	CCACATGCGAGGCGAGATTCTCGCCGGCGTAGGTGACGAAGGGCGAGATCTCGCAGACTTCGCCATGCACAATGCCACCGGCGCCTTCGATATACTTCTTGTGCAGGCGATGGAGGACCGAGCGGGCGTTGCGATTCTGGGTTCCGCAGACTAGAGTCTCCAGCGCC	Alt-EJ	mmy, exon	intergenic	mmy
P7	novobreak	TRA	2L	6567403	3R	19234202	2	1	somatic_tumour	12666.8	2L:6567403 3R:19234202	0.11	0	GTG	-	GGATACTTCCACCCAATTGTAGGCCACTGAAATTGGATAATGACCGTGGTGACATACGTGAGTCATGGCCGTGCGCAACAAGTCCCTGGAGAATGCAGCCG	Alt-EJ	intergenic	unc79, exon_22	unc79
P7	novobreak	TRA	2L	6582343	3R	15642669	3	0	somatic_tumour	9060.3	2L:6582343 3R:15642669	0.08	0	-	-	GGTACAATAAATATAATAAATCAACGAATGACAACCATAAATAAACAAACTTTACCCAAAGCCGAACCAGCACCTGCCTGAATTATCGCAACCTCTTAACTGCTGTGTTTACCTTGACCAGCCCACACGTTTTTCTCTCTACCGGGAATCC	-	CG11319, intron	intergenic	CG11319
P7	novobreak	TRA	2L	6641134	2R	24855620	4	0	somatic_tumour	18214.5	2L:6641134 2R:24855620	0.15	0	-	-	CTATAATTATCCGCCGCTAATAATATTCAAATACCCCGAACATCGTAACCCACTTCCAGCATCCATGGTGACATGATCATCGACAATTGCCGGCGTCGGCATCAAACACATTGAGCGACATAGACAAATTGTCCGTCTACACAAAGTAAAAAAAAAAAAAAAATTTTAAAG	-	CG31635, intron	intergenic	CG31635
P7	lumpy	BND	2L	6755669	2L	9204071	6	0	somatic_tumour	2448.4	2L:6755669-9204071	0.16	0.01	GAGATCAAA	-	-	Alt-EJ	CG11221, 3UTR	tai, intron	CG11221, tai
P7	novobreak	BND	2L	6755669	2L	9204071	6	0	somatic_tumour	2448.4	2L:6755669-9204071	0.16	0.01	GAGATCAAA	-	GGAAAGTTATCCGTTGACGTGTTTTGTTTTTTTTTTTTCTTTTTTGATCTCTTTCCCGAAAACAGCTGTGTCCTATAAATTTTGCTTCGCCCACAACAAATTTGCAT	Alt-EJ	CG11221, 3UTR	tai, intron	CG11221, tai
P7	novobreak	TRA	2L	6896861	3L	21622111	3	0	somatic_tumour	14725.2	2L:6896861 3L:21622111	0.08	0	-	-	TGTCCGGATGCATTGACCAAGGCTATTTAAGGATGCCACGCTCTGATGCGTGGCGCAGTTAAGACCAGAGCCTGACAGCGTAAATGGTTCTTTGGTATAGGTGTGTCC	-	Nlg2, exon_1	CG7166, intron	Nlg2, CG7166
P7	novobreak	COMPLEX_BND	2L	6904847	2L	17651652	2	1	somatic_tumour	10746.8	2L:6904847-17651652	0.07	0.01	-	-	CAATTGCAGACTAAGCCAGCTGAAGATGATAACATCATCATCATGCAGAGGAGCAGAACAACGACGCCACCGCCGCCCTCAAAGAATCCGCCGTCGAAGAGAAGTATAACTGAAATTGTTCTGCATGTTAAAT	-	Nlg2, exon_12	CadN, intron	Nlg2, CadN
P7	novobreak	COMPLEX_TRA	3L	15675946	2L	6904318	3	0	somatic_tumour	8771.6	3L:15675946 2L:6904318	0.11	0	-	-	AGTCTGACTCATCCCAATCTCAGTGAGGCCCTCAATCTGGCAGTGCTCTACAATCAGCGAAGAAGCAATGCGATGCACGAGAAGCGATCCTACATTAATCTTAACAAATAAAATATATGAAAAGCAAGATATGATAA	-	intergenic	Nlg2, exon_10	Nlg2
P7	novobreak	COMPLEX_TRA	X	11061683	2L	17652063	3	0	somatic_tumour	6590.4	X:11061683 2L:17652063	0.11	0	-	-	GGCTGAAAGCTGGTGGAAAAAATGACGTCGGTAACAAAGTGTTTCAAATTTGTTTACTACAAAAAGTGGATTGCTTTTTGGCCATCTAACAAAGAAAAACAGAAAAAATCCAACTTTCTGGGAACGAAGAAGCCGCAGC	-	intergenic	CadN, intron	CadN
P7	novobreak	BND	2L	7069280	2L	15036944	2	1	somatic_tumour	7967.7	2L:7069280-15036944	0.08	0.01	-	-	ATTCAATCCTGGTTTTCGACTTGAAAACAGATACTTTACTGCGCCGTTTCAGAATGCTTAGCGATTCGAGTTATGGTGAAACTATATTGAAAGCTTCTCAATTGTATCGCGATCGTCCAGTGAGTC	-	CG11289, exon	CIAPIN1, exon_3	CG11289, yellow-c, CIAPIN1
P7	novobreak	TRA	2L	7096540	3L	4603018	4	0	somatic_tumour	2493.5	2L:7096540 3L:4603018	0.12	0	TGCGAAC	-	ACTGCACCTGTATGTATCTGTGTATGATTGTATCTGTGCTTGTCTGTATCTGTGTGTGCGAACTTTTCCCTTGATGCATTATTAATAACTCCAGCGCAACAAGGATA	Alt-EJ	intergenic	Src64B, intron	Src64B
P7	novobreak	BND	2L	7116469	2L	12408973	2	1	somatic_tumour	5292.5	2L:7116469-12408973	0.08	0.01	ATTTCCCACTC	-	GGCTACAAGAACTTGACATAATATTTTGATAAATTGTTTTTCATTTCACTTCCATGACATGGAGTGGGAAATGCGGCAACTACAAGGGGAAAAGCGGCAGGGCGGTGAG	Alt-EJ	Pvf3, intron	vir-1, intron	Pvf3, vir-1
P7	novobreak	TRA	2L	7331078	X	6085542	3	0	somatic_tumour	1245.5	2L:7331078 X:6085542	0.18	0	-	-	TACTTCTACCACTATGACTAATGGGTGCCAAACCTGGCCCAGAGCTGTCCAAGCCGTCACTAATCGGGCTTTGCTCGGGGTATCCTCGGAGGTGGCAGAGCTGGCCGGCGGCGAGGATTGCCAG	-	intergenic	Mipp2, intron	raptor, Mipp2
P7	novobreak	TRA	2L	7458082	3R	17006857	4	0	somatic_tumour	9548.8	2L:7458082 3R:17006857	0.14	0	CTGAA	-	ATTTATCATTCTGTGGAAAACAAAATAAGTTGTTCCAATTTTCTTTCCACCAATCTGTGCTACGGTTAAGTGCCGCCCTTACCTTATTGACCATCACCAGTCGCATCTCCACCAGATATGTGAAGCAACTGAATTCCGGCCTTTCAGCTGTTCCCCAGAATATCTTCCAGTTGCCATCGGCCAGGTTAGTATTGGAAAAA	Alt-EJ	Gr28b, exon_1	Irc, exon_10	Gr28b, Irc
P7	novobreak	TRA	2L	7807464	2R	8157412	3	0	somatic_tumour	349.9	2L:7807464 2R:8157412	0.1	0	GGCAG	-	TATTAGTTGGCAACAAATGCGCCCACGCCGACTTGCACACAAAACCTGACTTGCCATAATTGGATGGCAGGCCAAACGTTTCCTCGACCTTCAAAAATGTGTCCATGTTCAGGA	Alt-EJ	cdc14, intron	CR30374, exon_3	cdc14, CR44068, CR30374
P7	novobreak	TRA	3R	28721607	3L	20665219	3	0	somatic_tumour	8056.4	3R:28721607 3L:20665219	0.11	0	-	-	TTTCTATCGAAGGCACCGCCGGGACAGAAACAAGGCCAAAGGACCGGCACCGCAAGCGATTTTCCTGGCCAAAGCGATTTGCAAAAGGCAACAGATTTGTGATTCGTTTCAATAACATGGAATTAAGG	-	htt, exon_20	intergenic	htt
P7	novobreak	TRA	2L	8190937	3L	14139352	3	0	somatic_tumour	5948.4	2L:8190937 3L:14139352	0.09	0	-	-	CTTTGGCCCCGTGTCTGTCAATCGGCTGACGAACGGGGGCACGGAATCTGACCCTCGTCTTTGTTGGTCGAGTGTTTGATTAGTTAATAGGTCAATAACACTGGGGGTGGAAACC	-	CG8475, 3UTR	intergenic	CG8475
P7	novobreak	TRA	3R	20430513	3L	14115937	4	0	somatic_tumour	6314.6	3R:20430513 3L:14115937	0.15	0	-	-	GTTTTAATTTTATGCTCAACGACTTTCGACCTGTGGGAGCGTTGAAACGGCAACTTAATCACTTTAAGATGATTGTGGTTTCCATTCTTCTGCAAATAAACCTTCTTATTTATCGTATTTC	-	Gfrl, intron	Sox21b, intron	Gfrl, Sox21b
P7	novobreak	TRA	2L	8299956	3R	7942912	3	0	somatic_tumour	357	2L:8299956 3R:7942912	0.1	0	-	-	TTAGTCTCTTGTCTGATTCTTTGTATAGTCCATTGTGGCTTTAGCTCATTAGGAATCGAATAAAGATATTTTACAACAGATTGGCTGCTTAAGTATGTAATACTTCTTGTTCTAGCGACAATAAACAAAAATTAAATGCAAAGAAGAATACAAAC	NHEJ	Btk29A, intron	dsx, intron	Btk29A, dsx
P7	novobreak	TRA	X	12959888	2L	6503252	3	0	somatic_tumour	6456.6	X:12959888 2L:6503252	0.1	0	-	-	CTATTCCGTCTCGTATCCCGCCGCTCCGGCAATGCGGGTGTATGGATTTCTTTATAGAAGTAGATATATTCACTAGGCACAAACAAAAGATGTGCACTATTCACACTTAGCATAAAGATAGTAGTTTTCTTTTTTTTGACTAGCTAATTGAAATTGGAGCATGTAGAGC	-	CG32642, exon_2	CG31637, intron	CG32642, CG31637
P7	novobreak	TRA	2L	8839310	3L	20350987	3	0	somatic_tumour	11511.7	2L:8839310 3L:20350987	0.09	0	-	GATAG,CTGTC	CACAACTACGTGCGGAAGGTCGCCGAGGTGGCCACCCAGCTCTTCATCACGAACGACAAGCCCAACATTGCCGGACTCATCCTGGCTGGTAGTGCGGCAACAAGTGCAATTAGCAACCCTGGTTCGACACAATGAAGCGTGTGACCTGTC	FoSTeS	intergenic	eRF1, exon_4	eRF1
P7	novobreak	TRA	2L	9160984	3L	10614528	3	0	somatic_tumour	1453.5	2L:9160984 3L:10614528	0.08	0	-	-	ACACACTTGCACACACTCGGCCAACTTAACATGCACACACTTTGCCAACAATTGTGAAACATTCTCCCAGCGCCCCACTGAGTGTGATCAGGTCAAATCTTTTGTTGTTTTACATTCGGCGGAAAAACGTTTACATAACCTTTAACT	-	CG32982, intron	intergenic	CG32982
P7	novobreak	TRA	2L	9252716	2R	15410147	3	0	somatic_tumour	6157.4	2L:9252716 2R:15410147	0.09	0	CGAGCAGCTG	-	ATAGGCCAACAAACCTTCGTCATTGCGACTCCCAGTGGCGGAGGGGGCGTGGCCCTCGATGGCGCTGCCACTCATGGACATCGAGGCGAGCAGCTGTAAGCATTTAAATATTTTGACAATTCTTGTTTGTGTTCCGCCTCTCTTTCTTTTTG	Alt-EJ	borr, exon_1	CG43729, exon_2	borr, CG43729
P7	novobreak	COMPLEX_TRA	2L	9553073	3R	22593893	3	0	somatic_tumour	13040.8	2L:9553073 3R:22593893	0.1	0	-	-	TCCGATGCATCCGTAAAAATGGGCGTGGGCTTGTGTTCGTGTGTGCGTCCAAGCATTGCCAAAGATGCAACAAATGCAGTTGCAGCACATGCAGCAAGCAG	-	jp, exon_7	Efa6, intron	jp, Efa6
P7	novobreak	COMPLEX_BND	3R	22214137	3R	22598989	7	0	somatic_tumour	384.9	3R:22214137-22598989	0.15	-0.01	-	-	GCTGGCTGTGACTGGAGCTGCTGCTGCTCCTCCACCCTCTGCTGCTCCTCCACCTTCTGCTGCTGCTGCTGTTGCTGCTACTGCTGTTCCCCCACCCGCCGCCCGACAGCTCCCGCAATTTTCCGCATTTCCATCGAGAAGAAAATTAAAAATAGTTTACAAGTGCCGACAGCCCAACATGCGAATAATAAT	-	Gld2, exon_1	Efa6, intron	SKIP, Gld2, Efa6
P7	novobreak	TRA	2L	10232710	2R	25187095	8	0	somatic_tumour	14954.4	2L:10232710 2R:25187095	0.27	0	-	-	CTACGATCTTGCCGAGAAGCGATTCTACGAGGGTCCCCAGAAGGTAAAATCTCTAAGCAATCACAGCCATAAGTACTTAAGTTGTTAGCCAGTTGGAGGACTCAAGCACCGAGCCTTAAACTTTCTCAACTGCTGCGCATGTATTACTCAACAAATGGTGTCCTTAGT	-	eEF1delta, intron	CG9380, exon_2	eEF1delta, CG9380
P7	novobreak	TRA	2L	10272992	3R	22714734	3	0	somatic_tumour	12441.7	2L:10272992 3R:22714734	0.1	0	-	-	TGGAAATCTCATCCAGCTTCCGTTTCTTCTTGCGATACTGCCGCGTTATTTTCGCCAGTCGCATACGCATACTAATGATACCTCGCATTGTCCGCAGTAATGGGATG	-	Utx, intron	wge, exon_5	Utx, wge
P7	novobreak	TRA	2L	10370395	2R	22650212	3	0	somatic_tumour	12279.8	2L:10370395 2R:22650212	0.09	0	-	-	GTCGGAAACGCTTCCGACCATAAACATAAACAAATCGGTCGATGATCGGTGCGGTCATCGAGGTCGTTAACCGAGAAGTACTTGATGCACCGCAACGGCGGACGACGGG	-	rho-5, exon_2	intergenic	rho-5
P7	novobreak	TRA	2L	775139	3R	5181428	3	0	somatic_tumour	4406.3	2L:775139 3R:5181428	0.08	0	-	-	TGTAGATACCCAGCTTCTCCTGACCAGCTCCCTTGGCCGCGACGATGGATAAGCCCATGCCGTTGCTGTTCTTGTGTAGCTTAAAAAGCGCGAATTTAGTCGGCAGCCAGCTCATGTGTGTGAGTGTGCG	-	intergenic	cno, exon_11	cno
P7	novobreak	TRA	3R	10500610	2R	13698093	3	0	somatic_tumour	3197.5	3R:10500610 2R:13698093	0.09	0	-	-	TGCCTTCACTTACGCACACACACCTTCGCCCGCCGTACAACGGTGCGTATGCAACCGCTGATGGAAGTGGAGATGCAGATGGATGTGGCACTGGATGTGGATGTGGATGCGGATGAGCACTGGGAGACGGTACTG	-	intergenic	fas, intron	fas
P7	novobreak	TRA	3R	10505784	X	18303974	3	0	somatic_tumour	7798.2	3R:10505784 X:18303974	0.12	0	-	-	CACCGGGAGGAAGGAGGAAGGAGCAGGTAGTAGGTAGAGTCGGGCGGTGCGGCCGGGCCGCATCTCCGCCACGAAAGTGCGTCCCGTTTCGAGCCCAGGGG	-	intergenic	intergenic	-
P7	novobreak	TRA	3L	12178302	2R	13922941	3	0	somatic_tumour	1744.6	3L:12178302 2R:13922941	0.08	0	-	-	GATCTTAGCTAATTCAGTGGGCAAACCAGCCTAGTCAATCAGATTTAACAGCCAAATTGAAACTTATAGAGATAAATTGAAACTGAAATCAGACGCAGCTGCACCA	-	CAH2, intron	shot, intron	CAH2, shot
P7	novobreak	TRA	3R	15723838	X	20082047	4	0	somatic_tumour	4358.2	3R:15723838 X:20082047	0.14	0	-	-	AAAGTCCTCGGGGATCGGAGAATCGGAGAATCGGAGGCACCCTGGCCAATGTCCGAAAGGAATCAACCGGCAGCTGGTTCCAAAAGCCAACAGTTTTGCATATTTCATATTTAGAATTTGATGCGCCACAGCGGGCTGTGCC	-	intergenic	intergenic	-
P7	novobreak	TRA	2L	11173435	2R	11436869	3	0	somatic_tumour	263.4	2L:11173435 2R:11436869	0.09	0	-	-	TGTTATGATTTTTGGAATTTTGTGAGACCGCCCCCGCATGTGTCAATCTTAGCCTTTGTTTTATTGACTAAGCATACAATCCGTAGGCCTTCACTTCTCAAATAT	-	Ca-beta, intron	CG7777, intron	Ca-beta, CG7777
P7	novobreak	BND	2L	11430408	2L	16208470	4	0	somatic_tumour	4778.1	2L:11430408-16208470	0.08	0.01	-	-	GCCACATGCCACCCAAACCATGTCACCTCCCATCGAAGGGGTAAGCAACCAAGCAGTAAATCGCGCTGACTGCAATTTATTTAATAAAAAACGCAATGTCGACGACCCAAGCAATTGAAAC	-	intergenic	intergenic	-
P7	novobreak	TRA	2L	11635382	X	14654037	4	0	somatic_tumour	3018.7	2L:11635382 X:14654037	0.14	0	-	CTGAACAA	GCAAACAGAGGGTCCGAAATTCAGCGAGTTGCTGATCAACCGCCAACAGCAAACAGTCGCAAACGCACTGAACAAAGAGAGAGAGAGAGAGCGGTTTGTTGTTGTTGTGGCAGCGCAGCATCAGCAACATAA	FoSTeS	intergenic	intergenic	-
P7	novobreak	TRA	2L	11956048	X	15817056	3	0	somatic_tumour	3861	2L:11956048 X:15817056	0.12	0	GAACGA	-	ATAAATGTATCTTTGAGATCTCTGCTGGTTCTAATTGTCCAAGATGACAATGCAGATTGGATTGGTAACGGTAACAGCACGCACACTCCAACAAGAAACAGAAACGAAGAGCAGAGGAACGAGCAGCTGCGTGTTGAGTTTTCGAGGCGGAAAT	Alt-EJ	CR43314, exon_2	sd, intron	CR43314, sd
P7	novobreak	TRA	2L	12034802	3L	5489988	3	0	somatic_tumour	6544.8	2L:12034802 3L:5489988	0.11	0	-	-	AGGAGCAACCCCACAAAAAAAAAACAGAAAAACTTCACCTACGAAAATATTTCAGAAAGTGGGTGCTCAGTGCGGCCATACTCACGTCAGCGGTGCTGACCCTGCTAACTCCCACTGCAGTGCGACAGGGCGGTCTGTATGCC	NHEJ	CG18788, exon_2	intergenic	CG18788
P7	novobreak	TRA	2L	12077864	3L	19491933	3	0	somatic_tumour	7414.1	2L:12077864 3L:19491933	0.16	0	-	-	GGGCAATGGCAGTGACGGCATTCGACTGTCGCCACAAGGCGGAAATGAGCCAACTTGGCTGCCACATGGGGCGCAAAAGACGCCGGCTGACAATATCCGATTGAAATTTTGGTAAATGAAAAATATTCCAATATTTTCTAGATATTGTTTATAAC	-	intergenic	intergenic	-
P7	novobreak	TRA	2L	12380393	3L	19498719	3	0	somatic_tumour	7118.3	2L:12380393 3L:19498719	0.09	0	-	-	GCTGTAAGTATGTAATTCGCATTTTAGTGCATTTTGATGGCCGGGAATGAAAGCGGGGCATCTGAGCCTCCCAAACATTCAAGGCGGATAGCACATTTGTGATGGTCCAATCG	-	bru2, intron	CG9451, exon	bru2, CG9451
P7	novobreak	TRA	3R	12351025	2L	12910773	9	0	somatic_tumour	559.7	3R:12351025 2L:12910773	0.32	0	-	-	TAGTCGGTGATCCTTGCTGAAGGCGGTTGAACTATAGGTCTTAATCAAGACTATATAACTTATGGTTCTCATTGTCAGGTTCTCATCACCAACTTACATATTATTTTTTTTTCGACCGTAGGAAAGTAATCCGTACAGCTTCTCTTTTGCCACATTCATCAAGGGAGCTCCAGAATCTCCCTGAAATGTAAAAT	-	CG10041, exon	intergenic	CG10041
P7	novobreak	TRA	2L	13256942	3L	10524216	3	0	somatic_tumour	2732.7	2L:13256942 3L:10524216	0.09	0	-	-	GACAGCCATAAACGAGTTGCTGACATCATCGGCGGCTAGCAAACCTGGCCAAGTGGCCACCGTGGCCGGATGGGGAAGTCTTCGGGAGAATGGACCACAGCCTGTC	-	CG31728, exon_4	Rbfox1, intron	CG31728, Rbfox1
P7	novobreak	TRA	2L	13400090	X	16446231	3	0	somatic_tumour	3046.1	2L:13400090 X:16446231	0.15	0	-	-	CCAAATTGCCCACAAGCAGCTAGTTAAGACTACTCAAGCTTTATGTTTCAGCTCCAGGCCCTTGGTGAGCGATGCCTTGACAGCGTCGATGCCCTCGTAACCGTAGCAGGAGCACTCGATGTCCGCACGGATCTTGAC	-	CG7110, intron	eIF-2alpha, exon_1	CG7110, eIF-2alpha
P7	novobreak	TRA	3R	23152458	3L	17334887	4	0	somatic_tumour	5817.6	3R:23152458 3L:17334887	0.12	0	-	-	ACTCGATACAGCGAAATGAACAGAGTTTAATGAAAATGTTAACCAAGCAACTGGCGAGGACCAGGTCCTCCTTTAAACTGGAACTACACAAATTGCTTGCTTAAAAT	-	unk, 3UTR	intergenic	unk
P7	novobreak	TRA	2L	13724341	X	14775902	4	0	somatic_tumour	1051.6	2L:13724341 X:14775902	0.25	0	-	GACAG,TGTT	GACAGTTCCAAGTGAAATTAAAAACCGAATTTCCAGTCACACAATGCCCACCCTTTGGAACAAATTGCTTCTACAATCACCGTTCTCTGGCGGGTGATAACCTGTC	FoSTeS	intergenic	CG5334, exon	CG5334
P7	novobreak	TANDUP	2L	13879502	2L	14567889	5	0	somatic_tumour	688.4	2L:13879502-14567889	0.1	0.01	-	-	GCAAATGCCCTGCAAAGTGTCGATAATTACCTGTAAAAGTTTGAGCCAAGAGCAACAGTTAACACAGCAGCAGCAACATGTTGGCGGTTAAGAACTTCTTCCTGCCGGAGAGGGCAAAAGCTCCGGAGACTCCACAACGATTCACACGACTGCCAGAGGCGAGCTGTCAACGCCTTTTGGTGCCAGCAAGTTGCAACTGC	-	CenG1A, 5UTR	intergenic	CenG1A
P7	novobreak	TRA	2L	14071477	X	1911534	3	0	somatic_tumour	12159.9	2L:14071477 X:1911534	0.17	0	-	-	TCTTTAAATTGCTCGGATGCCCAGCTGGAGAAGGCGACTTCATCACCTCCGACCGGGTAATGCTATGGACAGATGAGGGAAAGGGCTACTTGTACAAGCTGCCCGCAAACTGCATTCCCGACAACAAGGAGTTCCACTCGAAGAGTGTGGTCAGGGATGCAC	-	nAChRalpha5, intron	Rbcn-3B, exon	nAChRalpha5, mip130, Rbcn-3B
P7	novobreak	TRA	3L	14708172	X	1911665	3	0	somatic_tumour	12796.5	3L:14708172 X:1911665	0.13	0	-	-	CCCGCAAACTGCATTCCCGACAACAAGGAGTTCCACTCGAAGAGTGTGGTCAGGGATGCACCTCTAACCTTGGTCAAAGTTTTAGCTTGTTTACACAAGAGTGTCAGAATCGGCCAGACAAGTAAACATGAAAGCGAGAGCAAA	-	ome, intron	Rbcn-3B, exon	ome, mip130, Rbcn-3B
P7	delly	TRA	X	1911425	2L	12860859	4	0	somatic_tumour	10949.4	X:1911425 2L:12860859	0.11	0	-	-	AATCCAAGGAGATCCGCTGCCTGAATGCCATCACCATGAATTGCTGCGCCCAGAACACCATTTTTTTTTTTTAAGTGCGTGCGTAGCAAGTGGGGTATTC	-	Rbcn-3B, exon	intergenic	mip130, Rbcn-3B
P7	novobreak	TRA	2L	14178344	X	1814038	4	0	somatic_tumour	12364.3	2L:14178344 X:1814038	0.14	0	ACGAAAC	-	GCATTATAGACAGCTTAACAAATACAATCAATACCTTCACTTTCGTGTTATTCGAACCAGTCTAAAAGAGTTTCGTTTTGCTGTTTGTTTTTTTTTTGGTTTTAGTTAACATATTTA	Alt-EJ	CG43333, intron	CG42666, intron	CG43333, CG42666
P7	novobreak	TRA	2L	14178344	X	1814038	4	0	somatic_tumour	12364.3	2L:14178344 X:1814038	0.14	0	ACGAAAC	-	GCATTATAGACAGCTTAACAAATACAATCAATACCTTCACTTTCGTGTTATTCGAACCAGTCTAAAAGAGTTTCGTTTTGCTGTTTGTTTTTTTTTTTGGTTTTAGTTAACATATTTA	Alt-EJ	CG43333, intron	CG42666, intron	CG43333, CG42666
P7	novobreak	TRA	2L	14400065	3R	13771599	3	0	somatic_tumour	628.5	2L:14400065 3R:13771599	0.12	0	-	-	GTTTCTGACAATCTCATTAGCTGGGATTCTTTAATACATCAAGACCGTTGAGTTACGAATTGGTTTTGGACCGGGAGAGATCGTCTCGTATACTCGTGTACGGCAAACCGAAATTTCCTTCCTTCAGAC	-	elB, intron	CG9297, exon_1	elB, CG9297
P7	novobreak	TRA	3R	11087993	X	17037396	3	0	somatic_tumour	5949.4	3R:11087993 X:17037396	0.13	0	-	-	TGCTGCTGCTACACGCCCAGTAATTGCCATTGCACTTGTTGTAGATGTAGTCGTTGTAGTCCTTGTCCAACGCCTGTCACGGAAACTTATCCCTCATTGTCCTTGCCCTTCGCCCCGACCCCCCAACCGCCCACTCCATGTCCTTGGCTCG	-	intergenic	CG45002, intron	CG45002
P7	novobreak	TRA	X	17039927	3R	13773055	3	0	somatic_tumour	3266.9	X:17039927 3R:13773055	0.12	0	-	-	CATGTTTGCAAAACAGCAAAGAAAAAGAAAAAATTGAATGATAAATGAGCAACGGCTTGATTTGTTTTCTCACGCTGCTGTTCTGGGCTTTGATTTTGTTTTTTTTCGGTGCCGAGTGCCAAAAACGGGGCCGCAGGGCGTATGATTAATATGCGTGAATTAAGTCAAATCGAATCGAATCAATCAAGACGACAACAACACCAACAAAAACGGAGTGTAGCATGAAAAAG	-	CG45002, intron	CG9297, intron	CG45002, CG9297
P7	novobreak	TRA	2L	14417213	2R	8193167	9	0	somatic_tumour	6224	2L:14417213 2R:8193167	0.23	0	-	-	TATTTATAATTTCGCAATCAGATTCATCCGAAACGTCAAGGCTATTTTCAGTCCAGTCGGCAATACTTGTAGAATGGATTTCATGAGAGTCTCGCAGTTCTCGTCGCCAGTGCCTTGGCTATATCG	-	Pburs, exon_1	LRP1, intron	Pburs, LRP1
P7	novobreak	TRA	3R	29825658	X	8015188	4	0	somatic_tumour	21810.5	3R:29825658 X:8015188	0.17	0	-	-	GCGTTTGGGTGAACAGCCTCCCTCTGCCTCCGCCCATTTTCGTCTATATATGTACTGGAACACACCTTTCCCCGGATCGGTCATCATCATCATCATAATCATCATCTGTATCGAATGCGACTATCCTAATTAAGCACTATAATTTAT	-	neo, 3UTR	Tbh, intron	neo, Tbh
P7	novobreak	BND	2L	15560997	2L	19547841	2	1	somatic_tumour	3986.8	2L:15560997-19547841	0.14	0	-	-	GGTTAAATCAGGCATCTTGGGTCAACTTTGGGGCTGCGTAAATTAGCAGCCAGTTTTTCGGCTCTCCAAACTTAAAATATACCGACTAGGAATTTGGAATAATAAAACATTTTGTTCAGC	-	kek3, intron	intergenic	kek3
P7	novobreak	TRA	3R	18423017	2L	15785953	3	0	somatic_tumour	2637.1	3R:18423017 2L:15785953	0.09	0	-	-	CTATAAGAGTTAACTCTCGTAAATTTTCAGATATCAAATGTAATAAAATAACAATCGATGCAGCGACAATTTGCGCACCCACTGCAAGTTCAAGCATCCCATGTACAATCC	-	fru, exon	CG18109, exon	fru, CG18109
P7	novobreak	TRA	2L	16494892	2R	23582411	3	0	somatic_tumour	7087.5	2L:16494892 2R:23582411	0.09	0	-	-	ATATTAAATATCTTGATTGTTTCGAGAAGCTCTGAGCGGATGTTGTGGCCGACGATTGATAAACTCCAAGTTTTATATCATCGCGAATGGGCGATGGCTAAAGAA	-	Tpr2, intron	apt, intron	Tpr2, apt
P7	novobreak	DEL	2L	16509529	2L	21146467	5	0	somatic_tumour	4636.9	2L:16509529-21146467	0.13	0	-	-	TATTTATAGAAAACATTAGGCGAATGTGTATTTTGTTAGCGTGAATTAATTTATTCTGTCTGTGTAATGTTTAGGCGTTTTCTTTTTCGATTGGCTTAAGTGTTTCTGTGGAAGGCTCGGGTTTGGGTAACTGCTCTGCAGTTTTCGCTTCCTTCCTCGGTTCGTCCTCAGGCACATTCTCATCGTCGAGTCCATTCCAGGAGGCAGCCACCGAGAGC	-	CG5953, 3UTR	del, exon	CG5953, del
P7	novobreak	TRA	2L	16567620	3L	25334312	4	0	somatic_tumour	8766.7	2L:16567620 3L:25334312	0.18	0	-	-	GTTCTATCTCCTTCTCTGTCACAGCTGCTGCTGTCTCTTACTCTCTGTCTTTCTATCTCCCTCTGTACACCCGGAAGAATATTTGTTTTTAAGCACTAAAGTATCTGAACACGATTTGAAATTATTAAAAAACCACGCCTTAAGTG	-	CG42389, intron	CG45782, intron	CG42389, CG45782
P7	novobreak	TRA	2R	13604000	2L	7298204	3	0	somatic_tumour	6305.8	2R:13604000 2L:7298204	0.09	0	-	-	GTGGTTGGTTGTTCGCTGCATTTCTCATACGCAGTGTGTCCCATCAGCAGTTGTGGCTTCTGCTGCTTTTTGGCATTTTTGTGTACGCATTTCATTTGGTT	-	intergenic	intergenic	-
P7	novobreak	TRA	2L	17692544	3L	6761859	4	0	somatic_tumour	10930.7	2L:17692544 3L:6761859	0.16	0	T	-	GGCAAATACCCAAGTAAATTCGAGTGCAACAAGGGGCGGGGTCGCTGAACTCCAAGGAGTCACTCTTTTTTACTGGCAATGAAGAAAGGTCAGTGAATAGATGAAAGATTATTGTA	Alt-EJ	CadN, intron	CG32392, intron	CadN, CG32392
P7	novobreak	TRA	2L	17726659	X	21570749	3	0	somatic_tumour	3844.1	2L:17726659 X:21570749	0.13	0	-	-	GACATGTCACACACACCAACACACACAGCCCCCCCTTACAAAGTTCCGATGACTGACAAGCTTTAGCTTTAAGCCAGCCTAATCGATGAAGATTTCCGAGCGGATTTGC	NHEJ	CadN, intron	intergenic	CadN
P7	novobreak	TRA	2L	17918519	3L	22565067	3	0	somatic_tumour	4646.5	2L:17918519 3L:22565067	0.1	0	-	-	GGCACAGATTTACCGACCCCCTTCCACACTATCTGTCCCTTTTATCACTCCTCGCTCCGCCAACTGCCACAATAAATAAACAATGCGAACAAAAGAAAAAGTAAAAAATCAAACTCAGCAATTAGATTATTTCTAAAGAGTAC	-	intergenic	intergenic	-
P7	novobreak	TRA	2L	17933410	3R	6473122	3	0	somatic_tumour	11460.3	2L:17933410 3R:6473122	0.08	0	-	-	AGTTGACAGCGTGGAGCGTGGCAAATATTTAGACCTTAATGAAATGAAAACAAAGTTGGAAAAAAGGTAATGAAACGACGAAGCGAGCAGAAATTCATGCCAAGTCCGCACTTCATGGCAACGCTTTGAG	-	intergenic	intergenic	-
P7	novobreak	TRA	2L	17981161	3L	4587251	3	0	somatic_tumour	13393.9	2L:17981161 3L:4587251	0.08	0	-	-	CGCTAAGACGCTCTTTAAATTGTTGTCCTCGCTTGGGCACATGCGAATCTCCAAGCCACGGGTGCTTTACGTAGTTTGGCCAAAATAGGCGAGTGAGGGAATCGCAGAGCTGCCAATATTTTATTTTGCGTGCACAAGGGAAACGAGAAAA	NHEJ	btv, exon_5	CG42540, intron	btv, CG42540
P7	novobreak	TRA	2L	18139645	2R	4431052	3	0	somatic_tumour	13708.6	2L:18139645 2R:4431052	0.1	0	-	-	GGTAGCAATTCAGATTGGCCGACATCCGACCAAAGGCGGCTGCCATGCGGTTGGGCAGCCTGCTGAGGTCGACCGGATCTTTACCACAATCCCGCCACGGGA	-	Socs36E, exon	Gprk1, intron	Socs36E, Gprk1
P7	novobreak	BND	2L	18249668	2L	18349554	3	0	somatic_tumour	99.9	2L:18249668-18349554	0.08	-0.04	GCTCAAG	-	GGATAAAAAGATCAAAAGTCCTTGCACTACGTATAAAAAGCTTCTTTTGGTGATTTCGTTTTGAACCTTGAGCCTAAGCTGTTACCTGCTTTTATTTACTCC	Alt-EJ	CG42750, intron	Fas3, intron	CG42750, Fas3
P7	novobreak	BND	2L	18885742	2L	19598141	4	0	somatic_tumour	712.4	2L:18885742-19598141	0.1	-0.05	GCCA	-	GTTGGCGGGCCCACAAAAAAAAAAAAACAAAAACAGGAACGTAGAAAAGCGCACTCATCATAAAAATAAATAAGCCAACGCGTGCGCGACATTTTCATTGTTAACGCTTTGTTGTTTTAGTT	Alt-EJ	intergenic	Lar, intron	Lar
P7	novobreak	TRA	2L	18949106	2R	17122080	4	0	somatic_tumour	1827	2L:18949106 2R:17122080	0.15	0	-	ACCCTAACC	ATACTGGTGTGTCCTCGTTCTTGGCTTTGTTTACTTACAAATTTTTGAAAGATCACCCTAACCCTACAGGAAATCAGCAGGTGTGATATATTGTTTATAACATTTTGGC	FoSTeS	CG10428, exon_1	CR45272, exon_1	CG10428, CR45272
P7	novobreak	TRA	2L	19319576	3R	14536681	2	1	somatic_tumour	4782.9	2L:19319576 3R:14536681	0.12	0	-	-	AAGGAACCGAGTGCACATCTGCATATTATTAATGACCGGTAATTACCTAGGCGGAGTCTGAGGTGGGGAATCCCACTTTATGGGATGGAATGGGATGGGTTGGGGTGGTGTGGTTCGTTTTCCTGAGAAATTGCGAACATCACCGCCAGGGGGCGCCTCATGCAATTTCCCGGCTAATGACTGGCCATCCCAGGCAGAAAGTACGTGTTTTCGATGGCAAAATTGAATAACAAACACGCCGCCAGAC	-	intergenic	Pde6, intron	Pde6
P7	novobreak	TRA	2L	19462745	3L	17190980	3	0	somatic_tumour	2271.8	2L:19462745 3L:17190980	0.15	0	-	-	GCATAAAAATGCACCTGTGCACCATGGAATCCTTTGGCCCAAGCAAACACACACATGCCCATGGAGTGGGCCAAAAATTTCCATAGACATAGACGAAAGCGACGGGGGCGGTGGCGAAG	-	intergenic	Rbp6, intron	Rbp6
P7	novobreak	TRA	2L	19472495	3R	10328915	3	0	somatic_tumour	9143.6	2L:19472495 3R:10328915	0.08	0	-	-	ATTATTGTTTTTTCTTCGCTTCGAGCCGGGTGTTTTCTTTCCGCCGATTCGGCATTTTCATTGTTTTGTTCATTTTCATTCCATTTTTTGTTGGTGCGAGCTCGTGCATTCGGTAGCACAC	-	intergenic	Bruce, exon_3	Bruce
P7	novobreak	TRA	2L	19515803	2R	15205313	3	0	somatic_tumour	4310.5	2L:19515803 2R:15205313	0.11	0	CGT	-	CCTCTTTACATGTCAGTAATTCTCAGCAGGAGCATGCCATCAACAGCAGCGTCGGAGGAGCACTTCCTCAAGCACTTCTGGCCGAGCAGCGTGGCCTGCTCCTCGTCGCGTGGACACTCGGTGGAGGGTGAGTTGCGAGGATTCTTGTAGACGCGGCCATCGTCGTCAGACTCCAGAGAGTCGTCGTCCTCCTCCCAGTCGTCGTCGTCGTCATCCTGCTGCGGAATCTCCGAGGTCGTCTGG	Alt-EJ	Hasp, exon_3	Ir51a, exon_1	Hasp, Ir51a
P7	novobreak	TRA	2L	19628390	2R	23232683	3	0	somatic_tumour	3604.3	2L:19628390 2R:23232683	0.11	0	-	-	GTGTGGGACTTAATCCGAACAAATATTGTGTTTCCTTTCGCTTCGAGGGGAATCTGTAGCCAGGCGGCATTTTCAATTTCGCTGAATTGCTCAAAATTAGGAGTCTCACAAAAACACAACTACCTTTCTCCAGGGCACAGACGACC	-	CG46244, intron	CG3092, 5UTR	Lar, CG46244, CG3092
P7	novobreak	TRA	2L	19792664	3L	12384685	5	0	somatic_tumour	7408	2L:19792664 3L:12384685	0.17	0	T	AGACAG,CTGTCT	AGACAGGGGTCGATCACGTGGCCGACTACAAGCCTCCCAAGGAAAACGAGAAGATGGACGAGGAAACCCTGCTTACATAAATAAGTAGACAGCGAGTGGGGCTGTCT	FoSTeS	CG10466, exon	Ncc69, intron	CG10466, Ncc69
P7	novobreak	TRA	2L	19811204	X	10391682	3	0	somatic_tumour	9419.5	2L:19811204 X:10391682	0.12	0	-	-	CATTAGACGAATTAAACTTAATGTTAACTCCCATTTAGCCTACTAGCTGAATCAATAGAATGGAGCAATAAGTTGGTAATTTCATTTCTTGATGAATGCCAGACGTTGCTACTTGTTTAATTATGT	NHEJ	sick, intron	flw, intron	sick, flw
P7	novobreak	TRA	2L	16179327	2R	11318535	3	0	somatic_tumour	4860.8	2L:16179327 2R:11318535	0.09	0	-	-	AAGTAATGATGCATTAAAATCACTTGTAAGTTCAAACTCATAGTTGAAGGTTACTTGTGGTCTGCGTGTCATTGATTTCTCTAGTGTCCAGGTAAACGATAATCCATATAACTACTCTAACCCAGTAGTTGTGATACTAATTACTTCTGG	-	Ca-alpha1D, exon_19	nompA, intron	Ca-alpha1D, nompA
P7	novobreak	TRA	3L	3085633	2R	14153587	3	0	somatic_tumour	11068	3L:3085633 2R:14153587	0.09	0	-	-	TTGCCATTAGTGGCGCTCCACCGAATCCCGCCGCAGCTCCGTTCGTCAGCAGCAAAAATGAGGAGAGCGATGACGATGAGAAGGTGAAGGCGAAACCGGAGAAGCATTCCGAAACGCACAAAAAAACCGATATGAGCGATGTGGATG	-	CG11486, exon_6	pea, exon_1	CG11486, pea
P7	novobreak	TRA	3L	22957247	3R	8474285	4	2	somatic_tumour	14483	3L:22957247 3R:8474285	0.23	0	-	-	ACATCGGTGTTCAGGGCAATTTGGAAGTCCTTCTGAAGGATCGTTGAGTTCGTTGAGAAAATGAGCTGAGTTCAGGCAAAAAAAAACGAAGAACAAGAAGCGGAGCCAACTGGAAATGGAAAACAAAAAGTGAGCAGT	-	intergenic	CG45263, intron	CG45263
P7	novobreak	COMPLEX_TRA	2L	17252110	2R	24133346	3	0	somatic_tumour	6881.2	2L:17252110 2R:24133346	0.12	0	-	-	AACCAGTTTTCCCACGATTTGATGTGATTGTGCCATTGGTAAGCCCACGTTCTCCACACAATTCCCCTTTTCCAATCGCTCGATGATTGTCATCGTAGGTGTGACTAATTGTTGG	-	beat-IIIc, intron	tamo, exon_1	beat-IIIc, tamo
P7	novobreak	TRA	2L	20424190	2R	24129750	3	0	somatic_tumour	3705.6	2L:20424190 2R:24129750	0.11	0	GCG	-	GGAGGTGGGTGGTGGATGGGCGGGATAGTGAGGATGGGAAGGAGGAGCTCCAGACAGGAAAAGGGCTTGGCTCGCATTAGGGTGACAGCGGGAGTGACGGCAGCGGGATACGTCTGCACTTGGAAGGACATCCTACAGTTCCGCGAGCGTTACGTGG	Alt-EJ	CG15130, intron	tamo, exon_4	CG15130, tamo
P7	novobreak	COMPLEX_TRA	2R	24126253	3R	17871707	6	0	somatic_tumour	6254.5	2R:24126253 3R:17871707	0.22	0	-	-	AGACAGGAACAAGACGTTCCCGAGCGCCAAGCGGATGAGACAGCGAGCTGGTAACAAAGCGACAATATGAATACTATCTAATGTATGATACGAATGAATACTATCCA	-	CG43776, exon_1	tinc, 3UTR	CG43775, CG43777, CG43776, tinc
P7	novobreak	COMPLEX_TRA	2R	24128278	2L	11977523	3	0	somatic_tumour	12150.8	2R:24128278 2L:11977523	0.11	0	-	-	GTCTAAGCATTAAATCAACCAGCAGCTGTAAAATTACAGCCGTTCGTTATGGACAGCGAGCCTAGGTCCAAGCTCTGCACCAGCAAGTCCTCGCGGTCACCCAGGTC	-	tamo, exon	intergenic	tamo
P7	novobreak	TRA	2L	20495067	3L	5238975	5	0	somatic_tumour	15256.1	2L:20495067 3L:5238975	0.22	0	A	-	AACCGAATCAATGTGCAACGGGAAAAGTTTTAGGCCAAAAACTTGGAAACCCTTTTACCCTAACCGAAGGGCATTCGAAACCACCAAATCGGAATATATATTTTGTATAAATAGAAC	Alt-EJ	CG34007, 5UTR	shep, intron	CG34007, shep
P7	novobreak	TRA	2L	20674142	3R	26004104	6	0	somatic_tumour	5330	2L:20674142 3R:26004104	0.28	0	-	-	GCCCCCGGCAATGGCCAACATTGCGGCACTTAGTCAATCTTGGAGTGAACTGATCGCCTTTCAACTGGTCCATCGCAAAATGTTTAGCTGGCGCTTTGCTTTTGTTGCCTATAAATAGAAC	-	CG31678, intron	intergenic	CG31678
P7	novobreak	TRA	2L	20828628	2R	11873809	7	0	somatic_tumour	8954.8	2L:20828628 2R:11873809	0.32	0	-	-	GTATTGAAACGAACCACAGGCGCATGAGCCGGCAGTCGACGGATGCGAGAGATGACCAGCTTGATGTCCGCAAGACCTGCGTGCTCAGGATACTGTTCCAGTTGTTCCAGCACACGCTTCTCTATCCGCTCCATGACGGAAGAAGAAAACGTTTTCATTGCATACAAGTATATGTC	NHEJ	intergenic	CG13185, exon_8	CG13185
P7	novobreak	TRA	2R	19019261	3R	28186278	3	0	somatic_tumour	9167	2R:19019261 3R:28186278	0.09	0	-	-	CAGGAAATATGTTCGGAAGCCGTAGCAGGAAAAACGGAATCCGCAAAACTTTTGCCAGCAAGTTTGAGTTTTTTCTTCCGCTCTGCCGTTCGTGCTTGGCCCTG	-	intergenic	CG34354, intron	CG34354
P7	novobreak	TRA	3R	28188345	X	15489595	3	0	somatic_tumour	12698.8	3R:28188345 X:15489595	0.16	0	-	-	CTTATCAATAATTTATTTATAAGCTTCACCTCAGAACACATGTTGTCAGTATGCCATGTTGGCCTCAACAGCCTCCGTGTCTTGCCGTCGCTTTCCGTTTCGTATTTTGTGTTTTATGGCCCTCGTCCCCATCTCCATCCCCATTCCCATTCCC	-	CG34354, intron	Gmap, intron	CG34354, Gmap
P7	novobreak	TRA	2L	21740345	3L	10584553	4	0	somatic_tumour	11155.8	2L:21740345 3L:10584553	0.21	0	-	-	CGTTATGTACAAGACAAGGTGTTATTTTCTGTATACGAAATGGATAGTGCACAGCAGTGTATTATAATATTTACTTATATATCAAGAGAGAAAACTAACCGCATGCGTTTTATGTTCTTTT	-	step, 3UTR	Rbfox1, intron	step, Rbfox1
P7	novobreak	TRA	2L	22041503	X	15476281	3	0	somatic_tumour	6565.2	2L:22041503 X:15476281	0.1	0	TGATGG	-	GTTAGCCATCGTCACATTTTTTTTGCCGGACCAACCTGCTGAATTGATGGTCGGCGTTGGAAGAAGTGGAGCACGCTTGTTCACCTCCGGCTCATTCTGTGTGTAGTAGGGATCGTTGTCCATGTTGTTCATGCCGAACGATATTTCTAGGCTTTTAGGC	Alt-EJ	CG31601, exon	CG6324, intron	CG31601, CG6324
P7	novobreak	TRA	2L	22997150	X	22671759	3	0	somatic_tumour	325.4	2L:22997150 X:22671759	0.19	0	TCTAC	-	TCAACTTAATAGCTCAAATCAATAAAATAATGAAAACTCAACAGAAGATCTACTGGAGTGCAGTTCTTTCATGTTTAAAAGATATTGGCTTAGTTCAACTA	Alt-EJ	intergenic	CR44997, ncRNA	CR44997
P7	novobreak	TRA	2R	335228	2L	3069253	3	0	somatic_tumour	2734	2R:335228 2L:3069253	0.1	0	-	-	GTCTTAGATCTTGCGATCTTGAAGCGCTTCCCACGCCGAAGGGAACCCCTCATTCGTAAGAGAATCCGAAGGGAAGTACTTTTTTAAACGGGCGCGGACGAGGATCGAAGCCACACAC	NHEJ	CG45781, intron	toc, 3UTR	CG45781, toc
P7	novobreak	TRA	2R	3524816	X	4602283	5	0	somatic_tumour	1077.5	2R:3524816 X:4602283	0.22	0	CTGG	-	GGAATGAGAGTCAGAATTTCGTTGTTGATTAACGAATCGAAATTCGCCACTGGTTGCCTTGGCCGATTCTTCACTGGTACATAGAGCCCCCGTTTATATACC	Alt-EJ	CR41501, exon_1	CR32773, ncRNA	CR41501, CR32773
P7	novobreak	TRA	3R	14400705	2R	12544913	7	0	somatic_tumour	1855.8	3R:14400705 2R:12544913	0.18	0	-	-	TCCATGGATCAATTTGAAAGTTTAACAACTGGCCATTAGCACTGGAGCGAACTATTTCTCATTCTCATTTCCATCGTCGTTCTCATTTCGCTGTGAGCCGGAGCGAATATGGGGGGCACCTGTCCAGGTTTCCTTCCATTTTCCACTGTCTTTGCAGTTATTTAT	-	cv-c, intron	fra, intron	cv-c, fra
P7	novobreak	TRA	2R	5808875	X	15879182	3	0	somatic_tumour	10070.3	2R:5808875 X:15879182	0.18	0	-	-	TCTCCGGGCTTTGTTTATTCTGGTGGTAGTAGATTTCCCACGCGATACGAACGTGCATGGCATTCCAGCGACCCCAGGAACTGGCTGGACGTGGGTGGTGTCGAGAAGAAAGTGAAGGGGAAGGGG	-	dpr12, intron	tay, exon_12	dpr12, tay
P7	novobreak	TRA	2R	5894879	2L	2397528	5	0	somatic_tumour	3497.4	2R:5894879 2L:2397528	0.16	0	-	-	AATTAGCATATGCCTCCATTTAGGACTCAACTCTTTGTCCGTCGTGCAACAAGAACGGGAGCACAAAAAGTCAACGGCAGCAGCGGTAACAGCATCGGACTAGCAACACCAGCAAGTGCAGAAGAAACACGTACACACGCACACAGTGAATT	-	CG43366, intron	VGlut, intron	CG43366, VGlut
P7	novobreak	TRA	3L	6324285	4	729789	4	0	somatic_tumour	5594.5	3L:6324285 4:729789	0.1	0	-	-	AATCTAGTATACCAGATTTCACTCTACGAGTAACGGGTACAGACAGTCGGTCCGGATTCGGTGGCCGGGCCACTTAATCATCGAAGTCGAACCAAGCAGGACAAATGCCATGCACGACTTCATTATTAGGCAGCCCCATATGCACATCATCATCGCCGCTGAATCGTTGCCATGGACTCGTG	-	intergenic	bt, intron	bt
P7	novobreak	TRA	2R	5992659	3R	13813479	3	0	somatic_tumour	7820.8	2R:5992659 3R:13813479	0.13	0	-	-	CTCCAAGCGGAGACATTTAGAAACAAATAATTTGATTTCCAGTGACGCGACAGTGCTGAGTTATTTTGGTTACGTGAACAAATTAATACAACCTGACATTTTGTCAGTAACAGCGACGAGTTAATTGTTTTCAACTCCTCGGTTTTGTCATTCAAGTATTTTTGGTCAATACACGGCATACGAA	-	Src42A, intron	tal-2A, 5UTR	Src42A, tal-3A, tal-AA, tal-1A, tal-2A
P7	novobreak	COMPLEX_TRA	2R	6618618	3L	4022987	3	0	somatic_tumour	2595.6	2R:6618618 3L:4022987	0.08	0	-	-	AACAAGATCACCTTGTACCTGTGTGCGCCAGATTAGCACACTCACCAACGGTGCCCAGGCCATCGAGTTCCAGGGGCAGTGCATGATGCGACGCCGCAATAGCC	-	jing, exon_6	CG11594, 3UTR	jing, Mul1, CG11594
P7	novobreak	COMPLEX_TRA	3R	7005933	2R	7850976	3	0	somatic_tumour	845	3R:7005933 2R:7850976	0.11	0	-	-	CCTTCACCTTGCTCTCTTCGGTTTCTATTCCATGGCAGATACTTGACGACATCCTTCAGCGGGACCTTGAGTGTCAGCGGATCGAAATGGGAGAGTTTTCGCGCGAGGAGCTTAATGTCAGCTGCAAATGAAAGGGT	-	intergenic	Dgk, exon_8	Dgk
P7	novobreak	TRA	2R	6855417	2L	911647	7	0	somatic_tumour	5943.8	2R:6855417 2L:911647	0.21	0	-	-	CCTTGCAAACACTTTTTCACGCTTGATTAATTTTGGTTCGGCAGTCGCTAGGCATCCGGAACGGAAGTGGAGCACTCAGCGGCAGCGGAAGAGCCACAACTTGAGCCATTTGTCAGCTGGTGGCACTTGGCTGGAGCCACGGTCTGGTAT	-	intergenic	intergenic	-
P7	novobreak	TRA	2R	7288520	2L	7256491	3	0	somatic_tumour	32	2R:7288520 2L:7256491	0.08	0	-	-	GAGACAGCTTCCAGCATCACTGAGTCAGCGAATAGCCGACTCGATGACACCTGTCGCATTGATCGCTGGTTTGGCGCCTTGCGAATGGCCTCGTTGTACTTCTGTCTC	-	pwn, intron	Wnt4, exon_3	pwn, Wnt4
P7	novobreak	TRA	2R	7317301	X	15748502	3	0	somatic_tumour	8431.2	2R:7317301 X:15748502	0.11	0	-	GGAAGTGAAAGGTT	TGATGATGATGAACGAATCTTGGGCAACCTCTGCGAATCTGGACCTGCAGGTGTCAGTGTGAGTAGCCAACGGTATTGGAATGGCCAAGCGGAAGTGAAAGGTTATCGGCAAAGGCCTGCACTGCCAGGCGGGACT	FoSTeS	intergenic	Tcp-1zeta, exon	Tcp-1zeta
P7	novobreak	TRA	2R	7358331	X	15895290	1	2	somatic_tumour	8537	2R:7358331 X:15895290	0.16	0	-	-	ACCAAGCTGGATCTGATGGACGAGGGCACCGATGCACGCGACATTCTGGAGAATAAGCTGCTTCCGCTGCGACGTGGCTTCGGTTCCTCCAAAGCTGAATCTCTTGGAAAGAGTTCGAACAATGGAGGTGTCTGTGGGCACCAAATACGCC	-	Dscam1, exon_6	shi, exon_4	Dscam1, shi
P7	novobreak	BND	2R	7680308	2R	15693666	3	0	somatic_tumour	8013.4	2R:7680308-15693666	0.06	0	CCA	-	TCGATTTCGATGGAGTTAAACGCTACCTGCAGCTGGGCATCGTGAGCTATGGAATATCTCAACCTTGTAAGTAGTTTTTGTCTTGTTCTTAAGTCTATCTA	Alt-EJ	LRR, exon_16	CG30087, exon	LRR, CR44372, CG30087
P7	novobreak	BND	2R	8342068	2R	23836897	2	1	somatic_tumour	15494.8	2R:8342068-23836897	0.07	0	-	-	ATCTAGGGGTTACGAGGAGGCCTGGGAACGGGCGGCAGAATCAAAAGTCGCAAGGGGCTACTGCAACAGCAACGCCTACGAAAACTGCCTTGAATCAGAAGACGATTGTCCCTTCAGCGGGAAGTGG	-	pdm3, intron	CG5549, exon	pdm3, CG5549
P7	novobreak	TRA	2R	8397888	3L	7531805	3	0	somatic_tumour	866.1	2R:8397888 3L:7531805	0.09	0	-	T	GTCGAGAACCACATTACTCTAAATTCTTCTCAAAGAACTTTCTTCGCTTTTGCAACTAAATCGATAACAATTTGATTTCCCACACCTGGGCCATCTGGTAGAAGATGAAGAACAGGCCGAAGAACTTGACGGTGTTCACATCCTTACGCGACTTGTTGCCCCGCACCTGGG	NHEJ	CG2121, exon_3	lqf, intron	CG2121, lqf
P7	novobreak	BND	2R	8694440	2R	20438390	2	1	somatic_tumour	11744	2R:8694440-20438390	0.08	0	TCGCC	-	GTGCGGGCCACATTTCATTGAACGAAATGAAAAAATAATTGAAATATTTGCCAATCAGTAGAGCGAATATGGGCAGAGAGCACAGATAAGGCGACTGGGATCTGAACAGCCTGAACGAGCCGTATCCGCACCAGGGCAGCCGTATTAAGG	Alt-EJ	CG8586, exon	CG12484, intron	CG8586, CG12484
P7	novobreak	TRA	3L	1264570	3R	26637981	3	0	somatic_tumour	25373.4	3L:1264570 3R:26637981	0.13	0	-	-	CTCTTGGGCTGAGTAATTAATTATTCATAATAGCAGGCTATAGATAAAATCTTAGTAATCCACCTGCTGGGGTTTAAAATCAGATATCTGTGGTATCCCACCATTTATCTTCCCATCACTTCTACGTGATCTCCGACAAACATCGCGTATACGCCATGTGTGACCGTAAGGTAACAAACGAACCACCATTCGCTGAATGAAAAGC	-	tfc, intron	CR46233, exon_2	tfc, CR46233
P7	novobreak	BND	2R	8853032	2R	13338036	2	1	somatic_tumour	4485	2R:8853032-13338036	0.1	0	-	-	CAGAATCACCATTCATTCAGCAGCATTCAGCATATGCAAATTTTCTCCGTTCTCTATTCCTCACGCTTTCATCGTTTTCGGTTTCTGACGTATGAATGCTGATGTCAAGCTGCCCTCCTGCTGCCGGCTAATTAGTAAAACTCTCTGCGAA	-	sns, 3UTR	CR44206, ncRNA	sns, CR44206
P7	novobreak	TRA	2L	2138379	2R	5957839	10	0	somatic_tumour	3819.5	2L:2138379 2R:5957839	0.25	0	-	-	TACCCGACTCAGCCGCTTCTCTGACTTCCAACCTTCAGTTACCTGTGCAGCCCAGTTTAGCCATAAGAAACACCACCACCCACGAAATACGCAATGGCAAAGCCAAAAGTCGGCGAATCGCTTCAGGAGCAATCATTAACGTTCTCAGAGGCGC	-	tho2, intron	CG7882, 5UTR	tho2, CR46269, CG7882
P7	novobreak	TRA	2R	9254537	3R	15261644	3	0	somatic_tumour	6007.1	2R:9254537 3R:15261644	0.13	0	-	-	TTACAGTCCCCATTCCCTGGTGACGATGAGGAGGAAGTATTCGATTCAATTGTCAACGCTGCCATAGCCGCTACTATTGCTTGGACTCAGTGAGGTCTGACTGGTGCTTCGCCGGGTGGTGCGTCTATCTACACTGGAGG	-	Pkn, exon_8	Su(var)3-9, exon	Pkn, eIF-2gamma, Su(var)3-9
P7	novobreak	TRA	2R	9806107	3R	14331603	3	0	somatic_tumour	4525.5	2R:9806107 3R:14331603	0.16	0	-	-	ATTTTTCCTCAAACTCCAAACGGGCGCAATGATGAAATGACAGGCGCACGTCAAAAGGCAAAAATCGAACCCCCCCCCCTCCTTCTCCTGCGAAGTGGAGTCCTGCGACAAGTGTCGCTATCTCGGAAC	-	CG1688, intron	NK7.1, intron	CG1688, NK7.1
P7	novobreak	BND	2R	9920812	2R	20076023	3	0	somatic_tumour	10155.2	2R:9920812-20076023	0.08	0.01	-	-	CAACTAGATCGATGTAAATCAAAATTCCTGCCAATGGCAAATTAATTAGCATAGAAATCATATTAAAAATGAATTCACTTCTCTAATTACATTTTCGAACCGCATAAATATTTGAGCATGAGCAGTAA	-	Mef2, intron	intergenic	Mef2
P7	novobreak	TRA	2R	9980635	X	18334791	3	0	somatic_tumour	8354.2	2R:9980635 X:18334791	0.12	0	-	-	GTTTATTTTTATGTTTTTCTTTTTGTTATTCGGCAATTTACAACTAAAAAGTTGCAAGCGGATGTGTGCGTGTGTGTGTGTGTGTGTGGATCGCGGGCTTACGCCTCAGTCTTGTAGGGCTTGAAGAG	-	eve, 3UTR	CG6123, intron	eve, CG6123
P7	novobreak	TRA	3L	866729	2L	9983336	3	0	somatic_tumour	9116.6	3L:866729 2L:9983336	0.08	0	-	-	TCGCAACAGTGACGAAATTTCTGAGGCCTCCTCGCTTTCTTCGAGCCCCTCTTTTCTTGTGGCCGGGCAAAGAAGTCGTCTGCGTGCATATATTTTCGCGACTTTAAGTGTACAAAGGCCACTTGTCATCGTCTTGGCAGCCCTTTGAACT	-	CG12502, exon_2	intergenic	CG12502
P7	novobreak	TRA	2R	10243407	X	20347986	3	0	somatic_tumour	10104.6	2R:10243407 X:20347986	0.11	0	-	-	GAGCCATTGTCATATGCCGTCAAAGCTGTCAGCAGCTGCATAATTTCAATTATCGACTCGAGCTATCGACTCCGAGCTCCACTGGGCCACTCCGGAATTCTCGTGCTGCAGATACAGCGGCTCCACAT	-	Hdc, exon_5	intergenic	Hdc
P7	novobreak	TRA	2R	10428179	2L	10871405	3	0	somatic_tumour	443.2	2R:10428179 2L:10871405	0.08	0	-	-	CTCCATATTTGTGTGAACCTCAAGAGGGGCCTTAAAAAAACCTGTTTGGGGCGGGCATTTTCCGGGCGGTAATATAAGCACAACTGATGGTTTGAATGGAGAAAATTGCACAGCGCAAATGGCCGATAGTCGTGGGTGGATAAAGTCGTACGAG	-	intergenic	intergenic	-
P7	novobreak	TRA	2R	10794123	3R	7552948	3	0	somatic_tumour	3241.2	2R:10794123 3R:7552948	0.1	0	-	-	GTTTATTAATGGGTTAAATTGAAATTTCACGCTTTGCTGGCTCCGCATCTCGTTGTCAGGGCTTGGAATAACCTGGCCATGTTACGTCCTTGAAAGCTTTCTACTGTTTGTCTTTCGTTGCGGTCGCAATTTCAACTGAAATCAACATGCAGGA	-	CG33144, intron	intergenic	CG33144
P7	novobreak	TRA	2R	11700529	3L	15203449	3	0	somatic_tumour	3502.9	2R:11700529 3L:15203449	0.11	0	-	-	ATATTTCATATTTCTTAATTGAGCATTCTTGAGAAGGCTTTCAGTACTTTCCTCTTTAGCTTTTTATAGATTTCTTAGCTACGTTTCCTTATTTATAGAGGACAAGGACAGGTAACATTTTTTGTAAAGACTTTACAACATCAAG	-	intergenic	intergenic	-
P7	lumpy	COMPLEX_DEL	X	10639966	X	14498877	6	0	somatic_tumour	3858.9	X:10639966-14498877	0.23	0.03	-	-	-	-	X11Lbeta, intron	intergenic	X11Lbeta
P7	novobreak	COMPLEX_DEL	X	10639966	X	14498877	6	0	somatic_tumour	3858.9	X:10639966-14498877	0.23	0.03	-	-	TGCGATTGAGTTTCCACCTCGGCACAGTGGGCAAAGCCAGCAGCTTTCGATTTAAATTTCACGCCCAAACACTTGCCGCATTGACAGTTATTGGGCGAAACAAAGTTGACTTTTTCTTCGCAGGACGATGGCTGATTGGAGA	-	X11Lbeta, intron	intergenic	X11Lbeta
P7	novobreak	TRA	2R	11826580	3R	28038328	4	0	somatic_tumour	16211.7	2R:11826580 3R:28038328	0.22	0	-	-	GCGCTCATCGATGCAAATGCAGCTCGGCTCGGAGCTGTGCATCAAGAATCCTGGAGTGAATGGCGTTCGCATTCGATTTTTGTAAATAATTGCTTTACCATAAAAAATACTTTAATTC	-	CG13192, exon	CG34362, intron	CG13192, CG34362
P7	novobreak	TRA	3R	17020960	3L	14366282	3	0	somatic_tumour	2654.7	3R:17020960 3L:14366282	0.14	0	-	-	GCGGGGGAGATCGGTTGGTGGCAAGAGGTGGTGCAACCTAACCGCTCGTAAAATGTTTAAACAAGCGGCGACTTGTAGCCCTCGTAGTTGCTAGCCATTTTTGGGTATACTATGTAGGAGATTATGGACTATAAATCACAAAAACACTGGGCCAATAG	-	AdSL, exon	fz, intron	Pxd, AdSL, fz
P7	novobreak	TRA	2R	12184617	3R	18466808	3	0	somatic_tumour	6282.2	2R:12184617 3R:18466808	0.09	0	-	-	GAACTTAACTTTGGTGCCCTGCTGGCGGAGAATTTCACTCAGTTTAGACCGGAAGACAGTCCAAACATTTGCCTTTTGAGGTTTATGTCTTGCCATGCCTTCTTCTGCTGTCGTTAATGAA	-	CG13175, exon_3	fru, intron	CG33964, CG13175, fru
P7	novobreak	TRA	2R	12256171	3L	5324853	4	0	somatic_tumour	6931.3	2R:12256171 3L:5324853	0.1	0	-	-	ATGTTTACCCAACACGCACACACACACACACACACACATACGTTTTGAACAATATGAGAGGTCGGCAATCTAATTTTGTTGTTTGTCCTGGCGGACAATTCCTTTATGGTGGCCATTGA	-	intergenic	intergenic	-
P7	novobreak	TRA	2R	12473427	2L	903602	3	0	somatic_tumour	11569.8	2R:12473427 2L:903602	0.11	0	-	-	TATGGGACTGGCTGCCCAAATGCGGCTTAAGTTAGTGCCTCCTCTTGCAGTCGAAGTCCTTTGGCCGTCCAGGACATCCGCAGTTGGCACTCCCGGATATCAAAGCCCACAGGTGACTCATTTCCCGCTGCATCGAAGAGTATACCTTCCTGTTCAAAGG	-	CG8550, exon	intergenic	CG8550
P7	novobreak	TRA	X	16818387	2L	20223158	4	0	somatic_tumour	3404.8	X:16818387 2L:20223158	0.24	0	-	-	ATCCCAACTTCCGTCAAAGCAAAGAAGATTTCTTCTTAGTGTCAATCTAATGACAGGGTTTTCCCGCCCATTATCTTTATTGTGGCCACTGGGCCCAGAAG	-	CG4829, intron	intergenic	CG4829
P7	novobreak	BND	2R	13204947	2R	21389437	3	0	somatic_tumour	8184.5	2R:13204947-21389437	0.08	0.01	-	-	GTGCACTTTGCCCCCCCAAAAGCTTTTCATTCTCGCCGATCCATCCACTTTCGCTCAGTAGTCGCGTGGAGCTCACAGTTGTTGATTGGCTGCAGCACCGCAGCTATGCCCGCACTCTGGAGCAACTGGTGGACTTTGTGGTGGGGCAGGCAGAGCGCGACACCCC	-	CG34315, exon_7	Acox57D-d, 5UTR	Orc3, CG34315, Acox57D-d
P7	novobreak	TRA	2R	13835045	3R	11416583	4	0	somatic_tumour	2418.5	2R:13835045 3R:11416583	0.15	0	-	-	ATCCCATCCAGACTTTGTTCGGTTGATGACTCACATACCTCGTAAGTTTGAAAGTCCACTAGATCCTGGCCATGATTAAAGGCCCATCCACTGTCGATGGTTAGTAGAAGGCAGCAATGCCACGAAAATCGTAATGGAGGCACCGAACGTGGTGTACCAC	-	CG6337, exon_1	CG6723, exon_7	CG6337, CG6723
P7	novobreak	BND	2R	13875021	2R	22287377	3	0	somatic_tumour	8412.4	2R:13875021-22287377	0.08	0.01	-	-	GAGATATGCCATAAATTCGAACCGCTTCACTCCTTCCCACAATTTTAATTTAAAAGGTCTCGTGGAACTCCATGGCCTTCTCCATGGCATCGATGAGGTTCTCCTCGCGCTTGGCATACAGCGCCGTGATGT	-	shot, exon_17	intergenic	shot
P7	novobreak	TRA	2R	14601180	X	1991599	3	0	somatic_tumour	12609.6	2R:14601180 X:1991599	0.12	0	-	-	GGTCCGTGAACACGGCGAATTCCAGGTCCGAAGGGAACATGTGCACGTCCATCGCGCGTTTAGACCCCATTTTGCCTTATTTAAGCCACGATTTCTATAAAAACTCGAGAAAAAGATGAGCGCAACAGCCGCACAAGTTGCATTCGCTGCAAGTGTGTGGGTGTACGTGGAGTTGGTGT	-	RpI1, 5UTR	Hr4, intron	RpI1, Hr4
P7	novobreak	TRA	2R	14618994	2L	13475800	4	0	somatic_tumour	1143.2	2R:14618994 2L:13475800	0.2	0	-	-	GGCAATTTAGTGCGGCAACTAATTAAAACACATTTGCCAGCCCGCTCCAGCCAGTTCAACGTCCGTGGGCAGCGGAGGCGATGGCGGTGTCGCCATCGGCGGTGGCCGGCGTTAAAACGACAGTGACCTCGTTGGAGACAGCCACGCCCACGTCTCCGCCGCTGGCCAGCACATCCGCTGCCGCTGCAGCCGCAATGGCGGCCGAGGCGGAGGCAGAG	-	Sec61beta, exon_2	CG42784, exon_4	Sec61beta, CG42784
P7	novobreak	TRA	2R	3091235	3L	7252343	3	0	somatic_tumour	4161.1	2R:3091235 3L:7252343	0.1	0	-	-	ATCTCCTCCAGTGGTCATTTATGCAGACATTGAAGCTGTTCTTGAAAATTACAAAACGTGCTTGAATTCTTCTGCTACTTCGTCAACCACCCAAGTACAAAATCATCTGGCAAGTCGAGCTCATTGTGTGTTTGTTTTGCTTTACTTACCCATTGCAGGCACCT	-	dpr21, intron	CG14830, intron	dpr21, CR43470, CG14830
P7	novobreak	TRA	2R	14716686	3L	21521629	3	0	somatic_tumour	6804.9	2R:14716686 3L:21521629	0.11	0	-	-	CAACTACGTTTACCTCACAATGCATTCTGGGCCACCCACAATCATCAGACTTTTGACTCAATTCCTGCTTGGCATTCTGCAAAAATATAAAGTTATTTCCATGCTTGAGATGTACAC	-	intergenic	Cdk12, exon	Cdk12
P7	novobreak	TRA	X	4028619	3R	5477306	6	0	somatic_tumour	1448.7	X:4028619 3R:5477306	0.24	0	-	-	CGCAACAAGGATAGCCTGCAGGACGCAAAACCATTGAATGTTTTGGTCTACTCAGACAGCGCCAGTGCGCGGGACATTGACCATTTGGATGTGGATATGAATGTGGATGTGAATGTGGATGTGAGTGTGATTGTGGA	-	intergenic	Hcs, exon_4	Hcs
P7	novobreak	TRA	X	4028631	3R	5477306	6	0	somatic_tumour	1448.7	X:4028631 3R:5477306	0.24	0	-	-	CGCAACAAGGATAGCCTGCAGGACGCAAAACCATTGAATGTTTTGGTCTACTCAGACAGCGCCAGTGCGCGGGACATTGACCATTTGGATGTGGATATGAATGTG	-	intergenic	Hcs, exon_4	Hcs
P7	novobreak	TRA	2R	15495428	3R	31973366	10	0	somatic_tumour	16477.9	2R:15495428 3R:31973366	0.28	0	-	-	GACACTCATTGACTTCGGCACCTGTTGTGTTTCCTCTGGGAACTTGCCCGATTTCGGATGCATCAAGATAGAAAAAATCCCAAATACTTGGGACACCCAATGGCAGAAATCCCAATTATTTAGCCAAACATGTGCTAGCTGTAGCAGTGTCGCATCTGTGTGGATTGACTCAAAATTACAAATTGG	-	CG12964, intron	heph, intron	CG12964, heph
P7	novobreak	TRA	2L	12614286	2R	6138632	3	0	somatic_tumour	6475.7	2L:12614286 2R:6138632	0.12	0	-	-	GTAGCAAAGAACTATTGCGATGGAAATTGAAGTTAAGAAGGTTTTCAAGAAATACAGCGAGTAGGGGGTAGGTAGTTAGGCAAATAAAACCGATTATCTGTGGTCCAAAGCACTGAGCTAAAATTGAATAAAAGTTCTTTGGGTGAAGCTGTTTTAA	-	Ref2, intron	EcR, intron	nub, Ref2, EcR
P7	novobreak	TRA	2R	16406408	X	8278871	3	0	somatic_tumour	8127.5	2R:16406408 X:8278871	0.14	0	-	-	TTCCCATTCCAACAAAGCAAACAAAAAATGTGGACAAACTTTGTCGTCCCGCAAAACGAGGGAAAAGCCGAGGAAAATGGGTAAACCAGAAAAAATAAAAGCTTCTTCTATAAAACTCGTGTAGCACTAAAAAATCGTATAAAGGCAACTCCGAGG	-	Sema-2b, intron	nAChRalpha3, 3UTR	Sema-2b, nAChRalpha3
P7	novobreak	TRA	2R	16895804	3L	5409780	5	0	somatic_tumour	11486	2R:16895804 3L:5409780	0.13	0	-	-	GGACAGTAAGGAAATAAAATAGACAGAGTGGCGGGCTAAACACAAAATGTTTCCCTTGCATCGTAGATTTCAAAGTAGCTTGTGGCTTTAGTTAGTTTTGC	-	intergenic	intergenic	-
P7	novobreak	BND	2R	16910917	2R	17596715	2	1	somatic_tumour	685.8	2R:16910917-17596715	0.08	0	-	-	GTCAAAAACGTTGCATTTTCATTTTAGCTCCGCTTATCAGCAACATGAAAGCAGTTTCGGTTAATCCATTGTGCCGGCGTGGTGGCAATTGGTTTGCCAGCTTTGGACGTACCCGAAACTCTGGCACCAAGCTGTTTAATATCTCTGGTCATGTTTGCAACCCTTGTAC	-	intergenic	ND-51L1, exon	Smurf, ND-51L1
P7	novobreak	TRA	2R	16915185	2L	2497249	3	0	somatic_tumour	14417.9	2R:16915185 2L:2497249	0.1	0	-	-	CATCATCATCGTCGTCGTCGTCGTCCGCAATGGCCGCCATCGTTGCGTGATAATGAACGCTTGAAAAACCCAACTTACACAATCCACTACACTACACATCCAGGAAAAAAACGAATGCTGACACTTTTTCCGCTCACTCCGCTAATTCGATGGATTGCCCTGCAGTATTA	-	intergenic	oaf, 3UTR	oaf
P7	novobreak	TRA	2R	17198000	2L	5449461	9	0	somatic_tumour	11748.5	2R:17198000 2L:5449461	0.22	0	-	-	CTGATGGTGATGTTGATGTAAATGTTGTCTCCTGGCCGAAATGGTAGTGAAAGTGTTTGGGGCATTTTCGCTTTCCCTCGTCGCGTGGTGCGTTCATAAATATTCCGTTTTTGCTTTGCTGTTGAACGTTCTGCAATGTGTGTGTGTGTGTGTGTGTG	-	intergenic	intergenic	-
P7	novobreak	TRA	2R	17341008	X	315197	3	0	somatic_tumour	17025.8	2R:17341008 X:315197	0.16	0	-	-	AGCTTAAATTTATTTGACACATGAAAGAAATATAAAAAATTTTGCAGCCCGATAAAAAGGGCAATGTTTTGCGATCTCCGCTTCTTTATTGTATTATGTGTCTGACAACAAGCTTTGAGCTCTGCAC	-	mbl, intron	Or1a, exon_1	mbl, CG3777, Or1a
P7	novobreak	COMPLEX_TRA	2R	17401491	X	12909442	3	0	somatic_tumour	4492	2R:17401491 X:12909442	0.33	0	-	-	GAATAGAGCCAGAGAAACTGGAGTGTTGTTGGCCGGGGGAGTTGGCCATTGGTTGAGTGGATTTTGCGGTTCTCCTTGTTCTCGGCGTATTCCGATTCGGC	-	CG10939, intron	Brms1, 5UTR	CG10939, Brms1
P7	novobreak	BND	2R	17661491	2R	25068965	5	0	somatic_tumour	7407.5	2R:17661491-25068965	0.15	-0.02	-	-	CGCCGAATGCAAACATCCACCGAGCATTTCGAAATATGCATAACTTTTTAGAATTCCATAAGCTGGAAGGGCAAAAAGTCGGTTGGTGAGCCATTTTAAATGCAACCTTTGTGCAATGC	-	CCHa1-R, intron	intergenic	CCHa1-R
P7	novobreak	TRA	2R	18312878	3R	25759290	4	0	somatic_tumour	7446.4	2R:18312878 3R:25759290	0.11	0	-	-	CTATTCAACCAGGGTCACCAGAAATCACCCCACTTAATTTTCCCCTATCGAATGTGCAGACTGCGCTGAATTCGAGACCTGCGATTCCAATAAAAGTCAGCAGGCAGGCAC	-	sbb, intron	LpR1, intron	sbb, LpR1
P7	novobreak	TRA	2R	18338896	3L	20760798	3	0	somatic_tumour	2421.9	2R:18338896 3L:20760798	0.13	0	-	-	CTGTTAATCGTTATTTTGGCACTTTTCCGTCGCTTCTGCTGCGCTGCTGCGGAATTGGTTTTTAAGGCTTAAGTTCTTAAGTCCTCAAAATCACATTTAAGCCTTGATTTATGAG	-	sbb, intron	intergenic	sbb
P7	Control-Freec	DEL	2R	18795550	2R	18811470	-	-	somatic_tumour	15.9	2R:18795550-18811470	0.29	-0.49	-	-	-	-	MFS15, exon_3	CG15096, intron	MFS15, MFS14, CR44468, CG15096
P7	novobreak	BND	2R	18978791	2R	24902529	3	0	somatic_tumour	5923.7	2R:18978791-24902529	0.07	-0.01	-	-	TCAGGTCCAGGCACAGCCACAGGCTCAGGTCCAGCAGGCAGCAGCTCAGCCTGCCCAGCTGCTCCTCCCTCAGCTAACGCAGGCGGGCGTTGTTTGCCAGCAGATGGCCTTTAAAATGCAATGCAATGC	-	CG18605, exon	NaCP60E, intron	CG18605, NaCP60E
P7	novobreak	TRA	2R	19027450	3L	20547762	2	1	somatic_tumour	1520.3	2R:19027450 3L:20547762	0.11	0	-	-	CCGTTAAATGCCGCACTAAGTTTTCCGTTTGAGTGCCAATGAATGGGTAAGCAAATTTGAATGCAGTTCACAGTCTGGGATCGATAACCATTTCGGCTTATGACAC	-	5-HT1B, intron	intergenic	5-HT1B
P7	novobreak	TRA	2R	19101533	2L	1111688	3	0	somatic_tumour	17989.8	2R:19101533 2L:1111688	0.1	0	-	-	GGTAATAGTTACAACGACATTCGCAATGAGGTGTTTGTGACATTTAAAGCTTTTGGGAGCTGAGCCGGCAGTGCCCATGCTGATCCCCGAATCTCCAGAGCG	-	5-HT1A, intron	CG14339, exon_5	5-HT1A, CG14339
P7	novobreak	COMPLEX_TRA	2R	19343637	3L	4112584	3	0	somatic_tumour	15231	2R:19343637 3L:4112584	0.11	0	-	-	TCCAGAGACTGGTTGAAATTCGAGTAGAGTGCCACAGCTGGCACTCGCACCACCACCGATACCTTCACCGACCTGACCAAGGACTACACCTTGGCGGTGTTCTATGAGTG	-	fest, exon_5	Ack, exon	Rgk1, fest, Ack
P7	novobreak	COMPLEX_BND	3L	4112530	3L	11486067	10	3	somatic_tumour	7373.5	3L:4112530-11486067	0.4	0	-	-	CCCACGTACTACAATGAGCAGCCCCAGTTCGACTTTGATCCGGCCAAGATGACAGCTTCACCAGGGCGCCTGCAACCGCCGCCGTACCAGATGCCACCCACTTACTCGAATACAATGGAGTTTGTCCAAAAACGAGACCTTCACCAATTTTTAGTAATCTTCGCTCGCATTTTTTTTTC	-	Ack, exon	intergenic	Ack
P7	novobreak	TRA	2R	19448114	3R	22435077	3	0	somatic_tumour	2987	2R:19448114 3R:22435077	0.1	0	-	-	GCACCATGTTGACGGCCAGCTTGCGGAGATCAGCGTTCAGTTGGCCGGGGAATCGGAGGCAGGTGGTTACGCCGGACATGGTCAGGTGGCAGCAGCCTTCGACTGGACCCGAGCAACCGGATCGACTCCCATTCCCAGACCCGAAAAGCATAAAAAACCAATCCC	-	betaTub56D, exon	CG13847, intron	betaTub56D, CG13847
P7	novobreak	TRA	2R	19602576	3R	30433815	3	0	somatic_tumour	10831.2	2R:19602576 3R:30433815	0.12	0	-	-	CCAATTACTTGAAACTTGAGTGGATTATTTTTCTCAACGTCCTTGCCTCGGGTAAGGGTTAATTCAAATTTCAACAACTTTGACGCATACAAAGCGATTTGTGAGAAAATCCGAGGAAAAGTAAAGAAAACAAAGAGCTGAGCAGCATGCC	-	sm, intron	CG15534, intron	sm, CG15534
P7	novobreak	TANDUP	2R	19682809	2R	22956430	6	0	somatic_tumour	3273.6	2R:19682809-22956430	0.12	0	-	-	GGGTAAGGGGGCGTGGCACGAGGTGGTGCTGCACTGTCAAATGGCATGGTCAAGTAGTTTGGCTAAAAACTGCAAACTGGCGGCGGTCACGAGGCGGCGGCGGAGGAGGTTGTACGATCACCGTGGTCGAGGGTTGGGGTGGCACTTGCACCACCTCCACAACGC	-	CG34198, exon	intergenic	CG34198
P7	novobreak	TRA	2R	19933462	3R	12788104	3	0	somatic_tumour	7145.4	2R:19933462 3R:12788104	0.12	0	-	-	CCTTTTTTGGAGCGGGAAGCACTAGAAAAAAAAACTCTAACCGCTGACCACGCAAAAGCTGCTGCTCGCATTTTGTGCACAAATTGTTTCAAGGCCTTGGCTCCAATTCAATTGCTTAGTGCAATAC	-	intergenic	intergenic	-
P7	novobreak	TRA	X	14405716	3R	7862756	7	0	somatic_tumour	6543	X:14405716 3R:7862756	0.22	0	-	-	CGTACAAACTGGAGGTGTGATAAGATAATCTAAACTAAACTAAACTAGGAACCAATCTGGCAAAAGAAACAAAATTAAGGCAATTGGCGTTAACTTTACCGCTTTGACAGGCGAATATAAGTCGTGAAG	-	dpr8, intron	CG17816, intron	dpr8, CG17816
P7	Control-Freec	DUP	2R	20815400	2R	20849230	-	-	somatic_tumour	33.8	2R:20815400-20849230	0.37	0.62	-	-	-	-	intergenic	CG17999, exon_3	insc, sktl, CR44667, CG17999
P7	lumpy	BND	2R	20958142	2R	22909850	3	0	somatic_tumour	1951.7	2R:20958142-22909850	0.09	-0.01	-	-	-	-	hbn, intron	nahoda, intron	hbn, nahoda
P7	delly	TRA	2R	21310963	2L	14833497	3	0	somatic_tumour	6477.5	2R:21310963 2L:14833497	0.11	0	-	-	CTGTTAATGAGTCCTTTAGGAACCAGGATTGCTTTGAGAATTATTCACGCAATGCACGCGGGTCCTCCGCCTCGTAAATTTTTTAGGCA	-	Panx, exon	intergenic	Panx
P7	novobreak	TRA	2R	21480889	3L	5922584	3	0	somatic_tumour	15558.3	2R:21480889 3L:5922584	0.09	0	-	-	CTCCCAGATAAAGAAAACTACCCCCCCGAGCTCGTCCACGAAAATTGTTTTCAAATAGATAAGAAATCGGCGTTAGTGGGAAAGAGAGGGCGCGAGAGGAGACGGAGAGCGAATACGAATGCGTATGGTGTAG	-	Sdc, intron	CG32407, 5UTR	Sdc, CG32407
P7	novobreak	TRA	2R	21551183	3L	3575318	3	0	somatic_tumour	17975.9	2R:21551183 3L:3575318	0.09	0	-	-	GAGCTGATGTGACACTTCAAATGCTGACAAAATACATCGCATTAACGAAGCTTCCTTCGCAGAATCGGTATTCCTGTGAATACTCACGACCTGCGCACAATTGTTGTTCGAAACAAAATGAACGCGCTTCGAACACGAAAACCCGAAAGCAGAAGATGCTGATC	-	Egfr, intron	Eip63E, intron	Egfr, Eip63E
P7	novobreak	TRA	3L	15071695	2R	18353788	3	0	somatic_tumour	3282.1	3L:15071695 2R:18353788	0.11	0	-	-	ATTTATGGCAGAATTTTTTTTTTTTGAGGCATTTGGCACACGCTGTCACCAAATATCAACTGTATCTGACGGTTTGTTGCCAACTTATACCGGCGCACAGT	-	Plp, intron	sbb, intron	Plp, sbb
P7	novobreak	TRA	2R	21737255	3R	21535033	3	0	somatic_tumour	202.2	2R:21737255 3R:21535033	0.15	0	-	-	CGACTGCGAGGCTGGGATTCTGTGGCCTCTGCGTTGTCGAACCTTTTTGTGCCGAGTGGCAGGCACTTTCGCTGATTGCTGCTCCCGAGATCCATTCAACCCCCAATCCAATCGTTTCGCGCCCCCCTCATT	-	intergenic	CR44033, ncRNA	CR44033
P7	novobreak	TRA	2R	21825423	3R	5772570	3	0	somatic_tumour	16052.9	2R:21825423 3R:5772570	0.12	0	-	-	AGAAAATATAAATATTTCTCATTCTCATTTGTTTACGTCAAGCAATCCCAAATATTTCAATTACCTCTAAAGAACGTAATTTGGGCTGCGCCAGTGAGTTTGAAGTGCAGGTTATCAAGGAGCTGGTGGCCCAGCAACGTTTGCTTCTGTGTTCCGGACAAAAGTGTAACGAATAC	-	CG13492, exon_4	CG2082, intron	CG13492, CG2082
P7	novobreak	TRA	2R	22279289	3L	2031385	3	0	somatic_tumour	20247.9	2R:22279289 3L:2031385	0.09	0	-	-	CACCGGAGGACAGGTAACAGCTGGATGTGCCAGCGAATAACCACACACTAAACGCAACTGCCACCCAAGCGCCACACAAGCCCACACACACACACACACACACAC	-	dve, intron	intergenic	dve
P7	novobreak	TRA	2R	22356658	X	9763388	3	0	somatic_tumour	12593.3	2R:22356658 X:9763388	0.1	0	-	-	AAAGGTTAAACAAACTTGGTCTCATGTTGCAGCAACACTTTTCCAACCTGCCGCCTGCAGAGCTGCGGAAAATCAACTACGACGACCTCAACCTTAAGAATTGAGCCAGATGCAGTGAGAGAAGAATCTAAGATTGCATTAGGAGCAACTAAATTTCTACTGGCGGGAATG	-	Liprin-gamma, intron	intergenic	Liprin-gamma
P7	novobreak	TRA	2R	22531231	3L	3143309	3	0	somatic_tumour	19387.9	2R:22531231 3L:3143309	0.1	0	-	-	CTTTAAAACTAACCGCTTACAAAGCCAATTAAAATGGTTTCAGTTATTGTGGCTGGAGCTGGATCACCGGGATCTCTGGGCGGTTTCTGGCAGGGATTTGACTCAGCGGAGCTATTTTCACGAAAATTTAATGCGTTCGTTGCAAACACGGGCCGAGAAC	-	px, intron	CG11537, 5UTR	px, CG11537
P7	novobreak	COMPLEX_BND	2R	22870861	2R	24111678	11	0	somatic_tumour	1240.8	2R:22870861-24111678	0.42	-0.06	-	-	CTGCTGGCTCTCAAGCTGGTGAAGACGCGCTAGGATGTGTTGATGTAAATGTGCCCACTCTTTTCCTTGTAATAATATCCTTAAGGGATCACTCTTTTCGACGTTTTGTTACCTTTTGTTTGCAATAAA	-	intergenic	CG4049, exon_2	CG4049
P7	novobreak	TRA	X	17639989	3R	21797560	4	0	somatic_tumour	4157.6	X:17639989 3R:21797560	0.16	0	-	-	GTCTACAATTGTTTACGATTTGCATTTTGCATTTTTCCCTGCTGTCACAGTGAATTTCGAAAATAAAGCTATCCAATCAGCAAGATAATTGCTCTTTGCTAATAAATACAAAAAAAAAAAATCACCCAACTA	-	RhoGAPp190, 3UTR	CASK, intron	RhoGAPp190, CASK
P7	novobreak	TRA	2R	24085160	3R	9059241	3	0	somatic_tumour	15025.9	2R:24085160 3R:9059241	0.11	0	-	-	GTTACGACCTTGAAGCCCATCTATCTGGGCGAGGAGACCGAGACCCCCAGCCTGGAGACCATAACGGTAAGATGGGTATGCGGACGGGCAGCCATTTCATCCT	-	CG16786, exon	Kdm2, exon_4	CG16786, Kdm2
P7	novobreak	TRA	2R	24538219	X	15108997	4	0	somatic_tumour	9429.2	2R:24538219 X:15108997	0.12	0	-	-	TTTAGATAGACGCGCCGCAACATAAATAGCAATTCCAAACAATTTTCAATTGCCAAACGCCCGAGTCGCGGAGCATCTTGGGGCAAGTCCGAGATCTGAGATCCAAGATCCGAATCTCGATCCCAGCTTGTGCCTGGCATTTCCTTACAATGTGTGCCCAACTGCCGACCCGTGTTTCCATTTCTATCATTTGCGTGTGCGCCGCTCATTTAGATCTGAAAGCGGCAATTAGCCCGCTCGACTGCTAAGCTGCAGTTAAATTGACCGACCGGTCAACGGAGGGACTCAGACCGATTGTTAGTTAGAGTCAGAAAGAGAATGC	-	ITP, intron	Rab3-GEF, intron	CG4622, ITP, Rab3-GEF
P7	novobreak	TRA	3L	310817	X	8322823	3	0	somatic_tumour	8012	3L:310817 X:8322823	0.09	0	-	-	ACACACACACATACTGGTGTGGATGGCAGATGGGTGAATGGGGTTTATGGGTAGCCTTTGTCGGAGAACATTGAAACCCTGCCTTTGTCATAGTTTAAATCGGCATGCTGTTATTGACTGGATTCGATAACTTGAAACACTCACAAATATTTAGCACTAGTGTATGTA	-	fwd, intron	nAChRalpha3, intron	fwd, nAChRalpha3
P7	novobreak	BND	3L	490197	3L	13551469	3	0	somatic_tumour	13061.3	3L:490197-13551469	0.07	-0.01	-	-	GTAGTTGGCTTTGTCGTCTGTGTTTATGCAAAAAATTTGTCTACAGTCTACAGCCGTCGAGCCATTCCCCAGCTAAACTTCGCCGAACTCAAAAGTGTACGAAAAACATAGCGAAAAGAGGAAAGGAAAGAGGATTCGCCGACATATGGACGATAATAATAT	-	klar, exon_1	CR45825, ncRNA	klar, bru3, CR45825
P7	novobreak	TRA	3L	505947	3R	11847116	3	0	somatic_tumour	11341.2	3L:505947 3R:11847116	0.09	0	-	-	TGAGAAATGCATGTCAGACTCACACAAAGTCTCCATGGAGCGCGGGCGGTACAAGTGGGTGTTGGGGATGTTGAGGATGTCGGCGAACTCTCCAATTTATTCTCCATTTCGCGCAGCCAACGCCGCAACTCCTTGGGAT	-	klar, exon_5	CG6959, intron	klar, CG6959
P7	novobreak	BND	3L	915334	3L	9505222	2	1	somatic_tumour	8589.9	3L:915334-9505222	0.12	-0.02	-	-	GCACTCTCCGTGCATTTTCCATTTAATTTATTTTTTATTGCTCCGGCCCGCCTTTGTTCTTCGCCTAAAAGGCGATTGACCGGGAGGAGTGTTTGATTTGCGCGGCAT	-	Glut1, intron	path, exon_1	Glut1, path
P7	novobreak	TRA	3L	984766	3R	9243881	3	0	somatic_tumour	8259.1	3L:984766 3R:9243881	0.12	0	-	-	GCCTCGTAACGTGGAGTGGGCATATCGTTAGGAGCATTTCGTTGCGTTTCGCTCTCCAAAGTTCCACCTTAAATTTGTAGCTCGTATTGCTGTACTTTATTTAGCCAC	-	Glut1, intron	Vps15, exon_4	Glut1, Vps15
P7	novobreak	TRA	2R	18535166	3R	11836872	3	0	somatic_tumour	6698.3	2R:18535166 3R:11836872	0.11	0	-	-	GATCTATATTTAGACGAACTCAGAGGCTCGTCCACTGATAACCCGCCCGGCTCCCTCCTCCCCATTGCCACGGGGCGAAACTGAATCGCGAGGAGTATTTAAAGCTGGGGCAAATG	-	CG10924, 3UTR	CG6959, intron	CG10924, CG6959
P7	novobreak	TRA	3R	5735366	3L	1274081	3	0	somatic_tumour	4461.3	3R:5735366 3L:1274081	0.12	0	-	-	GATGTGGCTTTTCAAATTGATCTAGCGCTTTGCAAAGCCGGTCGAACTCATCCAGATATGGCTCTTTAGGCAGCCCAATGTACGAGAACGGCGAGGAGGAGAACTGCCTAGAGCTGTGGAACCGCGATGGCAAGGGCCTCAAGTGGAACGACTCGCCGTGCAGCTTCGAGA	-	CG2100, exon_1	tfc, exon	CG2100, tfc
P7	novobreak	TRA	3L	1315347	3R	9093169	3	0	somatic_tumour	7777.8	3L:1315347 3R:9093169	0.08	0	-	-	GACAGTATCAGCATATGCACAAAGAGATATGGCGTTGAGTGCTGCAACATTTCCACAAATTGTTGCTGGCGCTTGTTCCATCGCGCGGCAGGGTTTATGCCTTCGG	-	Sherpa, exon_5	pum, intron	Sherpa, pum
P7	novobreak	TRA	3L	1338603	2R	13081057	8	0	somatic_tumour	11742.5	3L:1338603 2R:13081057	0.25	0	-	-	GGGACAGGTCCTGTCCAACTGACAGATGGCCTGGCCGGACCGAAACTTCTAGCTGAGATGGGCGATTCCCCGCCACTTCCACTCTTGGCGCTGAAGGAATC	-	l(3)02640, exon	intergenic	l(3)02640
P7	novobreak	BND	3L	1502986	3L	19842591	3	0	somatic_tumour	18339.6	3L:1502986-19842591	0.09	0.01	-	-	ACCGCAACCTGAAGTATCACACGCACAGTCTGGTCAAGCCCAGTAGTTATTACTATGAACCGTTGCCACTGCCACCTGAAGACATTGAGCCTGTTCCCTTACGTGCAGTTTGACATTAGTCACTCGAGAACGTAATCTTTCCAAAATGTATGTTAAGA	-	Psa, intron	kto, exon_5	Psa, kto
P7	novobreak	TRA	2R	23489427	3R	15640672	3	0	somatic_tumour	7848.8	2R:23489427 3R:15640672	0.11	0	-	-	TTCGCACTCCCCAAACCCCCGAAAAGCGACCCCACATTCGACTTTTATGGGCAGTTTTCTTTTGAAAAGAAATTAAAATTATATAACCGCATATACCAAATATATAAATATACATTAT	-	CG43795, intron	intergenic	CG43795
P7	novobreak	TRA	3L	1725880	3R	21175577	4	0	somatic_tumour	19449.7	3L:1725880 3R:21175577	0.12	0	-	-	GGTTCTGCCCCATGAGCGGCGGAAATGTTTTCGTTTTGATTTGTTCGCATTCATATTTATCGAGCAGAATAAATGGCAAAAATAATACAGTCCATCCCGCCAGCTCACCAACTCGGGATCCGTCTCCGTTTCCGTGTCCGATGATGTAAGTGAAGGGTTCAAAAACAAAGTCTATATGGG	-	drpr, intron	SNF4Agamma, exon_3	drpr, SNF4Agamma
P7	novobreak	BND	3L	2129933	3L	7111671	3	0	somatic_tumour	4981.7	3L:2129933-7111671	0.07	-0.01	-	-	AGCCTTTGTGTGTCATTGCAACAGATTTGTAGCTGAATAATTTACTCGAACAGCCGTCCAATAATCGGCCATAATGAATAATTCGTTGATGACAATCTTGAAGCGGTATCGCTGCTTCTTGAGATTCTGCAAGGATATTAT	-	zormin, intron	form3, exon_3	zormin, form3
P7	novobreak	TRA	3L	2151314	3R	30102468	3	0	somatic_tumour	27951.2	3L:2151314 3R:30102468	0.11	0	-	-	CAAACAAAATGTTTACCAAATAGAAAACGACACAGAATGCACAATATACAATCTCCCATATCTATAGGTTGTGACTGTTATTGTCCACTCAATGCCTTCCGGCATAATATTGGTTGGGTGGGTGTGTTCTCTGGGCGTATGTCACCC	-	zormin, intron	sima, intron	zormin, sima
P7	novobreak	BND	3L	2233996	3L	12006234	2	1	somatic_tumour	9772.2	3L:2233996-12006234	0.07	0	-	-	CCACCATACTGGACAGGAATGGCACTGAGATCAGACAGAACTTTGAACAGATGGTATGTGGGCACAAGTAGACTAATTAGCTTTTTTTTGTCACCCTCCAAAAACTGATTGCAAATCTCAGCGGCTCGTAGCAGAGCTCTTTCCAAC	-	Oseg2, exon	CG6928, intron	Oseg2, CG6928
P7	novobreak	TRA	3L	2342967	X	13887823	3	0	somatic_tumour	11544.9	3L:2342967 X:13887823	0.13	0	-	-	ATACCATACACGACTACATCCTGACGGACAGTTTGCCGCGGGAGGAGAAGCTCAGCTACAGCTGGGCCTGCTTCATCAAGTTCCATTCGATTTTCGCCCAGGTTCTGCACACCATTTCCATTTGGCTGACGGTGACGCTGGCTGTTTGGCAACTAGCGAAGAGCCAACGCAGCGCAAAAAG	-	MsR1, exon_4	mamo, intron	MsR1, mamo
P7	novobreak	TRA	3L	12723299	3R	4776362	4	0	somatic_tumour	7946.9	3L:12723299 3R:4776362	0.11	0	-	-	CAAGAGCGAAATTACCAAGCACTATTCCAAGCCCAATGTGGTTGCCATAAAGGCCATAAAGCCAATGGCTCAAGTTCCGGTTATTTATGCTGGCCAATATGTCACTCCAAATCCTCTTTGACCG	-	intergenic	atms, exon_2	atms
P7	novobreak	TRA	2R	16055147	2L	3126157	3	0	somatic_tumour	12929	2R:16055147 2L:3126157	0.07	0	-	-	GTATGTGTCCATAATGCTCAACGCTCACTGCTCCTCAGCTTGCGCAATGCCCCCCAGTCGGCCACCACAACGCCGCATGGAATGAGGATGATGGGACAGGC	-	CG8405, intron	toc, exon_2	CG8405, toc
P7	novobreak	TRA	3L	2837594	2R	16051228	3	0	somatic_tumour	13213.6	3L:2837594 2R:16051228	0.15	0	-	-	TGCAAAACTTTTGAATGAAAAAATATCCAATTGCATCGTACCGAGCGAATCCTTTTCTGTGCAATTGAAAATAATAAAAATAAAAAGGGGCACACACGAAA	-	Tet, intron	CG8405, intron	Tet, CG8405
P7	novobreak	TRA	3L	3024502	3R	12038287	2	1	somatic_tumour	9013.8	3L:3024502 3R:12038287	0.1	0	-	-	CCCCCAACTACCCCTTCGCGTAAGTACCAAAAGAGCTCTACAAGGTAGCAGCCACAAGAAACTTCGTTAAGCTCCTCTGCCGGCAAACACGAAAACACTCGCCACTCCAAAACAAATTGAGATAGCTCTCAGCCAG	-	aly, 3UTR	intergenic	aly
P7	novobreak	BND	3L	3566902	3L	12369895	2	1	somatic_tumour	8803	3L:3566902-12369895	0.1	0.01	-	-	CTTTGAGCTCAAACGAAGCAGCAGCCAACTCCATTAGCGGCATGGGGCCCGTTAGCTAGCATTTCGCGGTAATTCGCCATATACCTACCTCAATTTGCAGGATTGCCAGGTGCGCCGCGTACTGATGATGTAGGGC	-	Eip63E, intron	Ncc69, intron	Eip63E, Ncc69
P7	novobreak	COMPLEX_TRA	3L	4001017	3R	9722179	3	0	somatic_tumour	5721.2	3L:4001017 3R:9722179	0.09	0	-	-	GTCTAACTGTGTGCTCAGTGCACTGCGAGAAATAATGGGACATCTTCGCGTCTCAGCAGCCGACACTGCTGCCAGTCGTCCTCCTTGCCCTCTTCCTTGGATGTGGAGGCTGTGTTAGAT	-	intergenic	hyd, exon_7	hyd
P7	delly	COMPLEX_DEL	3R	5628549	3R	6360142	7	0	somatic_tumour	731.6	3R:5628549-6360142	0.2	-0.04	-	-	GAGATCTTGAAACGGCGGGAACGCTGTTACTAACCCTATGACTTGGAGTATTATCGCTGATTTTAGTAAAAGTTTCATTTAGTTCATAAACTGCTTTATTT	-	CG31551, exon	Pak, 3UTR	CG31551, Pak
P7	novobreak	COMPLEX_DEL	3R	5628549	3R	6360142	7	0	somatic_tumour	731.6	3R:5628549-6360142	0.2	-0.04	-	-	GAGCAAAAACAGCGCGAGATCTTGAAACGGCGGGAACGCTGTTACTAACCCTATGACTTGGAGTATTATCGCTGATTTTAGTAAAAGTTTCATTTAGTTCATAAACTGCTTTATTT	-	CG31551, exon	Pak, 3UTR	CG31551, Pak
P7	novobreak	COMPLEX_TRA	3R	9717018	2L	4966755	5	0	somatic_tumour	4750.3	3R:9717018 2L:4966755	0.17	0	-	-	ATGGAACACGGCTCTGTGCTGCCGGAACTGCGAGAGTTTACTGGACGCTCCGTTTTGTAGGTCTTGAGGCACATCAGGGACTCCGAATCGAACAATTTGGCGGTGGTGTCCTTGGAGGCGGTCACAAACAT	-	hyd, exon_13	Trip1, exon	hyd, Trip1
P7	novobreak	TRA	3L	4501770	3R	30846576	5	0	somatic_tumour	26344.8	3L:4501770 3R:30846576	0.17	0	-	-	ATATTTCATAAAAATAAATTTATAAAATAAATAAATAAATAAACATAGTTGGTTAAACATTAGAGTGGGTTTTGGGATAAATGGGGTTGAGATTAGGAGCCAGGTAGACAAACTACAAGATTAGGCTCCTGGCGAGAACGGCAGAGACTACGAGCTAAGGCATCGGCGTTAATACGTTAGATTTCGGGGATTTGAGCCTTCGCTGACAACTCACCCGCTTCTCTGGTAGTCCATTGTGGACCTGTC	-	NT1, 3UTR	intergenic	NT1
P7	novobreak	TRA	3L	5226964	2L	4992332	3	0	somatic_tumour	234.6	3L:5226964 2L:4992332	0.08	0	-	-	GCACAAGGGCAAAGTAAACAAATGGTTTCCGCTTAATGTAAACAAATCGATGATGGCAAACAATTGATGGAAAAAATCCAGAAGACACCGCGATCATCTTTTTGCTCCACCTACTTACTAATCAAAAC	-	shep, intron	CG34126, 3UTR	shep, CG34126
P7	novobreak	BND	3L	5265242	3L	14994585	2	1	somatic_tumour	9729.3	3L:5265242-14994585	0.08	0.01	-	-	GTCTAAGTGCTCTCTAAATATGCTGTAATGCTGCTTTAAATGCCTATTAAATGAGGAACTAAAATATTTTCCAGGGTGTTTTGTTGCAAGTCTTTGGAGCTAAACG	-	shep, intron	Zip71B, exon_2	shep, Zip71B
P7	novobreak	BND	3L	5652412	3L	22008889	3	0	somatic_tumour	16356.5	3L:5652412-22008889	0.09	0.01	-	-	ACGCACACAATTTGCATGTCCAGGGGGGTTAACATGTGAGCGCAAGCATTGAAGTGGCACTGCCCCTTCCTGCCGCCCCCCACCGAGGTGTTGTTCTCCTCCTCACTCAGAATGAGAATCCTGTGAG	-	intergenic	intergenic	-
P7	novobreak	TRA	3L	5919793	X	19548572	3	0	somatic_tumour	13628.8	3L:5919793 X:19548572	0.11	0	-	-	ATACACATATGTATGTGTTTGAGCAACTAAGTGTTCTCTGTGGGCGAATATACGTGGGCAAGTACTTTTCCAAAGTCAAACACGCACACATTGATGGCTGCCTTTTTGCTGAATCCCACGAAGACGTTCCATCATGAGG	-	CG10483, exon_2	intergenic	CG10483
P7	novobreak	TRA	3L	5938755	3R	4100848	3	0	somatic_tumour	1837.9	3L:5938755 3R:4100848	0.11	0	-	-	ATGCTCAATAGTCGGACGGACTAGCGAAATGAATTGGGTTTTGGTCATGTAAGGATCCTTTAACAAAGAAGCACTTTTAAACAATGAACAATGGAGGCTTGTGCCACAAAAGAAC	-	CG33993, intron	CG42402, intron	CG33993, CG42402
P7	novobreak	BND	3L	6841542	3L	9313364	2	2	somatic_tumour	2471.8	3L:6841542-9313364	0.09	-0.01	-	-	TTGCTAATTTTTAATTTATGCAAAACGCATTTTCCTACCTCTTGCCAAATCCTTTATCGCGATTATTGCGTAATTCGAGACACACAAACTAAAACGGAAAATAGACTCACTCGCAAACGCACACACACACATATGTAGGTATATATGCAGCGGGCGCAGTGCTCATT	-	intergenic	intergenic	-
P7	novobreak	TRA	3L	7032044	2L	15094	11	0	somatic_tumour	7016.9	3L:7032044 2L:15094	0.31	0	-	-	TACATAGCCCCTGGACATGGACAGAGCGTTGGTCTTTAAATTGGGTAACTTTACAAACCCAGAAATGTGATACAGAAAGCACATTCTCGTTTCCTTTGTTTGGCCACTGCACAATGGCAGAGCTGTCAATTTACTTAGCCCCAAAAATGCAGGTAATAATGAGAGTCAAGC	-	Mp, intron	l(2)gl, exon_3	Mp, l(2)gl
P7	novobreak	TRA	3L	7549091	3R	8122293	4	0	somatic_tumour	573.2	3L:7549091 3R:8122293	0.17	0	-	-	TTTTTATGGCCCCCAACTTGTTGCACTTTCGTTGTTTATTCACCAGACATTTAATCAGGTGCGGCCCACTGCACATCATTTCGTTAAATGTTGTTAAAGTGTGACTGAGAAGCTGAGCGCTGTTACTATTATAATTTCCTTTTACTTAGCATTCGCGTTACACTGCTCAGGTG	-	intergenic	puc, 3UTR	puc
P7	novobreak	TRA	3L	7980692	3R	4445690	3	0	somatic_tumour	3535	3L:7980692 3R:4445690	0.09	0	-	-	AGCACTTAGATGGTATCAACTTAGGCTTAAACGCGATAATTCTATTAATAGAAGCAAATTATCCACCACCACCACCACCAGTAAAAGCCACAGCCTAGCAGGACCACAACCACTGAGCTCCATCGCCAACAAATACCA	-	nmo, 5UTR	CG31522, intron	nmo, CG31522
P7	novobreak	BND	3L	8066967	3L	15812621	2	1	somatic_tumour	7745.7	3L:8066967-15812621	0.07	0.02	-	-	TTGTAGTGATTTTCCTTTTCACTTAGTTGCATTTATCCTCGGAACGAACACTAAAAACTAGGCGCCGTAAAATATTCCGTCTATTCTTCGCTAGCGAATGTATCTTTCCGAGGCAGTGTCAAAATCTAATTGGAATTTTTCCCAATATGAAC	-	Ect4, intron	fwe, exon_5	Ect4, fwe
P7	novobreak	TRA	3L	8638919	3R	29319538	3	0	somatic_tumour	20680.6	3L:8638919 3R:29319538	0.1	0	-	-	CACTTGTGCGCGCTGTGCTTTTCAACAGTTTTCCCCCACTGCGGTCTGTTGCGGAATAACAAGAATCGAGATCTGGCACGACGAACTATTATGTAATTTAAAGGCATTTGCACCTGAAATTTACGCTTAAAGTGCAATATATTTTGA	-	intergenic	Cnx99A, 5UTR	Cnx99A
P7	novobreak	TRA	3L	8693576	3R	8439419	3	0	somatic_tumour	254.2	3L:8693576 3R:8439419	0.1	0	-	-	AACCGGTGGAAAGTTTTGATTTATTTTGACCCTAGCTGCCCCAATTGAATTTACCAGTCTGTGCCATCCGTCGTCGCTTGTCTGGCCGTTTGGCATTAAAA	-	intergenic	CG45263, intron	CG45263
P7	novobreak	TRA	3L	9731434	2L	2653329	3	0	somatic_tumour	7078.1	3L:9731434 2L:2653329	0.1	0	-	-	GATTAAATGGTAGCAATCAGTCTTGAGCTGCACTGGCATCGTCGTCGACCGCTGGGGACGGTGGAGACTGCCTGAAGTTCTCGGATTTCATCCTCCGGAACATGGATC	-	CG6749, exon	Prosbeta4R1, exon	CG6749, Prosbeta4R1
P7	novobreak	TRA	3L	9844027	3R	11670459	3	0	somatic_tumour	1826.4	3L:9844027 3R:11670459	0.07	0	-	-	GACGGAGGTGGCCCAGCCGCTGGTGCGACTCTTTACGCACACGGAGCAGCACCACCATGCTGCCGGAGACGACAACCGCGTCCACACAGTCACCAAGCGAAATGCCACCCACATTTATGGCTCCATATCCCAACGAAC	-	RasGAP1, exon_2	CG42327, exon_2	RasGAP1, CG42327
P7	novobreak	TRA	3L	9869262	3R	26400299	3	0	somatic_tumour	16531	3L:9869262 3R:26400299	0.1	0	-	-	GACAGATGATACGCCCAGTCACTGGCAACAATGTCCTGGCCAAGTTTTTCTGGCCTTCAAGAATGCCATGCTCTACGAGAACCACCGCTGCTCCCTGGATCCTGTC	-	CG8108, exon_6	intergenic	CG8108
P7	novobreak	COMPLEX_TRA	2R	20932052	3R	12891609	6	0	somatic_tumour	8040.4	2R:20932052 3R:12891609	0.18	0	-	-	GATATGCATGTTGTGGGCCACCGTCGTCTGTCTGTCGGGCTGAAAATTATGACAGGCCATTGAAAGAATTGAATCGGACGGACGGCTGAATGCTTCGTGTCTGTCGCTGTCTGGAACTGGGACAGCCCTATAATTAGGCTCCCCCTGGCAGGATTCGAGGATTTTTTAATTGAATTAAAG	-	Rx, intron	intergenic	Rx
P7	novobreak	COMPLEX_TRA	3L	10282443	3R	29457244	3	0	somatic_tumour	19174.8	3L:10282443 3R:29457244	0.11	0	-	-	GCACGCACGCGGTCTCATTATTGGGTCAACAAACTGGCTCGATGATGGATCGCTGAGCGATAAGCAAATATTCTGCAATTATGCACATTTTATTGGAAATTGTTAGTTGGCAAAGGCGCAGCGAATTCAAATTG	-	intergenic	Ptp99A, intron	Ptp99A
P7	novobreak	COMPLEX_TRA	3L	10339599	3R	7823747	3	0	somatic_tumour	2515.9	3L:10339599 3R:7823747	0.1	0	-	-	ACATAGAGCATGATGTCCTGCGGCCGTGTGCAAATGTTTATTTTTTTTTTTTGTTTCTCCTCCTCTGATTTTAATTGAAACATTTTTGACCATATTTTCTTAATGATCTGACATGACA	-	CR46006, ncRNA	CG34384, intron	CR46006, CG34384
P7	novobreak	COMPLEX_TRA	3L	10339610	3R	7823747	3	0	somatic_tumour	2515.9	3L:10339610 3R:7823747	0.09	0	-	-	ACATAGAGCATGATGTCCTGCGGCCGTGTGCAAATGTTTATTTTTTTTTTTTTGTTTCTCCTCCTCTGATTTTAATTGAAACATTTTTGACCATATTTTCTTAATGATCTGACATGACA	-	CR46006, ncRNA	CG34384, intron	CR46006, CG34384
P7	novobreak	COMPLEX_TRA	3R	29457244	3L	10282443	3	0	somatic_tumour	19174.8	3R:29457244 3L:10282443	0.11	0	-	-	GCACGCACGCGGTCTCATTATTGGGTCAACAAACTGGCTCGATGATGGGTCGCTGAGCGATAAGCAAATATTCTGCAATTATGCACATTTTATTGGAAATTGTTAGTTGGCAAAGGCGCAGCGAATTCAAATTG	-	Ptp99A, intron	intergenic	Ptp99A
P7	novobreak	TRA	3L	10453260	X	16685026	4	0	somatic_tumour	6231.8	3L:10453260 X:16685026	0.15	0	-	-	ACCCAACATTTTGCAATTGACCATTTTCCGTGGCTTTCTGGGGTTCGGTTTCTTATAAACAAAGTCGATTTGGTTGCAGCTGCTCCAGGATTTCTCTGGGTCACCATATAAGTCCTATATAGTAG	-	intergenic	Sep4, 3UTR	2004-09-01
P7	novobreak	TRA	3L	10549890	2L	19574969	3	0	somatic_tumour	9025.1	3L:10549890 2L:19574969	0.11	0	-	-	GGTTGAAACGATGACGATGAAAGGTCACGACGAAGAATTTTTCGCCAATTGCCTGGTGGGTCGCACAGTCTGGGTCGCGAGACGTCTGACTAGGCTAAAATTGATTGCAGGTTTTTTTTTTTTGGTGATAACAACTATTG	-	Rbfox1, intron	spi, intron	Rbfox1, spi
P7	novobreak	TRA	3L	11163228	3R	9917754	4	0	somatic_tumour	1245.5	3L:11163228 3R:9917754	0.15	0	-	-	GTGTTTGCCAACGACAAGCCACGATGGCAATGGAAAAATGTCAATCCATTTCTGTACATGCCAGATATGCAGGTGCAAAATGATGCAATTCGACTGTTGCAAAACGAATGTCACTGATAGTTACTGAAT	-	CG32082, 3UTR	Glut4EF, intron	CG32082, Glut4EF
P7	novobreak	TRA	3L	11213687	X	15951538	3	0	somatic_tumour	4737.9	3L:11213687 X:15951538	0.18	0	-	-	TGCCTGCGGCAGCCAGCCAGGCACAAGTTCTCTTTCTGGATTTCGTGCAGCAGTGCTTGTACTTCGAGGACGATCCGGCCGTCCATGCGATCATCCTCGATGGCAGCGGCGGCGGACTCGGCGGCA	-	CG7600, exon	mmd, exon_22	CG7600, mmd
P7	novobreak	COMPLEX_TRA	3L	11403831	X	11299479	3	0	somatic_tumour	104.4	3L:11403831 X:11299479	0.12	0	-	-	TTTGTACTTATTGCTCATCATTCTTTTGCCATAGGAACAGTGATTACCAGGTATCTACCAGTCGTGTTCTTCGATTAGAGGGTTCTTCCTTGTTTGGTTTGGGCGATTGGCTGCTCCTCCGATCTTGGTGTCGTTGGTCG	-	intergenic	CG44422, intron	CG44422
P7	novobreak	TRA	3L	11259935	3R	26733727	3	0	somatic_tumour	15473.8	3L:11259935 3R:26733727	0.09	0	-	-	GAAAAGATTTGGGAAAATCGGAAAAACTCTAGGGAAAATGTGCTCGAGGGCAAAATCCTCAATTGTCATGTTTCTTGACAATTTGTCTAATACGCAATGCGCTCGTAGTTTCTTTACGAC	-	intergenic	intergenic	-
P7	novobreak	TRA	3L	11758142	3R	17776760	3	0	somatic_tumour	6018.6	3L:11758142 3R:17776760	0.1	0	-	-	TTTTGTATATCCCCAAGCTAGAGTTTGTTGAATGTGCAGACAAGCAAATGCTAGTTAGCATCGACACTTGTCGCATGCAAATCAGGGGGAAAACCCATATCAGCCGCTCTCTGAGCGCGAC	-	CG6024, intron	CG43102, intron	CG6024, CG43102
P7	novobreak	TRA	3L	11762048	3R	17762643	3	0	somatic_tumour	6000.6	3L:11762048 3R:17762643	0.09	0	-	-	GTGCGGGGATAGTCAGCCAAGCGACAAACATGGCCAACAGTTCCAGGAGGAACAATAACAGTAACAACAGCTTAAACTATGACCAAAATGGCCAACACGACGTAACTGTGAAGAAAAATTAGGCGACATACAATTAATGGCCCTGTGCCAGTGGCTTCGTCTTGTATTTAAAGAACTTGGCAAACACATCAAG	-	CG6024, intron	TyrR, exon_1	CG6024, TyrR
P7	novobreak	TRA	3L	11917317	2L	15964921	3	0	somatic_tumour	4047.6	3L:11917317 2L:15964921	0.1	0	-	-	GGTACACAGATTATTTTGCCTGGACTTCTGGACTCCAGATGGGAAAACTTACGTTTTATTTTCCGTATTCTATGCTTTTTTTCTACTACTTTTTTGTACTTTTTTCTTTTGTCC	-	CG44837, intron	intergenic	CG44837
P7	novobreak	TRA	3L	13116480	2R	15685883	3	0	somatic_tumour	2569.4	3L:13116480 2R:15685883	0.16	0	-	-	GTTCCCGTGGAAGGATCTTCAGACTCTGGACCTTTCCGAAAATCCCTTGTCCTGCGACTGCCGTGTGATGTGGCTGCACATTGATCACAAAAAGTTTGTACCTTCGGAAATTTGTGATTTACGAATTGTATTTTTAACAATGATTTTCC	-	trn, exon	CG30082, exon_1	trn, Ranbp11, CG30082
P7	novobreak	TRA	3L	13665166	3R	3520032	3	0	somatic_tumour	10145.1	3L:13665166 3R:3520032	0.09	0	-	-	ATTACTAAGCTTCTCTCTTTAGAGCTTGTGATGCGTACTCGGCCTTAAAACTCTTTATTTTGTTTGGTGTAAACTATTTCAAAGGATTTCAAATTAGTTTAAAGTTCAAAGAAAAATTTGACAAACGTTTGCACAGTGCACAAATTGAATTATCAAACACTTCACAAATTACGAATC	-	bru3, intron	Parp, intron	bru3, Parp
P7	novobreak	TRA	3R	15663172	4	397823	3	0	somatic_tumour	15265.3	3R:15663172 4:397823	0.11	0	-	-	TGGCATAGTCTAACTTAGCAGTACTAAGTTATCTTAATAAAAGTAGCGGTCTCGAGCCCGATTCCCCGCCCCTGAAAAGAGTTCCTGTTAATGATTGTATGAGATTGA	-	intergenic	intergenic	-
P7	novobreak	TRA	3L	14918762	2R	21756112	3	0	somatic_tumour	6837.3	3L:14918762 2R:21756112	0.1	0	-	-	AGGGCTATAAATATTTGCAATGTAAAATGCTGACTCGACCTAAACGAATGAGATGGGCTGAATGCGTAAGAAGGAGTCGGAAAAGGACGAAGGACGAAGGATTAGTACTTAATTTGATTAGGCCATTCAAGTTGGCAG	-	DCX-EMAP, intron	intergenic	DCX-EMAP
P7	novobreak	TRA	3L	15328350	2L	21172823	4	0	somatic_tumour	5844.5	3L:15328350 2L:21172823	0.27	0	-	-	GAAGCAATCGAATTATGGTATTGTTATTCAATTCTTTTCAAATTGTTTATATTATATTTTGACTATATCGAGTGTGCAGCTTTAAAAGTATATTTTTCTATTTTATATTTAGCCATAACTATTTTGCTCAGTGCACTCGACTGACAATTGTTAGGGATAAACGAAAGGGGG	-	intergenic	Acon, 3UTR	Acon
P7	novobreak	TRA	3L	15461278	2L	17877675	4	0	somatic_tumour	2416.4	3L:15461278 2L:17877675	0.12	0	-	-	GTCTGGAAATTTGTTGCGCAGGCTATAAAGTCAGTTAAGCCCGGCCCGAAAGGTATTTGTATTCATTCATGATGATTGCAGAAGGAATGAAATGGCGGAAAAGCTGGAAAAAGTGTGGAACGGGACAAGCCGGCAGAGC	-	intergenic	intergenic	-
P7	novobreak	BND	3L	15536381	3L	18522851	3	0	somatic_tumour	2986.5	3L:15536381-18522851	0.07	0.02	-	-	AAATTGATTTTGTTATGAAGATTTCAGTCACACTTCCTTGCTTAAAGCCATATTTAATGTAATTTAAACTGACATTTCGTAGCTGGAAACATTTACAATGCTCTAAGAACTCTTTTAGTTGTTTTTTTTTATTGCGGTTCGGGGATGGTGTG	-	CrebA, 5UTR	intergenic	CrebA
P7	novobreak	TRA	3L	15957251	2R	10368274	9	0	somatic_tumour	5589	3L:15957251 2R:10368274	0.27	0	-	-	CCTTATGGCTGCACGGCTGTTCTCAAGCTAGACGCCTACAATTCCCATTTGGACGAATGCATTCACAATCCGAAGCGACCATTTCCCTCGAACTCGCTTTCCATTATCTTAAATAGGTTTATTC	-	elgi, exon_3	CG42732, intron	elgi, CG42732
P7	novobreak	TRA	3L	16378404	3R	17829423	3	0	somatic_tumour	1451	3L:16378404 3R:17829423	0.11	0	-	-	AACCAGTTCTACATTTCTAGTTTTGTTTTCTGCGCTTTATATTTAGCTACTCGAATTCTCTGAAAAATTTTGGCACTGGTGCTGCACTGACTCACCTTCAAAATGCACATATTATTGCATTAAAGG	-	roq, intron	tinc, intron	roq, tinc
P7	novobreak	TRA	3L	16515633	3R	23429985	7	0	somatic_tumour	6914.4	3L:16515633 3R:23429985	0.29	0	-	-	CTAGTGAAGCTGTGTGCCAAAGCAGCTGCTGCTGTATGTGTGTGTGTGTGTGCATGTGTATCGTTTGTGTGGCTGCGTGTGCTTTGCATCTGTGTGCGTGGCACTGTGCAC	-	CG43373, intron	CG4374, intron	CG43373, CG4374
P7	novobreak	TRA	3L	16669222	X	1733289	3	0	somatic_tumour	14935.9	3L:16669222 X:1733289	0.18	0	-	-	AACTACTTCTTGGCTTTCTTAAATGCCCAGCTCCATAAAGTAGGTGGCCCACGACGGGCTGGTTTCAAGGTTCCAGTTGTTCCTAATTGTCTGTTTGCAAGTCGTCTGGGAGCTGAGAAAGAGTCACGCTTCGAGATAGAGACATTTGGGCATGGCCCTGC	-	intergenic	intergenic	-
P7	novobreak	TRA	3L	16733509	2R	16469695	3	0	somatic_tumour	263.8	3L:16733509 2R:16469695	0.08	0	-	-	GCTCCCATGGTGATGCCACTTTCCTGTTTATCCTCCGTGAATGCAATCCCAGTGACTTAGCTGCATCCAAAGGTCGGCTGTGCGGGCTCCACGTTATAGACAAGTTCTCAG	-	intergenic	intergenic	-
P7	novobreak	TRA	3L	17223570	3R	13134835	3	0	somatic_tumour	4088.7	3L:17223570 3R:13134835	0.1	0	-	-	CGTTAGACTATGCCAAACAATTTGTCATTAATCAATGTTTGGAATTTTCCTGTTTCTCCGCTCGGCTTCGATTTAGGCCTTTGCCTTTTGCAAACTTTTGTTTCTTCTTTGTGCTTTCCTGGAATTTGTCTCCTCGTACAATGC	-	Rbp6, intron	CR45109, ncRNA	Rbp6, timeout, 2mit, CR45109
P7	novobreak	TRA	3L	17413610	2L	4003209	3	0	somatic_tumour	13410.4	3L:17413610 2L:4003209	0.08	0	-	-	CCGTATGGCTAATTTGGAGATCATCCAGCGGGTAGACCAAATGAAATCAAGTAACTCTTAACCCCAGTTCCTTGATCGAAGTGACAATTCAAAGAGCGAATGAAATGCGAAATGCAGCACGAACCACTCAATTAAGT	-	blot, intron	intergenic	blot
P7	novobreak	TRA	3L	17672493	3R	11143854	3	0	somatic_tumour	6528.6	3L:17672493 3R:11143854	0.09	0	-	-	GTGCACCTATTGAGGCTCATTATCTTTTGTTGTTTGCCGGGAATAAACCTCCTTTAGTCCTGGCAACCCCGCTCATCCTCCCTTGGCATTCATGTATGTCTGTATATGGAGCATGGTCGAGGTGGGGGTTATGCGATTTGGATTCGGATTTGTCTGTGGGCGTGTCTTTGGCGAAAAGCTATGGAGAAGCTCCATAGCTTTTCGCCAAAGACACGCCCACAG	-	CG34251, intron	intergenic	CG34251
P7	novobreak	TRA	3L	18755343	X	2543470	3	0	somatic_tumour	16211.9	3L:18755343 X:2543470	0.1	0	-	-	GGGGGCGGTGGTCTGAACGGACCAAGTTCCGTGGGCAACTTCCGATGTGATAAAAAGTGTGAGCGCTGCAGCAAAACAAATCGAATGGAAACGACATGCTCGACAAAATCAAGCAGAGTACCAGAA	-	ftz-f1, exon_5	trol, intron	ftz-f1, trol
P7	novobreak	TRA	3L	19175287	3R	6537214	3	0	somatic_tumour	12638.1	3L:19175287 3R:6537214	0.13	0	-	-	TCATTAAGTCAAAGTGGGGAAAACCTTAGCCGACATGATGTGTCCTTTTTTGCCGGCAGCAAGCTCCTCGGGCTGGATCTCCATAAAACCAAAGTGTTAGTT	-	fz2, intron	dpr11, intron	fz2, dpr11
P7	novobreak	TRA	2L	18935742	X	5594873	3	0	somatic_tumour	13340.9	2L:18935742 X:5594873	0.15	0	-	-	CTCCAGACTCTCGGCCGCTGCAGCGGCGGCAGCAGCGGCTGCCATGAAAATGAGCGCAAATTAAAGGAAAACAATCAGATGGAAAAGAAAGTGGAAAGGGTTTCTAA	-	ssp3, intron	Vsx1, exon_1	ssp3, Vsx1
P7	novobreak	TRA	3L	19461262	3R	26184705	3	0	somatic_tumour	6723.4	3L:19461262 3R:26184705	0.12	0	-	-	CTCCATTGGCATCGGCAGCGCCATCTCAGTCGTCTTGGATGCACGTGGAAATCCTTTTCTTTTCCTTCGAATCTCTCTGTGTCTAGGATCGCAATCGCACC	-	intergenic	CG31323, 3UTR	CG31323
P7	novobreak	TRA	3L	20235301	2L	13213687	3	0	somatic_tumour	7021.6	3L:20235301 2L:13213687	0.07	0	-	-	TCGTTAGACGTGACACAAAAACATCATGTCCGAATTTTCGAATCTTTGATTCATCCTCACGCAACAGTTCTATGTAGATGCGCTGCTTTTGCAGCAGATGCAGGTCAACCAGCAACATCACCAGCAGCAACAGGTGCAGCAA	-	CG17233, exon_6	kek4, exon_2	CG17233, kek4
P7	novobreak	TRA	3L	20235301	2L	13213687	3	0	somatic_tumour	7021.6	3L:20235301 2L:13213687	0.07	0	-	-	TCGTTAGACGTGACACAAAAACATCATGTCCGAATTTTCGAATCTTTGATTCATCCTCACGCAACAGTTCTATGTAGATGCGCTGCTTTTGCAGCAGATGCAGGTCAACCAGCAACATCACCAGCAGCAGCAACAGGTGCAGCAAATGGCGGGTGGCGAATCAACCTACAA	-	CG17233, exon_6	kek4, exon_2	CG17233, kek4
P7	novobreak	TRA	3L	20515625	Y	1113653	3	0	somatic_tumour	19402	3L:20515625 Y:1113653	0.16	0	-	-	CACAAATGGTCATTCATTGAATTATTATTTACATCACCTTAAACGAGTTATTGGTGAAAACAGCTTTACATATGAAGAATTTGCATCGCTGATATGTCAAATC	-	CG5059, intron	intergenic	CG5059
P7	novobreak	TRA	3L	21187911	3R	16508180	3	0	somatic_tumour	4679.7	3L:21187911 3R:16508180	0.1	0	-	-	ATGTTGATGATGATGATTTTGTCCAGTGCAAGAAGTTCGTTTGCATTGGAAATATTTAGAGAAAAGCTGTGGGTTCACTTCGCACCTGGTGGGTCATCCGCATACGCAGTTGACTTATTGATAAGTTTGCGAAAGACTTCATAGCTTTGACTCACTGTGCGGTGAGTGAGCGAGTTTGTTAACC	-	CG42337, intron	CG42342, intron	CG42337, CG42342
P7	novobreak	TRA	3L	21886023	3R	31405444	3	0	somatic_tumour	9519.4	3L:21886023 3R:31405444	0.12	0	-	-	GAAAACCGCAAGAGCGTCGAGCCCTTGTTTTGCGAGCCTTTTCGAAAAAAGCAAACAGTTGCCCAATTTGCCGGAGTCGCATTGCCTAGATAGTTTTTACCCTGTC	-	CR43878, ncRNA	Gprk2, exon_1	mub, CR43878, PNPase, Gprk2
P7	novobreak	TRA	3L	21989678	X	7894615	3	0	somatic_tumour	14095.1	3L:21989678 X:7894615	0.12	0	-	-	CATAATGACGAATGCGCACATCACTGACTACATCCTGCGAATGTGTCCCTACAGGATTCTGGTCAGTCCGATGGGCGTTTCCAAGCTGATGGATCTGCTGACGGACAGCCGCGAAGTGATTCGCAAC	-	intergenic	p115, exon	p115
P7	novobreak	TRA	3L	22077625	2R	19333276	3	0	somatic_tumour	2744.3	3L:22077625 2R:19333276	0.12	0	-	-	CACAAATGTTCCCGAACGTCGGCAAACGGGAATTGCGGAGCGTTTAACTCTTCACGTATGCCGTCAGCCATCTGCAGACACACTCGCTCCCGGTCATCCGGATATTTACAAAGTAATTACTTGCGATAAAATGAATTTCACAAGATGAGAAAA	-	intergenic	CG34045, intron	Rgk1, CG34045
P7	novobreak	TRA	3L	26724963	3R	28984135	3	0	somatic_tumour	2259.2	3L:26724963 3R:28984135	0.13	0	-	-	ACGGAAAAGCGCCGCTTTCCCTAATGACAAATTTTTTCGTACATATAAATTATGCATTAGCCAACGGCAAGCTCGGCGCGGAAAGAGATCACCTGCTATTCCGGATTTTGCCGGTGACGCTGTACGGGAGGAATA	-	intergenic	intergenic	-
P7	novobreak	TRA	3R	8774378	2L	15436924	3	0	somatic_tumour	6662.5	3R:8774378 2L:15436924	0.11	0	-	-	CATCGGAATGAAGCCACCTGCTTTCAATTCCCCGAAAGAGCAGTTGACATAAACCTTTCGCCGGCAGCTCCTCCGCCAAAGGCGCTGACAAGTGGTTGGGTTGTGC	-	Pif1B, 3UTR	intergenic	Pif1A, Pif1B
P7	novobreak	TRA	3R	5321214	Tomelloso	42030	4	0	somatic_tumour	5279.2	3R:5321214 Tomelloso:42030	0.32	0	-	-	GACTTAAAATCAATAAAAGTTAAAACCAGATGCGGCTATGCGTAGATACAAAATGGGACAATGCTCGAGATGCATTCGTCAATTTTACCAAAATCCAATCCC	-	mtd, intron	intergenic	mtd
P7	novobreak	TRA	3R	27023522	Tomelloso	37708	3	0	somatic_tumour	26985.8	3R:27023522 Tomelloso:37708	0.17	0	-	-	CTGATTCTTCGATTGTTGGATGTTAACGAGTATGGAAATTTGTATGTGTTGCCAGTAAATTCCAATCGAGACACCGTACACATTTAAGGTTGGCTCTCAGATGATACCATTGAATTTTATTGGCGAACCAGGCAAAATCTATGAAATTACTTATAAAAATGAGGTTTTACGCCAACGTTGGCGTAAAACCTCATTTTTATAAGTAATTTCATAGATTTTGCCTGGTTCGCCAATAAAATTCAATGGTATCATCTGAGAGCCAACCTTAAATGTGTACGGTGTCTGTCTC	-	RYa-R, intron	intergenic	RYa-R
P7	novobreak	BND	3R	2495844	3R	4817494	3	0	somatic_tumour	2321.7	3R:2495844-4817494	0.07	-0.01	-	-	GTCCTTGACAGTAGGTGACTATAATGACAAACACATAACTAGGGGGTCCAGACTTACCACTCCAAAGGGACGTCGACTTTATGAAGCAATAAGAAACATCCACCTTGATCTGGGAGGCCTGCGCAGCTTCCTCGGAAGCCGCCTCCAATCGCCGCCTGGCGTCATTCGCATTGTATTGGAT	-	Myo81F, intron	CG1126, exon	Myo81F, CG1126
P7	novobreak	TRA	3R	2877391	X	3167258	3	0	somatic_tumour	289.9	3R:2877391 X:3167258	0.14	0	-	-	GGTATAACCAGCTCACCGATAAGGCGCAGTCCAAGCCAAACGCAGAGCATCGAAAAAATGGTGGATATTAATAAGGTTGAGGCTAGGGCGTCAATGGGCGGTGTCCTGAGGCTTTACGCGGCTGACGCTAGAACATTTCGGCCTGCCACTACGATGGTCACGATTGCGAACGGA	-	Pzl, intron	N, exon_6	Pzl, N
P7	novobreak	BND	3R	3324730	3R	18155284	3	0	somatic_tumour	14830.6	3R:3324730-18155284	0.09	0.01	-	-	TTGCTGCACCGCACCCGTAACCAAAAACAAAAAACTCGTCTTTTAAGTAGGCATTCTTGGAAGCGGTGCAAATAAATAATTTGCAGTAGCCGGGCGGCGACCACTCGACGACCCACTGTTGGCCTACCTACCAACCAACCAACCGACTTGGCCAACTGAAACCCCAACTTCGCTCCATCGAAAGCGACGGCCAGACAAATATTT	-	spok, intron	intergenic	spok
P7	novobreak	TRA	3R	3743466	X	1929859	3	0	somatic_tumour	1813.6	3R:3743466 X:1929859	0.14	0	-	-	GGGTGAATCTCGGGCCGCTGCTGTACCATTTTAGCGACGTCAGCGGGCAAAACAGCATCGAGCCACTAATAACCAACCTATGTGACCGGTACCTAATTATTT	-	Tim17b, intron	CG11596, exon	Tim17b, CG11596
P7	novobreak	TRA	3R	4492825	3L	23785097	3	0	somatic_tumour	19292.3	3R:4492825 3L:23785097	0.12	0	-	-	AGCGGCTTCGGAGCTTTAGTCTATCAACCGGCAGTATGTTATGGTATTGACTGATCACAACATTTTCAAATTGATATCATTCACATACTCACACCGCACTG	-	CG34357, 3UTR	CG43968, exon	CG34357, CG43968
P7	novobreak	TRA	3R	4527497	3L	19704476	4	0	somatic_tumour	15177	3R:4527497 3L:19704476	0.15	0	-	-	ATGTCGTTCGTGCAAGAAGAACGAAGTGAGCGTAAACTTATGGCACTCACTGTTTGGGCATGTTATTGCTCGCCGATGCTTGGGTTATCCCCATTCAACTCAAGCGCCGTCTTTTGTTGTCGTATTTTATATTTTCCAATGTTGCTCTTGCTG	-	CG34357, intron	serp, intron	CG34357, serp
P7	lumpy	COMPLEX_BND	3R	4698474	3R	28674525	5	0	somatic_tumour	23976.1	3R:4698474-28674525	0.17	0	-	-	-	-	CG43427, intron	intergenic	CG43427
P7	novobreak	COMPLEX_BND	3R	4698474	3R	28674525	5	0	somatic_tumour	23976.1	3R:4698474-28674525	0.17	0	-	-	AAGCTAGTCGAAAATGTGATTTTCAAACGGCTAATTTTAAGCTCATTTTCAAAGATTTGTTGATTAATGTGCTATAAGTGCTACTAGAATTATTTATCTAACCTAATCTACAAATTTACCCGGGCTCTCTTAGTA	-	CG43427, intron	intergenic	CG43427
P7	novobreak	TRA	3R	5132850	2L	8869424	3	0	somatic_tumour	3736.6	3R:5132850 2L:8869424	0.1	0	-	-	CTTCAATGTCAACTGGTAGCTGGCTATCGAAGGCTTTCGCATAATTAAATGCAACGAAATGTGGCACCCATTTTTCCTCGCACTGGACTTTTTTGTTTTCCATACTACGATACTATTTTCTAC	-	intergenic	intergenic	-
P7	novobreak	TRA	3R	5528084	2R	21689196	3	0	somatic_tumour	16161.1	3R:5528084 2R:21689196	0.08	0	-	-	CCATATACAAAAAGGCATTCTCCCTGAATCTTTCCCACTACCAAATCTCCGACGTTCCGGGCATCATCGAGAAGTGCGAGACGCTGATGAAGCTGTCCGCCTAAGAAGTTCAGGGGTAAGATGGGATATCTTATAC	-	Itp-r83A, exon_3	CG10307, exon_1	Itp-r83A, CG10307
P7	novobreak	TRA	2L	929585	Tomelloso	110406	4	0	somatic_tumour	819.2	2L:929585 Tomelloso:110406	0.18	0	-	-	CACAACAACTGACCACTAATTAACCTAATTCCTAACCCCACATTCCGAATAGGTGGGGCTCCCAGTCGATCCAATTCGATTGCATCCAATTCAATGCTCACCGTTCAAATTATTCAATCAAAAGGGCAGCGTTGGAATC	-	CG4341, intron	intergenic	CG4341
P7	novobreak	TRA	3R	7303920	2L	6657755	3	0	somatic_tumour	646.2	3R:7303920 2L:6657755	0.1	0	-	-	CCGTATAAAAGAAACCCAATCTGCCGGAGCTCACCGTTTTCCCCCGATCTGCCTCAAGACAATGAGTCCGCGTTAATTGAAATGGTAAAAATCGTTATTTTATGAGGGAAACCTCTCCTCAC	-	rn, intron	CG31636, 5UTR	rn, CG31636
P7	novobreak	TRA	3R	7814495	X	1078413	3	0	somatic_tumour	6736.1	3R:7814495 X:1078413	0.1	0	-	-	GGGAATCAGAACGGGCTATCCTCACAGCTCCCGAGGCCAACGTACACAGAGTTATGGATGTGTGTGGTCCTGACCCAAAGGGATTCCGAGCAGGACATAAAAATAGACACGAAGTACTGAAACAATAACTCGAGGCGGCGAGCTAGTGTAGAATTTTTTACATATAGAGTTACGAGGGGAGGAATCAGGAAGTGGCGGATAATTAAGGACAAAAACGCAATTTCAATTATCGTTAGTG	-	CG34384, 5UTR	CG3655, intron	CG34384, CR44779, CG3655
P7	novobreak	TRA	3R	8036115	3L	15094480	3	0	somatic_tumour	7058.4	3R:8036115 3L:15094480	0.09	0	-	-	AAAGATTTCGGAAAATTGGCAGGAAAACAACATTTTTATTAGCAGCTCAGGTGAGAGAGTGCCGAGAGGGGGAGAGAGAAGCACACCTTTCTGTTTTAGCAACAGCTTGTGCCGGAGCTCTGGCCATTATTACTTCAGTGTCCGTCAAGTGCTGCGAGAAGATC	-	unc-45, exon	sstn, exon_1	unc-45, Plp, sstn
P7	novobreak	TRA	3R	8131210	X	2306420	3	0	somatic_tumour	5824.8	3R:8131210 X:2306420	0.13	0	-	-	GTTTGGCTCTTATTTTGCTTTATTTTCTTGCAGACTGTCAGTAGCCGAGTCGGGAGATGGTAAGTTTCCGCGGAGGTGGCAAGGGTAAGAAGGCCAAAACGCGACGACAACTTGGCTGACAAAGGATGTGGCCAGGACTGCTCTGATTCGAATGGGTTTCATC	-	intergenic	Raf, intron	Raf
P7	lumpy	BND	3R	8146531	3R	23340339	3	0	somatic_tumour	15193.8	3R:8146531-23340339	0.09	0	-	-	-	-	intergenic	pnt, exon_2	pnt
P7	novobreak	TRA	3R	8583155	3L	12516644	3	0	somatic_tumour	3933.5	3R:8583155 3L:12516644	0.09	0	-	-	ATATAATTGTCCAACTGTGTACTTGGCCTTTTAATTAAGTTGCCACAACGGCAAATAGCTGGCACTCGGACATCAAGGACATTCGCGTTGTCAACAACCACACGCTGCCGCACCACAATGACCCGGCGATCATGCAGGCGCAGCTCCAGAACGGACC	-	5-HT2B, intron	tral, exon_2	5-HT2B, tral
P7	novobreak	TRA	3R	8860391	2R	11071276	3	0	somatic_tumour	2210.9	3R:8860391 2R:11071276	0.11	0	-	-	ATTTACGAGCCACTGCAGCCAAAGGGGAAGTCCCTGGTCAAATTGAAAATCGTGCAGCTTCATCGCATCCCACTAATGACAAATAATAATTGCTGGCAATTTCTTTAATTCCACT	-	pyd, intron	luna, intron	pyd, luna
P7	delly	TRA	3R	8879051	2L	23025980	3	0	somatic_tumour	14146.9	3R:8879051 2L:23025980	0.14	0	-	-	GCCCCAACGAAACGCATTCAAATTAGCATTTGGGAAGACAAATAAAAAAAAAAAGGGAATGCCACCAGGAGAGAGCAGCATTATTGAATCAGAGAG	-	pyd, intron	intergenic	pyd
P7	novobreak	BND	3R	9314343	3R	24292891	2	2	somatic_tumour	14978.5	3R:9314343-24292891	0.07	0	-	-	ATTTTAATGTGCTTTGCGTGGATTTATGAAGAGCCCTCCAACTATTTTTGCGCCTTATTCACTTCCACTTAAAATCCCGGCACGGATCAACCGGAAACATGGCTCTCTACATGAA	-	CG8861, intron	CG6364, exon_5	CG8861, CG6364
P7	lumpy	BND	3R	9503210	3R	9630428	3	0	somatic_tumour	127.2	3R:9503210-9630428	0.09	-0.02	-	-	-	-	intergenic	Calr, intron	Calr
P7	novobreak	BND	3R	9503210	3R	9630428	3	0	somatic_tumour	127.2	3R:9503210-9630428	0.09	-0.02	-	-	GTCCTCACCCCCGGTACCTTCTACAACGATGCTGAGGCCGACAAAGGTAGCGTATATGTGTCGATGTAGGGGTAATTAAGCCAAAGAACCGCCTTGCGGGTTAGACCGAATAAAATGCGTTTACTGCGAGTATGTGGCACTGGCGTACATGAGTTCAATTAGCCGACACGTTGATGGGGCACTACATTAATT	-	intergenic	Calr, intron	Calr
P7	novobreak	TRA	3R	9544827	2R	15985547	3	0	somatic_tumour	6440.7	3R:9544827 2R:15985547	0.1	0	-	-	ACCTACGCAAAGTTAAGCAAAATACATCAATCAATAGTCATCAATATACTTAGCTATCAATCAAGAAACTCAACTAAAATGCCCGACCTATCCGTCAAAGTGGGCACCCGGACACGCCTCCTAACCGAAATACGCAGCTCA	-	mura, intron	Strn-Mlck, exon_3	mura, Strn-Mlck
P7	novobreak	COMPLEX_TRA	3R	10078173	2L	12871782	9	0	somatic_tumour	2793.6	3R:10078173 2L:12871782	0.3	0	-	-	TCAGTCGCCTTCAAAGTAAATCACTTGAGAGCGGCTCTGGAAAGGCCCACGCCCACTCTGACGCCCACAAATTACAAAACCCTCTCATTGACGTCAGATAGCTGTCTC	-	intergenic	intergenic	-
P7	novobreak	TRA	3R	10366352	2L	8552903	3	0	somatic_tumour	1813.4	3R:10366352 2L:8552903	0.13	0	-	-	GGTTCCTAGCCAAAGGGGATGGATGGGAATGAATGGATGGGGACATCCATGTCCGACGGTAACTGTTGGTGCTAAAATCACTTAAATCATCATTAATAATATTAATATTATTAAAGCCACAGGAATTACTTCCATAACGTT	-	Rfx, intron	Sema-1a, intron	Rfx, Sema-1a
P7	novobreak	TRA	3R	10391617	2R	10222646	3	0	somatic_tumour	169	3R:10391617 2R:10222646	0.11	0	-	-	GCTCCACATGTCAAACATACGTTGCGTATACATAATTATTAGTGGGAAATGCGAAGCTTTGGTGACGTTTCAAGCTTCTATCTTGTATCTCCTGTTGATTTTTTTGACGTGTTGTCTTGCTGAACATCTGTGAG	-	cwo, intron	CG12912, intron	cwo, Hr3, CG12912
P7	novobreak	TRA	3R	18495869	3L	4009987	3	0	somatic_tumour	14485.9	3R:18495869 3L:4009987	0.11	0	-	-	GGTAGAGATTCAGATCCAGGTCCAGATCCTGGCACGACACACAGACAGTTGGTCAGGGCAAGAGAAGTAAAAATAAGATGAAATAAAATGAAAATAATGCCGGACGATAAGGATGGGGATTGGCG	-	fru, intron	intergenic	fru
P7	novobreak	TRA	3R	11371083	3L	21265650	4	0	somatic_tumour	9894.6	3R:11371083 3L:21265650	0.23	0	-	-	GGTTACACCGGGTGGTATCCTTAATTCAGCGCAGCCCATCAACCCTCCCGGCTGCCGTTTTATGCTCCATGTGTACCTTTCGCTTATTGAACTAGAATATCAGGCTGGCGAGCAAGCGATATGCACTTGACACTCAAGTGGACGCTTCACACA	-	pros, intron	Eip78C, 3UTR	pros, Eip78C
P7	novobreak	TRA	3R	11978865	2L	18647011	3	0	somatic_tumour	6668.1	3R:11978865 2L:18647011	0.09	0	-	-	CAGATTCCGTATGTACTCATTCCAAGTGACAAACTTGGCAAACTTGGGCAATTTCCGCTCCACGGAAAAGTGCGGGAATCGCAGAGATCGCGCACTTGGGGCTGT	-	CG18547, intron	MESR3, intron	CG18547, MESR3
P7	novobreak	TRA	X	14825192	2L	9684163	3	0	somatic_tumour	5141	X:14825192 2L:9684163	0.13	0	-	-	CTCTCTCTCTCTCTCCCTTGGTTATTGCTTTTCTTTGCTCTCTCTCTTCGCGTGCCCTTTTTGATTATCTAATCCTTGGGGCAGGTGACATTTTGCTGGCCAACAAAATATACACTTACTCGCAAGGTACCCACACCAACTACTCAAAACTCAAA	-	rut, intron	Pka-C1, 3UTR	rut, Pka-C1
P7	novobreak	TRA	2R	20326536	2L	15133112	3	0	somatic_tumour	5193.4	2R:20326536 2L:15133112	0.1	0	-	-	GTCTGGAACAATGTCGTGTGAAAAGACCGGCACCCGACCCTCTGTGATGTTGATGAGGGTGTCATCCCGGTCCATGGAGACCAGAAGGGGCAGGACCGTTCGATTTCTTAGCGGCGGACACTGCTCCTTTGCCAACCACATTATCGCAGCGCAACGTGCCACCCCATTGGCGTTGCATAAATT	-	MED8, exon	intergenic	MED8
P7	novobreak	TRA	3R	13456855	Tomelloso	83396	9	0	somatic_tumour	13373.5	3R:13456855 Tomelloso:83396	0.57	0	-	-	GTTGAAACATCTCCAATTAAAGTTTCGATGTGTGGGGCCGGCAGTTTGGACAGGCGCGTTTGTGGTCATCGCCCACGGCATTCGGCTCGCTTGAATATTGGTGGCATTGCGTCAGTTTCGATACCATCTTCGCTAACAACCCTGGAG	-	CR17025, ncRNA	intergenic	CG14372, CR17025
P7	novobreak	TRA	3R	13603320	3L	14322590	3	0	somatic_tumour	719.3	3R:13603320 3L:14322590	0.1	0	-	-	CTTTAATTGATTTAGTTTGGCAGTGTGTGGTTTTTTTTTTGTTTTTAGTGGGCGACATTTATTCGAAACAATAGAGCTTGCCACGGTTTCACTTTTTTCGCTTCGCGCATCATTTGTGAGGCTTCTGTTTCTTTTACCCTGACTCGGAGATTATT	-	intergenic	CR45025, exon_2	fz, CR45025
P7	novobreak	TRA	3R	14097309	X	12236550	3	0	somatic_tumour	1860.8	3R:14097309 X:12236550	0.14	0	-	-	TTATACCACAACGTCATAGCAGGCAGAAAAAGAGTTTTGATAAGACACAAAAGGCACACTCACCCTGCCCGTTTTGCTGTAACAAAAGCACACGAAGATGAAGTTGGAGCTGGAGCAGGAACAGTAGGATTCCGGACTCAGGATCCTGGGATCCTGGATCCACGACTTTGGCAGTGGGTTGAAT	-	CG9920, 3UTR	Ten-a, intron	CG9920, Ten-a
P7	novobreak	TANDUP	3R	14487592	3R	26073116	5	0	somatic_tumour	11585.5	3R:14487592-26073116	0.13	0	-	-	GCGGCGGGCTGTGCCTTTGTTTGTCTAGTCAGCGGATCTGAAAACGACGCAATCAATGGATCCGCGACATGCAACGCGGCTGGTCCTCTTCTTTTCTAGCTGGTTTTCCTACTGCTGCTTCTTCTTTTTCCCCTTCTATGCCTTGTTAGGTGCAATGGATGAT	-	intergenic	intergenic	-
P7	novobreak	TRA	3R	14517981	X	1052238	3	0	somatic_tumour	13465.7	3R:14517981 X:1052238	0.14	0	-	-	AAGTCGATTAGCCCGGAGTGGGATCTGCCCCAGCTGGTCTTGGGTCCGAAGCAGTGCGTCTGCATAAACATGCGAAGCACTGCGCGACAGGTGTCATCGTCGACCAGCTCAAAGTCTGGAATACAATGAAATATTTAGAATAGAATAC	-	Pde6, exon_10	CG14629, exon	Pde6, CR44779, CG14629
P7	novobreak	BND	3R	15632832	3R	22865891	5	0	somatic_tumour	7233.1	3R:15632832-22865891	0.17	0	-	-	ACATTTATGGTCAGAACCCACACCCCACATATTTTTTGTATGGCCCGCCGATCGTGGCAATAAAATTGCATTTAATTACACGAGTGCAGTTACATGAACACCTCTCCAATCATTTAATTATTTAAATTTAATGCAGCGCCTTTTTTG	-	intergenic	intergenic	-
P7	novobreak	TRA	2L	8093153	X	17811386	7	0	somatic_tumour	9718.2	2L:8093153 X:17811386	0.23	0	-	-	GTAATTTCCCTTTCAATGTCATCGTCGCCTGGCGTTGGCTTCAGTTTAGTTTGGTCTCATATTGGATTGGGTTGCGTCTGGCTGGGCTTGGGTTGAGTTTGAGTTTGGAACTTGAGTTCTATGGGATAATTGTGCGCCCTATCAATGGCTGGC	-	Bsg, intron	OdsH, intron	Bsg, OdsH
P7	novobreak	TRA	3R	15965831	2L	8095215	4	0	somatic_tumour	7870.6	3R:15965831 2L:8095215	0.14	0	-	-	GACCTTGGAAATGTGAAACAATTTTCTGTTCTTTCATTTGTGTCCGGATTTTGATTAGAGTGCCGTTGTGTTATTTACCATCAACGAGGCAAACGATTCGGTGGCCAAGAACTGCTGCTGGAACGTGTCACTAACCCGTCTGCTGCGCAGCTTTAAGATGAACG	-	Rbf2, exon	Bsg, intron	Rbf2, Bsg
P7	novobreak	TRA	3R	16107173	4	1079805	2	1	somatic_tumour	15027.4	3R:16107173 4:1079805	0.12	0	-	-	TTTTTCGCGCTTTTCATTTGCCAAGCAATTTTTCTATTTTCACCTCCAGCTCTTGGGGAAAAAAAAAAAATTGTCGGCGGCATTTTTTGGGTCGTTAGAGT	-	intergenic	Actbeta, intron	Actbeta
P7	novobreak	BND	3R	16137027	3R	17537987	2	1	somatic_tumour	1401	3R:16137027-17537987	0.08	0	-	-	ACAGTCCCAACTCAGATTCCCCATCGTAAGTGGTAAGGCAGTCGTCGTAGCATCGAGCGACCGCCCAGCCGTATTCAACTTCCTGCAGGGCATTGTACACATGTC	-	Sb, intron	l(3)07882, exon_2	Sb, l(3)07882
P7	novobreak	TRA	3R	16837724	2R	16346437	3	0	somatic_tumour	491.3	3R:16837724 2R:16346437	0.12	0	-	-	CTTGGAGTCACTAGACCATGTGAATCCCTTCACTTTGCCCTCCTGCTTGAAGCTGTGCAGCAGCTCATTTGTTTTGGCCGAAGTGGTTGATCCGGTTTACGGAATCCCCACCCAATCCCCTTGAAACCACTATCCG	-	iab-8, ncRNA	wcd, exon	iab-8, wcd
P7	novobreak	TRA	3R	17224933	X	16333798	4	1	somatic_tumour	891.1	3R:17224933 X:16333798	0.17	0	-	-	TTTCCGCATTCGCATTGATACGATACCATACTGTGTGCTGTGTACTGTGTACTGTATAGCATATATACCATACCACCTACAAAATGTAGACAGATAAATAT	-	intergenic	Dsp1, exon_1	Dsp1
P7	novobreak	TRA	3R	17314237	3L	15862703	3	0	somatic_tumour	1451.5	3R:17314237 3L:15862703	0.1	0	-	-	AGCCAAAAATTGCCTAGTTTAAGTTAAGAAGTCATGCAATGCACAAGGACTCAAAGGAGTTGGGCGTTTACCAAATACGAGTGCAGGAAATAGACTTGAACTGTATATATAAATGTAATCCATCCCTTGTTCAACTCAAAG	-	intergenic	pHCl, intron	pHCl
P7	lumpy	BND	3R	17965477	3R	19184464	2	1	somatic_tumour	1219	3R:17965477-19184464	0.08	0	-	-	-	-	cpo, intron	CG31475, intron	cpo, CG31475
P7	novobreak	TRA	2L	754880	2R	9245145	2	1	somatic_tumour	8490.3	2L:754880 2R:9245145	0.1	0	-	-	CCATAAACCTTTGAGCCATAAACATTTCCACAGCCCACAAATTATGAGGTCCACAAATTCACTTAGAGCATTTGCATTTGGCCTTTGAAGTTTCACCCATTTCCATGTGCTGTCCCATAAATCCTGGGTCCCCAGGATGGATG	-	GABA-B-R3, intron	hig, intron	GABA-B-R3, hig
P7	novobreak	TRA	3R	19248035	3L	21214277	3	0	somatic_tumour	1966.2	3R:19248035 3L:21214277	0.1	0	-	-	ACTTTGGAGCGGGGGCCACCTCGGGACCTTCCACAGACAGGCCCTCGGGGTCGGCAAGCGGAATATCTTGCAGACTGGACATCTTCGTCCTCGTCCTGGACTATTTGTAGGATTTGCGTAGCCCTA	-	CG5217, 5UTR	CG10508, exon_2	CG5217, CG10508
P7	novobreak	BND	3R	19415605	3R	24504160	3	0	somatic_tumour	5088.6	3R:19415605-24504160	0.1	-0.01	-	-	GTCCGCACACTTGACGTGTATTTCCGTTTCCGTTATGCGAAAACTTTTTTTCAAATTTTTCTCTTATCTTTTCAGTGTAGAAAAATGTAAAAAGTCGACTAAAAACATATATCT	-	CG31221, intron	intergenic	CG31221
P7	novobreak	BND	3R	20723488	3R	27111159	2	1	somatic_tumour	6387.7	3R:20723488-27111159	0.08	-0.01	-	-	TGATTGGGTCCGGCCATAATTTGAGCCATACGTGCGCCGCTATTCAACGGGAAATTCATTTAGCGCACAAATAACGCAATTCTATTAAATAAATTGATTTCGAATTACTTTATTATCGCCAGAAGGAAC	-	intergenic	gb, intron	gb
P7	novobreak	TRA	3R	21011147	X	16658279	3	0	somatic_tumour	4352.9	3R:21011147 X:16658279	0.16	0	-	-	GTAAAAACCCCGCTTTAATCTCTGTTCTTTATCTATTTCCCGTCACCACTTCGTTTGTATGCCACCACAAACTATGTCTGTCTAGTTATACCCTTCAGGGATTTGTCCACAATTAGTTGGCTCGAGTGGGCCAATGCC	-	Calx, intron	r, exon_3	Calx, r
P7	novobreak	BND	3R	21111973	3R	29996361	2	1	somatic_tumour	8884.4	3R:21111973-29996361	0.07	-0.01	-	-	GTCCTGTTGCAAAGCCAGAGTGTGCACTCTAAAAGAGCAAAATGACAAACTGCACGGGGATGTGGCCAACATCAGGAAGACTAATTGAAACTAATTGGAGAATAACAAAAAGTGCACTCGAAGAGCCCAAAGTTCATGTGATGGTAT	-	Rab11, intron	Sas-6, exon_2	Rab11, Sas-6
P7	novobreak	TRA	3R	21522369	2R	20880549	3	0	somatic_tumour	641.8	3R:21522369 2R:20880549	0.14	0	-	-	CTTAAGGGCAGTCCTCATTAGTCGGCGGTCAATATTTGCAAGCTCGATGAAAAATTCATTTTTAAGTTTCTGAATGAAAAGTTAAGTTAACTGAAGTTACTCATAGTGTATTTTATAAATACTTTAGG	-	CG7956, intron	Cib2, intron	CG7956, Cib2
P7	novobreak	BND	3R	22380685	3R	23743829	2	1	somatic_tumour	1363.1	3R:22380685-23743829	0.1	-0.01	-	-	GTCCAGGAGTTCCGGATTTGCCAGCAGCGTAGCAAGTACTATCACCAGCGTAAATTGGTAGTGATGGAGCCCTTGGCTGAGAACCACGAGTTGGAGCCGCCTTCCACTCCAGAGCATATGCCCGTGGTGGCCATTGCTGATCAAAGCGGGCTACCCAGAAATCCCAAAAGGGGAGAATGCGATGCGTCATTATTTGCCTTGGTACCTCACTTC	-	CG34149, exon	Hmgcr, intron	CG34149, Hmgcr
P7	novobreak	BND	3R	22729440	3R	31190245	3	0	somatic_tumour	8460.8	3R:22729440-31190245	0.08	-0.02	-	-	AACTAATTAATGCACTTTTCAGTGTCTGCCTCTCTGTGTGTGCGATTGCGGAATTTGTAAGGCCAAGCTCTTTTAAATGCTGTCAAATGCCAGTCTGAGGCCATTAACCAATCTGTAGACGCCAGAGCCATAATCATG	-	CG45049, exon_3	mesh, intron	CG45049, mesh
P7	novobreak	TRA	3R	22858550	3L	19921160	3	0	somatic_tumour	2937.4	3R:22858550 3L:19921160	0.09	0	-	-	GTACGAGATATAAATGCCTTCTCTTTACCTTGAGTCCACCGGATACAGATACACTACGTGCACGTGCTGGTGACCGAGGTGCGTCGCACGGGGCCGCAGGTGCGGGCAAACGAGGAGCCAGATGGACCGGCCAAGTCGTAGGGCGATCCGGC	-	intergenic	Su(z)12, exon_4	Su(z)12
P7	novobreak	BND	3R	22880093	3R	31167338	3	0	somatic_tumour	8287.2	3R:22880093-31167338	0.09	-0.02	-	-	CGCTTACGCACACATATGCATTTAAATTAAATTATTTAGTTGGCCCGGCTCCACTTACCCAGCAGCTTGACTTAATTTGCAACAAATCGTATTTGAATTTATGCAGACAAAGCTATTTTT	-	intergenic	stops, exon_3	Gycbeta100B, stops
P7	novobreak	BND	3R	23290823	3R	26814498	3	0	somatic_tumour	3523.7	3R:23290823-26814498	0.08	0.01	-	-	ATACAAGCCACTGTGAAATAAATATTCCCCGAAAACTTTTGACATGCAGCCATGAATAAAATGTTGCGCTCTAATATCACTTTTGGGGGACACATGCTTTATGGCCTCTATCAACGTTCGATCCTTGC	-	pnt, 3UTR	Tl, intron	pnt, Tl
P7	novobreak	TRA	2R	16573386	X	654211	3	0	somatic_tumour	15919.2	2R:16573386 X:654211	0.19	0	-	-	CAATAGCACCACGGATGATGCCCAGCCGCAGGATTTCCGGGTGCTCAACTATGTGGTGCATCCGGCTTACGGCGAGGATGATGACACGGGCAGTCGCAAGAACGACATTGCCGGGTTGATTGGGTTTGGTGGAATTGGTATATCTAAGA	-	CG4927, exon	Hmt4-20, intron	CG4927, Hmt4-20
P7	novobreak	TRA	3R	24068453	X	8554485	4	0	somatic_tumour	15514	3R:24068453 X:8554485	0.13	0	-	-	ATCCAGATCGCAACTAACGCGAAACCTAGCATGTATATTTCCCATGTGCATGTGGGCAAAGGTTCAGCAACAGGAAGTTGAGCTCATGGTAAATGTAGAGATGTAAATGTAAAATAGAACCCGACACAGGCAGTGCAGTTGTTGTTGTTGTTCT	-	4EHP, intron	Nrg, 3UTR	4EHP, Nrg
P7	novobreak	TRA	3R	24424110	2R	16067336	4	0	somatic_tumour	8356.8	3R:24424110 2R:16067336	0.12	0	-	-	AACGGGAAGAAAAATTGAGAAAATATGTTGCAAATGTAAACAAAGTGTGGGAAAAGTGAAAGAAAGGAACTTTGATTTTGTTTGGTTGGGATTGAGGGAAGAGACCGGCTTATTGCGGAACGAGCTTGATTTCAGCACTTGGAAG	-	nAChRalpha1, intron	intergenic	nAChRalpha1
P7	novobreak	BND	3R	24464861	3R	29934585	3	0	somatic_tumour	5469.7	3R:24464861-29934585	0.09	-0.01	-	-	GTAATGTCGAGCCCCTATTTATTCATCTCAAACAGTCATATTAAACAAAGGTATTTAAGTAGGCCTTCGTCGCCTCTCTCTCGCTCTCTCGCTCTCTCTCTCTCCCTCTGTTACCAACACACAT	-	intergenic	eIF2B-alpha, 3UTR	CG42558, CG42557, eIF2B-alpha
P7	novobreak	TRA	3R	25178095	X	9023520	11	0	somatic_tumour	16154.6	3R:25178095 X:9023520	0.41	0	-	-	GAGAGAGAGAGCAAGCAAGCGAAAACGTATTACCAAACGAGCAAGACAGCGAATTTTAGTGACATCTGCAGTTCACCCGGAATGTTACGCCTCCATTTCCGAACTAATATTGTCAGGGGAC	-	lobo, intron	CR43836, ncRNA	lobo, rdgA, CR43836
P7	novobreak	COMPLEX_BND	3R	25224799	3R	27858723	7	0	somatic_tumour	2633.9	3R:25224799-27858723	0.19	-0.01	-	-	GTGAAATTTTTCGCAGCCAAGATTGTTATATACTTCAACGAGGAGTTTGTGCGTTAATAGGAAAATCGTGTGGCCGCATAGCTCTCCCGCTGGCGCTCCCGGTCCCGCTCCCTCTCTCGTTCCCGCTCCAGCAAGGCGGCGGAACTACCGAGGGCCATGCTACTAC	-	Cad96Cb, exon_5	CG34353, intron	Cad96Cb, CG34353
P7	lumpy	COMPLEX_TANDUP	3R	27858723	3R	29378659	7	0	somatic_tumour	1519.9	3R:27858723-29378659	0.27	-0.01	-	-	-	-	CG34353, intron	Ptp99A, intron	CG34353, Ptp99A
P7	novobreak	TRA	3R	25451883	2L	3915983	3	0	somatic_tumour	21535.9	3R:25451883 2L:3915983	0.12	0	-	-	ATTTGATTTCTCAAATCCCTTAAGCCGTCTTGTAACCAATTAAAAACAAGGCACCATCTTCGCCAGTTTCCAGCCAAAGGCATCGGAGGAGTTTACAGTAC	-	Fur1, intron	fred, intron	Fur1, fred
P7	novobreak	TRA	3R	26601204	3L	16506756	3	0	somatic_tumour	10094.4	3R:26601204 3L:16506756	0.12	0	-	-	AGGCTTTCTTGGCCTTGCTTCCATTAGTAGTTAGTGTGCTCCAATCCCTCAGTCGCATTTCCTCAGAGGAATCATTTCAAATCACTGACAGTGTGTCAAAGCG	-	scrib, intron	CG43373, intron	scrib, CG43373
P7	novobreak	TRA	3R	27886177	4	681646	7	0	somatic_tumour	27204.5	3R:27886177 4:681646	0.19	0	-	-	CCCCAGGTAAGCTGCACAGCAGCACCATAGCCACCATTGCCACCAGCTGCAGAGCGATATTAATGTGAATGGCTGCCAAGCCGTGGCTCTAGAGGTGGCTCGAGGCGAACAGCTCTTTTCTACGCATACAGTGATAGCAGACAACTGTAT	-	CG34353, intron	CG11360, intron	CG34353, CG11360
P7	novobreak	TRA	3R	28505348	2L	19858175	5	0	somatic_tumour	8647.2	3R:28505348 2L:19858175	0.15	0	-	-	TTATGAGTCACTCCCATTTTTTGCGTTAATTGTTTTTTACACGACCAAAAAAAAAAAAAAAAAGCACCTGCATTTGAGCCCCACGCGGGTCGACATTGAGC	-	Dhc98D, intron	sick, intron	Dhc98D, sick
P7	novobreak	TRA	3L	22345448	X	1084302	3	0	somatic_tumour	21261.1	3L:22345448 X:1084302	0.12	0	-	-	GTCACGTTTCATGTGTCGACGGATACAGATCCAGGCGAGCGATTAAATCAATTATACGGAAATTATGAAAACTCAATTTGCAGGAAAATTCAAGTGATCTAGGGCATCACGCCAACAGCTCAGCCCCAT	-	CR45963, ncRNA	CG3655, intron	Ten-m, CR45963, CR44779, CG3655
P7	novobreak	COMPLEX_TRA	3R	29093901	X	9570740	3	0	somatic_tumour	19523.2	3R:29093901 X:9570740	0.17	0	-	-	TATAGTTATTGAGCTTTTATAGTCTGAGACCTTTTATTTTATTAAGTCTGCAGAAACACTTTGCCACTACCTTTCAGTTCAAAGTTTTTTCCAGCTGCCTTCCTCCACTCCGCTTTTC	-	CG11873, intron	Cubn, intron	CG11873, Cubn
P7	novobreak	TRA	3R	29124945	2L	19976776	3	0	somatic_tumour	9148.2	3R:29124945 2L:19976776	0.14	0	-	-	AGGTTTAGAAGGTAGTAAGATTTCAATTAAGAAGATACTTCCCCAAAGACCAGCCCATCCAAAGCCATTCTTAAAGTTCATTTATCCAGTAGAAAACTTTGCT	-	CG11880, intron	CG43861, intron	CG11880, CG43861
P7	novobreak	TRA	3R	29167919	2R	15445156	3	0	somatic_tumour	13722.8	3R:29167919 2R:15445156	0.11	0	-	-	CGCATGCGAATTAGAAGGGAACTTGATTTATTGGCAAACAGAATGATATTTCATCCTTGAATAGGATATCTACCTCCTGGACGATCCACTATCCGCCGTGGACTCTCATGTGAGCAAGATGCTCC	-	CG11898, exon_3	CG43729, intron	CG11898, CG43729
P7	novobreak	TRA	3R	29356650	X	14475084	3	0	somatic_tumour	14881.6	3R:29356650 X:14475084	0.14	0	-	-	AATGTATCCTGTTTTCGGAAACCGGAAAAACTTTTCCAGGCACTGCATGATCCTGGCTGATCACCGGCTGGTCCGTTTCCGTTGCCGGGCAGGGACACAGGCAGTGGTGGTGGTCCGTAGTTCGGTGGCGGGGCATCGAAGATCTGCTTG	-	CR45547, exon_1	CG9411, exon_2	CR45547, CG9411
P7	novobreak	TRA	3R	29496606	3L	19987997	3	0	somatic_tumour	9508.6	3R:29496606 3L:19987997	0.18	0	-	-	ATTCGGAACCACTTGCTTATATAAAAAAAAAAATATAGCTACACACGGGGCAAACTACAAAATCAAACCAACATTCAAGATCAATGAACTTTACACTTTCTTTGATGAATAGCATATCTA	-	CG2010, 5UTR	schuy, exon	CG2010, schuy
P7	novobreak	TRA	X	10029282	2R	17794206	4	0	somatic_tumour	7764.9	X:10029282 2R:17794206	0.16	0	-	-	AAAAAAAAACATAAAACAAAACGAAAACTAAAACCTTCGGCGCGTTAATGCAATTAGCAAACTTGATTGTTCATCTCATAATCACATCGTATATAGTATAC	-	Cht6, intron	Dhit, exon_1	Cht6, Dhit
P7	novobreak	TRA	3R	29896992	2L	17290172	3	0	somatic_tumour	12606.8	3R:29896992 2L:17290172	0.09	0	-	-	CCAGTTTAAATCCACTTAAAAGCCTTGAGTTAAGGATCAACAATTAAATGTCTTGCAAATGGAAAGCTTCGCTGAAGGTGGGAAAATAATGGGCGCTTTCCTTAATGGTAAATGCATTTAATCCGATCCTCAGCTCCTCGTCGTCCTTCTCGTCCAGATTGAAGAAGCC	-	CG31038, exon_2	intergenic	CG31038
P7	novobreak	TRA	3R	30958706	X	15633295	3	0	somatic_tumour	15325.4	3R:30958706 X:15633295	0.13	0	-	-	AAAAACTAGGGGCGACAATGAACAATGAAATAGAATATCGAGATATGGAAATATATGTTCTATATGTTCGTTTCGTTTATATGTATATGCGGGCATATATCAAGGAAATAAAAGTGGTTCCTTGACAACTTTGCCGCCTCCTTCGGCTTTTC	-	intergenic	sog, exon_1	sog
P7	novobreak	TRA	2L	8796945	3L	8681254	2	1	somatic_tumour	115.7	2L:8796945 3L:8681254	0.12	0	-	-	GTTTGGGATTATTGTTTTAAAAAATTATCATTGCATCTCATGCCTGATGCTTTTATTTTAATGGTACATATGTTGTGCGCAACTGTGGCGAATTCGTTTTGTATTGTGGGCTGATGGC	-	intergenic	intergenic	-
P7	novobreak	TRA	3R	31723068	2R	19386269	3	0	somatic_tumour	12336.8	3R:31723068 2R:19386269	0.12	0	-	-	GTTAATTTGTGAGCCCTGTCACCGATTATACTTCCAACCTCCGCTCTCGCACACACACATGCATCTACCGCCCCACGAGGATGCCTCCAAAGGAGGATTCATTGCCGAAAGGGCACAGGCCAATCTTTATGAT	-	ttk, intron	CG10081, exon_2	ttk, CG10081
P7	delly	TRA	4	153406	2R	13870504	3	0	somatic_tumour	13717.1	4:153406 2R:13870504	0.2	0	-	-	GCGCCATTATAAAAATAGAAGGTTCACAAAAGAAGTTTTAGTTAAAAATACTTACGCGCTTGCGCCAATCGTCCCAGCTGAAGTTGCGGGCACGCTCCACA	-	CG32006, 3UTR	shot, intron	CG32006, shot
P7	Control-Freec	DUP	4	238800	4	246760	-	-	somatic_tumour	8	4:238800-246760	0.42	0.56	-	-	-	-	CG1674, intron	intergenic	CG1674
P7	novobreak	TRA	4	361203	2R	7716386	3	0	somatic_tumour	7355.2	4:361203 2R:7716386	0.11	0	-	-	CGAGGTGGACATATTTGATCAGGTGGCTAATCCTCCGGACTCCTCGCTCCGTCGCTTCCAGAATGTGGTCAATAAATTAACATATTTAAGAAAAATTAAAT	-	Hcf, intron	CG1946, exon_5	Hcf, CG1946
P7	novobreak	TRA	4	767082	3R	29444279	3	0	somatic_tumour	28677.2	4:767082 3R:29444279	0.11	0	-	-	CTTTATAATCGAGCATCAAACACAAAAAGCAGCGAGAGCATAAAAAGAAAATCAGAGCGCTTCTTCGAGCTAAAGACCCAATTGACCCACCATCGCCACCGGGCAGTCCTCAAATC	-	bt, exon_33	Ptp99A, intron	bt, Ptp99A
P7	novobreak	TRA	Tomelloso	89374	X	5502632	3	0	somatic_tumour	5413.3	Tomelloso:89374 X:5502632	0.33	0	-	-	ACAGCACTTAATTCGTTGCTATTTTTCTTTACTGCTTCACATTTTCTTGGTCGCCGACCAGTGAAAAACCATGAGGAACGTCTTATTGTAATTGGGTGAACCTGT	-	intergenic	CG4151, 3UTR	CG4151
P7	novobreak	TRA	X	1507824	2L	2326470	3	0	somatic_tumour	818.6	X:1507824 2L:2326470	0.14	0	-	-	GAACGGAGCGCGCTCTGCGGACTGAATTCGATGAGCCACCGAATGGCACTGTCAGGCAGCCATGGGATGGCTCCCGGTGCACATGTCTGTTATGGTCTTGGCACGGCATAAGCAC	-	inc, intron	eys, intron	inc, CG9967, eys
P7	novobreak	TRA	3L	6688918	X	2201760	1	2	somatic_tumour	4487.2	3L:6688918 X:2201760	0.13	0	-	-	CTATAAACATGTAGCAGAGGGTCCAAAACAACATCTTCCCCCTCCGGTCGAACACCTTCATCCACGATAACTGAGTCCATAGTCCTGTGTAAATATTTTGCCAGCACTTGGTCTGGCAATATACGAGTCCTTGTGTGGAAAGACGGAGAAAACGGCACAGGAT	-	intergenic	CR43637, exon_1	Mct1, CR43637
P7	novobreak	COMPLEX_TRA	X	2361568	2L	1040805	3	0	somatic_tumour	1320.8	X:2361568 2L:1040805	0.15	0	-	-	GAGTTTTTATATTTTATTTTCGTCAGCAGCTTTCAGGTTCAAAGCAATTAAGTAATAACACAAATCAAAGTTAACAAAGGCTAAACGTAAAAATAAAGGCCTCTTCGGCGAAAAAGGACCTCTCCGTCC	-	CG2841, intron	IA-2, intron	CG2841, IA-2
P7	novobreak	COMPLEX_TRA	X	10913342	3R	31508451	3	0	somatic_tumour	20595.1	X:10913342 3R:31508451	0.1	0	-	-	CTTCGATGTGTCGTTGGCTCTTTATAAGGAGCCGAACAGAGGCCTTGGCCATTCAGTTGTCCGCTGGGCAAATGTTTATGTCAAACGAGAAGCTGCTCCCCGAGCCAAGCTGGGCAGGATGTCAAC	-	CG43901, intron	intergenic	CG43901
P7	Control-Freec	DEL	X	2992960	X	3136240	-	-	somatic_tumour	143.3	X:2992960-3136240	0.95	-3.36	-	-	-	-	kirre, intron	N, intron	kirre, CG4116, N
P7	novobreak	DEL	X	2993986	X	3135245	4	5	somatic_tumour	141.3	X:2993986-3135245	1	-3.4	-	-	CATATAGACAGATTCCAAGTGTCCCCCAGTCTCCGAAAACCAAAACCAAATCCAAATCCAAATCCAAAGCCAAAGCCAAAAACCAAAACTTCCCAAATACATTTCAATTTGTGCGGCTATGGCGATAAGTCCAAGTTTATCCTGTGGCAAACTGGAAGCGCAAGAGGAAGAGAGCAAGAGTGCGGCGTCGGTTTGAATTTGAATTTGTGGCTCGATCCTCGCGAAGAGA	-	kirre, intron	N, 5UTR	kirre, CG4116, N
P7	CNV-Seq	DEL	X	2994440	X	3135403	-	-	somatic_tumour	140	X:2994440-3135403	0.96	-3.4	-	-	-	-	kirre, intron	N, 5UTR	kirre, CG4116, N
P7	lumpy	BND	X	4041826	X	6740758	4	0	somatic_tumour	2698.9	X:4041826-6740758	0.15	0.01	-	-	-	-	intergenic	intergenic	-
P7	novobreak	TRA	X	4858505	2L	99087	3	0	somatic_tumour	4759.4	X:4858505 2L:99087	0.13	0	-	-	ACAGGTGCTAAAAGTATGTGCACAGGACTCGCATATATAGAAAGCTTCGGCATTAGTTTTTAGTTTTGAAGCATTTGGTGCACTCTATGCGGACTTAAATCCATA	-	CG42594, intron	Zir, exon_6	CG42594, Zir
P7	novobreak	BND	X	6488371	X	6723574	3	0	somatic_tumour	235.2	X:6488371-6723574	0.12	-0.03	-	-	TCTTGCGACCAAAGCTATCGGCGATGCTGCCCCAGAAGTAAGCGCCCACCATCATGCCGATGAAGATGATCGAGTTCAGCCAGCCCTTGCTTCAGTTTTCCCGCTTTGCCCCACTTTCATTGAACTCTGCGTACACGGAGAGAAATCAATTGCAAACTCATTACTA	-	CG42340, intron	CG3168, exon_3	CG42340, CG3168
P7	novobreak	TRA	2R	20675427	3R	25614365	3	0	somatic_tumour	4938.9	2R:20675427 3R:25614365	0.11	0	-	-	ATGTTTCTACCTTGAAAATGCATCAAAAAATATTTCATATCAGTTTCGATTCTATCCTTGCAATGGACAACAATGGTTCTGCAGCCGGATTCGGAATGGTGTCTGATGGC	-	intergenic	CG5079, 3UTR	Npl4, CG5079
P7	novobreak	COMPLEX_BND	3L	773471	3L	17169554	3	0	somatic_tumour	16396.1	3L:773471-17169554	0.1	0	-	-	CAGCAATTGTTGCATGTAATTAACCAACTTTGACATGTCTAGTTATGCGTTGCTTCGGTAGGCGTAACTTCAATCCAATGTTCAAGTGGGTCACACAAAATTGCAGAACAAAAGCAGGAGGAGGCCGAGTGCCACAAAGTTGAGGACAGAGATTGTTGCAATTTCAGGGGTGACGATA	-	intergenic	Rbp6, intron	Rbp6
P7	novobreak	TRA	3L	2792826	2R	6691710	3	0	somatic_tumour	3898.9	3L:2792826 2R:6691710	0.1	0	-	-	TCCTTGGGTTGTATACCCAATCCCAGGCAGGTTCCGTCCTTTAAGTGCTCGGCGGTGGGTGGACGAGTGCCGCCTCAAAATGATGCACTACCGCAAGGCCGAGAA	-	Tet, exon_6	CG9422, 5UTR	Tet, CG9422
P7	novobreak	TRA	X	13204168	3L	10945030	3	0	somatic_tumour	2259.1	X:13204168 3L:10945030	0.11	0	-	-	CAGGTCAACAGCAGCAGCAGCAGCAAGAGCAACAGCAGCAATCCGAACGTGTTGCTGATACGTGCGGAAAAAAGGATGGAAAGTTTTTGTAAGTATTATGTTATCTTCAAAATAAGTTGTACAAATTAT	-	sno, intron	intergenic	sno
P7	novobreak	COMPLEX_TRA	X	13367330	2R	16621538	3	0	somatic_tumour	3254.2	X:13367330 2R:16621538	0.16	0	-	-	AGACAGGTAAAGGACAATAACTTTGCAAGCATTTACCATATGATTCCATGTTAAACTTGGGCTTCTCCTGACGCAGTGATTCGAAGAGCTAAGGAATATATCTGTCT	-	Syt12, 3UTR	CG5065, exon_4	Syt12, CG5065
P7	novobreak	TRA	3R	7717269	3L	2366535	4	0	somatic_tumour	5350.7	3R:7717269 3L:2366535	0.13	0	-	-	TGTTTGTTCTGCGGTGCAGAGTTCAATGGGTCGTGAAATTTCGGCGCCATAAAATTGCATTGCATTTTGATGCCATGTCAGCCGGGAGAATGTTTGCGA	-	intergenic	intergenic	-
P7	novobreak	BND	X	18123863	X	18124056	7	0	somatic_tumour	0.2	X:18123863-18124056	0.46	0	-	-	CCCCAGACATAATCTGCAAAGGACACTGTTTGCGACATCAGAGATGGCGATGTGATGCTGGTTCTGCCGCTGAGTCGCGATGATAAAAAAAATGAAGGAAAAAGGAAAATACCGAGGAGCACGAAGGCTTGGGGCCCAGTGACGTCACGGCTGGCATTCATTCACAGGATGTGAGGCATGCATCCAATGGCGGCCGCGCTGCTGTGCTGCAAATTGAGATTTTCAATTTTGCGTTTTTACGTGGAACG	-	intergenic	intergenic	-
P7	novobreak	TRA	2L	3430606	2R	13302064	5	0	somatic_tumour	9871.5	2L:3430606 2R:13302064	0.18	0	-	-	GCATAAGGAAAGTGGGAACAATTGCAATGCGAAAATTTAATTAAGTTGCAGCCGGAGCAAGCAGGAACTTTTCTGCCCCCCACCTGGATCCTTCGCGGGAACCCGAGGGGCTCCACCGGCTGGCTGGCTGGGTGAGAGTGATTCTCGGAGCCGGCGCTGCTAAATGAGCCATGATCGCTGGAAGAA	-	intergenic	intergenic	-
P7	novobreak	TRA	2R	13307015	3L	8948818	3	1	somatic_tumour	4358.2	2R:13307015 3L:8948818	0.13	0	-	-	ATCCGCATCCCTCTTCGGCGTAAGTAAAAAGTGCAGCAATAGTGAAATGCTGTCCAAGAAATAGGAAAACGCCTATCTAAGTTACCATAAGCGTTATGGCCATGGCCAAAACAGTGTCGATGATGCCCGAAAAGTTGGCGCAATGGAGCGCGAAACTAATAAGGATAACGCGCGGG	-	intergenic	orb2, intron	CG43783, orb2
P7	novobreak	TRA	3L	1240576	2L	16116646	3	0	somatic_tumour	14876.1	3L:1240576 2L:16116646	0.11	0	-	-	AGACAGTCTTTTAACTTTTTAATGAACTCCAAGTTAACTTTAAATTCAGTTTAAAGGTCTAAATTGAGAAATCAAAGGGATCAAGGCCCTAGACTCCATGCCCAGATCTGCTCACCAAAGGCAACGCCAGAAGGACAGAGAACGGGAACGATCTCC	-	CG9194, exon_5	intergenic	CG9194
P7	novobreak	TRA	X	19590257	3R	4898617	3	0	somatic_tumour	14691.6	X:19590257 3R:4898617	0.16	0	-	-	CACACGTTCAGCGCTGATAATCAATTCTTATCTATAGTCTCCTTCCATCAGCTAATATTGATTGCTATTGATGAGATCCCGCCTTTGATGATATGGGTACTGT	-	intergenic	intergenic	-
P7	novobreak	TRA	X	20285348	2L	6186256	3	0	somatic_tumour	14099.1	X:20285348 2L:6186256	0.14	0	-	-	GCGCCTTGGGATCAAATTAGTCGAGTTTTTGAAAAAAAAGCTTACATATACGTGTGGCAATCAATGCAACTGAGCGGGGCACGTCATCAGTGATGGTAGCGAAACAAGGATCATTGCGGCTGGTGCATACCCCTCAGCCGTATGTATGT	-	intergenic	CG34380, intron	CG34380
P7	novobreak	TRA	X	21233073	2R	3184553	3	0	somatic_tumour	18048.5	X:21233073 2R:3184553	0.14	0	-	-	GACCACCTTTGGCCCGAACTTTTCCGGCAGAAAAGCAGAAAAACAGTTTTCGCTCTCCACTCTGCCTGTTTCAATAGAAAGTGATGCCATTCGGACTGCACTCCGC	-	CG32521, intron	dpr21, intron	CG32521, dpr21
P7	novobreak	TRA	Y	472705	3L	17470613	3	0	somatic_tumour	16997.9	Y:472705 3L:17470613	0.13	0	-	-	CACTCACTTCTTCTCCGTGCTATCCTTCGAACCACACTCGGCGACAGCGACCATACGCTGCCGCTAGCGAAATGATTCGATTTCGTTGGCTTGTAAAATTATATGCT	-	kl-3, intron	CG7589, 5UTR	kl-3, CG7589
P9	novobreak	TRA	2L	647432	X	6244020	3	0	somatic_tumour	5596.6	2L:647432 X:6244020	0.07	0	-	-	TTATTGACAATCAATGATGACAACAATTGCTTGTTCCTGCGTTGCTTTGTAATGGAAGTAACCGTGTTCCAAACGCTATTCTCATCGGTCGGCTCTTCGGATGTGGAACCAGTACCACCACTTGCTCCG	NHEJ	ds, intron	Rbcn-3A, exon_5	ds, Rbcn-3A
P9	novobreak	BND	2L	2380873	2L	12288901	3	2	somatic_tumour	9908	2L:2380873-12288901	0.06	0	TTTACGAA	-	CATAAATTGTCCGGAATAGTGTGAAGCCATTCAAAAATTCGTATTAAAATAACGGTCTAAATGGTTTACGAAACCGATTGCAGTTGAATTATTTATCATGTCAGATGATGATGAG	Alt-EJ	intergenic	bru1, intron	bru1
P9	novobreak	TRA	2L	2565270	2R	13513152	3	0	somatic_tumour	10947.9	2L:2565270 2R:13513152	0.06	0	T	-	GGCCAATGGAACACCTATAAGGACACAAGTGAAAGTTCACCAACAACTTCAGTTACATATTTGTATTTTGCATTTGCATTGTTTCAAATTTATTGATGGGCGAGTATATTAAACTCAACGCAA	Alt-EJ	Cyp309a2, intron	Vmat, 3UTR	Cyp309a2, Vmat
P9	novobreak	BND	2L	2615845	2L	6605512	3	0	somatic_tumour	3989.7	2L:2615845-6605512	0.04	-0.04	GCC	-	ATGGAAGAGACAGGAAAAAAAAAATAGGAAAAAACTCATCAGGCTTAAACTACTTAAACTTTAGTCCGTAGTAAAGATTTTTGGTGTCAAAGTTTCAGTGCAACAAGTTTGGGAAAATATAAAAGATAAATATATGTATC	Alt-EJ	intergenic	intergenic	-
P9	novobreak	TRA	2L	3829232	X	18495746	3	0	somatic_tumour	14666.5	2L:3829232 X:18495746	0.08	0	GGGATTTC	-	GGTATACCCAACCAATTCTATTCTAAAGTGATATGTAGTTTAAGAAATCCCCCAGGCTTGGATCCTCCCAAATATCAATTGAATATCTATTGTATGAGATTCGCCGATCGAAATGGGAATGGGTTCACTA	Alt-EJ	intergenic	GalNAc-T2, 3UTR	GalNAc-T2
P9	novobreak	TRA	2L	5445521	3R	12213592	3	0	somatic_tumour	6768.1	2L:5445521 3R:12213592	0.06	0	CAAATTA	-	CTTCATTGCTGCGTAGCTGTCACAATTTGTAGGAAATTAATTCCAAGTGGCCAAAATAAATAAACAGTCACAAATTACATTGGATAACTTTAAAACGAAAAACTTACCA	Alt-EJ	intergenic	intergenic	-
P9	novobreak	TRA	2L	6096637	2R	19944064	3	0	somatic_tumour	13847.4	2L:6096637 2R:19944064	0.05	0	C	-	GTCGGTTTACCATTTGCATTTGATTTGTTGTCACCCATTGTTATTGCCTCTGTTATTTTATGCAAATTCGCTCGTTGGAATATTTTACCATGTTTGCCACCTCATTGAAAGCGAATAAAACATCGAAATTTCATTACTGAATGCATTTTTATATAT	Alt-EJ	intergenic	intergenic	-
P9	novobreak	TRA	2L	8797450	2R	11568588	3	0	somatic_tumour	2771.1	2L:8797450 2R:11568588	0.05	0	-	-	TGTCCAAAAGGGGACCTGGTGGGGGGGGGGATCGGATCCTAGAAAATGCACTGAGAAACAAGGATTTTATTTTAGGATTCATGTTGGCCATGCGCGAGCCTCGACCT	NHEJ	intergenic	intergenic	-
P9	novobreak	TRA	2L	9843172	2R	8311676	3	0	somatic_tumour	1531.5	2L:9843172 2R:8311676	0.05	0	-	-	GTTTTCAAATGTTAAACATCTTCCAAAAGCAAACCATAGAAAATGTTGATTAAAGTTTTGCTTTTTCAGTTTCCTGGCTAAATTGCACAAAAACTGGAGGGTAATCGGAGGGGAGAGCACGTGTGTATGGAGTGTGTGTTCTTAACATAACACATAAACACAAGTA	NHEJ	nAChRalpha6, intron	CR44450, exon_1	nAChRalpha6, CR44450
P9	novobreak	TRA	2L	16418430	2R	13530335	4	0	somatic_tumour	2888.1	2L:16418430 2R:13530335	0.08	0	-	-	AAATGAAGCCGATGGCAATTGGGCGACAGGGGAAATGAAAGGCCAACCTGGGAGCTGCTGACTGGCAGCAATCGAAAGCTATGCAAATTAAAAAAATTGCAATAAATTCTCCTGGTTTACATGCATTATTCTGGTATGGAATAAAAACATACACGCGATATG	NHEJ	CG5888, intron	Vmat, intron	CG5888, Vmat
P9	novobreak	TRA	2R	5850303	3R	5246121	3	0	somatic_tumour	604.2	2R:5850303 3R:5246121	0.04	0	-	-	AACTTTATGGCATTTTAAACAACATCGCAAGCCATACCAAATGGAGGCCTGCCATGCATACAAAAGCAGGAATAAATAATGTGAGTGTGTGTGTGTACAAACATTTTCGCTTTCTATCTTTTCACCACCAAAACCA	NHEJ	dpr12, intron	CG12163, intron	dpr12, CG12163
P9	novobreak	TRA	2R	6532200	2L	21283344	3	0	somatic_tumour	14751.1	2R:6532200 2L:21283344	0.04	0	T	-	CAATCCGGTCAGGGTGTCATAGCTAAGTTGGTGGTTATGGCTAGACTGAAGGTCAACCCGGAGCTCCGCCTGCAATCGATATTTACCTGCGACTACTTGGCCGTTAAGGGTTTCGGGTACCAGTGAATCAGTTC	Alt-EJ	jing, intron	Cyp6t2Psi, exon_1	jing, Cyp6t2Psi
P9	novobreak	TRA	2R	9334321	3L	12325601	4	0	somatic_tumour	2991.3	2R:9334321 3L:12325601	0.07	0	CCAAAAC	-	TGCCTAGGTCCTGCGGAACCTACCCAAACTCCGAGTGGCGAGCCTTGCCAAAACCAGACGATAACTTTGACCGGAGACCGGAGCCGAAACCTTTTGCCTGTTTGCATTAAAAGCTTTTTAATTTGTATTC	Alt-EJ	CG13954, intron	intergenic	CG13739, CG13954
P9	novobreak	BND	2R	9418566	2R	10140104	2	1	somatic_tumour	721.5	2R:9418566-10140104	0.03	0.02	GCACT	-	CTGTTCATCTTCATCAAGTGCCAGCTGGACATTCTGGCCGTCCGACTGGACAAGATCGGTCGGTTAATCACTACTTCTGGTGGCACTCAGGCCACTCGGACATCACGAAAAGATTGATGTGGCCGTAAAAGATCGAAAGACAAACAAGACATC	Alt-EJ	intergenic	Or46a, exon_1	CR43467, Or46a
P9	novobreak	TRA	2R	10667716	3L	9876984	14	0	somatic_tumour	790.7	2R:10667716 3L:9876984	0.21	0	CAA	-	CTCCTGACTGCGGCTGACGGACGGAGTCAAGTCGGTGGCCAAAATACATTCAATCAATTTTCGGTGTTCAGTGTGCGCAAGCAGTTTAAGCTTCAATTAAAAAT	Alt-EJ	intergenic	intergenic	-
P9	novobreak	TRA	2R	12455384	3L	8284008	1	2	somatic_tumour	4171.4	2R:12455384 3L:8284008	0.05	0	G	-	TCGTTACATCCGATAGCCAGCTTAATTCCCGGGGCTTTGTATCTATCAGCTATCAGCTTCGGCTTGTGCAATCTTTAATTGCCACGGCATTGAGCAGATCGATCGCGTGTGCAAGGAGCAACTGCATTACGCACGCGAGGGCGT	Alt-EJ	Lac, intron	cert, intron	Lac, cert
P9	novobreak	TRA	2R	12682096	3R	14789306	3	0	somatic_tumour	2107.2	2R:12682096 3R:14789306	0.04	0	-	-	GTTCCGAGAGCAGGTGGAGCGATTAAATCGCGAGGATATCAAACAGCTGCGCAAGGAGCGCGACCGTCTGCTTGACAAGTTTGGAGAACTCGGTGAGCCTGGAGAAATCGCAGGGCCTCAATAATTCGGACAGTTC	NHEJ	CG8771, exon_6	jvl, exon_4	CG8771, jvl
P9	Control-Freec	DUP	2R	17263776	2R	17279648	-	-	somatic_tumour	15.9	2R:17263776-17279648	0.34	0.56	-	-	-	-	mbl, intron	mbl, intron	mbl
P9	novobreak	TRA	2R	21549103	3R	13697225	3	0	somatic_tumour	7851.9	2R:21549103 3R:13697225	0.05	0	G	-	GGCGGTGTCTGTTTGCACAGTACTTTGAGGCAAATGTTTGTATTTGGCGGGCAAACAGAAAAGTAAAAATTAAATGGATCTGGAATGGAAGATAATTATTATAATTGGGATTTCATTTCA	Alt-EJ	Egfr, intron	f-cup, exon_8	Egfr, f-cup
P9	novobreak	TRA	2R	23141212	3R	21364381	3	0	somatic_tumour	1776.8	2R:23141212 3R:21364381	0.04	0	CCCTT	-	CATAGATAGCGACCAAACTGGAAACTGGAAATGGCGTCAAGGGAGGTAGATGTGTTTTGACAGACATTAGTTGAGGTTATTTTGGGAGATCCAGGTGAGACCACTAACTAGTGCACAAT	Alt-EJ	intergenic	pre-mod(mdg4)-AB, 5UTR	mod(mdg4), pre-mod(mdg4)-C, pre-mod(mdg4)-E, pre-mod(mdg4)-AB
P9	novobreak	TRA	2R	23480790	3R	6773848	3	0	somatic_tumour	16706.9	2R:23480790 3R:6773848	0.05	0	GTAG	-	TTTCTCCGGCCGACGGGCAAGGAAAGCCGGAGAAAGGACGTGGCTATGGCCACAACTCCGGCGTGAAAATGCGGACGAGTAGTTTTCGGGGGGCCGAAAGGAAAATGGCTTCATCGGAAGGCGACTGTAAAAATTCGCCATGA	Alt-EJ	CG43795, intron	CR42721, ncRNA	CG43795, CR42721
P9	novobreak	BND	3L	1355758	3L	17182517	3	0	somatic_tumour	15826.8	3L:1355758-17182517	0.03	0.01	-	-	CACTCGCTTTCCTCTTCAAAATTTATGTTTGCTGGCTATGAAAATGAAATGACTGTGGTAAACATTTTAATTAAATCCACGTTGCCAGAGGAACTAGTTAAATGGATCTGTCGAGAGGGTAGGTAAATCATTTTGCTAATTCGTTTTGCATTCAATGCCAATT	NHEJ	Ptp61F, intron	Rbp6, intron	Ptp61F, Rbp6
P9	novobreak	TRA	3L	3277631	3R	18109064	4	0	somatic_tumour	14831.4	3L:3277631 3R:18109064	0.07	0	-	-	GCATAGTTGCCTTCCAAGCAGTTGACCCGGGTTCGATTCCCGTTCGACTTGAGTAACGAGACGAGTCGAGATGTGTCCACTCGAGCCGAGCTGAGTCCGTGG	NHEJ	intergenic	tRNA:Gly-TCC-1-4, tRNA	sr, tRNA:Gly-TCC-1-4
P9	novobreak	BND	3L	3943272	3L	8345790	3	0	somatic_tumour	4402.5	3L:3943272-8345790	0.03	0	TGCG	-	GGTCACAACTCTATCGTCTTGGTCCTCCCTGTCGGAGGGTACAGTGTGCTCCATCCGGAACACCAGCTCCTCCTTGTCAAAGTCGCAAAAACTAGACCAGACCAAGGTGAAACGAATGAGCCAGCGACGACACGCAC	Alt-EJ	CG14982, exon_1	CG7182, exon	CG14982, CG7182
P9	novobreak	BND	3L	4542472	3L	6515347	3	1	somatic_tumour	1972.9	3L:4542472-6515347	0.04	0	-	-	CAATTAAAGTCGGACAACACCATCGTTAAATGAATTAAAAGTGAATAAAAGCGCTGTCAACGCCTTTTTGGCCCTGCCTCATGTAAAAGCAATAAATAATGGCCCAGTTTATAC	-	CG11357, exon_1	sfl, intron	CG11357, sfl
P9	novobreak	TRA	3L	4762617	2L	13601230	3	0	somatic_tumour	8838.6	3L:4762617 2L:13601230	0.06	0	C	-	CTCATCGATCCTTTGCCTTTGCCTAAACTGACGTAAATTTATAATGACAAATTGCATTTGGCGAAGTGCAACCGATGTATTTCATTGTGTTGGTAAATTATAATTAAGC	Alt-EJ	RhoGEF64C, intron	kuz, intron	RhoGEF64C, kuz
P9	novobreak	TRA	3L	7116471	2R	4966685	20	0	somatic_tumour	2149.8	3L:7116471 2R:4966685	0.27	0	A	-	CCTTTAAAAAATTCTAATTCCGAATGAAAGTCAACAGAACTCGTATTTGCCTTCGTTATTTCAGGGGGATTGTTAGAACCGTGTCAAGAATAGACATTTTCGATTACTGAAGTATTTTTATGGAGTGTCCAAAGAGTCGAAAACACAATTGGAA	Alt-EJ	form3, intron	Ir41a, intron	form3, Ir41a
P9	novobreak	BND	3L	9039625	3L	12080473	3	0	somatic_tumour	3040.8	3L:9039625-12080473	0.03	0.02	CTGCTGC	-	GAACGGCGCCAGAGAATCGTAAAATATTTTTATACAAATATCGCAGCAGATAAACGAATGTATTGGGGTGTCATAAAAGCGGTTTGTTGGGGAACTCGGTTAAATCGAGATCATTG	Alt-EJ	intergenic	Sema-5c, intron	Sema-5c
P9	novobreak	TRA	3L	12130274	3R	10211411	3	0	somatic_tumour	1918.9	3L:12130274 3R:10211411	0.06	0	GTGCCA	-	GCCTACTAACCGGATTTTCTCTCCCTCAATAAGCAATTGCGGTTAAGATAATGTTAAGGTGCCAACCGAATCCGGCTATGCCAGCAACCTGCGCACCTACTACGGCGTACCCCAATGGCACCGGGAGAA	Alt-EJ	Lsp2, exon	Timp, intron	CR11538, Lsp2, Syn, Timp
P9	novobreak	TRA	3L	16590696	3R	31425288	3	0	somatic_tumour	14834.6	3L:16590696 3R:31425288	0.05	0	C	-	CTTGTGCTCCTTCTTTCTGCTGTCCCTCTCCCTGTTAGCAATCAGTGAGCGCCAAAATCAATTTATCTAAGAGCTAATCAAAGCCGGTCGGTCTGCCAATCCTTTCGACCGGCAATTAAAGCG	Alt-EJ	tra, exon_2	Gprk2, intron	tra, Gprk2
P9	novobreak	BND	3L	16701356	3L	21227591	7	0	somatic_tumour	4526.2	3L:16701356-21227591	0.08	0.02	-	-	GCCTAATGCTCCTCTTCTACGCAATCAAATGTCTGTTTGCTCTTCTCTATTTAAATTGGGCATTACCAACGCTCCGGTGATATATGTTTCCTCCTGCTTAACTTGGAGCTGCTGCTGCTCCGAAGACGAGTGCTTCACACAGGTTTCGACCAGCAGTTT	-	CR45897, ncRNA	Eip78C, exon_2	Lasp, CG43954, CR45897, Eip78C
P9	novobreak	TRA	3L	22127698	X	3678445	3	0	somatic_tumour	18449.3	3L:22127698 X:3678445	0.06	0	TTACCCC	-	CTTAAGGCAGGCGGGAGATGGCAGGAGTATTCTAATCCAATCGAAGCATTTATCAGCGTAACCGATCGACAAAAGTCGAGAGTTATGCATCAAAGTCACGAGGCGATGAGCTAACTGAGATAGTCTCGTCCCCAGAGCAATTACCCCTTCATTTTTATTTGCTAGCATCCAAGTCAATGTTACTTGACATTTATC	Alt-EJ	intergenic	Mnt, intron	Mnt
P9	novobreak	BND	3R	9861512	3R	30513691	3	0	somatic_tumour	20652.2	3R:9861512-30513691	0.03	0.01	T	-	GCCAGAATCCATTGTTCGGCAATCGTCCATCGCGATTGATTCATCAAATGTCGACCCATTGCAAGGCAATCGATAGGTGACAAATTTCCATTACTTGTTCGGTTCAATTGGAGA	Alt-EJ	Teh1, intron	CG31524, exon_4	Teh1, CG31524
P9	novobreak	TRA	3R	11181613	2R	24432165	3	0	somatic_tumour	13250.6	3R:11181613 2R:24432165	0.05	0	AG	-	GGAGATCCCCCCTCCAAGAGGAGTGCCCGCAGCCTGGACCTGGCCTCCACTTCCACTTGTTGTTTCGGCCACATCGCGGGTAAATACGTTTAAGTGTCGGTGCTCTTCTTCCCAAAAG	Alt-EJ	intergenic	Pgam5-2, exon	Pgam5-2
P9	delly	DEL	3R	11562988	3R	11563037	14	4	somatic_tumour	0.1	3R:11562988-11563037	0.35	0	A	-	CAACAAAGTGGACAGAGCTTTTGGGGCGGACTGGAAAAGCTCCGCTGAAGAACAACAAGAAGACATTTTTTCTTTAGCGATTACACAATGAGTTCACACACACACAATGCGCGTAGCCTACGCA	Alt-EJ	sea, intron	sea, intron	fabp, sea
P9	novobreak	BND	3R	16378760	3R	20573305	2	1	somatic_tumour	4194.5	3R:16378760-20573305	0.03	0.03	TTGGC	-	GTGTACCACTTAATAAATGGTTCCACTTCGCTGCCCGTCATGGAGAATCTTACTACAGTCGGACCTGTTTTTGCCAACATGGGGCGCATTTTCAATTTGCGCGCATTTTGATTTATACGCCCCAAAAACCCCGGGCGAATAAGAG	Alt-EJ	ss, intron	intergenic	ss
P9	novobreak	BND	3R	24200976	3R	26609536	2	1	somatic_tumour	2408.6	3R:24200976-26609536	0.03	0.01	-	-	ATATTAAAGCGGGTGCTTTAAAATCGAATTTAAGCGATGCATTTCCAGTTGCAACAGCTGTTGCAGACAGATAAAGGAGTCGGAGTCCGAACCGCTGGCCATCGGAGAGATTAGGTTCCACATTCCCACTGCCACTGTATCGCTGTATCGCCGAGCGGTGCACCC	NHEJ	twin, exon_1	intergenic	twin
P9	novobreak	TRA	3R	25330986	X	12452678	3	0	somatic_tumour	12878.3	3R:25330986 X:12452678	0.05	0	TCAATTTGTAGG	-	ATTAAGGTATTGAATATATTACCAACATGTTGTAGTCTTAATTTTATAGATTTAGCTATCATCTACTTTTAATGCTTACCTCTCAATTTGTAGGCGCAGCACGATCGTCAAATAGTTTTCCCCTT	Alt-EJ	CHKov2, exon_1	Pkcdelta, exon_14	CHKov2, Pkcdelta
P9	novobreak	TRA	4	418098	2L	13037524	3	0	somatic_tumour	12619.4	4:418098 2L:13037524	0.04	0	AGACA	-	CCATACATGAGACGGGTCTCAATGGCAGGCTTAAATGTCAAGTGTCCGTGTCTTATTTTCAATTAATACATTTCCAAAAACGTTTTAGCCAAGTCCAATCTAATGCCCATAATC	Alt-EJ	intergenic	CG9932, intron	CG9932
P9	novobreak	DEL	X	3135326	X	3139096	15	8	somatic_tumour	3.8	X:3135326-3139096	0.74	-1.2	A	GA	GTATCTACCTCGAGTCGCGCGTGTGTGAGAGTGAGACGAAAGCCGAGTGCAAGAAGCGCAAGAGGAAGAGAGCAAGAGTGCGGCGTCGGTTTGAATTTGAATTTGTGGCTCGATCCTCGCGAAGAGATATGAAATCGGCTAATTTCTCAAGTGTTAAATCTGCTGTTACTCCTTGCCTTTCGCTTGGCCAAAATAAAAAAAAAAACAAAACCTGTAAG	Alt-EJ	N, 5UTR	N, intron	N
P9	lumpy	DEL	X	3135326	X	3139096	15	8	somatic_tumour	3.8	X:3135326-3139096	0.74	-1.2	A	GA	-	Alt-EJ	N, 5UTR	N, intron	N
P9	novobreak	BND	X	4697763	X	5073382	2	1	somatic_tumour	375.6	X:4697763-5073382	0.09	0.03	GATGGAAA	-	GTTTTTGGGGTCACATTTTTGGTTACCCCAGTGACAGAACCTACTCACACCCCCGCCCCCCATTTGGGCTGATGGAAAATGGATGTATAACTGTGAAGCCAAGAAAAGTCCAATTAAGAACACATTCACAC	Alt-EJ	ctp, intron	CG32767, 3UTR	ctp, CG32767
P9	novobreak	TRA	2R	23186121	3L	14239313	3	0	somatic_tumour	8946.8	2R:23186121 3L:14239313	0.04	0	CTTGGCCAT	-	GACTTAGTTTCGCTCCATCTGGCCGCCTGCTGCGTGTCTGGCCTTCTTTGCTCTGTTTTTGGCCAGGTCCGCAGTGCCACGCATGCGTCTTGGCCATAAGCCAGAAAAAAGGGGTTAAAAGCATCATCGAATTGATTTAAAATCTGATTTTTATAAACGTCTCAGT	Alt-EJ	CG34371, intron	CR45399, exon_1	CG34371, CR45399
P11	novobreak	BND	2L	5103277	2L	16264626	2	1	somatic_tumour	11161.3	2L:5103277-16264626	0.03	0.02	C	-	GTACTGGTGGTGCGACAGTGGCGTCTGTCGATTGCTGATGGTTTTTATAGAGTTCAAGGAATCATCAATTAAACATGCTTAAACAATTTCGGCATCTCGTTCAA	Alt-EJ	Msp300, exon_2	crp, 3UTR	Msp300, crp
P11	novobreak	TRA	3L	2558343	Tomelloso	81606	3	0	somatic_tumour	2476.7	3L:2558343 Tomelloso:81606	0.07	0	-	-	AACGTCGCTCATATTGATATTTATCATTGCGATTGTTTACGTTTTGAATACTGTAAACAAAACTACCAGTCTGCAGCCACTTTATGAGGAATTGTTAAAGCAGAGCGTTTATCGCCAGCAGCGGAAGCGGTGGTCTCGGTTTGGGGGGCGGTACCGTTGTGGGC	NHEJ	msn, exon_13	intergenic	msn
P11	novobreak	TRA	3L	3312018	Tomelloso	102060	4	0	somatic_tumour	3210	3L:3312018 Tomelloso:102060	0.13	0	-	-	CGGCAAGCGACTCTTCAAAACTTCATCAGTGTTGCCAATCAAAATCTGACAACCGTGTCGACCAATTGAACGATAGGCATGCGTTGTTATATTTTCCTTCTGCTTCTCGTAGGCAAAGTCGTTTTGCTCATCCTCGCCCTCGTCCATGTTGGCCAACTCAGTGAGGCGGC	NHEJ	ZnT63C, exon_5	intergenic	ZnT63C
P11	novobreak	BND	3R	11288316	3R	21490211	3	0	somatic_tumour	10201.9	3R:11288316-21490211	0.03	0.04	ATAGA	-	CATAACGCGGGGATGGACAGCGCTGTTCTAACTCCTTTCTATCATATCTCCTGACAAATTGATATTGTCTAAGCCATTTTCGATATGCATATTTATGTTCTCGATAGGTTTCTTTGTTTGACTCACGAC	Alt-EJ	CR31386, ncRNA	intergenic	CR31386
P11	novobreak	TRA	3R	14990196	2R	18680738	3	0	somatic_tumour	3690.5	3R:14990196 2R:18680738	0.04	0	AAGGACATTGA	-	AATTTCGGCACAAGAGGCAGCAGGAAGTCACTCAGCCAGTTGCCTTGCGTCCTTGCAAACAAAAAGAGCAACAAAGGACATTGATGGCTCAGACAAGGACGTGGTCCT	Alt-EJ	intergenic	CG44435, exon_1	CG44434, CG44435
P11	novobreak	TRA	3R	21395894	2L	15133724	3	0	somatic_tumour	6262.2	3R:21395894 2L:15133724	0.04	0	-	-	ATTAGCAGCAATTTTCAATTTCCTTTCTGATGAAGCACATGGCAAGAGAGCAAATTACATGGCGCACAAAGTGCAGAGGCGGCTTTGGAAATTGGAGGGCGTGGCTGTCCGTCCGGAAAGGACAGCCGACAGCAGCATTGATGGATACGATGCGCACGTG	NHEJ	intergenic	intergenic	-
P11	lumpy	DEL	X	3117762	X	3177111	2	2	somatic_tumour	59.3	X:3117762-3177111	0.26	-0.82	-	-	-	-	kirre, intron	dnc, intron	kirre, N, CG18508, Fcp3C, CG3939, dnc
P11	Control-Freec	DEL	X	3117915	X	3274245	-	-	somatic_tumour	156.3	X:3117915-3274245	0.63	-0.68	-	-	-	-	kirre, intron	dnc, intron	kirre, N, CG18508, Fcp3C, CG3939, CG14265, ng2, ng3, ng1, ng4, Pig1, Sgs4, dnc
P11	novobreak	DEL	X	3189060	X	3273846	13	14	somatic_tumour	84.8	X:3189060-3273846	0.63	-0.62	-	-	GATGGAATCGCACTGAGCGTTTATTTTTCGAATTCATTATCATATGATGTTTTGATGTTTAAATATTGCTCGATTTATATGGATAGTTTATGTTGCTTCAGCGATATTTCAAGGAAATGTGCACTTTTTTTTGCCTTTTGAGATATGAACAAATCACGTAGGCTTAAACTTCTATTTGTTGACGTGATCTTTTTGATTTGCTTTAGTTATAATTAAGATTTGTCCGCTTCGTGATTTGCCATTTCCTTTGCTTAGTTTTCTCTCACGTTTCACGACGTTTTCGCTTTCCATTTTCATTTCCATGAAATTTCTAGCATTCCTTTGCGGCTTTTTGTGGTGTTCACTGTACCTGTCCTAACGGAACAATTTGCCACAATAGCTG	-	dnc, intron	dnc, intron	dnc, CG14265, ng2, ng3, ng1, ng4, Pig1, Sgs4
P11	lumpy	DEL	X	3189060	X	3273846	13	14	somatic_tumour	84.8	X:3189060-3273846	0.63	-0.62	-	-	-	-	dnc, intron	dnc, intron	dnc, CG14265, ng2, ng3, ng1, ng4, Pig1, Sgs4
P11	novobreak	DEL	X	3189060	X	3273846	13	14	somatic_tumour	84.8	X:3189060-3273846	0.63	-0.62	-	-	TAATTAAGATTTGTCCGCTTCGTGATTTGCCATTTCCTTTGCTTAGTTTTCTCTCACGTTTCACGACGTTTTCGCTTTCCATTTTCATTTCCATGAAATTTCTAGCATTCCTTTGCGGCTTTTTGTGGTGTTCACTGTACCTGTCCTAACGGAACAATTTGCCACAATAGCTGCGACCCGTGCTCACTC	-	dnc, intron	dnc, intron	dnc, CG14265, ng2, ng3, ng1, ng4, Pig1, Sgs4
P15	CNV-Seq	TANDUP	2R	1328600	2R	1333994	-	-	somatic_tumour	5.4	2R:1328600-1333994	0.38	0.63	-		-	-	intergenic	intergenic	-
P15	Control-Freec	DUP	2R	2953206	2R	2969730	-	-	somatic_tumour	16.5	2R:2953206-2969730	0.33	0.52	-		-	-	Scp1, intron	intergenic	Scp1
P15	Control-Freec	DUP	2R	6086340	2R	6092766	-	-	somatic_tumour	6.4	2R:6086340-6092766	0.39	0.65	-		-	-	intergenic	EcR, exon	EcR
P15	Control-Freec	DUP	2R	6159780	2R	6173550	-	-	somatic_tumour	13.8	2R:6159780-6173550	0.38	0.56	-		-	-	EcR, intron	intergenic	EcR, tRNA:Arg-ACG-1-2, tRNA:Asn-GTT-1-4, tRNA:Asn-GTT-1-5, tRNA:Asn-GTT-1-6, tRNA:Lys-CTT-1-2, tRNA:Lys-CTT-1-3, tRNA:Lys-CTT-1-4, tRNA:Ile-AAT-1-1, tRNA:Arg-ACG-1-3, tRNA:Lys-CTT-1-5, tRNA:Arg-ACG-1-4
P15	Control-Freec	DUP	3L	22784760	3L	22793940	-	-	somatic_tumour	9.2	3L:22784760-22793940	0.37	0.44	-		-	-	SPoCk, 3UTR	jim, 3UTR	SPoCk, CG14448, jim
P15	Control-Freec	DUP	3R	4296240	3R	4307256	-	-	somatic_tumour	11	3R:4296240-4307256	0.32	0.41	-		-	-	cpx, 3UTR	intergenic	cpx
P15	Control-Freec	DUP	3R	15169950	3R	15184638	-	-	somatic_tumour	14.7	3R:15169950-15184638	0.34	0.42	-		-	-	Gyc88E, intron	Gyc88E, intron	Gyc88E, Mf
P15	Control-Freec	DUP	3R	18413244	3R	18420588	-	-	somatic_tumour	7.3	3R:18413244-18420588	0.34	0.46	-		-	-	intergenic	fru, 3UTR	fru
P15	Control-Freec	DUP	3R	21584934	3R	21622572	-	-	somatic_tumour	37.6	3R:21584934-21622572	0.27	0.31	-		-	-	InR, intron	E2f1, intron	InR, CR43653, CR44034, mir-998, mir-11, E2f1
P15	Control-Freec	DUP	3R	22007214	3R	22012722	-	-	somatic_tumour	5.5	3R:22007214-22012722	0.4	0.55	-		-	-	Eip93F, 3UTR	Eip93F, 3UTR	Eip93F
P15	Control-Freec	DUP	4	687582	4	690336	-	-	somatic_tumour	2.8	4:687582-690336	0.48	0.56	-		-	-	CG11360, 3UTR	CG11360, 3UTR	CG11360
P15	Control-Freec	DUP	4	878526	4	882198	-	-	somatic_tumour	3.7	4:878526-882198	0.47	0.47	-		-	-	unc-13, intron	CR44029, ncRNA	unc-13, CR44029
P23	CNV-Seq	DEL	X	2796789	X	3312289	-	-	somatic_tumour	515	X:2796789-3312289	0.75	-1.04	-		-	-	kirre, intron	dnc, intron	kirre, CG12498, CG14416, CG14417, CG14418, CG14419, CG3526, CG3588, CG14424, CG32793, CG3592, CG3598, CG14420, CG14421, CG14422, CG14423, CG17959, CG3603, rst, CG4116, N, CG18508, Fcp3C, CG3939, CG14265, ng2, ng3, ng1, ng4, Pig1, Sgs4, dnc
P25	Control-Freec	DUP	3L	10725616	3L	10732768	-	-	somatic_tumour	7.2	3L:10725616-10732768	0.38	0.42	-	-	-	-	intergenic	intergenic	-
P25	novobreak	DEL	3L	11261338	3L	11263598	11	0	somatic_tumour	2.3	3L:11261338-11263598	0.31	-0.58	T	-	ATTTGTTTGTACACTTTCCATTTGTACCTGGCTTGGCAACAAAGCGACAATCACAAAAAGCAGAAGAAGCACTAGCAGCAAACAGCAACAACAAACAACAACAACAACAACACTAATGAACGGCGAAGGTTTCGTTAGTGTAATACTGTGATATTTAGATGGCATCTACCCGGGAATTCAGATAGCATTTGCACAGCAACTGCAGTGCTGCATTGATGCAGTGCAGCACAT	Alt-EJ	intergenic	intergenic	-
P25	delly	DEL	3L	11261338	3L	11263598	11	0	somatic_tumour	2.3	3L:11261338-11263598	0.31	-0.58	T	-	ACAAAGCGACAATCACAAAAAGCAGAAGAAGCACTAGCAGCAAACAGCAACAACAAACAACAACAACAACAACACTAATGAACGGCGAAGGTTTCGTTAGTGTAATACTGTGATATTTAGATGGCATCTACCCGGGAATTCAGATAGCATTTGCACAGCAACTGCAGTGCTGCATTGATGCAGTGCAGCAC	Alt-EJ	intergenic	intergenic	-
P25	lumpy	DEL	3L	11261338	3L	11263598	11	0	somatic_tumour	2.3	3L:11261338-11263598	0.31	-0.58	T	-	-	Alt-EJ	intergenic	intergenic	-
P25	Control-Freec	DUP	3R	4162464	3R	4169616	-	-	somatic_tumour	7.2	3R:4162464-4169616	0.4	0.49	-	-	-	-	intergenic	intergenic	-
P25	Control-Freec	DUP	4	228864	4	236016	-	-	somatic_tumour	7.2	4:228864-236016	0.39	0.42	-	-	-	-	CR46065, exon_2	CG1674, intron	yellow-h, CR46065, CG1674
P25	Control-Freec	DUP	4	407664	4	419584	-	-	somatic_tumour	11.9	4:407664-419584	0.36	0.25	-	-	-	-	intergenic	intergenic	-
P25	CNV-Seq	DEL	X	3060852	X	3177592	-	-	somatic_tumour	116	X:3060852-3177592	0.85	-1.07	-	-	-	-	kirre, intron	dnc, intron	kirre, CG4116, N, CG18508, Fcp3C, CG3939, dnc
P25	Control-Freec	DEL	X	3061056	X	3201712	-	-	somatic_tumour	140.7	X:3061056-3201712	0.84	-1.03	-	-	-	-	kirre, intron	dnc, intron	kirre, CG4116, N, CG18508, Fcp3C, CG3939, dnc
P27	CNV-Seq	COMPLEX_DEL	X	3057571	X	3277390	-	-	somatic_tumour	219.8	X:3057571-3277390	0.26	-0.12	-	-		-	kirre, intron	dnc, intron	kirre, N, dnc
P27	delly	COMPLEX_BND	X	3057571	X	3277389	9	5	somatic_tumour	219.8	X:3057571-3277389	0.24	-0.12	-	-	GGTTGTTTTCTTCCTTTTGCTCCGTGAGTGTGTCATAATTTACAACAGTTGCTGGCCAAGTTGCGATTAGATTACACTTTCCATTTCCTGCAAATTGTATCAAAAATGCAGGTACACATGTCAACATCATTAGCCATATATCAACTTCACTTTCAATGCCTGCCCAATGAATTTCCTTAGCAGGCGGC	-	kirre, intron	dnc, intron	kirre, dnc
P27	lumpy	COMPLEX_BND	X	3057571	X	3277389	9	5	somatic_tumour	219.8	X:3057571-3277389	0.24	-0.12	-	-	-	-	kirre, intron	dnc, intron	kirre, dnc
P27	novobreak	COMPLEX_BND	X	3057571	X	3277389	9	5	somatic_tumour	219.8	X:3057571-3277389	0.24	-0.12	-	-	TTTTCTTCCTTTTGCTCCGTGAGTGTGTCATAATTTACAACAGTTGCTGGCCAAGTTGCGATTAGATTACACTTTCCATTTCCTGCAAATTGTATCAAAAATGCAGGTACACATGTCAACATCATTAGCCATATATCAACTTCACTTTCAATGCCTGCCCAATGAATTTCCTTAGCAGGCGGCGTGATAAAAAAAAATAAAAGGCAGGCCGATGA	-	kirre, intron	dnc, intron	kirre, dnc
P29	CNV-Seq	DEL	X	3145469	X	3148044	-	-	somatic_tumour	2.6	X:3145469-3148044	0.85	-1.59	-	-	-	-	N, intron	N, exon_2	N
P29	Control-Freec	DEL	X	3145925	X	3148700	-	-	somatic_tumour	2.8	X:3145925-3148700	0.84	-1.6	-	-	-	-	N, intron	N, intron	N
P29	lumpy	COMPLEX_BND	3R	32066206	3R	32068392	38	24	somatic_tumour	2.2	3R:32066206-32068392	0.61	0.29	-	-	-	-	Map205, intron	Map205, 5UTR	Map205
P29	novobreak	COMPLEX_BND	3R	32066206	3R	32068392	38	24	somatic_tumour	2.2	3R:32066206-32068392	0.61	0.29	-	-	CTAAATACTACTCATTTGTAATCGAATAAATTATTGATTTTAAAAAAAGTAAGCCCCAAAAGAAAGAGAGTTATAAGGAGAGTTTGGGAATGAATGAAGTCCACAGGCGCTGTAGCGTATCATGCACATTAGTGCATGCAAGCAATCGGCAAGCAATTCAAAAGTAAGAGCAACCGGAGCGAACAAAAAAGGGAATAACTTACTAAAATCTCTGAAAGAAAAATAAAAAGACTAACGGG	-	Map205, intron	Map205, 5UTR	Map205
P29	delly	DEL	X	4574313	X	4576608	8	5	somatic_tumour	2.3	X:4574313-4576608	0.61	-1.6	-	-	ATCAAGCGGCAAGCCCAACATAGTTTTTTTTTTCTCACTGTTGTCTGTAGTCTAAAAATCTTGCAACACTTTCGTTCATTCTTGTCTCCAAAGAGTGATCTCTACTTCAGAGTGGCTTTTTCTATTATCGAAGTTTATAGGGGCTATTACAT	-	CR32773, ncRNA	CR32773, ncRNA	CR32773
P29	lumpy	DEL	X	4574313	X	4576608	8	5	somatic_tumour	2.3	X:4574313-4576608	0.61	-1.6	-	-	-	-	CR32773, ncRNA	CR32773, ncRNA	CR32773
P29	novobreak	DEL	X	4574313	X	4576608	8	5	somatic_tumour	2.3	X:4574313-4576608	0.61	-1.6	-	-	ATTTTATACATTATCAAGCGGCAAGCCCAACATAGTTTTTTTTTTCTCACTGTTGTCTGTAGTCTAAAAATCTTGCAACACTTTCGTTCATTCTTGTCTCCAAAGAGTGATCTCTACTTCAGAGTGGCTTTTTCTATTATCGAAGTTTATAGGGGCTATTACATTTAAGAAAAATGTATAAAAAATAAAAAGATCATCATACTACATATGCGCTATCTCCC	-	CR32773, ncRNA	CR32773, ncRNA	CR32773
P29	Control-Freec	COMPLEX_DUP	3R	32061425	3R	32069750	-	-	somatic_tumour	8.3	3R:32061425-32069750	0.43	0.57	-	-	-	-	Map205, intron	intergenic	Map205
P29	novobreak	DEL	2L	5890205	2L	5890721	12	16	somatic_tumour	0.5	2L:5890205-5890721	0.42	0	-	-	GATGCCGAGCAACTCGGCGAGAAGGACTGTCATGAATCAAATCTTATCACAAATTTAATCGCATGGGTTCGCAGCTAAGCAAACATTTTGCGTTTTGGATGTCTACTCTGAATGGGAATCAATGTTTCGGTTGTTTTTCGTTTCCGTTTCCTGTCCTGCGTCGCAACGAATGCGATTTAATTTCCATTGTCCCATTGCCAATCAATACAAAAGTCATTTCGAAAGTATCCAGCCAGTACACTGCAGTGTGAGAGTTGGCTAAGTAGTAGACACTTAGCCGTGAAGTGTTCAGATAGCAGCCGTGGCCAGGTGTTCACTTGAACACGGCGCTCT	NHEJ	intergenic	intergenic	-
P29	novobreak	DEL	3R	14006281	3R	14008254	16	9	somatic_tumour	2	3R:14006281-14008254	0.41	-0.47	-	-	TCGCAGCATTGTGCATTGTATTGTTTTGCTTTTTTTGTTGTTTTCGATACTGCTTTTTTTTGTTTATTTTGTGTACATAAAAGAGAGAAGATCCCTGGATGACATGCACTCGGTGTTACAAGCACACATAAACCCAAAACAACCAACACTTTATCGTCAAACTCATTCGACTTGTTGTCCAATTGTGCAATAAACTAACAACGACAAATAATTGTGGAAAATGCAAATTTTTTAGGCAAAAGAGCAACAGAAAAAAATGTTGAATGCAAAGAAGTCTGGAAAACGAACGCAATATATTG	-	rdx, intron	rdx, intron	rdx
P29	lumpy	DEL	3R	14006281	3R	14008254	16	9	somatic_tumour	2	3R:14006281-14008254	0.41	-0.47	-	-	-	-	rdx, intron	rdx, intron	rdx
P29	novobreak	DEL	3R	14006281	3R	14008254	16	9	somatic_tumour	2	3R:14006281-14008254	0.41	-0.47	-	-	CAACATAAATGTCATCGGATGATAAACATACCTGGAACGACAAGAGTTAAAGGTTTACAACCGATTAATAAAGGGTCACAAGGGGGAAAGGGGAGGGGAAAAACGCGACATGTAAGGGAATATTAAACAACATAAATAACATATTGTACAATGAGACTCAACAGTTTTGCAGCCTTTGCTTGATAAAGATCGCAGCATTGTGCATTGTATTGTTTTGCTTTTTTTGTTGTTTTCGATACTGCTTTTTTTTGTTTATTTTGTGTACATAAAAGAGAGAAGATCCCTGGATGACATGCACTCGGTGTTACAAGCACACATAAACCCAAAACAACCAACACTTTATCGTCAAACTCATTCGACTTGTTGTCCAATTGTGCAATAAACTAAC	-	rdx, intron	rdx, intron	rdx
P29	lumpy	COMPLEX_BND	3R	32060908	3R	32061191	12	7	somatic_tumour	0.3	3R:32060908-32061191	0.18	0	-	-	-	-	Map205, intron	Map205, intron	Map205
P31	Control-Freec	DUP	3R	9292540	3R	9296160	-	-	somatic_tumour	3.6	3R:9292540-9296160	0.29	0.48	-	-	-	-	intergenic	CG8861, intron	CG8861
P31	Control-Freec	DUP	3R	11250055	3R	11253675	-	-	somatic_tumour	3.6	3R:11250055-11253675	0.32	0.54	-	-	-	-	CR43283, exon_3	CR43283, exon_2	CR43283
P31	novobreak	COMPLEX_TRA	Tomelloso	29478	X	3098320	12	0	somatic_tumour	3068.8	Tomelloso:29478 X:3098320	1	0	TA	-	TTGTAGGTGTAAAAGCTGATTGTTGGGCGGCCTCATCAATAATTGCATTCACACTTGCCTTGTTTTTAAAAACATAATGTGAGTTAATGTTTTAGACACCAAATGACATAAAACTATATATGTATTAAAGCACTGCT	Alt-EJ	intergenic	kirre, intron	kirre
P31	novobreak	COMPLEX_TRA	Tomelloso	44579	X	3135040	28	0	somatic_tumour	3090.5	Tomelloso:44579 X:3135040	1	0	-	-	GGTATAATCAAACGACATGCTTCGCCCGGTATAATTGTCTCATCGGCCGAATCGGCATACGACAAAATGACACAGCAAGCAAATGCAATGAAATGAAAAGGATGGCCCCAGCGGGAAAGCCGTTCAGCAAGAGCAAGGAGTGCCTGTCGCAGGGATAGCAACGAGAGAGCGACACAGAGAGCGAGAGAGAGAGAGGGAG	NHEJ	intergenic	N, 5UTR	N
P31	CNV-Seq	COMPLEX_DUP	X	3098318	X	3125700	-	-	somatic_tumour	27	X:3098318-3125700	0.92	0.86	-	-	-	-	kirre, intron	kirre, intron	kirre
P31	Control-Freec	COMPLEX_DUP	X	3098720	X	3125870	-	-	somatic_tumour	27.1	X:3098720-3125870	0.92	0.85	-	-	-	-	kirre, intron	kirre, intron	kirre
P31	lumpy	COMPLEX_BND	X	3125694	X	3126976	9	3	somatic_tumour	1.3	X:3125694-3126976	0.48	-0.13	-	CCGTGTG,TGTC	-	FoSTeS	kirre, intron	kirre, intron	kirre
P31	novobreak	COMPLEX_BND	X	3125694	X	3126976	9	3	somatic_tumour	1.3	X:3125694-3126976	0.48	-0.13	-	CCGTGTG,TGTC	TTTTTTTTCAACCGTCTCTATGACACTGCACTTGTGTGGGTGTAGGTGTGTCTGTGCCGTGTGTCCGGCAGTGTGTGGCAGGACCCCATGGGTCCTTCGGCCAAAGT	FoSTeS	kirre, intron	kirre, intron	kirre
P31	novobreak	COMPLEX_BND	X	3125694	X	3126976	9	3	somatic_tumour	1.3	X:3125694-3126976	0.48	-0.13	-	CCGTGTG,TGTC	GTGTGGGGTCTAGAGACTATCGGGGAAGTGGTTTTTACTATCCAACGAGAATCTACCGCAACTAAAAACAAAAGTTATGTGTGCACGAAAAATCATGTCCAGTCATTTCCTGTACAACTTTGGCCGAAGGACCCATGGGGTCCTGCCACACACTGCCGGACACACGGCACAGACACACCTACACCCACACAAGTGCAGTGTCATAGAGACGGTTGAAAAAAAAAAAGAAGGAAAAGGAAAAGGAA	FoSTeS	kirre, intron	kirre, intron	kirre
P31	delly	COMPLEX_BND	X	3125694	X	3126976	9	3	somatic_tumour	1.3	X:3125694-3126976	0.48	-0.13	-	CCGTGTG,TGTC	TCCTGGTTTTCCTTTTCCTTTTCCTTCTTTTTTTTTTTCAACCGTCTCTATGACACTGCACTTGTGTGGGTGTAGGTGTGTCTGTGCCGTGTGTCCGGCAGTGTGTGGCAGGACCCCATGGGTCCTTCGGCCAAAGTTGTACAG	FoSTeS	kirre, intron	kirre, intron	kirre
P31	Control-Freec	COMPLEX_DEL	X	3125870	X	3134920	-	-	somatic_tumour	9.1	X:3125870-3134920	0.77	-1.3	-	-	-	-	kirre, intron	N, 5UTR	kirre, N
P31	CNV-Seq	COMPLEX_DEL	X	3126976	X	3135039	-	-	somatic_tumour	8	X:3126976-3135039	0.81	-1.46	-	-	-	-	kirre, intron	N, 5UTR	kirre, N
P31	CNV-Seq	COMPLEX_DEL	X	17286052	X	17294628	-	-	somatic_tumour	7	X:17286052-17294628	0.73	-1.16	-	-	-	-	Fim, 3UTR	Fim, intron	CG5445, Fim
P31	delly	COMPLEX_BND	X	17286052	X	17311472	5	4	somatic_tumour	25.4	X:17286052-17311472	0.27	0.08	C	-	ATATAAAATTAGTTTCTCTGTTTTTCTCGACTTCTTTTGTTTCTGAATATTCCCCATTCTTTTTGAAGGTGTCGTAATTGCACTCAGCTCACTTGATTCCCGATAAAAGCGGAACACAGGGAATTCGGATTTCGAATGCAAACAA	Alt-EJ	Fim, 3UTR	intergenic	CG5445, Fim
P31	Control-Freec	COMPLEX_DEL	X	17286405	X	17294550	-	-	somatic_tumour	8.1	X:17286405-17294550	0.74	-1.15	-	-	-	-	Fim, 3UTR	Fim, intron	CG5445, Fim
P31	lumpy	COMPLEX_BND	X	17293197	X	17294628	10	0	somatic_tumour	1.4	X:17293197-17294628	0.41	-0.07	CT	-	-	Alt-EJ	Fim, intron	Fim, intron	CG5445, Fim
P31	novobreak	COMPLEX_BND	X	17293197	X	17294628	10	0	somatic_tumour	1.4	X:17293197-17294628	0.41	-0.07	CT	-	CTTTAATTGTATCTCAAAAATGCACGTATACGAAAAATCATCAGTTTAATCTTTTTGTGCTGAAATAAATATAATATAGAATATGTTTCCACTTTTGTGGGGTGCACGCTCGTAAAGTATCTATTGGTGGTCTTTTTTACGGCCGTGCAACGGTAAACAACTCGATAATTACTCCAAATTGCAATAATTTAACAAATATTTACCTCATAAGATGAGTTTATTGTACTTCAATTCACAAAATATATTGCACTTAATTAGCACCTGTAGTACGCCTACCATTTCATTGATTGGAACGCGTTCATTTACACATTTAAATTTGTTAAAAGCCACTTTCAAGTATCTTATTT	Alt-EJ	Fim, intron	Fim, intron	CG5445, Fim
P31	delly	COMPLEX_BND	X	17293197	X	17294628	10	0	somatic_tumour	1.4	X:17293197-17294628	0.41	-0.07	CT	-	TATTTTGTGAATTGAAGTACAATAAACTCATCTTATGAGGTAAATATTTGTTAAATTATTGCAATTTGGAGTAATTATCGAGTTGTTTACCGTTGCACGGCCGTAAAAAAGACCACCAATAGATACTTTACGAGCGTGCA	Alt-EJ	Fim, intron	Fim, intron	CG5445, Fim
P31	CNV-Seq	COMPLEX_DUP	X	17294628	X	17311472	-	-	somatic_tumour	7	X:17294628-17311472	0.84	0.7	-	-	-	-	Fim, intron	intergenic	CG5445, Fim
P31	lumpy	BND	X	17286052	X	17311472	5	4	somatic_tumour	25.4	X:17286052-17311472	0.27	0.08	-	-	-	-	Fim, 3UTR	intergenic	CG5445, Fim
P31	novobreak	BND	X	17286052	X	17311472	5	4	somatic_tumour	25.4	X:17286052-17311472	0.27	0.08	-	-	GCTTTTTAATTTGTTTGCATTCGAAATCCGAATTCCCTGTGTTCCGCTTTTATCGGGAATCAAGTGAGCTGAGTGCAATTACGACACCTTCAAAAAGAATGGGGAATATTCAGAAACAAAAGAAGTCGAGAAAAACAGAGAAACTAATTTTATATTTACTATAAATTTTTTTG	-	Fim, 3UTR	intergenic	CG5445, Fim
P33	novobreak	TRA	2L	21808001	Tomelloso	7008	3	0	somatic_tumour	21801	2L:21808001 Tomelloso:7008	0.09	0	G	-	AACTACAATCATAAATTTGCATTCCGATTAAAAAAGTTATAAGCATTTAAAACAGTGAATATGCTGTGTTACCCATGCCACCCTACGTCGATTCTCAGCAGACAAATCACTAAACTTGCCCACTTTATACGTATACTTTCGAATATCACCAG	Alt-EJ	intergenic	intergenic	-
P33	novobreak	BND	2R	5306714	2R	7159623	9	0	somatic_tumour	1852.9	2R:5306714-7159623	0.13	0	TATGTGAT	GT	GCGTTTAATTAAGCAAAAAACCCTTTATTTTTAGCTTTAAAGTCAAAAATTCAACTTATTTTACAGTGTGTAAACAGTTTCTTGACAAACTGTATGTGATTATCTGCGCACATTCGTAGTATAAAGTTTTAATTAAGTAATCTTTTGAATCAGTCTTTGTTTTTGCGTTACTCCTTTTCATTCAGATACA	Alt-EJ	intergenic	pk, intron	pk
P33	novobreak	TRA	3L	120417	3R	29280935	6	2	somatic_tumour	29160.5	3L:120417 3R:29280935	0.08	0	-	G	CTCAAAAGAGTGAAGTGGAGCAATGGAATGATAAACTCATAGCTTGTATAGCTGGCAGTGTATGCTGAGATAACAAGCCCCCGCCTTGGTTTAGAAATGAAAACAATACAACTACCATGGAAATCAAAACAACACAACTTCTGTGGCGCTTTGACCTA	NHEJ	intergenic	intergenic	-
P33	delly	DEL	3R	24856498	3R	24856996	24	7	somatic_tumour	0.5	3R:24856498-24856996	0.26	0	TC	-	ATGATATTCACTTGGCTAAAACACTTATTTTGCTTTACTTCTATAAACTGGTCGGTCATGGCCATCGGCTGCAGACCGGCCTCCTTGTTGCTTTTGTAACTGGCATTCTTGTGAACGATGTGCACCT	Alt-EJ	CG10899, exon	CG10899, exon_2	CG10899
P33	novobreak	DEL	3R	24856498	3R	24856996	24	7	somatic_tumour	0.5	3R:24856498-24856996	0.26	0	TC	-	ATACACTATGTGACTTGGACAATACATATTACATGATATTCACTTGGCTAAAACACTTATTTTGCTTTACTTCTATAAACTGGTCGGTCATGGCCATCGGCTGCAGACCGGCCTCCTTGTTGCTTTTGTAACTGGCATTCTTGTGAACGATGTGCACCTCCCCATCGTAATAGTTGCCATCCAAGCAGTGCT	Alt-EJ	CG10899, exon	CG10899, exon_2	CG10899
P33	novobreak	TRA	Tomelloso	20114	2R	24646497	3	0	somatic_tumour	24626.4	Tomelloso:20114 2R:24646497	0.1	0	AC	-	CAGTTGGCCCTCTCAGCTTTCGGATTTCTTTGTTGGCCAAGGAAGACGCGCCATGAATGCCAGACGTCAGTCGTATTAGGCCGACATCATATTTGAAATCAGCACGATTGCTTTCCTTGTTGGCTACGCGAGCACCATCCATAAATACAATAACTTCGCATGCCCGATAGCCGCGCAAAAGTTCAATATTGTCAATCAATTTTTTCATATAATCAAACCTGT	Alt-EJ	intergenic	intergenic	-
P33	CNV-Seq	DEL	X	3160180	X	3207188	-	-	somatic_tumour	46	X:3160180-3207188	0.87	-1.57	-	-	-	-	N, intron	dnc, intron	N, CG18508, Fcp3C, CG3939, dnc
P33	Control-Freec	DEL	X	3160388	X	3207446	-	-	somatic_tumour	47.1	X:3160388-3207446	0.87	-1.56	-	-	-	-	N, intron	dnc, intron	N, CG18508, Fcp3C, CG3939, dnc
P33	lumpy	BND	X	3550817	X	3551238	2	1	somatic_tumour	0.4	X:3550817-3551238	0.06	0	TTTTTTT	-	-	Alt-EJ	DIP-alpha, intron	DIP-alpha, intron	DIP-alpha
P35	Control-Freec	DUP	3R	9834685	3R	9837100	-	-	somatic_tumour	2.4	3R:9834685-9837100	0.36	0.47	-	-	-	-	Teh1, intron	Teh1, intron	Teh1
P35	lumpy	TANDUP	3R	31043462	3R	31073816	18	3	somatic_tumour	30.4	3R:31043462-31073816	0.16	0.39	T	-	-	Alt-EJ	CanA1, exon_9	Sox100B, intron	CanA1, CG33920, Alp4, mir-4948, l(3)03670, dco, Sox100B
P35	delly	TANDUP	3R	31043462	3R	31073816	18	3	somatic_tumour	30.4	3R:31043462-31073816	0.16	0.39	T	-	GCCAAGGACAGTGATGAGCTCCAAGCTGAAATATTACACTGTATTGCATTTGAAAAGCAGGGTTTCGAGGAAGGTAAGTTTGGGGATCCACAGAGCGATTCTGTCCGTACTAGACTGTGTGTCAATGTC	Alt-EJ	CanA1, exon_9	Sox100B, intron	CanA1, CG33920, Alp4, mir-4948, l(3)03670, dco, Sox100B
P35	novobreak	TANDUP	3R	31043462	3R	31073816	18	3	somatic_tumour	30.4	3R:31043462-31073816	0.16	0.39	T	-	AGATAAATATATTAGGTTCACCTGATGGACACTTGCCAAGGACAGTGATGAGCTCCAAGCTGAAATATTACACTGTATTGCATTTGAAAAGCAGGGTTTCGAGGAAGGTAAGTTTGGGGATCCACAGAGCGATTCTGTCCGTACTAGACTGTGTGTCAATGTCGCAGTGCTTTGGATGTTGTGGGGCCAATACGGATACACGTGAATTACAAACTAATCTTCTATTAAAAATATTTTCCGAAACCAAATATCGAAATACGACAACTGCAATCT	Alt-EJ	CanA1, exon_9	Sox100B, intron	CanA1, CG33920, Alp4, mir-4948, l(3)03670, dco, Sox100B
P35	novobreak	TRA	3R	31063194	X	3136742	11	9	somatic_tumour	27926.5	3R:31063194 X:3136742	0.6	0	-	-	TTTGGTTTCGTTTAGCAGTCGGCTTGAAGATTTTTGTATTTCCTTTTTTGCTCGTCGGCGGCTTAGATCAAATAATGCGATTTCATGGCAAGTTCACCAGGGGACTGGAAAAACTCGCCTTTTGCCGACGGTAAAAACGGTCTTTCTTGTTTCGAAAAGGTGGGTTTCCAAATCTGAGAGAGCATGCGCAGTCGG	-	intergenic	N, intron	N
P35	delly	TRA	X	3136742	3R	31063202	13	0	somatic_tumour	27926.5	X:3136742 3R:31063202	0.44	0	-	-	CTCTCAGATTTGGAAACCCACCTTTTCGAAACAAGAAAGACCGTTTTTACCGTCGGCAAAAGGCGAGTTTTTCCAGTCCCCTGGTGAACTTGCCATGAAATCGCATTATTTGATCTAAGCCGCCGACGAGCAAAAAAGGAAATACAAAAATC	-	N, intron	intergenic	N
P35	CNV-Seq	COMPLEX_DUP	X	1129707	X	1131480	-	-	somatic_tumour	1.7	X:1129707-1131480	0.99	0.72	-	-	-	-	CG3655, intron	CG3655, intron	CG3655
P35	lumpy	COMPLEX_BND	X	1130471	X	1131480	18	3	somatic_tumour	1	X:1130471-1131480	0.18	0.42	-	-	-	-	CG3655, intron	CG3655, intron	CG3655
P35	Control-Freec	DEL	X	12467035	X	12545925	-	-	somatic_tumour	78.9	X:12467035-12545925	0.92	-1.76	-	-	-	-	CG42258, intron	CG43921, intron	CG42258, Cpr11A, Lsp1alpha, Mks1, CG2556, snoRNA:Me18S-G894, CG43921
P35	CNV-Seq	DEL	X	12467160	X	12577262	-	-	somatic_tumour	110	X:12467160-12577262	0.92	-1.75	-	-	-	-	CG42258, intron	CG11138, intron	CG42258, Cpr11A, Lsp1alpha, Mks1, CG2556, snoRNA:Me18S-G894, CG43921, Cpr11B, CG11138
P35	Control-Freec	DEL	X	12546730	X	12577320	-	-	somatic_tumour	30.6	X:12546730-12577320	0.93	-1.76	-	-	-	-	CG43921, 5UTR	CG11138, intron	CG43921, Cpr11B, CG11138
P35	lumpy	DEL	X	13954981	X	13983925	10	1	somatic_tumour	28.9	X:13954981-13983925	0.45	0.01	-	-	-	-	mamo, intron	mamo, intron	mamo
P35	novobreak	DEL	X	13954981	X	13983925	10	1	somatic_tumour	28.9	X:13954981-13983925	0.45	0.01	-	-	GAAGTGTGCATTTTTCTCAGAACCTCTTTAAATTTAAGAGCGCGATAATTTCTACTTCAATTTTAGATCAATCGAGCTTTTTGTGTAATACCATTTACCCTATTGATTTGCTGTTCTTATTGTTATATCATTTTATATCATTGTTTCATGATGGATTACATGAAGTGCAGACTTCTCTTAAAAAAAAAACCCACTTTAATTTAAGAACAATACACTTATATAAGCTTAATAAATTATATTTGTTTCAAATCGTAGCTATATAAAAG	-	mamo, intron	mamo, intron	mamo
P37	delly	DEL	X	3671510	X	3673441	16	11	somatic_tumour	1.9	X:3671510-3673441	0.75	-0.98	-	-	GATTGGTAAACCTTTTGGAATATCGGAAAAATCAAGTGTGACCTGAATTCTTGCATACCGGTGTATATCATGTGATCCCGAATTGTTTGAAATGTTTGGGCTTAAAAGATCGAATAAAAACATCTGCAAATGGATCTAGAAG	-	intergenic	Mnt, intron	Mnt
P37	lumpy	DEL	X	3671510	X	3673441	16	11	somatic_tumour	1.9	X:3671510-3673441	0.75	-0.98	-	-	-	-	intergenic	Mnt, intron	Mnt
P37	novobreak	DEL	X	3671510	X	3673441	16	11	somatic_tumour	1.9	X:3671510-3673441	0.75	-0.98	-	-	CATCTAGGGAGTTCGCCAGATTTTCCGGCTCCTCCTCCGTTTCTATTTCGGAAATCCCGCCATCCGGCGACTTCGACATCCTGGCGCAGTTTAAGCACAAAGCCTTGCCGAGTCGATTGGTCAGCACGGATGCACTTGCTCTGCGGCGATTTGCCGTAGATTGGTAAACCTTTTGGAATATCGGAAAAATCAAGTGTGACCTGAATTCTTGCATACCGGTGTATATCATGTGATCCCGAATTGTTTGAAATGTTTGGGCTTAAAAGATCGAATAAAAACATCTGCAAATGGATCTAGAAGTTATTTATTTTGTTAAACGCCTTAATCTATAAGTATATTTA	-	intergenic	Mnt, intron	Mnt
P37	Control-Freec	DEL	3R	32014848	3R	32079331	-	-	somatic_tumour	64.5	3R:32014848-32079331	0.31	-0.64	-	-	-	-	heph, exon_1	intergenic	heph, CR45557, CG2053, krz, mod, Map205
P37	Control-Freec	COMPLEX_DEL	2L	13540608	2L	13572096	-	-	somatic_tumour	31.5	2L:13540608-13572096	0.27	-0.51	-	-	-	-	B4, intron	kuz, intron	B4, CG16852, CG9263, CG16853, kuz
P37	novobreak	COMPLEX_BND	2L	13540579	2L	13587180	7	3	somatic_tumour	46.6	2L:13540579-13587180	0.1	-0.17	-	AATTGCATGCATGGGTAAGGTTGC	GTCATAATTGTCATATTAGACAGGAAAATCCATAGACGACAGTCGACCCTGAAGTGTCGATGGACAGCAGCTTCTGGTTTTGCCCGGCCAGACAGGAAAGGAAATTGCAATTGCATGCATGGGTAAGGTTGCATGTTTTTTCTTTGTTAATTTACACATACGTGTGATATATTGCTTGTGGGTTTAACAGAAAGGCGTTGACTGTGTAAGTACTGACTGAAG	FoSTeS	B4, intron	kuz, intron	B4, kuz
P37	novobreak	BND	2L	9190416	2L	13552614	7	0	somatic_tumour	4362.2	2L:9190416-13552614	0.09	0.01	-	-	AACAAAAGGGGACTTACAAAATTTTAAAACTATATACTTCGGTATGAAACACACAGTAGGAATGAAACATTTAGCTTATACATCTACATATATAATATTACATAATTAAATTATGTAATCCATGTAAGTGTGTGTGTGTGTGTATGCGTAGTTTACATACATATACATATGCATATGCATGTACTTCGTATGGCAACAGAAAATGTTGTTGAT	NHEJ	tai, intron	kuz, intron	tai, kuz
P37	novobreak	BND	2R	16371025	2R	17742832	6	0	somatic_tumour	1371.8	2R:16371025-17742832	0.07	0.01	GT	-	GGTTAAATATGCCCACTTAATTGAGTTTAATTGTGTGTGCGCTAAGCAGGCGGAAATATTTTACTACACAAACTAACCACATTTATATGCAGAACATACAAAGCTTCGCCATGTGTCTGGAGGAAATTGCCAAGGAGG	Alt-EJ	intergenic	Vps54L, intron	Vps54L
P37	novobreak	BND	2L	3314020	2L	14210317	2	1	somatic_tumour	10896.3	2L:3314020-14210317	0.02	0	GGATG	-	CTGCTGCTGACCATTGACCACCACCTCGACATCATCGATTCCAAGTCGCTGCTTAATCATAGTGGAGCAGCACCAAAATCCAGTCCATCCCATCCGGACAACGACTGTTGTTCACCGCGCTTACAAGGACATTGTACGAAGTGCCTAAAAG	Alt-EJ	CG3277, exon_4	Dyrk2, intron	CG3277, Dyrk2
P39	lumpy	DEL	2L	4113213	2L	4118212	6	4	somatic_tumour	5	2L:4113213-4118212	0.31	-0.55	-	-	-	NHEJ	ed, intron	intergenic	ed
P39	Control-Freec	DEL	3R	4137600	3R	4173600	-	-	somatic_tumour	36	3R:4137600-4173600	0.31	-0.54	-	-	-	-	Gfat1, exon	intergenic	Gfat1, CR41601, CG40198
P39	lumpy	DEL	3R	8812327	3R	8815424	3	5	somatic_tumour	3.1	3R:8812327-8815424	0.26	-0.49	-	-	-	-	CG9837, intron	CG9821, 3UTR	CG9837, CG9821
P39	novobreak	DEL	3R	8812327	3R	8815424	3	5	somatic_tumour	3.1	3R:8812327-8815424	0.26	-0.49	-	-	TACTCTGCGTGCTTTTCGTCACTACGTAAACACCGTCCTCAGTTATACATACATACATATGTTCATGTATATGTATTTCTCGGGGGTGGCCTGAAAAATCTAAGCTGTTCTCCGCTTAAACTGACGTCCAGTAAGTAACAAACGTTTTGCTTAC	-	CG9837, intron	CG9821, 3UTR	CG9837, CG9821
P39	Control-Freec	DEL	X	3120000	X	3194400	-	-	somatic_tumour	74.4	X:3120000-3194400	0.77	-0.98	-	-	-	-	kirre, intron	dnc, intron	kirre, N, CG18508, Fcp3C, CG3939, dnc
P39	CNV-Seq	DEL	X	3120718	X	3194680	-	-	somatic_tumour	73	X:3120718-3194680	0.77	-0.99	-	-	-	-	kirre, intron	dnc, intron	kirre, N, CG18508, Fcp3C, CG3939, dnc
P41	Control-Freec	DUP	2R	14139624	2R	14146728	-	-	somatic_tumour	7.1	2R:14139624-14146728	0.4	0.59	-	-	-	-	Prosap, intron	intergenic	Prosap, mir-989
P41	Control-Freec	DUP	2R	21765768	2R	21770208	-	-	somatic_tumour	4.4	2R:21765768-21770208	0.4	0.64	-	-	-	-	CG30395, exon_2	intergenic	CG30395
P41	delly	DEL	3L	14059217	3L	14059363	15	0	somatic_tumour	0.1	3L:14059217-14059363	0.21	0	-	AAATCT	GCTTCCATTATTTGTCGGCAAAACGAAAAAGATAGTGAATACCATCTGCATATTACTCACCTCAAATCTTCGAAGCTTACTCATTTGGCATGAGCGTAGACAGATTGAAATTGAATGGGGGTTGCCAGGCTTACAG	FoSTeS	Frl, intron	Frl, intron	Frl
P41	lumpy	DEL	3L	14059217	3L	14059363	15	0	somatic_tumour	0.1	3L:14059217-14059363	0.21	0	-	AAATCT	-	FoSTeS	Frl, intron	Frl, intron	Frl
P41	novobreak	DEL	3L	14059217	3L	14059363	15	0	somatic_tumour	0.1	3L:14059217-14059363	0.21	0	-	AAATCT	CTTTATTGATTGTGTTCATGATTCGCATGAAAATCAATTTATGTAGCCCATGTGGCTTTTCCAATAAAATTCCAATAAAATGTACTTTTGCTTCCATTATTTGTCGGCAAAACGAAAAAGATAGTGAATACCATCTGCATATTACTCACCTCAAATCTTCGAAGCTTACTCATTTGGCATGAGCGTAGACAGATTGAAATTGAATGGGGGTTGCCAGGCTTACAGTCCGTAGCGCGTCCCATTATGCACATGCACACACATGTACATATAGATAGAGGGGACACAAAAATAAAACAAATTTAAAATGCGTATCCGGTATGCCGGTCAAGTAATTCATTATGTACACCGATATTTACATTTACATACATATGTATGTACATATGTACAT	FoSTeS	Frl, intron	Frl, intron	Frl
P41	Control-Freec	DUP	3R	6894432	3R	6897984	-	-	somatic_tumour	3.6	3R:6894432-6897984	0.39	0.69	-	-	-	-	intergenic	Antp, 3UTR	CR44932, Antp
P41	Control-Freec	DUP	3R	10581408	3R	10584072	-	-	somatic_tumour	2.7	3R:10581408-10584072	0.41	0.79	-	-	-	-	hth, 3UTR	hth, 3UTR	hth
P41	lumpy	DEL	3R	18794445	3R	20261187	23	4	somatic_tumour	1466.7	3R:18794445-20261187	0.22	0.05	-	ACGTAAGT	-	FoSTeS	CG7720, intron	cic, intron	CG7720, cic
P41	novobreak	DEL	3R	18794445	3R	20261187	23	4	somatic_tumour	1466.7	3R:18794445-20261187	0.22	0.05	-	ACGTAAGT	CATAATCAAATATGAATATATGTATTTGTTGTAAAATATCCCCCTGGTCGAAATCTGTTTTCAATTAGTCAGAGTGAGGCGTTTTCGAGAGAACCTGTTCGTTCCACTGGCAGCTGACTACGAGTATTTAGCGCTTTATGTGGCATATTTGAAAAGTTTGTCTAAAAACCGTTTAGATTATATTTTGGTAGCTCGTTTGCATTGCTAATGAGCGAGCCCAGGGGTCCAGTCCAGAATTAATGGCCCCGACCATGTGAAAACTTCGTAAATACAATATTTGGCGTTTCGTATTAATTTATCAAAATCCGAAAACTACAGGCCATAAAAAGCACACATCAAATCGGCCGTTTACGTAAGTATATATGGTTATGTATGGTCATATAATATATCTGCTAGCGG…	FoSTeS	CG7720, intron	cic, intron	CG7720, cic
P41	Control-Freec	DUP	4	542568	4	545232	-	-	somatic_tumour	2.7	4:542568-545232	0.45	0.63	-	-	-	-	Thd1, 3UTR	Thd1, 3UTR	Thd1
P41	Control-Freec	DEL	X	3033408	X	3135528	-	-	somatic_tumour	102.1	X:3033408-3135528	0.88	-1.63	-	-	-	-	kirre, intron	N, 5UTR	kirre, CG4116, N
P41	lumpy	DEL	X	3033491	X	3135340	16	13	somatic_tumour	101.8	X:3033491-3135340	0.78	-1.63	-	ACACTCC	-	FoSTeS	kirre, intron	N, 5UTR	kirre, CG4116, N
P41	novobreak	DEL	X	3033491	X	3135340	16	13	somatic_tumour	101.8	X:3033491-3135340	0.78	-1.63	-	ACACTCC	TTCCTACCCGAATATCTCTCGTATTTTCTCCACGCCCCACCATTCTCCTTGCCAATTCAACAAAAAACTGTCAACGCTGCTGTCGTCTGACTTTGTTTTCTCATTAGACAGTTGCCCTCGTGTTGTTTTTCCACTCGGAGCGCATTTCATAATTGTCAGCCCGCCCAGAAAAGCCGTCCAATAAAAGTCCAGATCTAGATTCAGATTCGGTTCCGGTACACTCCGATACACGAAAAGCGTTCTTTTTTTGCCACTTTTTTTTTATGTTTCAAAACGGAAAATGTCGCCGTCGTCGGGAGAGTGCCTCCTCTTAGTTTATCA	FoSTeS	kirre, intron	N, 5UTR	kirre, CG4116, N
P41	delly	DEL	X	3033491	X	3135340	16	13	somatic_tumour	101.8	X:3033491-3135340	0.78	-1.63	-	ACACTCC	TTTCATAATTGTCAGCCCGCCCAGAAAAGCCGTCCAATAAAAGTCCAGATCTAGATTCAGATTCGGTTCCGGTACACTCCGATACACGAAAAGCGTTCTTTTTTTGCCACTTTTTTTTTATGTTTCAAAACGGAAAATGTC	FoSTeS	kirre, intron	N, 5UTR	kirre, CG4116, N
P43	novobreak	BND	2L	5318061	2L	5318184	4	0	somatic_tumour	0.1	2L:5318061-5318184	0.04	0	GCTGCGGCTGC	-	TGACGAGAAGATCGGCACCCGGAGAAGCGTGCGGGCCAGTGCGGCGGCCAACAAGATCATCTATAGTCGCAGCAATGCAGCCGCAGCGGTGGCTCCACGTGTTGCATGAACCACACTTGTGCCGCTGTTAACTTGGCTGGTGGTCACCACAGCTCCGCCTGGCATTGTTGTCGTCGTCACTGAGGAGGGCACAACACTGGCATTGTTGGCAGTGCTGCTGTTG	Alt-EJ	Ncoa6, exon_5	Ncoa6, exon_5	Ncoa6
P43	novobreak	DEL	3R	13698357	3R	23758748	13	0	somatic_tumour	10060.4	3R:13698357-23758748	0.07	-0.01	-	-	GATCCGGACGATGAGCTGGAACTGGACGATTCCGAACCTCCAACCCGCGCTTAGCTTCCACCATGCTCCTCCAGTCGACACCTGTTATTTCAGGCTGCCATGTTCGCACGCGTGTCCTTCTACCCCACCCTGCTGTACAATGTCCTGATGGAAAAGGCATCGGC	-	f-cup, exon_1	PTPMT1, 5UTR	f-cup, PTPMT1
P43	Control-Freec	DEL	4	688224	4	690636	-	-	somatic_tumour	2.4	4:688224-690636	0.32	-0.56	-	-	-	-	CG11360, 3UTR	CG11360, 3UTR	CG11360
P43	CNV-Seq	COMPLEX_DEL	X	3157127	X	3158876	-	-	somatic_tumour	1.8	X:3157127-3158876	0.91	-2.14	-	-	-	-	N, intron	N, intron	N
P43	delly	COMPLEX_BND	X	3159064	X	3390026	19	19	somatic_tumour	231	X:3159064-3390026	0.7	-0.01	-	-	CCTTTCCCGTGTAGCCCGTGGGACACATGCACCTAGAACAGAAGCGAGAGGAGCAATTAAACGCGGGTTAAACGCGGCTGTTAATTGTTTGGATATATTTTTTAAGCATCACATAAAGTTTTCTGTTGGGT	-	N, intron	CG12535, 3UTR	N, Myc, CR44999, CG12535
P43	lumpy	COMPLEX_BND	X	3159064	X	3390026	19	19	somatic_tumour	231	X:3159064-3390026	0.7	-0.01	-	-	-	-	N, intron	CG12535, 3UTR	N, Myc, CR44999, CG12535
P43	novobreak	COMPLEX_BND	X	3159064	X	3390026	19	19	somatic_tumour	231	X:3159064-3390026	0.7	-0.01	-	-	GTGTGTGTGTGTGTGTGTGAATTTGCCGGCTACTTCTGCCATTCGTGTACCCTTTCTATTTAACGCGGTATCCCCACTGTCATAATAAACTGCAAATTAAGTTTAATTCATCTGTTTTAGCTCTCCATTTTAAACTTTTAAACTTAAACGACCCAACAGAAAACTTTATGTGATGCTTAAAAAATATATCCAAACAATTAACAGCCGCGTTTAACCCGCGTTTAATTGCTCCTCTCGCTTCTGTTCTAGGTGCATGTGTCCCACGGGCTACACGGGAAAGGATTGCGACACCAAGTACAAGCCCTGCTCGCCATCGCCGTGCCAGAATGGCGGAATTTGCCGGTCGAACGGTCTGTCCTACGAGTGCAAGTGCCCCAAAGGTGAGTGCTAGTTATTAAG…	-	N, intron	CG12535, 3UTR	N, Myc, CR44999, CG12535
P43	CNV-Seq	COMPLEX_DUP	X	3392440	X	3393763	-	-	somatic_tumour	1.3	X:3392440-3393763	0.89	0.61	-	-	-	-	CG12535, 3UTR	CG12535, intron	CR44999, CG12535
P45a	Control-Freec	DUP	X	13949502	X	14039628	-	-	somatic_tumour	90.1	X:13949502-14039628	0.8	0.61	-	-	-	-	mamo, intron	intergenic	mamo, CG11068, CR44655, ben, Ste12DOR, tRNA:Arg-TCG-2-1, tRNA:Ser-CGA-1-1, tRNA:Ser-CGA-1-2, tRNA:Arg-TCG-3-1, tRNA:Arg-TCG-3-2, tRNA:Arg-TCG-3-3, tRNA:Arg-TCG-3-4, tRNA:Ser-AGA-3-1, tRNA:Ser-AGA-2-1
P45a	CNV-Seq	COMPLEX_DEL	X	3005994	X	3239110	-	-	somatic_tumour	232	X:3005994-3239110	0.74	-0.64	-	-	-	-	kirre, intron	dnc, intron	kirre, CG4116, N, CG18508, Fcp3C, CG3939, CG14265, dnc
P45a	Control-Freec	DUP	3L	22785188	3L	22796871	-	-	somatic_tumour	11.7	3L:22785188-22796871	0.48	0.92	-	-	-	-	SPoCk, 3UTR	jim, 3UTR	SPoCk, CG14448, jim
P45a	Control-Freec	DUP	3R	25869500	3R	25874507	-	-	somatic_tumour	5	3R:25869500-25874507	0.48	1.32	-	-	-	-	CG5890, intron	Tsp96F, 3UTR	CG5890, Tsp96F
P45a	Control-Freec	DUP	3R	21309792	3R	21316468	-	-	somatic_tumour	6.7	3R:21309792-21316468	0.47	1.25	-	-	-	-	Hsromega, exon_2	Hsromega, ncRNA	Hsromega
P45a	Control-Freec	DUP	4	721008	4	746043	-	-	somatic_tumour	25	4:721008-746043	0.43	0.16	-	-	-	-	ey, 3UTR	bt, exon_23	ey, bt
P45a	delly	BND	X	17074351	X	17132365	5	4	somatic_tumour	58	X:17074351-17132365	0.24	-0.19	-	-	ATTAAAATCCTTGTTTGTTGTCCATCGTAAATTTTGGGATCATCCATAAAATTCCAAAACATTAGTAAGAGATTCATCTGAAAGCTCTGAACAGCAAAATAAATAAAACCAAAGC	-	wcy, intron	CG5004, intron	wcy, CG5004
P45a	lumpy	BND	X	17074351	X	17132365	5	4	somatic_tumour	58	X:17074351-17132365	0.24	-0.19	-	-	-	-	wcy, intron	CG5004, intron	wcy, CG5004
P45a	novobreak	COMPLEX_BND	X	3006006	X	3322256	5	3	somatic_tumour	316.2	X:3006006-3322256	0.21	-0.44	-	-	CTGACAGGGGAAGAGGGCCCTCCAAAGAGCCAGCTAAATTCGAAACGCACACAGAGGCGAAAAGTGCAACAACTTTGCTGGCATTTTAGGCTCCTACATATTTTTGAAAATAATCCTTTCTTACTGCCCGACTAGCTGAAATATGAAATATTGAATAGAAAAGGTACAAGT	-	kirre, intron	CR44886, ncRNA	kirre, CG4116, N, CG18508, Fcp3C, CG3939, CG14265, ng2, ng3, ng1, ng4, Pig1, Sgs4, CG10793, dnc, CR44886
P45a	novobreak	DEL	2R	11716582	2R	11717073	5	0	somatic_tumour	0.5	2R:11716582-11717073	0.06	0	-	-	AAACTTTCTTTTTATAAATATTTGCTAAGGCTTGAGCCTTCTTCGCAGTGGTAGATTCTCAAAAACTTTAAATTTAAATATATAAATATTATTTCCTGAATCGAGTACATTTTTTCTCAGTGCATCCATTGAATTTGTCTAGGGCTGTGAGCGGGCTACTCAAATATGACACC	-	pyr, intron	pyr, intron	pyr
P45a	novobreak	TANDUP	3R	25463643	3R	25485200	3	2	somatic_tumour	21.6	3R:25463643-25485200	0.06	0.14	-	-	GATACTGACCGCCACCGGGCGAAGAAAACTTAAGATGCGAGTGCCCAGCGGCGGTCCAGAAATGGCTTGGCTGTACAAAAGACAAAAGACAGCAGCCACGAAAATCAATTTGTGTTGCCTTCCCTTGTTTTTTTTTTTTAAATTTGGTGTACGTG	-	Fur1, intron	CG5116, exon	Fur1, CG42488, CG5116
P47	lumpy	BND	2R	7381817	2R	7382003	1	3	somatic_tumour	0.2	2R:7381817-7382003	0.11	0	-	-	-	-	Dscam1, exon_1	intergenic	Dscam1
P47	lumpy	BND	3L	5322843	3L	5323023	2	1	somatic_tumour	0.2	3L:5322843-5323023	0.09	0	-	-	-	-	intergenic	intergenic	-
P47	Control-Freec	DUP	4	131794	4	138918	-	-	somatic_tumour	7.1	4:131794-138918	0.35	0.45	-	-	-	-	intergenic	CG32000, intron	CR43956, CG32000
P47	Control-Freec	DUP	4	443469	4	454155	-	-	somatic_tumour	10.7	4:443469-454155	0.24	0.26	-	-	-	-	lgs, 5UTR	intergenic	lgs
P47	novobreak	BND	X	1219691	X	1219821	4	0	somatic_tumour	0.1	X:1219691-1219821	0.21	0	-	-	GTATCTACTGGCAGCGGAGGAGTTACTGGCGGAGGAGCCGCCATCAGCAACCAGAGCGATCTGTACTCGGTGACGGAGTTGTAGGAGTGCGCCTGCTGTTGCTGCTGCTGCTGTTCCAGCATTAGCTGTTGCTGCTGCTTCGATGAGAAGTTGTTGTTGTGCTGCCTTTGATAAAAGGCCTGCTGCTGCTGCTGCTGATGGTAGCTGCTGTCATAGG	-	CG3638, 3UTR	CG3638, exon	CG3638
P47	lumpy	BND	X	16439367	X	16439415	4	0	somatic_tumour	0	X:16439367-16439415	0.15	0	-	-	-	-	CG9947, intron	CG9947, intron	CG9947
P49	lumpy	DEL	3R	28657288	3R	31057415	11	15	somatic_tumour	2400.1	3R:28657288-31057415	0.21	0.01	-	AGGTTGCCCTTTTTTTTT	-	FoSTeS	intergenic	dco, exon	dco
P49	novobreak	DEL	3R	28657288	3R	31057415	11	15	somatic_tumour	2400.1	3R:28657288-31057415	0.21	0.01	-	AGGTTGCCCTTTTTTTTT	AATCTCGGCAAAATACTGCAGACTGTTTAAAAATTACAAACTCCGATCACGTTCTGCAGCGCAGAAAGTTTCGACTTCCTATAAACACTTGAGATGCAGGTTGCCCTTTTTTTTTTACACCAGGTTGCCCTTTTTGCCAAGACCCATGAGGAAGTTATCCGGCTTGATGTCGCGATGGATGAAGTCCCGCGAGTGTATGTAATCG	FoSTeS	intergenic	dco, exon	dco
P49	Control-Freec	DEL	X	2982420	X	3191076	-	-	somatic_tumour	208.7	X:2982420-3191076	0.85	-1.65	-	-	-	-	kirre, intron	dnc, intron	kirre, CG4116, N, CG18508, Fcp3C, CG3939, dnc
P49	novobreak	DEL	X	2982553	X	3192604	3	2	somatic_tumour	210.1	X:2982553-3192604	0.24	-1.64	-	-	TTTCCAACTTGCCTGTTGAGTAATTCTACGAAAGATCGTCTCCGTCTGGGAATTGGGTTTCCCTGCTAAATTTTTTTGCTTTCCCTAACAAAAAAAAAAAATAAACAAACCCGTGAGTAGTTGGCTTCAAAAGGTATGCACCTTTTTACGGGAACTTACGCTAAATAT	NHEJ	kirre, intron	dnc, intron	kirre, CG4116, N, CG18508, Fcp3C, CG3939, dnc
P51	Control-Freec	DUP	2R	9886142	2R	9907779	-	-	somatic_tumour	21.6	2R:9886142-9907779	0.28	0.3	-	-	-	-	CG1513, intron	FMRFa, intron	CG1513, FMRFa
P51	novobreak	BND	2R	15960557	2R	17016068	3	0	somatic_tumour	1055.5	2R:15960557-17016068	0.03	-0.01	-	-	CTATAAAGCAACTTTAAAGCACTCATGTATTTGTTTTAAAAACATCACAAACAGCAGCAATAGATCAACACAACGGTCGCGAGAGGAACAGCGGAGGACGCTCATCCTTCTCAGCTCCGACGGCCACATCGACGTTGACATTGGATTCGATGCGAC	NHEJ	Strn-Mlck, exon_5	intergenic	Strn-Mlck
P51	Control-Freec	DEL	3R	5137804	3R	5157474	-	-	somatic_tumour	19.7	3R:5137804-5157474	0.27	-0.41	-	-	-	-	CG12589, exon_1	dpr16, intron	CG12589, dpr16
P51	novobreak	TRA	Tomelloso	57648	3R	29824046	3	0	somatic_tumour	29766.4	Tomelloso:57648 3R:29824046	0.12	0	-	-	GTGTACGCCAAGGGATCGCCCAAGTCCTGCTCGGTGGACGTGAAGAGCGCGCTGGACTTCGGGCTGCAAGGAATTGATTGTGCGATGCCATCATTTTGACGAAGACACCCCATACATTGAGAATAATAT	-	intergenic	neo, exon_6	neo
P53	novobreak	BND	2L	16655322	2L	16655452	5	0	somatic_tumour	0.1	2L:16655322-16655452	0.05	0	TGCCCGCTGC	-	TGTCCAAGCTGGAATCCGAATTTCAGTGCAAGGCGGATGAAGTGGTTGCCCGCTGCTGGCAGCATTGTTGCTCAAAGACTCCGAATTGAACTCCACTTGAGCTGAACCTGGCTATCACAATTTTACATAACCCGCCAATCCC	Alt-EJ	CG42389, intron	CG42389, intron	CG42389
P53	delly	DEL	3L	20444578	3L	20445608	17	21	somatic_tumour	1	3L:20444578-20445608	0.46	-0.56	A	CT	AGCTTATTCAACACTTCTTCTGGCTACAATAAAATACCTATACGAGATTAGGTGAAATCTACCTAATGTTGTTCAAAATTTAATTAATGTTAGTCCAAAAAGGCACAATCCATCTTCCAAGTGATAACCAATTA	Alt-EJ	CG5910, intron	CG5910, intron	CG5910
P53	lumpy	DEL	3L	20444578	3L	20445608	17	21	somatic_tumour	1	3L:20444578-20445608	0.46	-0.56	A	CT	-	Alt-EJ	CG5910, intron	CG5910, intron	CG5910
P53	Control-Freec	DUP	3R	29556129	3R	29558982	-	-	somatic_tumour	2.9	3R:29556129-29558982	0.31	0.49	-	-	-	-	intergenic	Dr, intron	Dr
P53	Control-Freec	DEL	X	3139251	X	3200115	-	-	somatic_tumour	60.9	X:3139251-3200115	0.9	-2.07	-	-	-	-	N, intron	dnc, intron	N, CG18508, Fcp3C, CG3939, dnc
P53	CNV-Seq	DEL	X	3139518	X	3200151	-	-	somatic_tumour	60	X:3139518-3200151	0.9	-2.08	-	-	-	-	N, intron	dnc, intron	N, CG18508, Fcp3C, CG3939, dnc
P55	novobreak	BND	2L	2692449	2L	15146570	3	0	somatic_tumour	12454.1	2L:2692449-15146570	0.03	-0.01	-	-	GCCCATCATCCTGTGGGTGTCCACACCAAGGACATGGCCAAGCTGCAGGATAAAGGAGGAGCACGCACAATATCTGATTGTTGCTATCAAAATTTGAGTTGGGTTTGACGCTTCGGTGGCCCAGCTGCTGATGTTTTTGGGGCTGCAT	NHEJ	CG31690, intron	intergenic	CG31690
P55	Control-Freec	DUP	3R	12903870	3R	12908385	-	-	somatic_tumour	4.5	3R:12903870-12908385	0.46	0.41	-	-	-	-	intergenic	intergenic	-
P55	lumpy	DEL	X	3161667	X	3165215	12	28	somatic_tumour	3.5	X:3161667-3165215	0.92	-2.6	-	-	-	NHEJ	N, intron	N, exon_6	N
P57	Control-Freec	DEL	3L	0	3L	286520	-	-	somatic_tumour	286.5	3L:0-286520	0.24	-0.43	-	-	-	-	intergenic	RhoGEF3, intron	mthl8, CG43149, Lsp1gamma, CR44510, CR44511, CR43150, CR43988, CG13405, CG12483, CR45401, CR45402, CR45400, Pdk1, CR45805, CG6845, Dic61B, p130CAS, CR43151, CG7049, CR45806, Vdup1, CG13875, CG34140, Mkp, Mtch, rno, mri, Gk1, NitFhit, CG13876, CG7028, thoc7, CG16940, Kaz1-ORFB, Kaz1-ORFA, pyx, CG13877, CG33229, CR42862, CG42846, CG34454, CG34453, E(bx), mthl14, DIP2, wac, Tudor-SN, snoRNA:Tudor-SN…
P57	novobreak	BND	3L	284238	3L	286090	5	1	somatic_tumour	1.9	3L:284238-286090	0.06	-0.15	-	-	TCATAATGATCAGACTCATAATTATCGAATGGTAGGCTGCATGCAATTTATAGTAAATTAATGCAATTGCGAGTTTCCAGCCAACTTTTTATTTTATAAAAAACATTGACAGCTTTTCGAAATATCTGCCCCAACGAGAACACCGAAGACGCCCAAGTTTTACCAAAATTTGAGTTGCGATTGAGTTAGTGCT	-	RhoGEF3, intron	RhoGEF3, intron	RhoGEF3
P57	Control-Freec	DEL	3L	326040	3L	532285	-	-	somatic_tumour	206.2	3L:326040-532285	0.24	-0.46	-	-	-	-	Atac3, exon_6	klar, intron	Atac3, Ptpmeg, mthl9, mthl10, mth, CG1231, Cdc5, Roc1b, CG1233, CG13884, trh, CR45378, CR43969, CG13891, snmRNA:438, CG34267, CG34268, CR46002, CR45118, CR45117, CG34269, klar
P57	delly	DEL	3L	326321	3L	532735	11	18	somatic_tumour	206.4	3L:326321-532735	0.32	-0.46	TTT	-	GTGTTCAGCATTTCTTTCGAGTCCTCGTCATCGTTGTCCTGCACCATGTCTGCGATTTCGTGCGTCTTTCAGTTGGGTTGGGCCTTGCAACCGGACTCATGGGGAGAGTTATGCCCGCCTTGGGTTACTTGGGAAA	Alt-EJ	Atac3, exon_6	klar, intron	Atac3, Ptpmeg, mthl9, mthl10, mth, CG1231, Cdc5, Roc1b, CG1233, CG13884, trh, CR45378, CR43969, CG13891, snmRNA:438, CG34267, CG34268, CR46002, CR45118, CR45117, CG34269, klar
P57	lumpy	DEL	3L	326321	3L	532735	11	18	somatic_tumour	206.4	3L:326321-532735	0.32	-0.46	TTT	-	-	Alt-EJ	Atac3, exon_6	klar, intron	Atac3, Ptpmeg, mthl9, mthl10, mth, CG1231, Cdc5, Roc1b, CG1233, CG13884, trh, CR45378, CR43969, CG13891, snmRNA:438, CG34267, CG34268, CR46002, CR45118, CR45117, CG34269, klar
P57	novobreak	DEL	3L	326321	3L	532735	11	18	somatic_tumour	206.4	3L:326321-532735	0.32	-0.46	TTT	-	ATTCTGCAACGCAGTGTTCAGCATTTCTTTCGAGTCCTCGTCATCGTTGTCCTGCACCATGTCTGCGATTTCGTGCGTCTTTCAGTTGGGTTGGGCCTTGCAACCGGACTCATGGGGAGAGTTATGCCCGCCTTGGGTTACTTGGGAAAATTATGAGCAAACATTTTGATAAAGTCCA	Alt-EJ	Atac3, exon_6	klar, intron	Atac3, Ptpmeg, mthl9, mthl10, mth, CG1231, Cdc5, Roc1b, CG1233, CG13884, trh, CR45378, CR43969, CG13891, snmRNA:438, CG34267, CG34268, CR46002, CR45118, CR45117, CG34269, klar
P57	CNV-Seq	DEL	X	3134274	X	3140118	-	-	somatic_tumour	5.8	X:3134274-3140118	0.86	-1.85	-	-	-	-	kirre, 3UTR	N, intron	kirre, N
P57	Control-Freec	DEL	X	3134430	X	3140605	-	-	somatic_tumour	6.2	X:3134430-3140605	0.85	-1.75	-	-	-	-	kirre, 3UTR	N, intron	kirre, N
P59	lumpy	BND	X	3084863	X	3143771	5	3	somatic_tumour	58.9	X:3084863-3143771	0.2	0.41	-	-	-	-	kirre, intron	N, intron	kirre, N
P59	novobreak	BND	X	3084863	X	3143771	5	3	somatic_tumour	58.9	X:3084863-3143771	0.2	0.41	-	-	AAGGTAAACTCTTCTTTAGTTGCAAGTTGTATACTTTTTTGTGTTATATTTAAGTGCAAGCTATCGAGAGGAGGAGTTCATTGACCCATAATCCTAGTTTTTTTTTTTTGTTGCTAAATTGAAAAGCATAGAGAAGGCAACGTAATGACCGCTGATGATGAGGTGTTTATGACCGCGGCCAGGTATCTCGAATATTTTGCATTAGTCACGCTTATTGTCTTCAGCCGAAACGGGGGCGTTTCTTGGCATTCGGTTATGGGTTATATGTGTATATAACTATAGGGCTTTATAGGTCGCGGATCGGCATTGCCCCTTTGTCTTTGCGCCGCATTTCCCGCCGTTTCGAACTCGGCGGCAGTCATTAGACACACAGCGAAACCGCTACAAAATCGAACCGCA…	-	kirre, intron	N, intron	kirre, N
P59	delly	BND	X	3084863	X	3143771	5	3	somatic_tumour	58.9	X:3084863-3143771	0.2	0.41	-	-	TCGAGATACCTGGCCGCGGTCATAAACACCTCATCATCAGCGGTCATTACGTTGCCTTCTCTATGCTTTTCAATTTAGCAACAAAAAAAAAAAACTAGGATTATGGG	-	kirre, intron	N, intron	kirre, N
P59	novobreak	BND	X	3138400	X	3196544	4	3	somatic_tumour	58.1	X:3138400-3196544	0.2	0.14	-	-	TTTTTATTTCCATTAAATTTGGTTGCAACTTTATGTGGATGATCCATTCCGACCATAAAGTGCACACTTTACGATCCATATTATGTACATATTTATACTCGGTACTGTAAGCATACCTTTTTGTGAGCTTCAACTTATTAAACTTTTTAATTTCCATTTAAAC	-	N, intron	dnc, intron	N, dnc
P59	novobreak	TRA	2R	5344709	3L	4352897	7	1	somatic_tumour	991.8	2R:5344709 3L:4352897	0.11	0	-	-	GGAGATCAGGGTCCGCAGAATCGATTTTAATGCAACTTCCTGCGGTTCAATGACTTCGCCCCTGCAACATGTTGCGGCAACACTTTCAGTGCACGAAGTAAAAATAAAGGATGATCAATCAGTCAAACAGCGGTATTACATGAAGAACCCGAAGTACAGGTAG	-	intergenic	Cip4, intron	Cip4
P59	novobreak	TRA	3L	1862077	3R	9427693	3	0	somatic_tumour	7565.6	3L:1862077 3R:9427693	0.07	0	-	-	AATGCACCCGCATGTCGGGCGGCAGGGCAACTCTGGGCGGAGTTTTACCTATGCTTTTCACTCGCCGATAGATACAAAACTGCTGTCAGCGGATTTGTGTTGAGCCTATGAAAAGACGATAAA	-	Rap1, exon_1	ps, intron	Rap1, ps
P59	novobreak	TRA	3L	12126856	2L	10898536	3	0	somatic_tumour	1228.3	3L:12126856 2L:10898536	0.05	0	-	-	GAGAAACGCAATGGGTAGCCGCGCAAGTCTTTCATCTTTCTTGGGTACGATGTCGCTGGGAATGAGACGATAATGGTCCCACAAGAATTGCGCCTCGTACG	-	Ir68b, exon	intergenic	Ir68b
P59	novobreak	BND	3L	15052420	3L	22264473	3	0	somatic_tumour	7212.1	3L:15052420-22264473	0.03	0.07	-	-	ATTCCTAATTGTCGTTGCTCTTGTGGCCTTTTTGGCTGTTGGTCTTGTGGCAGAGAATTGGCCGAGCAAACCTACAACCAGATCGAGAAGTTTAAATACCACCTGAGCAACCCAGAGGTTCGCTCCCTGCTGCTTATCGGTGGAGTGA	-	CG13461, exon	Ddx1, exon_3	Sytbeta, CG13461, Ddx1
P59	novobreak	TANDUP	3R	14619449	3R	14625583	2	1	somatic_tumour	6.1	3R:14619449-14625583	0.03	0.22	-	-	ATTTTAAGCTAGAGGGGCACAGTTGAAAAAGTATATGCGCGCTGCACTTTTTCGTTTCTTATTATCTTCATTATCATTATGTTCGTCGTAATGATGTTTCAGCACCAATGGAAAATATAC	-	put, 3UTR	put, 5UTR	put
P61	Control-Freec	DUP	3L	13503368	3L	13510140	-	-	somatic_tumour	6.8	3L:13503368-13510140	0.47	0.83	-	-	-	-	Spt20, exon_1	Spt20, 3UTR	Spt20
P61	Control-Freec	DEL	3L	22953694	3L	23348163	-	-	somatic_tumour	394.5	3L:22953694-23348163	0.19	-0.4	-	-	-	-	intergenic	intergenic	CG32461, CR45758, CG32457, nrm, RpL10, CkIIalpha, CG33217, CR41454, Vps11, CR45164, CG34031, CR43967, CR45735, nAChRalpha4, alpha-Cat, mir-4942, ND-MLRQ
P61	novobreak	TRA	3R	17628149	X	18565674	4	0	somatic_tumour	937.5	3R:17628149 X:18565674	0.09	0	-	-	AAATATGGGATATTATCGTAATTTGTCAAAAAAAAAAAGGTTCCAAGTTCCTTAAAATCGCTGGTTGAGATTCTAACCAAGACGGTGGGTTGCAATTACCAAATGGGCTGCAACCAACTGACTGTCAGGGATATTCTACACTTGACC	NHEJ	CG14325, exon_3	Bx, intron	CG14325, Bx
P61	Control-Freec	DUP	3R	17690157	3R	17718938	-	-	somatic_tumour	28.8	3R:17690157-17718938	0.32	0.4	-	-	-	-	osa, exon	intergenic	osa, CR46036, CR46035
P61	Control-Freec	DEL	3R	31933366	3R	32079331	-	-	somatic_tumour	146	3R:31933366-32079331	0.28	-0.54	-	-	-	-	heph, intron	intergenic	heph, CG2003, CR45556, CR45557, CG2053, krz, mod, Map205
P61	delly	DEL	X	3067156	X	3159711	9	16	somatic_tumour	92.6	X:3067156-3159711	0.98	-2.7	-	-	GCTCCATTGGAAGTCGTGGTGACCAGGCCAGTTCCGGTTCCCGAAGTCGTTCCTGTTGTTCCCGTCGATGAAGTAGCTGCCACAAGGGGCAAACTCGTTTGTCAGCTAAGAAAAACCCCTTTGCCGACTCGACCGGCCCAGCATCATTCATC	-	CG4116, exon	N, intron	kirre, CG4116, N
P61	lumpy	DEL	X	3067156	X	3159711	9	16	somatic_tumour	92.6	X:3067156-3159711	0.98	-2.7	-	-	-	-	CG4116, exon	N, intron	kirre, CG4116, N
P61	novobreak	DEL	X	3067156	X	3159711	9	16	somatic_tumour	92.6	X:3067156-3159711	0.98	-2.7	-	-	GGTTCACATAGATAGCTCCATTGGAAGTCGTGGTGACCAGGCCAGTTCCGGTTCCCGAAGTCGTTCCTGTTGTTCCCGTCGATGAAGTAGCTGCCACAAGGGGCAAACTCGTTTGTCAGCTAAGAAAAACCCCTTTGCCGACTCGACCGGCCCAGCATCATTCATCAGTTTTTGAC	-	CG4116, exon	N, intron	kirre, CG4116, N
P61	Control-Freec	DEL	X	3067716	X	3160831	-	-	somatic_tumour	93.1	X:3067716-3160831	0.94	-2.67	-	-	-	-	kirre, intron	N, intron	kirre, N
P61	Control-Freec	DEL	X	9170981	X	9191297	-	-	somatic_tumour	20.3	X:9170981-9191297	0.66	-0.72	-	-	-	-	mei-P26, 3UTR	intergenic	mei-P26, CG12115
P61	lumpy	DEL	X	19890758	X	19892413	7	0	somatic_tumour	1.7	X:19890758-19892413	0.52	-2.64	-	-	-	-	Hers, intron	Hers, 5UTR	Hers
P61	novobreak	DEL	X	19890758	X	19892413	7	0	somatic_tumour	1.7	X:19890758-19892413	0.52	-2.64	-	-	ATATGATCTATACACTTATGTATATTACTTAATAATTAAAAGGAGAGGACGGCACTACGTTTAACTCGATGGCCAGCACAGGCGGCACAATGAATAATGAACTCACTCGAACCGAACTCCAAAACCGGAAGGCACCGAAACAATTTTGCCATGTGCCTATTATATGGTATTATTTTCATTGTGCTTTGCTTTTTTATGTATTTGTGCCGAAATCTGGACAGAAAGCTAGAAAATAAATAGGAG	-	Hers, intron	Hers, 5UTR	Hers
P63	novobreak	TRA	2L	7888676	2R	7170648	3	0	somatic_tumour	718	2L:7888676 2R:7170648	0.04	0	GCCAGC	-	CAGCCTAGAAAGTACAGTTGCCTCCGGCAAACTCTTTCGTCTTTCGAATGCTTAATTGCTGGCCGATCGAATGAAGGCAGCCTGGGCTATAAACGATTGGGTGCTCGATCAGACACTAGA	Alt-EJ	Spn28Da, exon_2	pk, intron	Spn28Da, pk
P63	novobreak	TRA	2L	20336099	3L	2623731	3	0	somatic_tumour	17712.4	2L:20336099 3L:2623731	0.06	0	-	-	GGTTTTGGGTTATTCCCAGAATTTGTTATGAATAAATGTAGGTGAGATGGAACCGCAGAAAATAAATTAAACAAACCAGACTGAACGGCAAGGGCAAAAAACCGTAACAACAATATATATTATATTT	NHEJ	spir, intron	Pxn, intron	spir, Pxn
P63	delly	DEL	2R	8149322	2R	8149353	11	2	somatic_tumour	0	2R:8149322-8149353	0.22	0	-	-	TACATGTGTAAGCACTTCCGCCGGAGAAAAGCCGCGGTTCATGAACCTTTTGAATCTCCGCTAATTATACGTACATGAGGGGAATGACGTTGCATTTACACACTTAAATTTTGATCGATTTAGAGAAGTCTCTTGAATAAAAAGGCCCAGAGAAATTTAAGGCACAGACTTGCT	NHEJ	kermit, exon_1	kermit, exon_1	Lpin, kermit
P63	novobreak	TRA	2R	16168568	3L	20283281	3	0	somatic_tumour	4114.7	2R:16168568 3L:20283281	0.04	0	GCCA	-	GACTTGGAGGCCCAGCAGGATCATTTGTCCAGCAAGGACTCGGGCACCGGTTCGGATGCGGCTGTGAAACGCACTCTGGATGACTTTGAGGTGGCCACCCAGTCCCAGTATTCCCTGCTCCGTACTCCGCGGAGTTTACGGCGAAGTCACCCCAAAATGTTGTTGGCCGAGTCCGAAC	Alt-EJ	lbk, exon	gogo, intron	lbk, gogo
P63	novobreak	TRA	2R	23886797	3R	31013782	3	0	somatic_tumour	7127	2R:23886797 3R:31013782	0.04	0	GGCAC	-	GGTGGTGGTGCCTGGCCAGCTGCGGAGCGATCTCCCCTCATGTCCATGCAAAGATCGTGCTTGTGCTCCGAGAGTCGCGCACAAGTCAAGTGGCACAATAATTGAGGAGCCGCCCGAGTTAGCAAATAGTCCAGCCTTACCATGCAGAAGAAAAC	Alt-EJ	intergenic	5-HT7, intron	5-HT7
P63	Control-Freec	DEL	3L	26370954	3L	26377602	-	-	somatic_tumour	6.6	3L:26370954-26377602	0.25	-0.54	-	-	-	-	CG42598, intron	intergenic	CG42598
P63	CNV-Seq	COMPLEX_DEL	X	3170682	X	3194381	-	-	somatic_tumour	23	X:3170682-3194381	0.96	-3.84	-	-	-	-	N, exon	dnc, intron	N, CG18508, Fcp3C, CG3939, dnc
P63	lumpy	COMPLEX_BND	X	3195652	X	3199676	25	5	somatic_tumour	4	X:3195652-3199676	0.24	1.64	-	TATGAAATCCTA	-	FoSTeS	dnc, intron	dnc, intron	dnc
P63	novobreak	COMPLEX_BND	X	3195652	X	3199676	25	5	somatic_tumour	4	X:3195652-3199676	0.24	1.64	-	TATGAAATCCTA	GTAAACATTTTAAATTGCAATAGGAAAATATTTTTAGCCCTCCTATTTAACCCCTTGAAGGCCCATTGCCTCCTTAACCCCTATGTGTTCCTCTTGTTGACACTTGGCTGGATGAAGATGCACATTTTGTGGCTTAGTTGAAGCTTAGTGCTGAGTTATGTTAGGATTTCATATAATAGGATTCATATACATAAACTTGATGATATGGTATAAGTGCTTTTGCCTCTTCAATGGTCCTTCAATGGTATCAGTAGCCCCGGGATTTTGCCGCCTGGATGATGGCCTTGTATTTTGGGACACAGATTTACCATGCCACATTTTCCGCCATCCTGTTTAGTCC	FoSTeS	dnc, intron	dnc, intron	dnc
P63	Control-Freec	COMPLEX_DUP	X	3196026	X	3199350	-	-	somatic_tumour	3.3	X:3196026-3199350	0.8	1.6	-	-	-	-	dnc, intron	dnc, intron	dnc
P65	novobreak	TRA	3L	3775419	X	19780138	3	0	somatic_tumour	16004.7	3L:3775419 X:19780138	0.1	0	ACGA	-	CTGCTGCTGCTGGTTGTTGCTGTTGTTGTTGGAAGCGTGCTGTGGTGAAGCGTTTGTCGTCAACGTCGTCGTCATTATCATCCTGTGCAGACATCCGACCAGAC	Alt-EJ	CG32264, intron	zld, exon_2	CG32264, zld
P65	delly	DEL	X	3162637	X	3165495	2	8	somatic_tumour	2.9	X:3162637-3165495	0.35	-1.24	-	-	CTGTTGTGCGAGTGAGAACGGTGGAACCTGTCTGGATGG	NHEJ	N, intron	N, exon_6	N
P65	novobreak	DEL	X	3162637	X	3165495	2	8	somatic_tumour	2.9	X:3162637-3165495	0.35	-1.24	-	-	TATTACAACTGTTTGCTGTTCTGAAATCCAAGATAACAGCAAACTTTCTTTTATGCTGCCCTCTGTTGTGCGAGTGAGAACGGTGGAACCTGTCTGGATGGGATCGGTGACTATAGCTGCCTGTGCGTGGATGGCTTCGATGGCAAGCACTGCGAGACGGACATCAATGAGTGCTTGAGTCAGCCGTGCCAGAA	NHEJ	N, intron	N, exon_6	N
D1	novobreak	TRA	2R	6268113	3L	24250729	1	2	somatic_tumour	17982.6	2R:6268113 3L:24250729	0.03	0	-	-	GGATACGTAAAAGCTGACCCTTCTGCCTTCAATTTCAGCTGTAATTGCCCCAGTCGAAAATTGGGGTTAAGTTTACGGAGAGTTATAGCGTGATTGGTAGTCCGAAATGGACATTGAAATTAAATTAAAGCGATTTTAAATTGATCTAAATTCGTTACAGCACCTTTTCAGAAATAATAGGAAGTGAACTAGCCGATCAAGC	-	intergenic	Snap25, intron	Snap25
D1	novobreak	TRA	3L	11879024	2R	21463775	5	0	somatic_tumour	9584.8	3L:11879024 2R:21463775	0.08	0	-	-	CACTGAAATCACACGAAGAGCAAATAAATTTTCACCGAACAGCTGCTGTAAATTATTTGCGATTAATTGGGCGTGCAATTAAAATGCGAAATAAATGCTCAACACAAAAAAAAAAAAAGACAAATACAACAACTCCAATGGTAATGAACAAATAATTAC	-	CG44837, intron	Sdc, intron	CG44837, Sdc
D1	Control-Freec	DEL	X	2785056	X	3337404	-	-	somatic_tumour	552.3	X:2785056-3337404	0.61	-0.63	-	-	-	-	CG32795, exon_4	CR44886, ncRNA	kirre, CG32795, w, CG12498, CG14416, CG14417, CG14418, CG14419, CG3526, CG3588, CG14424, CG32793, CG3592, CG3598, CG14420, CG14421, CG14422, CG14423, CG17959, CG3603, rst, CG4116, N, CG18508, Fcp3C, CG3939, CG14265, ng2, ng3, ng1, ng4, Pig1, Sgs4, CG10793, dnc, CR44886
D1	lumpy	DEL	X	2785301	X	3336717	4	1	somatic_tumour	551.4	X:2785301-3336717	0.21	-0.63	-	-	-	-	CG32795, intron	CR44886, ncRNA	kirre, CG32795, w, CG12498, CG14416, CG14417, CG14418, CG14419, CG3526, CG3588, CG14424, CG32793, CG3592, CG3598, CG14420, CG14421, CG14422, CG14423, CG17959, CG3603, rst, CG4116, N, CG18508, Fcp3C, CG3939, CG14265, ng2, ng3, ng1, ng4, Pig1, Sgs4, CG10793, dnc, CR44886
D1	novobreak	DEL	X	2785301	X	3336717	4	1	somatic_tumour	551.4	X:2785301-3336717	0.21	-0.63	-	-	GGATCGGGTGGGCCAATATACACTTTGCGTCATCGAATACAGATAAGATTACTTTCTCATAAATTGAGTGTAAAGATAATTTGGAATTTGAAATGAATATTAATTTATGCACAGGCAATTTGAATTTGAATTTGCTCTCCATGCCACAAACAGCGACAAACAAACAAAAACAAAAACAAAAGCAAAAACAATTGGGCTGCGAGGGTTTAAGGGCTGCGGCCCCAAAA	-	CG32795, intron	CR44886, ncRNA	kirre, CG32795, w, CG12498, CG14416, CG14417, CG14418, CG14419, CG3526, CG3588, CG14424, CG32793, CG3592, CG3598, CG14420, CG14421, CG14422, CG14423, CG17959, CG3603, rst, CG4116, N, CG18508, Fcp3C, CG3939, CG14265, ng2, ng3, ng1, ng4, Pig1, Sgs4, CG10793, dnc, CR44886
D1	novobreak	DEL	X	3134156	X	3136185	9	2	somatic_tumour	2	X:3134156-3136185	0.65	-1.56	-	-	TTCACTAAGCCAATACTGTAATTAATTAACTAATTTATTGTTTCATATTTTATTTTTTGTTTCTTTCGAGAATATACATATGTATGTATTTATCTAAAGTAATTCTGAAAATGCTTAAAAATAATGCCCGTTCGTTTAAACTTGCATAGCTAGGAAATGTTGGTCTATAAAATCGGATGCATTCGCAACACATATAAGTGACTGAGCAAATCCATGCAACTGTAATCCAAAAAGGAAGTGGTGCTACTTAATCTGCTTAATAAGCCCATAGGATTGTTGCAAATC	-	kirre, 3UTR	N, intron	kirre, N
D3	lumpy	DEL	3R	29320606	3R	29376068	14	8	somatic_tumour	55.5	3R:29320606-29376068	0.23	-0.23	-	-	-	-	intergenic	intergenic	-
D3	novobreak	DEL	3R	29320606	3R	29376079	12	4	somatic_tumour	55.5	3R:29320606-29376079	0.17	-0.23	-	-	ACTCGTAATCGAACTCCCCTTCCAACCAAAATCAAATTTTGGAAAAAAAATTTTGAGCCAAATTTTGCAAAAAATGATGATGGTACCCCTTACAAAAAATTCAAAAATGGCCAAAATATGGATTTTGGAAAAACGGTGATGGACTGGCAGTTTTGTCAGATGGCAAATTTAATGCGAAAGAAATCGTGTTCTATGTTCAATTAAATTGACGGTAAATAATACCATTAGAATATATTT	-	intergenic	intergenic	-
D3	Control-Freec	DEL	X	3090477	X	3154453	-	-	somatic_tumour	64	X:3090477-3154453	0.72	-0.82	-	-	-	-	kirre, intron	N, intron	kirre, N
D5	novobreak	BND	2L	17782723	2L	17782826	19	0	somatic_tumour	0.1	2L:17782723-17782826	0.7	0	-	-	CATTTCATTATTTTATAAGAGTTTATATTATAAGCTAATATAAACTATTCTAGCTCAAGTCAAAAAATCAGCATGATAACATACGTAGGTTACTTAATAACATAAAACATAATAGGTTATTAACCTTAACCTTAAGATAGAATTCTAAAGGTGATAATAGTAAGATAGATTAGGTAGCACTTTAACTATTTAATTTTGTTAATAAAAAATACCTGAATTCATGAAGACTTAGGATGCAGCTTCCTTCTCCTTTCAGC	-	intergenic	intergenic	-
D5	novobreak	TRA	2R	11730762	X	3353629	12	0	somatic_tumour	8377.1	2R:11730762 X:3353629	0.32	0	-	-	TTAATTTATTATATTTATCTTTTAGGTTTTATATGAAAAAAAAAAAAAAAAAAAAAAATTAAAAACAAAAATGTTAATTAATTTCTGTATAGAAATTTCTGTGCATAGAAACTCCGGCCGATAATCTTGCTTTGGTTTACTCTCGGAGAAATCCAATC	-	intergenic	intergenic	-
D5	lumpy	BND	2R	12768397	2R	12768492	2	2	somatic_normal	0.1	2R:12768397-12768492	0.083	0	-	-	-	-	intergenic	intergenic	-
D5	Control-Freec	DUP	3L	14292214	3L	14297176	-	-	somatic_tumour	5	3L:14292214-14297176	0.41	0.52	-	-	-	-	fz, intron	fz, intron	fz
D5	novobreak	DEL	3L	18257813	3L	18258031	10	0	germline_private	0.2	3L:18257813-18258031	-	0	-	-	AGCAAGCTAAATTTTTAATTTAGTATGCAGATCTAGATCAATAAAAGTAAAAATTATTAATAAAGCTAAAATTGTTCTGTATAACATGTTTATAATATAATTATTACATTATTTTAATATATTTTAACTATTTATTTAATATTAATAATAATGGGTTCTATTTTGCTTTAACACTTTTGCTTTTGTGTGCATGTAATTATTAATGTATGGCAGGCAAATTCTTTTATTTTTAGGTTTCGCATTATGCAATTTATTTCAGGTCTACTGCTTGGAAAGCTTTCTGCACATTTTATGCCCCGATGGACAAGCCTTTTTTGATTAATTACGAGCTTAAAATGTGACATAATTGAGGAGGGGCTCAAAAAGGCGTCTTTAATTATTAATTGCCCTTAGAAGTGA…	-	intergenic	intergenic	-
D5	Control-Freec	DUP	3L	19588322	3L	19590803	-	-	somatic_tumour	2.5	3L:19588322-19590803	0.39	0.51	-	-	-	-	CG9330, exon_6	ash1, 3UTR	CG9330, CG14100, ash1
D5	novobreak	TRA	3L	28110227	211000000000000	196	52	16	germline_private	28110	3L:28110227 211000022278951:196	-	0	-	-	ATTCTATGTTACTCTATGTTATTCCATGTTATTCTATGTTGTTCTATGTTATTATATGTTATTCTATGTTTTTCTATGTTATCCAATGTTATTCAATGTAATTCAATGTTATTCTATGTTATTCTTTGTTATTCTATGTTTTTCTATGTTATGCTATGTTATTCAATGTTATTCTATGTTAGTCTATGCCATTCTATGTTA	-	intergenic	intergenic	-
D5	novobreak	DUP	3R	4634949	3R	4636707	36	34	germline_private	1.8	3R:4634949-4636707	-	0	-	-	TCCAGAAACATTAAAGCTTTATAACGACAAAGATTTCAAGAGCATGCAGACTAATTATTATTCTGGTCACGTCTATACCGAAAAATCCAAACTAAATGCAATCAATTCTATTTAAATTCCCAATATATTGAGACTAGATATTTCATTTGCGAATTTACTTAAATAAATAAATAAATATTAAATAGGACAGGACAGAGTAAAAACTAACCAATGCAAACAGCCTTTGCGAACCCACTACCCTTAATTTCCCCACAATCTAAACCGAAAGTAATTTGGATCAAACTAAGAAAACTGGGTGGCCTCCACAAGAC	-	intergenic	intergenic	-
D5	novobreak	DEL	3R	14095060	3R	14095577	10	2	somatic_tumour	0.5	3R:14095060-14095577	0.29	0	-	-	CTTTAATTGCTTAATAGTGAGCTGATAATTATAAATTTGTCATGACATTCTGAGATATCAACAAAATTTATGCTAGAGAGAAAAGGCATATATATAAATTAAATATAAACTTTATAAACTTTATAAACTATTTTTCTTATATATTCAAACTTTTAGCTAAAGTAGGGAATTTGTAAAAATCTTTTAAACTTTAACCATTAAGATCTTGCTAAATATTTTTTATCCGTGTGATGGTCTTTGGCACGCAGTTGGGATTAATTTACGATGGCAATCGAAAGCGTTAAAAGCGTGTTGGCAGGGCAGTGTGTCGGTTCCGATGGTGAAATCGAGAGCCCCTGATCTCTCCAATCCGCAGTGGAAAGCCCTATTTCCCCCGATCCCCGGATTC	-	CCHa1, intron	CCHa1, intron	CCHa1
D5	Control-Freec	DUP	4	176978	4	181113	-	-	somatic_tumour	4.1	4:176978-181113	0.41	0.56	-	-	-	-	intergenic	intergenic	Arl4
D5	Control-Freec	DUP	4	625212	4	632655	-	-	somatic_tumour	7.4	4:625212-632655	0.37	0.42	-	-	-	-	mav, exon_1	Gat, exon_5	mav, mir-954, Gat
D7	lumpy	DEL	2R	14517488	2R	14518749	8	1	somatic_tumour	1.3	2R:14517488-14518749	0.16	-0.67	-	-	-	-	intergenic	intergenic	-
D7	Control-Freec	DUP	3R	15596258	3R	15598916	-	-	somatic_tumour	2.7	3R:15596258-15598916	0.41	0.33	-	-	-	-	intergenic	intergenic	-
D7	Control-Freec	DEL	X	3158590	X	3162134	-	-	somatic_tumour	3.5	X:3158590-3162134	0.98	-2.83	-	-	-	-	N, intron	N, intron	N
D7	lumpy	DEL	X	3158734	X	3161854	10	1	somatic_tumour	3.1	X:3158734-3161854	0.59	-2.96	-	-	-	-	N, intron	N, intron	N
P1	lumpy	TRA	2L	16310775	4	1148246	3	0	somatic_tumour	15162.5	2L:16310775 4:1148246	0.1	0	CGGTCAC	-	-	Alt-EJ	intergenic	Kif3C, intron	CG32017, Kif3C
P1	Control-Freec	DUP	2R	13941000	2R	13946000	-	-	somatic_tumour	5	2R:13941000-13946000	0.38	0.44	-	-	-	-	shot, intron	AGO1, 3UTR	shot, DJ-1alpha, AGO1
P1	delly	DEL	3L	9892365	3L	9894889	4	2	somatic_tumour	2.5	3L:9892365-9894889	0.35	-0.76	TA	-	CTCTTAAATTACTTGCAATTGCTACTATATTTCAAAAGTAAACCGTTCCTTTTAATCATATATATATATGCAATTTCGCAGTTTAGCAGTTGCTGTCTAAATTAATTTTCTTTATAT	Alt-EJ	CalpB, 3UTR	CG6707, 3UTR	CalpB, CG14164, CG6709, CG6707
P1	novobreak	DEL	3L	9892365	3L	9894889	4	2	somatic_tumour	2.5	3L:9892365-9894889	0.35	-0.76	TA	-	GTGTGCCATCAAGGTTAGAACATTCATCGAGATGTTCCGCGAACGGGACACGGACAATTCAGACACGGCCTTCTTCAACTTGGACGACTGGCTGGAGCGAACAATTTACTCTTAAATTACTTGCAATTGCTACTATATTTCAAAAGTAAACCGTTCCTTTTAATCATATATATATATGCAATTTCGCAGTTTAGCAGTTGCTGTCTAAATTAATTTTCTTTATATCTGCATGAGCGTTTGCTTGTTCTCTGTTGTTCAAGAAATGTTGCTTTGTTTATTTGC	Alt-EJ	CalpB, 3UTR	CG6707, 3UTR	CalpB, CG14164, CG6709, CG6707
P1	Control-Freec	DUP	3L	15393000	3L	15396000	-	-	somatic_tumour	3	3L:15393000-15396000	0.43	0.56	-	-	-	-	intergenic	intergenic	-
P1	CNV-Seq	DEL	X	2793253	X	3266169	-	-	somatic_tumour	472	X:2793253-3266169	0.9	-1.64	-	-	-	-	w, intron	dnc, intron	kirre, w, CG12498, CG14416, CG14417, CG14418, CG14419, CG3526, CG3588, CG14424, CG32793, CG3592, CG3598, CG14420, CG14421, CG14422, CG14423, CG17959, CG3603, rst, CG4116, N, CG18508, Fcp3C, CG3939, CG14265, ng2, ng3, ng1, ng4, Pig1, Sgs4, dnc
P1	Control-Freec	DEL	X	2794000	X	3266000	-	-	somatic_tumour	472	X:2794000-3266000	0.9	-1.64	-	-	-	-	w, intron	dnc, intron	kirre, w, CG12498, CG14416, CG14417, CG14418, CG14419, CG3526, CG3588, CG14424, CG32793, CG3592, CG3598, CG14420, CG14421, CG14422, CG14423, CG17959, CG3603, rst, CG4116, N, CG18508, Fcp3C, CG3939, CG14265, ng2, ng3, ng1, ng4, Pig1, Sgs4, dnc
P1	lumpy	DEL	X	4586393	X	4588701	3	1	somatic_tumour	2.3	X:4586393-4588701	0.56	-1.19	-	-	-	NHEJ	CR32773, ncRNA	CR32773, ncRNA	CR32773
P3	CNV-Seq	COMPLEX_DEL	X	3169736	X	3199425	-	-	somatic_tumour	30	X:3169736-3199425	0.95	-3.05	-	-	-	-	N, exon_7	dnc, intron	N, CG18508, Fcp3C, CG3939, dnc
P3	CNV-Seq	COMPLEX_DUP	X	3199425	X	3215747	-	-	somatic_tumour	30	X:3199425-3215747	0.89	0.81	-	-	-	-	dnc, intron	dnc, intron	dnc
P3	lumpy	COMPLEX_BND	X	3199427	X	3200763	6	1	somatic_tumour	1.3	X:3199427-3200763	0.54	0.24	-	GTATACATGCAATATGATATGATAACACA	-	FoSTeS	dnc, intron	dnc, intron	dnc
P5	novobreak	TRA	3L	9960263	2R	13424638	3	0	somatic_tumour	3464.4	3L:9960263 2R:13424638	0.12	0	ATT	-	AACGATTTTGATATATTCAGTAAGTTAATTTGATTGATAATAGCTCAGCTAACACTGATTGACAAACGATTCATTCATTTATAAAAACAATTTACAAGACTAGTTCTAACAGTCGCTGATTAAGAA	Alt-EJ	CG34356, intron	CG42321, 5UTR	CG34356, CG42321
P5	novobreak	TRA	3R	27111074	2L	11937060	4	0	somatic_tumour	15174	3R:27111074 2L:11937060	0.15	0	-	-	CCCAGTCTAAAAATCAGATTCTGTAGGACTACTTCACTTCATTCAATCTACATATGTTATTTCGTTAAAAAAAAGGTAAAAGTGCAAAAAAAAATAACTAATATGATAATTGTTTACAAGGAAGTATTTAATATCATATGTAAATTAAGGAAAATGGGTTCCTTCTGGCGATAA	NHEJ	gb, intron	Or33b, intron	gb, Or33b
P5	delly	COMPLEX_BND	X	3129531	X	3364620	3	1	somatic_tumour	235.1	X:3129531-3364620	0.28	-2.84	C	-	GCGGCAGCATCGTCAGCGAATGATGAAAGCAAACCGAAGGGCGGCGACAATGGTGGTCAGCACTTTGCGAATGTTGCGAATGTGGAGGGCAAAAGAAAGAATGCCAAATAAATTAAAATATTACA	Alt-EJ	kirre, exon_9	intergenic	kirre, N, CG18508, Fcp3C, CG3939, dnc, CG14265, ng2, ng3, ng1, ng4, Pig1, Sgs4, CR44886, CG10793, CR46243
P5	lumpy	COMPLEX_BND	X	3129531	X	3364620	3	1	somatic_tumour	235.1	X:3129531-3364620	0.28	-2.84	C	-	-	Alt-EJ	kirre, exon_9	intergenic	kirre, N, CG18508, Fcp3C, CG3939, dnc, CG14265, ng2, ng3, ng1, ng4, Pig1, Sgs4, CR44886, CG10793, CR46243
P5	novobreak	COMPLEX_BND	X	3129531	X	3364620	3	1	somatic_tumour	235.1	X:3129531-3364620	0.28	-2.84	C	-	CTCCTCCTCATCCTCATCCTCGTCGAGTGGCTCCTCATCGGCGGCAGCATCGTCAGCGAATGATGAAAGCAAACCGAAGGGCGGCGACAATGGTGGTCAGCACTTTGCGAATGTTGCGAATGTGGAGGGCAAAAGAAAGAATGCCAAATAAATTAAAATATTACATCGCTGACCCTGAACCTCGTTTTTTTCGTATTGTTTTT	Alt-EJ	kirre, exon_9	intergenic	kirre, N, CG18508, Fcp3C, CG3939, dnc, CG14265, ng2, ng3, ng1, ng4, Pig1, Sgs4, CR44886, CG10793, CR46243
P5	CNV-Seq	COMPLEX_DEL	X	3129531	X	3364621	-	-	somatic_tumour	235.1	X:3129531-3364621	0.87	-2.84	-	-	-	-	kirre, exon_9	intergenic	kirre, N, CG18508, Fcp3C, CG3939, dnc, CG14265, ng2, ng3, ng1, ng4, Pig1, Sgs4, CR44886, CG10793, CR46243
P5	Control-Freec	COMPLEX_DEL	X	3129945	X	3164340	-	-	somatic_tumour	34.4	X:3129945-3164340	0.94	-3.07	-	-	-	-	kirre, exon_9	N, exon_6	kirre, N
P5	Control-Freec	COMPLEX_DEL	X	3171219	X	3352366	-	-	somatic_tumour	181.1	X:3171219-3352366	0.95	-3.18	-	-	-	-	N, 3UTR	intergenic	N, CG18508, Fcp3C, CG3939, dnc, CG14265, ng2, ng3, ng1, ng4, Pig1, Sgs4, CR44886, CG10793
P5	lumpy	COMPLEX_BND	X	3351890	X	3353248	10	0	somatic_tumour	1.4	X:3351890-3353248	0.87	-0.32	-	CTTTG	-	FoSTeS	intergenic	intergenic	-
P5	CNV-Seq	COMPLEX_DUP	X	3354465	X	3364533	-	-	somatic_tumour	10.1	X:3354465-3364533	0.92	0.89	-	-	-	-	intergenic	intergenic	CR46243
