# Supplementary material for: Evolution and genomic signatures of spontaneous somatic mutation in Drosophila intestinal stem cells
Source: HighWire-hosted journal article supplement (doi:10.1101/gr.268441.120), 2021-06-24
Supplement: Supplemental_table_S9.xlsx [file Supplemental_table_S9.xlsx]

## Sheet: SNVs
Supplemental Table S9					Somatic SNV and Indel calls throughout the genome
				All somatic SNV and Indel calls throughout the genome listed by sample and caller (strelka, mutect2, consensus). Genomic position, small insertion or deletion size is noted along with allele frequency
sample	chrom	pos	ref	alt	transition	allele_freq	cell_fraction	called_by	variant_type	feature	gene	id
P17	2L	1938632	A	T	T>A	0.321	0.642	somaticsniper,strelka	upstream_gene_variant	intron	Wdr62	FBgn0031374
P17	2L	2317697	G	T	C>A	0.0735	0.147	mutect2,strelka	intron_variant	intron	eys	FBgn0031414
P17	2L	5885285	G	C	C>G	0.423	0.846	somaticsniper,strelka	missense_variant	exon	CG43185	FBgn0262814
P17	2L	5885286	A	T	T>A	0.4	0.8	varscan2,somaticsniper,strelka	missense_variant	exon	CG43185	FBgn0262814
P17	2L	10499828	T	C	T>C	0.182	0.364	somaticsniper,strelka	intron_variant	intron	Myo31DF	FBgn0086347
P17	2L	11497941	T	A	T>A	0.0877	0.1754	mutect2,strelka	upstream_gene_variant	intron	CG6488	FBgn0032361
P17	2L	18803945	T	C	T>C	0.397	0.794	mutect2,varscan2,somaticsniper,strelka,freebayes	downstream_gene_variant	intergenic	intergenic	intergenic
P17	2R	5090312	A	T	T>A	0.425	0.85	varscan2,somaticsniper,strelka	upstream_gene_variant	intergenic	intergenic	intergenic
P17	2R	5090366	T	A	T>A	0.226	0.452	varscan2,somaticsniper,strelka	upstream_gene_variant	intergenic	intergenic	intergenic
P17	2R	5636779	A	T	T>A	0.186	0.372	somaticsniper,strelka	downstream_gene_variant	intergenic	intergenic	intergenic
P17	2R	5636780	A	G	T>C	0.191	0.382	somaticsniper,strelka	downstream_gene_variant	intergenic	intergenic	intergenic
P17	2R	14221396	T	A	T>A	0.2	0.4	somaticsniper,strelka	upstream_gene_variant	intron	CG8468	FBgn0033913
P17	2R	17884664	T	A	T>A	0.143	0.286	mutect2,somaticsniper	upstream_gene_variant	intron	Elk	FBgn0011589
P17	3L	1294551	C	T	C>T	0.149	0.298	somaticsniper,strelka	3_prime_UTR_variant	3UTR	CG32333	FBgn0052333
P17	3L	1294552	T	C	T>C	0.149	0.298	somaticsniper,strelka	3_prime_UTR_variant	3UTR	CG32333	FBgn0052333
P17	3L	1409648	G	C	C>G	0.151	0.302	somaticsniper,strelka	upstream_gene_variant	intron	Ptp61F	FBgn0267487
P17	3L	4584100	A	C	T>G	0.269	0.538	somaticsniper,strelka	intron_variant	intron	CG42540	FBgn0260657
P17	3L	4642796	T	G	T>G	0.2	0.4	somaticsniper,strelka	missense_variant	exon_20	axo	FBgn0262870
P17	3L	4642797	C	T	C>T	0.176	0.352	somaticsniper,strelka	synonymous_variant	exon_20	axo	FBgn0262870
P17	3L	6276318	C	A	C>A	0.294	0.588	varscan2,somaticsniper	3_prime_UTR_variant	3UTR	CG43168	FBgn0262787
P17	3L	9742026	A	T	T>A	0.357	0.714	somaticsniper,strelka	upstream_gene_variant	ncRNA	CR44348	FBgn0265448
P17	3L	9742027	G	A	C>T	0.352	0.704	varscan2,somaticsniper,strelka	upstream_gene_variant	ncRNA	CR44348	FBgn0265448
P17	3L	16874360	T	G	T>G	0.0725	0.145	mutect2,strelka	upstream_gene_variant	intron	Lmpt	FBgn0261565
P17	3L	21263476	A	T	T>A	0.102	0.204	mutect2,strelka	missense_variant	exon_4	Eip78C	FBgn0004865
P17	3L	25503902	T	A	T>A	0.315	0.63	varscan2,strelka	intron_variant	intron	CG45782	FBgn0267429
P17	3R	10918420	A	G	T>C	0.493	0.986	somaticsniper,strelka	intergenic_region	intergenic	intergenic	intergenic
P17	3R	21385533	C	A	C>A	0.235	0.47	somaticsniper,strelka	upstream_gene_variant	intergenic	intergenic	intergenic
P17	3R	25263347	G	A	C>T	0.397	0.794	mutect2,varscan2,somaticsniper,strelka,freebayes	synonymous_variant	exon	GlnRS	FBgn0027090
P17	3R	30170843	C	T	C>T	0.383	0.766	somaticsniper,strelka	upstream_gene_variant	intron	CG31028	FBgn0051028
P17	3R	30170844	A	T	T>A	0.414	0.828	varscan2,somaticsniper,strelka	upstream_gene_variant	intron	CG31028	FBgn0051028
P17	3R	30905930	C	T	C>T	0.53	1	somaticsniper,strelka	upstream_gene_variant	intergenic	intergenic	intergenic
P17	3R	30905931	C	G	C>G	0.53	1	varscan2,somaticsniper,strelka	upstream_gene_variant	intergenic	intergenic	intergenic
P17	X	15956460	A	C	T>G	0.161	0.161	somaticsniper,strelka	downstream_gene_variant	intron	mmd	FBgn0259110
P19	2L	2439328	T	C	T>C	0.245	0.49	varscan2,somaticsniper	intron_variant	intron	dpp	FBgn0000490
P19	2L	3394603	T	A	T>A	0.308	0.616	somaticsniper,strelka	upstream_gene_variant	intergenic	intergenic	intergenic
P19	2L	3960894	G	A	C>T	0.231	0.462	varscan2,somaticsniper	intron_variant	intron	fred	FBgn0051774
P19	2L	6091525	G	T	C>A	0.154	0.308	varscan2,somaticsniper	5_prime_UTR_premature_start_codon_gain_variant	5UTR	CG45075	FBgn0266445
P19	2L	7769066	G	A	C>T	0.237	0.474	mutect2,varscan2,somaticsniper,strelka,freebayes	downstream_gene_variant	intron	CG7191	FBgn0031945
P19	2L	9028026	C	A	C>A	0.385	0.77	mutect2,somaticsniper	upstream_gene_variant	ncRNA	CR44352	FBgn0265452
P19	2L	10004867	C	G	C>G	0.186	0.372	mutect2,varscan2,somaticsniper,strelka	upstream_gene_variant	exon_1	CR44873	FBgn0266167
P19	2L	10679097	A	G	T>C	0.2	0.4	somaticsniper,strelka	synonymous_variant	exon	CG17104	FBgn0040496
P19	2L	15068747	G	C	C>G	0.162	0.324	somaticsniper,strelka	missense_variant	intron	vig	FBgn0024183
P19	2L	15068757	T	C	T>C	0.19	0.38	somaticsniper,strelka	missense_variant	intron	vig	FBgn0024183
P19	2L	17990390	T	G	T>G	0.286	0.572	somaticsniper,strelka	upstream_gene_variant	intergenic	intergenic	intergenic
P19	2L	18352528	C	A	C>A	0.122	0.244	varscan2,strelka	downstream_gene_variant	intron	Fas3	FBgn0000636
P19	2R	5125222	A	G	T>C	0.12	0.24	mutect2,strelka	upstream_gene_variant	intron	gus	FBgn0026238
P19	2R	10692712	G	A	C>T	0.289	0.578	mutect2,varscan2,somaticsniper,strelka,freebayes	intron_variant	intron	stan	FBgn0024836
P19	2R	12671499	C	A	C>A	0.238	0.476	somaticsniper,strelka	missense_variant	exon	GLS	FBgn0261625
P19	2R	13909529	C	A	C>A	0.179	0.358	varscan2,somaticsniper	intron_variant	intron	shot	FBgn0013733
P19	2R	15232064	C	G	C>G	0.194	0.388	varscan2,somaticsniper	intron_variant	exon_6	CR44370	FBgn0265508
P19	2R	17810777	A	C	T>G	0.211	0.422	varscan2,somaticsniper	upstream_gene_variant	intron	grh	FBgn0259211
P19	2R	17882447	T	A	T>A	0.161	0.322	somaticsniper,strelka	upstream_gene_variant	intron	Elk	FBgn0011589
P19	2R	17991485	G	T	C>A	0.0909	0.1818	mutect2,strelka	intron_variant	intron	dpr13	FBgn0034286
P19	2R	19226201	A	G	T>C	0.143	0.286	varscan2,somaticsniper	3_prime_UTR_variant	3UTR	hppy	FBgn0263395
P19	2R	20724687	C	T	C>T	0.188	0.376	somaticsniper,strelka	downstream_gene_variant	intron	dpr1	FBgn0040726
P19	2R	20902568	A	T	T>A	0.269	0.538	varscan2,somaticsniper,strelka	upstream_gene_variant	intron	otp	FBgn0015524
P19	2R	22460439	A	C	T>G	0.278	0.556	somaticsniper,strelka	intron_variant	intron	CG10384	FBgn0034731
P19	3L	2795771	C	T	C>T	0.179	0.358	somaticsniper,strelka	intron_variant	intron	Tet	FBgn0263392
P19	3L	6109890	T	A	T>A	0.333	0.666	somaticsniper,strelka	upstream_gene_variant	intron	Ets65A	FBgn0005658
P19	3L	6109891	A	G	T>C	0.333	0.666	varscan2,somaticsniper,strelka	upstream_gene_variant	intron	Ets65A	FBgn0005658
P19	3L	6155091	A	G	T>C	0.231	0.462	varscan2,somaticsniper	upstream_gene_variant	exon_1	CR45421	FBgn0266970
P19	3L	8368173	T	G	T>G	0.27	0.54	varscan2,somaticsniper	upstream_gene_variant	intergenic	intergenic	intergenic
P19	3L	10704714	C	T	C>T	0.19	0.38	somaticsniper,strelka	intergenic_region	intergenic	intergenic	intergenic
P19	3L	10704715	A	C	T>G	0.2	0.4	somaticsniper,strelka	intergenic_region	intergenic	intergenic	intergenic
P19	3L	11179847	G	A	C>T	0.417	0.834	varscan2,somaticsniper	downstream_gene_variant	intron	GlcAT-P	FBgn0036144
P19	3L	12197473	T	A	T>A	0.182	0.364	somaticsniper,strelka	upstream_gene_variant	intergenic	intergenic	intergenic
P19	3L	12240093	G	A	C>T	0.353	0.706	somaticsniper,strelka	intron_variant	intron	app	FBgn0260941
P19	3L	13334129	G	A	C>T	0.358	0.716	mutect2,varscan2,somaticsniper,strelka,freebayes	downstream_gene_variant	intergenic	intergenic	intergenic
P19	3L	18924664	G	A	C>T	0.211	0.422	mutect2,varscan2,somaticsniper,strelka	upstream_gene_variant	intron	CG32204	FBgn0052204
P19	3R	5008	A	G	T>C	0.25	0.5	somaticsniper,strelka	intergenic_region	intergenic	intergenic	intergenic
P19	3R	5009	A	T	T>A	0.25	0.5	somaticsniper,strelka	intergenic_region	intergenic	intergenic	intergenic
P19	3R	2879631	A	C	T>G	0.2	0.4	somaticsniper,strelka	intron_variant	intron	Pzl	FBgn0267430
P19	3R	5043350	G	A	C>T	0.148	0.296	varscan2,somaticsniper	downstream_gene_variant	intergenic	intergenic	intergenic
P19	3R	9294995	T	C	T>C	0.538	1	mutect2,varscan2,somaticsniper,strelka,freebayes	3_prime_UTR_variant	3UTR	CG8861	FBgn0037676
P19	3R	12429457	A	G	T>C	0.25	0.5	somaticsniper,strelka	upstream_gene_variant	intergenic	intergenic	intergenic
P19	3R	14414025	C	A	C>A	0.192	0.384	varscan2,somaticsniper	upstream_gene_variant	intron	cv-c	FBgn0086901
P19	3R	14414027	A	C	T>G	0.2	0.4	varscan2,somaticsniper	upstream_gene_variant	intron	cv-c	FBgn0086901
P19	3R	16903093	T	C	T>C	0.25	0.5	somaticsniper,strelka	upstream_gene_variant	ncRNA	iab-8	FBgn0264857
P19	3R	16903099	G	A	C>T	0.154	0.308	somaticsniper,strelka	upstream_gene_variant	ncRNA	iab-8	FBgn0264857
P19	3R	20802220	G	T	C>A	0.147	0.294	varscan2,somaticsniper	intron_variant	intron	Syp	FBgn0038826
P19	3R	21666841	T	A	T>A	0.19	0.38	somaticsniper,strelka	upstream_gene_variant	intron	DNApol-alpha180	FBgn0259113
P19	3R	21837486	A	G	T>C	0.154	0.308	varscan2,somaticsniper	downstream_gene_variant	intergenic	intergenic	intergenic
P19	3R	22732125	G	T	C>A	0.35	0.7	varscan2,somaticsniper	3_prime_UTR_variant	3UTR	CG45049	FBgn0266409
P19	3R	23225183	A	G	T>C	0.417	0.834	somaticsniper,strelka	upstream_gene_variant	intron	cnc	FBgn0262975
P19	3R	25521036	T	C	T>C	0.2	0.4	somaticsniper,strelka	intron_variant	intron	msi	FBgn0011666
P19	3R	25566446	C	T	C>T	0.25	0.5	varscan2,somaticsniper	intron_variant	intron	msi	FBgn0011666
P19	3R	26204753	G	C	C>G	0.25	0.5	somaticsniper,strelka	intron_variant	ncRNA	CR44320	FBgn0265379
P19	3R	30255615	T	C	T>C	0.219	0.438	somaticsniper,strelka	downstream_gene_variant	intergenic	intergenic	intergenic
P19	3R	30360867	A	G	T>C	0.231	0.462	varscan2,somaticsniper	synonymous_variant	exon	hdc	FBgn0010113
P19	3R	31497837	G	A	C>T	0.227	0.454	somaticsniper,strelka	upstream_gene_variant	intergenic	intergenic	intergenic
P19	3R	31497838	T	C	T>C	0.227	0.454	somaticsniper,strelka	upstream_gene_variant	intergenic	intergenic	intergenic
P19	X	7218612	A	G	T>C	0.2	0.2	mutect2,somaticsniper	intron_variant	ncRNA	CR44357	FBgn0265457
P19	X	13347222	C	A	C>A	0.278	0.278	somaticsniper,strelka	upstream_gene_variant	intergenic	intergenic	intergenic
P19	X	14503474	C	T	C>T	0.167	0.167	mutect2,varscan2	intergenic_region	intergenic	intergenic	intergenic
P19	X	16636146	G	A	C>T	0.273	0.273	varscan2,somaticsniper	upstream_gene_variant	intron	Rok	FBgn0026181
P19	X	22926416	C	A	C>A	0.233	0.233	mutect2,somaticsniper	intergenic_region	intergenic	intergenic	intergenic
P7	2L	1238728	G	C	C>G	0.227	0.454	somaticsniper,strelka	upstream_gene_variant	intergenic	intergenic	intergenic
P7	2L	1558639	G	A	C>T	0.312	0.624	mutect2,somaticsniper	intron_variant	intron	haf	FBgn0261509
P7	2L	2119941	C	T	C>T	0.2	0.4	somaticsniper,strelka	intergenic_region	intergenic	intergenic	intergenic
P7	2L	2205812	G	T	C>A	0.167	0.334	mutect2,somaticsniper,strelka	missense_variant	exon_2	CG31668	FBgn0051668
P7	2L	3819082	C	A	C>A	0.25	0.5	somaticsniper,strelka	downstream_gene_variant	intergenic	intergenic	intergenic
P7	2L	5795502	C	A	C>A	0.182	0.364	mutect2,somaticsniper,strelka	intron_variant	intron	CG9171	FBgn0031738
P7	2L	6279231	G	T	C>A	0.2	0.4	mutect2,somaticsniper	intron_variant	intron	Ddr	FBgn0053531
P7	2L	9103414	C	T	C>T	0.2	0.4	somaticsniper,strelka	downstream_gene_variant	intergenic	intergenic	intergenic
P7	2L	9335207	A	C	T>G	0.3	0.6	somaticsniper,strelka	upstream_gene_variant	intron	Eaat1	FBgn0026439
P7	2L	10077534	G	T	C>A	0.6	1	somaticsniper,strelka	intron_variant	intron	CG44153	FBgn0265002
P7	2L	10279197	G	A	C>T	0.214	0.428	varscan2,strelka	synonymous_variant	exon	CG34043	FBgn0054043
P7	2L	10794905	C	T	C>T	0.13	0.26	varscan2,strelka	downstream_gene_variant	intron	CG31869	FBgn0051869
P7	2L	11142572	C	A	C>A	1	1	somaticsniper,strelka	downstream_gene_variant	intron	Gyc32E	FBgn0010197
P7	2L	11606835	G	A	C>T	0.5	1	mutect2,varscan2,somaticsniper,strelka,freebayes	downstream_gene_variant	intron	kek2	FBgn0015400
P7	2L	12195124	C	A	C>A	0.13	0.26	mutect2,strelka	intron_variant	intron	bru1	FBgn0000114
P7	2L	12588976	G	C	C>G	0.545	1	mutect2,varscan2,somaticsniper,strelka,freebayes	intron_variant	intron	nub	FBgn0085424
P7	2L	13927183	A	T	T>A	0.462	0.924	somaticsniper,strelka	upstream_gene_variant	intron	Ance-3	FBgn0032536
P7	2L	17455354	A	C	T>G	0.429	0.858	somaticsniper,strelka	missense_variant	exon	SPH93	FBgn0032638
P7	2L	17535781	A	T	T>A	0.22	0.44	mutect2,somaticsniper	upstream_gene_variant	intergenic	intergenic	intergenic
P7	2L	20835178	C	A	C>A	0.143	0.286	mutect2,strelka	missense_variant	exon_2	Oseg5	FBgn0032891
P7	2L	21622298	A	G	T>C	0.214	0.428	somaticsniper,strelka	upstream_gene_variant	intron	CG2201	FBgn0032955
P7	2L	21800273	T	C	T>C	0.2	0.4	mutect2,somaticsniper	upstream_gene_variant	intergenic	intergenic	intergenic
P7	2L	22910246	G	T	C>A	0.312	0.624	somaticsniper,strelka	intergenic_region	intergenic	intergenic	intergenic
P7	2R	331130	T	G	T>G	0.28	0.56	mutect2,somaticsniper	intergenic_region	intron	CG45781	FBgn0267428
P7	2R	1954670	T	C	T>C	0.143	0.286	mutect2,strelka	intron_variant	intron	CG17684	FBgn0263780
P7	2R	2724965	T	C	T>C	0.478	0.956	somaticsniper,strelka	intergenic_region	intergenic	intergenic	intergenic
P7	2R	2724982	G	A	C>T	0.353	0.706	somaticsniper,strelka	intergenic_region	intergenic	intergenic	intergenic
P7	2R	4777587	A	C	T>G	0.32	0.64	somaticsniper,strelka	downstream_gene_variant	intergenic	intergenic	intergenic
P7	2R	4897470	C	T	C>T	0.238	0.476	somaticsniper,strelka	intron_variant	intron	CG44102	FBgn0264911
P7	2R	5306634	A	T	T>A	0.4	0.8	somaticsniper,strelka	upstream_gene_variant	intergenic	intergenic	intergenic
P7	2R	5306640	T	A	T>A	0.364	0.728	somaticsniper,strelka	upstream_gene_variant	intergenic	intergenic	intergenic
P7	2R	5421241	A	T	T>A	0.375	0.75	mutect2,somaticsniper	intron_variant	intron	laccase2	FBgn0259247
P7	2R	10563340	C	A	C>A	0.4	0.8	somaticsniper,strelka	intron_variant	intron	psq	FBgn0263102
P7	2R	12173157	A	C	T>G	0.294	0.588	somaticsniper,strelka	upstream_gene_variant	intron	Oda	FBgn0014184
P7	2R	12319776	G	T	C>A	0.222	0.444	somaticsniper,strelka	upstream_gene_variant	intergenic	intergenic	intergenic
P7	2R	13588212	T	G	T>G	0.417	0.834	somaticsniper,strelka	intron_variant	intron	CG45088	FBgn0266489
P7	2R	14070912	C	G	C>G	0.4	0.8	somaticsniper,strelka	intron_variant	intron	Prosap	FBgn0040752
P7	2R	14119661	A	T	T>A	0.333	0.666	mutect2,strelka	intron_variant	intron	Prosap	FBgn0040752
P7	2R	14520012	G	T	C>A	0.16	0.32	mutect2,somaticsniper,strelka	upstream_gene_variant	intergenic	intergenic	intergenic
P7	2R	15642480	G	C	C>G	0.188	0.376	varscan2,somaticsniper	intron_variant	intron	CG42524	FBgn0260429
P7	2R	16245719	C	A	C>A	0.294	0.588	somaticsniper,strelka	upstream_gene_variant	intron	CngA	FBgn0261612
P7	2R	17166247	G	C	C>G	0.4	0.8	somaticsniper,strelka	synonymous_variant	exon	CG10953	FBgn0034204
P7	2R	19150354	T	C	T>C	0.125	0.25	mutect2,strelka	upstream_gene_variant	intron	ena	FBgn0000578
P7	2R	21213402	C	A	C>A	0.129	0.258	mutect2,strelka	missense_variant	exon	CG4302	FBgn0027073
P7	2R	22278268	T	C	T>C	0.259	0.518	somaticsniper,strelka	intron_variant	intron	dve	FBgn0020307
P7	2R	23737156	C	A	C>A	0.167	0.334	mutect2,somaticsniper,strelka	missense_variant	exon_4	egl	FBgn0000562
P7	2R	23793464	G	T	C>A	0.222	0.444	mutect2,somaticsniper,strelka	upstream_gene_variant	intron	CG9850	FBgn0034903
P7	2R	24227203	A	G	T>C	0.208	0.416	varscan2,somaticsniper	intron_variant	intron	CG30419	FBgn0050419
P7	3L	286310	G	A	C>T	0.333	0.666	mutect2,somaticsniper	intron_variant	intron	RhoGEF3	FBgn0264707
P7	3L	604042	A	T	T>A	0.24	0.48	mutect2,somaticsniper	upstream_gene_variant	intergenic	intergenic	intergenic
P7	3L	1188738	C	A	C>A	0.16	0.32	somaticsniper,strelka	upstream_gene_variant	intergenic	intergenic	intergenic
P7	3L	1440123	A	G	T>C	0.235	0.47	somaticsniper,strelka	upstream_gene_variant	intron	Ptp61F	FBgn0267487
P7	3L	1862730	T	C	T>C	0.231	0.462	mutect2,strelka	upstream_gene_variant	intergenic	intergenic	intergenic
P7	3L	2555998	T	C	T>C	0.294	0.588	somaticsniper,strelka	3_prime_UTR_variant	3UTR	msn	FBgn0010909
P7	3L	2555999	A	C	T>G	0.294	0.588	somaticsniper,strelka	3_prime_UTR_variant	3UTR	msn	FBgn0010909
P7	3L	2828529	C	T	C>T	0.308	0.616	varscan2,somaticsniper	intron_variant	intron	Tet	FBgn0263392
P7	3L	4656913	A	C	T>G	0.2	0.4	somaticsniper,strelka	downstream_gene_variant	intron	axo	FBgn0262870
P7	3L	5077959	A	G	T>C	0.273	0.546	varscan2,strelka	intron_variant	intron	Con	FBgn0005775
P7	3L	5291964	T	C	T>C	0.273	0.546	varscan2,somaticsniper	intergenic_region	intergenic	intergenic	intergenic
P7	3L	5414069	G	C	C>G	0.222	0.444	mutect2,somaticsniper	intergenic_region	intergenic	intergenic	intergenic
P7	3L	8845641	G	T	C>A	0.25	0.5	somaticsniper,strelka	intron_variant	ncRNA	CR45823	FBgn0267473
P7	3L	8845642	G	T	C>A	0.25	0.5	varscan2,somaticsniper,strelka	intron_variant	ncRNA	CR45823	FBgn0267473
P7	3L	8845652	T	G	T>G	0.211	0.422	somaticsniper,strelka	intron_variant	ncRNA	CR45823	FBgn0267473
P7	3L	10905044	G	T	C>A	0.375	0.75	somaticsniper,strelka	intergenic_region	intergenic	intergenic	intergenic
P7	3L	11196314	T	A	T>A	0.444	0.888	somaticsniper,strelka	upstream_gene_variant	intron	GlcAT-P	FBgn0036144
P7	3L	13641692	C	A	C>A	0.211	0.422	mutect2,somaticsniper,strelka	intron_variant	intron	bru3	FBgn0264001
P7	3L	16474933	G	C	C>G	0.214	0.428	somaticsniper,strelka	intron_variant	intron	aos	FBgn0004569
P7	3L	19264100	A	T	T>A	0.35	0.7	varscan2,somaticsniper	splice_region_variant&intron_variant	intron	CG9666	FBgn0036856
P7	3L	19444015	A	G	T>C	0.222	0.444	varscan2,somaticsniper	upstream_gene_variant	intron	CG33062	FBgn0053062
P7	3L	19464395	C	G	C>G	0.267	0.534	varscan2,strelka	missense_variant	exon	CG14095	FBgn0036870
P7	3L	19561482	G	A	C>T	0.273	0.546	mutect2,somaticsniper	upstream_gene_variant	intergenic	intergenic	intergenic
P7	3L	21736406	C	T	C>T	0.19	0.38	mutect2,somaticsniper,strelka	upstream_gene_variant	intergenic	intergenic	intergenic
P7	3L	25445989	C	T	C>T	0.154	0.308	somaticsniper,strelka	intron_variant	intron	CG45782	FBgn0267429
P7	3L	26726573	C	G	C>G	0.2	0.4	somaticsniper,strelka	intergenic_region	intergenic	intergenic	intergenic
P7	3L	27131315	T	G	T>G	0.308	0.616	somaticsniper,strelka	downstream_gene_variant	intergenic	intergenic	intergenic
P7	3R	232446	G	A	C>T	0.2	0.4	somaticsniper,strelka	intergenic_region	intergenic	intergenic	intergenic
P7	3R	232457	G	C	C>G	0.22	0.44	somaticsniper,strelka	intergenic_region	intergenic	intergenic	intergenic
P7	3R	232458	T	G	T>G	0.22	0.44	somaticsniper,strelka	intergenic_region	intergenic	intergenic	intergenic
P7	3R	8733279	T	C	T>C	0.111	0.222	mutect2,varscan2	missense_variant	exon_5	CG8202	FBgn0037622
P7	3R	9818689	T	A	T>A	0.222	0.444	somaticsniper,strelka	upstream_gene_variant	intergenic	intergenic	intergenic
P7	3R	13763582	A	G	T>C	0.2	0.4	mutect2,somaticsniper	3_prime_UTR_variant	3UTR	CG34383	FBgn0085412
P7	3R	15427451	T	G	T>G	0.156	0.312	somaticsniper,strelka	upstream_gene_variant	intron	CG6118	FBgn0038339
P7	3R	16172381	G	T	C>A	0.174	0.348	somaticsniper,strelka	missense_variant	exon_1	CG8925	FBgn0038404
P7	3R	17209751	G	T	C>A	0.238	0.476	somaticsniper,strelka	intergenic_region	intergenic	intergenic	intergenic
P7	3R	17919260	T	C	T>C	0.533	1	mutect2,somaticsniper	upstream_gene_variant	intergenic	intergenic	intergenic
P7	3R	18816141	C	T	C>T	0.389	0.778	somaticsniper,strelka	intron_variant	intron	CG18208	FBgn0038653
P7	3R	19953343	C	A	C>A	0.182	0.364	mutect2,varscan2	downstream_gene_variant	intron	Hs6st	FBgn0038755
P7	3R	20459357	A	C	T>G	0.615	1	mutect2,varscan2,somaticsniper,strelka,freebayes	intron_variant	intron	Gfrl	FBgn0262869
P7	3R	21974584	T	C	T>C	0.182	0.364	somaticsniper,strelka	intron_variant	intron	Eip93F	FBgn0264490
P7	3R	22655764	T	A	T>A	0.25	0.5	varscan2,somaticsniper	intron_variant	intron	wake	FBgn0266418
P7	3R	25035920	C	A	C>A	0.136	0.272	mutect2,varscan2,strelka	missense_variant	exon_8	CG6422	FBgn0039261
P7	3R	25136454	A	T	T>A	0.333	0.666	varscan2,somaticsniper	3_prime_UTR_variant	3UTR	Bili	FBgn0039282
P7	3R	25384050	C	A	C>A	0.174	0.348	mutect2,somaticsniper	missense_variant	exon	CG31437	FBgn0051437
P7	3R	26399651	G	T	C>A	0.19	0.38	mutect2,varscan2,somaticsniper,strelka	downstream_gene_variant	intergenic	intergenic	intergenic
P7	3R	27993113	T	C	T>C	0.444	0.888	varscan2,somaticsniper	upstream_gene_variant	intergenic	intergenic	intergenic
P7	3R	28164561	A	G	T>C	0.216	0.432	mutect2,somaticsniper	intron_variant	intron	CG34354	FBgn0085383
P7	3R	30788017	G	T	C>A	0.182	0.364	mutect2,somaticsniper,strelka	3_prime_UTR_variant	3UTR	zfh1	FBgn0004606
P7	3R	31910559	A	G	T>C	0.158	0.316	mutect2,strelka	intron_variant	intron	heph	FBgn0011224
P7	X	371377	C	A	C>A	0.333	0.333	mutect2,strelka	downstream_gene_variant	intron	CG32816	FBgn0052816
P7	X	691230	G	A	C>T	0.438	0.438	mutect2,somaticsniper	intron_variant	intron	sdk	FBgn0021764
P7	X	884155	A	T	T>A	0.4	0.4	mutect2,strelka	intron_variant	intron	CG43867	FBgn0264449
P7	X	1152978	G	T	C>A	0.176	0.176	mutect2,strelka	intergenic_region	intergenic	intergenic	intergenic
P7	X	2680777	A	G	T>C	0.25	0.25	varscan2,strelka	missense_variant	exon	HLH3B	FBgn0011276
P7	X	2854886	C	A	C>A	0.294	0.294	freebayes	intron_variant	intron	kirre	FBgn0028369
P7	X	3835572	C	A	C>A	0.143	0.143	mutect2,strelka	upstream_gene_variant	intron	ec	FBgn0000542
P7	X	7241742	G	A	C>T	0.294	0.294	freebayes	3_prime_UTR_variant	ncRNA	CR44357	FBgn0265457
P7	X	8061182	C	G	C>G	0.333	0.333	mutect2,somaticsniper,strelka	upstream_gene_variant	intron	fs(1)h	FBgn0004656
P7	X	8221229	G	T	C>A	0.222	0.222	mutect2,somaticsniper,strelka	intron_variant	intron	sdt	FBgn0261873
P7	X	9659269	G	A	C>T	0.944	0.944	mutect2,varscan2,somaticsniper,strelka,freebayes	synonymous_variant	exon	CG3106	FBgn0030148
P7	X	9905539	T	A	T>A	0.308	0.308	somaticsniper,strelka	downstream_gene_variant	intergenic	intergenic	intergenic
P7	X	10209631	A	G	T>C	0.294	0.294	freebayes	5_prime_UTR_variant	exon_1	CG15309	FBgn0030183
P7	X	14303256	G	T	C>A	0.294	0.294	freebayes	intergenic_region	intergenic	intergenic	intergenic
P7	X	14380906	A	G	T>C	0.3	0.3	somaticsniper,strelka	missense_variant	exon	betaNACtes4	FBgn0030566
P7	X	14982171	C	A	C>A	0.111	0.111	mutect2,strelka	intron_variant	intron	eag	FBgn0000535
P7	X	15507803	G	T	C>A	0.429	0.429	somaticsniper,strelka	upstream_gene_variant	intron	Gmap	FBgn0027287
P7	X	15546046	G	T	C>A	0.25	0.25	mutect2,somaticsniper	upstream_gene_variant	intron	Ac13E	FBgn0022710
P7	X	15548207	C	A	C>A	0.444	0.444	somaticsniper,strelka	upstream_gene_variant	intron	Ac13E	FBgn0022710
P7	X	15698364	G	T	C>A	0.273	0.273	mutect2,somaticsniper,strelka	5_prime_UTR_variant	5UTR	CG8128	FBgn0030668
P7	X	16788550	C	A	C>A	0.286	0.286	mutect2,somaticsniper	upstream_gene_variant	intron	Sap30	FBgn0030788
P7	X	16820912	G	T	C>A	0.4	0.4	mutect2,somaticsniper,strelka	upstream_gene_variant	intron	CG4829	FBgn0030796
P7	X	17710002	G	T	C>A	1	1	somaticsniper,strelka	upstream_gene_variant	intergenic	intergenic	intergenic
P7	X	18287895	G	T	C>A	0.2	0.2	mutect2,somaticsniper,strelka	upstream_gene_variant	intergenic	intergenic	intergenic
P7	X	18385782	T	C	T>C	0.375	0.375	mutect2,somaticsniper	upstream_gene_variant	intergenic	intergenic	intergenic
P7	X	18445663	C	A	C>A	0.231	0.231	mutect2,somaticsniper,strelka	missense_variant	exon	CG32547	FBgn0052547
P7	X	19594995	T	G	T>G	0.25	0.25	mutect2,somaticsniper,strelka	synonymous_variant	exon_8	CG14205	FBgn0031034
P7	X	19861359	C	A	C>A	0.211	0.211	mutect2,somaticsniper,strelka	synonymous_variant	exon_6	CG15618	FBgn0031077
P7	X	21179514	G	T	C>A	0.3	0.3	mutect2,varscan2,somaticsniper,strelka	intergenic_region	intergenic	intergenic	intergenic
P7	X	22785755	C	A	C>A	0.3	0.3	mutect2,somaticsniper,strelka	intron_variant	ncRNA	CR44997	FBgn0266348
P9	2L	502027	A	T	T>A	0.292	0.584	varscan2,somaticsniper	intron_variant	exon_1	CR46259	FBgn0267992
P9	2L	1238728	G	C	C>G	0.24	0.48	somaticsniper,strelka	upstream_gene_variant	intergenic	intergenic	intergenic
P9	2L	5715433	T	G	T>G	0.182	0.364	somaticsniper,strelka	3_prime_UTR_variant	3UTR	CG14007	FBgn0031731
P9	2L	6799328	A	C	T>G	0.25	0.5	varscan2,somaticsniper	upstream_gene_variant	ncRNA	CR43610	FBgn0263585
P9	2L	7021570	T	C	T>C	0.175	0.35	varscan2,somaticsniper	upstream_gene_variant	intron	ade3	FBgn0000053
P9	2L	9173862	C	A	C>A	0.357	0.714	varscan2,somaticsniper	upstream_gene_variant	intron	tai	FBgn0041092
P9	2L	9874728	G	C	C>G	0.222	0.444	somaticsniper,strelka	intron_variant	intron	nAChRalpha6	FBgn0032151
P9	2L	10724761	T	A	T>A	0.227	0.454	somaticsniper,strelka	upstream_gene_variant	intron	CG6431	FBgn0032289
P9	2L	13554896	G	A	C>T	0.235	0.47	somaticsniper,strelka	intron_variant	intron	kuz	FBgn0259984
P9	2L	17790567	T	C	T>C	0.346	0.692	somaticsniper,strelka	upstream_gene_variant	intron	CadN2	FBgn0262018
P9	2L	18528346	T	A	T>A	0.242	0.484	mutect2,varscan2,somaticsniper,strelka,freebayes	upstream_gene_variant	intron	CG10211	FBgn0032685
P9	2L	20591685	G	A	C>T	0.176	0.352	varscan2,somaticsniper	intron_variant	ncRNA	CR44909	FBgn0266214
P9	2L	22213349	G	A	C>T	0.407	0.814	mutect2,varscan2,somaticsniper,strelka,freebayes	synonymous_variant	exon_3	Ir40a	FBgn0259683
P9	2R	8154135	C	T	C>T	0.229	0.458	somaticsniper,strelka	upstream_gene_variant	intron	kermit	FBgn0010504
P9	2R	8627688	A	T	T>A	0.217	0.434	somaticsniper,strelka	upstream_gene_variant	intergenic	intergenic	intergenic
P9	2R	8796766	T	A	T>A	0.526	1	varscan2,strelka	upstream_gene_variant	intergenic	intergenic	intergenic
P9	2R	9870324	T	A	T>A	0.312	0.624	somaticsniper,strelka	5_prime_UTR_variant	exon_1	cbx	FBgn0011241
P9	2R	11041872	C	G	C>G	0.333	0.666	varscan2,somaticsniper	intron_variant	intron	luna	FBgn0040765
P9	2R	11373538	C	A	C>A	0.0755	0.151	varscan2,strelka	upstream_gene_variant	intergenic	intergenic	intergenic
P9	2R	13568318	T	C	T>C	0.308	0.616	somaticsniper,strelka	downstream_gene_variant	intergenic	intergenic	intergenic
P9	2R	16360746	C	T	C>T	0.422	0.844	mutect2,somaticsniper,strelka,freebayes	synonymous_variant	exon_3	CG6262	FBgn0034121
P9	2R	20440749	A	T	T>A	0.2	0.4	somaticsniper,strelka	intron_variant	intron	CG12484	FBgn0086604
P9	2R	20759554	T	A	T>A	0.224	0.448	varscan2,somaticsniper	intergenic_region	intergenic	intergenic	intergenic
P9	2R	22213843	G	A	C>T	0.212	0.424	somaticsniper,strelka	upstream_gene_variant	intron	ari-2	FBgn0025186
P9	2R	23006049	A	C	T>G	0.286	0.572	varscan2,somaticsniper	intron_variant	intron	twi	FBgn0003900
P9	2R	23825550	C	A	C>A	0.173	0.346	varscan2,somaticsniper	upstream_gene_variant	intron	CG5549	FBgn0034911
P9	2R	24221695	G	T	C>A	0.15	0.3	varscan2,somaticsniper	intron_variant	intron	CG30419	FBgn0050419
P9	3L	3802483	G	A	C>T	0.136	0.272	mutect2,strelka	upstream_gene_variant	intron	CG32264	FBgn0052264
P9	3L	5217215	A	G	T>C	0.2	0.4	varscan2,somaticsniper	intron_variant	intron	shep	FBgn0052423
P9	3L	9017711	T	C	T>C	0.375	0.75	varscan2,somaticsniper	intron_variant	intron	Doc2	FBgn0035956
P9	3L	11318406	T	C	T>C	0.312	0.624	varscan2,somaticsniper	downstream_gene_variant	intergenic	intergenic	intergenic
P9	3L	12691940	A	G	T>C	0.2	0.4	somaticsniper,strelka	upstream_gene_variant	intergenic	intergenic	intergenic
P9	3L	18313354	G	T	C>A	0.375	0.75	mutect2,somaticsniper	intergenic_region	intergenic	intergenic	intergenic
P9	3R	1393409	G	A	C>T	0.25	0.5	somaticsniper,strelka	intron_variant	intron	Myo81F	FBgn0267431
P9	3R	10685367	C	T	C>T	0.258	0.516	somaticsniper,strelka	upstream_gene_variant	intergenic	intergenic	intergenic
P9	3R	11291330	T	G	T>G	0.211	0.422	varscan2,somaticsniper,strelka	intron_variant	ncRNA	CR31386	FBgn0051386
P9	3R	12283470	C	G	C>G	0.159	0.318	varscan2,somaticsniper	intron_variant	intron	svp	FBgn0003651
P9	3R	18191466	C	G	C>G	0.208	0.416	varscan2,somaticsniper	splice_region_variant&intron_variant	intron	CG14313	FBgn0038579
P9	3R	21179673	G	A	C>T	0.184	0.368	somaticsniper,strelka	upstream_gene_variant	intron	SNF4Agamma	FBgn0264357
P9	3R	22594715	A	G	T>C	0.174	0.348	varscan2,somaticsniper	intron_variant	intron	Efa6	FBgn0051158
P9	3R	22594720	T	C	T>C	0.154	0.308	varscan2,somaticsniper	intron_variant	intron	Efa6	FBgn0051158
P9	3R	26476480	A	G	T>C	0.158	0.316	varscan2,somaticsniper	intron_variant	intron	plum	FBgn0039431
P9	3R	28068004	C	T	C>T	0.243	0.486	varscan2,somaticsniper	intron_variant	intron	CG34362	FBgn0085391
P9	3R	29329225	C	A	C>A	0.273	0.546	varscan2,somaticsniper	intergenic_region	intergenic	intergenic	intergenic
P9	X	2790705	G	A	C>T	0.111	0.111	mutect2,strelka	3_prime_UTR_variant	3UTR	w	FBgn0003996
P9	X	3779323	C	A	C>A	0.235	0.235	mutect2,varscan2,somaticsniper,strelka	upstream_gene_variant	intron	Tlk	FBgn0283657
P9	X	8878400	G	A	C>T	0.286	0.286	varscan2,somaticsniper	upstream_gene_variant	intron	Moe	FBgn0011661
P9	X	10401805	A	G	T>C	0.368	0.368	varscan2,somaticsniper	intron_variant	intron	flw	FBgn0000711
P9	X	10401807	T	G	T>G	0.316	0.316	varscan2,somaticsniper	intron_variant	intron	flw	FBgn0000711
P11	2L	960850	G	A	C>T	0.158	0.316	varscan2,somaticsniper	downstream_gene_variant	intergenic	intergenic	intergenic
P11	2L	1615465	C	A	C>A	0.19	0.38	somaticsniper,strelka	upstream_gene_variant	intergenic	intergenic	intergenic
P11	2L	12225515	T	G	T>G	0.2	0.4	somaticsniper,strelka	intron_variant	intron	bru1	FBgn0000114
P11	2L	14387869	C	G	C>G	0.222	0.444	varscan2,somaticsniper	downstream_gene_variant	intergenic	intergenic	intergenic
P11	2L	15334684	C	G	C>G	0.278	0.556	mutect2,varscan2,somaticsniper,strelka,freebayes	missense_variant	exon	esg	FBgn0001981
P11	2L	16853109	A	C	T>G	0.194	0.388	somaticsniper,strelka	upstream_gene_variant	intergenic	intergenic	intergenic
P11	2L	19648070	G	C	C>G	0.368	0.736	somaticsniper,strelka	intron_variant	intron	CG46244	FBgn0267964
P11	2L	20909431	C	A	C>A	0.35	0.7	somaticsniper,strelka	intron_variant	intron	sky	FBgn0032901
P11	2R	13028350	C	T	C>T	0.28	0.56	varscan2,somaticsniper	intergenic_region	intergenic	intergenic	intergenic
P11	2R	13028355	G	A	C>T	0.292	0.584	varscan2,somaticsniper	intergenic_region	intergenic	intergenic	intergenic
P11	2R	13342972	T	C	T>C	0.154	0.308	varscan2,somaticsniper	intron_variant	ncRNA	CR44206	FBgn0265104
P11	2R	14042259	T	C	T>C	0.136	0.272	mutect2,strelka	intron_variant	intron	mam	FBgn0002643
P11	2R	15605866	T	C	T>C	0.25	0.5	somaticsniper,strelka	intergenic_region	intergenic	intergenic	intergenic
P11	2R	17175758	T	G	T>G	0.0811	0.1622	mutect2,varscan2	intergenic_region	intergenic	intergenic	intergenic
P11	2R	20605932	C	A	C>A	0.273	0.546	somaticsniper,strelka	splice_region_variant	3UTR	HnRNP-K	FBgn0267791
P11	2R	21962291	G	C	C>G	0.225	0.45	somaticsniper,strelka	upstream_gene_variant	intergenic	intergenic	intergenic
P11	3L	1686836	G	T	C>A	0.242	0.484	varscan2,somaticsniper	upstream_gene_variant	intron	CG7991	FBgn0035260
P11	3L	1942626	C	A	C>A	0.312	0.624	mutect2,varscan2,somaticsniper,strelka,freebayes	missense_variant	exon	Mfap1	FBgn0035294
P11	3L	2221376	C	T	C>T	0.282	0.564	somaticsniper,strelka	intergenic_region	intergenic	intergenic	intergenic
P11	3L	3796728	G	T	C>A	0.205	0.41	varscan2,somaticsniper	upstream_gene_variant	intron	CG32264	FBgn0052264
P11	3L	4565597	A	C	T>G	0.308	0.616	somaticsniper,strelka	intron_variant	intron	CG42540	FBgn0260657
P11	3L	5572199	A	G	T>C	0.162	0.324	varscan2,somaticsniper	upstream_gene_variant	intron	Msr-110	FBgn0015766
P11	3L	5965063	C	A	C>A	0.157	0.314	varscan2,somaticsniper	downstream_gene_variant	intergenic	intergenic	intergenic
P11	3L	8553132	C	G	C>G	0.0566	0.1132	mutect2,strelka	upstream_gene_variant	intron	rhea	FBgn0260442
P11	3L	8689100	T	G	T>G	0.216	0.432	somaticsniper,strelka	upstream_gene_variant	intergenic	intergenic	intergenic
P11	3L	9916049	T	C	T>C	0.158	0.316	varscan2,somaticsniper	intron_variant	intron	CG34356	FBgn0085385
P11	3L	10700825	G	A	C>T	0.225	0.45	varscan2,somaticsniper	upstream_gene_variant	intergenic	intergenic	intergenic
P11	3L	16539743	A	T	T>A	0.207	0.414	somaticsniper,strelka	downstream_gene_variant	intron	CG43373	FBgn0263131
P11	3L	20491397	T	A	T>A	0.206	0.412	somaticsniper,strelka	upstream_gene_variant	intron	ZnT77C	FBgn0037000
P11	3L	21776723	G	A	C>T	0.333	0.666	somaticsniper,strelka	non_coding_transcript_exon_variant	ncRNA	CR45958	FBgn0267620
P11	3R	7444194	C	T	C>T	0.0833	0.1666	mutect2,strelka	downstream_gene_variant	intergenic	intergenic	intergenic
P11	3R	8167712	C	T	C>T	0.231	0.462	varscan2,somaticsniper,strelka	intron_variant	intron	grn	FBgn0001138
P11	3R	8167715	C	T	C>T	0.231	0.462	varscan2,somaticsniper,strelka	intron_variant	intron	grn	FBgn0001138
P11	3R	10108158	C	T	C>T	0.19	0.38	somaticsniper,strelka	upstream_gene_variant	intron	Fmr1	FBgn0028734
P11	3R	10108159	A	G	T>C	0.227	0.454	somaticsniper,strelka	upstream_gene_variant	intron	Fmr1	FBgn0028734
P11	3R	14038026	A	T	T>A	0.174	0.348	somaticsniper,strelka	upstream_gene_variant	intergenic	intergenic	intergenic
P11	3R	14095361	C	A	C>A	0.185	0.37	varscan2,somaticsniper	downstream_gene_variant	intron	CCHa1	FBgn0038199
P11	3R	15141956	C	A	C>A	0.154	0.308	mutect2,varscan2,somaticsniper,strelka	3_prime_UTR_variant	3UTR	GlyS	FBgn0266064
P11	3R	16117305	T	G	T>G	0.05	0.1	mutect2,strelka	intron_variant	intron	Sb	FBgn0003319
P11	3R	17064603	G	C	C>G	0.171	0.342	mutect2,varscan2,somaticsniper,strelka	intron_variant	intron	Dad	FBgn0020493
P11	3R	20673240	A	T	T>A	0.316	0.632	somaticsniper,strelka	upstream_gene_variant	intergenic	intergenic	intergenic
P11	3R	21290288	G	A	C>T	0.203	0.406	mutect2,varscan2,somaticsniper,strelka,freebayes	intron_variant	intron	SIFaR	FBgn0038880
P11	3R	22925986	A	G	T>C	0.206	0.412	varscan2,somaticsniper	upstream_gene_variant	intron	klg	FBgn0017590
P11	3R	24709994	T	C	T>C	0.209	0.418	varscan2,somaticsniper	3_prime_UTR_variant	3UTR	slo	FBgn0003429
P11	3R	25314646	A	C	T>G	0.333	0.666	somaticsniper,strelka	3_prime_UTR_variant	3UTR	CG10559	FBgn0039323
P11	3R	26619387	A	C	T>G	0.216	0.432	somaticsniper,strelka	synonymous_variant	exon	TwdlM	FBgn0039434
P11	3R	26619402	A	C	T>G	0.273	0.546	somaticsniper,strelka	synonymous_variant	exon	TwdlM	FBgn0039434
P11	3R	26676436	G	C	C>G	0.259	0.518	varscan2,somaticsniper	intron_variant	intron	beat-VII	FBgn0250908
P11	3R	28302079	G	A	C>T	0.222	0.444	somaticsniper,strelka	downstream_gene_variant	intergenic	intergenic	intergenic
P11	3R	28302089	G	A	C>T	0.286	0.572	somaticsniper,strelka	downstream_gene_variant	intergenic	intergenic	intergenic
P11	3R	28302111	G	T	C>A	0.308	0.616	somaticsniper,strelka	downstream_gene_variant	intergenic	intergenic	intergenic
P11	X	3317161	T	C	T>C	0.214	0.214	varscan2,somaticsniper	upstream_gene_variant	ncRNA	CR44886	FBgn0266180
P11	X	4050673	C	T	C>T	0.364	0.364	varscan2,somaticsniper	upstream_gene_variant	intergenic	intergenic	intergenic
P11	X	7298275	A	G	T>C	0.6	0.6	somaticsniper,strelka	intron_variant	intron	CG1677	FBgn0029941
P11	X	19776493	G	A	C>T	0.286	0.286	mutect2,strelka	3_prime_UTR_variant	3UTR	zld	FBgn0259789
P15	2L	561795	T	G	T>G	0.151	0.302	somaticsniper,strelka	missense_variant	exon	CG11835	FBgn0031264
P15	2L	4642172	C	T	C>T	0.265	0.53	mutect2,varscan2,somaticsniper,strelka,freebayes	stop_gained	exon	BG642163	FBgn0083938
P15	2L	6740777	T	G	T>G	0.217	0.434	somaticsniper,strelka	upstream_gene_variant	intergenic	intergenic	intergenic
P15	2L	8351635	G	A	C>T	0.217	0.434	somaticsniper,strelka	upstream_gene_variant	intergenic	intergenic	intergenic
P15	2L	10423011	T	C	T>C	0.19	0.38	somaticsniper,strelka	upstream_gene_variant	intergenic	intergenic	intergenic
P15	2L	10749160	T	G	T>G	0.258	0.516	somaticsniper,strelka	intron_variant	intron	CG17124	FBgn0032297
P15	2L	14380351	A	T	T>A	0.184	0.368	somaticsniper,strelka	synonymous_variant	exon_3	ppk	FBgn0020258
P15	2L	14679219	A	T	T>A	0.0588	0.1176	mutect2,strelka	intron_variant	intron	osp	FBgn0003016
P15	2L	15272637	C	A	C>A	0.238	0.476	somaticsniper,strelka	upstream_gene_variant	intergenic	intergenic	intergenic
P15	2L	15272638	A	T	T>A	0.227	0.454	somaticsniper,strelka	upstream_gene_variant	intergenic	intergenic	intergenic
P15	2L	16583822	T	A	T>A	0.286	0.572	somaticsniper,strelka	intron_variant	intron	CG42389	FBgn0259735
P15	2L	22960333	G	A	C>T	0.122	0.244	somaticsniper,strelka	intergenic_region	intergenic	intergenic	intergenic
P15	2R	2688482	T	G	T>G	0.343	0.686	somaticsniper,strelka	intergenic_region	intergenic	intergenic	intergenic
P15	2R	12279169	G	T	C>A	0.278	0.556	somaticsniper,strelka	upstream_gene_variant	intergenic	intergenic	intergenic
P15	2R	12698452	A	G	T>C	0.167	0.334	varscan2,somaticsniper	upstream_gene_variant	intergenic	intergenic	intergenic
P15	2R	14419806	C	T	C>T	0.261	0.522	somaticsniper,strelka	upstream_gene_variant	intergenic	intergenic	intergenic
P15	2R	20432906	C	A	C>A	0.25	0.5	varscan2,somaticsniper	intron_variant	intron	CG12484	FBgn0086604
P15	2R	21118339	T	G	T>G	0.233	0.466	varscan2,somaticsniper	upstream_gene_variant	intron	ktub	FBgn0015721
P15	2R	24138467	C	G	C>G	0.171	0.342	somaticsniper,strelka	upstream_gene_variant	intergenic	intergenic	intergenic
P15	3L	2577967	T	A	T>A	0.288	0.576	mutect2,varscan2,somaticsniper,strelka,freebayes	intron_variant	intron	msn	FBgn0010909
P15	3L	2794027	T	C	T>C	0.2	0.4	varscan2,somaticsniper	synonymous_variant	exon_6	Tet	FBgn0263392
P15	3L	5271593	T	C	T>C	0.222	0.444	varscan2,somaticsniper	5_prime_UTR_variant	exon_1	shep	FBgn0052423
P15	3L	8919437	A	G	T>C	0.217	0.434	somaticsniper,strelka	downstream_gene_variant	intron	Tsp66E	FBgn0035936
P15	3L	10650707	A	C	T>G	0.19	0.38	somaticsniper,strelka	intron_variant	intron	CG32066	FBgn0052066
P15	3L	10650708	T	C	T>C	0.19	0.38	somaticsniper,strelka	intron_variant	intron	CG32066	FBgn0052066
P15	3L	11221453	G	A	C>T	0.308	0.616	varscan2,strelka	intron_variant	intron	CG42671	FBgn0261553
P15	3L	11404058	T	C	T>C	0.305	0.61	varscan2,somaticsniper,strelka,freebayes	upstream_gene_variant	intergenic	intergenic	intergenic
P15	3L	12883941	T	A	T>A	0.182	0.364	somaticsniper,strelka	upstream_gene_variant	intergenic	intergenic	intergenic
P15	3L	13677201	G	A	C>T	0.174	0.348	varscan2,somaticsniper	intron_variant	intron	bru3	FBgn0264001
P15	3R	2832995	C	A	C>A	0.25	0.5	mutect2,varscan2,somaticsniper,strelka,freebayes	intron_variant	intron	Pzl	FBgn0267430
P15	3R	8173050	C	T	C>T	0.075	0.15	mutect2,strelka	intron_variant	intron	grn	FBgn0001138
P15	3R	18303542	G	T	C>A	0.163	0.326	varscan2,somaticsniper	3_prime_UTR_variant	3UTR	PKD	FBgn0038603
P15	3R	22567794	A	T	T>A	0.167	0.334	somaticsniper,strelka	upstream_gene_variant	intergenic	intergenic	intergenic
P15	3R	22567795	C	T	C>T	0.167	0.334	somaticsniper,strelka	upstream_gene_variant	intergenic	intergenic	intergenic
P15	3R	25411528	C	T	C>T	0.222	0.444	varscan2,somaticsniper	intron_variant	intron	Fur1	FBgn0004509
P15	3R	29520868	G	T	C>A	0.245	0.49	varscan2,somaticsniper	downstream_gene_variant	intergenic	intergenic	intergenic
P15	3R	29957504	G	T	C>A	0.174	0.348	varscan2,somaticsniper	intron_variant	intron	TkR99D	FBgn0004622
P15	3R	30098451	G	A	C>T	0.333	0.666	mutect2,varscan2,somaticsniper,strelka,freebayes	upstream_gene_variant	intron	sima	FBgn0266411
P15	4	156511	G	C	C>G	0.19	0.38	somaticsniper,strelka	upstream_gene_variant	intergenic	intergenic	intergenic
P15	4	975262	T	C	T>C	0.0635	0.127	mutect2,strelka	5_prime_UTR_premature_start_codon_gain_variant	exon_1	sphinx	FBgn0083990
P15	X	5432326	T	C	T>C	0.182	0.182	varscan2,somaticsniper	synonymous_variant	exon	CG15784	FBgn0029766
P15	X	8802754	C	T	C>T	0.19	0.19	varscan2,somaticsniper	intron_variant	intron	Lim1	FBgn0026411
P15	X	16617402	T	G	T>G	0.308	0.308	somaticsniper,strelka	downstream_gene_variant	intron	CG9782	FBgn0030763
P15	X	17390772	T	C	T>C	0.37	0.37	freebayes	intergenic_region	intergenic	intergenic	intergenic
P15	X	19769703	T	C	T>C	0.429	0.429	somaticsniper,strelka	upstream_gene_variant	intron	zld	FBgn0259789
P15	Y	36242	G	T	C>A	0.478	0.478	somaticsniper,strelka	intron_variant	intron	kl-5	FBgn0267433
P23	2L	4648532	G	A	C>T	0.312	0.624	varscan2,somaticsniper	upstream_gene_variant	intergenic	intergenic	intergenic
P23	2L	5443111	A	C	T>G	0.318	0.636	freebayes	upstream_gene_variant	intergenic	intergenic	intergenic
P23	2L	9857697	G	A	C>T	0.278	0.556	varscan2,strelka	intron_variant	intron	nAChRalpha6	FBgn0032151
P23	2L	12409191	G	A	C>T	0.4	0.8	somaticsniper,strelka	upstream_gene_variant	intron	vir-1	FBgn0043841
P23	2L	17455354	A	C	T>G	0.167	0.334	varscan2,strelka	missense_variant	exon	SPH93	FBgn0032638
P23	2L	20483842	C	A	C>A	0.211	0.422	varscan2,somaticsniper	upstream_gene_variant	ncRNA	CR44980	FBgn0266315
P23	2R	1536378	G	T	C>A	0.31	0.62	somaticsniper,strelka	intergenic_region	intergenic	intergenic	intergenic
P23	2R	1536379	A	G	T>C	0.286	0.572	somaticsniper,strelka	intergenic_region	intergenic	intergenic	intergenic
P23	2R	7770236	A	C	T>G	0.273	0.546	somaticsniper,strelka	intron_variant	intron	CG45093	FBgn0266526
P23	2R	9327765	G	A	C>T	0.25	0.5	varscan2,somaticsniper	intron_variant	intron	CG13954	FBgn0033405
P23	2R	10200861	G	A	C>T	0.524	1	somaticsniper,strelka	upstream_gene_variant	intergenic	intergenic	intergenic
P23	2R	10200862	C	G	C>G	0.524	1	somaticsniper,strelka	upstream_gene_variant	intergenic	intergenic	intergenic
P23	2R	11393621	G	A	C>T	0.0889	0.1778	mutect2,strelka	upstream_gene_variant	intron	sprt	FBgn0082585
P23	2R	20468795	C	A	C>A	0.2	0.4	mutect2,strelka	splice_region_variant&intron_variant	intron	CG12484	FBgn0086604
P23	2R	22306292	T	C	T>C	0.167	0.334	mutect2,somaticsniper,strelka	upstream_gene_variant	intron	wdp	FBgn0034718
P23	2R	22382965	C	T	C>T	0.182	0.364	somaticsniper,strelka	upstream_gene_variant	intergenic	intergenic	intergenic
P23	3L	977042	C	A	C>A	0.167	0.334	somaticsniper,strelka	intron_variant	intron	Glut1	FBgn0264574
P23	3L	977043	C	A	C>A	0.167	0.334	somaticsniper,strelka	intron_variant	intron	Glut1	FBgn0264574
P23	3L	2836437	A	G	T>C	0.375	0.75	somaticsniper,strelka	intron_variant	intron	Tet	FBgn0263392
P23	3L	2855200	T	A	T>A	0.267	0.534	varscan2,somaticsniper	intron_variant	intron	Tet	FBgn0263392
P23	3L	4324657	A	T	T>A	0.667	1	somaticsniper,strelka	upstream_gene_variant	intron	Cip4	FBgn0035533
P23	3L	12445697	C	T	C>T	0.25	0.5	varscan2,somaticsniper	intergenic_region	intergenic	intergenic	intergenic
P23	3L	15972097	A	T	T>A	0.667	1	somaticsniper,strelka	upstream_gene_variant	intron	brm	FBgn0000212
P23	3L	19788051	A	G	T>C	0.182	0.364	somaticsniper,strelka	intron_variant	intron	Gyc76C	FBgn0266136
P23	3L	20670578	C	T	C>T	0.19	0.38	mutect2,somaticsniper,strelka	intergenic_region	intergenic	intergenic	intergenic
P23	3L	21994294	T	A	T>A	0.15	0.3	mutect2,strelka	intergenic_region	intergenic	intergenic	intergenic
P23	3L	24709680	C	T	C>T	0.324	0.648	somaticsniper,strelka	intergenic_region	intergenic	intergenic	intergenic
P23	3R	2181561	C	G	C>G	0.222	0.444	somaticsniper,strelka	intron_variant	intron	Myo81F	FBgn0267431
P23	3R	6307523	A	G	T>C	0.222	0.444	somaticsniper,strelka	missense_variant	exon	CG46026	FBgn0267690
P23	3R	8133550	A	G	T>C	0.136	0.272	mutect2,strelka	downstream_gene_variant	intergenic	intergenic	intergenic
P23	3R	9134153	A	C	T>G	0.333	0.666	somaticsniper,strelka	intron_variant	intron	pum	FBgn0003165
P23	3R	13820282	T	G	T>G	0.207	0.414	somaticsniper,strelka	downstream_gene_variant	intergenic	intergenic	intergenic
P23	3R	26552085	A	T	T>A	0.267	0.534	somaticsniper,strelka	intron_variant	intron	scrib	FBgn0263289
P23	3R	31363007	A	G	T>C	0.222	0.444	mutect2,somaticsniper,strelka	intron_variant	intron	CG34347	FBgn0085376
P23	X	2910932	T	A	T>A	0.667	0.667	somaticsniper,strelka	intron_variant	intron	kirre	FBgn0028369
P23	X	8369603	G	C	C>G	0.238	0.238	somaticsniper,strelka	upstream_gene_variant	intergenic	intergenic	intergenic
P23	X	10598380	G	A	C>T	1	1	somaticsniper,strelka,freebayes	missense_variant	3UTR	CG1628	FBgn0030218
P25	2L	516508	G	A	C>T	0.19	0.38	varscan2,somaticsniper	intron_variant	intron	ush	FBgn0003963
P25	2L	2735627	T	C	T>C	0.267	0.534	freebayes	upstream_gene_variant	intron	CG31689	FBgn0031449
P25	2L	2873547	C	A	C>A	0.5	1	somaticsniper,strelka	upstream_gene_variant	intron	CG31694	FBgn0051694
P25	2L	3180979	T	A	T>A	0.333	0.666	varscan2,somaticsniper	intron_variant	intron	CG34393	FBgn0085422
P25	2L	6011141	G	T	C>A	0.115	0.23	mutect2,strelka	5_prime_UTR_variant	exon_1	CG9098	FBgn0031762
P25	2L	6872116	C	A	C>A	0.158	0.316	mutect2,strelka	splice_region_variant&non_coding_transcript_exon_variant	exon_1	CR44915	FBgn0266220
P25	2L	7007774	T	C	T>C	0.22	0.44	varscan2,somaticsniper	upstream_gene_variant	intron	uif	FBgn0031879
P25	2L	7152851	T	G	T>G	0.378	0.756	somaticsniper,strelka	intron_variant	intron	Pvf3	FBgn0085407
P25	2L	12053113	C	A	C>A	0.538	1	somaticsniper,strelka	upstream_gene_variant	intron	JhI-21	FBgn0028425
P25	2L	12053114	C	G	C>G	0.538	1	somaticsniper,strelka	upstream_gene_variant	intron	JhI-21	FBgn0028425
P25	2L	12959242	C	A	C>A	0.292	0.584	varscan2,somaticsniper	intergenic_region	intergenic	intergenic	intergenic
P25	2L	14359136	T	A	T>A	0.474	0.948	somaticsniper,strelka	upstream_gene_variant	intergenic	intergenic	intergenic
P25	2L	14359137	T	C	T>C	0.474	0.948	somaticsniper,strelka	upstream_gene_variant	intergenic	intergenic	intergenic
P25	2L	15068757	T	C	T>C	0.211	0.422	somaticsniper,strelka	missense_variant	intron	vig	FBgn0024183
P25	2L	15812865	G	A	C>T	0.25	0.5	somaticsniper,strelka	upstream_gene_variant	intergenic	intergenic	intergenic
P25	2R	3205413	G	A	C>T	0.222	0.444	somaticsniper,strelka	intergenic_region	intergenic	intergenic	intergenic
P25	2R	3205435	C	A	C>A	0.2	0.4	somaticsniper,strelka	intergenic_region	intergenic	intergenic	intergenic
P25	2R	4848290	T	C	T>C	0.385	0.77	somaticsniper,strelka	intergenic_region	intergenic	intergenic	intergenic
P25	2R	5430951	C	G	C>G	0.6	1	somaticsniper,strelka	intron_variant	intron	laccase2	FBgn0259247
P25	2R	8634455	G	A	C>T	0.304	0.608	somaticsniper,strelka	upstream_gene_variant	intergenic	intergenic	intergenic
P25	2R	12296479	G	C	C>G	0.364	0.728	somaticsniper,strelka	downstream_gene_variant	intron	CG42700	FBgn0261611
P25	2R	12320872	T	C	T>C	0.231	0.462	somaticsniper,strelka	splice_region_variant&intron_variant	ncRNA	CR44316	FBgn0265375
P25	2R	12402463	C	A	C>A	0.3	0.6	somaticsniper,strelka	upstream_gene_variant	intron	Cpr49Ae	FBgn0033728
P25	2R	12564341	T	C	T>C	0.143	0.286	mutect2,strelka	synonymous_variant	exon	CG33775	FBgn0053775
P25	2R	14383792	A	T	T>A	0.167	0.334	mutect2,somaticsniper,strelka	intron_variant	intron	Dh44-R1	FBgn0033932
P25	2R	19792556	T	C	T>C	0.227	0.454	varscan2,somaticsniper	downstream_gene_variant	intergenic	intergenic	intergenic
P25	2R	25072696	G	T	C>A	0.294	0.588	somaticsniper,strelka	3_prime_UTR_variant	3UTR	gol	FBgn0004919
P25	2R	25072697	G	C	C>G	0.294	0.588	somaticsniper,strelka	3_prime_UTR_variant	3UTR	gol	FBgn0004919
P25	3L	934360	G	A	C>T	0.231	0.462	varscan2,somaticsniper	intron_variant	intron	Glut1	FBgn0264574
P25	3L	2221376	C	T	C>T	0.217	0.434	somaticsniper,strelka	intergenic_region	intergenic	intergenic	intergenic
P25	3L	3440073	T	C	T>C	0.25	0.5	somaticsniper,strelka	intron_variant	intron	eIF5B	FBgn0026259
P25	3L	4656913	A	C	T>G	0.261	0.522	somaticsniper,strelka	downstream_gene_variant	intron	axo	FBgn0262870
P25	3L	5297914	A	T	T>A	0.263	0.526	mutect2,strelka	intergenic_region	intergenic	intergenic	intergenic
P25	3L	6233360	C	A	C>A	0.267	0.534	freebayes	5_prime_UTR_variant	exon_1	BG642312	FBgn0047334
P25	3L	8845652	T	G	T>G	0.208	0.416	somaticsniper,strelka	intron_variant	ncRNA	CR45823	FBgn0267473
P25	3L	12230195	A	G	T>C	0.12	0.24	mutect2,strelka	intron_variant	intron	app	FBgn0260941
P25	3L	12481150	G	A	C>T	0.174	0.348	somaticsniper,strelka	upstream_gene_variant	intron	CG10663	FBgn0036287
P25	3L	12687404	T	A	T>A	0.176	0.352	varscan2,somaticsniper	intergenic_region	intergenic	intergenic	intergenic
P25	3L	13256550	G	T	C>A	0.2	0.4	varscan2,somaticsniper	intron_variant	intron	caps	FBgn0023095
P25	3L	15343752	A	T	T>A	0.214	0.428	mutect2,somaticsniper,strelka	3_prime_UTR_variant	3UTR	Toll-6	FBgn0036494
P25	3L	16310045	T	G	T>G	0.222	0.444	somaticsniper,strelka	upstream_gene_variant	exon_2	CR32160	FBgn0052160
P25	3L	18433287	C	T	C>T	0.213	0.426	varscan2,somaticsniper	intergenic_region	intergenic	intergenic	intergenic
P25	3L	18433290	T	G	T>G	0.213	0.426	varscan2,somaticsniper	intergenic_region	intergenic	intergenic	intergenic
P25	3L	18690891	A	G	T>C	0.25	0.5	somaticsniper,strelka	upstream_gene_variant	intergenic	intergenic	intergenic
P25	3L	20061730	T	A	T>A	0.2	0.4	mutect2,strelka	intron_variant	intron	sNPF-R	FBgn0036934
P25	3L	20724721	A	G	T>C	0.136	0.272	mutect2,strelka	downstream_gene_variant	intergenic	intergenic	intergenic
P25	3L	23064580	G	A	C>T	0.191	0.382	somaticsniper,strelka	intergenic_region	intergenic	intergenic	intergenic
P25	3R	4592847	T	G	T>G	0.25	0.5	somaticsniper,strelka	upstream_gene_variant	intergenic	intergenic	intergenic
P25	3R	4592848	T	G	T>G	0.25	0.5	somaticsniper,strelka	upstream_gene_variant	intergenic	intergenic	intergenic
P25	3R	8540072	T	A	T>A	0.172	0.344	mutect2,somaticsniper,strelka	intergenic_region	intergenic	intergenic	intergenic
P25	3R	13938417	T	C	T>C	0.182	0.364	somaticsniper,strelka	downstream_gene_variant	intergenic	intergenic	intergenic
P25	3R	14353463	C	T	C>T	0.16	0.32	somaticsniper,strelka	downstream_gene_variant	intron	NK7.1	FBgn0024321
P25	3R	20101118	A	G	T>C	0.267	0.534	freebayes	intergenic_region	intergenic	intergenic	intergenic
P25	3R	20702288	C	T	C>T	0.158	0.316	mutect2,strelka	intron_variant	intron	Oamb	FBgn0024944
P25	X	3067157	T	A	T>A	0.231	0.231	somaticsniper,strelka	missense_variant	exon	CG4116	FBgn0029649
P25	X	4904555	A	T	T>A	0.231	0.231	mutect2,varscan2,somaticsniper,strelka	missense_variant	exon	CG42594	FBgn0260971
P25	X	6285515	C	G	C>G	0.227	0.227	somaticsniper,strelka	missense_variant	exon_3	Top3beta	FBgn0026015
P25	X	11211689	T	C	T>C	0.214	0.214	somaticsniper,strelka	intergenic_region	intergenic	intergenic	intergenic
P25	X	22829279	T	C	T>C	0.211	0.211	mutect2,somaticsniper,strelka	splice_acceptor_variant&intron_variant	intron	fog	FBgn0000719
P27	2L	4116693	G	A	C>T	0.185	0.37	varscan2,somaticsniper	upstream_gene_variant	intergenic	intergenic	intergenic
P27	2L	4555748	T	A	T>A	0.0843	0.1686	mutect2,strelka	missense_variant	exon_8	dpy	FBgn0053196
P27	2L	6593489	T	C	T>C	0.22	0.44	somaticsniper,strelka	intron_variant	intron	CG11319	FBgn0031835
P27	2L	10457222	G	A	C>T	0.452	0.904	somaticsniper,strelka	5_prime_UTR_variant	exon_1	LManI	FBgn0032253
P27	2L	10457223	G	A	C>T	0.455	0.91	somaticsniper,strelka	5_prime_UTR_variant	exon_1	LManI	FBgn0032253
P27	2L	16026080	G	T	C>A	0.238	0.476	mutect2,varscan2,somaticsniper,strelka,freebayes	intron_variant	intron	beat-Ic	FBgn0028644
P27	2L	18633458	G	T	C>A	0.25	0.5	somaticsniper,strelka	intron_variant	intron	MESR3	FBgn0032694
P27	2L	19518932	T	A	T>A	0.286	0.572	somaticsniper,strelka	5_prime_UTR_variant	exon_1	CG10132	FBgn0032798
P27	2R	4874728	G	C	C>G	0.169	0.338	somaticsniper,strelka	intergenic_region	intergenic	intergenic	intergenic
P27	2R	7096140	C	T	C>T	0.137	0.274	varscan2,somaticsniper	upstream_gene_variant	intron	esn	FBgn0263934
P27	2R	7457758	A	T	T>A	0.235	0.47	varscan2,somaticsniper	downstream_gene_variant	intron	Inos	FBgn0025885
P27	2R	12296479	G	C	C>G	0.281	0.562	somaticsniper,strelka	downstream_gene_variant	intron	CG42700	FBgn0261611
P27	2R	21602229	G	A	C>T	0.176	0.352	varscan2,somaticsniper	downstream_gene_variant	intergenic	intergenic	intergenic
P27	3L	3887801	G	A	C>T	0.212	0.424	somaticsniper,strelka	upstream_gene_variant	intergenic	intergenic	intergenic
P27	3L	3887804	C	T	C>T	0.243	0.486	somaticsniper,strelka	upstream_gene_variant	intergenic	intergenic	intergenic
P27	3L	4897994	T	C	T>C	0.281	0.562	somaticsniper,strelka	synonymous_variant	exon	CG13705	FBgn0035582
P27	3L	4898009	C	T	C>T	0.219	0.438	somaticsniper,strelka	synonymous_variant	exon	CG13705	FBgn0035582
P27	3L	7360880	T	C	T>C	0.169	0.338	varscan2,somaticsniper	5_prime_UTR_variant	5UTR	Sec63	FBgn0035771
P27	3L	16249371	G	T	C>A	0.158	0.316	varscan2,somaticsniper	downstream_gene_variant	intergenic	intergenic	intergenic
P27	3L	20086268	G	A	C>T	0.21	0.42	varscan2,somaticsniper	intron_variant	intron	sNPF-R	FBgn0036934
P27	3L	21785107	A	T	T>A	0.163	0.326	varscan2,somaticsniper	intergenic_region	intergenic	intergenic	intergenic
P27	3R	834683	C	A	C>A	0.109	0.218	mutect2,strelka	upstream_gene_variant	intron	Myo81F	FBgn0267431
P27	3R	13467370	C	T	C>T	0.265	0.53	mutect2,varscan2,somaticsniper,strelka,freebayes	upstream_gene_variant	intergenic	intergenic	intergenic
P27	3R	13896081	C	T	C>T	0.06	0.12	mutect2,strelka	intergenic_region	intergenic	intergenic	intergenic
P27	3R	15450134	G	T	C>A	0.326	0.652	somaticsniper,strelka	intron_variant	intron	AdamTS-A	FBgn0038341
P27	3R	22862444	T	C	T>C	0.111	0.222	mutect2,strelka	intergenic_region	intergenic	intergenic	intergenic
P27	3R	23358775	G	A	C>T	0.132	0.264	mutect2,strelka	upstream_gene_variant	intergenic	intergenic	intergenic
P27	3R	29305933	T	C	T>C	0.156	0.312	varscan2,somaticsniper,strelka	intergenic_region	intergenic	intergenic	intergenic
P27	3R	30264347	T	C	T>C	0.162	0.324	somaticsniper,strelka	intergenic_region	intergenic	intergenic	intergenic
P27	3R	31152358	C	A	C>A	0.225	0.45	somaticsniper,strelka	intron_variant	intron	Gycbeta100B	FBgn0013973
P27	X	2585288	C	A	C>A	0.243	0.243	mutect2,varscan2,somaticsniper,strelka,freebayes	5_prime_UTR_variant	5UTR	CG13760	FBgn0040375
P27	X	13657311	C	T	C>T	0.19	0.19	somaticsniper,strelka	intron_variant	intron	NFAT	FBgn0030505
P27	Y	403096	C	T	C>T	0.333	0.333	somaticsniper,strelka	intron_variant	intron	kl-3	FBgn0267432
P29	2L	390718	T	C	T>C	0.0727	0.1454	mutect2,strelka	downstream_gene_variant	intergenic	intergenic	intergenic
P29	2L	3419313	C	G	C>G	0.158	0.316	mutect2,strelka	downstream_gene_variant	intron	pgant2	FBgn0031530
P29	2L	5814735	A	G	T>C	0.3	0.6	somaticsniper,strelka	downstream_gene_variant	intergenic	intergenic	intergenic
P29	2L	8622803	C	G	C>G	0.149	0.298	somaticsniper,strelka	downstream_gene_variant	intron	Sema-1a	FBgn0011259
P29	2L	10918683	A	T	T>A	0.159	0.318	somaticsniper,strelka	intron_variant	intron	dpr2	FBgn0261871
P29	2L	16410528	T	A	T>A	0.182	0.364	somaticsniper,strelka	upstream_gene_variant	intron	CG5888	FBgn0028523
P29	2L	17607549	T	C	T>C	0.188	0.376	somaticsniper,strelka	upstream_gene_variant	intergenic	intergenic	intergenic
P29	2L	18347767	G	A	C>T	0.316	0.632	mutect2,varscan2,somaticsniper,strelka,freebayes	intron_variant	intron	Fas3	FBgn0000636
P29	2L	19129313	G	T	C>A	0.194	0.388	somaticsniper,strelka	3_prime_UTR_variant	3UTR	l(2)37Cd	FBgn0086445
P29	2L	22107432	C	G	C>G	0.167	0.334	somaticsniper,strelka	upstream_gene_variant	intergenic	intergenic	intergenic
P29	2R	8627688	A	T	T>A	0.243	0.486	somaticsniper,strelka	upstream_gene_variant	intergenic	intergenic	intergenic
P29	2R	8813412	A	T	T>A	0.276	0.552	somaticsniper,strelka	intron_variant	intron	sns	FBgn0024189
P29	2R	9782736	A	T	T>A	0.192	0.384	somaticsniper,strelka	intron_variant	intron	CG1688	FBgn0027589
P29	2R	12801105	C	T	C>T	0.233	0.466	somaticsniper,strelka	3_prime_UTR_variant	3UTR	sca	FBgn0003326
P29	2R	13576507	A	G	T>C	0.424	0.848	somaticsniper,strelka	upstream_gene_variant	ncRNA	CR44365	FBgn0265496
P29	2R	20761136	C	A	C>A	0.31	0.62	somaticsniper,strelka	intergenic_region	intergenic	intergenic	intergenic
P29	2R	20838317	C	G	C>G	0.179	0.358	varscan2,somaticsniper	upstream_gene_variant	exon_2	CR44667	FBgn0265878
P29	3L	3638608	T	A	T>A	0.2	0.4	somaticsniper,strelka	intron_variant	intron	dar1	FBgn0263239
P29	3L	4299335	T	A	T>A	0.179	0.358	somaticsniper,strelka	intron_variant	intron	dyl	FBgn0066365
P29	3L	5280621	T	A	T>A	0.318	0.636	somaticsniper,strelka	upstream_gene_variant	intergenic	intergenic	intergenic
P29	3L	6155113	T	C	T>C	0.208	0.416	varscan2,somaticsniper	upstream_gene_variant	exon_1	CR45421	FBgn0266970
P29	3L	6310103	G	T	C>A	0.136	0.272	mutect2,strelka	upstream_gene_variant	intergenic	intergenic	intergenic
P29	3L	8733232	G	A	C>T	0.194	0.388	somaticsniper,strelka	3_prime_UTR_variant	3UTR	Prm	FBgn0003149
P29	3L	9068484	C	A	C>A	0.294	0.588	somaticsniper,strelka	3_prime_UTR_variant	3UTR	CG4911	FBgn0035959
P29	3L	9068485	G	T	C>A	0.286	0.572	somaticsniper,strelka	3_prime_UTR_variant	3UTR	CG4911	FBgn0035959
P29	3L	9068486	A	T	T>A	0.286	0.572	somaticsniper,strelka	3_prime_UTR_variant	3UTR	CG4911	FBgn0035959
P29	3L	9897096	A	G	T>C	0.3	0.6	somaticsniper,strelka	upstream_gene_variant	intron	CG6707	FBgn0036058
P29	3L	10656206	G	A	C>T	0.192	0.384	somaticsniper,strelka	intron_variant	intron	CG32066	FBgn0052066
P29	3L	10656207	C	T	C>T	0.222	0.444	somaticsniper,strelka	intron_variant	intron	CG32066	FBgn0052066
P29	3L	12481140	A	C	T>G	0.102	0.204	varscan2,strelka	upstream_gene_variant	intron	CG10663	FBgn0036287
P29	3L	16269726	T	C	T>C	0.2	0.4	somaticsniper,strelka	synonymous_variant	exon	CG13068	FBgn0036588
P29	3L	16461727	A	T	T>A	0.235	0.47	somaticsniper,strelka	intron_variant	intron	CG33158	FBgn0053158
P29	3L	17948928	A	T	T>A	0.231	0.462	mutect2,somaticsniper,strelka	upstream_gene_variant	intergenic	intergenic	intergenic
P29	3L	18142269	C	T	C>T	0.18	0.36	varscan2,somaticsniper	intron_variant	intron	geko	FBgn0020300
P29	3L	18411901	C	T	C>T	0.28	0.56	varscan2,somaticsniper,strelka	intergenic_region	intergenic	intergenic	intergenic
P29	3L	19217917	C	A	C>A	0.324	0.648	mutect2,varscan2,somaticsniper,strelka,freebayes	intron_variant	intron	fz2	FBgn0016797
P29	3L	19251089	C	A	C>A	0.179	0.358	varscan2,somaticsniper	upstream_gene_variant	intergenic	intergenic	intergenic
P29	3L	19891996	C	T	C>T	0.0465	0.093	mutect2,strelka	missense_variant	exon	Su(Tpl)	FBgn0014037
P29	3L	22822781	C	T	C>T	0.359	0.718	mutect2,varscan2,somaticsniper,strelka,freebayes	intron_variant	intron	jim	FBgn0027339
P29	3L	25162708	G	A	C>T	0.2	0.4	somaticsniper,strelka	intergenic_region	intergenic	intergenic	intergenic
P29	3L	25798097	C	G	C>G	0.203	0.406	somaticsniper,strelka	downstream_gene_variant	intergenic	intergenic	intergenic
P29	3R	7525389	C	T	C>T	0.0656	0.1312	mutect2,strelka	missense_variant	exon_2	alpha-Est6	FBgn0015574
P29	3R	10570716	T	A	T>A	0.467	0.934	mutect2,varscan2,somaticsniper,strelka,freebayes	intron_variant	intron	hth	FBgn0001235
P29	3R	11476493	G	T	C>A	0.0897	0.1794	mutect2,strelka	intergenic_region	intergenic	intergenic	intergenic
P29	3R	13279634	A	C	T>G	0.192	0.384	varscan2,somaticsniper	upstream_gene_variant	intergenic	intergenic	intergenic
P29	3R	13971969	C	T	C>T	0.25	0.5	varscan2,somaticsniper	upstream_gene_variant	exon_1	CR43460	FBgn0263414
P29	3R	18069576	T	C	T>C	0.171	0.342	freebayes	intergenic_region	intergenic	intergenic	intergenic
P29	3R	21419703	T	A	T>A	0.308	0.616	varscan2,somaticsniper	intron_variant	intron	lbl	FBgn0008651
P29	3R	23912632	T	G	T>G	0.211	0.422	somaticsniper,strelka	intron_variant	intron	sba	FBgn0016754
P29	3R	24590471	A	T	T>A	0.0962	0.1924	mutect2,strelka	intron_variant	intron	mld	FBgn0263490
P29	3R	30088196	G	A	C>T	0.207	0.414	varscan2,somaticsniper	intron_variant	intron	sima	FBgn0266411
P29	4	976701	C	A	C>A	0.417	0.834	somaticsniper,strelka	upstream_gene_variant	ncRNA	sphinx	FBgn0083990
P29	4	976720	C	A	C>A	0.357	0.714	somaticsniper,strelka	upstream_gene_variant	ncRNA	sphinx	FBgn0083990
P29	4	976723	T	C	T>C	0.333	0.666	somaticsniper,strelka	upstream_gene_variant	ncRNA	sphinx	FBgn0083990
P29	4	976748	A	C	T>G	0.312	0.624	somaticsniper,strelka	upstream_gene_variant	ncRNA	sphinx	FBgn0083990
P29	X	5485618	T	C	T>C	0.25	0.25	varscan2,somaticsniper	intron_variant	intron	SPR	FBgn0029768
P29	X	6966242	A	G	T>C	0.13	0.13	mutect2,strelka	3_prime_UTR_variant	intron	CG32732	FBgn0052732
P29	X	9745020	T	A	T>A	0.25	0.25	varscan2,somaticsniper	intron_variant	intron	Sp1	FBgn0020378
P29	X	9745021	T	C	T>C	0.235	0.235	varscan2,somaticsniper	intron_variant	intron	Sp1	FBgn0020378
P29	X	14839671	C	G	C>G	0.684	0.684	varscan2,somaticsniper,strelka	upstream_gene_variant	intron	Flo2	FBgn0264078
P29	X	14839672	C	T	C>T	0.667	0.667	varscan2,somaticsniper,strelka	upstream_gene_variant	intron	Flo2	FBgn0264078
P29	X	16136302	T	G	T>G	0.25	0.25	somaticsniper,strelka	intron_variant	intron	disco-r	FBgn0042650
P29	X	20270790	A	T	T>A	0.294	0.294	varscan2,somaticsniper	upstream_gene_variant	intergenic	intergenic	intergenic
P31	2L	764192	G	A	C>T	0.286	0.572	varscan2,somaticsniper	downstream_gene_variant	intergenic	intergenic	intergenic
P31	2L	3819082	C	A	C>A	0.24	0.48	somaticsniper,strelka	downstream_gene_variant	intergenic	intergenic	intergenic
P31	2L	4043305	T	C	T>C	0.153	0.306	mutect2,somaticsniper,strelka	intron_variant	intron	ed	FBgn0000547
P31	2L	7132795	C	T	C>T	0.152	0.304	varscan2,somaticsniper	missense_variant	exon_1	Pvf3	FBgn0085407
P31	2L	10693694	G	A	C>T	0.5	1	somaticsniper,strelka	missense_variant	exon	CG17108	FBgn0032285
P31	2L	10693695	A	T	T>A	0.5	1	somaticsniper,strelka	synonymous_variant	exon	CG17108	FBgn0032285
P31	2L	15916970	G	C	C>G	0.281	0.562	mutect2,varscan2,somaticsniper,strelka,freebayes	synonymous_variant	exon_1	CG13244	FBgn0032577
P31	2L	18402727	G	T	C>A	0.276	0.552	somaticsniper,strelka	upstream_gene_variant	intergenic	intergenic	intergenic
P31	2L	18402728	T	G	T>G	0.276	0.552	somaticsniper,strelka	upstream_gene_variant	intergenic	intergenic	intergenic
P31	2L	22241818	A	T	T>A	0.25	0.5	somaticsniper,strelka	3_prime_UTR_variant	3UTR	CG3262	FBgn0032986
P31	2L	23174994	C	A	C>A	0.314	0.628	mutect2,varscan2,somaticsniper,strelka,freebayes	upstream_gene_variant	intergenic	intergenic	intergenic
P31	2R	4947068	G	A	C>T	0.353	0.706	mutect2,varscan2,somaticsniper,strelka,freebayes	intron_variant	intron	Ir41a	FBgn0040849
P31	2R	10293202	C	T	C>T	0.174	0.348	somaticsniper,strelka	intron_variant	intron	CAP	FBgn0033504
P31	2R	10293205	T	A	T>A	0.167	0.334	somaticsniper,strelka	intron_variant	intron	CAP	FBgn0033504
P31	2R	16639515	T	A	T>A	0.167	0.334	somaticsniper,strelka	upstream_gene_variant	intron	Alk	FBgn0040505
P31	2R	23296327	G	A	C>T	0.296	0.592	varscan2,somaticsniper	upstream_gene_variant	intergenic	intergenic	intergenic
P31	3L	1279853	A	T	T>A	0.119	0.238	varscan2,strelka	intron_variant	intron	CG32333	FBgn0052333
P31	3L	4656913	A	C	T>G	0.219	0.438	somaticsniper,strelka	downstream_gene_variant	intron	axo	FBgn0262870
P31	3L	5483177	G	A	C>T	0.278	0.556	somaticsniper,strelka	synonymous_variant	exon	CG4835	FBgn0035607
P31	3L	9916049	T	C	T>C	0.25	0.5	varscan2,somaticsniper	intron_variant	intron	CG34356	FBgn0085385
P31	3L	12418072	T	G	T>G	0.176	0.352	freebayes	upstream_gene_variant	intergenic	intergenic	intergenic
P31	3L	16461727	A	T	T>A	0.222	0.444	somaticsniper,strelka	intron_variant	intron	CG33158	FBgn0053158
P31	3L	20218934	A	G	T>C	0.0816	0.1632	mutect2,strelka	missense_variant	exon	CG6933	FBgn0036952
P31	3L	21141469	T	G	T>G	0.242	0.484	somaticsniper,strelka	intron_variant	intron	Ac78C	FBgn0024150
P31	3R	14048319	C	T	C>T	0.375	0.75	somaticsniper,strelka	upstream_gene_variant	intergenic	intergenic	intergenic
P31	3R	17463237	G	C	C>G	0.25	0.5	somaticsniper,strelka	intergenic_region	intergenic	intergenic	intergenic
P31	3R	19603656	A	G	T>C	0.478	0.956	somaticsniper,strelka	upstream_gene_variant	intron	CG7342	FBgn0038716
P31	3R	20830945	A	T	T>A	0.364	0.728	varscan2,somaticsniper	upstream_gene_variant	intergenic	intergenic	intergenic
P31	3R	21792317	T	G	T>G	0.282	0.564	somaticsniper,strelka	intron_variant	intron	CASK	FBgn0013759
P31	3R	23298545	C	T	C>T	0.176	0.352	varscan2,somaticsniper	upstream_gene_variant	intron	pnt	FBgn0003118
P31	3R	23298546	T	A	T>A	0.171	0.342	varscan2,somaticsniper	upstream_gene_variant	intron	pnt	FBgn0003118
P31	X	9745016	G	T	C>A	0.306	0.306	varscan2,somaticsniper	intron_variant	intron	Sp1	FBgn0020378
P31	X	9745020	T	A	T>A	0.176	0.176	varscan2,somaticsniper	intron_variant	intron	Sp1	FBgn0020378
P31	X	9745021	T	C	T>C	0.176	0.176	varscan2,somaticsniper	intron_variant	intron	Sp1	FBgn0020378
P33	2L	2044501	C	T	C>T	0.0811	0.1622	mutect2,strelka	upstream_gene_variant	intergenic	intergenic	intergenic
P33	2L	2716743	A	T	T>A	0.333	0.666	somaticsniper,strelka	intron_variant	intron	CG31690	FBgn0051690
P33	2L	2722009	T	C	T>C	0.0833	0.1666	mutect2,strelka	upstream_gene_variant	intergenic	intergenic	intergenic
P33	2L	4739401	G	T	C>A	0.0595	0.119	mutect2,strelka	upstream_gene_variant	intron	CG15630	FBgn0031627
P33	2L	4807012	A	C	T>G	0.156	0.312	somaticsniper,strelka	downstream_gene_variant	intergenic	intergenic	intergenic
P33	2L	6513516	T	G	T>G	0.0857	0.1714	mutect2,strelka	intron_variant	intron	CG31637	FBgn0051637
P33	2L	8351635	G	A	C>T	0.167	0.334	somaticsniper,strelka	upstream_gene_variant	intergenic	intergenic	intergenic
P33	2L	13293349	T	C	T>C	0.192	0.384	somaticsniper,strelka	3_prime_UTR_variant	3UTR	CG16824	FBgn0040973
P33	2L	13293350	G	A	C>T	0.218	0.436	somaticsniper,strelka	3_prime_UTR_variant	3UTR	CG16824	FBgn0040973
P33	2L	15054949	T	A	T>A	0.152	0.304	somaticsniper,strelka	upstream_gene_variant	intron	ck	FBgn0000317
P33	2L	15639579	G	C	C>G	0.0923	0.1846	mutect2,strelka	downstream_gene_variant	intergenic	intergenic	intergenic
P33	2L	16232756	G	A	C>T	0.278	0.556	somaticsniper,strelka	intron_variant	intron	CG42817	FBgn0261999
P33	2L	18207231	G	A	C>T	0.0851	0.1702	mutect2,strelka	downstream_gene_variant	intron	CG42750	FBgn0261804
P33	2L	18675657	T	A	T>A	0.203	0.406	somaticsniper,strelka	missense_variant	exon_3	Mst36Fa	FBgn0086681
P33	2L	19024083	T	C	T>C	0.178	0.356	somaticsniper,strelka	upstream_gene_variant	exon_1	CR43700	FBgn0263838
P33	2L	22200551	C	T	C>T	0.349	0.698	somaticsniper,strelka	upstream_gene_variant	intron	Ir40a	FBgn0259683
P33	2R	5724886	A	G	T>C	0.389	0.778	somaticsniper,strelka	intron_variant	intron	ap	FBgn0267978
P33	2R	7759715	T	A	T>A	0.235	0.47	somaticsniper,strelka	upstream_gene_variant	intron	CG45093	FBgn0266526
P33	2R	11574514	A	G	T>C	0.0635	0.127	mutect2,strelka	downstream_gene_variant	intergenic	intergenic	intergenic
P33	2R	12895751	A	G	T>C	0.267	0.534	varscan2,somaticsniper	intron_variant	intron	vg	FBgn0003975
P33	2R	14419806	C	T	C>T	0.237	0.474	somaticsniper,strelka	upstream_gene_variant	intergenic	intergenic	intergenic
P33	2R	15234663	A	T	T>A	0.235	0.47	varscan2,somaticsniper	missense_variant	exon_5	Fs	FBgn0259878
P33	2R	16411661	A	C	T>G	0.277	0.554	somaticsniper,strelka	downstream_gene_variant	intron	Sema-2b	FBgn0264273
P33	2R	19063017	G	A	C>T	0.147	0.294	somaticsniper,strelka	upstream_gene_variant	intergenic	intergenic	intergenic
P33	2R	21367323	G	A	C>T	0.196	0.392	somaticsniper,strelka	intron_variant	intron	cv-2	FBgn0000395
P33	2R	22293214	G	C	C>G	0.1	0.2	mutect2,strelka	upstream_gene_variant	intergenic	intergenic	intergenic
P33	3L	531767	A	C	T>G	0.182	0.364	somaticsniper,strelka	downstream_gene_variant	intron	klar	FBgn0001316
P33	3L	661619	A	G	T>C	0.244	0.488	varscan2,somaticsniper	downstream_gene_variant	intergenic	intergenic	intergenic
P33	3L	1420731	T	A	T>A	0.214	0.428	somaticsniper,strelka	downstream_gene_variant	intron	Ptp61F	FBgn0267487
P33	3L	3926765	C	T	C>T	0.257	0.514	somaticsniper,strelka	upstream_gene_variant	intron	Eip63F-1	FBgn0004910
P33	3L	6829938	G	T	C>A	0.2	0.4	varscan2,somaticsniper	intergenic_region	intergenic	intergenic	intergenic
P33	3L	8669745	T	G	T>G	0.163	0.326	somaticsniper,strelka	intergenic_region	intergenic	intergenic	intergenic
P33	3L	9216988	A	C	T>G	0.167	0.334	somaticsniper,strelka	downstream_gene_variant	intergenic	intergenic	intergenic
P33	3L	9216998	A	C	T>G	0.179	0.358	somaticsniper,strelka	downstream_gene_variant	intergenic	intergenic	intergenic
P33	3L	9216999	A	T	T>A	0.179	0.358	somaticsniper,strelka	downstream_gene_variant	intergenic	intergenic	intergenic
P33	3L	12310996	T	C	T>C	0.233	0.466	varscan2,somaticsniper,strelka	intron_variant	intron	CG44355	FBgn0265455
P33	3L	15658207	A	G	T>C	0.25	0.5	somaticsniper,strelka	upstream_gene_variant	intergenic	intergenic	intergenic
P33	3L	20454270	T	C	T>C	0.265	0.53	somaticsniper,strelka	upstream_gene_variant	snoRNA	snoRNA:Me18S-U1356b	FBgn0082948
P33	3L	20454274	A	C	T>G	0.277	0.554	varscan2,somaticsniper,strelka	upstream_gene_variant	snoRNA	snoRNA:Me18S-U1356b	FBgn0082948
P33	3R	11628045	C	A	C>A	0.371	0.742	mutect2,varscan2,somaticsniper,strelka,freebayes	missense_variant	exon_2	CG18764	FBgn0042205
P33	3R	11834732	G	C	C>G	0.0758	0.1516	mutect2,strelka	intron_variant	intron	CG6959	FBgn0037956
P33	3R	12167774	A	C	T>G	0.0893	0.1786	mutect2,strelka	upstream_gene_variant	intergenic	intergenic	intergenic
P33	3R	16200637	A	C	T>G	0.226	0.452	somaticsniper,strelka	upstream_gene_variant	intron	CG6126	FBgn0038407
P33	3R	18232694	A	T	T>A	0.244	0.488	somaticsniper,strelka	upstream_gene_variant	intergenic	intergenic	intergenic
P33	3R	18359277	G	A	C>T	0.389	0.778	somaticsniper,strelka	upstream_gene_variant	intron	CG15803	FBgn0038606
P33	3R	18958947	A	C	T>G	0.233	0.466	somaticsniper,strelka	5_prime_UTR_variant	3UTR	CG43732	FBgn0263983
P33	3R	23198088	G	A	C>T	0.286	0.572	somaticsniper,strelka	upstream_gene_variant	intron	cnc	FBgn0262975
P33	3R	23198089	G	A	C>T	0.306	0.612	varscan2,somaticsniper,strelka	upstream_gene_variant	intron	cnc	FBgn0262975
P33	3R	26294444	G	T	C>A	0.216	0.432	somaticsniper,strelka	intergenic_region	intergenic	intergenic	intergenic
P33	3R	28953291	A	C	T>G	0.17	0.34	mutect2,somaticsniper,strelka	intron_variant	intron	DIP-gamma	FBgn0039617
P33	3R	29551790	A	G	T>C	0.16	0.32	varscan2,somaticsniper	upstream_gene_variant	intergenic	intergenic	intergenic
P33	X	1651699	T	C	T>C	0.22	0.22	varscan2,somaticsniper	upstream_gene_variant	3UTR	br	FBgn0283451
P33	X	8343435	G	A	C>T	0.172	0.172	mutect2,somaticsniper,strelka	intron_variant	intron	nAChRalpha3	FBgn0015519
P35	2L	2311179	G	C	C>G	0.238	0.476	somaticsniper,strelka	upstream_gene_variant	intron	CG9967	FBgn0031413
P35	2L	5561905	T	C	T>C	0.318	0.636	varscan2,somaticsniper	upstream_gene_variant	intron	GluRIIB	FBgn0020429
P35	2L	7884638	T	C	T>C	0.2	0.4	somaticsniper,strelka	upstream_gene_variant	intron	CG7102	FBgn0031961
P35	2L	8086846	G	T	C>A	0.214	0.428	varscan2,somaticsniper	upstream_gene_variant	intron	Bsg	FBgn0261822
P35	2L	12294329	C	T	C>T	0.167	0.334	varscan2,somaticsniper	intron_variant	intron	bru1	FBgn0000114
P35	2L	14096356	C	T	C>T	0.212	0.424	somaticsniper,strelka	downstream_gene_variant	intergenic	intergenic	intergenic
P35	2L	21736541	T	A	T>A	0.383	0.766	mutect2,varscan2,somaticsniper,strelka,freebayes	downstream_gene_variant	intergenic	intergenic	intergenic
P35	2L	23038946	A	T	T>A	0.204	0.408	somaticsniper,strelka	intergenic_region	intergenic	intergenic	intergenic
P35	2L	23393489	T	C	T>C	0.393	0.786	somaticsniper,strelka	intergenic_region	intergenic	intergenic	intergenic
P35	2R	9470907	A	T	T>A	0.235	0.47	somaticsniper,strelka	intron_variant	intron	Camta	FBgn0259234
P35	2R	9470908	T	C	T>C	0.219	0.438	somaticsniper,strelka	intron_variant	intron	Camta	FBgn0259234
P35	2R	9470909	C	T	C>T	0.219	0.438	somaticsniper,strelka	intron_variant	intron	Camta	FBgn0259234
P35	2R	12370708	A	G	T>C	0.172	0.344	varscan2,somaticsniper	missense_variant	exon	CG33012	FBgn0053012
P35	2R	12698452	A	G	T>C	0.171	0.342	varscan2,somaticsniper	upstream_gene_variant	intergenic	intergenic	intergenic
P35	2R	14285366	T	C	T>C	0.211	0.422	somaticsniper,strelka	upstream_gene_variant	intron	Ih	FBgn0263397
P35	2R	18253622	A	C	T>G	0.226	0.452	varscan2,somaticsniper	upstream_gene_variant	intergenic	intergenic	intergenic
P35	2R	18395409	A	T	T>A	0.24	0.48	somaticsniper,strelka	upstream_gene_variant	intergenic	intergenic	intergenic
P35	2R	18499120	T	A	T>A	0.44	0.88	somaticsniper,strelka	upstream_gene_variant	intergenic	intergenic	intergenic
P35	2R	18499121	G	T	C>A	0.462	0.924	varscan2,somaticsniper,strelka	upstream_gene_variant	intergenic	intergenic	intergenic
P35	2R	20499380	G	A	C>T	0.298	0.596	varscan2,somaticsniper	upstream_gene_variant	intergenic	intergenic	intergenic
P35	2R	21106384	T	C	T>C	0.136	0.272	varscan2,somaticsniper	downstream_gene_variant	intron	ktub	FBgn0015721
P35	2R	24617174	T	C	T>C	0.205	0.41	varscan2,somaticsniper	upstream_gene_variant	intron	CG13594	FBgn0035041
P35	3L	1975375	C	T	C>T	0.25	0.5	somaticsniper,strelka	upstream_gene_variant	intergenic	intergenic	intergenic
P35	3L	1975376	C	A	C>A	0.292	0.584	somaticsniper,strelka	upstream_gene_variant	intergenic	intergenic	intergenic
P35	3L	8399674	A	G	T>C	0.0769	0.1538	mutect2,strelka	5_prime_UTR_variant	5UTR	CG7120	FBgn0035888
P35	3L	9673167	C	T	C>T	0.2	0.4	varscan2,somaticsniper	intron_variant	intron	fry	FBgn0016081
P35	3L	9676530	C	T	C>T	0.25	0.5	somaticsniper,strelka	upstream_gene_variant	intron	fry	FBgn0016081
P35	3L	10363461	A	G	T>C	0.286	0.572	somaticsniper,strelka	upstream_gene_variant	exon_3	CR46006	FBgn0267668
P35	3L	11299080	C	A	C>A	0.208	0.416	mutect2,varscan2,somaticsniper,strelka	upstream_gene_variant	intergenic	intergenic	intergenic
P35	3L	11299086	C	T	C>T	0.174	0.348	mutect2,somaticsniper,strelka	upstream_gene_variant	intergenic	intergenic	intergenic
P35	3L	11381624	G	C	C>G	0.194	0.388	somaticsniper,strelka	downstream_gene_variant	intergenic	intergenic	intergenic
P35	3L	11402104	A	C	T>G	0.417	0.834	somaticsniper,strelka	upstream_gene_variant	intergenic	intergenic	intergenic
P35	3L	12862941	G	A	C>T	0.163	0.326	varscan2,somaticsniper	upstream_gene_variant	intergenic	intergenic	intergenic
P35	3L	17012704	T	C	T>C	0.449	0.898	mutect2,varscan2,somaticsniper,strelka,freebayes	upstream_gene_variant	intergenic	intergenic	intergenic
P35	3L	19461699	C	T	C>T	0.352	0.704	mutect2,varscan2,somaticsniper,strelka,freebayes	downstream_gene_variant	intergenic	intergenic	intergenic
P35	3R	12181320	T	C	T>C	0.213	0.426	mutect2,varscan2,somaticsniper,strelka,freebayes	intergenic_region	intergenic	intergenic	intergenic
P35	3R	13506365	A	G	T>C	0.231	0.462	varscan2,somaticsniper	intergenic_region	intergenic	intergenic	intergenic
P35	3R	14357932	A	G	T>C	0.175	0.35	varscan2,somaticsniper	downstream_gene_variant	intron	NK7.1	FBgn0024321
P35	3R	15454839	G	A	C>T	0.189	0.378	varscan2,somaticsniper	intron_variant	intron	AdamTS-A	FBgn0038341
P35	3R	18078232	C	A	C>A	0.206	0.412	somaticsniper,strelka	upstream_gene_variant	intergenic	intergenic	intergenic
P35	3R	18097118	T	A	T>A	0.207	0.414	somaticsniper,strelka	intron_variant	intron	sr	FBgn0003499
P35	3R	18097119	G	A	C>T	0.222	0.444	somaticsniper,strelka	intron_variant	intron	sr	FBgn0003499
P35	3R	21419465	G	A	C>T	0.189	0.378	varscan2,somaticsniper	intron_variant	intron	lbl	FBgn0008651
P35	3R	23341032	C	G	C>G	0.241	0.482	mutect2,varscan2,somaticsniper,strelka,freebayes	intron_variant	intron	pnt	FBgn0003118
P35	3R	23739359	T	C	T>C	0.176	0.352	somaticsniper,strelka	intron_variant	intron	Hmgcr	FBgn0263782
P35	3R	24746703	G	T	C>A	0.186	0.372	somaticsniper,strelka	upstream_gene_variant	intron	tok	FBgn0004885
P35	3R	25610826	T	G	T>G	0.25	0.5	somaticsniper,strelka	upstream_gene_variant	intergenic	intergenic	intergenic
P35	3R	25610827	G	T	C>A	0.25	0.5	somaticsniper,strelka	upstream_gene_variant	intergenic	intergenic	intergenic
P35	3R	26476480	A	G	T>C	0.145	0.29	varscan2,somaticsniper	intron_variant	intron	plum	FBgn0039431
P35	X	657163	C	G	C>G	0.0926	0.0926	mutect2,strelka	missense_variant	exon	SkpA	FBgn0025637
P35	X	5402618	C	A	C>A	0.192	0.192	varscan2,somaticsniper	3_prime_UTR_variant	3UTR	SK	FBgn0029761
P35	X	5402621	T	A	T>A	0.231	0.231	varscan2,somaticsniper	3_prime_UTR_variant	3UTR	SK	FBgn0029761
P35	X	11696479	C	T	C>T	0.8	0.8	mutect2,varscan2,somaticsniper,strelka,freebayes	missense_variant	exon_3	PhKgamma	FBgn0011754
P35	X	13985158	C	A	C>A	0.35	0.35	mutect2,varscan2,somaticsniper,strelka,freebayes	intron_variant	intron	mamo	FBgn0267033
P35	X	18901539	A	G	T>C	0.316	0.316	varscan2,somaticsniper	downstream_gene_variant	intron	CG7378	FBgn0030976
P37	2L	2826630	A	C	T>G	0.269	0.538	somaticsniper,strelka	upstream_gene_variant	intron	Duox	FBgn0283531
P37	2L	3055967	G	T	C>A	0.0571	0.1142	mutect2,strelka	3_prime_UTR_variant	3UTR	FASN2	FBgn0042627
P37	2L	4300840	C	T	C>T	0.178	0.356	somaticsniper,strelka	intron_variant	intron	tutl	FBgn0010473
P37	2L	5663875	G	T	C>A	0.439	0.878	mutect2,varscan2,somaticsniper,strelka,freebayes	upstream_gene_variant	intron	Hsp60C	FBgn0031728
P37	2L	6697142	C	A	C>A	0.234	0.468	somaticsniper,strelka	intron_variant	intron	Tsp	FBgn0031850
P37	2L	9195223	C	A	C>A	0.113	0.226	mutect2,strelka	intron_variant	intron	tai	FBgn0041092
P37	2L	14129893	A	T	T>A	0.222	0.444	varscan2,somaticsniper	upstream_gene_variant	intron	CG46301	FBgn0283651
P37	2L	16232756	G	A	C>T	0.286	0.572	varscan2,somaticsniper	intron_variant	intron	CG42817	FBgn0261999
P37	2L	16359667	C	G	C>G	0.17	0.34	somaticsniper,strelka	upstream_gene_variant	intergenic	intergenic	intergenic
P37	2L	16504648	G	T	C>A	0.136	0.272	varscan2,somaticsniper	downstream_gene_variant	intron	Tpr2	FBgn0032586
P37	2L	16612386	A	T	T>A	0.24	0.48	somaticsniper,strelka	downstream_gene_variant	intron	CG42389	FBgn0259735
P37	2L	19104111	C	A	C>A	0.214	0.428	somaticsniper,strelka	upstream_gene_variant	intron	Lim3	FBgn0002023
P37	2R	947188	G	A	C>T	0.255	0.51	mutect2,varscan2,somaticsniper,strelka,freebayes	intron_variant	intron	CG40498	FBgn0069969
P37	2R	4164699	A	T	T>A	0.209	0.418	somaticsniper,strelka	intergenic_region	intergenic	intergenic	intergenic
P37	2R	10402406	C	T	C>T	0.174	0.348	varscan2,somaticsniper	downstream_gene_variant	intron	CG42732	FBgn0261698
P37	2R	10913701	A	G	T>C	0.167	0.334	somaticsniper,strelka	downstream_gene_variant	intergenic	intergenic	intergenic
P37	2R	10913702	A	G	T>C	0.183	0.366	somaticsniper,strelka	downstream_gene_variant	intergenic	intergenic	intergenic
P37	2R	10913755	T	C	T>C	0.161	0.322	somaticsniper,strelka	downstream_gene_variant	intergenic	intergenic	intergenic
P37	2R	15062922	C	A	C>A	0.153	0.306	varscan2,somaticsniper	intergenic_region	intergenic	intergenic	intergenic
P37	2R	16690517	C	A	C>A	0.286	0.572	varscan2,somaticsniper	upstream_gene_variant	intron	CG30463	FBgn0050463
P37	2R	19491191	G	A	C>T	0.291	0.582	mutect2,varscan2,somaticsniper,strelka,freebayes	synonymous_variant	exon_2	Oseg6	FBgn0034452
P37	2R	21391815	T	C	T>C	0.22	0.44	somaticsniper,strelka	downstream_gene_variant	intron	Acox57D-d	FBgn0034629
P37	2R	22520931	T	C	T>C	0.316	0.632	somaticsniper,strelka	intron_variant	intron	px	FBgn0003175
P37	2R	23421448	G	A	C>T	0.2	0.4	somaticsniper,strelka	upstream_gene_variant	intergenic	intergenic	intergenic
P37	3L	2860945	T	C	T>C	0.275	0.55	mutect2,varscan2,somaticsniper,strelka,freebayes	intron_variant	intron	Tet	FBgn0263392
P37	3L	5645192	A	C	T>G	0.159	0.318	varscan2,strelka	intron_variant	intron	Blimp-1	FBgn0035625
P37	3L	9559143	T	G	T>G	0.25	0.5	somaticsniper,strelka	intron_variant	intron	CG42673	FBgn0261555
P37	3L	9926380	C	T	C>T	0.184	0.368	mutect2,varscan2,somaticsniper,strelka	upstream_gene_variant	intron	CG34356	FBgn0085385
P37	3L	9948194	T	A	T>A	0.273	0.546	somaticsniper,strelka	intron_variant	intron	CG34356	FBgn0085385
P37	3R	1441807	G	A	C>T	0.217	0.434	somaticsniper,strelka	intron_variant	intron	Myo81F	FBgn0267431
P37	3R	8224918	C	G	C>G	0.19	0.38	varscan2,somaticsniper	upstream_gene_variant	intergenic	intergenic	intergenic
P37	3R	14081691	G	A	C>T	0.16	0.32	varscan2,somaticsniper	synonymous_variant	exon	foxo	FBgn0038197
P37	3R	18429844	C	T	C>T	0.179	0.358	varscan2,somaticsniper	3_prime_UTR_variant	3UTR	fru	FBgn0004652
P37	3R	18429846	A	G	T>C	0.194	0.388	varscan2,somaticsniper	3_prime_UTR_variant	3UTR	fru	FBgn0004652
P37	3R	23198088	G	A	C>T	0.25	0.5	somaticsniper,strelka	upstream_gene_variant	intron	cnc	FBgn0262975
P37	3R	25090993	C	G	C>G	0.207	0.414	varscan2,somaticsniper	upstream_gene_variant	intergenic	intergenic	intergenic
P37	3R	26679300	A	C	T>G	0.19	0.38	somaticsniper,strelka	intron_variant	intron	beat-VII	FBgn0250908
P37	3R	30360867	A	G	T>C	0.321	0.642	varscan2,somaticsniper	synonymous_variant	exon	hdc	FBgn0010113
P37	X	10425776	A	G	T>C	0.125	0.125	mutect2,strelka	intron_variant	intron	CG32683	FBgn0052683
P37	X	14798280	G	T	C>A	0.45	0.45	mutect2,varscan2,somaticsniper,strelka,freebayes	intron_variant	intron	rut	FBgn0003301
P37	X	16136302	T	G	T>G	0.321	0.321	somaticsniper,strelka	intron_variant	intron	disco-r	FBgn0042650
P37	X	18623711	G	A	C>T	0.286	0.286	varscan2,somaticsniper	upstream_gene_variant	intergenic	intergenic	intergenic
P37	X	20012649	T	C	T>C	0.222	0.222	varscan2,somaticsniper	intron_variant	intron	Dop2R	FBgn0053517
P37	X	22833505	C	T	C>T	0.391	0.391	varscan2,somaticsniper	downstream_gene_variant	pre_miRNA	mir-2491	FBgn0262237
P39	2L	1218066	A	C	T>G	0.182	0.364	varscan2,strelka	upstream_gene_variant	intergenic	intergenic	intergenic
P39	2L	2731584	T	A	T>A	0.214	0.428	somaticsniper,strelka	upstream_gene_variant	intron	CG31689	FBgn0031449
P39	2L	12419671	C	G	C>G	0.0952	0.1904	mutect2,strelka	intron_variant	intron	vir-1	FBgn0043841
P39	2L	16339748	T	C	T>C	0.333	0.666	varscan2,somaticsniper,strelka	synonymous_variant	exon_2	CG42266	FBgn0259151
P39	2L	19383394	G	A	C>T	0.556	1	somaticsniper,strelka	3_prime_UTR_variant	3UTR	fon	FBgn0032773
P39	2L	19383400	A	T	T>A	0.455	0.91	somaticsniper,strelka	3_prime_UTR_variant	3UTR	fon	FBgn0032773
P39	2L	21125597	C	T	C>T	0.146	0.292	mutect2,somaticsniper,strelka	downstream_gene_variant	intron	Nhe2	FBgn0040297
P39	2R	5227004	C	T	C>T	0.381	0.762	somaticsniper,strelka	intron_variant	intron	Nipped-A	FBgn0053554
P39	2R	5227005	C	T	C>T	0.391	0.782	somaticsniper,strelka	intron_variant	intron	Nipped-A	FBgn0053554
P39	2R	10549647	T	G	T>G	0.333	0.666	varscan2,somaticsniper	intergenic_region	intergenic	intergenic	intergenic
P39	2R	13403838	T	A	T>A	0.389	0.778	mutect2,somaticsniper	upstream_gene_variant	intergenic	intergenic	intergenic
P39	2R	16788421	A	G	T>C	0.179	0.358	varscan2,somaticsniper	synonymous_variant	exon_3	CG5522	FBgn0034158
P39	2R	16991671	T	C	T>C	0.2	0.4	mutect2,varscan2	downstream_gene_variant	intron	Cbp53E	FBgn0004580
P39	2R	20436029	A	G	T>C	0.3	0.6	mutect2,somaticsniper,strelka,freebayes	intron_variant	intron	CG12484	FBgn0086604
P39	2R	20436035	A	G	T>C	0.35	0.7	mutect2,somaticsniper,strelka,freebayes	intron_variant	intron	CG12484	FBgn0086604
P39	2R	23322375	T	C	T>C	0.333	0.666	varscan2,somaticsniper	missense_variant	exon_1	CG30416	FBgn0050416
P39	2R	23322377	G	A	C>T	0.286	0.572	varscan2,somaticsniper,strelka	synonymous_variant	exon_1	CG30416	FBgn0050416
P39	3L	7848882	G	T	C>A	0.231	0.462	somaticsniper,strelka	intron_variant	intron	Pdp1	FBgn0016694
P39	3L	7848883	C	T	C>T	0.231	0.462	somaticsniper,strelka	intron_variant	intron	Pdp1	FBgn0016694
P39	3L	9106250	A	T	T>A	0.312	0.624	varscan2,somaticsniper	downstream_gene_variant	intron	bol	FBgn0011206
P39	3L	13359669	A	C	T>G	0.333	0.666	somaticsniper,strelka	downstream_gene_variant	intergenic	intergenic	intergenic
P39	3L	15554428	C	A	C>A	0.333	0.666	somaticsniper,strelka	missense_variant	exon_2	AGO2	FBgn0087035
P39	3L	17106740	C	T	C>T	0.111	0.222	mutect2,strelka	intron_variant	intron	Rbp6	FBgn0260943
P39	3L	18268371	G	T	C>A	0.182	0.364	varscan2,somaticsniper	intergenic_region	intergenic	intergenic	intergenic
P39	3L	18268374	C	T	C>T	0.19	0.38	varscan2,somaticsniper	intergenic_region	intergenic	intergenic	intergenic
P39	3L	18981989	C	A	C>A	0.333	0.666	mutect2,somaticsniper,strelka	upstream_gene_variant	intergenic	intergenic	intergenic
P39	3L	25840357	C	A	C>A	0.211	0.422	somaticsniper,strelka	upstream_gene_variant	intron	CG40178	FBgn0058178
P39	3L	27256846	C	G	C>G	0.2	0.4	somaticsniper,strelka	intergenic_region	intergenic	intergenic	intergenic
P39	3R	7261667	C	G	C>G	0.333	0.666	somaticsniper,strelka	upstream_gene_variant	intron	Gld	FBgn0001112
P39	3R	7373180	T	G	T>G	0.529	1	somaticsniper,strelka	upstream_gene_variant	intergenic	intergenic	intergenic
P39	3R	14045104	A	T	T>A	0.625	1	somaticsniper,strelka	upstream_gene_variant	intergenic	intergenic	intergenic
P39	3R	14045105	C	T	C>T	0.625	1	somaticsniper,strelka	upstream_gene_variant	intergenic	intergenic	intergenic
P39	3R	14252600	G	A	C>T	0.2	0.4	varscan2,somaticsniper	upstream_gene_variant	intron	MetRS-m	FBgn0027083
P39	3R	21728451	C	T	C>T	0.174	0.348	mutect2,somaticsniper,strelka	downstream_gene_variant	intergenic	intergenic	intergenic
P39	4	561881	A	G	T>C	0.25	0.5	somaticsniper,strelka	upstream_gene_variant	intron	Pur-alpha	FBgn0022361
P41	2L	561616	T	C	T>C	0.276	0.552	varscan2,strelka	synonymous_variant	exon	CG11835	FBgn0031264
P41	2L	2051592	C	T	C>T	0.208	0.416	varscan2,somaticsniper	upstream_gene_variant	intergenic	intergenic	intergenic
P41	2L	2317689	A	C	T>G	0.151	0.302	somaticsniper,strelka	intron_variant	intron	eys	FBgn0031414
P41	2L	5230435	G	T	C>A	0.227	0.454	somaticsniper,strelka	intron_variant	intron	tkv	FBgn0003716
P41	2L	5350717	A	C	T>G	0.2	0.4	somaticsniper,strelka	intron_variant	intron	nompC	FBgn0016920
P41	2L	5350721	T	A	T>A	0.19	0.38	somaticsniper,strelka	intron_variant	intron	nompC	FBgn0016920
P41	2L	6213718	A	C	T>G	0.209	0.418	varscan2,somaticsniper	downstream_gene_variant	intergenic	intergenic	intergenic
P41	2L	12859120	T	C	T>C	0.161	0.322	somaticsniper,strelka	intergenic_region	intergenic	intergenic	intergenic
P41	2R	7136318	T	C	T>C	0.286	0.572	varscan2,somaticsniper	upstream_gene_variant	intergenic	intergenic	intergenic
P41	2R	8796766	T	A	T>A	0.206	0.412	somaticsniper,strelka	upstream_gene_variant	intergenic	intergenic	intergenic
P41	2R	10098872	C	T	C>T	0.0704	0.1408	mutect2,strelka	missense_variant	exon	RpLP0-like	FBgn0033485
P41	2R	10685982	A	T	T>A	0.231	0.462	somaticsniper,strelka	intron_variant	intron	stan	FBgn0024836
P41	2R	10913701	A	G	T>C	0.194	0.388	somaticsniper,strelka	downstream_gene_variant	intergenic	intergenic	intergenic
P41	2R	10913702	A	G	T>C	0.194	0.388	somaticsniper,strelka	downstream_gene_variant	intergenic	intergenic	intergenic
P41	2R	10913754	A	G	T>C	0.333	0.666	somaticsniper,strelka	downstream_gene_variant	intergenic	intergenic	intergenic
P41	2R	15845216	A	C	T>G	0.217	0.434	varscan2,somaticsniper	upstream_gene_variant	intron	CG8249	FBgn0034045
P41	2R	17080365	C	T	C>T	0.35	0.7	somaticsniper,strelka	upstream_gene_variant	intron	CG30460	FBgn0050460
P41	2R	18021484	G	C	C>G	0.349	0.698	somaticsniper,strelka	missense_variant	exon	CG10910	FBgn0034289
P41	2R	21753976	T	G	T>G	0.222	0.444	varscan2,somaticsniper	upstream_gene_variant	intergenic	intergenic	intergenic
P41	3L	1409648	G	C	C>G	0.2	0.4	somaticsniper,strelka	upstream_gene_variant	intron	Ptp61F	FBgn0267487
P41	3L	1440123	A	G	T>C	0.25	0.5	somaticsniper,strelka	upstream_gene_variant	intron	Ptp61F	FBgn0267487
P41	3L	3731082	T	C	T>C	0.233	0.466	varscan2,somaticsniper	intron_variant	intron	CG32264	FBgn0052264
P41	3L	3867559	G	A	C>T	0.143	0.286	somaticsniper,strelka	upstream_gene_variant	intergenic	intergenic	intergenic
P41	3L	3867560	A	G	T>C	0.143	0.286	somaticsniper,strelka	upstream_gene_variant	intergenic	intergenic	intergenic
P41	3L	4216943	A	G	T>C	0.0476	0.0952	mutect2,strelka	missense_variant	exon_18	CG43367	FBgn0263110
P41	3L	5530622	A	C	T>G	0.3	0.6	somaticsniper,strelka	upstream_gene_variant	intergenic	intergenic	intergenic
P41	3L	6155091	A	G	T>C	0.194	0.388	varscan2,somaticsniper	upstream_gene_variant	exon_1	CR45421	FBgn0266970
P41	3L	9392269	C	G	C>G	0.25	0.5	somaticsniper,strelka	intron_variant	intron	CG4080	FBgn0035983
P41	3L	10493985	G	T	C>A	0.163	0.326	varscan2,somaticsniper	downstream_gene_variant	intron	Rbfox1	FBgn0052062
P41	3L	10546390	C	A	C>A	0.143	0.286	varscan2,somaticsniper	intron_variant	intron	Rbfox1	FBgn0052062
P41	3L	11227993	T	G	T>G	0.273	0.546	varscan2,somaticsniper	3_prime_UTR_variant	exon_7	CG42671	FBgn0261553
P41	3L	15885470	G	A	C>T	0.133	0.266	somaticsniper,strelka	intron_variant	exon_1	CR44050	FBgn0264842
P41	3L	16506319	T	C	T>C	0.355	0.71	somaticsniper,strelka	intron_variant	intron	CG43373	FBgn0263131
P41	3L	19468243	T	G	T>G	0.321	0.642	somaticsniper,strelka	upstream_gene_variant	intergenic	intergenic	intergenic
P41	3R	3637503	G	T	C>A	0.18	0.36	somaticsniper,strelka	intergenic_region	intergenic	intergenic	intergenic
P41	3R	7405143	G	C	C>G	0.293	0.586	mutect2,varscan2,somaticsniper,strelka,freebayes	upstream_gene_variant	intergenic	intergenic	intergenic
P41	3R	10212979	G	A	C>T	0.239	0.478	mutect2,varscan2,somaticsniper,strelka,freebayes	5_prime_UTR_variant	exon_1	Timp	FBgn0025879
P41	3R	11457834	C	G	C>G	0.343	0.686	varscan2,somaticsniper	5_prime_UTR_variant	5UTR	PGRP-LB	FBgn0037906
P41	3R	12118879	C	T	C>T	0.182	0.364	somaticsniper,strelka	downstream_gene_variant	intergenic	intergenic	intergenic
P41	3R	14285559	G	A	C>T	0.24	0.48	somaticsniper,strelka	upstream_gene_variant	intron	trx	FBgn0003862
P41	3R	17762370	C	G	C>G	0.0685	0.137	mutect2,strelka	5_prime_UTR_variant	exon_1	TyrR	FBgn0038542
P41	3R	20803373	C	T	C>T	0.255	0.51	mutect2,varscan2,somaticsniper,strelka,freebayes	intron_variant	intron	Syp	FBgn0038826
P41	3R	23461567	G	A	C>T	0.0652	0.1304	mutect2,strelka	intron_variant	intron	CG4374	FBgn0039078
P41	3R	24275276	C	A	C>A	0.361	0.722	somaticsniper,strelka	splice_region_variant	3UTR	Orct2	FBgn0086365
P41	3R	28933543	G	T	C>A	0.342	0.684	varscan2,somaticsniper	intron_variant	intron	DIP-gamma	FBgn0039617
P41	X	10126736	C	G	C>G	0.25	0.25	varscan2,somaticsniper	downstream_gene_variant	ncRNA	CR44894	FBgn0266199
P41	X	20084121	G	T	C>A	0.208	0.208	somaticsniper,strelka	intergenic_region	intergenic	intergenic	intergenic
P43	2L	1218066	A	C	T>G	0.212	0.424	varscan2,somaticsniper,strelka	upstream_gene_variant	intergenic	intergenic	intergenic
P43	2L	2721988	C	T	C>T	0.2	0.4	somaticsniper,strelka	upstream_gene_variant	intergenic	intergenic	intergenic
P43	2L	4241068	T	A	T>A	0.324	0.648	somaticsniper,strelka	upstream_gene_variant	intergenic	intergenic	intergenic
P43	2L	10108116	A	G	T>C	0.273	0.546	somaticsniper,strelka	intron_variant	intron	CG34109	FBgn0083945
P43	2L	10441810	C	T	C>T	0.308	0.616	somaticsniper,strelka	upstream_gene_variant	intergenic	intergenic	intergenic
P43	2L	10441811	A	C	T>G	0.308	0.616	somaticsniper,strelka	upstream_gene_variant	intergenic	intergenic	intergenic
P43	2L	11491208	G	T	C>A	0.265	0.53	somaticsniper,strelka	downstream_gene_variant	intergenic	intergenic	intergenic
P43	2L	12351960	G	T	C>A	0.529	1	mutect2,varscan2,somaticsniper,strelka,freebayes	5_prime_UTR_premature_start_codon_gain_variant	5UTR	bru2	FBgn0262475
P43	2L	13131597	T	A	T>A	0.194	0.388	somaticsniper,strelka	synonymous_variant	exon_2	CG5122	FBgn0032471
P43	2L	15212232	T	A	T>A	0.0976	0.1952	mutect2,strelka	upstream_gene_variant	intergenic	intergenic	intergenic
P43	2L	16339638	T	G	T>G	0.268	0.536	varscan2,somaticsniper	missense_variant	exon_2	CG42266	FBgn0259151
P43	2L	17886700	T	A	T>A	0.0526	0.1052	mutect2,strelka	intergenic_region	intergenic	intergenic	intergenic
P43	2L	18235198	T	A	T>A	0.104	0.208	mutect2,strelka	intron_variant	intron	CG42750	FBgn0261804
P43	2L	18926684	A	G	T>C	0.227	0.454	somaticsniper,strelka	intron_variant	intron	ssp3	FBgn0032723
P43	2R	7754649	G	T	C>A	0.119	0.238	varscan2,strelka	intron_variant	intron	CG45093	FBgn0266526
P43	2R	8379951	C	T	C>T	0.184	0.368	mutect2,varscan2,somaticsniper,strelka	intron_variant	intron	pdm3	FBgn0261588
P43	2R	10510261	T	G	T>G	0.345	0.69	somaticsniper,strelka	downstream_gene_variant	intron	lola	FBgn0283521
P43	2R	11080697	T	C	T>C	0.185	0.37	varscan2,somaticsniper	upstream_gene_variant	intron	luna	FBgn0040765
P43	2R	11080700	C	A	C>A	0.207	0.414	varscan2,somaticsniper	upstream_gene_variant	intron	luna	FBgn0040765
P43	2R	11489765	G	C	C>G	0.155	0.31	somaticsniper,strelka	intron_variant	intron	inv	FBgn0001269
P43	2R	13922597	T	A	T>A	0.263	0.526	somaticsniper,strelka	intron_variant	intron	shot	FBgn0013733
P43	2R	14019186	G	C	C>G	0.25	0.5	mutect2,varscan2,somaticsniper,strelka,freebayes	intron_variant	intron	mam	FBgn0002643
P43	2R	18476450	A	G	T>C	0.194	0.388	somaticsniper,strelka	intron_variant	intron	CG30116	FBgn0028496
P43	2R	18476451	C	A	C>A	0.188	0.376	somaticsniper,strelka	intron_variant	intron	CG30116	FBgn0028496
P43	2R	20182601	G	C	C>G	0.143	0.286	varscan2,somaticsniper	intergenic_region	intergenic	intergenic	intergenic
P43	2R	20505202	C	T	C>T	0.108	0.216	mutect2,strelka	missense_variant	exon_1	Obp57a	FBgn0043535
P43	3L	4898078	C	T	C>T	0.171	0.342	somaticsniper,strelka	synonymous_variant	exon	CG13705	FBgn0035582
P43	3L	7984021	T	A	T>A	0.242	0.484	varscan2,somaticsniper	intron_variant	intron	nmo	FBgn0011817
P43	3L	8368173	T	G	T>G	0.239	0.478	varscan2,somaticsniper	upstream_gene_variant	intergenic	intergenic	intergenic
P43	3L	9715945	G	C	C>G	0.167	0.334	somaticsniper,strelka	missense_variant	exon	vsg	FBgn0045823
P43	3L	10785807	T	C	T>C	0.194	0.388	varscan2,somaticsniper	upstream_gene_variant	intergenic	intergenic	intergenic
P43	3L	11289286	C	A	C>A	0.0606	0.1212	mutect2,strelka	missense_variant	exon	CG6175	FBgn0036152
P43	3L	19052278	C	A	C>A	0.145	0.29	somaticsniper,strelka	upstream_gene_variant	intergenic	intergenic	intergenic
P43	3L	19052279	A	G	T>C	0.145	0.29	varscan2,somaticsniper,strelka	upstream_gene_variant	intergenic	intergenic	intergenic
P43	3R	3272506	A	T	T>A	0.15	0.3	somaticsniper,strelka	intergenic_region	intergenic	intergenic	intergenic
P43	3R	4693026	C	A	C>A	0.217	0.434	mutect2,varscan2,somaticsniper,strelka,freebayes	upstream_gene_variant	intron	CG43427	FBgn0263346
P43	3R	7159546	T	C	T>C	0.176	0.352	mutect2,somaticsniper	upstream_gene_variant	exon_2	CR45909	FBgn0267569
P43	3R	18064130	G	T	C>A	0.176	0.352	varscan2,somaticsniper	intergenic_region	intergenic	intergenic	intergenic
P43	3R	18655328	C	T	C>T	0.075	0.15	mutect2,strelka	synonymous_variant	exon_3	CG31224	FBgn0051224
P43	3R	21925358	C	A	C>A	0.154	0.308	varscan2,somaticsniper	intergenic_region	intergenic	intergenic	intergenic
P43	3R	26619387	A	C	T>G	0.19	0.38	somaticsniper,strelka	synonymous_variant	exon	TwdlM	FBgn0039434
P43	3R	26619402	A	C	T>G	0.241	0.482	somaticsniper,strelka	synonymous_variant	exon	TwdlM	FBgn0039434
P43	3R	26653439	G	T	C>A	0.115	0.23	somaticsniper,strelka	upstream_gene_variant	intron	beat-VII	FBgn0250908
P43	3R	31709196	T	C	T>C	0.211	0.422	varscan2,somaticsniper	upstream_gene_variant	intergenic	intergenic	intergenic
P43	X	11382838	C	T	C>T	0.286	0.286	somaticsniper,strelka	upstream_gene_variant	intron	dlg1	FBgn0001624
P43	X	16644992	A	G	T>C	0.2	0.2	varscan2,somaticsniper	upstream_gene_variant	intron	mthl1	FBgn0030766
P45a	2L	4649272	G	A	C>T	0.192	0.384	varscan2,somaticsniper	upstream_gene_variant	intergenic	intergenic	intergenic
P45a	2L	6024998	A	G	T>C	0.5	1	varscan2,strelka	upstream_gene_variant	intergenic	intergenic	intergenic
P45a	2L	8631927	T	G	T>G	0.2	0.4	somaticsniper,strelka	intron_variant	intron	Sema-1a	FBgn0011259
P45a	2L	8784498	C	A	C>A	0.286	0.572	varscan2,somaticsniper	upstream_gene_variant	intergenic	intergenic	intergenic
P45a	2L	9738240	G	T	C>A	0.174	0.348	varscan2,somaticsniper	downstream_gene_variant	intron	Nckx30C	FBgn0028704
P45a	2L	10679097	A	G	T>C	0.286	0.572	varscan2,somaticsniper	synonymous_variant	exon	CG17104	FBgn0040496
P45a	2L	12406340	C	T	C>T	0.269	0.538	somaticsniper,strelka	upstream_gene_variant	intron	vir-1	FBgn0043841
P45a	2L	13293349	T	C	T>C	0.294	0.588	somaticsniper,strelka	3_prime_UTR_variant	3UTR	CG16824	FBgn0040973
P45a	2L	13293350	G	A	C>T	0.294	0.588	somaticsniper,strelka	3_prime_UTR_variant	3UTR	CG16824	FBgn0040973
P45a	2L	16185707	A	G	T>C	0.269	0.538	varscan2,strelka	intron_variant	intron	Ca-alpha1D	FBgn0001991
P45a	2L	16508502	G	A	C>T	0.233	0.466	freebayes	3_prime_UTR_variant	3UTR	CG5953	FBgn0032587
P45a	2L	17772904	C	G	C>G	0.312	0.624	varscan2,somaticsniper	intron_variant	intron	CadN	FBgn0015609
P45a	2L	23333276	G	T	C>A	0.233	0.466	somaticsniper,strelka	intergenic_region	intergenic	intergenic	intergenic
P45a	2L	23333277	A	T	T>A	0.233	0.466	somaticsniper,strelka	intergenic_region	intergenic	intergenic	intergenic
P45a	2R	1734398	G	C	C>G	0.414	0.828	somaticsniper,strelka	downstream_gene_variant	intron	CG41520	FBgn0087011
P45a	2R	11050270	T	G	T>G	0.278	0.556	varscan2,somaticsniper	intron_variant	intron	luna	FBgn0040765
P45a	2R	12043765	A	G	T>C	0.222	0.444	varscan2,somaticsniper	upstream_gene_variant	intergenic	intergenic	intergenic
P45a	2R	12963301	T	G	T>G	0.3	0.6	somaticsniper,strelka	downstream_gene_variant	intergenic	intergenic	intergenic
P45a	2R	14265792	G	A	C>T	0.207	0.414	somaticsniper,strelka	upstream_gene_variant	intron	CG8547	FBgn0033919
P45a	2R	20109889	C	T	C>T	0.316	0.632	mutect2,varscan2,somaticsniper,strelka,freebayes	upstream_gene_variant	intergenic	intergenic	intergenic
P45a	2R	20182601	G	C	C>G	0.267	0.534	varscan2,somaticsniper	intergenic_region	intergenic	intergenic	intergenic
P45a	2R	21911985	C	A	C>A	0.3	0.6	varscan2,somaticsniper	intron_variant	intron	Fili	FBgn0085397
P45a	2R	21956951	T	G	T>G	0.375	0.75	somaticsniper,strelka	upstream_gene_variant	intergenic	intergenic	intergenic
P45a	3L	1253248	C	T	C>T	0.467	0.934	somaticsniper,strelka	upstream_gene_variant	intron	CG9133	FBgn0035198
P45a	3L	7344658	C	A	C>A	0.139	0.278	mutect2,strelka	upstream_gene_variant	intron	CG8596	FBgn0035767
P45a	3L	10195308	C	G	C>G	0.222	0.444	varscan2,somaticsniper	intron_variant	intron	ect	FBgn0000451
P45a	3L	11043204	A	C	T>G	0.214	0.428	somaticsniper,strelka	upstream_gene_variant	intron	CG43693	FBgn0263776
P45a	3L	16249371	G	T	C>A	0.19	0.38	varscan2,somaticsniper	downstream_gene_variant	intergenic	intergenic	intergenic
P45a	3R	17243184	A	G	T>C	0.227	0.454	somaticsniper,strelka	intron_variant	intron	beat-IIb	FBgn0038494
P45a	3R	18096754	T	A	T>A	0.241	0.482	varscan2,somaticsniper	intron_variant	intron	sr	FBgn0003499
P45a	3R	18442855	G	C	C>G	0.304	0.608	varscan2,somaticsniper	upstream_gene_variant	intron	fru	FBgn0004652
P45a	3R	27077478	T	C	T>C	0.279	0.558	mutect2,varscan2,somaticsniper,strelka,freebayes	intron_variant	intron	CG14257	FBgn0039479
P45a	3R	31152358	C	A	C>A	0.2	0.4	somaticsniper,strelka	intron_variant	intron	Gycbeta100B	FBgn0013973
P45a	X	16648195	C	T	C>T	0.2	0.2	varscan2,somaticsniper	3_prime_UTR_variant	exon_2	mthl1	FBgn0030766
P45a	Y	3520044	A	T	T>A	0.357	0.357	somaticsniper,strelka	intergenic_region	intergenic	intergenic	intergenic
P45a	Y	3520045	A	T	T>A	0.357	0.357	somaticsniper,strelka	intergenic_region	intergenic	intergenic	intergenic
P47	2L	3273115	A	C	T>G	0.333	0.666	somaticsniper,strelka	downstream_gene_variant	intergenic	intergenic	intergenic
P47	2L	3273116	C	G	C>G	0.333	0.666	somaticsniper,strelka	downstream_gene_variant	intergenic	intergenic	intergenic
P47	2L	7402640	C	G	C>G	0.267	0.534	somaticsniper,strelka	upstream_gene_variant	intron	CG5171	FBgn0031907
P47	2L	9590087	C	T	C>T	0.333	0.666	mutect2,varscan2,somaticsniper,strelka,freebayes	missense_variant	exon_2	CG3841	FBgn0032131
P47	2L	11761321	T	C	T>C	0.3	0.6	mutect2,strelka	intergenic_region	intergenic	intergenic	intergenic
P47	2L	12483888	C	T	C>T	0.235	0.47	somaticsniper,strelka	upstream_gene_variant	intron	bun	FBgn0259176
P47	2L	14961003	G	T	C>A	0.4	0.8	somaticsniper,strelka	intron_variant	intron	CG42313	FBgn0259213
P47	2L	15208392	G	A	C>T	0.5	1	varscan2,somaticsniper	downstream_gene_variant	exon_1	CR44196	FBgn0265085
P47	2L	15208398	A	C	T>G	0.462	0.924	varscan2,somaticsniper	downstream_gene_variant	exon_1	CR44196	FBgn0265085
P47	2L	15933573	T	G	T>G	0.229	0.458	mutect2,varscan2,somaticsniper,strelka	intron_variant	intron	beat-Ib	FBgn0028645
P47	2L	16607573	C	A	C>A	0.467	0.934	mutect2,varscan2,somaticsniper,strelka	synonymous_variant	exon	CG4631	FBgn0032590
P47	2R	10840839	C	G	C>G	0.235	0.47	somaticsniper,strelka	synonymous_variant	exon	CG30015	FBgn0050015
P47	2R	10913701	A	G	T>C	0.2	0.4	somaticsniper,strelka	downstream_gene_variant	intergenic	intergenic	intergenic
P47	2R	10913702	A	G	T>C	0.2	0.4	somaticsniper,strelka	downstream_gene_variant	intergenic	intergenic	intergenic
P47	2R	10977214	C	T	C>T	0.429	0.858	varscan2,somaticsniper	downstream_gene_variant	intergenic	intergenic	intergenic
P47	2R	11739228	A	C	T>G	0.24	0.48	varscan2,somaticsniper	intergenic_region	intergenic	intergenic	intergenic
P47	2R	12493208	A	T	T>A	0.458	0.916	somaticsniper,strelka	upstream_gene_variant	intron	fdl	FBgn0045063
P47	2R	13552930	C	G	C>G	0.308	0.616	somaticsniper,strelka	upstream_gene_variant	intron	CG33156	FBgn0053156
P47	2R	13552931	T	A	T>A	0.308	0.616	somaticsniper,strelka	upstream_gene_variant	intron	CG33156	FBgn0053156
P47	2R	16168595	G	A	C>T	0.161	0.322	varscan2,somaticsniper	missense_variant	exon	lbk	FBgn0034083
P47	2R	16516521	G	T	C>A	0.25	0.5	varscan2,somaticsniper	5_prime_UTR_variant	exon_1	Sema-2a	FBgn0011260
P47	2R	20067553	G	T	C>A	0.158	0.316	mutect2,strelka	intergenic_region	intergenic	intergenic	intergenic
P47	2R	24309691	C	A	C>A	0.316	0.632	varscan2,somaticsniper	intron_variant	intron	betaTub60D	FBgn0003888
P47	3L	2313933	C	G	C>G	0.167	0.334	somaticsniper,strelka	downstream_gene_variant	intergenic	intergenic	intergenic
P47	3L	2709724	T	C	T>C	0.292	0.584	mutect2,strelka	intron_variant	intron	Fife	FBgn0264606
P47	3L	2912907	A	G	T>C	0.294	0.588	somaticsniper,strelka	downstream_gene_variant	intron	Shab	FBgn0262593
P47	3L	2912908	A	G	T>C	0.294	0.588	somaticsniper,strelka	downstream_gene_variant	intron	Shab	FBgn0262593
P47	3L	4375331	G	C	C>G	0.263	0.526	somaticsniper,strelka	downstream_gene_variant	intron	DopEcR	FBgn0035538
P47	3L	4758422	A	G	T>C	0.3	0.6	somaticsniper,strelka	3_prime_UTR_variant	3UTR	CG13711	FBgn0035572
P47	3L	5525932	C	A	C>A	0.375	0.75	varscan2,somaticsniper	intron_variant	intron	Lkr	FBgn0035610
P47	3L	6188077	G	A	C>T	0.143	0.286	varscan2,strelka	synonymous_variant	exon_1	D19A	FBgn0022935
P47	3L	6188085	A	G	T>C	0.143	0.286	varscan2,strelka	missense_variant	exon_1	D19A	FBgn0022935
P47	3L	7651961	T	A	T>A	0.2	0.4	somaticsniper,strelka	3_prime_UTR_variant	3UTR	CG7492	FBgn0035807
P47	3L	11414953	T	C	T>C	0.263	0.526	varscan2,somaticsniper	intergenic_region	intergenic	intergenic	intergenic
P47	3L	19052278	C	A	C>A	0.267	0.534	somaticsniper,strelka	upstream_gene_variant	intergenic	intergenic	intergenic
P47	3L	19052279	A	G	T>C	0.267	0.534	somaticsniper,strelka	upstream_gene_variant	intergenic	intergenic	intergenic
P47	3L	24256022	A	T	T>A	0.212	0.424	somaticsniper,strelka	intron_variant	intron	Snap25	FBgn0011288
P47	3L	24256052	A	T	T>A	0.206	0.412	somaticsniper,strelka	intron_variant	intron	Snap25	FBgn0011288
P47	3R	9730108	G	A	C>T	0.231	0.462	varscan2,strelka	5_prime_UTR_premature_start_codon_gain_variant	5UTR	FoxP	FBgn0262477
P47	3R	9730109	G	T	C>A	0.231	0.462	varscan2,strelka	5_prime_UTR_variant	5UTR	FoxP	FBgn0262477
P47	3R	10799950	A	C	T>G	0.3	0.6	somaticsniper,strelka	missense_variant	exon_11	CG14692	FBgn0037836
P47	3R	14357932	A	G	T>C	0.184	0.368	varscan2,somaticsniper	downstream_gene_variant	intron	NK7.1	FBgn0024321
P47	3R	15174505	C	A	C>A	0.368	0.736	mutect2,varscan2,somaticsniper,strelka,freebayes	downstream_gene_variant	intron	Mf	FBgn0038294
P47	3R	17657620	A	C	T>G	0.333	0.666	somaticsniper,strelka	upstream_gene_variant	intron	CG14322	FBgn0038532
P47	3R	17657625	C	T	C>T	0.238	0.476	somaticsniper,strelka	upstream_gene_variant	intron	CG14322	FBgn0038532
P47	3R	17657630	G	C	C>G	0.263	0.526	somaticsniper,strelka	upstream_gene_variant	intron	CG14322	FBgn0038532
P47	3R	18306210	C	A	C>A	0.158	0.316	mutect2,strelka	upstream_gene_variant	intron	PKD	FBgn0038603
P47	3R	19069531	T	C	T>C	0.308	0.616	varscan2,somaticsniper	intron_variant	intron	cdi	FBgn0004876
P47	3R	23225183	A	G	T>C	0.529	1	somaticsniper,strelka	upstream_gene_variant	intron	cnc	FBgn0262975
P47	3R	27890056	A	C	T>G	0.222	0.444	varscan2,somaticsniper	intron_variant	intron	CG34353	FBgn0085382
P47	3R	31428325	C	A	C>A	0.409	0.818	somaticsniper,strelka	intron_variant	intron	Gprk2	FBgn0261988
P47	X	6109992	A	G	T>C	0.5	0.5	mutect2,strelka	intron_variant	intron	Ca-alpha1T	FBgn0264386
P47	X	8559232	C	G	C>G	0.308	0.308	varscan2,somaticsniper	missense_variant	exon	CG12112	FBgn0030048
P47	X	8946272	C	G	C>G	0.3	0.3	somaticsniper,strelka	intron_variant	intron	rdgA	FBgn0261549
P47	X	8946274	A	G	T>C	0.3	0.3	somaticsniper,strelka	intron_variant	intron	rdgA	FBgn0261549
P47	X	12093451	G	C	C>G	0.292	0.292	somaticsniper,strelka	downstream_gene_variant	ncRNA	CR43960	FBgn0264675
P49	2L	5814735	A	G	T>C	0.235	0.47	somaticsniper,strelka	downstream_gene_variant	intergenic	intergenic	intergenic
P49	2L	7228581	G	C	C>G	0.353	0.706	mutect2,somaticsniper,strelka,freebayes	3_prime_UTR_variant	3UTR	CG43799	FBgn0264343
P49	2L	7335774	T	G	T>G	0.238	0.476	varscan2,somaticsniper	intron_variant	intron	Wnt6	FBgn0031902
P49	2L	7603165	G	T	C>A	0.267	0.534	somaticsniper,strelka	upstream_gene_variant	intergenic	intergenic	intergenic
P49	2L	9948461	C	T	C>T	0.103	0.206	mutect2,strelka	upstream_gene_variant	intergenic	intergenic	intergenic
P49	2L	12551855	C	T	C>T	0.2	0.4	somaticsniper,strelka	intergenic_region	intergenic	intergenic	intergenic
P49	2L	17441570	C	A	C>A	0.103	0.206	varscan2,strelka	missense_variant	exon	dl	FBgn0260632
P49	2L	17441574	C	T	C>T	0.0833	0.1666	varscan2,strelka	synonymous_variant	exon	dl	FBgn0260632
P49	2L	17607549	T	C	T>C	0.3	0.6	somaticsniper,strelka	upstream_gene_variant	intergenic	intergenic	intergenic
P49	2L	18158925	T	C	T>C	0.188	0.376	varscan2,somaticsniper	5_prime_UTR_variant	5UTR	CG7200	FBgn0032671
P49	2L	18204222	T	C	T>C	0.333	0.666	varscan2,somaticsniper	synonymous_variant	exon_7	CG42750	FBgn0261804
P49	2L	19178879	G	C	C>G	0.206	0.412	varscan2,somaticsniper	3_prime_UTR_variant	3UTR	brat	FBgn0010300
P49	2L	19949715	A	C	T>G	0.222	0.444	varscan2,somaticsniper	intron_variant	intron	sick	FBgn0263873
P49	2L	19949716	T	A	T>A	0.192	0.384	varscan2,somaticsniper	intron_variant	intron	sick	FBgn0263873
P49	2L	21943770	T	G	T>G	0.364	0.728	mutect2,varscan2,somaticsniper,strelka,freebayes	intergenic_region	intergenic	intergenic	intergenic
P49	2R	9340930	G	A	C>T	0.318	0.636	somaticsniper,strelka	upstream_gene_variant	intron	CG13954	FBgn0033405
P49	2R	9340931	C	T	C>T	0.318	0.636	varscan2,somaticsniper,strelka	upstream_gene_variant	intron	CG13954	FBgn0033405
P49	2R	13768182	G	A	C>T	0.242	0.484	varscan2,somaticsniper	upstream_gene_variant	intergenic	intergenic	intergenic
P49	2R	14954625	C	A	C>A	0.28	0.56	somaticsniper,strelka	upstream_gene_variant	intron	aPKC	FBgn0261854
P49	2R	14954626	C	T	C>T	0.28	0.56	somaticsniper,strelka	upstream_gene_variant	intron	aPKC	FBgn0261854
P49	2R	14954628	G	T	C>A	0.28	0.56	somaticsniper,strelka	upstream_gene_variant	intron	aPKC	FBgn0261854
P49	2R	15534757	C	T	C>T	0.5	1	somaticsniper,strelka	upstream_gene_variant	intron	CG30471	FBgn0050471
P49	2R	15641566	T	A	T>A	0.214	0.428	varscan2,somaticsniper	intron_variant	intron	CG42524	FBgn0260429
P49	2R	20605932	C	A	C>A	0.258	0.516	somaticsniper,strelka	splice_region_variant	3UTR	HnRNP-K	FBgn0267791
P49	2R	22786439	A	G	T>C	0.231	0.462	varscan2,somaticsniper	downstream_gene_variant	intron	CG42260	FBgn0259145
P49	2R	23976268	T	A	T>A	0.217	0.434	varscan2,somaticsniper	missense_variant	exon_1	Gadd34	FBgn0034948
P49	3L	4283806	C	G	C>G	0.184	0.368	mutect2,varscan2,somaticsniper,strelka	upstream_gene_variant	intergenic	intergenic	intergenic
P49	3L	4751291	T	C	T>C	0.212	0.424	freebayes	upstream_gene_variant	intron	RhoGEF64C	FBgn0035574
P49	3L	9381265	A	T	T>A	0.25	0.5	varscan2,somaticsniper	upstream_gene_variant	intergenic	intergenic	intergenic
P49	3L	10203944	A	G	T>C	0.188	0.376	varscan2,somaticsniper	upstream_gene_variant	intergenic	intergenic	intergenic
P49	3L	10926063	T	C	T>C	0.24	0.48	somaticsniper,strelka	intergenic_region	intergenic	intergenic	intergenic
P49	3L	11297945	G	A	C>T	0.286	0.572	somaticsniper,strelka	upstream_gene_variant	intergenic	intergenic	intergenic
P49	3L	20816441	T	C	T>C	0.182	0.364	somaticsniper,strelka	5_prime_UTR_variant	5UTR	Pka-R1	FBgn0259243
P49	3R	5671787	G	A	C>T	0.143	0.286	mutect2,varscan2,strelka	upstream_gene_variant	intron	Atg17	FBgn0037363
P49	3R	11356002	T	G	T>G	0.3	0.6	varscan2,somaticsniper	upstream_gene_variant	intron	pros	FBgn0004595
P49	3R	13670401	G	T	C>A	0.154	0.308	varscan2,somaticsniper	downstream_gene_variant	intron	Task6	FBgn0038165
P49	3R	20673240	A	T	T>A	0.333	0.666	somaticsniper,strelka	upstream_gene_variant	intergenic	intergenic	intergenic
P49	3R	24762425	G	A	C>T	0.214	0.428	varscan2,somaticsniper	downstream_gene_variant	intron	AstA	FBgn0015591
P49	3R	25398697	A	T	T>A	0.288	0.576	somaticsniper,strelka	synonymous_variant	exon	Muc96D	FBgn0051439
P49	3R	25801120	A	G	T>C	0.308	0.616	somaticsniper,strelka	upstream_gene_variant	intergenic	intergenic	intergenic
P49	3R	29181533	C	G	C>G	0.204	0.408	varscan2,somaticsniper	missense_variant	exon_2	CG14509	FBgn0039647
P49	3R	30333538	C	A	C>A	0.171	0.342	mutect2,strelka	intron_variant	intron	hdc	FBgn0010113
P49	X	5584610	T	G	T>G	0.182	0.182	somaticsniper,strelka	intergenic_region	intergenic	intergenic	intergenic
P49	X	13046713	T	G	T>G	0.212	0.212	varscan2,somaticsniper	intron_variant	intron	rad	FBgn0265597
P51	2L	3273115	A	C	T>G	0.263	0.526	somaticsniper,strelka	downstream_gene_variant	intergenic	intergenic	intergenic
P51	2L	3273116	C	G	C>G	0.263	0.526	varscan2,somaticsniper,strelka	downstream_gene_variant	intergenic	intergenic	intergenic
P51	2L	6273821	A	G	T>C	0.25	0.5	varscan2,somaticsniper	downstream_gene_variant	intron	Ddr	FBgn0053531
P51	2L	6506920	G	T	C>A	0.167	0.334	mutect2,strelka	downstream_gene_variant	intron	CG31637	FBgn0051637
P51	2L	7048141	T	A	T>A	0.0968	0.1936	mutect2,strelka	upstream_gene_variant	intron	milt	FBgn0262872
P51	2L	11585287	C	T	C>T	0.231	0.462	somaticsniper,strelka	upstream_gene_variant	intron	kek2	FBgn0015400
P51	2L	11818944	G	T	C>A	0.273	0.546	mutect2,varscan2,somaticsniper,strelka,freebayes	intron_variant	intron	Pde1c	FBgn0264815
P51	2L	14031740	T	G	T>G	0.333	0.666	mutect2,varscan2,somaticsniper,strelka,freebayes	upstream_gene_variant	intergenic	intergenic	intergenic
P51	2L	14471368	T	A	T>A	0.3	0.6	freebayes	intergenic_region	intergenic	intergenic	intergenic
P51	2L	14792633	C	A	C>A	0.214	0.428	mutect2,varscan2,strelka	downstream_gene_variant	intergenic	intergenic	intergenic
P51	2L	15245340	C	T	C>T	0.364	0.728	varscan2,somaticsniper	upstream_gene_variant	intron	ZnT35C	FBgn0028516
P51	2L	17606839	T	C	T>C	0.333	0.666	varscan2,somaticsniper	downstream_gene_variant	exon_1	CR44412	FBgn0265585
P51	2L	20238427	T	G	T>G	0.312	0.624	varscan2,somaticsniper	intergenic_region	intergenic	intergenic	intergenic
P51	2L	21233164	T	A	T>A	0.235	0.47	somaticsniper,strelka	synonymous_variant	ncRNA	CR45713	FBgn0267277
P51	2R	11378578	T	C	T>C	0.222	0.444	somaticsniper,strelka	downstream_gene_variant	intron	Tsp47F	FBgn0033629
P51	2R	11642970	T	A	T>A	0.5	1	varscan2,somaticsniper	3_prime_UTR_variant	3UTR	CG9003	FBgn0033639
P51	2R	20494574	T	C	T>C	0.093	0.186	mutect2,strelka	upstream_gene_variant	intergenic	intergenic	intergenic
P51	2R	23979917	G	A	C>T	0.3	0.6	varscan2,somaticsniper	5_prime_UTR_variant	5UTR	Sox14	FBgn0005612
P51	3L	637526	G	T	C>A	0.0882	0.1764	mutect2,strelka	upstream_gene_variant	exon_2	CR43423	FBgn0263342
P51	3L	1263010	A	C	T>G	0.261	0.522	varscan2,somaticsniper	upstream_gene_variant	intron	tfc	FBgn0035199
P51	3L	4940612	A	T	T>A	0.235	0.47	varscan2,somaticsniper	intron_variant	intron	Con	FBgn0005775
P51	3L	4940613	A	C	T>G	0.235	0.47	varscan2,somaticsniper	intron_variant	intron	Con	FBgn0005775
P51	3L	5522821	C	A	C>A	0.217	0.434	somaticsniper,strelka	intron_variant	intron	Lkr	FBgn0035610
P51	3L	5522822	C	T	C>T	0.217	0.434	somaticsniper,strelka	intron_variant	intron	Lkr	FBgn0035610
P51	3L	9022242	G	T	C>A	0.267	0.534	varscan2,somaticsniper	upstream_gene_variant	intergenic	intergenic	intergenic
P51	3L	11397819	T	C	T>C	0.19	0.38	varscan2,somaticsniper	missense_variant	exon	CG44362	FBgn0265469
P51	3L	17294789	G	T	C>A	0.417	0.834	somaticsniper,strelka	intergenic_region	intergenic	intergenic	intergenic
P51	3L	28014887	C	A	C>A	0.318	0.636	somaticsniper,strelka	upstream_gene_variant	intergenic	intergenic	intergenic
P51	3R	5550192	G	A	C>T	0.233	0.466	varscan2,somaticsniper	synonymous_variant	exon_1	mia	FBgn0014342
P51	3R	7049199	A	T	T>A	0.286	0.572	varscan2,somaticsniper	upstream_gene_variant	intergenic	intergenic	intergenic
P51	3R	22852321	G	A	C>T	0.2	0.4	varscan2,somaticsniper	upstream_gene_variant	intergenic	intergenic	intergenic
P51	3R	24872965	C	A	C>A	0.324	0.648	mutect2,varscan2,somaticsniper,strelka,freebayes	missense_variant	exon_5	CG3744	FBgn0039240
P51	3R	25649913	T	C	T>C	0.167	0.334	mutect2,varscan2,somaticsniper,strelka	synonymous_variant	exon	jigr1	FBgn0039350
P51	3R	29444366	T	C	T>C	0.333	0.666	varscan2,somaticsniper	intron_variant	intron	Ptp99A	FBgn0004369
P51	3R	29839131	C	T	C>T	0.235	0.47	varscan2,somaticsniper	upstream_gene_variant	intergenic	intergenic	intergenic
P51	X	3909029	C	T	C>T	0.25	0.25	somaticsniper,strelka	intron_variant	intron	CG42541	FBgn0260658
P51	X	4698672	G	C	C>G	0.333	0.333	varscan2,somaticsniper	3_prime_UTR_variant	3UTR	ctp	FBgn0011760
P51	X	8337198	T	C	T>C	0.5	0.5	mutect2,varscan2,somaticsniper,strelka,freebayes	intron_variant	intron	nAChRalpha3	FBgn0015519
P51	X	9870240	A	G	T>C	0.226	0.226	somaticsniper,strelka	upstream_gene_variant	intergenic	intergenic	intergenic
P53	2L	2091023	A	C	T>G	0.19	0.38	varscan2,somaticsniper	intron_variant	intron	dpr3	FBgn0053516
P53	2L	3273116	C	G	C>G	0.194	0.388	somaticsniper,strelka	downstream_gene_variant	intergenic	intergenic	intergenic
P53	2L	6167080	T	C	T>C	0.185	0.37	varscan2,somaticsniper	intergenic_region	intergenic	intergenic	intergenic
P53	2L	6167082	G	A	C>T	0.192	0.384	varscan2,somaticsniper	intergenic_region	intergenic	intergenic	intergenic
P53	2L	7087623	T	C	T>C	0.533	1	somaticsniper,strelka	upstream_gene_variant	intergenic	intergenic	intergenic
P53	2L	15098595	G	A	C>T	0.25	0.5	varscan2,somaticsniper	downstream_gene_variant	intergenic	intergenic	intergenic
P53	2R	883623	C	T	C>T	0.278	0.556	somaticsniper,strelka	intergenic_region	intergenic	intergenic	intergenic
P53	2R	6289587	A	G	T>C	0.266	0.532	somaticsniper,strelka	intergenic_region	intergenic	intergenic	intergenic
P53	2R	7257037	G	A	C>T	0.264	0.528	mutect2,varscan2,somaticsniper,strelka,freebayes	downstream_gene_variant	intergenic	intergenic	intergenic
P53	2R	13342972	T	C	T>C	0.184	0.368	varscan2,somaticsniper	intron_variant	ncRNA	CR44206	FBgn0265104
P53	2R	14727499	G	A	C>T	0.238	0.476	somaticsniper,strelka	intergenic_region	intergenic	intergenic	intergenic
P53	2R	22786439	A	G	T>C	0.25	0.5	varscan2,somaticsniper	downstream_gene_variant	intron	CG42260	FBgn0259145
P53	2R	23664082	T	A	T>A	0.3	0.6	varscan2,somaticsniper	upstream_gene_variant	intron	Pde8	FBgn0266377
P53	2R	24470943	T	C	T>C	0.267	0.534	somaticsniper,strelka	upstream_gene_variant	intron	CG13579	FBgn0035010
P53	3L	1260538	G	T	C>A	0.229	0.458	varscan2,somaticsniper	downstream_gene_variant	intron	tfc	FBgn0035199
P53	3L	3278139	G	A	C>T	0.25	0.5	somaticsniper,strelka	upstream_gene_variant	intergenic	intergenic	intergenic
P53	3L	3691411	T	A	T>A	0.283	0.566	freebayes	downstream_gene_variant	intergenic	intergenic	intergenic
P53	3L	10714282	G	C	C>G	0.227	0.454	varscan2,somaticsniper	intergenic_region	intergenic	intergenic	intergenic
P53	3L	11964108	C	G	C>G	0.255	0.51	somaticsniper,strelka	missense_variant	exon_6	prc	FBgn0028573
P53	3L	12879297	C	T	C>T	0.185	0.37	somaticsniper,strelka	intergenic_region	intergenic	intergenic	intergenic
P53	3L	18760552	G	A	C>T	0.283	0.566	freebayes	intron_variant	intron	ftz-f1	FBgn0001078
P53	3L	24657894	A	C	T>G	0.341	0.682	somaticsniper,strelka	intergenic_region	intergenic	intergenic	intergenic
P53	3R	13670401	G	T	C>A	0.171	0.342	varscan2,somaticsniper	downstream_gene_variant	intron	Task6	FBgn0038165
P53	3R	18096754	T	A	T>A	0.233	0.466	varscan2,somaticsniper	intron_variant	intron	sr	FBgn0003499
P53	3R	21790680	G	T	C>A	0.0789	0.1578	mutect2,strelka	upstream_gene_variant	intron	CASK	FBgn0013759
P53	3R	23502615	C	A	C>A	0.25	0.5	varscan2,somaticsniper	downstream_gene_variant	intergenic	intergenic	intergenic
P53	3R	25400047	C	A	C>A	0.188	0.376	somaticsniper,strelka	synonymous_variant	exon	Muc96D	FBgn0051439
P53	3R	25400056	A	T	T>A	0.191	0.382	somaticsniper,strelka	synonymous_variant	exon	Muc96D	FBgn0051439
P53	3R	30927854	T	G	T>G	0.163	0.326	varscan2,somaticsniper	intron_variant	intron	Ptx1	FBgn0020912
P53	X	1995974	G	A	C>T	0.405	0.405	varscan2,somaticsniper	intron_variant	intron	Hr4	FBgn0264562
P53	X	3909029	C	T	C>T	0.25	0.25	somaticsniper,strelka	intron_variant	intron	CG42541	FBgn0260658
P53	X	8029264	A	T	T>A	0.214	0.214	varscan2,somaticsniper	downstream_gene_variant	intergenic	intergenic	intergenic
P53	X	13728113	A	T	T>A	0.348	0.348	varscan2,somaticsniper	synonymous_variant	exon	g	FBgn0001087
P53	X	19259072	G	A	C>T	0.0952	0.0952	mutect2,strelka	synonymous_variant	exon_3	rictor	FBgn0031006
P53	X	21781887	A	G	T>C	0.314	0.314	somaticsniper,strelka	intron_variant	ncRNA	flam	FBgn0267704
P53	X	21781888	T	A	T>A	0.314	0.314	somaticsniper,strelka	intron_variant	ncRNA	flam	FBgn0267704
P55	2L	582243	A	G	T>C	0.333	0.666	somaticsniper,strelka	downstream_gene_variant	intergenic	intergenic	intergenic
P55	2L	3748889	C	G	C>G	0.385	0.77	mutect2,somaticsniper,strelka,freebayes	intron_variant	intron	CG10019	FBgn0031568
P55	2L	4064100	C	T	C>T	0.278	0.556	somaticsniper,strelka	intron_variant	intron	ed	FBgn0000547
P55	2L	4064106	C	T	C>T	0.278	0.556	somaticsniper,strelka	intron_variant	intron	ed	FBgn0000547
P55	2L	6055255	C	A	C>A	0.216	0.432	varscan2,somaticsniper	downstream_gene_variant	intron	CG13995	FBgn0031770
P55	2L	6691176	T	G	T>G	0.2	0.4	varscan2,somaticsniper	upstream_gene_variant	intron	Tsp	FBgn0031850
P55	2L	9380276	A	T	T>A	0.273	0.546	varscan2,somaticsniper,strelka	intron_variant	intron	Shawl	FBgn0085395
P55	2L	10628883	A	G	T>C	0.182	0.364	varscan2,somaticsniper	downstream_gene_variant	intergenic	intergenic	intergenic
P55	2L	17287321	T	C	T>C	0.206	0.412	somaticsniper,strelka	synonymous_variant	exon	CG15140	FBgn0032631
P55	2R	10928425	A	G	T>C	0.208	0.416	varscan2,somaticsniper	intergenic_region	intergenic	intergenic	intergenic
P55	2R	11734225	A	G	T>C	0.316	0.632	somaticsniper,strelka	intergenic_region	intergenic	intergenic	intergenic
P55	2R	20722273	G	T	C>A	0.35	0.7	mutect2,varscan2,somaticsniper,strelka,freebayes	upstream_gene_variant	intron	dpr1	FBgn0040726
P55	2R	23747706	G	C	C>G	0.265	0.53	somaticsniper,strelka	synonymous_variant	exon	CG13560	FBgn0034899
P55	3L	2428309	T	A	T>A	0.273	0.546	freebayes	upstream_gene_variant	intron	CG45186	FBgn0266696
P55	3L	4948434	T	C	T>C	0.286	0.572	varscan2,somaticsniper	intron_variant	intron	Con	FBgn0005775
P55	3L	5483177	G	A	C>T	0.179	0.358	somaticsniper,strelka	synonymous_variant	exon	CG4835	FBgn0035607
P55	3L	8845652	T	G	T>G	0.185	0.37	somaticsniper,strelka	intron_variant	ncRNA	CR45823	FBgn0267473
P55	3L	18756001	G	A	C>T	0.238	0.476	somaticsniper,strelka	upstream_gene_variant	intron	ftz-f1	FBgn0001078
P55	3L	18756002	A	T	T>A	0.238	0.476	varscan2,strelka	upstream_gene_variant	intron	ftz-f1	FBgn0001078
P55	3R	4971279	A	T	T>A	0.25	0.5	somaticsniper,strelka	downstream_gene_variant	intergenic	intergenic	intergenic
P55	3R	8167712	C	T	C>T	0.273	0.546	mutect2,somaticsniper,strelka	intron_variant	intron	grn	FBgn0001138
P55	3R	8167715	C	T	C>T	0.25	0.5	mutect2,strelka	intron_variant	intron	grn	FBgn0001138
P55	3R	12571427	G	A	C>T	0.37	0.74	mutect2,somaticsniper,strelka	intron_variant	intron	Octbeta2R	FBgn0038063
P55	3R	18468070	T	C	T>C	0.227	0.454	mutect2,somaticsniper	intron_variant	intron	fru	FBgn0004652
P55	3R	19816799	C	A	C>A	0.375	0.75	varscan2,somaticsniper,strelka	intron_variant	intron	bnl	FBgn0014135
P55	3R	22069875	A	T	T>A	0.238	0.476	somaticsniper,strelka	intron_variant	intron	how	FBgn0264491
P55	3R	23198088	G	A	C>T	0.4	0.8	somaticsniper,strelka	upstream_gene_variant	intron	cnc	FBgn0262975
P55	3R	23198089	G	A	C>T	0.4	0.8	varscan2,somaticsniper,strelka	upstream_gene_variant	intron	cnc	FBgn0262975
P55	3R	23396304	A	G	T>C	0.222	0.444	varscan2,somaticsniper	downstream_gene_variant	intergenic	intergenic	intergenic
P55	3R	23763750	C	A	C>A	0.5	1	somaticsniper,strelka	upstream_gene_variant	intergenic	intergenic	intergenic
P55	3R	31144935	G	T	C>A	0.25	0.5	mutect2,varscan2,somaticsniper,strelka	intron_variant	intron	Gycbeta100B	FBgn0013973
P55	3R	31370047	T	C	T>C	0.162	0.324	varscan2,somaticsniper	upstream_gene_variant	intron	CG34347	FBgn0085376
P55	X	11601016	C	T	C>T	0.85	0.85	mutect2,varscan2,somaticsniper,strelka,freebayes	downstream_gene_variant	intron	rho-4	FBgn0030318
P55	X	20889492	C	T	C>T	0.8	0.8	mutect2,varscan2,somaticsniper,strelka,freebayes	intron_variant	intron	shakB	FBgn0085387
P57	2L	1615465	C	A	C>A	0.294	0.588	somaticsniper,strelka	upstream_gene_variant	intergenic	intergenic	intergenic
P57	2L	2828980	T	C	T>C	0.324	0.648	mutect2,somaticsniper,strelka,freebayes	upstream_gene_variant	intron	Duox	FBgn0283531
P57	2L	4647640	C	A	C>A	0.312	0.624	freebayes	missense_variant	exon	CG43798	FBgn0264342
P57	2L	7132797	G	A	C>T	0.222	0.444	varscan2,somaticsniper	missense_variant	exon_1	Pvf3	FBgn0085407
P57	2L	8327571	C	A	C>A	0.312	0.624	freebayes	5_prime_UTR_variant	exon_1	CG14275	FBgn0032022
P57	2L	9836325	C	A	C>A	0.261	0.522	somaticsniper,strelka	intron_variant	intron	nAChRalpha6	FBgn0032151
P57	2L	12386894	G	A	C>T	0.173	0.346	mutect2,somaticsniper	intron_variant	intron	bru2	FBgn0262475
P57	2L	12409191	G	A	C>T	0.462	0.924	somaticsniper,strelka	upstream_gene_variant	intron	vir-1	FBgn0043841
P57	2L	17287321	T	C	T>C	0.171	0.342	varscan2,somaticsniper	synonymous_variant	exon	CG15140	FBgn0032631
P57	2L	19642515	A	G	T>C	0.318	0.636	varscan2,somaticsniper	intron_variant	ncRNA	CR44979	FBgn0266314
P57	2L	22200551	C	T	C>T	0.24	0.48	somaticsniper,strelka	upstream_gene_variant	intron	Ir40a	FBgn0259683
P57	2R	1522418	G	T	C>A	0.133	0.266	varscan2,somaticsniper	upstream_gene_variant	intron	Maf1	FBgn0267861
P57	2R	5301776	A	T	T>A	0.194	0.388	somaticsniper,strelka	intergenic_region	intergenic	intergenic	intergenic
P57	2R	5301777	C	A	C>A	0.194	0.388	somaticsniper,strelka	intergenic_region	intergenic	intergenic	intergenic
P57	2R	8012648	C	T	C>T	0.305	0.61	mutect2,varscan2,somaticsniper,strelka,freebayes	synonymous_variant	exon_2	CG14762	FBgn0033250
P57	2R	14319638	T	C	T>C	0.385	0.77	somaticsniper,strelka	intron_variant	intron	Shroom	FBgn0085408
P57	2R	15001459	A	C	T>G	0.333	0.666	varscan2,somaticsniper	intergenic_region	intergenic	intergenic	intergenic
P57	2R	16577699	T	A	T>A	0.357	0.714	somaticsniper,strelka	upstream_gene_variant	intergenic	intergenic	intergenic
P57	2R	16577707	G	A	C>T	0.345	0.69	somaticsniper,strelka	upstream_gene_variant	intergenic	intergenic	intergenic
P57	2R	19990567	C	G	C>G	0.171	0.342	varscan2,somaticsniper	intergenic_region	intergenic	intergenic	intergenic
P57	2R	22648550	A	C	T>G	0.273	0.546	somaticsniper,strelka	upstream_gene_variant	intergenic	intergenic	intergenic
P57	2R	23643866	G	A	C>T	0.162	0.324	somaticsniper,strelka	upstream_gene_variant	intron	retn	FBgn0004795
P57	3L	681823	C	G	C>G	0.308	0.616	somaticsniper,strelka	upstream_gene_variant	intron	CG3386	FBgn0035152
P57	3L	1409681	T	C	T>C	0.286	0.572	somaticsniper,strelka	upstream_gene_variant	intron	Ptp61F	FBgn0267487
P57	3L	1658068	G	T	C>A	0.191	0.382	somaticsniper,strelka	synonymous_variant	exon_8	CG7971	FBgn0035253
P57	3L	3641973	C	G	C>G	0.19	0.38	varscan2,somaticsniper	intron_variant	intron	dar1	FBgn0263239
P57	3L	5509669	T	C	T>C	0.184	0.368	somaticsniper,strelka	downstream_gene_variant	intron	CG34342	FBgn0085371
P57	3L	5572224	A	G	T>C	0.227	0.454	somaticsniper,strelka	upstream_gene_variant	intron	Msr-110	FBgn0015766
P57	3L	6276318	C	A	C>A	0.25	0.5	varscan2,somaticsniper	3_prime_UTR_variant	3UTR	CG43168	FBgn0262787
P57	3L	6276327	A	C	T>G	0.195	0.39	varscan2,somaticsniper	3_prime_UTR_variant	3UTR	CG43168	FBgn0262787
P57	3L	8716319	G	T	C>A	0.24	0.48	somaticsniper,strelka	downstream_gene_variant	intergenic	intergenic	intergenic
P57	3L	9602765	G	A	C>T	0.0577	0.1154	mutect2,strelka	upstream_gene_variant	intron	CG46121	FBgn0267796
P57	3L	11477725	T	A	T>A	0.227	0.454	varscan2,somaticsniper	upstream_gene_variant	intergenic	intergenic	intergenic
P57	3L	11555669	C	A	C>A	0.391	0.782	mutect2,varscan2,somaticsniper,strelka,freebayes	upstream_gene_variant	intron	Mob2	FBgn0259481
P57	3L	17163990	G	A	C>T	0.167	0.334	somaticsniper,strelka	upstream_gene_variant	intron	Rbp6	FBgn0260943
P57	3L	17470333	T	A	T>A	0.263	0.526	varscan2,somaticsniper	5_prime_UTR_variant	5UTR	CG7589	FBgn0036727
P57	3R	7195761	A	G	T>C	0.209	0.418	varscan2,somaticsniper	synonymous_variant	exon_12	lap	FBgn0086372
P57	3R	9818655	T	A	T>A	0.267	0.534	varscan2,somaticsniper,strelka	upstream_gene_variant	intergenic	intergenic	intergenic
P57	3R	9818660	T	C	T>C	0.36	0.72	somaticsniper,strelka	upstream_gene_variant	intergenic	intergenic	intergenic
P57	3R	10181887	G	A	C>T	0.194	0.388	varscan2,somaticsniper,strelka	intron_variant	intron	CG12814	FBgn0037796
P57	3R	17942368	C	T	C>T	0.409	0.818	mutect2,varscan2,somaticsniper,strelka,freebayes	upstream_gene_variant	intron	cpo	FBgn0263995
P57	3R	20977761	C	G	C>G	0.294	0.588	varscan2,somaticsniper	upstream_gene_variant	intergenic	intergenic	intergenic
P57	3R	22567794	A	T	T>A	0.24	0.48	somaticsniper,strelka	upstream_gene_variant	intergenic	intergenic	intergenic
P57	3R	22567795	C	T	C>T	0.24	0.48	somaticsniper,strelka	upstream_gene_variant	intergenic	intergenic	intergenic
P57	3R	22594720	T	C	T>C	0.176	0.352	varscan2,somaticsniper	intron_variant	intron	Efa6	FBgn0051158
P57	3R	23182601	G	A	C>T	0.28	0.56	somaticsniper,strelka	upstream_gene_variant	intron	Irk1	FBgn0265042
P57	3R	23182602	G	A	C>T	0.28	0.56	somaticsniper,strelka	upstream_gene_variant	intron	Irk1	FBgn0265042
P57	3R	24596728	G	A	C>T	0.222	0.444	somaticsniper,strelka	intron_variant	intron	mld	FBgn0263490
P57	3R	24596734	G	C	C>G	0.276	0.552	somaticsniper,strelka	intron_variant	intron	mld	FBgn0263490
P57	3R	25528088	T	C	T>C	0.217	0.434	somaticsniper,strelka	intron_variant	intron	msi	FBgn0011666
P57	3R	28842160	T	G	T>G	0.185	0.37	somaticsniper,strelka	upstream_gene_variant	intron	Apc	FBgn0015589
P57	3R	29551790	A	G	T>C	0.261	0.522	varscan2,somaticsniper	upstream_gene_variant	intergenic	intergenic	intergenic
P57	3R	29551793	C	G	C>G	0.24	0.48	varscan2,somaticsniper	upstream_gene_variant	intergenic	intergenic	intergenic
P57	3R	31152358	C	A	C>A	0.192	0.384	somaticsniper,strelka	intron_variant	intron	Gycbeta100B	FBgn0013973
P57	3R	32010039	A	C	T>G	0.462	0.924	somaticsniper,strelka	upstream_gene_variant	intron	heph	FBgn0011224
P59	2L	3056529	G	A	C>T	0.238	0.476	mutect2,varscan2,somaticsniper,strelka	upstream_gene_variant	intergenic	intergenic	intergenic
P59	2L	4865534	A	G	T>C	0.3	0.6	varscan2,somaticsniper	missense_variant	exon_3	smog	FBgn0051660
P59	2L	4865539	A	T	T>A	0.286	0.572	varscan2,somaticsniper	synonymous_variant	exon_3	smog	FBgn0051660
P59	2L	6697142	C	A	C>A	0.238	0.476	somaticsniper,strelka	intron_variant	intron	Tsp	FBgn0031850
P59	2L	13601567	T	G	T>G	0.182	0.364	mutect2,somaticsniper,strelka	upstream_gene_variant	intron	kuz	FBgn0259984
P59	2L	15759030	G	C	C>G	0.286	0.572	mutect2,varscan2,somaticsniper,strelka,freebayes	missense_variant	exon_5	Gli	FBgn0001987
P59	2L	19042233	T	C	T>C	0.281	0.562	varscan2,somaticsniper,strelka	synonymous_variant	exon_1	Catsup	FBgn0002022
P59	2L	19042236	T	C	T>C	0.273	0.546	varscan2,somaticsniper,strelka	synonymous_variant	exon_1	Catsup	FBgn0002022
P59	2L	19080053	G	T	C>A	0.25	0.5	varscan2,somaticsniper	3_prime_UTR_variant	3UTR	Lim3	FBgn0002023
P59	2L	19080057	C	T	C>T	0.188	0.376	varscan2,somaticsniper	3_prime_UTR_variant	3UTR	Lim3	FBgn0002023
P59	2L	19272486	G	A	C>T	0.25	0.5	somaticsniper,strelka	intron_variant	ncRNA	CR44190	FBgn0265079
P59	2R	7911233	A	G	T>C	0.292	0.584	somaticsniper,strelka	downstream_gene_variant	intron	CG30377	FBgn0050377
P59	2R	16981497	T	C	T>C	0.381	0.762	somaticsniper,strelka	intron_variant	intron	Cbp53E	FBgn0004580
P59	2R	19153878	A	C	T>G	0.364	0.728	somaticsniper,strelka	upstream_gene_variant	intron	ena	FBgn0000578
P59	2R	22002769	A	G	T>C	0.258	0.516	somaticsniper,strelka	intron_variant	intron	CG34370	FBgn0085399
P59	2R	22293239	T	G	T>G	0.273	0.546	varscan2,somaticsniper	upstream_gene_variant	intergenic	intergenic	intergenic
P59	3L	729950	G	T	C>A	0.24	0.48	somaticsniper,strelka	intergenic_region	intergenic	intergenic	intergenic
P59	3L	1684879	A	G	T>C	0.286	0.572	varscan2,somaticsniper	upstream_gene_variant	intron	CG7991	FBgn0035260
P59	3L	2426399	T	C	T>C	0.25	0.5	varscan2,somaticsniper	upstream_gene_variant	intron	CG45186	FBgn0266696
P59	3L	3831978	G	A	C>T	0.185	0.37	varscan2,somaticsniper	synonymous_variant	exon_3	enc	FBgn0004875
P59	3L	4311526	T	C	T>C	0.333	0.666	mutect2,varscan2,somaticsniper,strelka,freebayes	upstream_gene_variant	intergenic	intergenic	intergenic
P59	3L	5572224	A	G	T>C	0.286	0.572	somaticsniper,strelka	upstream_gene_variant	intron	Msr-110	FBgn0015766
P59	3L	7997648	T	C	T>C	0.258	0.516	somaticsniper,strelka	intron_variant	intron	nmo	FBgn0011817
P59	3L	10631008	A	G	T>C	0.222	0.444	somaticsniper,strelka	upstream_gene_variant	intergenic	intergenic	intergenic
P59	3L	12240081	A	T	T>A	0.304	0.608	somaticsniper,strelka	intron_variant	intron	app	FBgn0260941
P59	3L	12240093	G	A	C>T	0.346	0.692	somaticsniper,strelka	intron_variant	intron	app	FBgn0260941
P59	3L	12249655	T	C	T>C	0.2	0.4	somaticsniper,strelka	upstream_gene_variant	intron	app	FBgn0260941
P59	3L	17156789	T	C	T>C	0.0789	0.1578	mutect2,strelka	intron_variant	intron	Rbp6	FBgn0260943
P59	3L	18161907	G	T	C>A	0.375	0.75	somaticsniper,strelka	intron_variant	intron	CG13699	FBgn0036781
P59	3L	18161908	C	T	C>T	0.346	0.692	somaticsniper,strelka	intron_variant	intron	CG13699	FBgn0036781
P59	3R	2835848	C	T	C>T	0.172	0.344	somaticsniper,strelka	intron_variant	intron	Pzl	FBgn0267430
P59	3R	2835849	T	A	T>A	0.172	0.344	somaticsniper,strelka	intron_variant	intron	Pzl	FBgn0267430
P59	3R	10491217	T	C	T>C	0.185	0.37	somaticsniper,strelka	upstream_gene_variant	intergenic	intergenic	intergenic
P59	3R	18462202	T	C	T>C	0.138	0.276	mutect2,strelka	intron_variant	intron	fru	FBgn0004652
P59	3R	18575676	T	C	T>C	0.179	0.358	varscan2,somaticsniper	intron_variant	intron	fray	FBgn0023083
P59	3R	20453520	A	C	T>G	0.192	0.384	varscan2,somaticsniper	upstream_gene_variant	intron	Gfrl	FBgn0262869
P59	3R	27858887	C	A	C>A	0.263	0.526	somaticsniper,strelka	intron_variant	intron	CG34353	FBgn0085382
P59	3R	28357502	G	A	C>T	0.2	0.4	varscan2,somaticsniper	downstream_gene_variant	intergenic	intergenic	intergenic
P59	3R	30055642	C	T	C>T	0.31	0.62	mutect2,varscan2,somaticsniper,strelka,freebayes	missense_variant	exon	spn-A	FBgn0003479
P59	3R	30795290	T	G	T>G	0.333	0.666	varscan2,somaticsniper	upstream_gene_variant	intron	wts	FBgn0011739
P59	X	10153827	G	T	C>A	0.167	0.167	mutect2,varscan2,strelka	missense_variant	exon_1	CG12645	FBgn0030181
P59	X	14469766	A	G	T>C	0.227	0.227	somaticsniper,strelka	downstream_gene_variant	intergenic	intergenic	intergenic
P61	2L	7152845	C	T	C>T	0.238	0.476	somaticsniper,strelka	intron_variant	intron	Pvf3	FBgn0085407
P61	2L	8851968	T	G	T>G	0.444	0.888	somaticsniper,strelka	downstream_gene_variant	intergenic	intergenic	intergenic
P61	2L	10679187	A	G	T>C	0.286	0.572	somaticsniper,strelka	synonymous_variant	exon	CG17104	FBgn0040496
P61	2L	12647551	C	G	C>G	0.269	0.538	varscan2,somaticsniper	upstream_gene_variant	intergenic	intergenic	intergenic
P61	2R	11073024	A	C	T>G	0.31	0.62	varscan2,somaticsniper	intron_variant	intron	luna	FBgn0040765
P61	2R	11099000	T	C	T>C	0.227	0.454	varscan2,somaticsniper	intron_variant	intron	luna	FBgn0040765
P61	2R	13909529	C	A	C>A	0.261	0.522	varscan2,somaticsniper	intron_variant	intron	shot	FBgn0013733
P61	2R	15230721	A	C	T>G	0.364	0.728	somaticsniper,strelka	intron_variant	exon_5	CR44370	FBgn0265508
P61	2R	15909351	A	C	T>G	0.222	0.444	somaticsniper,strelka	intron_variant	intron	sli	FBgn0264089
P61	2R	16037270	G	T	C>A	0.368	0.736	varscan2,somaticsniper	intron_variant	intron	SP2353	FBgn0034070
P61	2R	17882447	T	A	T>A	0.273	0.546	somaticsniper,strelka	upstream_gene_variant	intron	Elk	FBgn0011589
P61	2R	20112951	T	A	T>A	0.526	1	mutect2,varscan2,somaticsniper,strelka,freebayes	missense_variant	exon	18w	FBgn0004364
P61	2R	20573433	A	T	T>A	0.286	0.572	varscan2,somaticsniper	intron_variant	intron	qsm	FBgn0028622
P61	2R	21458026	C	T	C>T	0.231	0.462	varscan2,somaticsniper	intron_variant	intron	Sdc	FBgn0010415
P61	2R	23827542	T	A	T>A	0.545	1	somaticsniper,strelka	upstream_gene_variant	intron	CG5549	FBgn0034911
P61	3L	2748023	G	T	C>A	0.353	0.706	varscan2,somaticsniper	intron_variant	intron	Mrtf	FBgn0052296
P61	3L	7647417	C	G	C>G	0.536	1	mutect2,varscan2,somaticsniper,strelka,freebayes	upstream_gene_variant	intergenic	intergenic	intergenic
P61	3L	13090422	C	T	C>T	0.273	0.546	varscan2,somaticsniper	upstream_gene_variant	intergenic	intergenic	intergenic
P61	3L	16162679	A	T	T>A	0.308	0.616	somaticsniper,strelka	intron_variant	intron	CG5151	FBgn0036576
P61	3R	973276	A	T	T>A	0.429	0.858	somaticsniper,strelka	intron_variant	intron	Myo81F	FBgn0267431
P61	3R	14285559	G	A	C>T	0.273	0.546	somaticsniper,strelka	upstream_gene_variant	intron	trx	FBgn0003862
P61	3R	15600095	T	G	T>G	0.286	0.572	mutect2,somaticsniper,strelka	intergenic_region	intergenic	intergenic	intergenic
P61	3R	16990262	T	C	T>C	0.25	0.5	somaticsniper,strelka	3_prime_UTR_variant	3UTR	MESK4	FBgn0043069
P61	3R	18173983	T	A	T>A	0.182	0.364	varscan2,somaticsniper	synonymous_variant	exon_2	PP2A-B'	FBgn0042693
P61	3R	19148409	G	T	C>A	0.538	1	mutect2,varscan2,somaticsniper,strelka	upstream_gene_variant	intergenic	intergenic	intergenic
P61	3R	19732966	A	T	T>A	0.219	0.438	varscan2,somaticsniper	intron_variant	intron	GluClalpha	FBgn0024963
P61	Y	2841717	T	A	T>A	0.304	0.304	somaticsniper,strelka	intergenic_region	intergenic	intergenic	intergenic
P61	Y	2841718	T	C	T>C	0.304	0.304	somaticsniper,strelka	intergenic_region	intergenic	intergenic	intergenic
P63	2L	2731607	C	A	C>A	0.25	0.5	somaticsniper,strelka	upstream_gene_variant	intron	CG31689	FBgn0031449
P63	2L	2731608	A	T	T>A	0.268	0.536	varscan2,somaticsniper,strelka	upstream_gene_variant	intron	CG31689	FBgn0031449
P63	2L	4705241	G	A	C>T	0.278	0.556	somaticsniper,strelka	upstream_gene_variant	intron	CG34351	FBgn0085380
P63	2L	6740777	T	G	T>G	0.333	0.666	somaticsniper,strelka	upstream_gene_variant	intergenic	intergenic	intergenic
P63	2L	7565765	T	G	T>G	0.217	0.434	varscan2,somaticsniper	upstream_gene_variant	intron	RapGAP1	FBgn0264895
P63	2L	23038946	A	T	T>A	0.25	0.5	somaticsniper,strelka	intergenic_region	intergenic	intergenic	intergenic
P63	2R	13468708	T	G	T>G	0.194	0.388	varscan2,somaticsniper	intron_variant	intron	arr	FBgn0000119
P63	2R	14490567	A	C	T>G	0.212	0.424	varscan2,somaticsniper	intron_variant	intron	PRAS40	FBgn0267824
P63	2R	15005993	T	G	T>G	0.327	0.654	varscan2,somaticsniper	intergenic_region	intergenic	intergenic	intergenic
P63	2R	19822747	G	T	C>A	0.195	0.39	varscan2,somaticsniper	upstream_gene_variant	intergenic	intergenic	intergenic
P63	2R	21235451	C	G	C>G	0.184	0.368	somaticsniper,strelka	intron_variant	intron	ASPP	FBgn0034606
P63	2R	22213843	G	A	C>T	0.282	0.564	somaticsniper,strelka	upstream_gene_variant	intron	ari-2	FBgn0025186
P63	2R	23421448	G	A	C>T	0.24	0.48	somaticsniper,strelka	upstream_gene_variant	intergenic	intergenic	intergenic
P63	3L	2380022	A	G	T>C	0.171	0.342	somaticsniper,strelka	upstream_gene_variant	intron	CG45186	FBgn0266696
P63	3L	4383382	G	A	C>T	0.217	0.434	somaticsniper,strelka	upstream_gene_variant	intergenic	intergenic	intergenic
P63	3L	4617082	G	T	C>A	0.226	0.452	somaticsniper,strelka	upstream_gene_variant	intron	Src64B	FBgn0262733
P63	3L	4617083	T	G	T>G	0.226	0.452	varscan2,somaticsniper,strelka	upstream_gene_variant	intron	Src64B	FBgn0262733
P63	3L	6835945	C	T	C>T	0.25	0.5	somaticsniper,strelka	intergenic_region	intergenic	intergenic	intergenic
P63	3L	6835946	A	C	T>G	0.25	0.5	somaticsniper,strelka	intergenic_region	intergenic	intergenic	intergenic
P63	3L	12656053	G	A	C>T	0.143	0.286	varscan2,somaticsniper	upstream_gene_variant	intergenic	intergenic	intergenic
P63	3L	13614181	C	T	C>T	0.326	0.652	varscan2,somaticsniper	intron_variant	intron	bru3	FBgn0264001
P63	3R	7074668	T	C	T>C	0.188	0.376	varscan2,somaticsniper	upstream_gene_variant	intergenic	intergenic	intergenic
P63	3R	14688231	G	A	C>T	0.16	0.32	somaticsniper,strelka	intron_variant	intron	Meltrin	FBgn0265140
P63	3R	16369373	T	C	T>C	0.32	0.64	somaticsniper,strelka	splice_region_variant	3UTR	CG10317	FBgn0038423
P63	3R	19506783	G	T	C>A	0.246	0.492	varscan2,somaticsniper	upstream_gene_variant	intron	Dys	FBgn0260003
P63	3R	22891810	A	G	T>C	0.412	0.824	varscan2,somaticsniper	intergenic_region	intergenic	intergenic	intergenic
P63	3R	23083810	T	C	T>C	0.207	0.414	somaticsniper,strelka	intron_variant	intron	Cow	FBgn0039054
P63	3R	23499085	A	G	T>C	0.167	0.334	varscan2,somaticsniper	intergenic_region	intergenic	intergenic	intergenic
P63	3R	25190186	G	C	C>G	0.22	0.44	varscan2,somaticsniper	missense_variant	exon	dan	FBgn0039286
P63	3R	26981652	A	T	T>A	0.133	0.266	mutect2,strelka	5_prime_UTR_variant	5UTR	CG14253	FBgn0039467
P63	3R	27840704	A	G	T>C	0.25	0.5	varscan2,somaticsniper	upstream_gene_variant	intron	CG34353	FBgn0085382
P63	3R	27840707	C	G	C>G	0.205	0.41	varscan2,somaticsniper	upstream_gene_variant	intron	CG34353	FBgn0085382
P63	3R	29181533	C	G	C>G	0.154	0.308	varscan2,somaticsniper	missense_variant	exon_2	CG14509	FBgn0039647
P63	3R	29551790	A	G	T>C	0.188	0.376	varscan2,somaticsniper	upstream_gene_variant	intergenic	intergenic	intergenic
P63	3R	29880337	C	T	C>T	0.229	0.458	varscan2,somaticsniper	intron_variant	intron	CG31038	FBgn0051038
P63	3R	30095376	C	G	C>G	0.195	0.39	somaticsniper,strelka	upstream_gene_variant	intron	sima	FBgn0266411
P63	3R	31428325	C	A	C>A	0.286	0.572	somaticsniper,strelka	intron_variant	intron	Gprk2	FBgn0261988
P63	X	4171169	T	C	T>C	0.219	0.219	varscan2,somaticsniper	intron_variant	intron	Fas2	FBgn0000635
P63	Y	1975666	A	G	T>C	0.312	0.312	somaticsniper,strelka	intergenic_region	intergenic	intergenic	intergenic
P65	2L	4940854	A	G	T>C	0.305	0.61	somaticsniper,strelka	missense_variant	exon	Sgs1	FBgn0003372
P65	2L	8993217	A	C	T>G	0.167	0.334	somaticsniper,strelka	missense_variant	exon	CG9555	FBgn0032085
P65	2L	10423107	G	A	C>T	0.4	0.8	somaticsniper,strelka	upstream_gene_variant	intergenic	intergenic	intergenic
P65	2L	10423108	A	C	T>G	0.4	0.8	somaticsniper,strelka	upstream_gene_variant	intergenic	intergenic	intergenic
P65	2L	13322157	T	C	T>C	0.242	0.484	somaticsniper,strelka	intron_variant	intron	CG43778	FBgn0264308
P65	2L	13587482	A	G	T>C	0.167	0.334	mutect2,varscan2,strelka	downstream_gene_variant	intron	kuz	FBgn0259984
P65	2L	13998265	C	T	C>T	0.2	0.4	varscan2,somaticsniper	intron_variant	intron	rk	FBgn0003255
P65	2L	15068806	G	T	C>A	0.192	0.384	varscan2,strelka	synonymous_variant	intron	vig	FBgn0024183
P65	2L	18337680	A	T	T>A	0.286	0.572	varscan2,somaticsniper	intron_variant	intron	Fas3	FBgn0000636
P65	2L	19883516	G	C	C>G	0.182	0.364	varscan2,somaticsniper	intron_variant	intron	sick	FBgn0263873
P65	2L	22730614	T	A	T>A	0.359	0.718	mutect2,varscan2,somaticsniper,strelka,freebayes	intron_variant	intron	CG40006	FBgn0058006
P65	2R	4934517	T	A	T>A	0.333	0.666	somaticsniper,strelka	intron_variant	intron	Ir41a	FBgn0040849
P65	2R	4934518	T	A	T>A	0.333	0.666	somaticsniper,strelka	intron_variant	intron	Ir41a	FBgn0040849
P65	2R	5020334	G	A	C>T	0.425	0.85	mutect2,varscan2,somaticsniper,strelka,freebayes	stop_gained	exon_6	Ir41a	FBgn0040849
P65	2R	7945458	A	C	T>G	0.12	0.24	varscan2,strelka	synonymous_variant	exon	CG34431	FBgn0085460
P65	2R	10413065	T	A	T>A	0.355	0.71	somaticsniper,strelka	upstream_gene_variant	intron	CG42732	FBgn0261698
P65	2R	10583584	A	C	T>G	0.267	0.534	somaticsniper,strelka	upstream_gene_variant	intron	psq	FBgn0263102
P65	2R	13552930	C	G	C>G	0.32	0.64	somaticsniper,strelka	upstream_gene_variant	intron	CG33156	FBgn0053156
P65	2R	13552931	T	A	T>A	0.292	0.584	somaticsniper,strelka	upstream_gene_variant	intron	CG33156	FBgn0053156
P65	2R	15353520	T	G	T>G	0.25	0.5	varscan2,somaticsniper	intron_variant	intron	unc-5	FBgn0034013
P65	2R	16453106	A	G	T>C	0.185	0.37	varscan2,somaticsniper	intergenic_region	intergenic	intergenic	intergenic
P65	2R	23504437	A	G	T>C	0.281	0.562	varscan2,somaticsniper	downstream_gene_variant	intergenic	intergenic	intergenic
P65	2R	23827940	T	C	T>C	0.214	0.428	somaticsniper,strelka	upstream_gene_variant	intron	CG5549	FBgn0034911
P65	3L	5285849	G	A	C>T	0.208	0.416	varscan2,somaticsniper	intergenic_region	intergenic	intergenic	intergenic
P65	3L	5572199	A	G	T>C	0.222	0.444	varscan2,somaticsniper,strelka	upstream_gene_variant	intron	Msr-110	FBgn0015766
P65	3L	5689244	A	G	T>C	0.31	0.62	varscan2,somaticsniper	upstream_gene_variant	intron	sif	FBgn0085447
P65	3L	7790118	G	A	C>T	0.261	0.522	varscan2,somaticsniper	intron_variant	intron	CG32369	FBgn0052369
P65	3L	8376038	T	C	T>C	0.346	0.692	mutect2,varscan2,somaticsniper,strelka,freebayes	intron_variant	intron	ImpE1	FBgn0001253
P65	3L	11199227	T	C	T>C	0.179	0.358	varscan2,somaticsniper	upstream_gene_variant	intron	Plod	FBgn0036147
P65	3L	11642733	A	G	T>C	0.364	0.728	somaticsniper,strelka	3_prime_UTR_variant	3UTR	CG32091	FBgn0052091
P65	3L	18433287	C	T	C>T	0.294	0.588	varscan2,somaticsniper	intergenic_region	intergenic	intergenic	intergenic
P65	3R	2835848	C	T	C>T	0.346	0.692	somaticsniper,strelka	intron_variant	intron	Pzl	FBgn0267430
P65	3R	2835849	T	A	T>A	0.346	0.692	somaticsniper,strelka	intron_variant	intron	Pzl	FBgn0267430
P65	3R	13539016	C	G	C>G	0.308	0.616	varscan2,somaticsniper	downstream_gene_variant	intergenic	intergenic	intergenic
P65	3R	14427299	A	G	T>C	0.207	0.414	varscan2,somaticsniper	missense_variant	exon_4	cv-c	FBgn0086901
P65	3R	14823322	T	G	T>G	0.25	0.5	somaticsniper,strelka	upstream_gene_variant	intron	btsz	FBgn0266756
P65	3R	20461134	G	A	C>T	0.226	0.452	varscan2,somaticsniper	intron_variant	intron	Gfrl	FBgn0262869
P65	3R	21328797	A	G	T>C	0.381	0.762	varscan2,somaticsniper	intron_variant	intron	CG16791	FBgn0038881
P65	3R	25182533	C	A	C>A	0.286	0.572	varscan2,somaticsniper	upstream_gene_variant	intron	lobo	FBgn0083946
P65	3R	27453331	T	C	T>C	0.143	0.286	varscan2,somaticsniper	intergenic_region	intergenic	intergenic	intergenic
P65	3R	28468401	G	C	C>G	0.304	0.608	mutect2,varscan2,somaticsniper,strelka,freebayes	intron_variant	intron	beat-VI	FBgn0039584
P65	X	9129256	G	A	C>T	0.231	0.231	varscan2,somaticsniper	intron_variant	intron	fend	FBgn0030090
D1	2L	3629796	G	T	C>A	0.194	0.388	somaticsniper,strelka	intron_variant	intron	for	FBgn0000721
D1	2L	8231248	T	G	T>G	0.164	0.328	somaticsniper,strelka	upstream_gene_variant	intron	Pvr	FBgn0032006
D1	2L	10262630	C	T	C>T	0.156	0.312	varscan2,somaticsniper,strelka	3_prime_UTR_variant	3UTR	Rsf1	FBgn0011305
D1	2L	10464537	G	T	C>A	0.226	0.452	varscan2,somaticsniper,strelka,freebayes	synonymous_variant	exon_9	RluA-1	FBgn0051719
D1	2L	11697964	C	A	C>A	0.161	0.322	mutect2,varscan2,somaticsniper,strelka	downstream_gene_variant	intergenic	intergenic	intergenic
D1	2L	17268561	G	C	C>G	0.145	0.29	somaticsniper,strelka	intergenic_region	intergenic	intergenic	intergenic
D1	2L	19745327	G	A	C>T	0.213	0.426	mutect2,varscan2,somaticsniper,strelka	synonymous_variant	exon_7	CG10631	FBgn0032817
D1	2R	2666073	T	A	T>A	0.276	0.552	somaticsniper,strelka	intergenic_region	intergenic	intergenic	intergenic
D1	2R	4027857	T	G	T>G	0.205	0.41	somaticsniper,strelka	intron_variant	intron	Haspin	FBgn0046706
D1	2R	4973956	C	T	C>T	0.0649	0.1298	mutect2,strelka	intron_variant	intron	Ir41a	FBgn0040849
D1	2R	10353818	G	C	C>G	0.193	0.386	somaticsniper,strelka	missense_variant	exon	CG46298	FBgn0283625
D1	2R	10682960	T	A	T>A	0.162	0.324	varscan2,somaticsniper	intron_variant	intron	stan	FBgn0024836
D1	2R	12698452	A	G	T>C	0.169	0.338	varscan2,somaticsniper	upstream_gene_variant	intergenic	intergenic	intergenic
D1	2R	13553807	T	A	T>A	0.0577	0.1154	mutect2,strelka	upstream_gene_variant	intergenic	intergenic	intergenic
D1	2R	16035961	A	C	T>G	0.133	0.266	varscan2,strelka	intron_variant	intron	SP2353	FBgn0034070
D1	2R	20757281	A	G	T>C	0.267	0.534	varscan2,somaticsniper	downstream_gene_variant	intergenic	intergenic	intergenic
D1	2R	21703848	T	C	T>C	0.333	0.666	varscan2,somaticsniper	upstream_gene_variant	intron	HmgD	FBgn0004362
D1	3L	1140309	A	G	T>C	0.162	0.324	somaticsniper,strelka	downstream_gene_variant	intergenic	intergenic	intergenic
D1	3L	1464853	T	C	T>C	0.222	0.444	varscan2,strelka	upstream_gene_variant	intron	rho	FBgn0004635
D1	3L	3242439	C	A	C>A	0.143	0.286	mutect2,strelka	upstream_gene_variant	intergenic	intergenic	intergenic
D1	3L	7406038	T	C	T>C	0.238	0.476	varscan2,somaticsniper	upstream_gene_variant	intergenic	intergenic	intergenic
D1	3L	9103307	C	T	C>T	0.191	0.382	somaticsniper,strelka	downstream_gene_variant	intron	bol	FBgn0011206
D1	3L	17493168	T	G	T>G	0.214	0.428	somaticsniper,strelka	upstream_gene_variant	intron	Oatp74D	FBgn0036732
D1	3L	18704520	C	G	C>G	0.205	0.41	varscan2,somaticsniper	upstream_gene_variant	intergenic	intergenic	intergenic
D1	3R	6097449	C	T	C>T	0.167	0.334	varscan2,somaticsniper	downstream_gene_variant	intron	Gasp	FBgn0026077
D1	3R	9455031	A	C	T>G	0.296	0.592	varscan2,somaticsniper	3_prime_UTR_variant	3UTR	ps	FBgn0261552
D1	3R	11523799	T	C	T>C	0.154	0.308	somaticsniper,strelka	intergenic_region	intergenic	intergenic	intergenic
D1	3R	19601283	G	A	C>T	0.0702	0.1404	mutect2,strelka	missense_variant	exon_3	CG7333	FBgn0038715
D1	3R	23831723	C	G	C>G	0.176	0.352	varscan2,somaticsniper	downstream_gene_variant	intron	CG34355	FBgn0085384
D1	3R	25579313	A	T	T>A	0.156	0.312	varscan2,somaticsniper	downstream_gene_variant	intron	msi	FBgn0011666
D1	X	3567779	G	T	C>A	0.167	0.167	somaticsniper,strelka	upstream_gene_variant	intron	ppk8	FBgn0052792
D1	X	3807295	C	A	C>A	0.148	0.148	mutect2,varscan2,strelka	upstream_gene_variant	intron	fd3F	FBgn0264954
D1	X	8419000	A	C	T>G	0.526	0.526	mutect2,varscan2,somaticsniper,strelka,freebayes	upstream_gene_variant	intron	Trf2	FBgn0261793
D1	X	16762087	T	G	T>G	0.2	0.2	mutect2,strelka	intron_variant	intron	if	FBgn0001250
D1	X	16762089	T	A	T>A	0.214	0.214	mutect2,strelka	intron_variant	intron	if	FBgn0001250
D1	X	17291549	C	A	C>A	0.171	0.171	varscan2,somaticsniper	5_prime_UTR_premature_start_codon_gain_variant	5UTR	Fim	FBgn0024238
D3	2L	7961857	G	C	C>G	0.182	0.364	varscan2,somaticsniper	intron_variant	intron	Snoo	FBgn0085450
D3	2L	12105074	C	T	C>T	0	0	somaticsniper,strelka	missense_variant	exon_3	ThrRS	FBgn0027081
D3	2L	12105094	C	T	C>T	0	0	somaticsniper,strelka	synonymous_variant	exon_3	ThrRS	FBgn0027081
D3	2L	19952491	A	G	T>C	0.299	0.598	varscan2,somaticsniper	intron_variant	intron	sick	FBgn0263873
D3	2L	19952504	G	A	C>T	0.29	0.58	varscan2,somaticsniper	intron_variant	intron	sick	FBgn0263873
D3	2L	20984681	C	T	C>T	0.093	0.186	mutect2,strelka	intron_variant	intron	CG42238	FBgn0250867
D3	2R	8799816	A	T	T>A	0.278	0.556	somaticsniper,strelka	intron_variant	intron	sns	FBgn0024189
D3	2R	12772204	G	A	C>T	0.0952	0.1904	somaticsniper,strelka	intergenic_region	intergenic	intergenic	intergenic
D3	2R	14264952	T	C	T>C	0.479	0.958	somaticsniper,strelka	downstream_gene_variant	intron	CG8547	FBgn0033919
D3	2R	14264953	T	C	T>C	0.479	0.958	somaticsniper,strelka	downstream_gene_variant	intron	CG8547	FBgn0033919
D3	2R	18308078	G	A	C>T	0.206	0.412	somaticsniper,strelka	upstream_gene_variant	intron	sbb	FBgn0010575
D3	2R	20199601	G	C	C>G	0.242	0.484	varscan2,somaticsniper	intergenic_region	intergenic	intergenic	intergenic
D3	2R	20199603	G	C	C>G	0.235	0.47	varscan2,somaticsniper	intergenic_region	intergenic	intergenic	intergenic
D3	3L	870559	C	A	C>A	0.114	0.228	somaticsniper,strelka	missense_variant	exon	CG12502	FBgn0035171
D3	3L	2518432	G	A	C>T	0.351	0.702	somaticsniper,strelka	downstream_gene_variant	intron	Spn	FBgn0010905
D3	3L	6012872	C	T	C>T	0.13	0.26	mutect2,strelka	upstream_gene_variant	intron	PVRAP	FBgn0052406
D3	3L	8431218	A	T	T>A	0.238	0.476	somaticsniper,strelka	3_prime_UTR_variant	3UTR	Cbl	FBgn0020224
D3	3L	11486304	T	A	T>A	0.0769	0.1538	mutect2,strelka	upstream_gene_variant	intergenic	intergenic	intergenic
D3	3L	12661444	G	A	C>T	0.241	0.482	somaticsniper,strelka	upstream_gene_variant	intergenic	intergenic	intergenic
D3	3L	18106427	G	T	C>A	0	0	somaticsniper,strelka	upstream_gene_variant	intergenic	intergenic	intergenic
D3	3L	18106437	G	T	C>A	0	0	somaticsniper,strelka	upstream_gene_variant	intergenic	intergenic	intergenic
D3	3L	22338036	C	A	C>A	0.222	0.444	somaticsniper,strelka	intron_variant	intron	Ten-m	FBgn0004449
D3	3L	23055049	T	A	T>A	0.151	0.302	somaticsniper,strelka	intergenic_region	intergenic	intergenic	intergenic
D3	3L	23938129	A	T	T>A	0.298	0.596	mutect2,varscan2,somaticsniper,strelka,freebayes	intron_variant	intron	CG40470	FBgn0058470
D3	3R	5993328	G	T	C>A	0	0	somaticsniper,strelka	downstream_gene_variant	intergenic	intergenic	intergenic
D3	3R	8556354	A	G	T>C	0.0519	0.1038	mutect2,strelka	downstream_gene_variant	intergenic	intergenic	intergenic
D3	3R	13813157	C	T	C>T	0.0426	0.0852	mutect2,strelka	5_prime_UTR_variant	5UTR	tal-AA	FBgn0259733
D3	3R	20446910	G	A	C>T	0.0833	0.1666	mutect2,strelka	intron_variant	intron	Gfrl	FBgn0262869
D3	3R	27398530	A	T	T>A	0.177	0.354	mutect2,varscan2,somaticsniper,strelka,freebayes	intron_variant	intron	side	FBgn0016061
D3	X	5090657	A	G	T>C	0.212	0.212	somaticsniper,strelka	intron_variant	intron	rg	FBgn0266098
D3	X	5585992	T	C	T>C	0.167	0.167	somaticsniper,strelka	intergenic_region	intergenic	intergenic	intergenic
D3	X	10925544	G	C	C>G	0.219	0.219	somaticsniper,strelka	3_prime_UTR_variant	3UTR	v	FBgn0003965
D3	X	15309477	C	T	C>T	0	0	somaticsniper,strelka	intron_variant	intron	gce	FBgn0261703
D3	X	15452063	C	T	C>T	0	0	somaticsniper,strelka	synonymous_variant	exon	Ahcy13	FBgn0014455
D3	X	16236040	C	A	C>A	0.182	0.182	somaticsniper,strelka	intergenic_region	intergenic	intergenic	intergenic
D5	2L	4350445	G	A	C>T	0.189	0.378	somaticsniper,strelka	upstream_gene_variant	intergenic	intergenic	intergenic
D5	2L	8291037	C	A	C>A	0.508	1	somaticsniper,strelka	upstream_gene_variant	intron	Btk29A	FBgn0003502
D5	2L	12181518	C	A	C>A	0.204	0.408	varscan2,somaticsniper	upstream_gene_variant	intron	bru1	FBgn0000114
D5	2L	19290998	G	T	C>A	0.185	0.37	somaticsniper,strelka	intergenic_region	intergenic	intergenic	intergenic
D5	2R	12493208	A	T	T>A	0.156	0.312	varscan2,somaticsniper	upstream_gene_variant	intron	fdl	FBgn0045063
D5	2R	14281766	A	T	T>A	0.0615	0.123	mutect2,strelka	intron_variant	intron	Ih	FBgn0263397
D5	2R	16395250	G	A	C>T	0.0606	0.1212	somaticsniper,strelka	upstream_gene_variant	intron	Sema-2b	FBgn0264273
D5	2R	16912365	T	C	T>C	0.08	0.16	mutect2,strelka	intergenic_region	intergenic	intergenic	intergenic
D5	2R	19153878	A	C	T>G	0.283	0.566	somaticsniper,strelka	upstream_gene_variant	intron	ena	FBgn0000578
D5	2R	21912724	T	C	T>C	0.107	0.214	mutect2,strelka	intron_variant	intron	Fili	FBgn0085397
D5	2R	24138825	T	C	T>C	0.169	0.338	varscan2,somaticsniper	upstream_gene_variant	exon_1	CR44826	FBgn0266073
D5	3L	4836780	A	C	T>G	0.429	0.858	somaticsniper,strelka	upstream_gene_variant	intergenic	intergenic	intergenic
D5	3L	4836781	A	G	T>C	0.429	0.858	somaticsniper,strelka	upstream_gene_variant	intergenic	intergenic	intergenic
D5	3L	12633614	C	A	C>A	0.151	0.302	mutect2,strelka	non_coding_transcript_exon_variant	exon_2	CR32111	FBgn0052111
D5	3L	12633619	A	G	T>C	0.147	0.294	mutect2,strelka	non_coding_transcript_exon_variant	exon_2	CR32111	FBgn0052111
D5	3L	14107842	A	T	T>A	0.476	0.952	somaticsniper,strelka	5_prime_UTR_variant	exon_1	Sox21a	FBgn0036411
D5	3L	16068297	G	A	C>T	0.0543	0.1086	mutect2,strelka	missense_variant	exon_11	Mbs	FBgn0005536
D5	3L	16454120	C	G	C>G	0.2	0.4	varscan2,somaticsniper	upstream_gene_variant	intron	CG33158	FBgn0053158
D5	3L	20816441	T	C	T>C	0.205	0.41	somaticsniper,strelka	5_prime_UTR_variant	5UTR	Pka-R1	FBgn0259243
D5	3L	25489041	T	C	T>C	0.16	0.32	somaticsniper,strelka	intron_variant	intron	CG45782	FBgn0267429
D5	3L	27086902	T	C	T>C	0.123	0.246	mutect2,strelka	upstream_gene_variant	intergenic	intergenic	intergenic
D5	3R	961424	G	C	C>G	0.137	0.274	mutect2,somaticsniper	intron_variant	intron	Myo81F	FBgn0267431
D5	3R	1527840	T	C	T>C	0.27	0.54	somaticsniper,strelka	intron_variant	intron	Myo81F	FBgn0267431
D5	3R	5772058	C	T	C>T	0.0783	0.1566	mutect2,strelka	upstream_gene_variant	intron	CG2082	FBgn0027608
D5	3R	9030300	C	T	C>T	0.162	0.324	somaticsniper,strelka	intron_variant	intron	neur	FBgn0002932
D5	3R	13820282	T	G	T>G	0.0899	0.1798	mutect2,strelka	downstream_gene_variant	intergenic	intergenic	intergenic
D5	3R	14152400	G	A	C>T	0.037	0.074	somaticsniper,strelka	synonymous_variant	exon	CG42500	FBgn0260226
D5	3R	19189747	T	C	T>C	0.0649	0.1298	mutect2,strelka	5_prime_UTR_variant	5UTR	CG31475	FBgn0051475
D5	X	9374637	T	C	T>C	0.333	0.333	somaticsniper,strelka	intron_variant	intron	mgl	FBgn0261260
D5	X	12558859	G	T	C>A	0.194	0.194	mutect2,somaticsniper,strelka	downstream_gene_variant	intron	CG43921	FBgn0264542
D7	2L	6078065	C	A	C>A	0.25	0.5	varscan2,somaticsniper	upstream_gene_variant	intergenic	intergenic	intergenic
D7	2L	8380471	T	G	T>G	0	0	somaticsniper,strelka	synonymous_variant	exon_2	AlaRS	FBgn0027094
D7	2L	12105074	C	T	C>T	0	0	somaticsniper,strelka	missense_variant	exon_3	ThrRS	FBgn0027081
D7	2L	12105094	C	T	C>T	0	0	somaticsniper,strelka	synonymous_variant	exon_3	ThrRS	FBgn0027081
D7	2L	14446228	T	C	T>C	0.212	0.424	varscan2,somaticsniper	downstream_gene_variant	intergenic	intergenic	intergenic
D7	2L	17724314	C	T	C>T	0	0	somaticsniper,strelka	intron_variant	intron	CadN	FBgn0015609
D7	2L	18462053	T	C	T>C	0.257	0.514	freebayes	intron_variant	ncRNA	let-7-C	FBgn0263049
D7	2L	21031967	G	T	C>A	0	0	somaticsniper,strelka	intron_variant	intron	CG42238	FBgn0250867
D7	2R	1535041	T	C	T>C	0.231	0.462	somaticsniper,strelka	intergenic_region	intergenic	intergenic	intergenic
D7	2R	12105300	T	A	T>A	0.176	0.352	varscan2,somaticsniper	intron_variant	intron	jeb	FBgn0086677
D7	2R	12105301	G	T	C>A	0.176	0.352	varscan2,somaticsniper	intron_variant	intron	jeb	FBgn0086677
D7	2R	14254195	G	A	C>T	0	0	somaticsniper,strelka	synonymous_variant	exon_4	Hsc70-5	FBgn0001220
D7	2R	17134446	A	G	T>C	0	0	somaticsniper,strelka	missense_variant	exon	CG11400	FBgn0034198
D7	2R	20389694	C	T	C>T	0.4	0.8	varscan2,somaticsniper	intergenic_region	intergenic	intergenic	intergenic
D7	2R	20511246	T	G	T>G	0.185	0.37	somaticsniper,strelka	upstream_gene_variant	exon_1	CR44648	FBgn0265859
D7	2R	21389839	G	T	C>A	0.161	0.322	varscan2,somaticsniper	upstream_gene_variant	intron	Acox57D-d	FBgn0034629
D7	2R	21504345	A	C	T>G	0.364	0.728	somaticsniper,strelka	upstream_gene_variant	intron	MESK2	FBgn0043070
D7	3L	987529	C	G	C>G	0.184	0.368	varscan2,somaticsniper	downstream_gene_variant	intron	Glut1	FBgn0264574
D7	3L	3286827	C	A	C>A	0.32	0.64	somaticsniper,strelka	upstream_gene_variant	intron	CG12017	FBgn0035429
D7	3L	3520669	A	T	T>A	0.145	0.29	somaticsniper,strelka	downstream_gene_variant	intron	Eip63E	FBgn0005640
D7	3L	4680287	T	C	T>C	0.257	0.514	freebayes	downstream_gene_variant	intron	axo	FBgn0262870
D7	3L	11923834	G	A	C>T	0	0	somaticsniper,strelka	synonymous_variant	exon	SdhAL	FBgn0036222
D7	3L	11923843	A	G	T>C	0	0	somaticsniper,strelka	synonymous_variant	exon	SdhAL	FBgn0036222
D7	3L	11923846	A	G	T>C	0	0	somaticsniper,strelka	synonymous_variant	exon	SdhAL	FBgn0036222
D7	3L	12182454	G	A	C>T	0.359	0.718	varscan2,somaticsniper	upstream_gene_variant	intron	CAH2	FBgn0027843
D7	3L	12237065	A	G	T>C	0.171	0.342	mutect2,strelka	intron_variant	intron	app	FBgn0260941
D7	3L	18364784	T	C	T>C	0.217	0.434	somaticsniper,strelka	intergenic_region	intergenic	intergenic	intergenic
D7	3L	23754657	T	C	T>C	0	0	somaticsniper,strelka	intergenic_region	intergenic	intergenic	intergenic
D7	3L	24866259	T	C	T>C	0.194	0.388	somaticsniper,strelka	intergenic_region	intergenic	intergenic	intergenic
D7	3L	24866277	C	T	C>T	0.194	0.388	somaticsniper,strelka	intergenic_region	intergenic	intergenic	intergenic
D7	3L	25840342	A	T	T>A	0	0	somaticsniper,strelka	upstream_gene_variant	intron	CG40178	FBgn0058178
D7	3L	25840358	A	T	T>A	0	0	somaticsniper,strelka	upstream_gene_variant	intron	CG40178	FBgn0058178
D7	3R	2090452	A	T	T>A	0.277	0.554	somaticsniper,strelka	intron_variant	intron	Myo81F	FBgn0267431
D7	3R	2090506	A	T	T>A	0.283	0.566	somaticsniper,strelka	intron_variant	intron	Myo81F	FBgn0267431
D7	3R	2090539	A	C	T>G	0.277	0.554	somaticsniper,strelka	intron_variant	intron	Myo81F	FBgn0267431
D7	3R	5993328	G	T	C>A	0.0233	0.0466	somaticsniper,strelka	downstream_gene_variant	intergenic	intergenic	intergenic
D7	3R	6293213	T	G	T>G	0.174	0.348	varscan2,somaticsniper	3_prime_UTR_variant	3UTR	Osi13	FBgn0037422
D7	3R	6293214	C	T	C>T	0.17	0.34	varscan2,somaticsniper	3_prime_UTR_variant	3UTR	Osi13	FBgn0037422
D7	3R	10143424	C	G	C>G	0.167	0.334	varscan2,somaticsniper,strelka	5_prime_UTR_variant	3UTR	CG42759	FBgn0261817
D7	3R	15709573	T	C	T>C	0.182	0.364	somaticsniper,strelka	downstream_gene_variant	intergenic	intergenic	intergenic
D7	3R	16713444	A	T	T>A	0.35	0.7	somaticsniper,strelka,freebayes	intron_variant	intron	Ubx	FBgn0003944
D7	3R	16713461	A	G	T>C	0.304	0.608	somaticsniper,strelka	intron_variant	intron	Ubx	FBgn0003944
D7	3R	28892489	C	G	C>G	0.263	0.526	varscan2,somaticsniper	upstream_gene_variant	intron	Doa	FBgn0265998
D7	3R	29802108	C	T	C>T	0	0	somaticsniper,strelka	synonymous_variant	exon	CG7834	FBgn0039697
D7	3R	30276464	C	T	C>T	0.256	0.512	somaticsniper,strelka	upstream_gene_variant	intergenic	intergenic	intergenic
D7	3R	32061897	T	C	T>C	0.257	0.514	freebayes	intron_variant	intron	Map205	FBgn0002645
D7	X	4841694	T	A	T>A	0.176	0.176	mutect2,strelka	intron_variant	intron	CG42594	FBgn0260971
D7	X	5090656	G	A	C>T	0.25	0.25	somaticsniper,strelka	intron_variant	intron	rg	FBgn0266098
D7	X	6346906	C	T	C>T	0.154	0.154	mutect2,strelka	upstream_gene_variant	intergenic	intergenic	intergenic
D7	X	7390665	A	G	T>C	0	0	somaticsniper,strelka	intron_variant	intron	CG1677	FBgn0029941
D7	X	8250893	G	A	C>T	0	0	somaticsniper,strelka	synonymous_variant	exon_3	ND-75	FBgn0017566
D7	X	8250896	G	A	C>T	0	0	somaticsniper,strelka	synonymous_variant	exon_3	ND-75	FBgn0017566
D7	X	9905666	A	G	T>C	0.138	0.138	somaticsniper,strelka	downstream_gene_variant	intergenic	intergenic	intergenic
D7	X	10027587	A	G	T>C	0.257	0.257	freebayes	intron_variant	intron	Cht6	FBgn0263132
D7	X	10262142	G	C	C>G	0.194	0.194	somaticsniper,strelka	upstream_gene_variant	intron	Hk	FBgn0263220
D7	X	10262152	C	G	C>G	0.217	0.217	somaticsniper,strelka	upstream_gene_variant	intron	Hk	FBgn0263220
D7	X	12589325	T	G	T>G	0.182	0.182	somaticsniper,strelka	splice_region_variant&intron_variant	5UTR	LIMK1	FBgn0283712
D7	X	15916326	A	C	T>G	0.344	0.344	somaticsniper,strelka	intron_variant	intron	CG8909	FBgn0030706
D7	X	16236040	C	A	C>A	0.163	0.163	somaticsniper,strelka	intergenic_region	intergenic	intergenic	intergenic
D7	X	19608965	A	G	T>C	0.257	0.257	freebayes	upstream_gene_variant	intron	CG14207	FBgn0031037
D7	X	20861860	G	A	C>T	0.189	0.189	somaticsniper,strelka	upstream_gene_variant	intron	shakB	FBgn0085387
D7	X	22510178	A	G	T>C	0.231	0.231	somaticsniper,strelka	downstream_gene_variant	intergenic	intergenic	intergenic
D7	Y	498215	T	A	T>A	0	0	somaticsniper,strelka	intron_variant	intron	kl-3	FBgn0267432
D7	Y	2908679	G	C	C>G	0.294	0.294	somaticsniper,strelka	intergenic_region	intergenic	intergenic	intergenic
D7	Y	3246106	G	A	C>T	0	0	somaticsniper,strelka	intergenic_region	intergenic	intergenic	intergenic
D7	Y	3246145	T	C	T>C	0	0	somaticsniper,strelka	intergenic_region	intergenic	intergenic	intergenic
D7	Y	3520114	C	T	C>T	0.262	0.262	somaticsniper,strelka	intergenic_region	intergenic	intergenic	intergenic
P1	2L	4938441	T	G	T>G	0.333	0.666	somaticsniper,strelka	synonymous_variant	exon	Sgs1	FBgn0003372
P1	2L	10441810	C	T	C>T	0.25	0.5	somaticsniper,strelka	upstream_gene_variant	intergenic	intergenic	intergenic
P1	2L	10441811	A	C	T>G	0.25	0.5	somaticsniper,strelka	upstream_gene_variant	intergenic	intergenic	intergenic
P1	2L	10708954	G	A	C>T	0.143	0.286	mutect2,varscan2	5_prime_UTR_variant	exon_1	Lip2	FBgn0024740
P1	2L	16365499	T	G	T>G	0.375	0.75	somaticsniper,strelka	upstream_gene_variant	intergenic	intergenic	intergenic
P1	2L	16672134	G	A	C>T	0.25	0.5	mutect2,somaticsniper,strelka	intron_variant	intron	Trpgamma	FBgn0032593
P1	2L	18416468	G	A	C>T	0.308	0.616	somaticsniper,strelka	intergenic_region	intergenic	intergenic	intergenic
P1	2L	18773932	G	A	C>T	0.2	0.4	mutect2,varscan2	upstream_gene_variant	intron	ham	FBgn0045852
P1	2L	23328801	C	T	C>T	0.231	0.462	somaticsniper,strelka	upstream_gene_variant	intergenic	intergenic	intergenic
P1	2R	1951544	A	G	T>C	0.286	0.572	somaticsniper,strelka	intron_variant	intron	CG17684	FBgn0263780
P1	2R	2886643	T	G	T>G	0.267	0.534	somaticsniper,strelka	intergenic_region	intergenic	intergenic	intergenic
P1	2R	2886644	C	T	C>T	0.267	0.534	somaticsniper,strelka	intergenic_region	intergenic	intergenic	intergenic
P1	2R	3142103	G	A	C>T	0.364	0.728	somaticsniper,strelka	intron_variant	intron	dpr21	FBgn0260995
P1	2R	4362105	G	C	C>G	0.429	0.858	somaticsniper,strelka	intron_variant	intron	Gprk1	FBgn0260798
P1	2R	6757518	C	T	C>T	0.2	0.4	mutect2,strelka	upstream_gene_variant	intergenic	intergenic	intergenic
P1	2R	10292254	G	A	C>T	1	1	somaticsniper,strelka	intron_variant	intron	CAP	FBgn0033504
P1	2R	11489765	G	C	C>G	0.357	0.714	somaticsniper,strelka	intron_variant	intron	inv	FBgn0001269
P1	2R	15270720	G	A	C>T	0.273	0.546	mutect2,varscan2,somaticsniper,strelka	missense_variant	exon_22	Trpm	FBgn0265194
P1	2R	19727148	C	T	C>T	0.231	0.462	varscan2,strelka	upstream_gene_variant	exon_1	snoRNA:185	FBgn0065076
P1	2R	20949663	G	A	C>T	0.167	0.334	mutect2,varscan2	upstream_gene_variant	intergenic	intergenic	intergenic
P1	2R	21849183	G	A	C>T	0.3	0.6	mutect2,varscan2,somaticsniper,strelka	upstream_gene_variant	intergenic	intergenic	intergenic
P1	2R	22747475	C	T	C>T	0.25	0.5	mutect2,somaticsniper	synonymous_variant	exon_6	CG42260	FBgn0259145
P1	2R	23318709	G	A	C>T	0.273	0.546	mutect2,somaticsniper,strelka	synonymous_variant	exon	CG30412	FBgn0050412
P1	2R	23851154	T	G	T>G	0.273	0.546	mutect2,varscan2,somaticsniper,strelka	upstream_gene_variant	exon_1	CR45928	FBgn0267590
P1	3L	1301550	C	A	C>A	0.375	0.75	mutect2,somaticsniper	3_prime_UTR_variant	3UTR	Rac1	FBgn0010333
P1	3L	2338521	A	T	T>A	0.25	0.5	mutect2,somaticsniper,strelka	intron_variant	intron	MsR1	FBgn0035331
P1	3L	5401760	G	A	C>T	0.417	0.834	somaticsniper,strelka	intergenic_region	intergenic	intergenic	intergenic
P1	3L	7563402	A	C	T>G	0.571	1	somaticsniper,strelka	upstream_gene_variant	intron	frac	FBgn0035798
P1	3L	7563403	A	C	T>G	0.571	1	somaticsniper,strelka	upstream_gene_variant	intron	frac	FBgn0035798
P1	3L	9070358	T	C	T>C	1	1	somaticsniper,strelka	3_prime_UTR_variant	3UTR	CG4911	FBgn0035959
P1	3L	12183153	A	C	T>G	0.385	0.77	varscan2,somaticsniper	3_prime_UTR_variant	3UTR	CAH2	FBgn0027843
P1	3L	14062908	T	A	T>A	0.308	0.616	varscan2,somaticsniper	intron_variant	intron	Frl	FBgn0267795
P1	3L	14932223	A	G	T>C	0.273	0.546	mutect2,somaticsniper,strelka	intron_variant	intron	DCX-EMAP	FBgn0259099
P1	3L	22097091	T	C	T>C	0.5	1	somaticsniper,strelka	intergenic_region	intergenic	intergenic	intergenic
P1	3L	23938586	C	T	C>T	0.556	1	somaticsniper,strelka	intron_variant	intron	CG40470	FBgn0058470
P1	3R	2452	C	T	C>T	0.444	0.888	somaticsniper,strelka	intergenic_region	intergenic	intergenic	intergenic
P1	3R	7184724	C	T	C>T	0.381	0.762	varscan2,somaticsniper	missense_variant	exon	CG10055	FBgn0037482
P1	3R	8739162	A	C	T>G	0.235	0.47	somaticsniper,strelka	downstream_gene_variant	intron	CG9801	FBgn0037623
P1	3R	9908513	C	T	C>T	0.211	0.422	varscan2,somaticsniper	intron_variant	intron	Glut4EF	FBgn0267336
P1	3R	13098939	A	G	T>C	0.273	0.546	mutect2,strelka	missense_variant	exon_6	timeout	FBgn0038118
P1	3R	15924972	C	T	C>T	0.429	0.858	somaticsniper,strelka	upstream_gene_variant	intron	Fbxl7	FBgn0038385
P1	3R	17229481	A	T	T>A	0.333	0.666	somaticsniper,strelka	downstream_gene_variant	intergenic	intergenic	intergenic
P1	3R	18090435	T	C	T>C	0.385	0.77	varscan2,somaticsniper	upstream_gene_variant	intergenic	intergenic	intergenic
P1	3R	18371610	A	C	T>G	0.357	0.714	varscan2,somaticsniper	upstream_gene_variant	intron	gl	FBgn0004618
P1	3R	19405835	C	T	C>T	0.182	0.364	mutect2,varscan2	stop_gained	exon	CG5316	FBgn0038704
P1	3R	20279147	A	T	T>A	0.182	0.364	somaticsniper,strelka	intron_variant	intron	cic	FBgn0262582
P1	3R	21523590	C	T	C>T	0.444	0.888	mutect2,somaticsniper,strelka,freebayes	synonymous_variant	exon_4	CG7956	FBgn0038890
P1	3R	22201757	C	T	C>T	0.273	0.546	mutect2,varscan2,somaticsniper,strelka	intron_variant	ncRNA	CR45224	FBgn0266751
P1	3R	31681844	T	C	T>C	1	1	somaticsniper,strelka	upstream_gene_variant	intergenic	intergenic	intergenic
P1	4	631279	T	G	T>G	0.231	0.462	mutect2,varscan2,strelka	downstream_gene_variant	intron	Gat	FBgn0039915
P1	X	1801952	C	T	C>T	1	1	somaticsniper,strelka	intron_variant	intron	CG42666	FBgn0261548
P1	X	5879109	C	T	C>T	1	1	somaticsniper,strelka	missense_variant	exon_2	Usp30	FBgn0029819
P1	X	12124437	G	A	C>T	0.259	0.259	somaticsniper,strelka	upstream_gene_variant	intron	Ten-a	FBgn0267001
P1	X	12124473	T	C	T>C	0.269	0.269	somaticsniper,strelka	upstream_gene_variant	intron	Ten-a	FBgn0267001
P1	X	12124474	T	G	T>G	0.269	0.269	somaticsniper,strelka	upstream_gene_variant	intron	Ten-a	FBgn0267001
P1	X	14301299	A	T	T>A	1	1	somaticsniper,strelka,freebayes	intergenic_region	intergenic	intergenic	intergenic
P3	2L	2722009	T	C	T>C	0.241	0.482	mutect2,somaticsniper	upstream_gene_variant	intergenic	intergenic	intergenic
P3	2L	2742827	T	C	T>C	0.364	0.728	somaticsniper,strelka	synonymous_variant	exon	Hrs	FBgn0031450
P3	2L	2742860	A	T	T>A	0.304	0.608	somaticsniper,strelka	synonymous_variant	exon	Hrs	FBgn0031450
P3	2L	3058354	A	G	T>C	0.25	0.5	mutect2,somaticsniper,strelka	downstream_gene_variant	intron	FASN1	FBgn0283427
P3	2L	4949701	G	T	C>A	0.267	0.534	mutect2,somaticsniper	5_prime_UTR_variant	5UTR	jet	FBgn0031652
P3	2L	4949703	A	G	T>C	0.267	0.534	mutect2,somaticsniper	5_prime_UTR_variant	5UTR	jet	FBgn0031652
P3	2L	5405274	A	C	T>G	0.357	0.714	somaticsniper,strelka	intron_variant	intron	H15	FBgn0016660
P3	2L	6555729	A	G	T>C	0.25	0.5	somaticsniper,strelka	3_prime_UTR_variant	3UTR	IFT52	FBgn0031829
P3	2L	7458149	C	T	C>T	0.2	0.4	mutect2,strelka	synonymous_variant	exon_1	Gr28b	FBgn0045495
P3	2L	9529275	A	G	T>C	0.35	0.7	somaticsniper,strelka	missense_variant	exon	CG31883	FBgn0032122
P3	2L	11791415	T	G	T>G	0.419	0.838	somaticsniper,strelka	downstream_gene_variant	intron	Tsp33B	FBgn0032376
P3	2L	12750790	T	G	T>G	0.263	0.526	somaticsniper,strelka	intergenic_region	intron	MRP	FBgn0032456
P3	2L	12768389	C	A	C>A	0.174	0.348	somaticsniper,strelka	intergenic_region	ncRNA	CR46206	FBgn0267925
P3	2L	14404362	A	C	T>G	0.241	0.482	somaticsniper,strelka	intron_variant	intron	elB	FBgn0004858
P3	2L	14968841	G	T	C>A	0.472	0.944	somaticsniper,strelka	intron_variant	intron	CG42313	FBgn0259213
P3	2L	15069023	C	A	C>A	0.406	0.812	somaticsniper,strelka	upstream_gene_variant	intron	vig	FBgn0024183
P3	2L	18844679	A	T	T>A	0.3	0.6	somaticsniper,strelka	upstream_gene_variant	intergenic	intergenic	intergenic
P3	2L	19517373	A	T	T>A	0.375	0.75	somaticsniper,strelka	upstream_gene_variant	intergenic	intergenic	intergenic
P3	2L	19606004	G	C	C>G	0.586	1	somaticsniper,strelka	upstream_gene_variant	intron	Lar	FBgn0000464
P3	2L	19628838	T	C	T>C	0.533	1	somaticsniper,strelka	intron_variant	intron	CG46244	FBgn0267964
P3	2L	21622298	A	G	T>C	0.208	0.416	somaticsniper,strelka	upstream_gene_variant	intron	CG2201	FBgn0032955
P3	2L	21681173	G	T	C>A	0.364	0.728	somaticsniper,strelka	synonymous_variant	exon_3	EF2	FBgn0000559
P3	2L	21681176	C	A	C>A	0.364	0.728	somaticsniper,strelka	synonymous_variant	exon_3	EF2	FBgn0000559
P3	2R	4240412	C	T	C>T	0.242	0.484	somaticsniper,strelka	intron_variant	intron	IntS3	FBgn0262117
P3	2R	4240432	C	A	C>A	0.351	0.702	somaticsniper,strelka	intron_variant	intron	IntS3	FBgn0262117
P3	2R	6200750	A	T	T>A	0.25	0.5	somaticsniper,strelka	upstream_gene_variant	intergenic	intergenic	intergenic
P3	2R	7881013	T	C	T>C	0.222	0.444	varscan2,somaticsniper	intron_variant	intron	Dgk	FBgn0085390
P3	2R	8480973	A	C	T>G	0.344	0.688	somaticsniper,strelka	intron_variant	intron	mtt	FBgn0050361
P3	2R	8891194	T	G	T>G	0.19	0.38	somaticsniper,strelka	upstream_gene_variant	intron	CG8272	FBgn0033337
P3	2R	9214087	G	A	C>T	0.4	0.8	somaticsniper,strelka	upstream_gene_variant	intergenic	intergenic	intergenic
P3	2R	9214088	C	A	C>A	0.4	0.8	somaticsniper,strelka	upstream_gene_variant	intergenic	intergenic	intergenic
P3	2R	9632091	C	T	C>T	0.19	0.38	somaticsniper,strelka	downstream_gene_variant	intron	Mmp2	FBgn0033438
P3	2R	9721989	A	G	T>C	0.444	0.888	somaticsniper,strelka	intron_variant	intron	sqa	FBgn0259678
P3	2R	10098597	A	C	T>G	0.462	0.924	somaticsniper,strelka	missense_variant	exon	RpLP0-like	FBgn0033485
P3	2R	10565295	T	G	T>G	0.2	0.4	somaticsniper,strelka	upstream_gene_variant	intron	psq	FBgn0263102
P3	2R	11841463	T	G	T>G	0.464	0.928	somaticsniper,strelka	upstream_gene_variant	intergenic	intergenic	intergenic
P3	2R	12511024	G	C	C>G	0.269	0.538	somaticsniper,strelka	upstream_gene_variant	intergenic	intergenic	intergenic
P3	2R	12511044	G	T	C>A	0.526	1	somaticsniper,strelka	upstream_gene_variant	intergenic	intergenic	intergenic
P3	2R	13455864	C	T	C>T	0.273	0.546	mutect2,somaticsniper,strelka	missense_variant	exon_6	arr	FBgn0000119
P3	2R	15106703	C	T	C>T	0.2	0.4	mutect2,strelka	intergenic_region	intergenic	intergenic	intergenic
P3	2R	15763278	A	C	T>G	0.522	1	somaticsniper,strelka	splice_region_variant&intron_variant	intron	Zasp52	FBgn0265991
P3	2R	15881302	C	T	C>T	0.444	0.888	somaticsniper,strelka	intron_variant	intron	sli	FBgn0264089
P3	2R	18158285	G	C	C>G	0.367	0.734	somaticsniper,strelka	5_prime_UTR_variant	5UTR	CG10914	FBgn0034307
P3	2R	19137129	G	T	C>A	0.6	1	somaticsniper,strelka	5_prime_UTR_variant	exon_1	CG15118	FBgn0034418
P3	2R	21028370	A	T	T>A	0.278	0.556	somaticsniper,strelka	downstream_gene_variant	intergenic	intergenic	intergenic
P3	2R	21396324	T	A	T>A	0.235	0.47	somaticsniper,strelka	downstream_gene_variant	intron	Sdc	FBgn0010415
P3	2R	22681594	A	T	T>A	0.195	0.39	somaticsniper,strelka	downstream_gene_variant	intergenic	intergenic	intergenic
P3	2R	22937212	T	G	T>G	0.681	1	somaticsniper,strelka	upstream_gene_variant	intergenic	intergenic	intergenic
P3	2R	22937232	G	C	C>G	0.259	0.518	somaticsniper,strelka	upstream_gene_variant	intergenic	intergenic	intergenic
P3	3L	4493005	A	G	T>C	0.872	1	somaticsniper,strelka	upstream_gene_variant	intergenic	intergenic	intergenic
P3	3L	5415051	T	A	T>A	0.211	0.422	somaticsniper,strelka	intergenic_region	intergenic	intergenic	intergenic
P3	3L	5415053	A	G	T>C	0.304	0.608	somaticsniper,strelka	intergenic_region	intergenic	intergenic	intergenic
P3	3L	5758528	C	A	C>A	0.389	0.778	mutect2,varscan2,somaticsniper,strelka	stop_gained	exon_4	Usp47	FBgn0016756
P3	3L	7202752	T	A	T>A	0.406	0.812	somaticsniper,strelka	intergenic_region	intergenic	intergenic	intergenic
P3	3L	11498324	C	A	C>A	0.25	0.5	somaticsniper,strelka	3_prime_UTR_variant	3UTR	chrb	FBgn0036165
P3	3L	12220794	A	G	T>C	0.375	0.75	somaticsniper,strelka	5_prime_UTR_variant	5UTR	app	FBgn0260941
P3	3L	14384473	T	G	T>G	0.605	1	somaticsniper,strelka	downstream_gene_variant	intergenic	intergenic	intergenic
P3	3L	14933852	G	C	C>G	0.536	1	somaticsniper,strelka	intron_variant	intron	DCX-EMAP	FBgn0259099
P3	3L	18278881	A	T	T>A	0.25	0.5	somaticsniper,strelka	intergenic_region	intergenic	intergenic	intergenic
P3	3L	25152330	G	C	C>G	0.435	0.87	somaticsniper,strelka	intergenic_region	intergenic	intergenic	intergenic
P3	3L	25499848	G	A	C>T	0.333	0.666	mutect2,somaticsniper,strelka	intron_variant	intron	CG45782	FBgn0267429
P3	3L	26374446	T	G	T>G	0.345	0.69	somaticsniper,strelka	upstream_gene_variant	intergenic	intergenic	intergenic
P3	3L	27294444	G	A	C>T	0.476	0.952	somaticsniper,strelka	intron_variant	intron	Dbp80	FBgn0024804
P3	3R	5835924	G	A	C>T	0.174	0.348	somaticsniper,strelka	missense_variant	exon_2	CR45192	FBgn0266702
P3	3R	5835929	T	A	T>A	0.182	0.364	somaticsniper,strelka	missense_variant	exon_2	CR45192	FBgn0266702
P3	3R	6009541	T	A	T>A	0.293	0.586	somaticsniper,strelka	upstream_gene_variant	intergenic	intergenic	intergenic
P3	3R	7038369	C	T	C>T	0.568	1	somaticsniper,strelka	intron_variant	ncRNA	CR44933	FBgn0266238
P3	3R	7191963	T	A	T>A	0.304	0.608	somaticsniper,strelka	intron_variant	intron	lap	FBgn0086372
P3	3R	7209740	A	C	T>G	0.429	0.858	somaticsniper,strelka	upstream_gene_variant	intergenic	intergenic	intergenic
P3	3R	7209768	T	A	T>A	0.581	1	somaticsniper,strelka	upstream_gene_variant	intergenic	intergenic	intergenic
P3	3R	7209769	A	T	T>A	0.571	1	somaticsniper,strelka	upstream_gene_variant	intergenic	intergenic	intergenic
P3	3R	7209777	G	A	C>T	0.31	0.62	somaticsniper,strelka	upstream_gene_variant	intergenic	intergenic	intergenic
P3	3R	8746825	C	T	C>T	0.214	0.428	mutect2,strelka	upstream_gene_variant	intron	CG9801	FBgn0037623
P3	3R	9721065	T	A	T>A	0.364	0.728	somaticsniper,strelka	missense_variant	exon_7	hyd	FBgn0002431
P3	3R	15069046	G	C	C>G	0.28	0.56	somaticsniper,strelka	intron_variant	intron	dpr9	FBgn0038282
P3	3R	15425239	A	G	T>C	0.469	0.938	somaticsniper,strelka	missense_variant	exon_2	CG6118	FBgn0038339
P3	3R	19543622	T	C	T>C	0.182	0.364	somaticsniper,strelka	intron_variant	intron	Dys	FBgn0260003
P3	3R	19742565	G	T	C>A	0.321	0.642	somaticsniper,strelka	downstream_gene_variant	intron	GluClalpha	FBgn0024963
P3	3R	21044782	A	T	T>A	0.596	1	somaticsniper,strelka	stop_lost	stop_codon	CG12278	FBgn0038847
P3	3R	21920491	T	A	T>A	0.222	0.444	somaticsniper,strelka	downstream_gene_variant	intergenic	intergenic	intergenic
P3	3R	23290161	G	A	C>T	0.357	0.714	somaticsniper,strelka	5_prime_UTR_variant	5UTR	CG4434	FBgn0039071
P3	3R	24226639	C	G	C>G	0.292	0.584	somaticsniper,strelka	missense_variant	exon	Spps	FBgn0039169
P3	3R	24420318	T	A	T>A	0.379	0.758	somaticsniper,strelka	intron_variant	intron	nAChRalpha1	FBgn0000036
P3	3R	25154287	C	A	C>A	0.308	0.616	somaticsniper,strelka	intergenic_region	intergenic	intergenic	intergenic
P3	3R	27997135	G	A	C>T	0.211	0.422	somaticsniper,strelka	downstream_gene_variant	intergenic	intergenic	intergenic
P3	3R	28089839	A	T	T>A	0.2	0.4	somaticsniper,strelka	3_prime_UTR_variant	3UTR	CG34362	FBgn0085391
P3	3R	28089840	T	A	T>A	0.2	0.4	somaticsniper,strelka	3_prime_UTR_variant	3UTR	CG34362	FBgn0085391
P3	3R	28581149	G	A	C>T	0.394	0.788	somaticsniper,strelka	3_prime_UTR_variant	3UTR	fkh	FBgn0000659
P3	4	196645	A	C	T>G	0.2	0.4	somaticsniper,strelka	upstream_gene_variant	intergenic	intergenic	intergenic
P3	X	3749924	G	A	C>T	0.64	0.64	somaticsniper,strelka	intron_variant	intron	Tlk	FBgn0283657
P3	X	16950438	G	A	C>T	0.667	0.667	somaticsniper,strelka	upstream_gene_variant	intron	RhoGAP15B	FBgn0030808
P5	2L	960850	G	A	C>T	0.261	0.522	varscan2,somaticsniper	downstream_gene_variant	intergenic	intergenic	intergenic
P5	2L	3350467	C	T	C>T	0.391	0.782	mutect2,somaticsniper,strelka	intron_variant	intron	E23	FBgn0020445
P5	2L	4100599	C	T	C>T	0.353	0.706	somaticsniper,strelka	intron_variant	intron	ed	FBgn0000547
P5	2L	7016149	G	A	C>T	0.2	0.4	mutect2,somaticsniper,strelka	missense_variant	exon	ade3	FBgn0000053
P5	2L	9522647	A	G	T>C	0.333	0.666	somaticsniper,strelka	downstream_gene_variant	intron	Oatp30B	FBgn0032123
P5	2L	10457222	G	A	C>T	0.259	0.518	somaticsniper,strelka	5_prime_UTR_variant	exon_1	LManI	FBgn0032253
P5	2L	10457223	G	A	C>T	0.259	0.518	varscan2,somaticsniper,strelka	5_prime_UTR_variant	exon_1	LManI	FBgn0032253
P5	2L	11814111	T	A	T>A	0.174	0.348	varscan2,somaticsniper,strelka	upstream_gene_variant	intergenic	intergenic	intergenic
P5	2L	12636040	T	C	T>C	0.435	0.87	mutect2,somaticsniper,strelka,freebayes	intron_variant	intron	Ref2	FBgn0032439
P5	2L	14627328	C	T	C>T	0.267	0.534	somaticsniper,strelka	intron_variant	intron	osp	FBgn0003016
P5	2L	14627329	A	G	T>C	0.267	0.534	somaticsniper,strelka	intron_variant	intron	osp	FBgn0003016
P5	2L	14627331	G	A	C>T	0.267	0.534	somaticsniper,strelka	intron_variant	intron	osp	FBgn0003016
P5	2L	15212232	T	A	T>A	0.182	0.364	mutect2,strelka	upstream_gene_variant	intergenic	intergenic	intergenic
P5	2L	19801986	C	G	C>G	0.227	0.454	varscan2,somaticsniper	intron_variant	intron	sick	FBgn0263873
P5	2L	20128995	T	A	T>A	0.235	0.47	somaticsniper,strelka	downstream_gene_variant	intergenic	intergenic	intergenic
P5	2L	21556159	T	G	T>G	0.261	0.522	somaticsniper,strelka	intergenic_region	intergenic	intergenic	intergenic
P5	2L	22403016	G	C	C>G	0.162	0.324	somaticsniper,strelka	intergenic_region	intergenic	intergenic	intergenic
P5	2L	23053684	A	G	T>C	0.367	0.734	somaticsniper,strelka	intergenic_region	intergenic	intergenic	intergenic
P5	2L	23053707	C	A	C>A	0.423	0.846	somaticsniper,strelka	intergenic_region	intergenic	intergenic	intergenic
P5	2L	23053732	G	T	C>A	0.407	0.814	somaticsniper,strelka	intergenic_region	intergenic	intergenic	intergenic
P5	2R	431341	G	A	C>T	0.2	0.4	somaticsniper,strelka	upstream_gene_variant	intron	CG45781	FBgn0267428
P5	2R	431403	C	T	C>T	0.185	0.37	somaticsniper,strelka	upstream_gene_variant	intron	CG45781	FBgn0267428
P5	2R	431406	G	T	C>A	0.179	0.358	somaticsniper,strelka	upstream_gene_variant	intron	CG45781	FBgn0267428
P5	2R	1375692	T	C	T>C	0.227	0.454	somaticsniper,strelka	upstream_gene_variant	intron	l(2)41Ab	FBgn0262123
P5	2R	2589358	G	A	C>T	0.185	0.37	somaticsniper,strelka	intergenic_region	intergenic	intergenic	intergenic
P5	2R	2893463	G	A	C>T	0.632	1	somaticsniper,strelka	intergenic_region	intergenic	intergenic	intergenic
P5	2R	4829409	G	A	C>T	0.1	0.2	mutect2,strelka	missense_variant	exon_1	CG14464	FBgn0033000
P5	2R	8495445	C	T	C>T	0.136	0.272	mutect2,strelka	upstream_gene_variant	intron	mtt	FBgn0050361
P5	2R	8495450	G	T	C>A	0.13	0.26	mutect2,strelka	upstream_gene_variant	intron	mtt	FBgn0050361
P5	2R	10573152	C	A	C>A	0.172	0.344	mutect2,somaticsniper,strelka	intron_variant	intron	psq	FBgn0263102
P5	2R	10754348	T	C	T>C	0.192	0.384	somaticsniper,strelka	intron_variant	intron	CG33144	FBgn0053144
P5	2R	13073515	G	A	C>T	0.261	0.522	somaticsniper,strelka	intron_variant	intron	Drl-2	FBgn0033791
P5	2R	15642463	A	T	T>A	0.174	0.348	varscan2,somaticsniper	intron_variant	intron	CG42524	FBgn0260429
P5	2R	16690793	G	T	C>A	0.294	0.588	freebayes	upstream_gene_variant	intron	CG30463	FBgn0050463
P5	2R	17413256	C	T	C>T	0.2	0.4	mutect2,strelka	synonymous_variant	exon	Prosalpha5	FBgn0016697
P5	2R	17587754	C	T	C>T	0.333	0.666	mutect2,somaticsniper,strelka,freebayes	missense_variant	exon_5	RhoGAP54D	FBgn0034249
P5	2R	19834931	A	C	T>G	0.174	0.348	somaticsniper,strelka	downstream_gene_variant	intergenic	intergenic	intergenic
P5	2R	24547737	G	A	C>T	0.353	0.706	varscan2,somaticsniper	intron_variant	intron	ITP	FBgn0035023
P5	3L	729950	G	T	C>A	0.3	0.6	somaticsniper,strelka	intergenic_region	intergenic	intergenic	intergenic
P5	3L	2866151	G	T	C>A	0.175	0.35	mutect2,varscan2,somaticsniper,strelka	intron_variant	intron	Tet	FBgn0263392
P5	3L	3451285	A	G	T>C	0.22	0.44	mutect2,strelka	intron_variant	intron	eIF5B	FBgn0026259
P5	3L	5315094	C	G	C>G	0.211	0.422	somaticsniper,strelka	downstream_gene_variant	intergenic	intergenic	intergenic
P5	3L	5521148	G	A	C>T	0.222	0.444	somaticsniper,strelka	intron_variant	intron	Lkr	FBgn0035610
P5	3L	5521150	T	A	T>A	0.222	0.444	somaticsniper,strelka	intron_variant	intron	Lkr	FBgn0035610
P5	3L	8028241	A	T	T>A	0.222	0.444	mutect2,strelka	downstream_gene_variant	intron	nmo	FBgn0011817
P5	3L	9649487	C	A	C>A	0.156	0.312	mutect2,somaticsniper,strelka	intron_variant	intron	CNMaR	FBgn0053696
P5	3L	11683331	T	A	T>A	0.267	0.534	mutect2,somaticsniper,strelka,freebayes	synonymous_variant	exon_2	TfIIEalpha	FBgn0015828
P5	3L	12420172	T	C	T>C	0.2	0.4	mutect2,strelka	upstream_gene_variant	intergenic	intergenic	intergenic
P5	3L	17118192	G	A	C>T	0.2	0.4	somaticsniper,strelka	intron_variant	intron	Rbp6	FBgn0260943
P5	3L	20454270	T	C	T>C	0.229	0.458	somaticsniper,strelka	upstream_gene_variant	snoRNA	snoRNA:Me18S-U1356b	FBgn0082948
P5	3L	20454274	A	C	T>G	0.286	0.572	varscan2,strelka	upstream_gene_variant	snoRNA	snoRNA:Me18S-U1356b	FBgn0082948
P5	3L	24536044	A	T	T>A	0.314	0.628	varscan2,somaticsniper,freebayes	upstream_gene_variant	intergenic	intergenic	intergenic
P5	3L	24536068	C	G	C>G	0.303	0.606	varscan2,somaticsniper	upstream_gene_variant	intergenic	intergenic	intergenic
P5	3L	24536089	A	G	T>C	0.276	0.552	somaticsniper,strelka	upstream_gene_variant	intergenic	intergenic	intergenic
P5	3L	24536108	G	A	C>T	0.2	0.4	varscan2,somaticsniper	upstream_gene_variant	intergenic	intergenic	intergenic
P5	3L	27254043	T	A	T>A	0.55	1	somaticsniper,strelka	intergenic_region	intergenic	intergenic	intergenic
P5	3L	27254047	G	A	C>T	0.55	1	somaticsniper,strelka	intergenic_region	intergenic	intergenic	intergenic
P5	3R	5716442	C	T	C>T	0.15	0.3	mutect2,strelka	synonymous_variant	exon_1	cas	FBgn0004878
P5	3R	11661878	A	G	T>C	0.25	0.5	somaticsniper,strelka	intron_variant	intron	CG42327	FBgn0259227
P5	3R	13331731	C	G	C>G	0.6	1	somaticsniper,strelka	intron_variant	intron	PK2-R2	FBgn0038139
P5	3R	18497949	T	G	T>G	0.304	0.608	varscan2,somaticsniper	intron_variant	intron	fru	FBgn0004652
P5	3R	21784595	C	T	C>T	0.194	0.388	mutect2,varscan2,somaticsniper,strelka	3_prime_UTR_variant	exon_1	CRG	FBgn0266181
P5	3R	23445655	A	T	T>A	0.542	1	mutect2,varscan2,somaticsniper,strelka	intron_variant	intron	CG4374	FBgn0039078
P5	3R	24288281	G	C	C>G	0.235	0.47	mutect2,strelka	3_prime_UTR_variant	3UTR	CG6356	FBgn0039178
P5	3R	24484292	A	C	T>G	0.211	0.422	somaticsniper,strelka	upstream_gene_variant	intergenic	intergenic	intergenic
P5	3R	24484293	T	G	T>G	0.222	0.444	somaticsniper,strelka	upstream_gene_variant	intergenic	intergenic	intergenic
P5	3R	26069677	T	A	T>A	0.188	0.376	mutect2,strelka	downstream_gene_variant	intergenic	intergenic	intergenic
P5	3R	27707208	A	T	T>A	0.182	0.364	mutect2,varscan2	5_prime_UTR_variant	5UTR	CG12877	FBgn0039544
P5	3R	30233997	T	C	T>C	0.542	1	somaticsniper,strelka	downstream_gene_variant	intergenic	intergenic	intergenic
P5	3R	30577125	C	A	C>A	0.167	0.334	somaticsniper,strelka	upstream_gene_variant	intron	tmod	FBgn0082582
P5	X	17810196	A	T	T>A	0.375	0.375	somaticsniper,strelka,freebayes	intron_variant	intron	OdsH	FBgn0026058
P5	X	21015879	A	G	T>C	0.167	0.167	mutect2,strelka	intergenic_region	intergenic	intergenic	intergenic
P5	X	22764824	G	A	C>T	1	1	somaticsniper,strelka,freebayes	intron_variant	exon_2	CR44109	FBgn0264940

## Sheet: Indels
Supplemental Table S8			Somatic SNV and Indel calls throughout the genome
sample	chrom	pos	ref	alt	type	allele_freq	cell_fraction	called_by	variant_type	feature	gene	id
P17	2L	179509	TTCTTTGTTTGTCGCATACCTTGGACACACA	T	del:30	0.256	0.512	strelka	upstream_gene_variant	intron	spen	FBgn0016977
P17	2L	1138255	A	AT	ins:1	0.0617	0.1234	strelka	upstream_gene_variant	intron	CG4577	FBgn0031306
P17	2L	1141935	T	TGTAAGTTCTAAACTAA	ins:16	0.306	0.612	strelka	upstream_gene_variant	intergenic	intergenic	intergenic
P17	2L	1384853	TA	T	del:1	0.0563	0.1126	strelka	upstream_gene_variant	intron	robo2	FBgn0002543
P17	2L	1526316	GT	G	del:1	0.082	0.164	strelka	downstream_gene_variant	intergenic	intergenic	intergenic
P17	2L	1562562	A	ACAGCACCGATGGAGCTCAAAACGTTT	ins:26	0.312	0.624	strelka	intron_variant	intron	haf	FBgn0261509
P17	2L	1692707	GTAATA	G	del:5	0.203	0.406	strelka	intron_variant	intron	chinmo	FBgn0086758
P17	2L	1799967	T	TCCA	ins:3	0.103	0.206	strelka	intergenic_region	intergenic	intergenic	intergenic
P17	2L	2498214	AAT	A	del:2	0.122	0.244	mutect2	3_prime_UTR_variant	3UTR	oaf	FBgn0011818
P17	2L	3713223	TA	T	del:1	0.214	0.428	strelka	upstream_gene_variant	intergenic	intergenic	intergenic
P17	2L	4086583	ATG	A	del:2	0.163	0.326	strelka	downstream_gene_variant	intron	ed	FBgn0000547
P17	2L	4234595	AT	A	del:1	0.0494	0.0988	strelka	intergenic_region	intergenic	intergenic	intergenic
P17	2L	7584766	A	ATCC	ins:3	0.0635	0.127	strelka	downstream_gene_variant	intergenic	intergenic	intergenic
P17	2L	7854751	CT	C	del:1	0.167	0.334	strelka	upstream_gene_variant	intron	CG14535	FBgn0031955
P17	2L	8716948	T	TAAGAGAAA	ins:8	0.135	0.27	strelka	upstream_gene_variant	intron	raw	FBgn0003209
P17	2L	8716960	AATTTTGATGATAAAC	A	del:15	0.121	0.242	strelka	upstream_gene_variant	intron	raw	FBgn0003209
P17	2L	9874718	A	ATCTGTGTGCGTGTG	ins:14	0.1	0.2	strelka	intron_variant	intron	nAChRalpha6	FBgn0032151
P17	2L	11044920	GT	G	del:1	0.133	0.266	strelka	intron_variant	intron	Samuel	FBgn0032330
P17	2L	12093244	TATGTACACTATTATATTGTAG	T	del:21	0.098	0.196	strelka	upstream_gene_variant	intron	Pex19	FBgn0032407
P17	2L	12796380	GT	G	del:1	0.1	0.2	strelka	intergenic_region	intergenic	intergenic	intergenic
P17	2L	16717371	TACA	T	del:3	0.0625	0.125	mutect2	upstream_gene_variant	intron	Cyt-c-d	FBgn0086907
P17	2L	18914034	AC	A	del:1	0.397	0.794	strelka	downstream_gene_variant	intergenic	intergenic	intergenic
P17	2L	21827319	A	AG	ins:1	0.2	0.4	strelka	upstream_gene_variant	intergenic	intergenic	intergenic
P17	2L	23369551	T	TTA	ins:2	0.161	0.322	strelka	intergenic_region	intergenic	intergenic	intergenic
P17	2R	3276491	AG	A	del:1	0.0632	0.1264	strelka	intergenic_region	intergenic	intergenic	intergenic
P17	2R	4823798	T	TTTATGTTTATTATTAAGCCCTG	ins:22	0.259	0.518	strelka	intron_variant	intron	CG17528	FBgn0261387
P17	2R	4863106	AT	A	del:1	0.133	0.266	strelka	intergenic_region	intergenic	intergenic	intergenic
P17	2R	7255628	A	AGTATGT	ins:6	0.121	0.242	strelka	downstream_gene_variant	exon_1	CR45280	FBgn0266818
P17	2R	9981439	CAGAG	C	del:4	0.2	0.4	strelka	upstream_gene_variant	intergenic	intergenic	intergenic
P17	2R	10750718	CTATATAGCGCATATAGCA	C	del:18	0.0741	0.1482	strelka	intron_variant	intron	CG33144	FBgn0053144
P17	2R	11193612	AT	A	del:1	0.391	0.782	mutect2	upstream_gene_variant	intron	shn	FBgn0003396
P17	2R	11208202	G	GTT	ins:2	0.0909	0.1818	strelka	intron_variant	intron	shn	FBgn0003396
P17	2R	16571017	GA	G	del:1	0.0704	0.1408	strelka	5_prime_UTR_variant	5UTR	RpS15	FBgn0034138
P17	2R	18643048	GGCTGATTCGATTCCCATTC	G	del:19	0.191	0.382	strelka	upstream_gene_variant	intron	SP2637	FBgn0034371
P17	2R	20403750	G	GTA	ins:2	0.111	0.222	mutect2	intergenic_region	intergenic	intergenic	intergenic
P17	2R	20478418	CA	C	del:1	0.12	0.24	strelka	3_prime_UTR_variant	3UTR	CG12484	FBgn0086604
P17	2R	20554728	AATGCTCGC	A	del:8	0.354	0.708	strelka	upstream_gene_variant	intergenic	intergenic	intergenic
P17	3L	2150720	AT	A	del:1	0.532	1	strelka	downstream_gene_variant	intron	zormin	FBgn0052311
P17	3L	4718245	G	GA	ins:1	0.0682	0.1364	strelka	intron_variant	intron	RhoGEF64C	FBgn0035574
P17	3L	5418782	TCCCCGATTTC	T	del:10	0.139	0.278	strelka	intergenic_region	intergenic	intergenic	intergenic
P17	3L	6356432	CA	C	del:1	0.317	0.634	strelka	upstream_gene_variant	intergenic	intergenic	intergenic
P17	3L	7206222	GCACC	G	del:4	0.341	0.682	strelka	intergenic_region	intergenic	intergenic	intergenic
P17	3L	7814326	AT	A	del:1	0.0968	0.1936	strelka	3_prime_UTR_variant	3UTR	Pdp1	FBgn0016694
P17	3L	8577188	C	CTGGTTGGATTGTTGGATTA	ins:19	0.171	0.342	strelka	5_prime_UTR_variant	exon_1	CG43078	FBgn0262508
P17	3L	8577191	GTTGCCCA	G	del:7	0.129	0.258	strelka	5_prime_UTR_variant	exon_1	CG43078	FBgn0262508
P17	3L	9523488	ATATG	A	del:4	0.0676	0.1352	mutect2	intron_variant	intron	CG33700	FBgn0053700
P17	3L	9832069	C	CA	ins:1	0.0408	0.0816	strelka	3_prime_UTR_variant	exon_4	CG43897	FBgn0264489
P17	3L	10502093	AAGCATAAAACAAGACACCAAAGAAAAATAAAAACGCAGCGTGC	A	del:43	0.146	0.292	strelka	intron_variant	intron	Rbfox1	FBgn0052062
P17	3L	10726438	GAC	G	del:2	0.098	0.196	strelka	intergenic_region	intergenic	intergenic	intergenic
P17	3L	11242914	CGA	C	del:2	0.11	0.22	strelka	upstream_gene_variant	intergenic	intergenic	intergenic
P17	3L	12726526	TCAGAATC	T	del:7	0.121	0.242	strelka	intergenic_region	intergenic	intergenic	intergenic
P17	3L	13800878	ATG	A	del:2	0.0714	0.1428	strelka	upstream_gene_variant	intron	bru3	FBgn0264001
P17	3L	17680111	C	CATTATAAA	ins:8	0.306	0.612	strelka	intron_variant	intron	CG34251	FBgn0085280
P17	3L	18201943	TC	T	del:1	0.13	0.26	strelka	frameshift_variant	exon	CG7320	FBgn0036782
P17	3L	19206145	C	CT	ins:1	0.0727	0.1454	strelka	intron_variant	intron	fz2	FBgn0016797
P17	3R	1519948	T	TCGTATGC	ins:7	0.204	0.408	strelka	intron_variant	intron	Myo81F	FBgn0267431
P17	3R	2517671	TAGTCCGG	T	del:7	0.073	0.146	strelka	intergenic_region	intron	Myo81F	FBgn0267431
P17	3R	4913068	GT	G	del:1	0.135	0.27	strelka	downstream_gene_variant	intron	Cdep	FBgn0265082
P17	3R	6881266	GCA	G	del:2	0.0645	0.129	strelka	intron_variant	ncRNA	CR44931	FBgn0266236
P17	3R	8272131	G	GTTTGGA	ins:6	0.31	0.62	strelka	upstream_gene_variant	intergenic	intergenic	intergenic
P17	3R	8926854	GA	G	del:1	0.122	0.244	strelka	intron_variant	intron	pyd	FBgn0262614
P17	3R	10631036	CAA	C	del:2	0	0	consensus	intron_variant	intron	hth	FBgn0001235
P17	3R	11877019	CAT	C	del:2	0.143	0.286	strelka	upstream_gene_variant	intergenic	intergenic	intergenic
P17	3R	13014758	AAAAC	A	del:4	0.312	0.624	mutect2	upstream_gene_variant	intron	CtBP	FBgn0020496
P17	3R	16071078	TCAACA	T	del:5	0	0	consensus	frameshift_variant	exon_15	Mhcl	FBgn0026059
P17	3R	16071084	C	CGTGTT	ins:5	0	0	consensus	frameshift_variant	exon_15	Mhcl	FBgn0026059
P17	3R	20982141	G	GA	ins:1	0.0847	0.1694	strelka	upstream_gene_variant	intron	Calx	FBgn0013995
P17	3R	21091636	G	GA	ins:1	0.0822	0.1644	strelka	upstream_gene_variant	ncRNA	CR44178	FBgn0265067
P17	3R	21246207	A	ATATATCT	ins:7	0.358	0.716	strelka	upstream_gene_variant	intergenic	intergenic	intergenic
P17	3R	24456043	C	CAAGTAAATGTGTATATACAAG	ins:21	0.273	0.546	strelka	intron_variant	intron	nAChRalpha1	FBgn0000036
P17	3R	26076861	GT	G	del:1	0.113	0.226	strelka	3_prime_UTR_variant	3UTR	dysf	FBgn0039411
P17	3R	27104433	A	AG	ins:1	0.0645	0.129	strelka	splice_region_variant&intron_variant	intron	caix	FBgn0039486
P17	3R	27742023	AC	A	del:1	0.069	0.138	strelka	upstream_gene_variant	intron	Ets98B	FBgn0005659
P17	3R	29467994	AAGTG	A	del:4	0.143	0.286	mutect2	intron_variant	intron	Ptp99A	FBgn0004369
P17	X	10113891	GCAA	G	del:3	0	0	consensus	downstream_gene_variant	intron	RhoU	FBgn0083940
P17	X	13927685	GCT	G	del:2	0.176	0.176	strelka	intron_variant	intron	mamo	FBgn0267033
P17	X	14369046	GCA	G	del:2	0.152	0.152	strelka	intron_variant	intron	dpr8	FBgn0052600
P17	X	20251806	GCA	G	del:2	0.087	0.087	strelka	upstream_gene_variant	intron	Rab10	FBgn0015789
P17	Y	860065	C	CTGT	ins:3	0.0977	0.0977	strelka	intergenic_region	intergenic	intergenic	intergenic
P17	Y	2112787	CT	C	del:1	0.256	0.256	strelka	intergenic_region	intergenic	intergenic	intergenic
P17	Y	3633377	TTGCCAATAG	T	del:9	0.192	0.192	strelka	intergenic_region	intergenic	intergenic	intergenic
P19	2L	1163861	GCT	G	del:2	0.0638	0.1276	mutect2	5_prime_UTR_variant	exon_1	CG5080	FBgn0031313
P19	2L	1400648	AT	A	del:1	0.0784	0.1568	strelka	intron_variant	intron	robo2	FBgn0002543
P19	2L	3197967	GA	G	del:1	0.143	0.286	strelka	intron_variant	intron	CG34393	FBgn0085422
P19	2L	3273005	AAC	A	del:2	0.235	0.47	strelka	downstream_gene_variant	intergenic	intergenic	intergenic
P19	2L	3273014	TATTATTATTATTTA	T	del:14	0.25	0.5	strelka	downstream_gene_variant	intergenic	intergenic	intergenic
P19	2L	4453458	TCTG	T	del:3	0.108	0.216	strelka	conservative_inframe_deletion	exon	CG15440	FBgn0031607
P19	2L	5359898	AT	A	del:1	0.0536	0.1072	mutect2	frameshift_variant	exon_12	nompC	FBgn0016920
P19	2L	6583442	GA	G	del:1	0	0	consensus	intron_variant	intron	CG11319	FBgn0031835
P19	2L	9652285	C	CG	ins:1	0.0909	0.1818	strelka	frameshift_variant	exon_14	Apoltp	FBgn0032136
P19	2L	12663713	C	CA	ins:1	0.0968	0.1936	mutect2	downstream_gene_variant	intron	pdm2	FBgn0004394
P19	2L	12850508	G	GT	ins:1	0.125	0.25	strelka	intergenic_region	intergenic	intergenic	intergenic
P19	2L	15332617	A	ATT	ins:2	0.172	0.344	mutect2	upstream_gene_variant	intergenic	intergenic	intergenic
P19	2L	17467217	AT	A	del:1	0.143	0.286	strelka	upstream_gene_variant	intron	BicD	FBgn0000183
P19	2L	19613042	CT	C	del:1	0.14	0.28	strelka	intron_variant	intron	CG46244	FBgn0267964
P19	2L	21390347	CA	C	del:1	0.19	0.38	strelka	3_prime_UTR_variant	3UTR	nrv3	FBgn0032946
P19	2L	23426223	TA	T	del:1	0.375	0.75	strelka	intergenic_region	intergenic	intergenic	intergenic
P19	2R	1594365	AT	A	del:1	0.1	0.2	strelka	downstream_gene_variant	intron	CG17691	FBgn0039993
P19	2R	5859748	AT	A	del:1	0.0741	0.1482	strelka	3_prime_UTR_variant	3UTR	dpr12	FBgn0085414
P19	2R	6893791	A	ACG	ins:2	0.0889	0.1778	strelka	intron_variant	intron	CG30158	FBgn0050158
P19	2R	7337313	GA	G	del:1	0.1	0.2	strelka	frameshift_variant	exon_9	Dscam1	FBgn0033159
P19	2R	8324856	AGAGT	A	del:4	0.119	0.238	mutect2	upstream_gene_variant	intergenic	intergenic	intergenic
P19	2R	8745529	C	CA	ins:1	0.0909	0.1818	strelka	upstream_gene_variant	intron	CG8740	FBgn0027585
P19	2R	15575333	G	GGGGAGTTT	ins:8	0.265	0.53	strelka	upstream_gene_variant	intergenic	intergenic	intergenic
P19	2R	16472862	G	GA	ins:1	0.225	0.45	strelka	downstream_gene_variant	intergenic	intergenic	intergenic
P19	2R	17495686	TA	T	del:1	0.0755	0.151	strelka	frameshift_variant	exon	CG30103	FBgn0050103
P19	2R	19063008	AATTTGT	A	del:6	0.115	0.23	strelka	upstream_gene_variant	intergenic	intergenic	intergenic
P19	2R	20099342	T	TACTATA	ins:6	0.444	0.888	strelka	intergenic_region	intergenic	intergenic	intergenic
P19	2R	20272561	C	CG	ins:1	0.0769	0.1538	mutect2	frameshift_variant	exon	CG10444	FBgn0034494
P19	2R	22460425	GTTGAATCAGTTTC	G	del:13	0.263	0.526	strelka	intron_variant	intron	CG10384	FBgn0034731
P19	2R	22692051	TA	T	del:1	0.115	0.23	strelka	upstream_gene_variant	intergenic	intergenic	intergenic
P19	2R	22812410	AT	A	del:1	0.111	0.222	strelka	frameshift_variant	exon_4	stl	FBgn0086408
P19	2R	22981735	C	CT	ins:1	0.163	0.326	strelka	upstream_gene_variant	intergenic	intergenic	intergenic
P19	3L	499906	GACATGAGAAAATAATCCGCACA	G	del:22	0.267	0.534	strelka	upstream_gene_variant	intron	klar	FBgn0001316
P19	3L	1103248	T	TTA	ins:2	0.3	0.6	strelka	upstream_gene_variant	intergenic	intergenic	intergenic
P19	3L	1103250	TAGGC	T	del:4	0.333	0.666	strelka	upstream_gene_variant	intergenic	intergenic	intergenic
P19	3L	1919568	G	GGGGGGGT	ins:7	0.133	0.266	mutect2	upstream_gene_variant	intergenic	intergenic	intergenic
P19	3L	4224699	T	TG	ins:1	0.13	0.26	strelka	3_prime_UTR_variant	3UTR	ImpL2	FBgn0001257
P19	3L	5155878	GT	G	del:1	0.278	0.556	strelka	3_prime_UTR_variant	3UTR	shep	FBgn0052423
P19	3L	5168799	GC	G	del:1	0.152	0.304	strelka	intron_variant	intron	shep	FBgn0052423
P19	3L	7161503	CCTG	C	del:3	0.129	0.258	strelka	conservative_inframe_deletion	exon	Dscam2	FBgn0265296
P19	3L	7356893	CG	C	del:1	0.125	0.25	mutect2	upstream_gene_variant	intergenic	intergenic	intergenic
P19	3L	7503674	AT	A	del:1	0.211	0.422	strelka	upstream_gene_variant	intergenic	intergenic	intergenic
P19	3L	8523538	CGCA	C	del:3	0.25	0.5	strelka	upstream_gene_variant	intergenic	intergenic	intergenic
P19	3L	9908224	AATC	A	del:3	0.182	0.364	strelka	intron_variant	intron	CG34356	FBgn0085385
P19	3L	10252069	ACAAAACCCAAT	A	del:11	0.231	0.462	strelka	upstream_gene_variant	intergenic	intergenic	intergenic
P19	3L	10934642	CT	C	del:1	0.0889	0.1778	strelka	intergenic_region	intergenic	intergenic	intergenic
P19	3L	11159508	TCAG	T	del:3	0.238	0.476	strelka	conservative_inframe_deletion	exon_8	CG32082	FBgn0052082
P19	3L	14318149	C	CT	ins:1	0.119	0.238	strelka	downstream_gene_variant	intron	fz	FBgn0001085
P19	3L	16656563	C	CA	ins:1	0.109	0.218	strelka	downstream_gene_variant	intron	Baldspot	FBgn0260960
P19	3L	16978202	TTC	T	del:2	0.0909	0.1818	mutect2	intron_variant	intron	Exn	FBgn0261547
P19	3L	18430494	C	CA	ins:1	0.111	0.222	strelka	intergenic_region	intergenic	intergenic	intergenic
P19	3L	19460063	CTA	C	del:2	0.06	0.12	mutect2	downstream_gene_variant	intergenic	intergenic	intergenic
P19	3L	19981814	T	TTA	ins:2	0.2	0.4	strelka	upstream_gene_variant	intron	CG17732	FBgn0036923
P19	3L	20055250	CA	C	del:1	0.176	0.352	mutect2,strelka	downstream_gene_variant	intergenic	intergenic	intergenic
P19	3L	21143673	C	CACTTTTCAACGAATCTCGTGTACCCATT	ins:28	0.115	0.23	strelka	intron_variant	intron	Ac78C	FBgn0024150
P19	3L	23337301	A	AT	ins:1	0.227	0.454	strelka	upstream_gene_variant	intron	alpha-Cat	FBgn0010215
P19	3L	26833122	T	TG	ins:1	0.125	0.25	strelka	intergenic_region	intergenic	intergenic	intergenic
P19	3R	447631	GT	G	del:1	0.267	0.534	strelka	intergenic_region	intergenic	intergenic	intergenic
P19	3R	1980814	A	AG	ins:1	0.13	0.26	strelka	intron_variant	intron	Myo81F	FBgn0267431
P19	3R	2517035	TTG	T	del:2	0.087	0.174	strelka	intergenic_region	intron	Myo81F	FBgn0267431
P19	3R	8060612	GA	G	del:1	0.0784	0.1568	strelka	downstream_gene_variant	intron	mAChR-B	FBgn0037546
P19	3R	8375754	C	CT	ins:1	0.222	0.444	strelka	downstream_gene_variant	intron	CG45263	FBgn0266801
P19	3R	9211639	AT	A	del:1	0.0588	0.1176	mutect2	intron_variant	intron	pum	FBgn0003165
P19	3R	11206407	GT	G	del:1	0.135	0.27	strelka	upstream_gene_variant	intron	cu	FBgn0261808
P19	3R	11578580	AGCAG	A	del:4	0.0816	0.1632	strelka	frameshift_variant	exon_1	CG6790	FBgn0037915
P19	3R	16174638	GTA	G	del:2	0.0656	0.1312	mutect2	downstream_gene_variant	intron	CG8925	FBgn0038404
P19	3R	19744261	GCA	G	del:2	0.16	0.32	strelka	intron_variant	exon_1	CR43488	FBgn0263499
P19	3R	23374941	TAC	T	del:2	0.0811	0.1622	strelka	upstream_gene_variant	intergenic	intergenic	intergenic
P19	3R	23375231	C	CTAATCATTTTTCAAACGA	ins:18	0.2	0.4	strelka	upstream_gene_variant	intergenic	intergenic	intergenic
P19	3R	24596036	G	GA	ins:1	0.156	0.312	strelka	intron_variant	intron	mld	FBgn0263490
P19	3R	25137920	GGGT	G	del:3	0.075	0.15	mutect2	upstream_gene_variant	exon_1	CR46098	FBgn0267767
P19	3R	25554690	TTG	T	del:2	0.114	0.228	strelka	upstream_gene_variant	intron	msi	FBgn0011666
P19	3R	25594655	CA	C	del:1	0.2	0.4	strelka	5_prime_UTR_variant	intron	ymp	FBgn0261287
P19	3R	26462866	G	GC	ins:1	0.353	0.706	strelka	upstream_gene_variant	intron	CG5455	FBgn0039430
P19	3R	27662305	C	CA	ins:1	0.107	0.214	mutect2,strelka	upstream_gene_variant	intergenic	intergenic	intergenic
P19	3R	28603823	TG	T	del:1	0	0	consensus	upstream_gene_variant	intron	Hrb98DE	FBgn0001215
P19	3R	28603826	TG	T	del:1	0	0	consensus	upstream_gene_variant	intron	Hrb98DE	FBgn0001215
P19	3R	28780161	TGCC	T	del:3	0.0909	0.1818	mutect2	downstream_gene_variant	intergenic	intergenic	intergenic
P19	3R	30740124	GGGTGGC	G	del:6	0.167	0.334	strelka	upstream_gene_variant	intergenic	intergenic	intergenic
P19	4	1023579	T	TA	ins:1	0.0556	0.1112	mutect2	5_prime_UTR_variant	5UTR	PlexA	FBgn0025741
P19	X	768220	CA	C	del:1	0.222	0.222	mutect2	upstream_gene_variant	intergenic	intergenic	intergenic
P19	X	771992	GT	G	del:1	0.138	0.138	strelka	intron_variant	intron	fz3	FBgn0027343
P19	X	1181365	GAA	G	del:2	0.0909	0.0909	mutect2	3_prime_UTR_variant	3UTR	CG11379	FBgn0040362
P19	X	2772795	CT	C	del:1	0.115	0.115	mutect2	intron_variant	intron	kirre	FBgn0028369
P19	X	3126349	GA	G	del:1	0.429	0.429	strelka	upstream_gene_variant	intron	kirre	FBgn0028369
P19	X	3692203	A	AT	ins:1	0.2	0.2	strelka	intron_variant	intron	Mnt	FBgn0023215
P19	X	4017699	CA	C	del:1	0.231	0.231	strelka	intergenic_region	intergenic	intergenic	intergenic
P19	X	4176065	GT	G	del:1	0.2	0.2	strelka	intron_variant	intron	Fas2	FBgn0000635
P19	X	4853063	TTC	T	del:2	0.211	0.211	strelka	intron_variant	intron	CG42594	FBgn0260971
P19	X	5596910	GT	G	del:1	0.208	0.208	strelka	intron_variant	intron	Vsx1	FBgn0263511
P19	X	6039983	GA	G	del:1	0.167	0.167	strelka	upstream_gene_variant	intergenic	intergenic	intergenic
P19	X	6535987	CCAA	C	del:3	0.087	0.087	mutect2	disruptive_inframe_deletion	exon_2	dx	FBgn0000524
P19	X	7097073	GA	G	del:1	0.263	0.263	strelka	upstream_gene_variant	intron	Sxl	FBgn0264270
P19	X	7104854	C	CT	ins:1	0.75	0.75	strelka	upstream_gene_variant	intergenic	intergenic	intergenic
P19	X	7939825	CACG	C	del:3	0.105	0.105	mutect2	conservative_inframe_deletion	exon_2	Ubr3	FBgn0260970
P19	X	8898025	G	GT	ins:1	0.143	0.143	strelka	upstream_gene_variant	intron	Moe	FBgn0011661
P19	X	9006476	CA	C	del:1	0.417	0.417	strelka	intron_variant	ncRNA	CR43836	FBgn0264384
P19	X	9032266	A	AAC	ins:2	0.182	0.182	mutect2	downstream_gene_variant	intron	Nost	FBgn0259734
P19	X	9540985	AAC	A	del:2	0.148	0.148	strelka	intron_variant	intron	CG32700	FBgn0267253
P19	X	10415159	GCA	G	del:2	0.107	0.107	strelka	upstream_gene_variant	intron	CG32683	FBgn0052683
P19	X	10619277	C	CT	ins:1	0.429	0.429	mutect2,strelka	downstream_gene_variant	intron	CG43347	FBgn0263072
P19	X	11081938	CTG	C	del:2	0.333	0.333	mutect2	downstream_gene_variant	intron	sev	FBgn0003366
P19	X	11627908	CT	C	del:1	0.731	0.731	strelka	intron_variant	intron	Ptp10D	FBgn0004370
P19	X	12742185	GCA	G	del:2	0.107	0.107	strelka	upstream_gene_variant	intron	Smr	FBgn0265523
P19	X	12845439	GA	G	del:1	0.115	0.115	strelka	intron_variant	intron	Pde9	FBgn0259171
P19	X	13024880	GAC	G	del:2	0.185	0.185	strelka	downstream_gene_variant	intron	rad	FBgn0265597
P19	X	13114608	GA	G	del:1	0.25	0.25	strelka	upstream_gene_variant	intergenic	intergenic	intergenic
P19	X	13942302	TA	T	del:1	0.212	0.212	strelka	intron_variant	intron	mamo	FBgn0267033
P19	X	14568191	TA	T	del:1	0.333	0.333	strelka	intergenic_region	intergenic	intergenic	intergenic
P19	X	15279741	G	GT	ins:1	0.227	0.227	strelka	intergenic_region	intergenic	intergenic	intergenic
P19	X	15692201	GA	G	del:1	0.111	0.111	strelka	upstream_gene_variant	exon_2	CR45523	FBgn0267079
P19	X	16144020	AG	A	del:1	0.136	0.136	strelka	intron_variant	intron	disco-r	FBgn0042650
P19	X	16440609	AT	A	del:1	0.13	0.13	strelka	upstream_gene_variant	intron	CG9947	FBgn0030752
P19	X	18423865	GCA	G	del:2	0.105	0.105	mutect2	intron_variant	intron	CG42323	FBgn0259223
P19	X	18625481	CA	C	del:1	0.176	0.176	strelka	upstream_gene_variant	intron	wgn	FBgn0030941
P19	X	19213552	GA	G	del:1	0.136	0.136	strelka	frameshift_variant	exon	Mur18B	FBgn0030999
P19	X	19366290	G	GT	ins:1	0.133	0.133	strelka	intron_variant	intron	kek5	FBgn0031016
P19	X	19446281	GT	G	del:1	0.238	0.238	strelka	5_prime_UTR_variant	exon_4	kek5	FBgn0031016
P19	X	19637285	CCA	C	del:2	0.111	0.111	strelka	5_prime_UTR_variant	exon_1	e(y)3	FBgn0087008
P19	X	20127616	AACG	A	del:3	0	0	consensus	downstream_gene_variant	intergenic	intergenic	intergenic
P19	X	20374137	CAGGA	C	del:4	0.12	0.12	mutect2	downstream_gene_variant	intergenic	intergenic	intergenic
P19	X	21171365	AT	A	del:1	0.176	0.176	strelka	intergenic_region	intergenic	intergenic	intergenic
P19	Y	71076	CA	C	del:1	0.235	0.235	strelka	intron_variant	intron	kl-5	FBgn0267433
P7	2L	5281	CA	C	del:1	0.15	0.3	strelka	upstream_gene_variant	intergenic	intergenic	intergenic
P7	2L	543686	GCGTT	G	del:4	0.111	0.222	mutect2	frameshift_variant	exon_2	Spp	FBgn0031260
P7	2L	764505	CA	C	del:1	0.19	0.38	strelka	downstream_gene_variant	intergenic	intergenic	intergenic
P7	2L	867348	GAC	G	del:2	0.174	0.348	strelka	upstream_gene_variant	intron	aru	FBgn0029095
P7	2L	903134	A	AGT	ins:2	0.0769	0.1538	mutect2	upstream_gene_variant	intergenic	intergenic	intergenic
P7	2L	953160	T	TG	ins:1	0.125	0.25	strelka	frameshift_variant	exon_5	CG4341	FBgn0028481
P7	2L	961200	A	AG	ins:1	0	0	consensus	downstream_gene_variant	intergenic	intergenic	intergenic
P7	2L	961202	AG	A	del:1	0	0	consensus	downstream_gene_variant	intergenic	intergenic	intergenic
P7	2L	1289901	G	GAAGTTATTAAAAGACCAAAGGC	ins:22	0.308	0.616	strelka	intron_variant	intron	robo3	FBgn0041097
P7	2L	1494402	GCAA	G	del:3	0.0811	0.1622	mutect2	conservative_inframe_deletion	exon	CG33128	FBgn0053128
P7	2L	1736402	TA	T	del:1	0.136	0.272	strelka	upstream_gene_variant	intron	CG17646	FBgn0264494
P7	2L	2038523	G	GA	ins:1	0.15	0.3	mutect2,strelka	upstream_gene_variant	intron	Su(dx)	FBgn0003557
P7	2L	2183734	GT	G	del:1	0.235	0.47	strelka	upstream_gene_variant	exon_1	CR43751	FBgn0265017
P7	2L	2268963	ACTC	A	del:3	0.222	0.444	mutect2	disruptive_inframe_deletion	exon	CG17242	FBgn0250841
P7	2L	2374008	CCAATAGTTT	C	del:9	0.08	0.16	mutect2	5_prime_UTR_variant	exon_1	CG3609	FBgn0031418
P7	2L	2424462	C	CA	ins:1	0.357	0.714	strelka	3_prime_UTR_variant	3UTR	CG9886	FBgn0031428
P7	2L	2941315	CA	C	del:1	0.12	0.24	strelka	intron_variant	intron	lilli	FBgn0041111
P7	2L	2950309	CCA	C	del:2	0.0952	0.1904	mutect2	frameshift_variant	exon_8	lilli	FBgn0041111
P7	2L	3109948	GT	G	del:1	0.122	0.244	mutect2	frameshift_variant	exon	PpD6	FBgn0005779
P7	2L	3222430	TTG	T	del:2	0.12	0.24	strelka	intergenic_region	intergenic	intergenic	intergenic
P7	2L	3299354	AT	A	del:1	0.115	0.23	strelka	upstream_gene_variant	intron	CG9663	FBgn0031516
P7	2L	3757817	TTG	T	del:2	0.227	0.454	strelka	5_prime_UTR_variant	5UTR	CG43707	FBgn0263846
P7	2L	4037101	CT	C	del:1	0.167	0.334	strelka	intron_variant	intron	ed	FBgn0000547
P7	2L	4161476	A	AAC	ins:2	0.188	0.376	strelka	downstream_gene_variant	intergenic	intergenic	intergenic
P7	2L	4373610	TC	T	del:1	0.12	0.24	strelka	intron_variant	intron	Traf4	FBgn0026319
P7	2L	4430292	ACT	A	del:2	0.286	0.572	strelka	upstream_gene_variant	intron	CG15431	FBgn0031602
P7	2L	4658692	GA	G	del:1	0.136	0.272	mutect2	intergenic_region	intergenic	intergenic	intergenic
P7	2L	4907427	CT	C	del:1	0.263	0.526	strelka	upstream_gene_variant	intergenic	intergenic	intergenic
P7	2L	5351224	GC	G	del:1	0.111	0.222	mutect2	intron_variant	intron	nompC	FBgn0016920
P7	2L	5385103	AG	A	del:1	0.125	0.25	strelka	upstream_gene_variant	intergenic	intergenic	intergenic
P7	2L	5593748	T	TA	ins:1	0.138	0.276	strelka	upstream_gene_variant	intergenic	intergenic	intergenic
P7	2L	5653585	T	TC	ins:1	0.158	0.316	strelka	intron_variant	intron	DIP-theta	FBgn0051646
P7	2L	5797457	TA	T	del:1	0.133	0.266	strelka	upstream_gene_variant	intron	CG9171	FBgn0031738
P7	2L	6274715	TG	T	del:1	0.125	0.25	strelka	downstream_gene_variant	intron	Ddr	FBgn0053531
P7	2L	6388339	T	TC	ins:1	0.136	0.272	strelka	upstream_gene_variant	intron	DIP-epsilon	FBgn0259714
P7	2L	6403975	AACC	A	del:3	0.13	0.26	strelka	intron_variant	intron	DIP-epsilon	FBgn0259714
P7	2L	6422640	GT	G	del:1	0.16	0.32	strelka	upstream_gene_variant	intron	Tig	FBgn0011722
P7	2L	6693130	GT	G	del:1	0.138	0.276	strelka	upstream_gene_variant	intron	Tsp	FBgn0031850
P7	2L	6737549	CA	C	del:1	0.136	0.272	strelka	upstream_gene_variant	intron	TTLL3A	FBgn0031854
P7	2L	7124584	C	CA	ins:1	0.24	0.48	mutect2	intron_variant	intron	Pvf3	FBgn0085407
P7	2L	7214825	TAA	T	del:2	0.154	0.308	mutect2	downstream_gene_variant	intron	CG13784	FBgn0031897
P7	2L	7600439	GT	G	del:1	0.143	0.286	strelka	upstream_gene_variant	intergenic	intergenic	intergenic
P7	2L	7655479	GCA	G	del:2	0.111	0.222	strelka	intron_variant	intron	Slob	FBgn0264087
P7	2L	7671174	CG	C	del:1	0.103	0.206	strelka	intron_variant	intron	Myo28B1	FBgn0040299
P7	2L	7716996	TA	T	del:1	0.0625	0.125	mutect2	3_prime_UTR_variant	3UTR	CG13793	FBgn0031935
P7	2L	7792410	T	TG	ins:1	0.138	0.276	strelka	frameshift_variant	exon_6	LKRSDH	FBgn0025687
P7	2L	7807858	CCT	C	del:2	0.129	0.258	strelka	upstream_gene_variant	intron	cdc14	FBgn0031952
P7	2L	7830140	TTC	T	del:2	0	0	consensus	upstream_gene_variant	intron	mts	FBgn0004177
P7	2L	8141355	G	GT	ins:1	0.192	0.384	strelka	upstream_gene_variant	intron	PAPLA1	FBgn0031990
P7	2L	8733299	GT	G	del:1	0.138	0.276	strelka	intron_variant	intron	raw	FBgn0003209
P7	2L	9181087	A	AATAAAATAAGCCCC	ins:14	0.263	0.526	strelka	intron_variant	intron	tai	FBgn0041092
P7	2L	9328235	TCG	T	del:2	0.148	0.296	mutect2,strelka	frameshift_variant	exon_2	CG17005	FBgn0032109
P7	2L	9559960	GA	G	del:1	0.12	0.24	strelka	intron_variant	intron	jp	FBgn0032129
P7	2L	9894539	GAGA	G	del:3	0.0909	0.1818	mutect2	upstream_gene_variant	snoRNA	snoRNA:Me18S-G1620	FBgn0063389
P7	2L	9938353	GC	G	del:1	0.12	0.24	strelka	frameshift_variant	exon	Apf	FBgn0051713
P7	2L	9945846	A	AG	ins:1	0.103	0.206	strelka	upstream_gene_variant	intron	CG5853	FBgn0032167
P7	2L	9965510	TG	T	del:1	0.16	0.32	strelka	frameshift_variant	exon_2	Dref	FBgn0015664
P7	2L	9986819	CA	C	del:1	0.114	0.228	strelka	frameshift_variant	exon_2	bib	FBgn0000180
P7	2L	10027264	AT	A	del:1	0.0976	0.1952	strelka	frameshift_variant	exon	CG13127	FBgn0032176
P7	2L	10253852	CT	C	del:1	0.2	0.4	strelka	frameshift_variant	exon_6	Ror	FBgn0010407
P7	2L	10932066	TTG	T	del:2	0.16	0.32	strelka	upstream_gene_variant	intron	dpr2	FBgn0261871
P7	2L	11023835	GTT	G	del:2	0	0	consensus	downstream_gene_variant	intron	Samuel	FBgn0032330
P7	2L	11038711	AT	A	del:1	0.136	0.272	strelka	downstream_gene_variant	intron	Samuel	FBgn0032330
P7	2L	11299585	TA	T	del:1	0.13	0.26	strelka	intergenic_region	intergenic	intergenic	intergenic
P7	2L	11384639	CAT	C	del:2	0.143	0.286	mutect2,strelka	downstream_gene_variant	intergenic	intergenic	intergenic
P7	2L	11420777	TC	T	del:1	0.138	0.276	strelka	intergenic_region	intergenic	intergenic	intergenic
P7	2L	11506572	GA	G	del:1	0.111	0.222	mutect2,strelka	frameshift_variant	exon_2	spz4	FBgn0032362
P7	2L	11603623	CT	C	del:1	0.143	0.286	strelka	intron_variant	intron	kek2	FBgn0015400
P7	2L	11611734	TC	T	del:1	0.138	0.276	strelka	5_prime_UTR_variant	5UTR	spag4	FBgn0032368
P7	2L	11908081	T	TC	ins:1	0.176	0.352	mutect2,strelka	intron_variant	intron	Pde1c	FBgn0264815
P7	2L	11950678	T	TA	ins:1	0.75	1	strelka	downstream_gene_variant	intergenic	intergenic	intergenic
P7	2L	11970988	C	CCT	ins:2	0.161	0.322	strelka	non_coding_transcript_exon_variant	exon_1	CR43314	FBgn0263019
P7	2L	12363729	CT	C	del:1	0.107	0.214	mutect2	upstream_gene_variant	intron	bru2	FBgn0262475
P7	2L	12514215	G	GCAGAGTGGCACCAA	ins:14	0.391	0.782	strelka	intron_variant	intron	bun	FBgn0259176
P7	2L	12612853	CA	C	del:1	0.188	0.376	mutect2	upstream_gene_variant	intron	Ref2	FBgn0032439
P7	2L	13167961	AGTTGCGATC	A	del:9	0.087	0.174	mutect2	conservative_inframe_deletion	exon	Sirt1	FBgn0024291
P7	2L	13344532	AT	A	del:1	0.138	0.276	strelka	upstream_gene_variant	intergenic	intergenic	intergenic
P7	2L	14167809	AGG	A	del:2	0.125	0.25	strelka	upstream_gene_variant	intron	CG43333	FBgn0263038
P7	2L	14476854	TA	T	del:1	0.115	0.23	strelka	intergenic_region	intergenic	intergenic	intergenic
P7	2L	14493977	TA	T	del:1	0.3	0.6	mutect2	3_prime_UTR_variant	3UTR	noc	FBgn0005771
P7	2L	14811069	CTA	C	del:2	0.13	0.26	mutect2,strelka	frameshift_variant	exon	CG33309	FBgn0053309
P7	2L	15594912	CT	C	del:1	0.114	0.228	strelka	intergenic_region	intergenic	intergenic	intergenic
P7	2L	15756315	T	TTAC	ins:3	0.0816	0.1632	strelka	3_prime_UTR_variant	exon_8	Gli	FBgn0001987
P7	2L	16558119	G	GA	ins:1	0.138	0.276	strelka	frameshift_variant&start_lost	5UTR	CG42389	FBgn0259735
P7	2L	17093479	TC	T	del:1	0.125	0.25	strelka	downstream_gene_variant	intergenic	intergenic	intergenic
P7	2L	17343646	TTG	T	del:2	0.125	0.25	strelka	intergenic_region	intergenic	intergenic	intergenic
P7	2L	17719423	ACCCTTGT	A	del:7	0.1	0.2	mutect2	frameshift_variant	exon_5	CadN	FBgn0015609
P7	2L	17799391	TTC	T	del:2	0.111	0.222	mutect2,strelka	frameshift_variant	exon_9	CadN2	FBgn0262018
P7	2L	17948288	A	AAC	ins:2	0.0952	0.1904	mutect2	downstream_gene_variant	exon_2	CR44398	FBgn0265548
P7	2L	17995620	A	AT	ins:1	0.12	0.24	mutect2	upstream_gene_variant	intergenic	intergenic	intergenic
P7	2L	18088167	GT	G	del:1	0.158	0.316	strelka	downstream_gene_variant	intergenic	intergenic	intergenic
P7	2L	18644409	CTA	C	del:2	0.103	0.206	strelka	intron_variant	intron	MESR3	FBgn0032694
P7	2L	18859828	TTTA	T	del:3	0.0556	0.1112	mutect2	3_prime_UTR_variant	3UTR	tup	FBgn0003896
P7	2L	19020828	GA	G	del:1	0.111	0.222	strelka	upstream_gene_variant	intergenic	intergenic	intergenic
P7	2L	20052384	AG	A	del:1	0.148	0.296	strelka	intron_variant	intron	sNPF	FBgn0032840
P7	2L	20226036	GGT	G	del:2	0.25	0.5	strelka	intergenic_region	intergenic	intergenic	intergenic
P7	2L	20365188	CA	C	del:1	0.111	0.222	strelka	3_prime_UTR_variant	3UTR	RtGEF	FBgn0015803
P7	2L	20697696	T	TA	ins:1	0.154	0.308	strelka	intron_variant	intron	Hr38	FBgn0014859
P7	2L	21086445	GA	G	del:1	0.257	0.514	mutect2	5_prime_UTR_variant	5UTR	CG33509	FBgn0053509
P7	2L	21790838	CA	C	del:1	0.136	0.272	strelka	intron_variant	intron	CG31612	FBgn0051612
P7	2L	22138218	ACG	A	del:2	0.121	0.242	strelka	upstream_gene_variant	intron	CG42748	FBgn0261802
P7	2L	22341196	GGT	G	del:2	0.12	0.24	strelka	intron_variant	pseudogene	CR43359	FBgn0263091
P7	2L	22673061	AG	A	del:1	0.19	0.38	strelka	intron_variant	intron	CG40006	FBgn0058006
P7	2L	22692280	ATT	A	del:2	0.214	0.428	mutect2,strelka	intron_variant	intron	CG40006	FBgn0058006
P7	2R	503075	AT	A	del:1	0.0784	0.1568	mutect2,strelka	intron_variant	intron	CG45781	FBgn0267428
P7	2R	1756658	C	CA	ins:1	0.3	0.6	mutect2	intron_variant	intron	CG41520	FBgn0087011
P7	2R	2184218	AT	A	del:1	0.129	0.258	strelka	intron_variant	intron	CG17684	FBgn0263780
P7	2R	3010728	TGATAATATATGTATACCATGCTTGGTGATCGC	T	del:32	0.235	0.47	strelka	intergenic_region	intergenic	intergenic	intergenic
P7	2R	3114803	CCAAT	C	del:4	0.12	0.24	mutect2	intron_variant	intron	dpr21	FBgn0260995
P7	2R	4547646	GA	G	del:1	0.148	0.296	strelka	intron_variant	intron	Stlk	FBgn0046692
P7	2R	4777569	GACAAAACCATAGAAAGT	G	del:17	0.381	0.762	strelka	downstream_gene_variant	intergenic	intergenic	intergenic
P7	2R	5070343	AT	A	del:1	0.167	0.334	strelka	upstream_gene_variant	intergenic	intergenic	intergenic
P7	2R	5322008	A	AAC	ins:2	0.087	0.174	mutect2	intron_variant	intron	sxc	FBgn0261403
P7	2R	5535146	CG	C	del:1	0.333	0.666	strelka	intron_variant	intron	CG30438	FBgn0050438
P7	2R	5758149	C	CTG	ins:2	0.12	0.24	strelka	frameshift_variant	exon	CG7791	FBgn0033038
P7	2R	6541801	T	TCA	ins:2	0.121	0.242	strelka	intron_variant	intron	jing	FBgn0086655
P7	2R	6593666	AC	A	del:1	0.107	0.214	strelka	intron_variant	intron	jing	FBgn0086655
P7	2R	7280231	CCA	C	del:2	0.211	0.422	mutect2,strelka	frameshift_variant	exon_4	Incenp	FBgn0260991
P7	2R	7664680	G	GC	ins:1	0.12	0.24	strelka	frameshift_variant	exon_4	CG2065	FBgn0033204
P7	2R	7735525	T	TG	ins:1	0.1	0.2	mutect2	5_prime_UTR_variant	exon_1	CG18812	FBgn0042135
P7	2R	7903821	CA	C	del:1	0.125	0.25	strelka	intron_variant	intron	CG30377	FBgn0050377
P7	2R	8101497	G	GC	ins:1	0.174	0.348	strelka	frameshift_variant	exon	CG11210	FBgn0033259
P7	2R	8616410	CG	C	del:1	0.107	0.214	strelka	frameshift_variant	5UTR	Cirl	FBgn0033313
P7	2R	8805031	GT	G	del:1	0.115	0.23	strelka	intron_variant	intron	sns	FBgn0024189
P7	2R	9714852	ATT	A	del:2	0.115	0.23	mutect2,strelka	upstream_gene_variant	intron	dap	FBgn0010316
P7	2R	9818063	C	CA	ins:1	0.242	0.484	mutect2	frameshift_variant	exon	lectin-46Ca	FBgn0040093
P7	2R	10796415	A	AAC	ins:2	0	0	consensus	downstream_gene_variant	intron	CG33144	FBgn0053144
P7	2R	10912176	G	GT	ins:1	0.118	0.236	strelka	downstream_gene_variant	intergenic	intergenic	intergenic
P7	2R	11207806	TA	T	del:1	0.103	0.206	strelka	intron_variant	intron	shn	FBgn0003396
P7	2R	11265321	TGTA	T	del:3	0.176	0.352	mutect2,strelka	disruptive_inframe_deletion	exon_1	Cpr47Ee	FBgn0033602
P7	2R	11386748	G	GT	ins:1	0.105	0.21	strelka	frameshift_variant	exon_3	sprt	FBgn0082585
P7	2R	11405805	TGAG	T	del:3	0.0952	0.1904	mutect2	conservative_inframe_deletion	exon_1	Smyd4-3	FBgn0033633
P7	2R	11592861	TG	T	del:1	0.25	0.5	strelka	upstream_gene_variant	intron	tou	FBgn0033636
P7	2R	11696009	TA	T	del:1	0.107	0.214	strelka	3_prime_UTR_variant	3UTR	CG13197	FBgn0062449
P7	2R	11854449	CGATCA	C	del:5	0.0909	0.1818	mutect2	frameshift_variant	exon_2	Mtor	FBgn0013756
P7	2R	11983604	AG	A	del:1	0.107	0.214	strelka	frameshift_variant	exon	RnrS	FBgn0011704
P7	2R	12386872	AT	A	del:1	0.182	0.364	strelka	5_prime_UTR_variant	5UTR	Cpr49Ac	FBgn0033725
P7	2R	12534599	G	GTTT	ins:3	0.429	0.858	strelka	intron_variant	intron	fra	FBgn0011592
P7	2R	12754042	GGT	G	del:2	0.308	0.616	mutect2	frameshift_variant	exon_3	Taz	FBgn0026619
P7	2R	12801102	C	CTCCCCT	ins:6	0.273	0.546	strelka	3_prime_UTR_variant	3UTR	sca	FBgn0003326
P7	2R	12981867	T	TAC	ins:2	0.182	0.364	mutect2	upstream_gene_variant	intergenic	intergenic	intergenic
P7	2R	13197111	TA	T	del:1	0.2	0.4	strelka	upstream_gene_variant	intron	Kdm4B	FBgn0053182
P7	2R	14044315	CACACACAGAG	C	del:10	0.214	0.428	mutect2	intron_variant	intron	mam	FBgn0002643
P7	2R	14393204	TTA	T	del:2	0.158	0.316	mutect2,strelka	downstream_gene_variant	intergenic	intergenic	intergenic
P7	2R	14486457	T	TA	ins:1	0.133	0.266	strelka	intron_variant	intron	PRAS40	FBgn0267824
P7	2R	14532843	T	TTGA	ins:3	0.133	0.266	mutect2	intron_variant	intron	ttv	FBgn0265974
P7	2R	14581952	GT	G	del:1	0.143	0.286	strelka	intron_variant	intron	ttv	FBgn0265974
P7	2R	14941769	AC	A	del:1	0.148	0.296	strelka	upstream_gene_variant	intergenic	intergenic	intergenic
P7	2R	14991478	GA	G	del:1	0.16	0.32	strelka	upstream_gene_variant	intron	CG7639	FBgn0033989
P7	2R	15074732	CGA	C	del:2	0.148	0.296	strelka	intergenic_region	intergenic	intergenic	intergenic
P7	2R	15453875	GTAACCACATA	G	del:10	0.133	0.266	mutect2	intron_variant	intron	CG43729	FBgn0263980
P7	2R	15570424	GCA	G	del:2	0.114	0.228	strelka	frameshift_variant	exon_3	Cdk5	FBgn0013762
P7	2R	15591283	TG	T	del:1	0.231	0.462	mutect2,strelka	intergenic_region	intergenic	intergenic	intergenic
P7	2R	16091298	AC	A	del:1	0.108	0.216	mutect2	intron_variant	intron	Dg	FBgn0034072
P7	2R	16478448	C	CG	ins:1	0.19	0.38	mutect2,strelka	intergenic_region	intergenic	intergenic	intergenic
P7	2R	16519668	CTTATTTATTTTCAACTCTCTTGGTATATAGTTTTTA	C	del:36	0.4	0.8	strelka	intron_variant	intron	Sema-2a	FBgn0011260
P7	2R	16798841	T	TA	ins:1	0.125	0.25	strelka	upstream_gene_variant	intergenic	intergenic	intergenic
P7	2R	16921715	A	AT	ins:1	0.25	0.5	strelka	upstream_gene_variant	intergenic	intergenic	intergenic
P7	2R	16973900	TA	T	del:1	0.107	0.214	strelka	upstream_gene_variant	intergenic	intergenic	intergenic
P7	2R	18319992	CCGT	C	del:3	0.174	0.348	mutect2,strelka	intron_variant	intron	sbb	FBgn0010575
P7	2R	18347030	AAC	A	del:2	0.136	0.272	mutect2	intron_variant	intron	sbb	FBgn0010575
P7	2R	18746808	TAG	T	del:2	0.111	0.222	mutect2	upstream_gene_variant	intron	Hs3st-A	FBgn0053147
P7	2R	18816398	TC	T	del:1	0.114	0.228	mutect2,strelka	5_prime_UTR_variant	exon_1	CR46234	FBgn0267954
P7	2R	19214922	AT	A	del:1	0.182	0.364	strelka	intron_variant	intron	hppy	FBgn0263395
P7	2R	19423599	CT	C	del:1	0.143	0.286	strelka	5_prime_UTR_variant	exon_2	hts	FBgn0263391
P7	2R	19648686	CAT	C	del:2	0.13	0.26	mutect2,strelka	upstream_gene_variant	intergenic	intergenic	intergenic
P7	2R	19691139	G	GC	ins:1	0.176	0.352	mutect2,strelka	upstream_gene_variant	intergenic	intergenic	intergenic
P7	2R	19722626	T	TA	ins:1	0.105	0.21	strelka	upstream_gene_variant	intergenic	intergenic	intergenic
P7	2R	19767151	AT	A	del:1	0.161	0.322	strelka	upstream_gene_variant	intergenic	intergenic	intergenic
P7	2R	19982274	TG	T	del:1	0.0882	0.1764	strelka	intron_variant	intron	CG8654	FBgn0034479
P7	2R	20123563	GCA	G	del:2	0.235	0.47	mutect2,strelka	intergenic_region	intergenic	intergenic	intergenic
P7	2R	21155868	CA	C	del:1	0.111	0.222	strelka	frameshift_variant	exon_3	CG30389	FBgn0050389
P7	2R	22381867	AC	A	del:1	0.15	0.3	strelka	frameshift_variant	exon_3	wrapper	FBgn0025878
P7	2R	22785686	CT	C	del:1	0.158	0.316	strelka	downstream_gene_variant	intron	CG42260	FBgn0259145
P7	2R	22805652	T	TAAAACGATC	ins:9	0.286	0.572	strelka	upstream_gene_variant	intron	CycB	FBgn0000405
P7	2R	22912637	CT	C	del:1	0.111	0.222	strelka	frameshift_variant	exon_6	nahoda	FBgn0034797
P7	2R	23045475	CA	C	del:1	0.13	0.26	strelka	upstream_gene_variant	intron	twi	FBgn0003900
P7	2R	23099760	T	TAC	ins:2	0.174	0.348	strelka	downstream_gene_variant	intergenic	intergenic	intergenic
P7	2R	23395350	AC	A	del:1	0.13	0.26	strelka	5_prime_UTR_variant	5UTR	CG3530	FBgn0028497
P7	2R	23453877	GAC	G	del:2	0.15	0.3	mutect2,strelka	downstream_gene_variant	intron	CG43795	FBgn0264339
P7	2R	23813384	CT	C	del:1	0.12	0.24	strelka	frameshift_variant	exon_1	CR44807	FBgn0266042
P7	2R	23901272	T	TG	ins:1	0.143	0.286	strelka	frameshift_variant	exon_5	Lpt	FBgn0263667
P7	2R	24561772	CCGA	C	del:3	0.125	0.25	mutect2	5_prime_UTR_variant	5UTR	CG11414	FBgn0035024
P7	2R	24740845	AGCAG	A	del:4	0.189	0.378	strelka	upstream_gene_variant	intergenic	intergenic	intergenic
P7	2R	24762758	ATC	A	del:2	0.1	0.2	mutect2	frameshift_variant	exon	CG12848	FBgn0040666
P7	2R	24908472	CA	C	del:1	0.2	0.4	mutect2,strelka	splice_region_variant&intron_variant	exon_13	NaCP60E	FBgn0085434
P7	2R	24916333	TA	T	del:1	0.13	0.26	mutect2	intron_variant	intron	NaCP60E	FBgn0085434
P7	2R	25039418	AT	A	del:1	0.115	0.23	strelka	3_prime_UTR_variant	3UTR	Nplp1	FBgn0035092
P7	3L	256679	CT	C	del:1	0.115	0.23	strelka	frameshift_variant	exon_3	DIP2	FBgn0024806
P7	3L	272452	TA	T	del:1	0.154	0.308	strelka	frameshift_variant	exon	CG32845	FBgn0052845
P7	3L	276107	CG	C	del:1	0.2	0.4	mutect2,strelka	frameshift_variant	exon	ttm2	FBgn0035124
P7	3L	356932	CTT	C	del:2	0.12	0.24	mutect2	frameshift_variant	exon	CG1231	FBgn0035134
P7	3L	368128	T	TGG	ins:2	0.08	0.16	mutect2	frameshift_variant	exon	trh	FBgn0262139
P7	3L	628755	TA	T	del:1	0.375	0.75	strelka	non_coding_transcript_exon_variant	exon_1	CR43334	FBgn0263039
P7	3L	685286	CTG	C	del:2	0.167	0.334	strelka	5_prime_UTR_variant	5UTR	ebd1	FBgn0035153
P7	3L	731367	GGC	G	del:2	0.158	0.316	strelka	intergenic_region	intergenic	intergenic	intergenic
P7	3L	762041	GGCT	G	del:3	0.087	0.174	mutect2	intergenic_region	intergenic	intergenic	intergenic
P7	3L	1137998	GCA	G	del:2	0.139	0.278	strelka	downstream_gene_variant	intergenic	intergenic	intergenic
P7	3L	1423067	AG	A	del:1	0.133	0.266	strelka	frameshift_variant	exon	CG9173	FBgn0035218
P7	3L	1453206	T	TCC	ins:2	0.158	0.316	strelka	intron_variant	intron	Ptp61F	FBgn0267487
P7	3L	1810728	AGT	A	del:2	0.211	0.422	mutect2,strelka	upstream_gene_variant	intron	GV1	FBgn0027790
P7	3L	2160283	CGT	C	del:2	0.171	0.342	mutect2	splice_region_variant&intron_variant	intron	CG15822	FBgn0035308
P7	3L	2604836	CG	C	del:1	0.12	0.24	mutect2	downstream_gene_variant	intron	Pxn	FBgn0011828
P7	3L	3014439	C	CG	ins:1	0.16	0.32	mutect2,strelka	downstream_gene_variant	intergenic	intergenic	intergenic
P7	3L	3170136	AC	A	del:1	0.133	0.266	strelka	frameshift_variant	exon	CG32281	FBgn0052281
P7	3L	3554004	A	AT	ins:1	0.158	0.316	mutect2	downstream_gene_variant	intron	Eip63E	FBgn0005640
P7	3L	3590478	CT	C	del:1	0.261	0.522	strelka	upstream_gene_variant	intron	Eip63E	FBgn0005640
P7	3L	3590478	C	CT	ins:1	0.19	0.38	strelka	upstream_gene_variant	intron	Eip63E	FBgn0005640
P7	3L	3721919	G	GGAA	ins:3	0.115	0.23	mutect2	intron_variant	intron	CG32264	FBgn0052264
P7	3L	4073593	G	GAAAACTGCTT	ins:10	0.35	0.7	strelka	upstream_gene_variant	intron	Faa	FBgn0016013
P7	3L	5136627	GA	G	del:1	0.211	0.422	mutect2	frameshift_variant	exon_1	CG4611	FBgn0035591
P7	3L	5284136	CA	C	del:1	0.0938	0.1876	mutect2	intergenic_region	intergenic	intergenic	intergenic
P7	3L	5515914	CGTTTCGAATGTGGGAG	C	del:16	0.4	0.8	strelka	intron_variant	intron	Lkr	FBgn0035610
P7	3L	5515942	C	CCA	ins:2	0.394	0.788	strelka	intron_variant	intron	Lkr	FBgn0035610
P7	3L	5616857	AG	A	del:1	0.167	0.334	strelka	intergenic_region	intergenic	intergenic	intergenic
P7	3L	5998818	TCGA	T	del:3	0.13	0.26	strelka	intron_variant	intron	PVRAP	FBgn0052406
P7	3L	6051594	TGCTG	T	del:4	0.13	0.26	mutect2,strelka	frameshift_variant	exon	Jon65Aiii	FBgn0035665
P7	3L	6343885	C	CCGA	ins:3	0.111	0.222	strelka	intron_variant	intron	CG13300	FBgn0035699
P7	3L	6631217	C	CCA	ins:2	0.176	0.352	mutect2,strelka	intron_variant	intron	GluRIA	FBgn0004619
P7	3L	6811951	CATTAGCAGTAATTGG	C	del:15	0.4	0.8	strelka	intergenic_region	intergenic	intergenic	intergenic
P7	3L	6924952	AG	A	del:1	0.154	0.308	strelka	intergenic_region	intergenic	intergenic	intergenic
P7	3L	6960632	TCG	T	del:2	0.0952	0.1904	mutect2	frameshift_variant	exon	sgl	FBgn0261445
P7	3L	7028569	AT	A	del:1	0.13	0.26	strelka	upstream_gene_variant	intron	Mp	FBgn0260660
P7	3L	7098777	GA	G	del:1	0.222	0.444	strelka	downstream_gene_variant	intron	form3	FBgn0053556
P7	3L	7186346	CA	C	del:1	0.286	0.572	strelka	intron_variant	intron	Dscam2	FBgn0265296
P7	3L	7248438	CA	C	del:1	0.176	0.352	strelka	splice_region_variant&intron_variant	intron	Cdc27	FBgn0012058
P7	3L	7325411	AT	A	del:1	0.136	0.272	strelka	frameshift_variant	exon_4	Rint1	FBgn0035762
P7	3L	7410249	GCA	G	del:2	0.133	0.266	strelka	upstream_gene_variant	intergenic	intergenic	intergenic
P7	3L	7721019	CGT	C	del:2	0.12	0.24	mutect2,strelka	frameshift_variant	3UTR	CG7457	FBgn0035812
P7	3L	8011095	GA	G	del:1	0.333	0.666	strelka	intron_variant	intron	nmo	FBgn0011817
P7	3L	8109035	C	CT	ins:1	0.143	0.286	strelka	upstream_gene_variant	intergenic	intergenic	intergenic
P7	3L	8323943	CAT	C	del:2	0.105	0.21	mutect2	upstream_gene_variant	intergenic	intergenic	intergenic
P7	3L	8376505	GA	G	del:1	0.2	0.4	strelka	intron_variant	intron	ImpE1	FBgn0001253
P7	3L	8550592	G	GGTATATGATTT	ins:11	0.25	0.5	strelka	intron_variant	intron	rhea	FBgn0260442
P7	3L	8550595	T	TA	ins:1	0.25	0.5	strelka	intron_variant	intron	rhea	FBgn0260442
P7	3L	8969811	GAGC	G	del:3	0.105	0.21	strelka	conservative_inframe_deletion	exon_3	CG5026	FBgn0035945
P7	3L	9251707	G	GA	ins:1	0.125	0.25	strelka	upstream_gene_variant	intergenic	intergenic	intergenic
P7	3L	9268110	CGT	C	del:2	0.207	0.414	strelka	intron_variant	intron	GluRIB	FBgn0264000
P7	3L	9499137	TG	T	del:1	0.118	0.236	strelka	upstream_gene_variant	intron	path	FBgn0036007
P7	3L	9633099	CCCGAGAACTGAGCAAAT	C	del:17	0.08	0.16	mutect2	frameshift_variant	exon_24	fry	FBgn0016081
P7	3L	9669425	CT	C	del:1	0.125	0.25	strelka	frameshift_variant	exon_4	fry	FBgn0016081
P7	3L	10023033	TA	T	del:1	0.13	0.26	strelka	intron_variant	intron	dpr6	FBgn0040823
P7	3L	10085371	CATTTT	C	del:5	0.13	0.26	mutect2,strelka	downstream_gene_variant	intron	dpr6	FBgn0040823
P7	3L	10120253	CA	C	del:1	0.13	0.26	strelka	intron_variant	intron	dpr6	FBgn0040823
P7	3L	10146038	T	TTA	ins:2	0.143	0.286	strelka	downstream_gene_variant	intergenic	intergenic	intergenic
P7	3L	10291246	C	CA	ins:1	0.13	0.26	strelka	non_coding_transcript_exon_variant	exon_1	CR46003	FBgn0267665
P7	3L	10502093	AAGCATAAAACAAGACACCAAAGAAAAATAAAAACGCAGCGTGC	A	del:43	0.333	0.666	strelka	intron_variant	intron	Rbfox1	FBgn0052062
P7	3L	11121393	T	TC	ins:1	0.12	0.24	strelka	frameshift_variant	exon_1	mRpL2	FBgn0036135
P7	3L	11220624	G	GC	ins:1	0.107	0.214	mutect2	intron_variant	intron	CG42671	FBgn0261553
P7	3L	11290288	TG	T	del:1	0.115	0.23	strelka	intron_variant	intron	CG6175	FBgn0036152
P7	3L	11778805	GA	G	del:1	0.346	0.692	mutect2	frameshift_variant	exon	CG14131	FBgn0036205
P7	3L	12125880	GAT	G	del:2	0.0952	0.1904	mutect2	frameshift_variant	exon	Ir68b	FBgn0036250
P7	3L	12535813	A	AT	ins:1	0.136	0.272	strelka	frameshift_variant	exon	CG4069	FBgn0036301
P7	3L	13188108	TG	T	del:1	0.12	0.24	strelka	intergenic_region	intergenic	intergenic	intergenic
P7	3L	13863531	CT	C	del:1	0.136	0.272	strelka	downstream_gene_variant	intron	CG8745	FBgn0036381
P7	3L	14444210	CA	C	del:1	0.182	0.364	strelka	intron_variant	intron	bbg	FBgn0087007
P7	3L	14683829	CA	C	del:1	0.12	0.24	strelka	upstream_gene_variant	intron	ome	FBgn0259175
P7	3L	15269672	T	TC	ins:1	0.231	0.462	strelka	intergenic_region	intergenic	intergenic	intergenic
P7	3L	15300407	CTT	C	del:2	0.1	0.2	mutect2	frameshift_variant	exon_5	Best4	FBgn0036491
P7	3L	15474990	C	CG	ins:1	0.158	0.316	strelka	upstream_gene_variant	intergenic	intergenic	intergenic
P7	3L	15907204	CG	C	del:1	0.167	0.334	strelka	intron_variant	intron	sff	FBgn0036544
P7	3L	15991551	GACTACGCAACCTTCACAGCCGACAGCTCTCTAGGATCGACT	G	del:41	0.286	0.572	strelka	3_prime_UTR_variant	3UTR	Hip14	FBgn0259824
P7	3L	16154443	GT	G	del:1	0.188	0.376	strelka	intron_variant	intron	CG5151	FBgn0036576
P7	3L	16166127	GT	G	del:1	0.125	0.25	strelka	upstream_gene_variant	intergenic	intergenic	intergenic
P7	3L	16902279	GCA	G	del:2	0.133	0.266	mutect2	intron_variant	intron	Lmpt	FBgn0261565
P7	3L	16903546	AT	A	del:1	0.0938	0.1876	mutect2	frameshift_variant	exon	Lmpt	FBgn0261565
P7	3L	17213462	GA	G	del:1	0.1	0.2	mutect2	intron_variant	intron	Rbp6	FBgn0260943
P7	3L	17276543	AT	A	del:1	0.167	0.334	mutect2,strelka	upstream_gene_variant	intergenic	intergenic	intergenic
P7	3L	17420701	TA	T	del:1	0.2	0.4	mutect2,strelka	upstream_gene_variant	intron	blot	FBgn0027660
P7	3L	17424914	CTG	C	del:2	0.13	0.26	mutect2	frameshift_variant	exon_1	Sec3	FBgn0266669
P7	3L	17963767	TAAA	T	del:3	0.087	0.174	mutect2	upstream_gene_variant	intron	Eip75B	FBgn0000568
P7	3L	17994671	GT	G	del:1	0.217	0.434	strelka	intron_variant	intron	Eip75B	FBgn0000568
P7	3L	18138438	CA	C	del:1	0.0833	0.1666	mutect2	upstream_gene_variant	intergenic	intergenic	intergenic
P7	3L	18200231	AG	A	del:1	0.093	0.186	strelka	upstream_gene_variant	intergenic	intergenic	intergenic
P7	3L	18937699	TAGCTTATC	T	del:8	0.138	0.276	strelka	intron_variant	intron	CG32204	FBgn0052204
P7	3L	18978308	T	TGAA	ins:3	0.087	0.174	mutect2	upstream_gene_variant	intergenic	intergenic	intergenic
P7	3L	19274806	C	CA	ins:1	0.13	0.26	mutect2	upstream_gene_variant	intergenic	intergenic	intergenic
P7	3L	19936997	A	AC	ins:1	0.125	0.25	strelka	upstream_gene_variant	intergenic	intergenic	intergenic
P7	3L	20208897	GCAC	G	del:3	0.103	0.206	strelka	disruptive_inframe_deletion	exon	CG6996	FBgn0036950
P7	3L	21151098	G	GC	ins:1	0.182	0.364	strelka	upstream_gene_variant	intron	Ac78C	FBgn0024150
P7	3L	21389922	GA	G	del:1	0.125	0.25	strelka	intron_variant	intron	rgn	FBgn0261258
P7	3L	21578852	T	TA	ins:1	0.15	0.3	strelka	upstream_gene_variant	intergenic	intergenic	intergenic
P7	3L	21676355	GGC	G	del:2	0.115	0.23	mutect2,strelka	frameshift_variant	exon_3	Als2	FBgn0037116
P7	3L	21739282	T	TC	ins:1	0.103	0.206	mutect2	upstream_gene_variant	intergenic	intergenic	intergenic
P7	3L	21852303	TGAGTGGTCCCAGGAAACGGCTGCTGCTCCTCTAATACTC	T	del:39	0.286	0.572	strelka	downstream_gene_variant	intron	mub	FBgn0262737
P7	3L	22302221	AGAGAAAATAATT	A	del:12	0.118	0.236	mutect2,strelka	intron_variant	intron	Ten-m	FBgn0004449
P7	3L	22569363	A	AT	ins:1	0.103	0.206	strelka	downstream_gene_variant	intergenic	intergenic	intergenic
P7	3L	22889062	AC	A	del:1	0.114	0.228	strelka	upstream_gene_variant	intron	slif	FBgn0037203
P7	3L	23505506	ACC	A	del:2	0.182	0.364	strelka	intergenic_region	intergenic	intergenic	intergenic
P7	3L	23579207	CT	C	del:1	0.211	0.422	strelka	intron_variant	intron	AGO3	FBgn0250816
P7	3L	23798013	TA	T	del:1	0.0968	0.1936	mutect2	intergenic_region	intergenic	intergenic	intergenic
P7	3L	24269284	C	CA	ins:1	0.121	0.242	strelka	intron_variant	intron	Snap25	FBgn0011288
P7	3L	24934648	AT	A	del:1	0.133	0.266	strelka	intergenic_region	intergenic	intergenic	intergenic
P7	3L	26479630	TAC	T	del:2	0.158	0.316	strelka	intergenic_region	intergenic	intergenic	intergenic
P7	3L	27678150	C	CA	ins:1	0.143	0.286	strelka	intergenic_region	intergenic	intergenic	intergenic
P7	3R	1015432	GA	G	del:1	0.188	0.376	strelka	intron_variant	intron	Myo81F	FBgn0267431
P7	3R	1194838	GA	G	del:1	0.154	0.308	strelka	intron_variant	intron	Myo81F	FBgn0267431
P7	3R	1312478	ATT	A	del:2	0.4	0.8	strelka	intron_variant	intron	Myo81F	FBgn0267431
P7	3R	1424912	CA	C	del:1	0.211	0.422	strelka	intron_variant	intron	Myo81F	FBgn0267431
P7	3R	1859092	C	CA	ins:1	0.174	0.348	strelka	intron_variant	intron	Myo81F	FBgn0267431
P7	3R	2460747	GA	G	del:1	0.13	0.26	strelka	intron_variant	intron	Myo81F	FBgn0267431
P7	3R	2949911	G	GC	ins:1	0.125	0.25	strelka	intron_variant	intron	Pzl	FBgn0267430
P7	3R	4244029	TA	T	del:1	0.125	0.25	strelka	upstream_gene_variant	pseudogene	TwdlU	FBgn0037223
P7	3R	4461704	CA	C	del:1	0.125	0.25	strelka	downstream_gene_variant	intron	CG31522	FBgn0051522
P7	3R	4648038	T	TC	ins:1	0.136	0.272	mutect2,strelka	frameshift_variant	exon_1	CR44155	FBgn0265038
P7	3R	5063389	G	GA	ins:1	0.222	0.444	strelka	intergenic_region	intergenic	intergenic	intergenic
P7	3R	5066152	AC	A	del:1	0.12	0.24	strelka	intergenic_region	intergenic	intergenic	intergenic
P7	3R	5175316	T	TCG	ins:2	0.148	0.296	mutect2,strelka	frameshift_variant	exon_15	cno	FBgn0259212
P7	3R	5696803	C	CCA	ins:2	0.2	0.4	mutect2,strelka	upstream_gene_variant	intron	plx	FBgn0261261
P7	3R	5754643	GACTTT	G	del:5	0.136	0.272	mutect2	frameshift_variant	exon_1	CG2091	FBgn0037372
P7	3R	5770688	TG	T	del:1	0.154	0.308	mutect2	intron_variant	intron	CG2082	FBgn0027608
P7	3R	5807103	TC	T	del:1	0.15	0.3	strelka	frameshift_variant	exon_3	CG11000	FBgn0263353
P7	3R	5808362	T	TCG	ins:2	0.0952	0.1904	mutect2	3_prime_UTR_variant	3UTR	CG11000	FBgn0263353
P7	3R	5904987	C	CCAGCCAGCCAGCCAGCCAGCCAGG	ins:24	0.25	0.5	strelka	intron_variant	intron	CG34113	FBgn0083949
P7	3R	5946862	G	GCA	ins:2	0.111	0.222	mutect2	intron_variant	intron	CG34113	FBgn0083949
P7	3R	6149433	C	CG	ins:1	0.15	0.3	strelka	downstream_gene_variant	intergenic	intergenic	intergenic
P7	3R	6304685	T	TCA	ins:2	0.105	0.21	mutect2	upstream_gene_variant	intergenic	intergenic	intergenic
P7	3R	6453617	T	TG	ins:1	0.129	0.258	strelka	frameshift_variant	exon	CG9727	FBgn0037445
P7	3R	6789704	TA	T	del:1	0.0976	0.1952	strelka	upstream_gene_variant	intergenic	intergenic	intergenic
P7	3R	6941092	T	TG	ins:1	0.13	0.26	strelka	intron_variant	intron	Antp	FBgn0260642
P7	3R	7122797	TATA	T	del:3	0.143	0.286	strelka	upstream_gene_variant	intron	Alh	FBgn0261238
P7	3R	7313294	GT	G	del:1	0.167	0.334	strelka	upstream_gene_variant	intergenic	intergenic	intergenic
P7	3R	7441953	T	TA	ins:1	0.2	0.4	strelka	3_prime_UTR_variant	3UTR	CG14598	FBgn0037503
P7	3R	7552067	CT	C	del:1	0.1	0.2	strelka	5_prime_UTR_variant	5UTR	CG45545	FBgn0267105
P7	3R	8615916	GCA	G	del:2	0.0882	0.1764	strelka	intron_variant	intron	5-HT2B	FBgn0261929
P7	3R	8667420	GA	G	del:1	0.222	0.444	mutect2	3_prime_UTR_variant	3UTR	CG8032	FBgn0037606
P7	3R	9171648	CCA	C	del:2	0.148	0.296	strelka	intron_variant	intron	pum	FBgn0003165
P7	3R	9604700	AG	A	del:1	0.133	0.266	strelka	intron_variant	intron	CG8312	FBgn0037720
P7	3R	9659299	T	TC	ins:1	0.111	0.222	strelka	frameshift_variant	exon_23	CG9492	FBgn0037726
P7	3R	9665324	CT	C	del:1	0.129	0.258	mutect2,strelka	intron_variant	intron	CG9492	FBgn0037726
P7	3R	9910082	CT	C	del:1	0.25	0.5	strelka	intron_variant	intron	Glut4EF	FBgn0267336
P7	3R	9974258	G	GT	ins:1	0.154	0.308	strelka	intron_variant	intron	Glut4EF	FBgn0267336
P7	3R	10462031	TA	T	del:1	0.107	0.214	strelka	downstream_gene_variant	exon_1	CR44939	FBgn0266244
P7	3R	10610365	GAA	G	del:2	0.0952	0.1904	mutect2	intron_variant	intron	hth	FBgn0001235
P7	3R	10626729	GA	G	del:1	0.125	0.25	strelka	intron_variant	intron	hth	FBgn0001235
P7	3R	10648828	T	TCGAC	ins:4	0.0909	0.1818	mutect2	downstream_gene_variant	intergenic	intergenic	intergenic
P7	3R	10761733	A	AGT	ins:2	0.167	0.334	strelka	upstream_gene_variant	intron	Cap-H2	FBgn0037831
P7	3R	10770755	G	GT	ins:1	0.2	0.4	strelka	upstream_gene_variant	intron	CG45076	FBgn0266446
P7	3R	11040468	CCA	C	del:2	0.167	0.334	strelka	intron_variant	intron	CG34114	FBgn0083950
P7	3R	11119205	TAC	T	del:2	0.118	0.236	strelka	upstream_gene_variant	intergenic	intergenic	intergenic
P7	3R	11562536	AT	A	del:1	0.429	0.858	mutect2,strelka	upstream_gene_variant	intron	sea	FBgn0037912
P7	3R	11670020	AGT	A	del:2	0.118	0.236	mutect2	frameshift_variant	exon_2	CG42327	FBgn0259227
P7	3R	11947985	GC	G	del:1	0.108	0.216	strelka	upstream_gene_variant	intron	Cad87A	FBgn0037963
P7	3R	12326452	CAA	C	del:2	0.103	0.206	mutect2,strelka	upstream_gene_variant	intergenic	intergenic	intergenic
P7	3R	13235744	GT	G	del:1	0.121	0.242	strelka	intron_variant	intron	Ace	FBgn0000024
P7	3R	13247018	ATG	A	del:2	0.231	0.462	strelka	intron_variant	intron	Ace	FBgn0000024
P7	3R	13451772	T	TC	ins:1	0.12	0.24	strelka	downstream_gene_variant	intron	CG14372	FBgn0038156
P7	3R	13505812	AC	A	del:1	0.194	0.388	mutect2	intergenic_region	intergenic	intergenic	intergenic
P7	3R	13530068	G	GGGTATATGTTT	ins:11	0.389	0.778	strelka	upstream_gene_variant	intergenic	intergenic	intergenic
P7	3R	13737923	T	TC	ins:1	0.125	0.25	strelka	intron_variant	intron	CG34383	FBgn0085412
P7	3R	14268385	T	TG	ins:1	0.136	0.272	strelka	frameshift_variant	exon_6	trx	FBgn0003862
P7	3R	14398031	AT	A	del:1	0.136	0.272	strelka	upstream_gene_variant	intron	cv-c	FBgn0086901
P7	3R	14650791	CT	C	del:1	0.115	0.23	strelka	intron_variant	intron	l(3)L1231	FBgn0086686
P7	3R	16008672	CT	C	del:1	0.2	0.4	strelka	upstream_gene_variant	intergenic	intergenic	intergenic
P7	3R	16051660	GT	G	del:1	0.133	0.266	strelka	upstream_gene_variant	intron	msps	FBgn0027948
P7	3R	16318488	TG	T	del:1	0.12	0.24	strelka	upstream_gene_variant	intron	Sulf1	FBgn0040271
P7	3R	16338150	ACCG	A	del:3	0.0833	0.1666	mutect2	5_prime_UTR_variant	exon_1	Sulf1	FBgn0040271
P7	3R	17102205	CAA	C	del:2	0.111	0.222	mutect2	upstream_gene_variant	intron	cher	FBgn0014141
P7	3R	17368814	CA	C	del:1	0.125	0.25	strelka	upstream_gene_variant	intergenic	intergenic	intergenic
P7	3R	17988364	C	CCCACCACCA	ins:9	0.296	0.592	strelka	intron_variant	intron	cpo	FBgn0263995
P7	3R	18004469	A	AGACAGGGAAAG	ins:11	0.333	0.666	strelka	intron_variant	intron	cpo	FBgn0263995
P7	3R	18331121	ATG	A	del:2	0.129	0.258	strelka	3_prime_UTR_variant	3UTR	CG15803	FBgn0038606
P7	3R	18451541	AAT	A	del:2	0.125	0.25	mutect2	upstream_gene_variant	intron	fru	FBgn0004652
P7	3R	18757666	T	TG	ins:1	0.0976	0.1952	strelka	frameshift_variant	exon_3	CG14299	FBgn0038651
P7	3R	19379652	A	AT	ins:1	0.158	0.316	strelka	upstream_gene_variant	intron	Ino80	FBgn0086613
P7	3R	19409678	TG	T	del:1	0.25	0.5	strelka	frameshift_variant	exon_2	CG11626	FBgn0038705
P7	3R	19561369	A	AC	ins:1	0.286	0.572	mutect2,strelka	intron_variant	intron	Dys	FBgn0260003
P7	3R	19694930	CT	C	del:1	0.12	0.24	strelka	intron_variant	intron	Naam	FBgn0051216
P7	3R	20279039	TTA	T	del:2	0.143	0.286	strelka	intron_variant	intron	cic	FBgn0262582
P7	3R	20507931	CA	C	del:1	0.138	0.276	mutect2	upstream_gene_variant	intron	MFS9	FBgn0038799
P7	3R	20784202	GAC	G	del:2	0.16	0.32	strelka	intron_variant	intron	Syp	FBgn0038826
P7	3R	20945949	CT	C	del:1	0.167	0.334	mutect2,strelka	upstream_gene_variant	intergenic	intergenic	intergenic
P7	3R	21189743	ATCGAAAGAGATTCTCATCTGTAGAAG	A	del:26	0.188	0.376	strelka	intron_variant	intron	SNF4Agamma	FBgn0264357
P7	3R	21828049	CCCA	C	del:3	0.0909	0.1818	mutect2	upstream_gene_variant	intergenic	intergenic	intergenic
P7	3R	21974580	TTC	T	del:2	0.182	0.364	strelka	intron_variant	intron	Eip93F	FBgn0264490
P7	3R	22223952	A	AGT	ins:2	0.1	0.2	mutect2	intron_variant	intron	SKIP	FBgn0051163
P7	3R	22766667	TA	T	del:1	0.13	0.26	strelka	5_prime_UTR_variant	exon_2	CG7029	FBgn0039026
P7	3R	22806858	A	AGCCCCT	ins:6	0.158	0.316	strelka	3_prime_UTR_variant	3UTR	CG7031	FBgn0039027
P7	3R	23106215	GCA	G	del:2	0.12	0.24	strelka	intron_variant	intron	Cow	FBgn0039054
P7	3R	23494087	A	AT	ins:1	0.222	0.444	mutect2	downstream_gene_variant	intergenic	intergenic	intergenic
P7	3R	23916683	GA	G	del:1	0.292	0.584	strelka	intron_variant	intron	sba	FBgn0016754
P7	3R	23917407	C	CG	ins:1	0.12	0.24	strelka	intron_variant	intron	sba	FBgn0016754
P7	3R	24013498	CGT	C	del:2	0.154	0.308	strelka	frameshift_variant	exon_3	KrT95D	FBgn0020647
P7	3R	24454340	TTG	T	del:2	0.238	0.476	strelka	intron_variant	intron	nAChRalpha1	FBgn0000036
P7	3R	24941131	AG	A	del:1	0.167	0.334	mutect2,strelka	frameshift_variant	exon_7	ssh	FBgn0029157
P7	3R	25126046	CG	C	del:1	0.0652	0.1304	mutect2	frameshift_variant	exon_4	Mocs2	FBgn0039280
P7	3R	25228276	AGGCTTACTTTC	A	del:11	0.0741	0.1482	mutect2	downstream_gene_variant	intron	Cad96Cb	FBgn0039294
P7	3R	25251466	GA	G	del:1	0.158	0.316	mutect2	frameshift_variant	exon_2	Nup358	FBgn0039302
P7	3R	25384046	G	GT	ins:1	0.174	0.348	mutect2	frameshift_variant	exon	CG31437	FBgn0051437
P7	3R	25759421	TA	T	del:1	0.167	0.334	strelka	intron_variant	intron	LpR1	FBgn0066101
P7	3R	25842988	A	AT	ins:1	0.115	0.23	strelka	upstream_gene_variant	intergenic	intergenic	intergenic
P7	3R	25934497	G	GT	ins:1	0.138	0.276	strelka	downstream_gene_variant	intron	CCAP-R	FBgn0039396
P7	3R	26043944	AG	A	del:1	0.167	0.334	strelka	downstream_gene_variant	intron	gro	FBgn0001139
P7	3R	26391396	T	TGA	ins:2	0.2	0.4	mutect2,strelka	intergenic_region	intergenic	intergenic	intergenic
P7	3R	26458107	AT	A	del:1	0.1	0.2	mutect2	upstream_gene_variant	intergenic	intergenic	intergenic
P7	3R	27121425	GGTGA	G	del:4	0.13	0.26	mutect2,strelka	frameshift_variant	exon	CG5882	FBgn0039490
P7	3R	27790838	A	AG	ins:1	0.158	0.316	strelka	intron_variant	intron	CG34353	FBgn0085382
P7	3R	28590624	CAT	C	del:2	0.115	0.23	mutect2,strelka	upstream_gene_variant	exon_1	MRE23	FBgn0262741
P7	3R	29008690	A	AT	ins:1	0.12	0.24	strelka	downstream_gene_variant	intron	wat	FBgn0039620
P7	3R	29228348	A	AT	ins:1	0.222	0.444	strelka	upstream_gene_variant	intergenic	intergenic	intergenic
P7	3R	29564917	A	AGC	ins:2	0.0833	0.1666	mutect2	3_prime_UTR_variant	3UTR	Dr	FBgn0000492
P7	3R	29734094	AT	A	del:1	0.176	0.352	strelka	3_prime_UTR_variant	3UTR	Kul	FBgn0039688
P7	3R	30197248	TG	T	del:1	0.125	0.25	strelka	frameshift_variant	exon_4	CG9743	FBgn0039756
P7	3R	30271123	CCA	C	del:2	0.0976	0.1952	strelka	downstream_gene_variant	intergenic	intergenic	intergenic
P7	3R	30327333	AT	A	del:1	0.111	0.222	strelka	intron_variant	intron	hdc	FBgn0010113
P7	3R	30774718	C	CA	ins:1	0.182	0.364	strelka	intron_variant	intron	zfh1	FBgn0004606
P7	3R	30802067	AT	A	del:1	0.136	0.272	strelka	intron_variant	intron	wts	FBgn0011739
P7	3R	31015852	GT	G	del:1	0.148	0.296	strelka	intron_variant	intron	5-HT7	FBgn0004573
P7	3R	31052916	GC	G	del:1	0.12	0.24	strelka	frameshift_variant	exon	l(3)03670	FBgn0010808
P7	3R	31540217	CT	C	del:1	0.136	0.272	strelka	upstream_gene_variant	intergenic	intergenic	intergenic
P7	3R	31852907	TATA	T	del:3	0.148	0.296	mutect2	intron_variant	intron	heph	FBgn0011224
P7	4	271011	TC	T	del:1	0.13	0.26	strelka	intron_variant	intron	NfI	FBgn0042696
P7	4	761908	TA	T	del:1	0.2	0.4	strelka	frameshift_variant	exon_33	bt	FBgn0005666
P7	4	1178616	CA	C	del:1	0.12	0.24	strelka	intron_variant	intron	pho	FBgn0002521
P7	X	409352	C	CT	ins:1	0.308	0.308	strelka	upstream_gene_variant	intron	CG32816	FBgn0052816
P7	X	448332	CA	C	del:1	0.222	0.222	mutect2	intron_variant	intron	CG32816	FBgn0052816
P7	X	717310	AAG	A	del:2	0.231	0.231	strelka	intron_variant	intron	sdk	FBgn0021764
P7	X	912071	TG	T	del:1	0.333	0.333	strelka	upstream_gene_variant	intron	CG43867	FBgn0264449
P7	X	990188	A	AC	ins:1	0.158	0.158	strelka	upstream_gene_variant	intergenic	intergenic	intergenic
P7	X	1332067	GGGT	G	del:3	0.167	0.167	strelka	conservative_inframe_deletion	exon	CG11409	FBgn0024366
P7	X	1334905	AT	A	del:1	0.273	0.273	mutect2,strelka	intron_variant	intron	CG11409	FBgn0024366
P7	X	1355281	T	TGCA	ins:3	0.182	0.182	mutect2	conservative_inframe_insertion	exon	CG11417	FBgn0024364
P7	X	1418380	A	AT	ins:1	0.235	0.235	strelka	intron_variant	intron	futsch	FBgn0259108
P7	X	2100568	GT	G	del:1	0.3	0.3	mutect2,strelka	upstream_gene_variant	intron	csw	FBgn0000382
P7	X	2123387	ATG	A	del:2	0.333	0.333	strelka	upstream_gene_variant	intergenic	intergenic	intergenic
P7	X	2463274	CA	C	del:1	0.308	0.308	strelka	intron_variant	intron	boi	FBgn0040388
P7	X	2742696	A	AC	ins:1	0.167	0.167	strelka	frameshift_variant	intron	kirre	FBgn0028369
P7	X	3515320	GT	G	del:1	0.19	0.19	mutect2	frameshift_variant	exon	CG13021	FBgn0029669
P7	X	3621820	C	CT	ins:1	0.231	0.231	strelka	intron_variant	intron	AstA-R1	FBgn0266429
P7	X	3831158	CA	C	del:1	0.25	0.25	strelka	3_prime_UTR_variant	3UTR	CG2901	FBgn0029679
P7	X	4070849	TAAGGGGTACCATCATTA	T	del:17	0.182	0.182	strelka	intergenic_region	intergenic	intergenic	intergenic
P7	X	4186607	CAA	C	del:2	0.125	0.125	mutect2	intron_variant	intron	Fas2	FBgn0000635
P7	X	4552269	T	TATAC	ins:4	0.167	0.167	mutect2	upstream_gene_variant	intron	CG3527	FBgn0029714
P7	X	4612724	GGTGT	G	del:4	0.429	0.429	strelka	upstream_gene_variant	intergenic	intergenic	intergenic
P7	X	4877403	CGGG	C	del:3	0.231	0.231	mutect2,strelka	upstream_gene_variant	intron	CG42594	FBgn0260971
P7	X	4920340	GT	G	del:1	0.2	0.2	strelka	frameshift_variant	exon_5	CG6903	FBgn0029737
P7	X	5233302	TAC	T	del:2	0.444	0.444	strelka	intron_variant	intron	CG15465	FBgn0029746
P7	X	5859908	GT	G	del:1	0.4	0.4	mutect2	downstream_gene_variant	intergenic	intergenic	intergenic
P7	X	6133616	CGT	C	del:2	0.188	0.188	strelka	intron_variant	intron	Ca-alpha1T	FBgn0264386
P7	X	6887021	CAT	C	del:2	0.333	0.333	mutect2,strelka	intergenic_region	intergenic	intergenic	intergenic
P7	X	6924330	CA	C	del:1	0.273	0.273	strelka	intron_variant	intron	CG14431	FBgn0029922
P7	X	7056071	CA	C	del:1	0.444	0.444	strelka	intron_variant	intron	CG12541	FBgn0029930
P7	X	7170628	CA	C	del:1	0.364	0.364	strelka	intron_variant	ncRNA	CR44357	FBgn0265457
P7	X	7240122	GA	G	del:1	0.6	0.6	strelka	3_prime_UTR_variant	ncRNA	CR44357	FBgn0265457
P7	X	7360679	GA	G	del:1	0.5	0.5	mutect2,strelka	downstream_gene_variant	intron	CG1677	FBgn0029941
P7	X	7518581	G	GAC	ins:2	0.2	0.2	mutect2	intron_variant	intron	CG32719	FBgn0052719
P7	X	7557420	GA	G	del:1	0.188	0.188	strelka	non_coding_transcript_exon_variant	exon_1	CR44501	FBgn0265694
P7	X	7616593	AT	A	del:1	0.214	0.214	strelka	intron_variant	intron	ct	FBgn0004198
P7	X	8112232	AT	A	del:1	0.375	0.375	strelka	upstream_gene_variant	intron	Gclc	FBgn0040319
P7	X	8128027	CA	C	del:1	0.273	0.273	strelka	upstream_gene_variant	intron	cyr	FBgn0030001
P7	X	8307449	AG	A	del:1	0.3	0.3	mutect2,strelka	intron_variant	intron	nAChRalpha3	FBgn0015519
P7	X	8320997	CA	C	del:1	0.25	0.25	strelka	downstream_gene_variant	intron	nAChRalpha3	FBgn0015519
P7	X	8360752	A	AT	ins:1	0.267	0.267	strelka	intron_variant	intron	nAChRalpha3	FBgn0015519
P7	X	8395349	CT	C	del:1	0.4	0.4	strelka	upstream_gene_variant	intergenic	intergenic	intergenic
P7	X	8723674	CAG	C	del:2	0.2	0.2	mutect2	upstream_gene_variant	intergenic	intergenic	intergenic
P7	X	8898025	G	GT	ins:1	0.267	0.267	strelka	upstream_gene_variant	intron	Moe	FBgn0011661
P7	X	8959867	CA	C	del:1	0.333	0.333	strelka	intron_variant	intron	rdgA	FBgn0261549
P7	X	9073323	GAT	G	del:2	0.0909	0.0909	mutect2	upstream_gene_variant	intron	CG44325	FBgn0265413
P7	X	9166203	TAGC	T	del:3	0.188	0.188	strelka	5_prime_UTR_variant	exon_1	mei-P26	FBgn0026206
P7	X	9418409	CA	C	del:1	0.143	0.143	strelka	intron_variant	intron	mgl	FBgn0261260
P7	X	9542392	GAT	G	del:2	0.231	0.231	strelka	intron_variant	intron	CG32700	FBgn0267253
P7	X	9896825	G	GC	ins:1	0.286	0.286	mutect2	intron_variant	intron	CG15249	FBgn0030161
P7	X	10049062	G	GT	ins:1	0.5	0.5	strelka	upstream_gene_variant	intron	Cht6	FBgn0263132
P7	X	10628584	TG	T	del:1	0.25	0.25	mutect2,strelka	upstream_gene_variant	intron	X11Lbeta	FBgn0052677
P7	X	10679071	TCC	T	del:2	0.312	0.312	mutect2	intron_variant	intron	X11Lbeta	FBgn0052677
P7	X	10812822	TA	T	del:1	0.222	0.222	mutect2	intron_variant	intron	Imp	FBgn0262735
P7	X	11002937	C	CA	ins:1	0.278	0.278	strelka	intron_variant	intron	CG42339	FBgn0259241
P7	X	11059237	CA	C	del:1	0.231	0.231	strelka	downstream_gene_variant	intron	CG1545	FBgn0030259
P7	X	11090810	G	GT	ins:1	0.214	0.214	strelka	upstream_gene_variant	intron	CG2076	FBgn0030263
P7	X	11157785	T	TG	ins:1	0.19	0.19	strelka	frameshift_variant	exon_6	CG32668	FBgn0052668
P7	X	11276205	AT	A	del:1	0.231	0.231	strelka	intron_variant	intron	CG44422	FBgn0265595
P7	X	11449676	G	GA	ins:1	0.158	0.158	strelka	downstream_gene_variant	intron	Evi5	FBgn0262740
P7	X	11568131	G	GCA	ins:2	0.125	0.125	mutect2	frameshift_variant	exon_2	RpII215	FBgn0003277
P7	X	11617257	GCAA	G	del:3	0.4	0.4	strelka	disruptive_inframe_deletion	exon_1	Met	FBgn0002723
P7	X	11679734	TAC	T	del:2	0.231	0.231	strelka	upstream_gene_variant	intron	bif	FBgn0014133
P7	X	11731847	G	GT	ins:1	0.25	0.25	strelka	upstream_gene_variant	intron	inaF-A	FBgn0085351
P7	X	12185078	GA	G	del:1	0.5	0.5	strelka	intron_variant	intron	Ten-a	FBgn0267001
P7	X	12372316	TA	T	del:1	0.188	0.188	strelka	upstream_gene_variant	intergenic	intergenic	intergenic
P7	X	12417348	A	AT	ins:1	0.231	0.231	strelka	intergenic_region	intergenic	intergenic	intergenic
P7	X	12692911	C	CA	ins:1	0.214	0.214	strelka	frameshift_variant	exon_7	Smr	FBgn0265523
P7	X	13151988	TAC	T	del:2	0.25	0.25	mutect2	upstream_gene_variant	intron	CG32645	FBgn0052645
P7	X	13306254	GA	G	del:1	0.148	0.148	mutect2,strelka	frameshift_variant	exon_1	CR45018	FBgn0266376
P7	X	13308512	T	TA	ins:1	0.444	0.444	strelka	downstream_gene_variant	intron	IP3K2	FBgn0283680
P7	X	13371199	GCA	G	del:2	0.462	0.462	strelka	splice_region_variant	exon_1	CG1640	FBgn0030478
P7	X	13388607	CG	C	del:1	0.154	0.154	mutect2	frameshift_variant	exon	CG1662	FBgn0030481
P7	X	13388763	TC	T	del:1	0.214	0.214	strelka	3_prime_UTR_variant	3UTR	CG1662	FBgn0030481
P7	X	13674483	GT	G	del:1	0.308	0.308	strelka	3_prime_UTR_variant	3UTR	CG15760	FBgn0030508
P7	X	14907279	T	TG	ins:1	0.167	0.167	strelka	frameshift_variant	exon	CG9509	FBgn0030594
P7	X	15672180	CCT	C	del:2	0.118	0.118	mutect2	upstream_gene_variant	intergenic	intergenic	intergenic
P7	X	15750218	AT	A	del:1	0.158	0.158	strelka	frameshift_variant	exon	CG8239	FBgn0030683
P7	X	15927553	GAA	G	del:2	0.143	0.143	mutect2	frameshift_variant	3UTR	Ranbp16	FBgn0053180
P7	X	16413219	A	AT	ins:1	0.188	0.188	strelka	frameshift_variant	exon_8	CG4301	FBgn0030747
P7	X	16449404	GT	G	del:1	0.375	0.375	strelka	5_prime_UTR_variant	5UTR	Rbp2	FBgn0262734
P7	X	17345486	C	CT	ins:1	0.375	0.375	strelka	intergenic_region	intergenic	intergenic	intergenic
P7	X	17590708	TC	T	del:1	0.167	0.167	strelka	frameshift_variant	exon	CG12992	FBgn0030846
P7	X	17616793	TA	T	del:1	0.333	0.333	strelka	intergenic_region	intergenic	intergenic	intergenic
P7	X	17955993	CTG	C	del:2	0.2	0.2	mutect2	intron_variant	intron	Sh	FBgn0003380
P7	X	18091451	AG	A	del:1	0.176	0.176	strelka	upstream_gene_variant	intron	scu	FBgn0021765
P7	X	18152360	TAG	T	del:2	0.167	0.167	strelka	upstream_gene_variant	intergenic	intergenic	intergenic
P7	X	18293476	TCC	T	del:2	0.235	0.235	mutect2,strelka	downstream_gene_variant	intergenic	intergenic	intergenic
P7	X	18300228	AT	A	del:1	0.3	0.3	strelka	intergenic_region	intergenic	intergenic	intergenic
P7	X	18648237	GT	G	del:1	0.286	0.286	mutect2	5_prime_UTR_variant	5UTR	CG6540	FBgn0030943
P7	X	18793972	CT	C	del:1	0.2	0.2	strelka	downstream_gene_variant	intron	S6KL	FBgn0283473
P7	X	19237159	G	GGC	ins:2	0.222	0.222	mutect2	frameshift_variant	exon_4	CG14196	FBgn0031002
P7	X	21231452	TA	T	del:1	0.136	0.136	mutect2,strelka	upstream_gene_variant	intron	CG32521	FBgn0052521
P7	X	21426998	AT	A	del:1	0.364	0.364	strelka	downstream_gene_variant	intron	DIP-beta	FBgn0259245
P7	X	23023374	T	TCA	ins:2	0.182	0.182	mutect2	5_prime_UTR_variant	5UTR	zyd	FBgn0265767
P9	2L	2211491	GT	G	del:1	0.0714	0.1428	mutect2	frameshift_variant	exon_4	CG15385	FBgn0031397
P9	2L	4312676	ACTG	A	del:3	0.13	0.26	strelka	intron_variant	intron	tutl	FBgn0010473
P9	2L	5239494	TA	T	del:1	0.0755	0.151	mutect2	upstream_gene_variant	intron	tkv	FBgn0003716
P9	2L	5922864	ATTAGATGATT	A	del:10	0.333	0.666	strelka	upstream_gene_variant	intergenic	intergenic	intergenic
P9	2L	6146551	CA	C	del:1	0.139	0.278	strelka	downstream_gene_variant	intergenic	intergenic	intergenic
P9	2L	7619680	CT	C	del:1	0.111	0.222	mutect2	downstream_gene_variant	intergenic	intergenic	intergenic
P9	2L	8951564	A	ACT	ins:2	0.103	0.206	strelka	upstream_gene_variant	intergenic	intergenic	intergenic
P9	2L	10988093	A	AG	ins:1	0.0943	0.1886	mutect2	frameshift_variant	exon_1	CG12253	FBgn0026148
P9	2L	11079743	TTG	T	del:2	0.115	0.23	mutect2	upstream_gene_variant	intron	AstC	FBgn0032336
P9	2L	11123469	AT	A	del:1	0.0816	0.1632	strelka	frameshift_variant&start_lost	start_codon	Csl4	FBgn0032346
P9	2L	11392626	TA	T	del:1	0.0625	0.125	strelka	upstream_gene_variant	intergenic	intergenic	intergenic
P9	2L	11933771	C	CA	ins:1	0.0976	0.1952	strelka	upstream_gene_variant	intergenic	intergenic	intergenic
P9	2L	12368155	T	TTTGGCCTACTAAAATCACAAAG	ins:22	0.263	0.526	strelka	upstream_gene_variant	intron	bru2	FBgn0262475
P9	2L	12814778	CT	C	del:1	0.118	0.236	strelka	downstream_gene_variant	intergenic	intergenic	intergenic
P9	2L	13832442	TG	T	del:1	0.0714	0.1428	mutect2	frameshift_variant	exon_1	DNApol-gamma35	FBgn0004407
P9	2L	14097396	GCA	G	del:2	0.135	0.27	strelka	downstream_gene_variant	intergenic	intergenic	intergenic
P9	2L	14386259	AT	A	del:1	0.0492	0.0984	mutect2	downstream_gene_variant	intergenic	intergenic	intergenic
P9	2L	16768759	GA	G	del:1	0.0889	0.1778	strelka	frameshift_variant	exon_1	Mhc	FBgn0264695
P9	2L	17070393	G	GT	ins:1	0.135	0.27	strelka	intergenic_region	intergenic	intergenic	intergenic
P9	2L	17270686	TCA	T	del:2	0.0833	0.1666	strelka	intergenic_region	intergenic	intergenic	intergenic
P9	2L	17297629	GT	G	del:1	0.333	0.666	strelka	intergenic_region	intergenic	intergenic	intergenic
P9	2L	17741506	CA	C	del:1	0.103	0.206	strelka	intron_variant	intron	CadN	FBgn0015609
P9	2L	17786020	GC	G	del:1	0.0755	0.151	strelka	downstream_gene_variant	intergenic	intergenic	intergenic
P9	2L	17790549	CGGAATAGTGAAAACAAA	C	del:17	0.321	0.642	strelka	upstream_gene_variant	intron	CadN2	FBgn0262018
P9	2L	18968164	TC	T	del:1	0.0597	0.1194	mutect2,strelka	upstream_gene_variant	intron	Nak	FBgn0015772
P9	2L	19537344	TA	T	del:1	0.167	0.334	strelka	3_prime_UTR_variant	3UTR	CG33116	FBgn0053116
P9	2L	21286406	CT	C	del:1	0.138	0.276	strelka	frameshift_variant	exon	Mondo	FBgn0032940
P9	2L	21291184	TG	T	del:1	0.0645	0.129	strelka	frameshift_variant	exon_1	Gr39a	FBgn0264556
P9	2L	21814086	GA	G	del:1	0.143	0.286	strelka	intergenic_region	intergenic	intergenic	intergenic
P9	2L	21951727	CT	C	del:1	0.08	0.16	strelka	upstream_gene_variant	intergenic	intergenic	intergenic
P9	2R	5086565	TATTG	T	del:4	0.1	0.2	strelka	upstream_gene_variant	intergenic	intergenic	intergenic
P9	2R	6564722	C	CT	ins:1	0.0588	0.1176	mutect2	intron_variant	intron	jing	FBgn0086655
P9	2R	8090115	CT	C	del:1	0.0909	0.1818	mutect2	frameshift_variant	exon_2	sut3	FBgn0028561
P9	2R	9076204	T	TAAAAATGA	ins:8	0.167	0.334	strelka	upstream_gene_variant	intron	ana	FBgn0011746
P9	2R	9736612	A	AT	ins:1	0.1	0.2	strelka	intron_variant	intron	sqa	FBgn0259678
P9	2R	10349405	CT	C	del:1	0.0667	0.1334	mutect2	upstream_gene_variant	intron	CG42732	FBgn0261698
P9	2R	10354406	GTTGGTCAATCAGACT	G	del:15	0.207	0.414	strelka	upstream_gene_variant	intron	CG42732	FBgn0261698
P9	2R	10670376	G	GCCCCC	ins:5	0.179	0.358	mutect2	upstream_gene_variant	intergenic	intergenic	intergenic
P9	2R	10670376	G	GCCCCCC	ins:6	0.179	0.358	mutect2	upstream_gene_variant	intergenic	intergenic	intergenic
P9	2R	11313330	ATT	A	del:2	0.0278	0.0556	mutect2	downstream_gene_variant	intron	nompA	FBgn0016047
P9	2R	17075756	AGCT	A	del:3	0.0645	0.129	strelka	disruptive_inframe_deletion	exon_1	CG30460	FBgn0050460
P9	2R	17132493	AC	A	del:1	0.0833	0.1666	mutect2	upstream_gene_variant	intergenic	intergenic	intergenic
P9	2R	17483449	A	ATT	ins:2	0.039	0.078	mutect2	upstream_gene_variant	intron	CG43110	FBgn0262570
P9	2R	17971148	ATGTGTATCCCAT	A	del:12	0.188	0.376	strelka	downstream_gene_variant	intergenic	intergenic	intergenic
P9	2R	18123444	T	TA	ins:1	0.0952	0.1904	strelka	upstream_gene_variant	intron	stau	FBgn0003520
P9	2R	19810330	CAAG	C	del:3	0.0794	0.1588	strelka	intergenic_region	intergenic	intergenic	intergenic
P9	2R	22323810	TA	T	del:1	0.0625	0.125	strelka	upstream_gene_variant	intron	Gp150	FBgn0013272
P9	2R	23178063	GTGT	G	del:3	0.0784	0.1568	strelka	intron_variant	intron	CG34371	FBgn0085400
P9	2R	23479816	TG	T	del:1	0.106	0.212	mutect2	upstream_gene_variant	intron	CG43795	FBgn0264339
P9	2R	25162759	CGCTGGT	C	del:6	0.429	0.858	mutect2,strelka	upstream_gene_variant	intergenic	intergenic	intergenic
P9	3L	842990	ACC	A	del:2	0.2	0.4	strelka	upstream_gene_variant	intron	Gr61a	FBgn0035167
P9	3L	1321285	C	CT	ins:1	0.106	0.212	strelka	upstream_gene_variant	intron	Myo61F	FBgn0010246
P9	3L	2873084	G	GT	ins:1	0.14	0.28	strelka	intron_variant	intron	Tet	FBgn0263392
P9	3L	3946559	A	AAAAAAGATTATTATAC	ins:16	0.19	0.38	strelka	3_prime_UTR_variant	3UTR	CG14982	FBgn0035477
P9	3L	4289195	CTA	C	del:2	0.0513	0.1026	mutect2	upstream_gene_variant	intron	Hexo1	FBgn0041630
P9	3L	4300080	A	AT	ins:1	0.32	0.64	strelka	upstream_gene_variant	intron	dyl	FBgn0066365
P9	3L	4300108	AAGCCCATTGAG	A	del:11	0.143	0.286	strelka	upstream_gene_variant	intron	dyl	FBgn0066365
P9	3L	4483098	TC	T	del:1	0.0625	0.125	mutect2	frameshift_variant	exon	CG11350	FBgn0035552
P9	3L	5656993	T	TC	ins:1	0.0702	0.1404	strelka	upstream_gene_variant	intron	lin-28	FBgn0035626
P9	3L	5804899	CA	C	del:1	0.0725	0.145	mutect2	frameshift_variant	exon_2	CG42272	FBgn0259167
P9	3L	6131960	TTA	T	del:2	0.0652	0.1304	mutect2	frameshift_variant	exon_1	Cpr65Au	FBgn0042119
P9	3L	6727629	G	GT	ins:1	0.098	0.196	mutect2	upstream_gene_variant	intergenic	intergenic	intergenic
P9	3L	6899515	A	AC	ins:1	0	0	consensus	intergenic_region	intergenic	intergenic	intergenic
P9	3L	7826757	C	CGTTGCTGCTGCTGCTGCTGCTACT	ins:24	0.114	0.228	strelka	5_prime_UTR_variant	5UTR	Pdp1	FBgn0016694
P9	3L	8167831	CA	C	del:1	0.104	0.208	strelka	upstream_gene_variant	intergenic	intergenic	intergenic
P9	3L	8181990	GA	G	del:1	0.0794	0.1588	strelka	upstream_gene_variant	intron	CG7979	FBgn0035848
P9	3L	8708284	CA	C	del:1	0.103	0.206	mutect2	intergenic_region	intergenic	intergenic	intergenic
P9	3L	8805389	TC	T	del:1	0.0612	0.1224	mutect2	frameshift_variant	exon_3	CG34427	FBgn0085456
P9	3L	9910871	CT	C	del:1	0.182	0.364	strelka	intron_variant	intron	CG34356	FBgn0085385
P9	3L	10629476	T	TATAA	ins:4	0.25	0.5	strelka	upstream_gene_variant	intron	CG42536	FBgn0260644
P9	3L	10629480	TGTCTA	T	del:5	0.237	0.474	strelka	upstream_gene_variant	intron	CG42536	FBgn0260644
P9	3L	12863073	AT	A	del:1	0.093	0.186	strelka	upstream_gene_variant	intergenic	intergenic	intergenic
P9	3L	13051649	C	CT	ins:1	0.0698	0.1396	mutect2	downstream_gene_variant	intergenic	intergenic	intergenic
P9	3L	13222781	T	TG	ins:1	0.222	0.444	strelka	upstream_gene_variant	intergenic	intergenic	intergenic
P9	3L	13503116	ACAG	A	del:3	0.143	0.286	strelka	5_prime_UTR_variant	5UTR	Spt20	FBgn0036374
P9	3L	17289729	G	GGGGGGGA	ins:7	0.161	0.322	strelka	intergenic_region	intergenic	intergenic	intergenic
P9	3L	19190881	C	CA	ins:1	0.0943	0.1886	strelka	intron_variant	intron	fz2	FBgn0016797
P9	3L	20400335	AT	A	del:1	0.0909	0.1818	mutect2,strelka	upstream_gene_variant	intron	trbl	FBgn0028978
P9	3L	22156479	C	CT	ins:1	0.13	0.26	strelka	intron_variant	intron	olf413	FBgn0037153
P9	3L	24157998	C	CA	ins:1	0.152	0.304	strelka	intron_variant	intron	Snap25	FBgn0011288
P9	3L	24169218	C	CA	ins:1	0.148	0.296	strelka	intron_variant	intron	Snap25	FBgn0011288
P9	3R	1612753	CT	C	del:1	0.22	0.44	strelka	intron_variant	intron	Myo81F	FBgn0267431
P9	3R	2613614	G	GA	ins:1	0.125	0.25	strelka	intron_variant	intron	Pzl	FBgn0267430
P9	3R	4935316	CCT	C	del:2	0.0727	0.1454	mutect2	frameshift_variant	exon	Cdep	FBgn0265082
P9	3R	7634835	C	CA	ins:1	0.214	0.428	strelka	intron_variant	intron	Nlg3	FBgn0083963
P9	3R	8454842	C	CA	ins:1	0.0845	0.169	strelka	intron_variant	intron	CG45263	FBgn0266801
P9	3R	10096687	CA	C	del:1	0.162	0.324	strelka	upstream_gene_variant	exon_1	CR43459	FBgn0263413
P9	3R	12724981	A	AT	ins:1	0.0755	0.151	strelka	upstream_gene_variant	intergenic	intergenic	intergenic
P9	3R	12954772	T	TCA	ins:2	0.0714	0.1428	mutect2	intron_variant	intron	grsm	FBgn0040493
P9	3R	13115946	CTG	C	del:2	0.125	0.25	strelka	intron_variant	intron	timeout	FBgn0038118
P9	3R	13210827	TTA	T	del:2	0.0667	0.1334	strelka	intron_variant	intron	CG8483	FBgn0038126
P9	3R	13946285	C	CCT	ins:2	0.12	0.24	mutect2	upstream_gene_variant	intergenic	intergenic	intergenic
P9	3R	14046588	T	TGGCATAC	ins:7	0.3	0.6	strelka	upstream_gene_variant	intergenic	intergenic	intergenic
P9	3R	15197714	TA	T	del:1	0.114	0.228	strelka	upstream_gene_variant	intron	CG42542	FBgn0260659
P9	3R	16012279	CG	C	del:1	0.0508	0.1016	mutect2	5_prime_UTR_variant	5UTR	GATAe	FBgn0038391
P9	3R	16225436	A	ATAT	ins:3	0.229	0.458	strelka	upstream_gene_variant	intergenic	intergenic	intergenic
P9	3R	16267242	T	TGA	ins:2	0.0517	0.1034	mutect2	frameshift_variant	exon_2	Mst89B	FBgn0020399
P9	3R	17659435	C	CTT	ins:2	0.0526	0.1052	mutect2	upstream_gene_variant	intron	CG14322	FBgn0038532
P9	3R	18174892	A	AC	ins:1	0.0612	0.1224	mutect2	frameshift_variant	exon_3	PP2A-B'	FBgn0042693
P9	3R	18462633	CT	C	del:1	0.0781	0.1562	strelka	intron_variant	intron	fru	FBgn0004652
P9	3R	19030628	AG	A	del:1	0.0746	0.1492	mutect2	frameshift_variant	exon	Prp18	FBgn0027784
P9	3R	21600519	GT	G	del:1	0.0408	0.0816	mutect2	intron_variant	intron	InR	FBgn0283499
P9	3R	21702198	CA	C	del:1	0.207	0.414	strelka	intron_variant	intron	CG31176	FBgn0051176
P9	3R	21776567	GT	G	del:1	0.0784	0.1568	strelka	frameshift_variant	exon_2	CG6800	FBgn0038902
P9	3R	24377961	GT	G	del:1	0.235	0.47	strelka	upstream_gene_variant	intergenic	intergenic	intergenic
P9	3R	24531390	GT	G	del:1	0.0625	0.125	mutect2	frameshift_variant	exon_2	ana1	FBgn0262167
P9	3R	24923006	AG	A	del:1	0.0556	0.1112	mutect2	frameshift_variant	exon_2	Mink	FBgn0039250
P9	3R	25952205	GA	G	del:1	0.0811	0.1622	mutect2	intron_variant	intron	CCAP-R	FBgn0039396
P9	3R	26004553	C	CA	ins:1	0.179	0.358	strelka	downstream_gene_variant	exon_1	CR45038	FBgn0266398
P9	3R	26229630	CCT	C	del:2	0.0667	0.1334	strelka	upstream_gene_variant	ncRNA	CR44320	FBgn0265379
P9	3R	28173529	AC	A	del:1	0.143	0.286	strelka	intron_variant	intron	CG34354	FBgn0085383
P9	3R	30740124	GGGTGGC	G	del:6	0.188	0.376	strelka	upstream_gene_variant	intergenic	intergenic	intergenic
P9	3R	30993085	TA	T	del:1	0.105	0.21	mutect2	upstream_gene_variant	exon_1	CR46117	FBgn0267786
P9	3R	31055188	GT	G	del:1	0.148	0.296	strelka	3_prime_UTR_variant	3UTR	dco	FBgn0002413
P9	3R	31376663	C	CA	ins:1	0.114	0.228	strelka	downstream_gene_variant	intergenic	intergenic	intergenic
P9	3R	31823827	A	ACC	ins:2	0.0556	0.1112	mutect2	upstream_gene_variant	intron	RhoGAP100F	FBgn0039883
P9	3R	31973189	CA	C	del:1	0.114	0.228	strelka	upstream_gene_variant	intron	heph	FBgn0011224
P9	4	1081141	G	GT	ins:1	0.277	0.554	mutect2,strelka	frameshift_variant	exon_3	Actbeta	FBgn0024913
P9	X	511555	TA	T	del:1	0.107	0.107	strelka	3_prime_UTR_variant	intron	arg	FBgn0023535
P9	X	663937	TA	T	del:1	0.12	0.12	strelka	intergenic_region	intergenic	intergenic	intergenic
P9	X	677327	GT	G	del:1	0.217	0.217	strelka	intergenic_region	intergenic	intergenic	intergenic
P9	X	1018454	GT	G	del:1	0.148	0.148	strelka	downstream_gene_variant	intron	CG11638	FBgn0040351
P9	X	1212710	AAG	A	del:2	0.0667	0.0667	mutect2	3_prime_UTR_variant	3UTR	CG11398	FBgn0040366
P9	X	1387567	ATG	A	del:2	0.0909	0.0909	mutect2	upstream_gene_variant	intron	CG32813	FBgn0052813
P9	X	1651704	ACTGAGTACTGAGTACTGAGTC	A	del:21	0	0	consensus	upstream_gene_variant	3UTR	br	FBgn0283451
P9	X	2010455	CA	C	del:1	0.12	0.12	strelka	upstream_gene_variant	intergenic	intergenic	intergenic
P9	X	2249562	AT	A	del:1	0.111	0.111	strelka	frameshift_variant	exon	crn	FBgn0000377
P9	X	2592025	GCA	G	del:2	0.158	0.158	strelka	upstream_gene_variant	intron	egh	FBgn0001404
P9	X	2596577	AG	A	del:1	0.075	0.075	mutect2	frameshift_variant	exon_2	egh	FBgn0001404
P9	X	2766098	TA	T	del:1	0.208	0.208	strelka	intron_variant	intron	kirre	FBgn0028369
P9	X	3193678	TG	T	del:1	0.15	0.15	strelka	intron_variant	intron	dnc	FBgn0000479
P9	X	3552932	T	TTTTA	ins:4	0.222	0.222	strelka	upstream_gene_variant	intron	DIP-alpha	FBgn0052791
P9	X	3845252	GT	G	del:1	0.129	0.129	strelka	upstream_gene_variant	intron	ec	FBgn0000542
P9	X	4435144	CA	C	del:1	0.2	0.2	strelka	intron_variant	intron	bi	FBgn0000179
P9	X	4796840	AAC	A	del:2	0.13	0.13	strelka	downstream_gene_variant	intergenic	intergenic	intergenic
P9	X	5121891	TAC	T	del:2	0.2	0.2	strelka	intron_variant	intron	CG15465	FBgn0029746
P9	X	5172173	GA	G	del:1	0.115	0.115	mutect2	intron_variant	intron	CG15465	FBgn0029746
P9	X	5245213	TCA	T	del:2	0.154	0.154	strelka	intron_variant	intron	CG15465	FBgn0029746
P9	X	5796094	AAC	A	del:2	0.15	0.15	strelka	upstream_gene_variant	intergenic	intergenic	intergenic
P9	X	6368096	TC	T	del:1	0.103	0.103	mutect2,strelka	upstream_gene_variant	intron	Marf	FBgn0029870
P9	X	6638825	GGA	G	del:2	0.0952	0.0952	mutect2	downstream_gene_variant	intron	pigs	FBgn0029881
P9	X	6738804	C	CG	ins:1	0.13	0.13	strelka	downstream_gene_variant	intron	CG3168	FBgn0029896
P9	X	6803304	GAGT	G	del:3	0.08	0.08	mutect2	5_prime_UTR_variant	5UTR	C3G	FBgn0259228
P9	X	7089726	CA	C	del:1	0.156	0.156	strelka	upstream_gene_variant	intron	Sxl	FBgn0264270
P9	X	7123437	CT	C	del:1	0.208	0.208	strelka	upstream_gene_variant	intergenic	intergenic	intergenic
P9	X	7617391	CT	C	del:1	0.207	0.207	strelka	intron_variant	intron	ct	FBgn0004198
P9	X	7763870	CTT	C	del:2	0.125	0.125	mutect2	upstream_gene_variant	intergenic	intergenic	intergenic
P9	X	8050914	GT	G	del:1	0.259	0.259	strelka	intron_variant	intron	fs(1)h	FBgn0004656
P9	X	8360868	GCA	G	del:2	0.235	0.235	strelka	intron_variant	intron	nAChRalpha3	FBgn0015519
P9	X	8610940	CT	C	del:1	0.167	0.167	strelka	upstream_gene_variant	intergenic	intergenic	intergenic
P9	X	8974319	GCT	G	del:2	0.158	0.158	strelka	upstream_gene_variant	ncRNA	CR43836	FBgn0264384
P9	X	9498507	C	CG	ins:1	0.143	0.143	strelka	upstream_gene_variant	intron	mgl	FBgn0261260
P9	X	11464036	CA	C	del:1	0.147	0.147	strelka	downstream_gene_variant	intron	CG43155	FBgn0262685
P9	X	11818061	C	CA	ins:1	0.148	0.148	strelka	upstream_gene_variant	intron	rudhira	FBgn0266019
P9	X	11882490	ATG	A	del:2	0.158	0.158	strelka	upstream_gene_variant	intron	CG10353	FBgn0030349
P9	X	12151359	A	AT	ins:1	0.174	0.174	strelka	intron_variant	intron	Ten-a	FBgn0267001
P9	X	12842007	AAC	A	del:2	0.1	0.1	strelka	intron_variant	intron	Pde9	FBgn0259171
P9	X	13068014	ATAT	A	del:3	0.13	0.13	mutect2	intron_variant	intron	rad	FBgn0265597
P9	X	13407625	GC	G	del:1	0.148	0.148	strelka	upstream_gene_variant	intron	GstT4	FBgn0030484
P9	X	13739136	TA	T	del:1	0.115	0.115	strelka	3_prime_UTR_variant	3UTR	CG11134	FBgn0030518
P9	X	14480635	T	TCC	ins:2	0.114	0.114	strelka	upstream_gene_variant	intergenic	intergenic	intergenic
P9	X	15127670	CA	C	del:1	0.235	0.235	strelka	intron_variant	intron	drd	FBgn0260006
P9	X	15276446	T	TAC	ins:2	0.167	0.167	strelka	upstream_gene_variant	intergenic	intergenic	intergenic
P9	X	15421177	C	CT	ins:1	0.267	0.267	strelka	5_prime_UTR_variant	5UTR	Cngl	FBgn0263257
P9	X	15892741	AT	A	del:1	0.182	0.182	strelka	upstream_gene_variant	intron	shi	FBgn0003392
P9	X	16171042	GT	G	del:1	0.115	0.115	strelka	intergenic_region	intergenic	intergenic	intergenic
P9	X	16231511	CTG	C	del:2	0.158	0.158	strelka	intergenic_region	intergenic	intergenic	intergenic
P9	X	16769277	TA	T	del:1	0.25	0.25	strelka	intron_variant	intron	if	FBgn0001250
P9	X	16820068	GTT	G	del:2	0.0769	0.0769	mutect2	upstream_gene_variant	intron	CG4829	FBgn0030796
P9	X	17926000	GT	G	del:1	0.167	0.167	strelka	3_prime_UTR_variant	exon_13	Sh	FBgn0003380
P9	X	18132272	CTG	C	del:2	0.125	0.125	strelka	3_prime_UTR_variant	3UTR	ari-1	FBgn0017418
P9	X	18439935	AC	A	del:1	0.154	0.154	strelka	frameshift_variant	exon	CG43841	FBgn0264393
P9	X	18667871	CATT	C	del:3	0.0952	0.0952	mutect2	downstream_gene_variant	intergenic	intergenic	intergenic
P9	X	18917462	GCA	G	del:2	0.118	0.118	strelka	downstream_gene_variant	intergenic	intergenic	intergenic
P9	X	19246147	CG	C	del:1	0.12	0.12	strelka	frameshift_variant	exon	CG7992	FBgn0031004
P9	X	20509162	C	CA	ins:1	0.182	0.182	strelka	upstream_gene_variant	intron	RhoGAP19D	FBgn0031118
P9	X	20687765	CA	C	del:1	0.143	0.143	strelka	upstream_gene_variant	intergenic	intergenic	intergenic
P9	X	21260281	CA	C	del:1	0.214	0.214	strelka	intron_variant	intron	CG32521	FBgn0052521
P9	X	21948459	G	GCCAA	ins:4	0.308	0.308	strelka	intergenic_region	intergenic	intergenic	intergenic
P9	X	23263827	CA	C	del:1	0.2	0.2	strelka	upstream_gene_variant	intergenic	intergenic	intergenic
P9	Y	543680	G	GA	ins:1	0.167	0.167	strelka	intron_variant	intron	kl-3	FBgn0267432
P9	Y	594356	CGCG	C	del:3	0.29	0.29	strelka	intron_variant	intron	kl-2	FBgn0001313
P9	Y	739084	CA	C	del:1	0.167	0.167	strelka	intergenic_region	intergenic	intergenic	intergenic
P11	2L	1615434	CAGTAACCACTTGTTATGTTCCAATATTTG	C	del:29	0.148	0.296	strelka	upstream_gene_variant	intergenic	intergenic	intergenic
P11	2L	2084190	G	GA	ins:1	0.0769	0.1538	strelka	downstream_gene_variant	exon_1	CR44055	FBgn0264864
P11	2L	2652281	GT	G	del:1	0.0492	0.0984	mutect2	frameshift_variant	exon_1	CG33125	FBgn0053125
P11	2L	5362422	A	AC	ins:1	0.146	0.292	strelka	intron_variant	intron	nompC	FBgn0016920
P11	2L	5546019	CA	C	del:1	0.125	0.25	strelka	3_prime_UTR_variant	3UTR	Lam	FBgn0002525
P11	2L	6243408	TG	T	del:1	0.0417	0.0834	mutect2	intergenic_region	intergenic	intergenic	intergenic
P11	2L	6313195	AAGT	A	del:3	0.298	0.596	strelka	upstream_gene_variant	intron	Ddr	FBgn0053531
P11	2L	6313201	A	ACGCTG	ins:5	0.326	0.652	strelka	upstream_gene_variant	intron	Ddr	FBgn0053531
P11	2L	7033368	A	ATG	ins:2	0.227	0.454	mutect2	upstream_gene_variant	intron	Caper	FBgn0031883
P11	2L	7033368	A	ATGT	ins:3	0.227	0.454	mutect2	upstream_gene_variant	intron	Caper	FBgn0031883
P11	2L	9401487	GGGTA	G	del:4	0.267	0.534	strelka	upstream_gene_variant	intron	Shawl	FBgn0085395
P11	2L	10799449	CA	C	del:1	0.0877	0.1754	strelka	downstream_gene_variant	intron	CG31869	FBgn0051869
P11	2L	12142853	TGTGTGA	T	del:6	0.0645	0.129	mutect2	splice_donor_variant&splice_region_variant&5_prime_UTR_variant&intron_variant	exon_1	CG31760	FBgn0051760
P11	2L	12225510	TTTGA	T	del:4	0.19	0.38	strelka	intron_variant	intron	bru1	FBgn0000114
P11	2L	12861355	CT	C	del:1	0.0602	0.1204	strelka	intergenic_region	intergenic	intergenic	intergenic
P11	2L	18047424	TA	T	del:1	0.0577	0.1154	mutect2	intron_variant	intron	rdo	FBgn0243486
P11	2L	18594838	TA	T	del:1	0.0714	0.1428	mutect2	3_prime_UTR_variant	3UTR	CG15160	FBgn0032688
P11	2R	1334631	CA	C	del:1	0.0685	0.137	strelka	intergenic_region	intergenic	intergenic	intergenic
P11	2R	3079121	TTA	T	del:2	0.227	0.454	strelka	intron_variant	intron	dpr21	FBgn0260995
P11	2R	9015249	ATTTTT	A	del:5	0.143	0.286	strelka	upstream_gene_variant	intron	CG13744	FBgn0033363
P11	2R	9086670	GT	G	del:1	0.0645	0.129	strelka	frameshift_variant	exon_5	CG13742	FBgn0033372
P11	2R	10401651	C	CA	ins:1	0.0909	0.1818	strelka	intron_variant	intron	CG42732	FBgn0261698
P11	2R	10727308	AG	A	del:1	0.0816	0.1632	strelka	upstream_gene_variant	intron	Rab3	FBgn0005586
P11	2R	10749869	GT	G	del:1	0.292	0.584	strelka	intron_variant	intron	CG33144	FBgn0053144
P11	2R	12923424	CT	C	del:1	0.0656	0.1312	strelka	3_prime_UTR_variant	3UTR	NAT1	FBgn0010488
P11	2R	13370511	TCC	T	del:2	0.156	0.312	strelka	intergenic_region	intergenic	intergenic	intergenic
P11	2R	13753639	G	GTTTTTTTT	ins:8	0.118	0.236	mutect2	upstream_gene_variant	intergenic	intergenic	intergenic
P11	2R	14923677	T	TTTG	ins:3	0.143	0.286	mutect2	intron_variant	intron	Kank	FBgn0027596
P11	2R	15605863	C	CGGGGGACTTGG	ins:11	0.19	0.38	strelka	intergenic_region	intergenic	intergenic	intergenic
P11	2R	17329123	CTA	C	del:2	0.0517	0.1034	mutect2	intron_variant	intron	mbl	FBgn0265487
P11	2R	18889125	GA	G	del:1	0.0889	0.1778	strelka	intron_variant	intron	sano	FBgn0034408
P11	2R	20639783	CG	C	del:1	0.114	0.228	strelka	frameshift_variant	exon_1	rig	FBgn0250850
P11	2R	21469369	ACT	A	del:2	0.0492	0.0984	mutect2	intron_variant	intron	Sdc	FBgn0010415
P11	2R	24117744	GT	G	del:1	0.139	0.278	strelka	upstream_gene_variant	intron	CG3257	FBgn0034978
P11	3L	236526	AT	A	del:1	0.0571	0.1142	strelka	upstream_gene_variant	intron	E(bx)	FBgn0000541
P11	3L	976046	GAAC	G	del:3	0.0533	0.1066	strelka	intron_variant	intron	Glut1	FBgn0264574
P11	3L	4348535	CT	C	del:1	0.118	0.236	strelka	upstream_gene_variant	intron	Cip4	FBgn0035533
P11	3L	9723392	TA	T	del:1	0.0769	0.1538	mutect2	upstream_gene_variant	intergenic	intergenic	intergenic
P11	3L	9881926	CA	C	del:1	0.222	0.444	strelka	downstream_gene_variant	intron	CG34382	FBgn0085411
P11	3L	10612470	A	ATATATAT	ins:7	0.278	0.556	strelka	intergenic_region	intergenic	intergenic	intergenic
P11	3L	11838027	AG	A	del:1	0	0	consensus	upstream_gene_variant	intergenic	intergenic	intergenic
P11	3L	12689060	GA	G	del:1	0.093	0.186	mutect2,strelka	upstream_gene_variant	intergenic	intergenic	intergenic
P11	3L	13495017	CA	C	del:1	0.0769	0.1538	mutect2	upstream_gene_variant	intron	Tgi	FBgn0036373
P11	3L	22187659	ACG	A	del:2	0.0682	0.1364	mutect2	intron_variant	intron	olf413	FBgn0037153
P11	3L	22972016	CT	C	del:1	0.182	0.364	strelka	intergenic_region	intergenic	intergenic	intergenic
P11	3L	26643475	GT	G	del:1	0.108	0.216	strelka	intergenic_region	intergenic	intergenic	intergenic
P11	3R	7491863	TA	T	del:1	0.1	0.2	mutect2	upstream_gene_variant	intron	alpha-Est10	FBgn0015569
P11	3R	11303804	CGT	C	del:2	0.143	0.286	strelka	intron_variant	ncRNA	CR31386	FBgn0051386
P11	3R	17486537	TG	T	del:1	0.05	0.1	mutect2	intron_variant	intron	Dscam3	FBgn0261046
P11	3R	17631026	GA	G	del:1	0.128	0.256	strelka	upstream_gene_variant	intron	CG43175	FBgn0262794
P11	3R	18141918	TC	T	del:1	0.0833	0.1666	mutect2	intergenic_region	intergenic	intergenic	intergenic
P11	3R	22549238	AT	A	del:1	0.0678	0.1356	strelka	upstream_gene_variant	intergenic	intergenic	intergenic
P11	3R	22595795	GA	G	del:1	0.093	0.186	mutect2	intron_variant	intron	Efa6	FBgn0051158
P11	3R	23325807	C	CA	ins:1	0.0806	0.1612	strelka	intron_variant	intron	pnt	FBgn0003118
P11	3R	25720808	TTGACAAA	T	del:7	0.276	0.552	strelka	upstream_gene_variant	intron	LpR2	FBgn0051092
P11	3R	25939840	GCA	G	del:2	0.102	0.204	strelka	intron_variant	intron	CCAP-R	FBgn0039396
P11	3R	26462866	G	GC	ins:1	0.261	0.522	strelka	upstream_gene_variant	intron	CG5455	FBgn0039430
P11	3R	26726677	AT	A	del:1	0.231	0.462	strelka	3_prime_UTR_variant	3UTR	CG14244	FBgn0040607
P11	3R	26726680	A	ACACTT	ins:5	0.231	0.462	strelka	splice_region_variant	3UTR	CG14244	FBgn0040607
P11	3R	30809075	A	AAAAAAC	ins:6	0.208	0.416	strelka	5_prime_UTR_variant	5UTR	cindr	FBgn0027598
P11	4	548554	GA	G	del:1	0.0833	0.1666	strelka	intron_variant	intron	Thd1	FBgn0026869
P11	X	256252	GA	G	del:1	0.13	0.13	strelka	frameshift_variant	exon_2	cin	FBgn0000316
P11	X	1278763	GT	G	del:1	0.156	0.156	strelka	upstream_gene_variant	intergenic	intergenic	intergenic
P11	X	1590567	CTG	C	del:2	0.2	0.2	strelka	intron_variant	intron	br	FBgn0283451
P11	X	2662631	ATATG	A	del:4	0.133	0.133	mutect2	intron_variant	intron	sgg	FBgn0003371
P11	X	2762410	GCTA	G	del:3	0.118	0.118	mutect2	intron_variant	intron	kirre	FBgn0028369
P11	X	3308261	GCA	G	del:2	0.188	0.188	strelka	intron_variant	intron	dnc	FBgn0000479
P11	X	3537640	CCA	C	del:2	0.176	0.176	strelka	intron_variant	intron	DIP-alpha	FBgn0052791
P11	X	3778771	TTC	T	del:2	0.179	0.179	strelka	upstream_gene_variant	intron	Tlk	FBgn0283657
P11	X	4897692	GA	G	del:1	0.125	0.125	strelka	intron_variant	intron	CG42594	FBgn0260971
P11	X	6625563	TTC	T	del:2	0	0	consensus	intron_variant	intron	pigs	FBgn0029881
P11	X	7124853	ATG	A	del:2	0.2	0.2	strelka	upstream_gene_variant	intergenic	intergenic	intergenic
P11	X	7224606	TTG	T	del:2	0.185	0.185	mutect2	upstream_gene_variant	ncRNA	CR44357	FBgn0265457
P11	X	7234776	CTT	C	del:2	0.143	0.143	mutect2,strelka	intron_variant	ncRNA	CR44357	FBgn0265457
P11	X	8006352	CA	C	del:1	0.12	0.12	mutect2,strelka	intron_variant	intron	Tbh	FBgn0010329
P11	X	8227114	GCA	G	del:2	0.147	0.147	strelka	upstream_gene_variant	intron	sdt	FBgn0261873
P11	X	8480362	GT	G	del:1	0.308	0.308	strelka	3_prime_UTR_variant	3UTR	Cp36	FBgn0000359
P11	X	9012768	CA	C	del:1	0.222	0.222	strelka	intron_variant	ncRNA	CR43836	FBgn0264384
P11	X	9785628	CAG	C	del:2	0.167	0.167	mutect2	upstream_gene_variant	intron	CG32698	FBgn0052698
P11	X	9815526	TTG	T	del:2	0.192	0.192	strelka	intron_variant	intron	CG32698	FBgn0052698
P11	X	10767677	CT	C	del:1	0.115	0.115	strelka	upstream_gene_variant	intron	Atg8a	FBgn0052672
P11	X	10818827	CCAGCAG	C	del:6	0.158	0.158	strelka	upstream_gene_variant	intron	Imp	FBgn0262735
P11	X	10824527	CCA	C	del:2	0.241	0.241	strelka	upstream_gene_variant	exon_1	CR45624	FBgn0267184
P11	X	13236699	AAC	A	del:2	0.167	0.167	mutect2	upstream_gene_variant	intron	mew	FBgn0004456
P11	X	13322215	CT	C	del:1	0.174	0.174	strelka	intron_variant	intron	IP3K2	FBgn0283680
P11	X	13927685	GCT	G	del:2	0.174	0.174	strelka	intron_variant	intron	mamo	FBgn0267033
P11	X	14818032	GGAT	G	del:3	0.174	0.174	strelka	intron_variant	intron	rut	FBgn0003301
P11	X	15582723	AAGC	A	del:3	0.105	0.105	mutect2	conservative_inframe_deletion	exon	CG9215	FBgn0030659
P11	X	15883237	ATGC	A	del:3	0.107	0.107	strelka	disruptive_inframe_deletion	exon_4	tay	FBgn0260938
P11	X	16815842	AT	A	del:1	0.308	0.308	strelka	upstream_gene_variant	exon_1	CR44129	FBgn0264960
P11	X	16838599	CTA	C	del:2	0.167	0.167	strelka	3_prime_UTR_variant	3UTR	RSG7	FBgn0024941
P11	X	16844200	GCA	G	del:2	0.13	0.13	strelka	5_prime_UTR_variant	5UTR	RSG7	FBgn0024941
P11	X	18130237	TA	T	del:1	0.227	0.227	strelka	upstream_gene_variant	intergenic	intergenic	intergenic
P11	X	18511571	AAAT	A	del:3	0.136	0.136	strelka	upstream_gene_variant	intron	Ggt-1	FBgn0030932
P11	X	19075676	GT	G	del:1	0.19	0.19	strelka	upstream_gene_variant	intergenic	intergenic	intergenic
P11	X	19390181	ATATGTATATG	A	del:10	0.214	0.214	mutect2	intron_variant	intron	kek5	FBgn0031016
P11	X	20351785	C	CA	ins:1	0.214	0.214	strelka	intergenic_region	intergenic	intergenic	intergenic
P11	X	21054973	G	GT	ins:1	0.143	0.143	strelka	upstream_gene_variant	intron	bves	FBgn0031150
P15	2L	4438899	C	CA	ins:1	0.0943	0.1886	strelka	upstream_gene_variant	intron	CG15431	FBgn0031602
P15	2L	5362422	A	AC	ins:1	0.214	0.428	strelka	intron_variant	intron	nompC	FBgn0016920
P15	2L	5483864	GTTGGCTCAAATCTA	G	del:14	0.208	0.416	strelka	upstream_gene_variant	intergenic	intergenic	intergenic
P15	2L	5483883	ACTC	A	del:3	0.227	0.454	strelka	upstream_gene_variant	intergenic	intergenic	intergenic
P15	2L	7613334	A	AT	ins:1	0.13	0.26	strelka	intron_variant	intron	CG6739	FBgn0031926
P15	2L	8351610	ATATACGTACAACTTTTCTATATAC	A	del:24	0.217	0.434	strelka	upstream_gene_variant	intergenic	intergenic	intergenic
P15	2L	10789938	G	GT	ins:1	0.174	0.348	strelka	upstream_gene_variant	intron	CG31869	FBgn0051869
P15	2L	14271452	GA	G	del:1	0.0769	0.1538	strelka	upstream_gene_variant	intron	wb	FBgn0261563
P15	2L	16583819	G	GTTTTGTTGTTTTATCC	ins:16	0.233	0.466	strelka	intron_variant	intron	CG42389	FBgn0259735
P15	2L	17164299	G	GAAAAAATAAAAATAATA	ins:17	0.25	0.5	strelka	intron_variant	intron	CG34106	FBgn0083942
P15	2L	22715852	GT	G	del:1	0.093	0.186	strelka	intron_variant	intron	CG40006	FBgn0058006
P15	2R	503706	AT	A	del:1	0.115	0.23	strelka	intron_variant	intron	CG45781	FBgn0267428
P15	2R	4249855	GA	G	del:1	0.0755	0.151	strelka	intergenic_region	intergenic	intergenic	intergenic
P15	2R	8492281	CGT	C	del:2	0.188	0.376	strelka	intron_variant	intron	mtt	FBgn0050361
P15	2R	10513522	TTA	T	del:2	0.159	0.318	strelka	downstream_gene_variant	intron	lola	FBgn0283521
P15	2R	11105369	GT	G	del:1	0.2	0.4	strelka	intron_variant	intron	luna	FBgn0040765
P15	2R	12271732	AAATAACTAAAAG	A	del:12	0.364	0.728	mutect2	intron_variant	intron	Cam	FBgn0000253
P15	2R	12551776	TTG	T	del:2	0.208	0.416	strelka	intron_variant	intron	fra	FBgn0011592
P15	2R	13310468	G	GA	ins:1	0.182	0.364	strelka	intergenic_region	intergenic	intergenic	intergenic
P15	2R	17134852	TA	T	del:1	0.125	0.25	strelka	3_prime_UTR_variant	3UTR	CG11400	FBgn0034198
P15	2R	17818717	AT	A	del:1	0.0952	0.1904	strelka	upstream_gene_variant	intron	grh	FBgn0259211
P15	2R	17893308	GAGAC	G	del:4	0.0455	0.091	mutect2	upstream_gene_variant	intron	Elk	FBgn0011589
P15	2R	18293557	ATTTGCAAGGGTACGAT	A	del:16	0.323	0.646	strelka	5_prime_UTR_variant	5UTR	CG14502	FBgn0034321
P15	2R	18390531	TTG	T	del:2	0.343	0.686	strelka	upstream_gene_variant	intron	CG15068	FBgn0040733
P15	2R	20650040	G	GTATATATGTACATA	ins:14	0.185	0.37	strelka	downstream_gene_variant	intron	Lrt	FBgn0034540
P15	3L	357461	GA	G	del:1	0.0577	0.1154	mutect2	3_prime_UTR_variant	3UTR	CG1231	FBgn0035134
P15	3L	2321476	A	ATGTGGTTTTCATTCGCATGCGGAT	ins:24	0.133	0.266	strelka	upstream_gene_variant	intergenic	intergenic	intergenic
P15	3L	2441562	A	AATTTT	ins:5	0.16	0.32	mutect2,strelka	intron_variant	intron	CG45186	FBgn0266696
P15	3L	6169562	TTTTTTTG	T	del:7	0.0323	0.0646	mutect2	splice_region_variant	3UTR	CG10289	FBgn0035688
P15	3L	7107244	TACAAGGCAGC	T	del:10	0.222	0.444	strelka	intron_variant	intron	form3	FBgn0053556
P15	3L	9179149	ACACT	A	del:4	0.0508	0.1016	mutect2	splice_region_variant&intron_variant	intron	Rdl	FBgn0004244
P15	3L	10580953	TA	T	del:1	0.0816	0.1632	mutect2	intron_variant	intron	Rbfox1	FBgn0052062
P15	3L	11010384	GTC	G	del:2	0.0851	0.1702	strelka	upstream_gene_variant	intergenic	intergenic	intergenic
P15	3L	13156855	TCGTCCACAAGTATC	T	del:14	0.267	0.534	strelka	intergenic_region	intergenic	intergenic	intergenic
P15	3L	13612654	A	AATGAAGAGG	ins:9	0.3	0.6	strelka	intron_variant	intron	bru3	FBgn0264001
P15	3L	14210743	CT	C	del:1	0.167	0.334	strelka	intron_variant	intron	nuf	FBgn0013718
P15	3L	15553377	TA	T	del:1	0.152	0.304	strelka	upstream_gene_variant	intergenic	intergenic	intergenic
P15	3L	20646492	G	GA	ins:1	0.114	0.228	strelka	intergenic_region	intergenic	intergenic	intergenic
P15	3L	21085101	CT	C	del:1	0.119	0.238	strelka	downstream_gene_variant	intron	ko	FBgn0020294
P15	3L	23674271	C	CA	ins:1	0.136	0.272	strelka	intron_variant	intron	AGO3	FBgn0250816
P15	3L	27384942	T	TTTAA	ins:4	0.0633	0.1266	mutect2	intron_variant	intron	Dbp80	FBgn0024804
P15	3R	7299428	CA	C	del:1	0.378	0.756	mutect2,strelka	intron_variant	intron	rn	FBgn0267337
P15	3R	11395077	C	CA	ins:1	0.167	0.334	strelka	3_prime_UTR_variant	3UTR	pros	FBgn0004595
P15	3R	11998276	G	GTGTGTATGCGAA	ins:12	0.093	0.186	strelka	upstream_gene_variant	intron	Tk	FBgn0037976
P15	3R	13242030	C	CGT	ins:2	0.118	0.236	strelka	intron_variant	intron	Ace	FBgn0000024
P15	3R	20978654	CAA	C	del:2	0.0455	0.091	mutect2	5_prime_UTR_variant	exon_1	Calx	FBgn0013995
P15	3R	21324318	AT	A	del:1	0	0	consensus	intron_variant	intron	CG16791	FBgn0038881
P15	3R	21324320	AG	A	del:1	0	0	consensus	intron_variant	intron	CG16791	FBgn0038881
P15	3R	23605377	AC	A	del:1	0.0625	0.125	mutect2	upstream_gene_variant	intron	CG10184	FBgn0039094
P15	3R	25467884	AACAC	A	del:4	0.0417	0.0834	mutect2	intron_variant	intron	Fur1	FBgn0004509
P15	3R	29408351	GTGTATGTGTGTA	G	del:12	0.0426	0.0852	mutect2	intron_variant	intron	Ptp99A	FBgn0004369
P15	X	3158126	CA	C	del:1	0.227	0.227	strelka	intron_variant	intron	N	FBgn0004647
P15	X	3298165	CGA	C	del:2	0.125	0.125	strelka	intron_variant	intron	dnc	FBgn0000479
P15	X	5154945	AGT	A	del:2	0.0833	0.0833	strelka	intron_variant	intron	CG15465	FBgn0029746
P15	X	5580100	C	CA	ins:1	0.114	0.114	strelka	intergenic_region	intergenic	intergenic	intergenic
P15	X	6793747	TA	T	del:1	0.111	0.111	strelka	upstream_gene_variant	intron	C3G	FBgn0259228
P15	X	7017067	G	GT	ins:1	0.2	0.2	strelka	upstream_gene_variant	intergenic	intergenic	intergenic
P15	X	7076158	GA	G	del:1	0.172	0.172	strelka	3_prime_UTR_variant	3UTR	Sxl	FBgn0264270
P15	X	7433492	A	AT	ins:1	0.2	0.2	strelka	intergenic_region	intergenic	intergenic	intergenic
P15	X	8531806	GAC	G	del:2	0.15	0.15	strelka	5_prime_UTR_variant	5UTR	Nrg	FBgn0264975
P15	X	12924149	TA	T	del:1	0.125	0.125	strelka	intron_variant	intron	fne	FBgn0086675
P15	X	13109176	GT	G	del:1	0.154	0.154	strelka	upstream_gene_variant	intron	CG43313	FBgn0263005
P15	X	13188518	AT	A	del:1	0.267	0.267	strelka	downstream_gene_variant	intron	Lgr4	FBgn0085440
P15	X	13539115	TAC	T	del:2	0.138	0.138	strelka	upstream_gene_variant	intergenic	intergenic	intergenic
P15	X	14593993	TA	T	del:1	0.25	0.25	strelka	upstream_gene_variant	intron	CG9413	FBgn0030574
P15	X	16586118	GCA	G	del:2	0.182	0.182	strelka	upstream_gene_variant	intron	CanA-14F	FBgn0267912
P15	X	16617395	G	GGT	ins:2	0.444	0.444	strelka	downstream_gene_variant	intron	CG9782	FBgn0030763
P15	X	16617402	T	TG	ins:1	0	0	consensus	downstream_gene_variant	intron	CG9782	FBgn0030763
P15	X	16813525	GT	G	del:1	0.16	0.16	strelka	upstream_gene_variant	intron	CG4829	FBgn0030796
P15	X	16817410	CA	C	del:1	0.235	0.235	strelka	upstream_gene_variant	intron	CG4829	FBgn0030796
P15	X	16838599	CTA	C	del:2	0.286	0.286	strelka	3_prime_UTR_variant	3UTR	RSG7	FBgn0024941
P15	X	17295230	GT	G	del:1	0.133	0.133	strelka	5_prime_UTR_variant	5UTR	Fim	FBgn0024238
P15	X	17781682	T	TTG	ins:2	0.158	0.158	strelka	downstream_gene_variant	intergenic	intergenic	intergenic
P15	X	20561257	GAC	G	del:2	0.12	0.12	strelka	intron_variant	intron	RunxB	FBgn0259162
P15	X	21105480	AAAG	A	del:3	0.115	0.115	strelka	upstream_gene_variant	intron	CG1503	FBgn0031157
P15	X	23075792	T	TA	ins:1	0.182	0.182	strelka	downstream_gene_variant	intron	CG17167	FBgn0039941
P15	Y	3245730	AT	A	del:1	0.25	0.25	strelka	intergenic_region	intergenic	intergenic	intergenic
P23	2L	610535	GT	G	del:1	0.114	0.228	strelka	upstream_gene_variant	intergenic	intergenic	intergenic
P23	2L	1461133	GA	G	del:1	0.118	0.236	strelka	intergenic_region	intergenic	intergenic	intergenic
P23	2L	1585368	C	CT	ins:1	0.1	0.2	strelka	frameshift_variant	exon	CG10869	FBgn0031347
P23	2L	3200782	A	AC	ins:1	0.118	0.236	strelka	upstream_gene_variant	intergenic	intergenic	intergenic
P23	2L	3669032	T	TAAAA	ins:4	0.263	0.526	strelka	upstream_gene_variant	intron	Sfp24Bd	FBgn0259953
P23	2L	3669036	AG	A	del:1	0.263	0.526	strelka	upstream_gene_variant	intron	Sfp24Bd	FBgn0259953
P23	2L	4790240	AAG	A	del:2	0.178	0.356	strelka	upstream_gene_variant	intron	CG15630	FBgn0031627
P23	2L	4943222	T	TG	ins:1	0.182	0.364	strelka	frameshift_variant	exon_2	CG14044	FBgn0031650
P23	2L	7290078	GCAA	G	del:3	0.125	0.25	strelka	intergenic_region	intergenic	intergenic	intergenic
P23	2L	7433987	GA	G	del:1	0.308	0.616	strelka	upstream_gene_variant	intergenic	intergenic	intergenic
P23	2L	8500648	GA	G	del:1	0.103	0.206	strelka	upstream_gene_variant	intron	Dh31	FBgn0032048
P23	2L	9403920	GCA	G	del:2	0.143	0.286	strelka	intron_variant	intron	Shawl	FBgn0085395
P23	2L	9512184	GAAACATGCATGAA	G	del:13	0.333	0.666	strelka	intron_variant	intron	CG33298	FBgn0032120
P23	2L	10093172	GT	G	del:1	0.3	0.6	strelka	upstream_gene_variant	intron	CG44153	FBgn0265002
P23	2L	10227537	CA	C	del:1	0.138	0.276	strelka	upstream_gene_variant	intergenic	intergenic	intergenic
P23	2L	10438748	CT	C	del:1	0.167	0.334	strelka	splice_region_variant&intron_variant	intron	STUB1	FBgn0027052
P23	2L	10520957	G	GT	ins:1	0.238	0.476	strelka	upstream_gene_variant	intergenic	intergenic	intergenic
P23	2L	11582210	CGT	C	del:2	0.182	0.364	strelka	5_prime_UTR_variant	exon_1	kek2	FBgn0015400
P23	2L	13645448	GT	G	del:1	0.235	0.47	strelka	upstream_gene_variant	intergenic	intergenic	intergenic
P23	2L	14123320	GA	G	del:1	0.185	0.37	strelka	intergenic_region	intron	CG46301	FBgn0283651
P23	2L	14679604	GA	G	del:1	0.122	0.244	strelka	intron_variant	intron	osp	FBgn0003016
P23	2L	15349706	C	CT	ins:1	0.152	0.304	strelka	intergenic_region	intergenic	intergenic	intergenic
P23	2L	16009175	GT	G	del:1	0.3	0.6	strelka	upstream_gene_variant	intron	beat-Ic	FBgn0028644
P23	2L	17819012	CT	C	del:1	0.207	0.414	strelka	intron_variant	intron	CadN2	FBgn0262018
P23	2L	18126271	C	CA	ins:1	0.25	0.5	strelka	upstream_gene_variant	intron	CG5758	FBgn0032666
P23	2L	18170400	G	GA	ins:1	0.174	0.348	strelka	intron_variant	intron	CG42750	FBgn0261804
P23	2L	18384908	GT	G	del:1	0.16	0.32	strelka	downstream_gene_variant	intron	Fas3	FBgn0000636
P23	2L	19164402	G	GA	ins:1	0.6	1	strelka	upstream_gene_variant	intron	brat	FBgn0010300
P23	2L	19602430	CCACA	C	del:4	0.143	0.286	strelka	upstream_gene_variant	ncRNA	CR44978	FBgn0266313
P23	2L	19625440	TA	T	del:1	0.2	0.4	strelka	intron_variant	intron	CG46244	FBgn0267964
P23	2L	19858164	A	AAAAAG	ins:5	0.0968	0.1936	strelka	intron_variant	intron	sick	FBgn0263873
P23	2L	20290263	ATATG	A	del:4	0.115	0.23	strelka	upstream_gene_variant	intergenic	intergenic	intergenic
P23	2L	20534770	ATGACTTTAGCTTGTGT	A	del:16	0.385	0.77	strelka	downstream_gene_variant	intergenic	intergenic	intergenic
P23	2L	20624622	AT	A	del:1	0.118	0.236	strelka	intron_variant	ncRNA	CR44909	FBgn0266214
P23	2L	21705643	A	AC	ins:1	0.121	0.242	strelka	intron_variant	intron	nolo	FBgn0051619
P23	2L	22927258	CA	C	del:1	0.16	0.32	strelka	intron_variant	intron	lt	FBgn0002566
P23	2R	1248807	TA	T	del:1	0.25	0.5	strelka	intergenic_region	intergenic	intergenic	intergenic
P23	2R	1727911	TA	T	del:1	0.125	0.25	strelka	frameshift_variant	exon_3	CG41520	FBgn0087011
P23	2R	2551985	A	AT	ins:1	0.286	0.572	strelka	downstream_gene_variant	intron	MFS17	FBgn0058263
P23	2R	5964157	TA	T	del:1	0.316	0.632	strelka	downstream_gene_variant	intron	CG7881	FBgn0033048
P23	2R	6216939	TA	T	del:1	0.143	0.286	strelka	upstream_gene_variant	ncRNA	CR44161	FBgn0265044
P23	2R	6438522	A	AC	ins:1	0.273	0.546	strelka	intergenic_region	intergenic	intergenic	intergenic
P23	2R	7371253	CAG	C	del:2	0.148	0.296	mutect2,strelka	intron_variant	intron	Dscam1	FBgn0033159
P23	2R	7770233	T	TATGTAGATACATTC	ins:14	0.273	0.546	strelka	intron_variant	intron	CG30497	FBgn0050497
P23	2R	8394653	CTG	C	del:2	0.167	0.334	strelka	downstream_gene_variant	intron	pdm3	FBgn0261588
P23	2R	9835724	GT	G	del:1	0.154	0.308	strelka	upstream_gene_variant	intron	hebe	FBgn0033448
P23	2R	10583269	TCA	T	del:2	0.174	0.348	strelka	upstream_gene_variant	intron	psq	FBgn0263102
P23	2R	10986186	GT	G	del:1	0.12	0.24	strelka	intron_variant	intron	luna	FBgn0040765
P23	2R	11421693	CT	C	del:1	0.214	0.428	strelka	intron_variant	intron	Drip	FBgn0015872
P23	2R	11984485	C	CG	ins:1	0.308	0.616	strelka	upstream_gene_variant	intron	RnrS	FBgn0011704
P23	2R	12018033	AGT	A	del:2	0.125	0.25	strelka	downstream_gene_variant	intron	otk	FBgn0004839
P23	2R	12100589	GCA	G	del:2	0.13	0.26	strelka	intron_variant	intron	jeb	FBgn0086677
P23	2R	12256147	GCA	G	del:2	0.333	0.666	strelka	upstream_gene_variant	intergenic	intergenic	intergenic
P23	2R	13022898	ATG	A	del:2	0.333	0.666	strelka	intergenic_region	intergenic	intergenic	intergenic
P23	2R	13489105	T	TTTGGTCAAACGATATCGA	ins:18	0.409	0.818	strelka	upstream_gene_variant	intron	bbc	FBgn0033844
P23	2R	13584834	CGT	C	del:2	0.107	0.214	strelka	intron_variant	intron	CG45088	FBgn0266489
P23	2R	14448140	CT	C	del:1	0.107	0.214	strelka	intron_variant	intron	Oaz	FBgn0261613
P23	2R	14731178	ACAG	A	del:3	0.107	0.214	strelka	intergenic_region	intergenic	intergenic	intergenic
P23	2R	14971870	A	ATC	ins:2	0.12	0.24	strelka	frameshift_variant	exon_2	ckn	FBgn0033987
P23	2R	15424884	GT	G	del:1	0.194	0.388	strelka	5_prime_UTR_variant	exon_1	CG43729	FBgn0263980
P23	2R	16150607	CGT	C	del:2	0.108	0.216	strelka	5_prime_UTR_variant	exon_1	lbk	FBgn0034083
P23	2R	16390631	GAA	G	del:2	0.087	0.174	mutect2	downstream_gene_variant	intron	Sema-2b	FBgn0264273
P23	2R	17593227	CGT	C	del:2	0.15	0.3	strelka	5_prime_UTR_variant	exon_1	Smurf	FBgn0029006
P23	2R	17695383	G	GTTTTTTT	ins:7	0.276	0.552	strelka	upstream_gene_variant	intergenic	intergenic	intergenic
P23	2R	17855404	A	AT	ins:1	0.167	0.334	strelka	5_prime_UTR_variant	5UTR	olf186-F	FBgn0041585
P23	2R	17968524	GCA	G	del:2	0.13	0.26	strelka	intergenic_region	intergenic	intergenic	intergenic
P23	2R	18916132	G	GGGGGA	ins:5	0.25	0.5	strelka	upstream_gene_variant	intron	sano	FBgn0034408
P23	2R	20056544	CA	C	del:1	0.125	0.25	strelka	upstream_gene_variant	intergenic	intergenic	intergenic
P23	2R	20368242	G	GT	ins:1	0.19	0.38	strelka	intergenic_region	intergenic	intergenic	intergenic
P23	2R	21087176	CA	C	del:1	0.103	0.206	strelka	3_prime_UTR_variant	exon_5	Treh	FBgn0003748
P23	2R	21092978	T	TGCTTCCATTA	ins:10	0.25	0.5	strelka	upstream_gene_variant	intron	CG34396	FBgn0085425
P23	2R	21093003	T	TCATTTCA	ins:7	0.267	0.534	strelka	upstream_gene_variant	intron	CG34396	FBgn0085425
P23	2R	21093004	AGG	A	del:2	0.267	0.534	strelka	upstream_gene_variant	intron	CG34396	FBgn0085425
P23	2R	21093010	CAGCCG	C	del:5	0.267	0.534	strelka	upstream_gene_variant	intron	CG34396	FBgn0085425
P23	2R	21114786	CCA	C	del:2	0.25	0.5	strelka	upstream_gene_variant	intron	ktub	FBgn0015721
P23	2R	21194879	CAG	C	del:2	0.2	0.4	strelka	downstream_gene_variant	intron	Lapsyn	FBgn0034602
P23	2R	21942562	TAC	T	del:2	0.111	0.222	strelka	intron_variant	intron	Fili	FBgn0085397
P23	2R	22150683	CA	C	del:1	0.1	0.2	strelka	intron_variant	intron	a	FBgn0000008
P23	2R	22934209	ATG	A	del:2	0.111	0.222	strelka	upstream_gene_variant	intergenic	intergenic	intergenic
P23	2R	23157280	TTG	T	del:2	0.2	0.4	strelka	downstream_gene_variant	intron	CG9899	FBgn0034829
P23	2R	23792683	ACAG	A	del:3	0.093	0.186	strelka	upstream_gene_variant	intron	CG9850	FBgn0034903
P23	2R	23885316	C	CT	ins:1	0.2	0.4	strelka	upstream_gene_variant	intergenic	intergenic	intergenic
P23	2R	24480796	GAC	G	del:2	0.125	0.25	strelka	downstream_gene_variant	intron	CG13579	FBgn0035010
P23	3L	649806	GT	G	del:1	0.105	0.21	strelka	upstream_gene_variant	intron	Gale	FBgn0035147
P23	3L	1187944	C	CG	ins:1	0.214	0.428	strelka	upstream_gene_variant	intergenic	intergenic	intergenic
P23	3L	1528463	GT	G	del:1	0.138	0.276	strelka	downstream_gene_variant	intron	Iml1	FBgn0035227
P23	3L	2617768	CCTT	C	del:3	0.0938	0.1876	mutect2	downstream_gene_variant	intron	Pxn	FBgn0011828
P23	3L	2748015	TGAATCTTG	T	del:8	0.429	0.858	strelka	intron_variant	intron	Mrtf	FBgn0052296
P23	3L	3582928	CTG	C	del:2	0.421	0.842	strelka	intron_variant	intron	Eip63E	FBgn0005640
P23	3L	6367760	C	CA	ins:1	0.368	0.736	strelka	downstream_gene_variant	intergenic	intergenic	intergenic
P23	3L	6737767	GACT	G	del:3	0.125	0.25	strelka	conservative_inframe_deletion	exon_7	dikar	FBgn0261934
P23	3L	6943018	G	GA	ins:1	0.129	0.258	strelka	5_prime_UTR_variant	exon_1	tow	FBgn0035719
P23	3L	8041597	GCAA	G	del:3	0.125	0.25	strelka	intron_variant	intron	nmo	FBgn0011817
P23	3L	8096002	CA	C	del:1	0.207	0.414	strelka	upstream_gene_variant	intron	Ect4	FBgn0262579
P23	3L	9033206	CT	C	del:1	0.217	0.434	strelka	intergenic_region	intergenic	intergenic	intergenic
P23	3L	9548934	TAC	T	del:2	0.188	0.376	strelka	upstream_gene_variant	intron	CG42673	FBgn0261555
P23	3L	11130163	A	AG	ins:1	0.125	0.25	strelka	frameshift_variant	exon_4	NaPi-III	FBgn0260795
P23	3L	12162081	CGT	C	del:2	0.111	0.222	strelka	downstream_gene_variant	intron	CG9760	FBgn0036259
P23	3L	12555731	AT	A	del:1	0.129	0.258	strelka	intron_variant	intron	sowah	FBgn0036302
P23	3L	12867107	C	CCA	ins:2	0.214	0.428	strelka	upstream_gene_variant	intergenic	intergenic	intergenic
P23	3L	13771886	CA	C	del:1	0.136	0.272	strelka	intron_variant	intron	bru3	FBgn0264001
P23	3L	15165652	T	TA	ins:1	0.108	0.216	strelka	upstream_gene_variant	intergenic	intergenic	intergenic
P23	3L	15847162	CT	C	del:1	0.138	0.276	strelka	upstream_gene_variant	intergenic	intergenic	intergenic
P23	3L	15946295	AT	A	del:1	0.211	0.422	strelka	intron_variant	intron	Pka-C3	FBgn0000489
P23	3L	17570272	GTA	G	del:2	0.115	0.23	strelka	upstream_gene_variant	intron	Eip74EF	FBgn0000567
P23	3L	17952714	A	AT	ins:1	0.6	1	strelka	3_prime_UTR_variant	3UTR	Eip75B	FBgn0000568
P23	3L	17970547	TTGC	T	del:3	0.143	0.286	strelka	disruptive_inframe_deletion	exon_1	Eip75B	FBgn0000568
P23	3L	19788049	TA	T	del:1	0.286	0.572	strelka	intron_variant	intron	Gyc76C	FBgn0266136
P23	3L	20368983	AG	A	del:1	0.108	0.216	strelka	frameshift_variant	exon	in	FBgn0001259
P23	3L	20416253	AAC	A	del:2	0	0	consensus	intron_variant	intron	zye	FBgn0036985
P23	3L	23714659	GA	G	del:1	0.25	0.5	strelka	upstream_gene_variant	intergenic	intergenic	intergenic
P23	3L	23877928	C	CA	ins:1	0.182	0.364	strelka	downstream_gene_variant	intron	CG40470	FBgn0058470
P23	3L	24250306	C	CA	ins:1	0.238	0.476	strelka	intron_variant	intron	Snap25	FBgn0011288
P23	3L	24709632	AAATCCTAAAT	A	del:10	0.324	0.648	strelka	intergenic_region	intergenic	intergenic	intergenic
P23	3L	24918454	CGCTATT	C	del:6	0.167	0.334	strelka	intergenic_region	intergenic	intergenic	intergenic
P23	3L	25117644	AT	A	del:1	0.0741	0.1482	strelka	upstream_gene_variant	intergenic	intergenic	intergenic
P23	3L	26032414	TA	T	del:1	0.273	0.546	strelka	intergenic_region	intergenic	intergenic	intergenic
P23	3L	26665639	CT	C	del:1	0.211	0.422	strelka	intergenic_region	intergenic	intergenic	intergenic
P23	3R	557231	GGGGGA	G	del:5	0.324	0.648	strelka	intergenic_region	intergenic	intergenic	intergenic
P23	3R	2082284	A	AATTT	ins:4	0.333	0.666	strelka	intron_variant	intron	Myo81F	FBgn0267431
P23	3R	2524987	GC	G	del:1	0.133	0.266	strelka	intergenic_region	intron	Myo81F	FBgn0267431
P23	3R	2630493	TA	T	del:1	0.75	1	strelka	intron_variant	intron	Pzl	FBgn0267430
P23	3R	3756939	G	GT	ins:1	0.167	0.334	strelka	downstream_gene_variant	intergenic	intergenic	intergenic
P23	3R	7420801	CT	C	del:1	0.231	0.462	strelka	5_prime_UTR_variant	5UTR	wa-cup	FBgn0037502
P23	3R	7655963	C	CT	ins:1	0.136	0.272	strelka	upstream_gene_variant	intergenic	intergenic	intergenic
P23	3R	7681582	ATG	A	del:2	0.125	0.25	strelka	intron_variant	intron	Nlg1	FBgn0051146
P23	3R	8462037	TGCA	T	del:3	0.167	0.334	strelka	intron_variant	intron	CG45263	FBgn0266801
P23	3R	9784967	G	GA	ins:1	0.135	0.27	strelka	upstream_gene_variant	intron	CG8500	FBgn0037754
P23	3R	10294880	CA	C	del:1	0.222	0.444	strelka	intron_variant	intron	CG43143	FBgn0262617
P23	3R	10641748	CT	C	del:1	0.2	0.4	strelka	upstream_gene_variant	exon_2	CR44018	FBgn0264788
P23	3R	10946727	TA	T	del:1	0.129	0.258	strelka	upstream_gene_variant	intergenic	intergenic	intergenic
P23	3R	11097004	TAC	T	del:2	0.111	0.222	strelka	upstream_gene_variant	intergenic	intergenic	intergenic
P23	3R	11118443	GCA	G	del:2	0.2	0.4	strelka	upstream_gene_variant	intergenic	intergenic	intergenic
P23	3R	11239167	C	CA	ins:1	0.121	0.242	strelka	frameshift_variant	exon_4	CG31388	FBgn0051388
P23	3R	11974890	AT	A	del:1	0.125	0.25	strelka	5_prime_UTR_variant	5UTR	Tango9	FBgn0260744
P23	3R	12146096	A	AG	ins:1	0.138	0.276	strelka	intron_variant	intron	dpr15	FBgn0037993
P23	3R	12720033	GGA	G	del:2	0.133	0.266	strelka	splice_region_variant&intron_variant	intron	Men	FBgn0002719
P23	3R	13985995	G	GA	ins:1	0.114	0.228	strelka	upstream_gene_variant	intron	rdx	FBgn0264493
P23	3R	14838199	CT	C	del:1	0.0952	0.1904	strelka	downstream_gene_variant	intron	btsz	FBgn0266756
P23	3R	15301597	C	CA	ins:1	0.156	0.312	strelka	downstream_gene_variant	intron	Tm1	FBgn0003721
P23	3R	15458350	TG	T	del:1	0.4	0.8	strelka	intron_variant	intron	AdamTS-A	FBgn0038341
P23	3R	15801220	CA	C	del:1	0.25	0.5	strelka	3_prime_UTR_variant	3UTR	nsl1	FBgn0262527
P23	3R	16107249	GGCA	G	del:3	0.115	0.23	strelka	downstream_gene_variant	intergenic	intergenic	intergenic
P23	3R	16535455	CGT	C	del:2	0.143	0.286	strelka	intron_variant	intron	CG42342	FBgn0259244
P23	3R	16735741	TAC	T	del:2	0.0882	0.1764	strelka	upstream_gene_variant	intergenic	intergenic	intergenic
P23	3R	16861212	C	CG	ins:1	0.125	0.25	strelka	upstream_gene_variant	ncRNA	iab-8	FBgn0264857
P23	3R	18872643	GCA	G	del:2	0.167	0.334	strelka	upstream_gene_variant	intergenic	intergenic	intergenic
P23	3R	19487062	AT	A	del:1	0.261	0.522	strelka	upstream_gene_variant	intron	Dys	FBgn0260003
P23	3R	19567781	C	CA	ins:1	0.174	0.348	strelka	upstream_gene_variant	intron	Dys	FBgn0260003
P23	3R	19732550	AGT	A	del:2	0.2	0.4	strelka	intron_variant	intron	GluClalpha	FBgn0024963
P23	3R	21782351	TAC	T	del:2	0.0882	0.1764	strelka	5_prime_UTR_variant	exon_1	tsl	FBgn0003867
P23	3R	22100289	GA	G	del:1	0.148	0.296	strelka	upstream_gene_variant	intergenic	intergenic	intergenic
P23	3R	22910865	ATG	A	del:2	0.158	0.316	strelka	intron_variant	intron	klg	FBgn0017590
P23	3R	23195178	C	CA	ins:1	0.2	0.4	strelka	upstream_gene_variant	intron	cnc	FBgn0262975
P23	3R	23211411	GT	G	del:1	0.138	0.276	strelka	intron_variant	intron	cnc	FBgn0262975
P23	3R	23633777	GAC	G	del:2	0.0833	0.1666	strelka	intron_variant	intron	CG31145	FBgn0051145
P23	3R	24301197	C	CAAAA	ins:4	0.343	0.686	strelka	intron_variant	intron	crb	FBgn0259685
P23	3R	24408055	GCA	G	del:2	0.185	0.37	strelka	intron_variant	intron	nAChRalpha1	FBgn0000036
P23	3R	24922721	T	TG	ins:1	0.121	0.242	strelka	frameshift_variant	exon_2	Mink	FBgn0039250
P23	3R	25965289	AC	A	del:1	0.121	0.242	strelka	frameshift_variant	exon_5	boss	FBgn0000206
P23	3R	27451123	CT	C	del:1	0.087	0.174	strelka	intergenic_region	intergenic	intergenic	intergenic
P23	3R	28440578	AGT	A	del:2	0.111	0.222	strelka	intron_variant	intron	beat-VI	FBgn0039584
P23	3R	28560695	AGT	A	del:2	0.129	0.258	strelka	intergenic_region	intergenic	intergenic	intergenic
P23	3R	29706688	T	TG	ins:1	0.174	0.348	strelka	intergenic_region	intergenic	intergenic	intergenic
P23	3R	30264321	A	AC	ins:1	0.412	0.824	strelka	intergenic_region	intergenic	intergenic	intergenic
P23	3R	30460827	CA	C	del:1	0.3	0.6	strelka	5_prime_UTR_variant	exon_1	CDase	FBgn0039774
P23	4	584320	AT	A	del:1	0.222	0.444	strelka	downstream_gene_variant	intron	CG1909	FBgn0039911
P23	X	5196363	C	CT	ins:1	0.2	0.2	strelka	intron_variant	intron	CG15465	FBgn0029746
P23	X	8488872	A	AT	ins:1	0.333	0.333	strelka	upstream_gene_variant	intron	otu	FBgn0003023
P23	X	9074075	A	AT	ins:1	0.2	0.2	strelka	upstream_gene_variant	intron	CG44325	FBgn0265413
P23	X	9093991	C	CT	ins:1	0.208	0.208	strelka	3_prime_UTR_variant	3UTR	CG7766	FBgn0030087
P23	X	9734181	AT	A	del:1	0.273	0.273	strelka	intron_variant	intron	Sp1	FBgn0020378
P23	X	11068636	A	ATG	ins:2	0.231	0.231	strelka	downstream_gene_variant	intergenic	intergenic	intergenic
P23	X	12840863	TTG	T	del:2	0.167	0.167	strelka	intron_variant	intron	Pde9	FBgn0259171
P23	X	13072511	GA	G	del:1	0.235	0.235	strelka	intron_variant	intron	rad	FBgn0265597
P23	X	13286503	TC	T	del:1	0.174	0.174	strelka	frameshift_variant	exon_1	CG15743	FBgn0030465
P23	X	13529563	A	AC	ins:1	0.231	0.231	strelka	upstream_gene_variant	intergenic	intergenic	intergenic
P23	X	13578364	GA	G	del:1	0.143	0.143	strelka	intron_variant	intron	Tango13	FBgn0086674
P23	X	16271116	ATG	A	del:2	0.273	0.273	strelka	upstream_gene_variant	intron	Mfe2	FBgn0030731
P23	X	17681578	GAGC	G	del:3	0.333	0.333	strelka	5_prime_UTR_variant	exon_2	chas	FBgn0263258
P23	X	17878160	AAC	A	del:2	0.222	0.222	strelka	5_prime_UTR_variant	5UTR	mnb	FBgn0259168
P23	X	18008971	AAC	A	del:2	0.273	0.273	strelka	upstream_gene_variant	intron	Sh	FBgn0003380
P23	X	18517293	CA	C	del:1	0.214	0.214	strelka	upstream_gene_variant	intron	HisRS	FBgn0027087
P23	X	19990202	A	AC	ins:1	0.15	0.15	strelka	intergenic_region	intergenic	intergenic	intergenic
P23	X	22424552	TG	T	del:1	0.182	0.182	strelka	intergenic_region	intergenic	intergenic	intergenic
P25	2L	1048167	C	CCT	ins:2	0.125	0.25	mutect2,strelka	upstream_gene_variant	intergenic	intergenic	intergenic
P25	2L	1921011	CA	C	del:1	0.087	0.174	strelka	intron_variant	intron	Wdr62	FBgn0031374
P25	2L	2895204	T	TC	ins:1	0.167	0.334	strelka	intron_variant	intron	lilli	FBgn0041111
P25	2L	3093670	A	AAGCATTCCCACCAAGTAT	ins:18	0.391	0.782	strelka	upstream_gene_variant	intron	toc	FBgn0015600
P25	2L	3127669	CTGG	C	del:3	0.154	0.308	strelka	disruptive_inframe_deletion	exon_2	toc	FBgn0015600
P25	2L	4211078	GA	G	del:1	0.105	0.21	strelka	intron_variant	intron	ft	FBgn0001075
P25	2L	4782205	GT	G	del:1	0.2	0.4	strelka	intron_variant	intron	CG15630	FBgn0031627
P25	2L	4876023	AT	A	del:1	0.222	0.444	strelka	3_prime_UTR_variant	3UTR	smog	FBgn0051660
P25	2L	5224332	GA	G	del:1	0.132	0.264	strelka	intron_variant	intron	tkv	FBgn0003716
P25	2L	5242090	CA	C	del:1	0.0741	0.1482	strelka	upstream_gene_variant	intron	tkv	FBgn0003716
P25	2L	5786118	CT	C	del:1	0.174	0.348	strelka	downstream_gene_variant	intron	CG9171	FBgn0031738
P25	2L	7115523	GT	G	del:1	0.0851	0.1702	strelka	intron_variant	intron	Pvf3	FBgn0085407
P25	2L	7142133	ATG	A	del:2	0.182	0.364	strelka	upstream_gene_variant	intron	Pvf3	FBgn0085407
P25	2L	7866090	TTGC	T	del:3	0.195	0.39	strelka	disruptive_inframe_deletion	exon	Proc	FBgn0045038
P25	2L	7941416	CTG	C	del:2	0.143	0.286	strelka	intron_variant	intron	Snoo	FBgn0085450
P25	2L	8221658	GT	G	del:1	0.105	0.21	strelka	frameshift_variant	exon	Pvr	FBgn0032006
P25	2L	9601750	TATATGATATG	T	del:10	0.333	0.666	strelka	upstream_gene_variant	intergenic	intergenic	intergenic
P25	2L	10036156	GA	G	del:1	0.2	0.4	strelka	intron_variant	intron	obst-B	FBgn0027600
P25	2L	10143767	GA	G	del:1	0.108	0.216	strelka	upstream_gene_variant	intron	CG44153	FBgn0265002
P25	2L	10350259	CT	C	del:1	0.3	0.6	strelka	downstream_gene_variant	intron	CG34367	FBgn0085396
P25	2L	10942462	CA	C	del:1	0.093	0.186	strelka	downstream_gene_variant	exon_1	CR44492	FBgn0265685
P25	2L	11689602	CCA	C	del:2	0.167	0.334	strelka	intergenic_region	intergenic	intergenic	intergenic
P25	2L	12537807	TTGC	T	del:3	0.174	0.348	strelka	disruptive_inframe_deletion	exon_3	bun	FBgn0259176
P25	2L	12579287	TA	T	del:1	0.125	0.25	strelka	upstream_gene_variant	intergenic	intergenic	intergenic
P25	2L	12805376	TTG	T	del:2	0.211	0.422	strelka	downstream_gene_variant	intergenic	intergenic	intergenic
P25	2L	12959252	A	ACAATT	ins:5	0.261	0.522	strelka	intergenic_region	intergenic	intergenic	intergenic
P25	2L	12959255	G	GTATATTCTTAGTTA	ins:14	0.238	0.476	strelka	intergenic_region	intergenic	intergenic	intergenic
P25	2L	13592203	GGCA	G	del:3	0.0889	0.1778	strelka	downstream_gene_variant	intron	kuz	FBgn0259984
P25	2L	16629234	AT	A	del:1	0.0851	0.1702	strelka	upstream_gene_variant	intron	CG42389	FBgn0259735
P25	2L	18094077	C	CA	ins:1	0.152	0.304	strelka	upstream_gene_variant	intergenic	intergenic	intergenic
P25	2L	18238300	CT	C	del:1	0.182	0.364	strelka	intron_variant	intron	CG42750	FBgn0261804
P25	2L	18384908	GT	G	del:1	0.167	0.334	strelka	downstream_gene_variant	intron	Fas3	FBgn0000636
P25	2L	18840890	AT	A	del:1	0.278	0.556	strelka	upstream_gene_variant	intron	CG31752	FBgn0051752
P25	2L	19635163	CA	C	del:1	0.129	0.258	strelka	intron_variant	intron	CG46244	FBgn0267964
P25	2L	21961377	GCA	G	del:2	0.0811	0.1622	strelka	upstream_gene_variant	intergenic	intergenic	intergenic
P25	2R	1334631	C	CA	ins:1	0.109	0.218	strelka	intergenic_region	intergenic	intergenic	intergenic
P25	2R	1602232	G	GT	ins:1	0.114	0.228	strelka	intergenic_region	intergenic	intergenic	intergenic
P25	2R	4511723	AT	A	del:1	0.138	0.276	strelka	downstream_gene_variant	intergenic	intergenic	intergenic
P25	2R	4848331	CAAGTGCCCAAAATGCTGACCAAAGGTCTGCATTCTTTCCGTGCG	C	del:44	0.312	0.624	strelka	intergenic_region	intergenic	intergenic	intergenic
P25	2R	5018853	ACATGATAAGTAGG	A	del:13	0.222	0.444	strelka	intron_variant	intron	Ir41a	FBgn0040849
P25	2R	5641206	T	TTATTTCCTATATAAATATAGGAAATA	ins:26	0.269	0.538	strelka	3_prime_UTR_variant	3UTR	CG11665	FBgn0033028
P25	2R	5697054	GT	G	del:1	0.148	0.296	strelka	upstream_gene_variant	intergenic	intergenic	intergenic
P25	2R	7247334	A	AG	ins:1	0.2	0.4	strelka	upstream_gene_variant	intergenic	intergenic	intergenic
P25	2R	7752525	GA	G	del:1	0.1	0.2	strelka	intron_variant	intron	CG30497	FBgn0050497
P25	2R	11208202	G	GTT	ins:2	0.3	0.6	strelka	intron_variant	intron	shn	FBgn0003396
P25	2R	11218148	GC	G	del:1	0.13	0.26	strelka	frameshift_variant	exon_3	CG9084	FBgn0033582
P25	2R	11493540	CCA	C	del:2	0.179	0.358	strelka	intron_variant	intron	inv	FBgn0001269
P25	2R	11736683	C	CA	ins:1	0.108	0.216	strelka	intergenic_region	intergenic	intergenic	intergenic
P25	2R	12052386	CGT	C	del:2	0.156	0.312	strelka	upstream_gene_variant	intergenic	intergenic	intergenic
P25	2R	12402458	A	AGT	ins:2	0.3	0.6	strelka	upstream_gene_variant	intron	Cpr49Ae	FBgn0033728
P25	2R	12402462	T	TAAGAAAGTGATTATCACCAACTATTA	ins:26	0.31	0.62	strelka	upstream_gene_variant	intron	Cpr49Ae	FBgn0033728
P25	2R	12588414	GGCA	G	del:3	0.114	0.228	strelka	upstream_gene_variant	intron	Sin3A	FBgn0022764
P25	2R	12980477	TTTA	T	del:3	0.15	0.3	strelka	5_prime_UTR_variant	exon_1	Psc	FBgn0005624
P25	2R	12980491	TA	T	del:1	0	0	consensus	5_prime_UTR_variant	exon_1	Psc	FBgn0005624
P25	2R	12980493	TTA	T	del:2	0	0	consensus	5_prime_UTR_variant	exon_1	Psc	FBgn0005624
P25	2R	13966462	T	TATAG	ins:4	0.312	0.624	strelka	upstream_gene_variant	intron	Cp1	FBgn0013770
P25	2R	14117503	C	CA	ins:1	0.214	0.428	strelka	intron_variant	intron	Prosap	FBgn0040752
P25	2R	16230668	C	CA	ins:1	0.143	0.286	strelka	5_prime_UTR_variant	intron	CG15701	FBgn0034095
P25	2R	16477690	TA	T	del:1	0.138	0.276	strelka	intergenic_region	intergenic	intergenic	intergenic
P25	2R	16830175	AG	A	del:1	0.192	0.384	strelka	upstream_gene_variant	ncRNA	CR43650	FBgn0263659
P25	2R	17351474	GA	G	del:1	0.108	0.216	strelka	intron_variant	intron	mbl	FBgn0265487
P25	2R	17821168	GCAA	G	del:3	0.119	0.238	mutect2,strelka	disruptive_inframe_deletion	exon_3	grh	FBgn0259211
P25	2R	18351879	GTTT	G	del:3	0.643	1	strelka	intron_variant	intron	sbb	FBgn0010575
P25	2R	18542089	GA	G	del:1	0.152	0.304	strelka	downstream_gene_variant	ncRNA	CR46271	FBgn0283428
P25	2R	18844729	CA	C	del:1	0.0678	0.1356	strelka	frameshift_variant	exon_4	CG15099	FBgn0034400
P25	2R	18890536	GGA	G	del:2	0.107	0.214	strelka	intron_variant	intron	sano	FBgn0034408
P25	2R	20136552	CT	C	del:1	0.108	0.216	strelka	upstream_gene_variant	intergenic	intergenic	intergenic
P25	2R	20152022	AGG	A	del:2	0.267	0.534	strelka	downstream_gene_variant	intergenic	intergenic	intergenic
P25	2R	20913588	GC	G	del:1	0.0976	0.1952	strelka	upstream_gene_variant	intergenic	intergenic	intergenic
P25	2R	20958682	TTGC	T	del:3	0.143	0.286	strelka	disruptive_inframe_deletion	exon_2	hbn	FBgn0008636
P25	2R	21116155	AC	A	del:1	0.0702	0.1404	strelka	upstream_gene_variant	intron	ktub	FBgn0015721
P25	2R	21353834	CT	C	del:1	0.12	0.24	strelka	upstream_gene_variant	intergenic	intergenic	intergenic
P25	2R	21568367	TGAC	T	del:3	0.167	0.334	strelka	intron_variant	intron	twz	FBgn0034636
P25	2R	22281441	AAC	A	del:2	0.0938	0.1876	strelka	intron_variant	intron	dve	FBgn0020307
P25	2R	22544289	TTC	T	del:2	0.103	0.206	mutect2	intron_variant	intron	px	FBgn0003175
P25	2R	22708507	T	TCAGGTTTCCTCGAA	ins:14	0.15	0.3	strelka	upstream_gene_variant	intron	CG30275	FBgn0050275
P25	2R	23515645	T	TTTATACA	ins:7	0.292	0.584	strelka	upstream_gene_variant	intergenic	intergenic	intergenic
P25	2R	23628427	CA	C	del:1	0.267	0.534	strelka	upstream_gene_variant	intergenic	intergenic	intergenic
P25	2R	24306335	C	CA	ins:1	0.129	0.258	strelka	intron_variant	intron	betaTub60D	FBgn0003888
P25	3L	852598	G	GT	ins:1	0.545	1	strelka	3_prime_UTR_variant	3UTR	CG13890	FBgn0035169
P25	3L	891004	C	CA	ins:1	0.744	1	strelka	splice_acceptor_variant&intron_variant	intron	Usp10	FBgn0052479
P25	3L	915010	ATG	A	del:2	0.143	0.286	strelka	downstream_gene_variant	intron	Glut1	FBgn0264574
P25	3L	1431772	A	AT	ins:1	0.429	0.858	strelka	downstream_gene_variant	intron	Ptp61F	FBgn0267487
P25	3L	1431797	CACACGCGACTTT	C	del:12	0.6	1	strelka	downstream_gene_variant	intron	Ptp61F	FBgn0267487
P25	3L	2732365	AGT	A	del:2	0.115	0.23	strelka	intron_variant	intron	Mrtf	FBgn0052296
P25	3L	2903779	C	CT	ins:1	0.133	0.266	strelka	intron_variant	intron	Shab	FBgn0262593
P25	3L	3630544	AT	A	del:1	0.0976	0.1952	strelka	intron_variant	intron	dar1	FBgn0263239
P25	3L	3705227	G	GC	ins:1	0.0952	0.1904	strelka	upstream_gene_variant	intergenic	intergenic	intergenic
P25	3L	3953390	CGT	C	del:2	0.261	0.522	strelka	upstream_gene_variant	intergenic	intergenic	intergenic
P25	3L	4612795	G	GA	ins:1	0.13	0.26	strelka	intron_variant	intron	Src64B	FBgn0262733
P25	3L	4717388	T	TAAAA	ins:4	0.571	1	strelka	intron_variant	intron	RhoGEF64C	FBgn0035574
P25	3L	4989798	G	GA	ins:1	0.143	0.286	strelka	downstream_gene_variant	intron	Con	FBgn0005775
P25	3L	4999729	GAC	G	del:2	0.143	0.286	strelka	upstream_gene_variant	intron	Con	FBgn0005775
P25	3L	5089588	TG	T	del:1	0.0755	0.151	strelka	intergenic_region	intergenic	intergenic	intergenic
P25	3L	5817269	C	CATATAT	ins:6	0.13	0.26	strelka	upstream_gene_variant	intron	vn	FBgn0003984
P25	3L	5916008	GA	G	del:1	0.093	0.186	strelka	upstream_gene_variant	intron	CG13288	FBgn0035648
P25	3L	6405031	CA	C	del:1	0.16	0.32	strelka	intron_variant	intron	CG42747	FBgn0261801
P25	3L	7020306	AAC	A	del:2	0.158	0.316	strelka	intron_variant	intron	Mp	FBgn0260660
P25	3L	7321723	AGAG	A	del:3	0.167	0.334	strelka	disruptive_inframe_deletion	exon	RhoGEF4	FBgn0035761
P25	3L	7747183	AGT	A	del:2	0.136	0.272	mutect2,strelka	upstream_gene_variant	intron	CG32373	FBgn0052373
P25	3L	7890176	ACAG	A	del:3	0.0976	0.1952	strelka	disruptive_inframe_deletion	exon_3	CG32365	FBgn0052365
P25	3L	8294275	TA	T	del:1	0.2	0.4	strelka	upstream_gene_variant	intron	CG7201	FBgn0035865
P25	3L	8335390	GT	G	del:1	0.133	0.266	strelka	upstream_gene_variant	intergenic	intergenic	intergenic
P25	3L	10490376	ATTAG	A	del:4	0.15	0.3	strelka	upstream_gene_variant	intron	Rbfox1	FBgn0052062
P25	3L	10492913	TA	T	del:1	0.125	0.25	strelka	3_prime_UTR_variant	3UTR	S-Lap4	FBgn0052064
P25	3L	10661509	G	GT	ins:1	0.375	0.75	strelka	5_prime_UTR_variant	5UTR	CG8003	FBgn0036096
P25	3L	12111438	CTGT	C	del:3	0.0833	0.1666	strelka	upstream_gene_variant	intergenic	intergenic	intergenic
P25	3L	12702524	C	CATAAAACAAAAAGTGATAT	ins:19	0.455	0.91	strelka	intron_variant	intron	mirr	FBgn0014343
P25	3L	12892581	CGA	C	del:2	0.107	0.214	strelka	upstream_gene_variant	intergenic	intergenic	intergenic
P25	3L	13041718	CA	C	del:1	0.114	0.228	strelka	upstream_gene_variant	intergenic	intergenic	intergenic
P25	3L	13205370	T	TCATATTTTGC	ins:10	0.4	0.8	strelka	downstream_gene_variant	intergenic	intergenic	intergenic
P25	3L	13431800	C	CA	ins:1	0.138	0.276	strelka	upstream_gene_variant	intron	CG10713	FBgn0036360
P25	3L	14323738	CT	C	del:1	0.121	0.242	strelka	intron_variant	ncRNA	CR45025	FBgn0266383
P25	3L	15519226	TA	T	del:1	0.118	0.236	strelka	upstream_gene_variant	intron	mex1	FBgn0004228
P25	3L	15831329	TCA	T	del:2	0.107	0.214	strelka	3_prime_UTR_variant	3UTR	dbo	FBgn0040230
P25	3L	16434922	GT	G	del:1	0.152	0.304	strelka	intron_variant	intron	dsx-c73A	FBgn0261799
P25	3L	17590638	CGT	C	del:2	0.19	0.38	strelka	intron_variant	intron	Eip74EF	FBgn0000567
P25	3L	21479573	C	CA	ins:1	0.128	0.256	strelka	upstream_gene_variant	intergenic	intergenic	intergenic
P25	3L	21852348	TC	T	del:1	0.5	1	strelka	downstream_gene_variant	intron	mub	FBgn0262737
P25	3L	23174531	CA	C	del:1	0.1	0.2	strelka	frameshift_variant	exon_1	CG34031	FBgn0054031
P25	3L	24180924	GT	G	del:1	0.156	0.312	strelka	intron_variant	intron	Snap25	FBgn0011288
P25	3L	24684138	CA	C	del:1	0.158	0.316	strelka	intergenic_region	intergenic	intergenic	intergenic
P25	3L	25708770	CA	C	del:1	0.16	0.32	strelka	non_coding_transcript_exon_variant	exon_2	CR45180	FBgn0266690
P25	3L	26751741	CGCTTGGCCG	C	del:9	0.128	0.256	strelka	intergenic_region	intergenic	intergenic	intergenic
P25	3L	27274576	AT	A	del:1	0.138	0.276	strelka	upstream_gene_variant	intergenic	intergenic	intergenic
P25	3L	27290079	CA	C	del:1	0.121	0.242	strelka	intron_variant	intron	Dbp80	FBgn0024804
P25	3R	10571	CG	C	del:1	0.132	0.264	strelka	intergenic_region	intergenic	intergenic	intergenic
P25	3R	22648	C	CG	ins:1	0.268	0.536	strelka	intergenic_region	intergenic	intergenic	intergenic
P25	3R	174004	T	TC	ins:1	0.219	0.438	strelka	intergenic_region	intergenic	intergenic	intergenic
P25	3R	805978	CTGGACTTACA	C	del:10	0.176	0.352	strelka	intergenic_region	intron	Myo81F	FBgn0267431
P25	3R	806008	A	AT	ins:1	0.146	0.292	strelka	intergenic_region	intron	Myo81F	FBgn0267431
P25	3R	3800986	GT	G	del:1	0.146	0.292	strelka	intergenic_region	intergenic	intergenic	intergenic
P25	3R	3813840	CT	C	del:1	0.192	0.384	strelka	intergenic_region	intergenic	intergenic	intergenic
P25	3R	5322376	GT	G	del:1	0.135	0.27	strelka	intron_variant	intron	mtd	FBgn0013576
P25	3R	5520008	GGT	G	del:2	0.111	0.222	strelka	downstream_gene_variant	intron	Itp-r83A	FBgn0010051
P25	3R	5802762	G	GA	ins:1	0.182	0.364	strelka	5_prime_UTR_variant	5UTR	CG11000	FBgn0263353
P25	3R	6057532	C	CT	ins:1	0.138	0.276	strelka	5_prime_UTR_variant	5UTR	CG15580	FBgn0037398
P25	3R	6588977	G	GA	ins:1	0.174	0.348	strelka	intron_variant	intron	dpr11	FBgn0053202
P25	3R	6783150	C	CA	ins:1	0.111	0.222	strelka	upstream_gene_variant	intergenic	intergenic	intergenic
P25	3R	8373702	GGCT	G	del:3	0.135	0.27	strelka	intron_variant	intron	CG45263	FBgn0266801
P25	3R	9254593	AACC	A	del:3	0.114	0.228	strelka	upstream_gene_variant	exon_1	CR16735	FBgn0037666
P25	3R	9560158	CCA	C	del:2	0.15	0.3	strelka	upstream_gene_variant	intron	MBD-like	FBgn0027950
P25	3R	9949877	CTG	C	del:2	0.154	0.308	strelka	downstream_gene_variant	intron	Glut4EF	FBgn0267336
P25	3R	10330943	A	AT	ins:1	0.129	0.258	strelka	upstream_gene_variant	intron	Bruce	FBgn0266717
P25	3R	10617124	GA	G	del:1	0.109	0.218	strelka	upstream_gene_variant	intron	hth	FBgn0001235
P25	3R	11016327	CT	C	del:1	0.167	0.334	strelka	intron_variant	intron	CG34114	FBgn0083950
P25	3R	11265635	CTG	C	del:2	0.195	0.39	strelka	downstream_gene_variant	intergenic	intergenic	intergenic
P25	3R	11717010	CA	C	del:1	0.147	0.294	strelka	upstream_gene_variant	intergenic	intergenic	intergenic
P25	3R	12838316	AT	A	del:1	0.121	0.242	strelka	downstream_gene_variant	intergenic	intergenic	intergenic
P25	3R	13066809	G	GT	ins:1	0.114	0.228	strelka	intron_variant	intron	sim	FBgn0004666
P25	3R	13913640	G	GT	ins:1	0.167	0.334	strelka	intergenic_region	intergenic	intergenic	intergenic
P25	3R	14880227	CA	C	del:1	0.105	0.21	strelka	5_prime_UTR_variant	5UTR	CG3631	FBgn0038268
P25	3R	15080564	GT	G	del:1	0.162	0.324	strelka	3_prime_UTR_variant	3UTR	CG6966	FBgn0038286
P25	3R	15112413	GGAC	G	del:3	0	0	consensus	intron_variant	intron	CG42788	FBgn0261859
P25	3R	15233238	GT	G	del:1	0.1	0.2	strelka	frameshift_variant	exon_26	tefu	FBgn0045035
P25	3R	15617079	G	GCCACGATATTT	ins:11	0.192	0.384	strelka	intergenic_region	intergenic	intergenic	intergenic
P25	3R	17289908	ACCCCTAAGCTGTGT	A	del:14	0.538	1	strelka	upstream_gene_variant	intergenic	intergenic	intergenic
P25	3R	17731269	CG	C	del:1	0.222	0.444	strelka	upstream_gene_variant	intron	Lgr1	FBgn0016650
P25	3R	20424529	A	AGGCAGG	ins:6	0.188	0.376	strelka	intron_variant	intron	Gfrl	FBgn0262869
P25	3R	20947748	C	CGTCTTCCAAAGATATGTTGGCTA	ins:23	0.5	1	strelka	upstream_gene_variant	intergenic	intergenic	intergenic
P25	3R	21936120	G	GGT	ins:2	0.154	0.308	strelka	intergenic_region	intergenic	intergenic	intergenic
P25	3R	21936668	GT	G	del:1	0.111	0.222	strelka	intergenic_region	intergenic	intergenic	intergenic
P25	3R	22597918	C	CTGTGTGTGTGTG	ins:12	0.389	0.778	strelka	intron_variant	intron	Efa6	FBgn0051158
P25	3R	22633092	GCAA	G	del:3	0.136	0.272	strelka	upstream_gene_variant	intron	loco	FBgn0020278
P25	3R	22656009	G	GGGTGTTTGGGTGGTTGGGTGGTTGGGT	ins:27	0.179	0.358	strelka	intron_variant	intron	wake	FBgn0266418
P25	3R	22733149	GCT	G	del:2	0.0889	0.1778	strelka	downstream_gene_variant	intron	Takl2	FBgn0039015
P25	3R	23332062	CA	C	del:1	0.125	0.25	strelka	downstream_gene_variant	intron	pnt	FBgn0003118
P25	3R	23735693	GA	G	del:1	0.121	0.242	strelka	upstream_gene_variant	intron	Hmgcr	FBgn0263782
P25	3R	24408186	GA	G	del:1	0.0851	0.1702	strelka	intron_variant	intron	nAChRalpha1	FBgn0000036
P25	3R	25366874	CT	C	del:1	0.235	0.47	strelka	intron_variant	intron	Fur1	FBgn0004509
P25	3R	25927828	CT	C	del:1	0.114	0.228	strelka	upstream_gene_variant	intron	CCAP-R	FBgn0039396
P25	3R	25975498	TA	T	del:1	0.16	0.32	strelka	intron_variant	intron	CG42261	FBgn0259146
P25	3R	26353681	CA	C	del:1	0.0976	0.1952	strelka	upstream_gene_variant	intron	CG33970	FBgn0053970
P25	3R	26893770	GT	G	del:1	0.087	0.174	strelka	intron_variant	intron	T48	FBgn0004359
P25	3R	26995361	GA	G	del:1	0.111	0.222	strelka	frameshift_variant	exon	TwdlC	FBgn0039469
P25	3R	27302933	TGA	T	del:2	0.321	0.642	strelka	intron_variant	intron	CG3339	FBgn0039510
P25	3R	27806018	C	CT	ins:1	0.129	0.258	strelka	intron_variant	intron	CG34353	FBgn0085382
P25	3R	30413966	C	CA	ins:1	0.267	0.534	strelka	downstream_gene_variant	intergenic	intergenic	intergenic
P25	3R	30968221	T	TG	ins:1	0.143	0.286	strelka	upstream_gene_variant	intergenic	intergenic	intergenic
P25	3R	31450393	T	TC	ins:1	0.115	0.23	strelka	intron_variant	intron	Gprk2	FBgn0261988
P25	3R	31921174	GT	G	del:1	0.154	0.308	strelka	intron_variant	intron	heph	FBgn0011224
P25	4	146765	G	GAAAA	ins:4	0.323	0.646	strelka	upstream_gene_variant	intergenic	intergenic	intergenic
P25	4	1306555	TTG	T	del:2	0.15	0.3	strelka	intergenic_region	intergenic	intergenic	intergenic
P25	X	745318	GA	G	del:1	0.176	0.176	strelka	frameshift_variant	exon_11	sdk	FBgn0021764
P25	X	1973914	TCA	T	del:2	0.25	0.25	strelka	intron_variant	intron	Hr4	FBgn0264562
P25	X	2136380	CGT	C	del:2	0.185	0.185	strelka	5_prime_UTR_variant	5UTR	ph-p	FBgn0004861
P25	X	2929673	TTC	T	del:2	0.158	0.158	strelka	upstream_gene_variant	intron	kirre	FBgn0028369
P25	X	4901881	GCA	G	del:2	0.182	0.182	strelka	intron_variant	intron	CG42594	FBgn0260971
P25	X	5044514	GA	G	del:1	0.143	0.143	strelka	upstream_gene_variant	ncRNA	CR44833	FBgn0266096
P25	X	5208606	GC	G	del:1	0.0976	0.0976	strelka	intron_variant	intron	CG15465	FBgn0029746
P25	X	5216341	GA	G	del:1	0.138	0.138	strelka	intron_variant	intron	CG15465	FBgn0029746
P25	X	5332634	CA	C	del:1	0.16	0.16	strelka	upstream_gene_variant	intron	CanB	FBgn0010014
P25	X	6591057	CGCA	C	del:3	0.143	0.143	strelka	downstream_gene_variant	intron	Pat1	FBgn0029878
P25	X	7394385	TA	T	del:1	0.176	0.176	strelka	intron_variant	intron	CG1677	FBgn0029941
P25	X	7447596	GT	G	del:1	0.2	0.2	strelka	upstream_gene_variant	exon_1	CR45533	FBgn0267089
P25	X	8853928	GA	G	del:1	0.3	0.3	strelka	5_prime_UTR_variant	exon_1	CG12075	FBgn0030065
P25	X	9486340	ACAG	A	del:3	0.158	0.158	mutect2	intron_variant	intron	mgl	FBgn0261260
P25	X	10558653	GT	G	del:1	0.2	0.2	strelka	upstream_gene_variant	intron	spri	FBgn0085443
P25	X	12191077	G	GATGTGA	ins:6	0.222	0.222	strelka	intron_variant	intron	Ten-a	FBgn0267001
P25	X	12285747	TGCA	T	del:3	0.231	0.231	strelka	disruptive_inframe_deletion	exon_4	Ten-a	FBgn0267001
P25	X	12608989	TCA	T	del:2	0.167	0.167	strelka	3_prime_UTR_variant	exon_13	Sec16	FBgn0052654
P25	X	13863210	TGA	T	del:2	0.143	0.143	strelka	3_prime_UTR_variant	3UTR	mamo	FBgn0267033
P25	X	15494714	T	TA	ins:1	0.364	0.364	strelka	upstream_gene_variant	intron	Gmap	FBgn0027287
P25	X	15593014	CT	C	del:1	0.148	0.148	strelka	5_prime_UTR_variant	exon_1	CG9220	FBgn0030662
P25	X	16688728	TC	T	del:1	0.333	0.333	strelka	upstream_gene_variant	intron	2004-09-01	FBgn0259923
P25	X	18993648	CA	C	del:1	0.167	0.167	strelka	intron_variant	intron	CG43759	FBgn0264090
P25	X	19486670	GGCT	G	del:3	0.2	0.2	strelka	disruptive_inframe_deletion	exon_9	pcm	FBgn0020261
P25	X	19873438	CT	C	del:1	0.185	0.185	strelka	upstream_gene_variant	intron	Hers	FBgn0052529
P25	X	21001223	GCA	G	del:2	0.267	0.267	strelka	intergenic_region	intergenic	intergenic	intergenic
P25	X	21009246	AGT	A	del:2	0.176	0.176	strelka	intergenic_region	intergenic	intergenic	intergenic
P25	X	21204705	TG	T	del:1	0.25	0.25	strelka	upstream_gene_variant	intergenic	intergenic	intergenic
P25	X	21660607	TA	T	del:1	0.12	0.12	strelka	intron_variant	ncRNA	flam	FBgn0267704
P25	Y	71032	G	GT	ins:1	0.381	0.381	strelka	intron_variant	intron	kl-5	FBgn0267433
P25	Y	71076	CA	C	del:1	0.286	0.286	strelka	intron_variant	intron	kl-5	FBgn0267433
P27	2L	1347353	C	CAAATTGGA	ins:8	0.13	0.26	strelka	upstream_gene_variant	intergenic	intergenic	intergenic
P27	2L	1628164	TGGGGAGCCAAGAAGAGAAGAAGAG	T	del:24	0.273	0.546	strelka	upstream_gene_variant	intergenic	intergenic	intergenic
P27	2L	3118418	AT	A	del:1	0.154	0.308	strelka	intron_variant	intron	toc	FBgn0015600
P27	2L	3809646	TA	T	del:1	0.0851	0.1702	strelka	3_prime_UTR_variant	3UTR	Reph	FBgn0021800
P27	2L	4161476	A	AAC	ins:2	0.0952	0.1904	strelka	downstream_gene_variant	intergenic	intergenic	intergenic
P27	2L	9210540	A	AT	ins:1	0.35	0.7	strelka	intron_variant	intron	tai	FBgn0041092
P27	2L	11168447	A	ATTTACGAAATTTTATTTAATCTGCCTGTAATTGATCTCTTAT	ins:42	0.13	0.26	strelka	upstream_gene_variant	intron	Ca-beta	FBgn0259822
P27	2L	11903339	T	TAA	ins:2	0.0606	0.1212	strelka	intron_variant	intron	Pde1c	FBgn0264815
P27	2L	12385781	AGTGTT	A	del:5	0.188	0.376	strelka	intron_variant	intron	bru2	FBgn0262475
P27	2L	13069500	A	AC	ins:1	0.0755	0.151	strelka	intergenic_region	intergenic	intergenic	intergenic
P27	2L	13394298	G	GT	ins:1	0.0946	0.1892	strelka	3_prime_UTR_variant	3UTR	RpL24	FBgn0032518
P27	2L	13645448	GT	G	del:1	0.0926	0.1852	strelka	upstream_gene_variant	intergenic	intergenic	intergenic
P27	2L	14469074	TGTAATCGAGTGAGA	T	del:14	0.087	0.174	strelka	intergenic_region	intergenic	intergenic	intergenic
P27	2L	14712508	GA	G	del:1	0.0851	0.1702	strelka	5_prime_UTR_variant	exon_1	CG15282	FBgn0028855
P27	2L	16582537	GT	G	del:1	0.147	0.294	strelka	intron_variant	intron	CG42389	FBgn0259735
P27	2L	17204062	GA	G	del:1	0.098	0.196	strelka	intron_variant	intron	beat-IIIc	FBgn0032629
P27	2L	17619442	G	GT	ins:1	0.0633	0.1266	strelka	intergenic_region	intergenic	intergenic	intergenic
P27	2L	19411331	G	GCTATTCTAT	ins:9	0.25	0.5	strelka	upstream_gene_variant	intron	Pax	FBgn0041789
P27	2L	19411333	C	CTTAA	ins:4	0.226	0.452	strelka	upstream_gene_variant	intron	Pax	FBgn0041789
P27	2L	19411336	G	GGTA	ins:3	0.219	0.438	strelka	upstream_gene_variant	intron	Pax	FBgn0041789
P27	2L	19859792	T	TCAACAGGTATAAAGCAACAGGGGCC	ins:25	0.316	0.632	strelka	intron_variant	intron	sick	FBgn0263873
P27	2R	504091	TA	T	del:1	0.0694	0.1388	strelka	intron_variant	intron	CG45781	FBgn0267428
P27	2R	597691	GT	G	del:1	0.0727	0.1454	strelka	intron_variant	intron	CG45781	FBgn0267428
P27	2R	1074980	CT	C	del:1	0.139	0.278	strelka	upstream_gene_variant	intron	rl	FBgn0003256
P27	2R	5301947	G	GC	ins:1	0.098	0.196	strelka	intergenic_region	intergenic	intergenic	intergenic
P27	2R	6148034	CTA	C	del:2	0.121	0.242	strelka	downstream_gene_variant	intron	EcR	FBgn0000546
P27	2R	10607135	AT	A	del:1	0.127	0.254	strelka	intron_variant	intron	psq	FBgn0263102
P27	2R	10751875	CAT	C	del:2	0.154	0.308	strelka	intron_variant	intron	CG33144	FBgn0053144
P27	2R	13582263	TG	T	del:1	0.0278	0.0556	mutect2	downstream_gene_variant	intron	CG45088	FBgn0266489
P27	2R	13937411	GAACCCAC	G	del:7	0.138	0.276	strelka	intron_variant	intron	shot	FBgn0013733
P27	2R	14044302	GCA	G	del:2	0.167	0.334	strelka	intron_variant	intron	mam	FBgn0002643
P27	2R	15145157	GT	G	del:1	0.0645	0.129	strelka	upstream_gene_variant	intron	Rpb12	FBgn0262954
P27	2R	16611929	GTA	G	del:2	0.15	0.3	strelka	5_prime_UTR_variant	exon_1	CG5065	FBgn0034145
P27	2R	16730006	CA	C	del:1	0.208	0.416	strelka	intron_variant	intron	CG30463	FBgn0050463
P27	2R	17254443	GT	G	del:1	0.114	0.228	strelka	upstream_gene_variant	exon_3	CR43660	FBgn0263708
P27	2R	17868216	C	CTT	ins:2	0.0645	0.129	strelka	upstream_gene_variant	intron	Mapmodulin	FBgn0034282
P27	2R	18160913	CT	C	del:1	0.0725	0.145	strelka	5_prime_UTR_variant	5UTR	CG10915	FBgn0034308
P27	2R	21194966	GCA	G	del:2	0.105	0.21	strelka	downstream_gene_variant	intron	Lapsyn	FBgn0034602
P27	2R	21782165	G	GT	ins:1	0.0606	0.1212	strelka	intergenic_region	intergenic	intergenic	intergenic
P27	2R	21904412	A	ATTTTATTTAT	ins:10	0.387	0.774	strelka	intron_variant	intron	Fili	FBgn0085397
P27	2R	22500793	AGCT	A	del:3	0.0494	0.0988	mutect2	intron_variant	intron	px	FBgn0003175
P27	2R	22739101	C	CT	ins:1	0.103	0.206	strelka	upstream_gene_variant	intron	jbug	FBgn0028371
P27	2R	23570455	GTGCTTCTTTCTTATTCGTTATTTA	G	del:24	0.475	0.95	mutect2	intron_variant	intron	apt	FBgn0015903
P27	3L	128350	G	GA	ins:1	0.133	0.266	strelka	upstream_gene_variant	intergenic	intergenic	intergenic
P27	3L	468144	T	TG	ins:1	0.0562	0.1124	strelka	intron_variant	intron	klar	FBgn0001316
P27	3L	2832038	T	TAAA	ins:3	0.0208	0.0416	mutect2	intron_variant	intron	Tet	FBgn0263392
P27	3L	5160970	GT	G	del:1	0.0769	0.1538	strelka	3_prime_UTR_variant	3UTR	shep	FBgn0052423
P27	3L	5208101	GCA	G	del:2	0.116	0.232	strelka	intron_variant	intron	shep	FBgn0052423
P27	3L	5950383	G	GT	ins:1	0.145	0.29	strelka	5_prime_UTR_variant	exon_1	CG33993	FBgn0053993
P27	3L	6579036	G	GAATTGCTTTCATCTTTT	ins:17	0.3	0.6	strelka	intron_variant	intron	jv	FBgn0263973
P27	3L	6579057	T	TTTGTAAATGAACAG	ins:14	0.231	0.462	strelka	intron_variant	intron	jv	FBgn0263973
P27	3L	6579059	A	AAAGC	ins:4	0.231	0.462	strelka	intron_variant	intron	jv	FBgn0263973
P27	3L	6711067	G	GTA	ins:2	0.176	0.352	strelka	downstream_gene_variant	intergenic	intergenic	intergenic
P27	3L	6900790	AT	A	del:1	0.0889	0.1778	strelka	intergenic_region	intergenic	intergenic	intergenic
P27	3L	6925967	GCA	G	del:2	0.069	0.138	strelka	intergenic_region	intergenic	intergenic	intergenic
P27	3L	7318714	TAC	T	del:2	0.0769	0.1538	strelka	upstream_gene_variant	intergenic	intergenic	intergenic
P27	3L	8148913	C	CA	ins:1	0.0597	0.1194	strelka	intron_variant	intron	CG13676	FBgn0035844
P27	3L	8258161	G	GT	ins:1	0.174	0.348	strelka	intron_variant	intron	Dscam4	FBgn0263219
P27	3L	8750580	AG	A	del:1	0.0678	0.1356	strelka	upstream_gene_variant	intergenic	intergenic	intergenic
P27	3L	9307984	GA	G	del:1	0.111	0.222	strelka	intergenic_region	intergenic	intergenic	intergenic
P27	3L	10472714	AAAAAAGCG	A	del:8	0.0889	0.1778	mutect2	downstream_gene_variant	intergenic	intergenic	intergenic
P27	3L	10678661	TAGAGGACGAC	T	del:10	0.278	0.556	strelka	intron_variant	intron	simj	FBgn0010762
P27	3L	11534862	AT	A	del:1	0.0833	0.1666	strelka	upstream_gene_variant	intron	Mob2	FBgn0259481
P27	3L	11846234	A	AAGTTTTTCTTATCGGCTTCTGC	ins:22	0.211	0.422	strelka	downstream_gene_variant	intergenic	intergenic	intergenic
P27	3L	12838701	A	AT	ins:1	0.1	0.2	strelka	intron_variant	intron	CG10960	FBgn0036316
P27	3L	13619029	TTG	T	del:2	0.0857	0.1714	strelka	upstream_gene_variant	intron	bru3	FBgn0264001
P27	3L	13902891	G	GCC	ins:2	0.0667	0.1334	strelka	5_prime_UTR_variant	exon_1	dysc	FBgn0264006
P27	3L	15411162	CA	C	del:1	0.119	0.238	strelka	downstream_gene_variant	intergenic	intergenic	intergenic
P27	3L	17692909	GT	G	del:1	0.143	0.286	strelka	upstream_gene_variant	intron	Ccn	FBgn0052183
P27	3L	19161421	GT	G	del:1	0.146	0.292	strelka	intron_variant	intron	fz2	FBgn0016797
P27	3L	21042660	A	AT	ins:1	0.143	0.286	strelka	intron_variant	intron	siz	FBgn0026179
P27	3L	25878221	TA	T	del:1	0.107	0.214	strelka	intron_variant	intron	CG40178	FBgn0058178
P27	3L	27796723	TACA	T	del:3	0.15	0.3	strelka	intergenic_region	intergenic	intergenic	intergenic
P27	3R	290822	T	TC	ins:1	0.241	0.482	strelka	intergenic_region	intergenic	intergenic	intergenic
P27	3R	1153746	T	TA	ins:1	0.234	0.468	strelka	intron_variant	intron	Myo81F	FBgn0267431
P27	3R	2386225	C	CA	ins:1	0.119	0.238	strelka	intron_variant	intron	Myo81F	FBgn0267431
P27	3R	2428741	GAT	G	del:2	0.0533	0.1066	strelka	intron_variant	intron	Myo81F	FBgn0267431
P27	3R	6326819	GGA	G	del:2	0.0606	0.1212	strelka	3_prime_UTR_variant	3UTR	Osi17	FBgn0037427
P27	3R	10903513	CGT	C	del:2	0.0806	0.1612	strelka	upstream_gene_variant	intergenic	intergenic	intergenic
P27	3R	10953593	AT	A	del:1	0.0667	0.1334	strelka	downstream_gene_variant	intergenic	intergenic	intergenic
P27	3R	12716342	CT	C	del:1	0.139	0.278	strelka	upstream_gene_variant	intron	Men	FBgn0002719
P27	3R	12949742	ACAG	A	del:3	0.075	0.15	strelka	downstream_gene_variant	intergenic	intergenic	intergenic
P27	3R	13011373	GT	G	del:1	0.2	0.4	strelka	upstream_gene_variant	intergenic	intergenic	intergenic
P27	3R	13021844	TAC	T	del:2	0.121	0.242	strelka	3_prime_UTR_variant	3UTR	CtBP	FBgn0020496
P27	3R	13984683	GT	G	del:1	0.0685	0.137	strelka	upstream_gene_variant	intron	rdx	FBgn0264493
P27	3R	13992149	GA	G	del:1	0.0769	0.1538	strelka	intron_variant	intron	rdx	FBgn0264493
P27	3R	16589145	GT	G	del:1	0.176	0.352	strelka	intergenic_region	intergenic	intergenic	intergenic
P27	3R	16740478	A	ATCTTCTTT	ins:8	0.167	0.334	strelka	downstream_gene_variant	intergenic	intergenic	intergenic
P27	3R	16740482	T	TTCTTAGGTTA	ins:10	0.167	0.334	strelka	downstream_gene_variant	intergenic	intergenic	intergenic
P27	3R	16740492	CT	C	del:1	0.25	0.5	strelka	downstream_gene_variant	intergenic	intergenic	intergenic
P27	3R	17773464	AAG	A	del:2	0.225	0.45	strelka	intron_variant	intron	CG43102	FBgn0262562
P27	3R	18083306	GA	G	del:1	0.0893	0.1786	strelka	downstream_gene_variant	intergenic	intergenic	intergenic
P27	3R	18462633	CT	C	del:1	0.0909	0.1818	strelka	intron_variant	intron	fru	FBgn0004652
P27	3R	18884776	G	GA	ins:1	0.102	0.204	strelka	intergenic_region	intergenic	intergenic	intergenic
P27	3R	20989123	GT	G	del:1	0.139	0.278	strelka	upstream_gene_variant	intron	Calx	FBgn0013995
P27	3R	21429366	CATCTGGGT	C	del:8	0.294	0.588	strelka	intron_variant	intron	lbl	FBgn0008651
P27	3R	21558085	ACT	A	del:2	0.0769	0.1538	strelka	upstream_gene_variant	intergenic	intergenic	intergenic
P27	3R	22077862	C	CAT	ins:2	0.15	0.3	strelka	3_prime_UTR_variant	exon_9	how	FBgn0264491
P27	3R	22684529	TGTGA	T	del:4	0.0455	0.091	mutect2	upstream_gene_variant	intergenic	intergenic	intergenic
P27	3R	22711737	TGTA	T	del:3	0.0851	0.1702	strelka	disruptive_inframe_deletion	exon	wge	FBgn0051151
P27	3R	22794355	AAGGCGG	A	del:6	0.32	0.64	strelka	downstream_gene_variant	intergenic	intergenic	intergenic
P27	3R	23824248	AATTGGTTAACTAAGCTTATTTTAGATGGGAGGGTAC	A	del:36	0.316	0.632	strelka	upstream_gene_variant	intron	CG34355	FBgn0085384
P27	3R	27091193	GA	G	del:1	0.0417	0.0834	mutect2	upstream_gene_variant	intergenic	intergenic	intergenic
P27	3R	27270976	GCA	G	del:2	0.255	0.51	strelka	upstream_gene_variant	intron	l(3)mbt	FBgn0002441
P27	3R	27812684	GGT	G	del:2	0.125	0.25	strelka	intron_variant	intron	CG34353	FBgn0085382
P27	3R	27911730	TTG	T	del:2	0.125	0.25	strelka	upstream_gene_variant	intergenic	intergenic	intergenic
P27	3R	28134116	T	TA	ins:1	0.0714	0.1428	strelka	downstream_gene_variant	intergenic	intergenic	intergenic
P27	3R	28888606	AAC	A	del:2	0.0727	0.1454	strelka	upstream_gene_variant	intron	Doa	FBgn0265998
P27	3R	29394228	T	TG	ins:1	0.0656	0.1312	strelka	intron_variant	intron	Ptp99A	FBgn0004369
P27	3R	29787640	T	TTTC	ins:3	0.208	0.416	strelka	upstream_gene_variant	intron	kay	FBgn0001297
P27	3R	30661510	TGA	T	del:2	0.0541	0.1082	strelka	upstream_gene_variant	intergenic	intergenic	intergenic
P27	3R	31152326	GA	G	del:1	0.273	0.546	strelka	intron_variant	intron	Gycbeta100B	FBgn0013973
P27	3R	31152353	C	CTATAT	ins:5	0.214	0.428	strelka	intron_variant	intron	Gycbeta100B	FBgn0013973
P27	3R	31152359	T	TTATA	ins:4	0.243	0.486	strelka	intron_variant	intron	Gycbeta100B	FBgn0013973
P27	X	992178	CGT	C	del:2	0.129	0.129	strelka	downstream_gene_variant	intergenic	intergenic	intergenic
P27	X	2543751	GCA	G	del:2	0.115	0.115	strelka	downstream_gene_variant	intron	trol	FBgn0267911
P27	X	2962800	G	GA	ins:1	0.125	0.125	strelka	intron_variant	intron	rst	FBgn0003285
P27	X	3722579	TCA	T	del:2	0.172	0.172	strelka	upstream_gene_variant	intron	Tlk	FBgn0283657
P27	X	4057858	GCA	G	del:2	0.167	0.167	strelka	intergenic_region	intergenic	intergenic	intergenic
P27	X	4854510	G	GA	ins:1	0.119	0.119	strelka	intron_variant	intron	CG42594	FBgn0260971
P27	X	5794879	CTG	C	del:2	0.139	0.139	strelka	upstream_gene_variant	intergenic	intergenic	intergenic
P27	X	6148784	C	CT	ins:1	0.0976	0.0976	strelka	intron_variant	intron	Ca-alpha1T	FBgn0264386
P27	X	6422832	AT	A	del:1	0.188	0.188	strelka	upstream_gene_variant	intergenic	intergenic	intergenic
P27	X	6466857	TTG	T	del:2	0.2	0.2	strelka	3_prime_UTR_variant	exon_7	CG42340	FBgn0259242
P27	X	7628628	TAC	T	del:2	0.243	0.243	strelka	upstream_gene_variant	intron	ct	FBgn0004198
P27	X	7773862	G	GT	ins:1	0.121	0.121	strelka	upstream_gene_variant	intergenic	intergenic	intergenic
P27	X	8347239	GCA	G	del:2	0.167	0.167	strelka	intron_variant	intron	nAChRalpha3	FBgn0015519
P27	X	8674573	AC	A	del:1	0.109	0.109	mutect2	upstream_gene_variant	intergenic	intergenic	intergenic
P27	X	9703479	GA	G	del:1	0.105	0.105	strelka	intergenic_region	intergenic	intergenic	intergenic
P27	X	9776966	C	CT	ins:1	0.2	0.2	strelka	upstream_gene_variant	intergenic	intergenic	intergenic
P27	X	9846898	GCA	G	del:2	0.111	0.111	strelka	intron_variant	intron	CG32698	FBgn0052698
P27	X	10724992	CGA	C	del:2	0.125	0.125	strelka	intron_variant	intron	CG32676	FBgn0052676
P27	X	10744864	TAC	T	del:2	0.138	0.138	strelka	5_prime_UTR_variant	exon_2	CR44766	FBgn0265987
P27	X	12683548	GA	G	del:1	0.297	0.297	strelka	downstream_gene_variant	intergenic	intergenic	intergenic
P27	X	12760707	C	CGTGTGG	ins:6	0.188	0.188	strelka	3_prime_UTR_variant	3UTR	CG12717	FBgn0030420
P27	X	13301121	CGT	C	del:2	0.13	0.13	strelka	upstream_gene_variant	intron	CG1764	FBgn0030467
P27	X	13394892	CA	C	del:1	0.179	0.179	strelka	upstream_gene_variant	intergenic	intergenic	intergenic
P27	X	13867657	GT	G	del:1	0.174	0.174	strelka	3_prime_UTR_variant	3UTR	mamo	FBgn0267033
P27	X	13868153	G	GT	ins:1	0.093	0.093	strelka	3_prime_UTR_variant	3UTR	mamo	FBgn0267033
P27	X	13961332	GA	G	del:1	0.194	0.194	strelka	downstream_gene_variant	intron	mamo	FBgn0267033
P27	X	14035810	C	CT	ins:1	0.217	0.217	strelka	intergenic_region	intergenic	intergenic	intergenic
P27	X	14627215	CGT	C	del:2	0.143	0.143	strelka	intron_variant	intron	NetA	FBgn0015773
P27	X	14695717	TTG	T	del:2	0.139	0.139	strelka	intron_variant	intron	NetB	FBgn0015774
P27	X	17201471	CT	C	del:1	0.214	0.214	strelka	upstream_gene_variant	intron	CG8918	FBgn0030823
P27	X	17343147	GCA	G	del:2	0.108	0.108	strelka	intergenic_region	intergenic	intergenic	intergenic
P27	X	17690220	C	CG	ins:1	0.122	0.122	mutect2	intron_variant	intron	chas	FBgn0263258
P27	X	20703165	TC	T	del:1	0.118	0.118	strelka	intergenic_region	intergenic	intergenic	intergenic
P27	Y	1114346	TA	T	del:1	0.143	0.143	strelka	intergenic_region	intergenic	intergenic	intergenic
P27	Y	3623671	CACATGTATGAAA	C	del:12	0.231	0.231	strelka	intergenic_region	intergenic	intergenic	intergenic
P29	2L	4129658	G	GAGGCAGGAA	ins:9	0.24	0.48	strelka	intergenic_region	intergenic	intergenic	intergenic
P29	2L	5271160	AAC	A	del:2	0.0727	0.1454	strelka	downstream_gene_variant	intron	tkv	FBgn0003716
P29	2L	5608595	ATCTGGAGGTTCATACGAACGGACAAGCGGATACG	A	del:34	0.258	0.516	strelka	intron_variant	intron	DIP-eta	FBgn0031725
P29	2L	5814743	AGCTCTTCCAGTAAATAAACAAGGAAAAGCT	A	del:30	0.265	0.53	strelka	downstream_gene_variant	intergenic	intergenic	intergenic
P29	2L	7475870	A	AGGTG	ins:4	0.167	0.334	strelka	frameshift_variant	exon_1	CG6441	FBgn0031920
P29	2L	8550170	CA	C	del:1	0.143	0.286	strelka	intron_variant	intron	Sema-1a	FBgn0011259
P29	2L	10711839	G	GATTTTACA	ins:8	0.152	0.304	strelka	upstream_gene_variant	intergenic	intergenic	intergenic
P29	2L	10797738	CA	C	del:1	0.267	0.534	strelka	downstream_gene_variant	intron	CG31869	FBgn0051869
P29	2L	10933403	GAC	G	del:2	0.087	0.174	strelka	upstream_gene_variant	intron	dpr2	FBgn0261871
P29	2L	10960704	CA	C	del:1	0.14	0.28	strelka	downstream_gene_variant	intron	dpr2	FBgn0261871
P29	2L	12180049	AAG	A	del:2	0.182	0.364	strelka	upstream_gene_variant	intron	bru1	FBgn0000114
P29	2L	12859234	A	AAAGTATCT	ins:8	0.303	0.606	strelka	intergenic_region	intergenic	intergenic	intergenic
P29	2L	16240595	C	CA	ins:1	0.182	0.364	strelka	3_prime_UTR_variant	3UTR	CG42817	FBgn0261999
P29	2L	16565200	TG	T	del:1	0.087	0.174	strelka	intron_variant	intron	CG42389	FBgn0259735
P29	2L	17165306	GA	G	del:1	0.0702	0.1404	strelka	intron_variant	intron	CG34106	FBgn0083942
P29	2L	17717302	GT	G	del:1	0.133	0.266	strelka	intron_variant	intron	CadN	FBgn0015609
P29	2L	21707126	T	TA	ins:1	0.108	0.216	strelka	intron_variant	intron	nolo	FBgn0051619
P29	2L	22408868	TA	T	del:1	0.167	0.334	strelka	intergenic_region	intergenic	intergenic	intergenic
P29	2R	3821740	TA	T	del:1	0.0968	0.1936	strelka	intergenic_region	intergenic	intergenic	intergenic
P29	2R	4246957	CA	C	del:1	0.121	0.242	strelka	upstream_gene_variant	intergenic	intergenic	intergenic
P29	2R	6266442	CT	C	del:1	0.0694	0.1388	strelka	intergenic_region	intergenic	intergenic	intergenic
P29	2R	8656464	CT	C	del:1	0.0755	0.151	mutect2	upstream_gene_variant	intron	ptc	FBgn0003892
P29	2R	11064653	C	CGGAGATTAAAGACAGCCAAATTCT	ins:24	0.216	0.432	strelka	intron_variant	intron	luna	FBgn0040765
P29	2R	11540860	CATGTTTTAATTGTTATTAATAATAAATGTGCTTAAGATA	C	del:39	0.25	0.5	strelka	intergenic_region	intergenic	intergenic	intergenic
P29	2R	11712482	C	CAGTTGTTTTA	ins:10	0.214	0.428	strelka	5_prime_UTR_variant	5UTR	pyr	FBgn0033649
P29	2R	12054555	GT	G	del:1	0.0727	0.1454	strelka	3_prime_UTR_variant	exon_2	CG44314	FBgn0265373
P29	2R	12221899	TA	T	del:1	0.121	0.242	strelka	downstream_gene_variant	intergenic	intergenic	intergenic
P29	2R	12248331	GA	G	del:1	0.439	0.878	strelka	upstream_gene_variant	intergenic	intergenic	intergenic
P29	2R	12801096	AGG	A	del:2	0.28	0.56	strelka	3_prime_UTR_variant	3UTR	sca	FBgn0003326
P29	2R	13769030	T	TCTTC	ins:4	0.182	0.364	mutect2	upstream_gene_variant	intergenic	intergenic	intergenic
P29	2R	14030278	ACAG	A	del:3	0.108	0.216	strelka	upstream_gene_variant	intron	mam	FBgn0002643
P29	2R	16523429	CA	C	del:1	0.118	0.236	strelka	intron_variant	intron	Sema-2a	FBgn0011260
P29	2R	17352857	G	GC	ins:1	0.0625	0.125	strelka	3_prime_UTR_variant	3UTR	mbl	FBgn0265487
P29	2R	19053162	GT	G	del:1	0.103	0.206	strelka	downstream_gene_variant	intergenic	intergenic	intergenic
P29	2R	21239231	T	TATTTCTAA	ins:8	0.179	0.358	strelka	intron_variant	intron	ASPP	FBgn0034606
P29	2R	21239249	A	AATTCTAAT	ins:8	0.296	0.592	strelka	intron_variant	intron	ASPP	FBgn0034606
P29	2R	22746436	C	CAAAA	ins:4	0.259	0.518	strelka	intron_variant	intron	CG42260	FBgn0259145
P29	2R	25210880	A	ATATATTATTATATT	ins:14	0.35	0.7	strelka	intron_variant	intron	CG9380	FBgn0035094
P29	3L	1092813	T	TTA	ins:2	0.136	0.272	strelka	intron_variant	intron	bab1	FBgn0004870
P29	3L	2309810	AATTATAT	A	del:7	0.174	0.348	strelka	intergenic_region	intergenic	intergenic	intergenic
P29	3L	6554759	GT	G	del:1	0.1	0.2	strelka	downstream_gene_variant	intron	CG18769	FBgn0042185
P29	3L	9187690	AC	A	del:1	0.0882	0.1764	strelka	intergenic_region	intergenic	intergenic	intergenic
P29	3L	9628213	CA	C	del:1	0.0909	0.1818	strelka	frameshift_variant	exon_6	Or67b	FBgn0036019
P29	3L	10024746	GT	G	del:1	0.143	0.286	strelka	downstream_gene_variant	intron	dpr6	FBgn0040823
P29	3L	10678833	GA	G	del:1	0.0455	0.091	mutect2	intron_variant	intron	simj	FBgn0010762
P29	3L	11751148	T	TCA	ins:2	0.115	0.23	strelka	upstream_gene_variant	intron	CG6024	FBgn0036202
P29	3L	12047741	C	CAA	ins:2	0.244	0.488	strelka	downstream_gene_variant	intron	rols	FBgn0041096
P29	3L	12047747	C	CTTCACCGCTTCAAAACTTA	ins:19	0.25	0.5	strelka	downstream_gene_variant	intron	rols	FBgn0041096
P29	3L	13798198	A	AT	ins:1	0.308	0.616	strelka	5_prime_UTR_variant	exon_1	bru3	FBgn0264001
P29	3L	15420912	TCA	T	del:2	0.0857	0.1714	strelka	intergenic_region	intergenic	intergenic	intergenic
P29	3L	16294500	G	GAAGCTAAA	ins:8	0.323	0.646	strelka	upstream_gene_variant	intergenic	intergenic	intergenic
P29	3L	16294501	TG	T	del:1	0.3	0.6	strelka	upstream_gene_variant	intergenic	intergenic	intergenic
P29	3L	16294507	A	ATACCTG	ins:6	0.286	0.572	strelka	upstream_gene_variant	intergenic	intergenic	intergenic
P29	3L	18526071	ACG	A	del:2	0.3	0.6	strelka	upstream_gene_variant	intergenic	intergenic	intergenic
P29	3L	20472819	ATTG	A	del:3	0.125	0.25	strelka	disruptive_inframe_deletion	exon_2	CG32428	FBgn0052428
P29	3L	21163293	ACATACAATTTTCCTGGCTGAAGTTT	A	del:25	0.12	0.24	strelka	intron_variant	intron	Ac78C	FBgn0024150
P29	3L	21994820	G	GT	ins:1	0.0805	0.161	strelka	intergenic_region	intergenic	intergenic	intergenic
P29	3L	23965594	CA	C	del:1	0.2	0.4	strelka	intron_variant	intron	CG40470	FBgn0058470
P29	3R	4189275	T	TA	ins:1	0.286	0.572	strelka	upstream_gene_variant	pseudogene	CR33294	FBgn0053294
P29	3R	4546781	CT	C	del:1	0.0602	0.1204	strelka	downstream_gene_variant	intron	CG34357	FBgn0085386
P29	3R	4905291	GA	G	del:1	0.243	0.486	strelka	upstream_gene_variant	intergenic	intergenic	intergenic
P29	3R	7187257	CGT	C	del:2	0.069	0.138	strelka	5_prime_UTR_variant	5UTR	lap	FBgn0086372
P29	3R	7627469	CA	C	del:1	0.087	0.174	strelka	upstream_gene_variant	intron	Nlg3	FBgn0083963
P29	3R	8350051	GA	G	del:1	0.132	0.264	strelka	5_prime_UTR_variant	5UTR	Atg13	FBgn0261108
P29	3R	8533443	GA	G	del:1	0.087	0.174	strelka	upstream_gene_variant	intergenic	intergenic	intergenic
P29	3R	9449280	G	GA	ins:1	0.154	0.308	strelka	3_prime_UTR_variant	3UTR	ps	FBgn0261552
P29	3R	9489646	GATATAT	G	del:6	0.08	0.16	strelka	intron_variant	intron	CG16779	FBgn0037698
P29	3R	9857653	GA	G	del:1	0.156	0.312	strelka	intron_variant	intron	Teh1	FBgn0037766
P29	3R	10724585	AT	A	del:1	0.167	0.334	strelka	intergenic_region	intergenic	intergenic	intergenic
P29	3R	10752290	AT	A	del:1	0.0968	0.1936	strelka	upstream_gene_variant	intergenic	intergenic	intergenic
P29	3R	11593398	GA	G	del:1	0.0649	0.1298	strelka	upstream_gene_variant	intron	Jupiter	FBgn0051363
P29	3R	13462344	TA	T	del:1	0.2	0.4	strelka	upstream_gene_variant	exon_2	CR17025	FBgn0040554
P29	3R	13527419	T	TA	ins:1	0.0976	0.1952	strelka	upstream_gene_variant	intergenic	intergenic	intergenic
P29	3R	18538818	GT	G	del:1	0.0755	0.151	strelka	intron_variant	intron	fru	FBgn0004652
P29	3R	18946808	ATCATAG	A	del:6	0.4	0.8	strelka	upstream_gene_variant	intron	CG42613	FBgn0261262
P29	3R	18946827	TTAACACAAATAAA	T	del:13	0.533	1	strelka	upstream_gene_variant	intron	CG42613	FBgn0261262
P29	3R	19112622	C	CTTTTGCAGT	ins:9	0.217	0.434	strelka	intron_variant	intron	CG6040	FBgn0038679
P29	3R	19589555	TA	T	del:1	0.118	0.236	strelka	downstream_gene_variant	intron	Dys	FBgn0260003
P29	3R	20294675	ACAG	A	del:3	0.0952	0.1904	strelka	disruptive_inframe_deletion	exon_3	cic	FBgn0262582
P29	3R	20394837	GAAACGAAATATCACTATTTTTGCAGCT	G	del:27	0.19	0.38	strelka	intron_variant	intron	Gfrl	FBgn0262869
P29	3R	22799288	C	CAATAAATGATAACTGCTTGT	ins:20	0.12	0.24	strelka	intergenic_region	intergenic	intergenic	intergenic
P29	3R	23003608	GCA	G	del:2	0.104	0.208	strelka	intron_variant	intron	CG34375	FBgn0085404
P29	3R	26065682	GT	G	del:1	0.219	0.438	strelka	upstream_gene_variant	intergenic	intergenic	intergenic
P29	3R	26270374	AAT	A	del:2	0.148	0.296	strelka	intron_variant	intron	CG6154	FBgn0039420
P29	3R	28479191	GAAGAACTAAGAACTAGAAGAAGAAGAACTA	G	del:30	0.13	0.26	strelka	downstream_gene_variant	intergenic	intergenic	intergenic
P29	3R	30758230	GA	G	del:1	0.0513	0.1026	strelka	intergenic_region	intergenic	intergenic	intergenic
P29	4	1250614	G	GTA	ins:2	0.231	0.462	strelka	intron_variant	intron	Cadps	FBgn0053653
P29	X	691556	TA	T	del:1	0.167	0.167	strelka	intron_variant	intron	sdk	FBgn0021764
P29	X	1321796	GAC	G	del:2	0.103	0.103	strelka	upstream_gene_variant	intron	DAAM	FBgn0025641
P29	X	1650313	AT	A	del:1	0.121	0.121	strelka	upstream_gene_variant	3UTR	br	FBgn0283451
P29	X	1825283	GT	G	del:1	0.148	0.148	strelka	5_prime_UTR_variant	5UTR	CG42666	FBgn0261548
P29	X	2781746	G	GT	ins:1	0.16	0.16	strelka	downstream_gene_variant	intron	kirre	FBgn0028369
P29	X	3003417	GA	G	del:1	0.167	0.167	strelka	intron_variant	intron	kirre	FBgn0028369
P29	X	3464282	GT	G	del:1	0.273	0.273	strelka	upstream_gene_variant	ncRNA	CR44999	FBgn0266350
P29	X	3624960	GT	G	del:1	0.111	0.111	strelka	intron_variant	intron	AstA-R1	FBgn0266429
P29	X	3714575	A	ATATTTTTT	ins:8	0.333	0.333	strelka	intron_variant	intron	Rala	FBgn0015286
P29	X	3919647	CA	C	del:1	0.2	0.2	strelka	intron_variant	intron	CG42541	FBgn0260658
P29	X	4546502	T	TTTTG	ins:4	0.25	0.25	strelka	3_prime_UTR_variant	3UTR	Usf	FBgn0029711
P29	X	4853063	TTC	T	del:2	0.0851	0.0851	strelka	intron_variant	intron	CG42594	FBgn0260971
P29	X	5398789	A	ACT	ins:2	0.125	0.125	strelka	downstream_gene_variant	intron	SK	FBgn0029761
P29	X	6309107	AAC	A	del:2	0.128	0.128	strelka	upstream_gene_variant	intergenic	intergenic	intergenic
P29	X	7154075	AAC	A	del:2	0.167	0.167	strelka	upstream_gene_variant	intron	CG9650	FBgn0029939
P29	X	8019641	G	GT	ins:1	0.16	0.16	strelka	frameshift_variant	exon	CG15333	FBgn0029989
P29	X	8050914	GT	G	del:1	0.185	0.185	strelka	intron_variant	intron	fs(1)h	FBgn0004656
P29	X	8666076	GC	G	del:1	0.13	0.13	strelka	intergenic_region	intergenic	intergenic	intergenic
P29	X	8694244	ATC	A	del:2	0.125	0.125	mutect2	upstream_gene_variant	intergenic	intergenic	intergenic
P29	X	8793439	TA	T	del:1	0.2	0.2	strelka	intron_variant	intron	Lim1	FBgn0026411
P29	X	9642094	GA	G	del:1	0.222	0.222	strelka	upstream_gene_variant	intron	Ptpmeg2	FBgn0028341
P29	X	9643078	CA	C	del:1	0.174	0.174	strelka	upstream_gene_variant	intron	Ptpmeg2	FBgn0028341
P29	X	9892395	GT	G	del:1	0.208	0.208	strelka	intron_variant	intron	CG15249	FBgn0030161
P29	X	10427243	CA	C	del:1	0.222	0.222	strelka	intron_variant	intron	CG32683	FBgn0052683
P29	X	10784143	GA	G	del:1	0.148	0.148	strelka	upstream_gene_variant	intron	sesB	FBgn0003360
P29	X	10984421	G	GA	ins:1	0.179	0.179	strelka	intron_variant	intron	CG42339	FBgn0259241
P29	X	11434343	TG	T	del:1	0.118	0.118	strelka	downstream_gene_variant	intron	Evi5	FBgn0262740
P29	X	12498160	GA	G	del:1	0.235	0.235	strelka	upstream_gene_variant	intron	CG2556	FBgn0030396
P29	X	12632753	TTG	T	del:2	0.111	0.111	strelka	upstream_gene_variant	intron	Tomosyn	FBgn0030412
P29	X	14544846	AAC	A	del:2	0.182	0.182	strelka	upstream_gene_variant	intergenic	intergenic	intergenic
P29	X	14711423	CT	C	del:1	0.2	0.2	strelka	intron_variant	intron	NetB	FBgn0015774
P29	X	14712581	GCA	G	del:2	0.185	0.185	strelka	intron_variant	intron	NetB	FBgn0015774
P29	X	15481207	CT	C	del:1	0.231	0.231	strelka	3_prime_UTR_variant	3UTR	CG6324	FBgn0030647
P29	X	15585025	CA	C	del:1	0.267	0.267	strelka	3_prime_UTR_variant	3UTR	CG8097	FBgn0030660
P29	X	16102868	AT	A	del:1	0.147	0.147	strelka	5_prime_UTR_variant	exon_2	CG42354	FBgn0259700
P29	X	16996214	CA	C	del:1	0.25	0.25	strelka	intron_variant	intron	CG45002	FBgn0266354
P29	X	17001326	CA	C	del:1	0.25	0.25	strelka	intron_variant	intron	CG45002	FBgn0266354
P29	X	17415254	CGT	C	del:2	0.174	0.174	strelka	intron_variant	intron	CG8611	FBgn0027602
P29	X	17725413	CT	C	del:1	0.318	0.318	strelka	intron_variant	intron	CG42684	FBgn0261570
P29	X	17809564	G	GT	ins:1	0.375	0.375	strelka	intron_variant	intron	OdsH	FBgn0026058
P29	X	17963478	GGA	G	del:2	0.135	0.135	strelka	intron_variant	intron	Sh	FBgn0003380
P29	X	18327137	GT	G	del:1	0.129	0.129	strelka	intron_variant	intron	CG6123	FBgn0030913
P29	X	18358443	CA	C	del:1	0.214	0.214	strelka	upstream_gene_variant	intergenic	intergenic	intergenic
P29	X	18452876	TA	T	del:1	0.167	0.167	strelka	intron_variant	intron	CG32547	FBgn0052547
P29	X	18474467	CA	C	del:1	0.222	0.222	strelka	intron_variant	intron	CG32547	FBgn0052547
P29	X	18676777	CGCT	C	del:3	0.176	0.176	strelka	upstream_gene_variant	intergenic	intergenic	intergenic
P29	X	19021338	GGT	G	del:2	0.185	0.185	strelka	intron_variant	intron	CG43759	FBgn0264090
P29	X	22595554	CA	C	del:1	0.132	0.132	strelka	intron_variant	intron	Cda4	FBgn0052499
P29	Y	69110	A	AT	ins:1	0.185	0.185	strelka	intron_variant	intron	kl-5	FBgn0267433
P31	2L	1556684	A	AAC	ins:2	0.2	0.4	strelka	5_prime_UTR_variant	exon_2	haf	FBgn0261509
P31	2L	1634801	T	TATG	ins:3	0.188	0.376	strelka	intergenic_region	intergenic	intergenic	intergenic
P31	2L	3792154	TTC	T	del:2	0.0862	0.1724	mutect2	intron_variant	intron	bark	FBgn0031571
P31	2L	4551069	A	AT	ins:1	0.227	0.454	strelka	intron_variant	intron	dpy	FBgn0053196
P31	2L	4893766	CA	C	del:1	0.2	0.4	strelka	upstream_gene_variant	intron	CG3036	FBgn0031645
P31	2L	5483883	ACTC	A	del:3	0.15	0.3	strelka	upstream_gene_variant	intergenic	intergenic	intergenic
P31	2L	6825547	TA	T	del:1	0.0769	0.1538	strelka	intron_variant	intron	sens-2	FBgn0051632
P31	2L	7146198	TA	T	del:1	0.114	0.228	strelka	downstream_gene_variant	intron	Pvf3	FBgn0085407
P31	2L	7714049	CAA	C	del:2	0.16	0.32	strelka	3_prime_UTR_variant	3UTR	CG33296	FBgn0053296
P31	2L	9787132	TC	T	del:1	0.103	0.206	strelka	upstream_gene_variant	intron	IP3K1	FBgn0032147
P31	2L	10263153	C	CAGGG	ins:4	0.111	0.222	strelka	frameshift_variant	exon	Rsf1	FBgn0011305
P31	2L	10263155	ACCCT	A	del:4	0.105	0.21	strelka	frameshift_variant	exon	Rsf1	FBgn0011305
P31	2L	11359879	A	ATAGTGAATAGTGAAAT	ins:16	0.579	1	strelka	intron_variant	intron	salr	FBgn0000287
P31	2L	11704647	TA	T	del:1	0.114	0.228	strelka	intergenic_region	intergenic	intergenic	intergenic
P31	2L	12590320	A	AATCAC	ins:5	0.429	0.858	strelka	intron_variant	intron	nub	FBgn0085424
P31	2L	15405696	AT	A	del:1	0.087	0.174	strelka	intergenic_region	intergenic	intergenic	intergenic
P31	2L	16133620	TA	T	del:1	0.129	0.258	strelka	5_prime_UTR_variant	5UTR	CG4892	FBgn0028884
P31	2L	16253514	G	GA	ins:1	0.0893	0.1786	strelka	upstream_gene_variant	intron	PRL-1	FBgn0024734
P31	2L	16352942	TC	T	del:1	0.0667	0.1334	strelka	5_prime_UTR_variant	5UTR	CG4455	FBgn0028506
P31	2L	16534292	GTC	G	del:2	0.0784	0.1568	strelka	upstream_gene_variant	exon_1	CR45354	FBgn0266894
P31	2L	16873624	G	GT	ins:1	0.19	0.38	strelka	downstream_gene_variant	ncRNA	CR31781	FBgn0051781
P31	2L	18327719	ACT	A	del:2	0.08	0.16	mutect2	intron_variant	intron	Fas3	FBgn0000636
P31	2L	18603056	AT	A	del:1	0.1	0.2	strelka	upstream_gene_variant	intron	CG10413	FBgn0032689
P31	2L	20004573	ACTGG	A	del:4	0.0492	0.0984	mutect2	upstream_gene_variant	intron	CG43861	FBgn0264443
P31	2L	21683884	TA	T	del:1	0.093	0.186	strelka	upstream_gene_variant	intergenic	intergenic	intergenic
P31	2R	1089493	GT	G	del:1	0.0615	0.123	strelka	intron_variant	intron	rl	FBgn0003256
P31	2R	3096921	ACAGTTCAAATT	A	del:11	0.308	0.616	mutect2,strelka	intron_variant	intron	dpr21	FBgn0260995
P31	2R	3283484	A	AT	ins:1	0.128	0.256	strelka	intergenic_region	intergenic	intergenic	intergenic
P31	2R	4024154	CT	C	del:1	0.0595	0.119	strelka	intron_variant	intron	Haspin	FBgn0046706
P31	2R	11399702	A	ACATGAAAATCG	ins:11	0.172	0.344	strelka	upstream_gene_variant	intergenic	intergenic	intergenic
P31	2R	13936012	ATAT	A	del:3	0.381	0.762	strelka	intron_variant	intron	shot	FBgn0013733
P31	2R	14405976	AAT	A	del:2	0.0833	0.1666	mutect2	upstream_gene_variant	intergenic	intergenic	intergenic
P31	2R	14694461	TA	T	del:1	0.118	0.236	strelka	intron_variant	intron	mspo	FBgn0020269
P31	2R	17567488	T	TG	ins:1	0.0714	0.1428	strelka	frameshift_variant	exon_2	Ns2	FBgn0034243
P31	2R	18184076	CCA	C	del:2	0.0755	0.151	strelka	5_prime_UTR_variant	5UTR	CG5721	FBgn0034315
P31	2R	18311891	AAGC	A	del:3	0.08	0.16	strelka	disruptive_inframe_deletion	exon	Tango8	FBgn0040737
P31	2R	18526320	T	TA	ins:1	0.0833	0.1666	strelka	3_prime_UTR_variant	3UTR	CG43066	FBgn0262476
P31	2R	18876893	C	CT	ins:1	0.143	0.286	strelka	upstream_gene_variant	intergenic	intergenic	intergenic
P31	2R	21022566	C	CCCCA	ins:4	0.118	0.236	strelka	upstream_gene_variant	intron	RIC-3	FBgn0050296
P31	2R	21224750	GA	G	del:1	0.0488	0.0976	strelka	upstream_gene_variant	intron	ASPP	FBgn0034606
P31	2R	21270555	T	TGGGCGTCTGGGGCGTCTG	ins:18	0.265	0.53	strelka	upstream_gene_variant	intron	Rgk3	FBgn0085426
P31	2R	21457513	C	CTT	ins:2	0.32	0.64	strelka	intron_variant	intron	Sdc	FBgn0010415
P31	2R	23019202	T	TCC	ins:2	0.194	0.388	strelka	intron_variant	intron	CG42741	FBgn0261705
P31	3L	1994325	G	GA	ins:1	0.423	0.846	strelka	intergenic_region	intergenic	intergenic	intergenic
P31	3L	2184691	GA	G	del:1	0.171	0.342	strelka	upstream_gene_variant	intergenic	intergenic	intergenic
P31	3L	8158852	AATTTTTAAGCT	A	del:11	0.22	0.44	mutect2,strelka	5_prime_UTR_variant	exon_1	CG42445	FBgn0259916
P31	3L	8690021	GA	G	del:1	0.128	0.256	strelka	upstream_gene_variant	intergenic	intergenic	intergenic
P31	3L	9548934	TAC	T	del:2	0.17	0.34	strelka	upstream_gene_variant	intron	CG42673	FBgn0261555
P31	3L	9872009	T	TTTAC	ins:4	0.0645	0.129	strelka	upstream_gene_variant	intergenic	intergenic	intergenic
P31	3L	10248863	A	AT	ins:1	0.133	0.266	strelka	upstream_gene_variant	intergenic	intergenic	intergenic
P31	3L	10290679	GA	G	del:1	0.1	0.2	strelka	non_coding_transcript_exon_variant	exon_1	CR46003	FBgn0267665
P31	3L	10451332	CT	C	del:1	0.121	0.242	strelka	intergenic_region	intergenic	intergenic	intergenic
P31	3L	11303415	C	CTTCCCCA	ins:7	0.158	0.316	strelka	intergenic_region	intergenic	intergenic	intergenic
P31	3L	11595703	GT	G	del:1	0.235	0.47	strelka	upstream_gene_variant	intergenic	intergenic	intergenic
P31	3L	13356874	CA	C	del:1	0.295	0.59	strelka	downstream_gene_variant	intron	Nplp2	FBgn0040813
P31	3L	14956104	CA	C	del:1	0.114	0.228	strelka	intergenic_region	intergenic	intergenic	intergenic
P31	3L	17659776	GAAACCCACGGCAAGATCTAAATCA	G	del:24	0.312	0.624	strelka	downstream_gene_variant	intergenic	intergenic	intergenic
P31	3L	20907693	T	TG	ins:1	0.0741	0.1482	strelka	downstream_gene_variant	intergenic	intergenic	intergenic
P31	3L	21385262	CT	C	del:1	0.161	0.322	strelka	intron_variant	intron	rgn	FBgn0261258
P31	3L	21397521	CA	C	del:1	0.0862	0.1724	strelka	upstream_gene_variant	intron	rgn	FBgn0261258
P31	3L	21782311	G	GTTTACCTCCCTACCT	ins:15	0.207	0.414	strelka	intergenic_region	intergenic	intergenic	intergenic
P31	3L	22626863	AT	A	del:1	0.0645	0.129	mutect2	intron_variant	intron	CG14459	FBgn0037171
P31	3L	22677014	A	AT	ins:1	0.0784	0.1568	strelka	intron_variant	intron	CG14457	FBgn0037174
P31	3L	24748880	CA	C	del:1	0.114	0.228	strelka	intron_variant	intron	scro	FBgn0028993
P31	3L	25766534	CATT	C	del:3	0.111	0.222	strelka	upstream_gene_variant	intergenic	intergenic	intergenic
P31	3R	932603	ATT	A	del:2	0.333	0.666	strelka	intron_variant	intron	Myo81F	FBgn0267431
P31	3R	4578835	AT	A	del:1	0.133	0.266	strelka	upstream_gene_variant	intergenic	intergenic	intergenic
P31	3R	4759675	C	CT	ins:1	0.0909	0.1818	strelka	intron_variant	intron	CG44098	FBgn0264907
P31	3R	5957615	TA	T	del:1	0.103	0.206	strelka	downstream_gene_variant	intron	CG34113	FBgn0083949
P31	3R	7780901	AT	A	del:1	0.0725	0.145	strelka	3_prime_UTR_variant	3UTR	CG18747	FBgn0042104
P31	3R	9595089	G	GT	ins:1	0.122	0.244	strelka	upstream_gene_variant	intron	CG8312	FBgn0037720
P31	3R	10905805	G	GT	ins:1	0.122	0.244	strelka	intergenic_region	intergenic	intergenic	intergenic
P31	3R	11189352	ATG	A	del:2	0.103	0.206	strelka	intergenic_region	intergenic	intergenic	intergenic
P31	3R	12849908	CCA	C	del:2	0.111	0.222	strelka	upstream_gene_variant	intergenic	intergenic	intergenic
P31	3R	12892438	GT	G	del:1	0.195	0.39	strelka	downstream_gene_variant	intron	d-cup	FBgn0038089
P31	3R	15527009	T	TG	ins:1	0.115	0.23	strelka	downstream_gene_variant	intergenic	intergenic	intergenic
P31	3R	15725586	GT	G	del:1	0.0833	0.1666	strelka	intergenic_region	intergenic	intergenic	intergenic
P31	3R	17900048	TTG	T	del:2	0.136	0.272	strelka	intron_variant	intron	Rim	FBgn0053547
P31	3R	18129558	TC	T	del:1	0.0385	0.077	mutect2	intron_variant	intron	sr	FBgn0003499
P31	3R	18445371	GT	G	del:1	0.174	0.348	strelka	intron_variant	intron	fru	FBgn0004652
P31	3R	18621178	GT	G	del:1	0.162	0.324	strelka	upstream_gene_variant	intron	CG14304	FBgn0038629
P31	3R	18911070	CT	C	del:1	0.231	0.462	strelka	3_prime_UTR_variant	3UTR	CG14291	FBgn0038660
P31	3R	19407534	C	CA	ins:1	0.125	0.25	strelka	upstream_gene_variant	intergenic	intergenic	intergenic
P31	3R	19603657	C	CAAGTTCTTTCAACGCT	ins:16	0.348	0.696	strelka	upstream_gene_variant	intron	CG7342	FBgn0038716
P31	3R	19940092	A	ACGACCACAGCGCACCAATTCG	ins:21	0.172	0.344	strelka	upstream_gene_variant	intron	Hs6st	FBgn0038755
P31	3R	24607911	A	AAT	ins:2	0.0816	0.1632	strelka	downstream_gene_variant	intron	mld	FBgn0263490
P31	3R	26385772	GA	G	del:1	0.087	0.174	strelka	intergenic_region	intergenic	intergenic	intergenic
P31	3R	27107158	T	TA	ins:1	0.395	0.79	strelka	upstream_gene_variant	intergenic	intergenic	intergenic
P31	3R	30857395	C	CTTTTTGGCAAAAAAAG	ins:16	0.213	0.426	mutect2,strelka	downstream_gene_variant	intergenic	intergenic	intergenic
P31	3R	30903615	GA	G	del:1	0.121	0.242	strelka	upstream_gene_variant	intergenic	intergenic	intergenic
P31	3R	31324916	GA	G	del:1	0.121	0.242	strelka	intron_variant	intron	CG34347	FBgn0085376
P31	3R	31996853	ACCGTT	A	del:5	0.222	0.444	strelka	upstream_gene_variant	intron	heph	FBgn0011224
P31	4	851125	CA	C	del:1	0.0645	0.129	strelka	upstream_gene_variant	intergenic	intergenic	intergenic
P31	X	992178	CGT	C	del:2	0.148	0.148	strelka	downstream_gene_variant	intergenic	intergenic	intergenic
P31	X	1247265	TTGC	T	del:3	0.148	0.148	strelka	disruptive_inframe_deletion	exon	Atf3	FBgn0028550
P31	X	1585785	CTG	C	del:2	0.238	0.238	strelka	intron_variant	intron	br	FBgn0283451
P31	X	2507299	T	TA	ins:1	0.182	0.182	strelka	upstream_gene_variant	intron	trol	FBgn0267911
P31	X	2529276	G	GA	ins:1	0.182	0.182	strelka	intron_variant	intron	trol	FBgn0267911
P31	X	4081494	TTA	T	del:2	0.25	0.25	strelka	intron_variant	intron	CG43689	FBgn0263772
P31	X	4236614	TA	T	del:1	0.211	0.211	strelka	intergenic_region	intergenic	intergenic	intergenic
P31	X	4249185	TA	T	del:1	0.132	0.132	strelka	upstream_gene_variant	intergenic	intergenic	intergenic
P31	X	4646685	CGT	C	del:2	0.1	0.1	strelka	upstream_gene_variant	intron	HLH4C	FBgn0011277
P31	X	4725469	AAC	A	del:2	0.154	0.154	mutect2	intron_variant	intron	Proc-R	FBgn0029723
P31	X	4804816	AT	A	del:1	0.222	0.222	strelka	5_prime_UTR_variant	exon_1	CG2861	FBgn0029728
P31	X	4906455	G	GA	ins:1	0.231	0.231	strelka	3_prime_UTR_variant	exon_8	CG42594	FBgn0260971
P31	X	6388264	CCA	C	del:2	0.156	0.156	strelka	downstream_gene_variant	intergenic	intergenic	intergenic
P31	X	6626000	AC	A	del:1	0.25	0.25	strelka	intron_variant	intron	pigs	FBgn0029881
P31	X	7036373	CA	C	del:1	0.125	0.125	strelka	upstream_gene_variant	intron	CG12541	FBgn0029930
P31	X	7060916	C	CA	ins:1	0.133	0.133	strelka	intron_variant	intron	CG12541	FBgn0029930
P31	X	7077686	G	GA	ins:1	0.344	0.344	strelka	3_prime_UTR_variant	3UTR	Sxl	FBgn0264270
P31	X	7689869	TTGC	T	del:3	0.15	0.15	strelka	conservative_inframe_deletion	exon_2	CHES-1-like	FBgn0029504
P31	X	8389937	GT	G	del:1	0.179	0.179	strelka	downstream_gene_variant	intergenic	intergenic	intergenic
P31	X	8783267	A	AAT	ins:2	0.182	0.182	strelka	intron_variant	intron	Lim1	FBgn0026411
P31	X	9243263	CT	C	del:1	0.143	0.143	strelka	5_prime_UTR_variant	5UTR	mxc	FBgn0260789
P31	X	9693872	AAG	A	del:2	0.13	0.13	strelka	upstream_gene_variant	intergenic	intergenic	intergenic
P31	X	9931450	T	TA	ins:1	0.222	0.222	strelka	upstream_gene_variant	intergenic	intergenic	intergenic
P31	X	10345342	A	ACACACACG	ins:8	0.176	0.176	strelka	upstream_gene_variant	intron	CG43740	FBgn0263997
P31	X	10361320	CT	C	del:1	0.16	0.16	strelka	intron_variant	intron	l(1)G0289	FBgn0028331
P31	X	10575899	GTTGTTT	G	del:6	0.105	0.105	mutect2	disruptive_inframe_deletion	exon_3	spri	FBgn0085443
P31	X	10694708	CCT	C	del:2	0.2	0.2	strelka	intron_variant	intron	X11Lbeta	FBgn0052677
P31	X	11176170	AAC	A	del:2	0.148	0.148	strelka	intergenic_region	intergenic	intergenic	intergenic
P31	X	11434566	AGT	A	del:2	0.111	0.111	strelka	3_prime_UTR_variant	exon_8	Evi5	FBgn0262740
P31	X	12065437	CTT	C	del:2	0.308	0.308	strelka	upstream_gene_variant	intron	Ten-a	FBgn0267001
P31	X	12518029	CA	C	del:1	0.156	0.156	strelka	3_prime_UTR_variant	3UTR	CG43921	FBgn0264542
P31	X	12582734	CT	C	del:1	0.222	0.222	strelka	5_prime_UTR_variant	5UTR	CG11138	FBgn0030400
P31	X	13001837	CT	C	del:1	0.143	0.143	strelka	downstream_gene_variant	intron	rad	FBgn0265597
P31	X	13025314	C	CA	ins:1	0.172	0.172	strelka	downstream_gene_variant	intron	rad	FBgn0265597
P31	X	13371199	GCA	G	del:2	0.13	0.13	strelka	splice_region_variant	exon_1	CG1640	FBgn0030478
P31	X	13512275	GCA	G	del:2	0.125	0.125	strelka	intron_variant	intron	Neto	FBgn0265416
P31	X	13747308	GCT	G	del:2	0.15	0.15	strelka	upstream_gene_variant	intron	Pdcd4	FBgn0030520
P31	X	13945135	TA	T	del:1	0.16	0.16	strelka	intron_variant	intron	mamo	FBgn0267033
P31	X	14503247	ATTT	A	del:3	0.25	0.25	strelka	intergenic_region	intergenic	intergenic	intergenic
P31	X	15539594	GGGT	G	del:3	0.167	0.167	strelka	5_prime_UTR_variant	5UTR	Ac13E	FBgn0022710
P31	X	15819923	CA	C	del:1	0.12	0.12	strelka	intron_variant	intron	sd	FBgn0003345
P31	X	16102868	AT	A	del:1	0.148	0.148	strelka	5_prime_UTR_variant	exon_2	CG42354	FBgn0259700
P31	X	16638119	GGA	G	del:2	0.1	0.1	strelka	5_prime_UTR_variant	5UTR	RpS19a	FBgn0010412
P31	X	18347975	CGT	C	del:2	0.182	0.182	strelka	intron_variant	intron	CG6123	FBgn0030913
P31	X	18371498	TAC	T	del:2	0.125	0.125	strelka	5_prime_UTR_variant	exon_1	CrebB	FBgn0265784
P31	X	21204705	TG	T	del:1	0.192	0.192	strelka	upstream_gene_variant	intergenic	intergenic	intergenic
P31	X	21488825	AAAG	A	del:3	0.143	0.143	mutect2,strelka	intergenic_region	intergenic	intergenic	intergenic
P31	X	22476927	T	TA	ins:1	0.519	0.519	mutect2,strelka	upstream_gene_variant	intron	CG12576	FBgn0031190
P31	X	23013172	C	CA	ins:1	0.143	0.143	strelka	5_prime_UTR_variant	5UTR	Rab21	FBgn0039966
P31	Y	3623671	CACATGTATGAAA	C	del:12	0.138	0.138	strelka	intergenic_region	intergenic	intergenic	intergenic
P33	2L	3701157	TA	T	del:1	0.261	0.522	strelka	upstream_gene_variant	intergenic	intergenic	intergenic
P33	2L	4193847	CA	C	del:1	0.0732	0.1464	strelka	downstream_gene_variant	intron	CG3714	FBgn0031589
P33	2L	6400113	CAACAAA	C	del:6	0.0312	0.0624	mutect2	upstream_gene_variant	intron	DIP-epsilon	FBgn0259714
P33	2L	7081748	A	AAAT	ins:3	0.105	0.21	strelka	upstream_gene_variant	intron	Pvf2	FBgn0031888
P33	2L	7081755	AAAGAAAACTATTTTTTTTTTTCAAGCCAACG	A	del:31	0.111	0.222	strelka	upstream_gene_variant	intron	Pvf2	FBgn0031888
P33	2L	7644572	C	CG	ins:1	0.0606	0.1212	strelka	frameshift_variant	exon	Slob	FBgn0264087
P33	2L	7663077	GA	G	del:1	0.0862	0.1724	strelka	upstream_gene_variant	intron	Slob	FBgn0264087
P33	2L	9565509	CA	C	del:1	0.18	0.36	strelka	upstream_gene_variant	intron	jp	FBgn0032129
P33	2L	10789934	A	ATTAATCAGCATGAGTT	ins:16	0.229	0.458	strelka	upstream_gene_variant	intron	CG31869	FBgn0051869
P33	2L	11063697	AAAT	A	del:3	0.143	0.286	strelka	intron_variant	intron	Samuel	FBgn0032330
P33	2L	12466569	TG	T	del:1	0.0909	0.1818	strelka	intron_variant	intron	bun	FBgn0259176
P33	2L	12590305	CCGGGGGTAAA	C	del:10	0.222	0.444	strelka	intron_variant	intron	nub	FBgn0085424
P33	2L	12590320	A	AATCAC	ins:5	0.25	0.5	strelka	intron_variant	intron	nub	FBgn0085424
P33	2L	12960242	AAGC	A	del:3	0.0667	0.1334	strelka	intergenic_region	intergenic	intergenic	intergenic
P33	2L	13522211	TG	T	del:1	0.16	0.32	strelka	intron_variant	intron	B4	FBgn0023407
P33	2L	13979529	A	ATTCG	ins:4	0.182	0.364	strelka	3_prime_UTR_variant	3UTR	Cyp28a5	FBgn0028940
P33	2L	13988352	AAAAACAAATTG	A	del:11	0.136	0.272	strelka	intron_variant	intron	rk	FBgn0003255
P33	2L	14084544	CA	C	del:1	0.133	0.266	strelka	intron_variant	intron	nAChRalpha5	FBgn0028875
P33	2L	14300781	TAC	T	del:2	0.127	0.254	strelka	upstream_gene_variant	intron	wb	FBgn0261563
P33	2L	15172341	AAAT	A	del:3	0.0656	0.1312	mutect2	intron_variant	intron	CG4168	FBgn0028888
P33	2L	16523912	C	CTTAAAATCGA	ins:10	0.188	0.376	strelka	upstream_gene_variant	intron	CG5953	FBgn0032587
P33	2L	16547786	GACTTAAACTAAGTAA	G	del:15	0.185	0.37	strelka	downstream_gene_variant	intron	CG42389	FBgn0259735
P33	2L	16874140	A	AT	ins:1	0.117	0.234	strelka	downstream_gene_variant	ncRNA	CR31781	FBgn0051781
P33	2L	18265334	TCTACCGTA	T	del:8	0.174	0.348	strelka	upstream_gene_variant	intron	CG42750	FBgn0261804
P33	2L	18265345	C	CATTTTAAA	ins:8	0.16	0.32	strelka	upstream_gene_variant	intron	CG42750	FBgn0261804
P33	2L	18571570	GT	G	del:1	0.0847	0.1694	strelka	5_prime_UTR_variant	exon_1	Pde11	FBgn0085370
P33	2L	19793719	GGT	G	del:2	0.0833	0.1666	strelka	3_prime_UTR_variant	3UTR	fs(2)ltoPP43	FBgn0004811
P33	2L	21225271	C	CA	ins:1	0.061	0.122	strelka	frameshift_variant	exon_4	CG8677	FBgn0026577
P33	2L	22666117	G	GC	ins:1	0.0694	0.1388	strelka	intron_variant	intron	CG40006	FBgn0058006
P33	2R	1645508	C	CA	ins:1	0.377	0.754	strelka	upstream_gene_variant	intergenic	intergenic	intergenic
P33	2R	1691100	G	GT	ins:1	0.119	0.238	strelka	intron_variant	intron	CG41520	FBgn0087011
P33	2R	2514350	GA	G	del:1	0.0685	0.137	strelka	intron_variant	intron	MFS17	FBgn0058263
P33	2R	6566531	CA	C	del:1	0.0533	0.1066	strelka	intron_variant	intron	jing	FBgn0086655
P33	2R	10090085	CAA	C	del:2	0.038	0.076	mutect2	upstream_gene_variant	intron	CG2269	FBgn0033484
P33	2R	12439327	C	CAGCGGGGATCGG	ins:12	0.217	0.434	strelka	upstream_gene_variant	intron	Dyb	FBgn0033739
P33	2R	13623108	A	ACT	ins:2	0.0862	0.1724	mutect2	5_prime_UTR_variant	exon_1	fas	FBgn0000633
P33	2R	13929547	TTC	T	del:2	0.129	0.258	strelka	upstream_gene_variant	intron	shot	FBgn0013733
P33	2R	14078152	T	TAAAAACCAACACGAAGCCA	ins:19	0.2	0.4	strelka	intron_variant	intron	Prosap	FBgn0040752
P33	2R	14078154	G	GATACAC	ins:6	0.167	0.334	strelka	intron_variant	intron	Prosap	FBgn0040752
P33	2R	14983666	TG	T	del:1	0.0563	0.1126	strelka	downstream_gene_variant	intron	pcs	FBgn0033988
P33	2R	16665637	CA	C	del:1	0.172	0.344	strelka	upstream_gene_variant	intron	Picot	FBgn0024315
P33	2R	16871166	T	TC	ins:1	0.179	0.358	strelka	upstream_gene_variant	intron	CG6426	FBgn0034162
P33	2R	18293557	ATTTGCAAGGGTACGAT	A	del:16	0.121	0.242	strelka	5_prime_UTR_variant	5UTR	CG14502	FBgn0034321
P33	2R	19063008	AATTTGT	A	del:6	0.122	0.244	strelka	upstream_gene_variant	intergenic	intergenic	intergenic
P33	2R	21441461	C	CAG	ins:2	0	0	consensus	intron_variant	intron	Sdc	FBgn0010415
P33	2R	21917049	A	ACAGGAAAAAGCAAGC	ins:15	0.333	0.666	strelka	intron_variant	intron	Fili	FBgn0085397
P33	2R	23001352	CACAA	C	del:4	0.0476	0.0952	mutect2	upstream_gene_variant	intron	twi	FBgn0003900
P33	3L	6520206	C	CTT	ins:2	0.175	0.35	strelka	intron_variant	intron	sfl	FBgn0020251
P33	3L	6929668	TTA	T	del:2	0.0714	0.1428	strelka	upstream_gene_variant	intergenic	intergenic	intergenic
P33	3L	9216989	C	CTACCACTCCTGT	ins:12	0.162	0.324	strelka	downstream_gene_variant	intergenic	intergenic	intergenic
P33	3L	9832069	C	CA	ins:1	0.0325	0.065	strelka	3_prime_UTR_variant	exon_4	CG43897	FBgn0264489
P33	3L	10052444	ATGTATGT	A	del:7	0.179	0.358	strelka	downstream_gene_variant	intron	dpr6	FBgn0040823
P33	3L	10363443	C	CCAACAATAACAACAAGGAACAG	ins:22	0.25	0.5	strelka	upstream_gene_variant	exon_3	CR46006	FBgn0267668
P33	3L	10424192	C	CCA	ins:2	0.0656	0.1312	strelka	intergenic_region	intergenic	intergenic	intergenic
P33	3L	10654176	AAAAAAGCTGCTGAAAACTTTGCGCCATTGCACTTT	A	del:35	0.306	0.612	strelka	intron_variant	intron	CG32066	FBgn0052066
P33	3L	10995048	TG	T	del:1	0.115	0.23	strelka	intron_variant	intron	klu	FBgn0013469
P33	3L	11035432	G	GT	ins:1	0.0806	0.1612	mutect2	downstream_gene_variant	ncRNA	CR44547	FBgn0265740
P33	3L	11109484	T	TTTTTATAATGGTAATGC	ins:17	0.8	1	mutect2	5_prime_UTR_variant	5UTR	CG34012	FBgn0054012
P33	3L	12551257	ATATGTACAATATGTATG	A	del:17	0.237	0.474	strelka	intron_variant	intron	sowah	FBgn0036302
P33	3L	13113526	TC	T	del:1	0.0769	0.1538	strelka	upstream_gene_variant	intergenic	intergenic	intergenic
P33	3L	13177401	CT	C	del:1	0.0571	0.1142	strelka	downstream_gene_variant	intergenic	intergenic	intergenic
P33	3L	13677726	A	AAAAAAAGTATAAGAGACCACATTT	ins:24	0.093	0.186	strelka	intron_variant	intron	bru3	FBgn0264001
P33	3L	14024818	G	GC	ins:1	0	0	consensus	frameshift_variant	exon_4	Ptip	FBgn0052133
P33	3L	15658202	T	TTATTTATATTA	ins:11	0.237	0.474	strelka	upstream_gene_variant	intergenic	intergenic	intergenic
P33	3L	18161906	CGCA	C	del:3	0.143	0.286	strelka	intron_variant	intron	CG13699	FBgn0036781
P33	3L	19918384	AT	A	del:1	0.0746	0.1492	strelka	3_prime_UTR_variant	3UTR	Su(z)12	FBgn0020887
P33	3L	20628503	GA	G	del:1	0.212	0.424	strelka	upstream_gene_variant	intergenic	intergenic	intergenic
P33	3L	24868434	ACT	A	del:2	0.0641	0.1282	strelka	intergenic_region	intergenic	intergenic	intergenic
P33	3R	1847770	C	CA	ins:1	0.0889	0.1778	strelka	intron_variant	intron	Myo81F	FBgn0267431
P33	3R	3030920	CT	C	del:1	0.211	0.422	strelka	intron_variant	intron	Pzl	FBgn0267430
P33	3R	3374183	TAC	T	del:2	0.0921	0.1842	strelka	intergenic_region	intergenic	intergenic	intergenic
P33	3R	3374191	A	AGG	ins:2	0.0909	0.1818	strelka	intergenic_region	intergenic	intergenic	intergenic
P33	3R	3580398	CA	C	del:1	0.082	0.164	strelka	intron_variant	intron	Parp	FBgn0010247
P33	3R	7412139	G	GT	ins:1	0.115	0.23	strelka	downstream_gene_variant	intergenic	intergenic	intergenic
P33	3R	10593529	G	GT	ins:1	0.0952	0.1904	strelka	intron_variant	intron	hth	FBgn0001235
P33	3R	11853452	CA	C	del:1	0.0633	0.1266	strelka	intron_variant	intron	CG6959	FBgn0037956
P33	3R	13056636	CA	C	del:1	0.13	0.26	strelka	3_prime_UTR_variant	3UTR	pic	FBgn0260962
P33	3R	14709862	AG	A	del:1	0.093	0.186	strelka	intron_variant	intron	kibra	FBgn0262127
P33	3R	15175298	GT	G	del:1	0.0952	0.1904	strelka	downstream_gene_variant	intron	Mf	FBgn0038294
P33	3R	17715220	TA	T	del:1	0.0962	0.1924	strelka	upstream_gene_variant	intron	osa	FBgn0261885
P33	3R	17920650	A	AACT	ins:3	0.0784	0.1568	strelka	5_prime_UTR_variant	exon_1	cpo	FBgn0263995
P33	3R	18232693	T	TTGGATAGCAAGA	ins:12	0.244	0.488	strelka	upstream_gene_variant	intergenic	intergenic	intergenic
P33	3R	19290537	A	AT	ins:1	0.0755	0.151	strelka	downstream_gene_variant	intergenic	intergenic	intergenic
P33	3R	19978782	G	GACACAACGAGA	ins:11	0	0	consensus	frameshift_variant	exon	CG31213	FBgn0051213
P33	3R	19978784	G	GC	ins:1	0	0	consensus	frameshift_variant	exon	CG31213	FBgn0051213
P33	3R	21557981	G	GA	ins:1	0.104	0.208	strelka	upstream_gene_variant	intergenic	intergenic	intergenic
P33	3R	22075738	GAT	G	del:2	0.043	0.086	mutect2	upstream_gene_variant	intron	how	FBgn0264491
P33	3R	23650431	AAGCACTAC	A	del:8	0.273	0.546	strelka	intron_variant	intron	CG31145	FBgn0051145
P33	3R	24396803	CTG	C	del:2	0.103	0.206	strelka	3_prime_UTR_variant	3UTR	nAChRalpha1	FBgn0000036
P33	3R	25166179	A	AT	ins:1	0.0909	0.1818	strelka	downstream_gene_variant	intergenic	intergenic	intergenic
P33	3R	26304779	G	GTTGAAAACATTAGGCATA	ins:18	0.303	0.606	strelka	intergenic_region	intergenic	intergenic	intergenic
P33	3R	26433839	T	TTAATGTTGC	ins:9	0.0833	0.1666	strelka	downstream_gene_variant	intergenic	intergenic	intergenic
P33	3R	29651998	C	CA	ins:1	0.238	0.476	strelka	intron_variant	intron	Dop1R2	FBgn0266137
P33	3R	30555752	CA	C	del:1	0.17	0.34	strelka	3_prime_UTR_variant	3UTR	CG34155	FBgn0083991
P33	4	277263	GT	G	del:1	0.0598	0.1196	strelka	upstream_gene_variant	exon_1	CR44023	FBgn0264793
P33	X	995127	TA	T	del:1	0.182	0.182	strelka	downstream_gene_variant	intergenic	intergenic	intergenic
P33	X	1825283	G	GT	ins:1	0.143	0.143	strelka	5_prime_UTR_variant	5UTR	CG42666	FBgn0261548
P33	X	2336466	GGA	G	del:2	0.125	0.125	strelka	upstream_gene_variant	intron	Raf	FBgn0003079
P33	X	2340587	CGT	C	del:2	0.107	0.107	strelka	5_prime_UTR_variant	5UTR	Raf	FBgn0003079
P33	X	2442056	A	AT	ins:1	0.167	0.167	strelka	downstream_gene_variant	intergenic	intergenic	intergenic
P33	X	2538342	GA	G	del:1	0.148	0.148	strelka	intron_variant	intron	trol	FBgn0267911
P33	X	2674814	ACAG	A	del:3	0.267	0.267	strelka	3_prime_UTR_variant	exon_12	sgg	FBgn0003371
[truncated: 2,873 more rows]
