# Supplementary material for: Evolution and genomic signatures of spontaneous somatic mutation in Drosophila intestinal stem cells
Source: HighWire-hosted journal article supplement (doi:10.1101/gr.268441.120), 2021-06-24
Supplement: Supplemental_table_S10.xlsx [file Supplemental_table_S10.xlsx]

## Sheet: germline_snps
Supplemental Table S10				SNP variants between lines called by FreeBayes
				FreeBayes (v1.2.0-dirty) calls of germline SNPs. The genomic position and alteration are noted. All samples that share the polymorphism are listed, as is the number of samples for which it is shared. Of note, two distinct genotypes were used: (1) the F1 progeny of ProsVolia1GAL4 line crossed to a UAS-2XGFP line or (2) a DeltaGal4 lines crossed to UAS-nlsGFP line. Therefore, the "D" samples (Dl-Ga…
chrom	pos	ref	alt	genotype	samples	sharedby
2L	5465	C	A	germline_recurrent	P35, P41, P11, P5, D3, P65, P31, P59, D5, P17, P53, P15, P27, P9, P57, D1, P63, P29, P39, P3, P47, P23, P51, P37, P7, P49, P43, P25, P19, P45a, P55, P33, D7, P61	34
2L	5598	C	G	germline_recurrent	P35, P41, P11, P5, D3, P65, P31, P59, D5, P53, P15, P27, P9, P57, D1, P63, P29, P39, P47, P23, P37, P49, P43, P25, P19, P45a, P55, P33, D7, P61	30
2L	5762	T	C	germline_recurrent	P35, P41, P11, P5, D3, P65, P31, P59, D5, P17, P53, P15, P27, P9, P57, D1, P63, P29, P47, P23, P51, P37, P49, P43, P25, P19, P45a, P55, P33, D7, P61	31
2L	5904	C	A	germline_recurrent	P35, P41, P11, P5, D3, P65, P31, P59, D5, P53, P15, P27, P9, P57, D1, P63, P29, P3, P47, P23, P51, P37, P7, P43, P19, P45a, P55, P33, D7, P61	30
2L	5974	C	T	germline_recurrent	P35, P41, P11, P5, D3, P65, P31, P59, D5, P17, P53, P15, P27, P9, P57, D1, P63, P29, P3, P47, P23, P51, P37, P7, P49, P43, P19, P45a, P55, P33, D7, P61	32
2L	6353	C	T	germline_recurrent	P35, P41, P11, P5, D3, P65, P31, D5, P53, P15, P9, P57, D1, P63, P29, P47, P37, P7, P19, P45a, P33, D7	22
2L	6631	A	G	germline_recurrent	P35, P41, P11, P65, P31, P59, P17, P53, P15, P27, P9, P57, P63, P29, P3, P47, P37, P49, P43, P19, P45a, P55, P33	23
2L	7039	A	T	germline_recurrent	P35, P41, P11, P5, D3, P31, D5, P17, P15, P27, P9, D1, P63, P29, P3, P47, P37, P49, P43, P19, P45a, P33, D7	23
2L	7088	A	T	germline_recurrent	P35, P41, P11, P5, D3, P65, P31, P59, D5, P17, P53, P15, P27, P9, P57, D1, P63, P29, P3, P47, P37, P7, P49, P43, P25, P19, P45a, P33, D7, P61	30
2L	7542	G	T	germline_recurrent	P35, P41, P11, P65, P31, P59, P17, P53, P15, P27, P9, P57, P63, P29, P39, P3, P47, P51, P37, P7, P49, P43, P25, P19, P45a, P55, P33, P61	28
2L	7556	T	C	germline_recurrent	P35, P41, P11, D3, P65, P31, P59, D5, P17, P53, P15, P27, P9, P57, D1, P63, P29, P39, P3, P47, P51, P37, P7, P49, P43, P25, P19, P45a, P55, P33, D7, P61	32
2L	7902	A	G	germline_recurrent	P35, P41, P11, D3, P65, P31, P59, D5, P53, P15, P27, P9, P57, D1, P63, P29, P47, P23, P37, P7, P49, P43, P25, P19, P45a, P55, P33, D7, P61	29
2L	7928	C	T	germline_recurrent	P35, P41, P11, P65, P31, P59, P17, P53, P15, P27, P9, P57, P63, P29, P39, P47, P23, P51, P37, P7, P49, P43, P25, P19, P45a, P55, P33, P61	28
2L	8263	G	A	germline_recurrent	P35, P41, P11, P5, D3, P65, P31, P59, D5, P17, P53, P15, P27, P9, P57, D1, P63, P29, P39, P3, P47, P23, P51, P37, P7, P49, P43, P25, P19, P45a, P55, P33, D7, P61	34
2L	10610	G	T	germline_recurrent	P35, P41, P11, P5, D3, P65, P31, D5, P17, P53, P15, P9, D1, P63, P29, P3, P47, P51, P37, P7, P43, P19, P33, D7	24
2L	10745	T	A	germline_recurrent	P35, P41, P11, P31, P59, P17, P15, P9, P63, P29, P47, P37, P43, P19, P33	15
2L	12275	G	C	germline_recurrent	P35, P41, P11, D3, P65, P31, P59, P17, P53, P15, P27, P9, P57, D1, P63, P29, P47, P23, P51, P37, P7, P49, P43, P25, P19, P45a, P55, P33, D7, P61	30
2L	12460	T	C	germline_recurrent	P35, P41, P11, D3, P65, P31, P59, D5, P17, P53, P15, P27, P9, P57, D1, P63, P29, P39, P47, P23, P51, P37, P7, P49, P43, P25, P19, P45a, P55, P33, D7, P61	32
2L	13048	A	T	germline_recurrent	P35, P41, P11, P5, D3, P65, P31, P59, D5, P17, P53, P15, P9, P1, P57, D1, P63, P29, P3, P47, P23, P51, P37, P7, P49, P43, P25, P19, P45a, P55, P33, D7, P61	33
2L	13247	C	T	germline_recurrent	P35, P41, P11, P5, D3, P65, P31, P59, P17, P53, P15, P27, P9, P57, D1, P63, P29, P47, P51, P37, P49, P43, P19, P45a, P55, P33, D7, P61	28
2L	13638	G	A	germline_recurrent	P35, P41, P11, D3, P31, P59, D5, P53, P15, P27, P9, D1, P63, P29, P47, P23, P37, P49, P43, P19, P45a, P55, P33, D7	24
2L	22141	T	A	germline_recurrent	P35, P41, P11, P5, D3, P65, P31, P59, D5, P53, P15, P27, P9, P57, D1, P63, P29, P3, P47, P23, P51, P37, P7, P49, P43, P25, P19, P45a, P55, P33, D7, P61	32
2L	24050	C	T	germline_recurrent	P35, P41, P11, P5, D3, P65, P31, P59, D5, P17, P53, P15, P27, P9, P57, D1, P63, P29, P47, P23, P51, P37, P7, P49, P43, P25, P19, P45a, P55, P33, D7, P61	32
2L	24302	G	C	germline_recurrent	P35, P41, P11, P5, P65, P31, P59, P17, P53, P15, P27, P9, P57, P63, P29, P39, P47, P51, P37, P49, P43, P19, P45a, P33, P61	25
2L	24439	T	G	germline_recurrent	P35, P41, P11, P5, D3, P65, P31, P59, D5, P17, P53, P15, P27, P9, P1, P57, D1, P63, P29, P39, P47, P23, P37, P7, P49, P43, P25, P19, P45a, P55, P33, D7, P61	33
2L	24710	T	A	germline_recurrent	P35, P41, P11, P5, D3, P65, P31, P59, P17, P53, P15, P9, P1, P57, D1, P63, P29, P47, P37, P7, P49, P43, P19, P45a, P55, P33, D7, P61	28
2L	27181	A	G	germline_recurrent	P35, P41, P11, P5, D3, P65, P31, P59, D5, P17, P53, P15, P27, P9, P57, D1, P63, P29, P39, P47, P23, P51, P37, P7, P49, P43, P25, P19, P45a, P55, P33, D7, P61	33
2L	28813	A	G	germline_recurrent	P35, P41, P11, D3, P65, P31, P59, D5, P17, P53, P15, P27, P9, P57, D1, P63, P29, P47, P37, P7, P49, P43, P25, P19, P45a, P55, P33, D7, P61	29
2L	29147	T	A	germline_recurrent	P35, P41, P11, D3, P65, P31, P59, P53, P15, P27, P9, P57, D1, P63, P29, P47, P51, P37, P7, P49, P43, P19, P45a, P55, P33, P61	26
2L	31003	G	C	germline_recurrent	P35, P41, P11, P5, D3, P65, P31, P59, D5, P17, P53, P15, P27, P9, P57, D1, P63, P29, P47, P23, P51, P37, P7, P49, P43, P25, P19, P45a, P55, P33, D7, P61	32
2L	31950	C	A	germline_recurrent	P35, P41, P11, D3, P65, P31, P59, P17, P53, P15, P27, P9, P57, D1, P63, P29, P39, P3, P47, P23, P51, P37, P7, P49, P43, P25, P19, P45a, P55, P33, P61	31
2L	32124	C	A	germline_recurrent	P35, P41, P11, D3, P65, P31, P59, D5, P17, P53, P15, P27, P9, P57, D1, P63, P29, P39, P47, P23, P51, P37, P7, P49, P43, P25, P19, P45a, P55, P33, D7, P61	32
2L	32425	G	A	germline_recurrent	P35, P41, P11, D3, P65, P31, P59, P53, P15, P27, P9, P57, D1, P63, P29, P39, P3, P47, P23, P51, P37, P7, P49, P43, P25, P19, P45a, P55, P33, P61	30
2L	33256	G	T	germline_recurrent	P35, P41, P11, P5, D3, P65, P31, P59, P17, P53, P15, P27, P9, P57, D1, P63, P29, P39, P3, P47, P51, P37, P7, P49, P43, P25, P19, P45a, P55, P33, D7, P61	32
2L	34143	C	A	germline_recurrent	P35, P41, P11, D3, P65, P31, P59, P17, P53, P15, P27, P9, P57, D1, P63, P29, P39, P47, P23, P51, P37, P7, P49, P43, P25, P19, P45a, P55, P33, P61	30
2L	34190	T	G	germline_recurrent	P35, P41, P11, D3, P65, P31, P59, P17, P53, P15, P27, P9, P57, D1, P63, P29, P39, P47, P23, P51, P37, P7, P49, P43, P25, P19, P45a, P55, P33, P61	30
2L	34345	A	C	germline_recurrent	P35, P41, P11, D3, P65, P31, P59, P17, P53, P15, P27, P9, P57, D1, P63, P29, P39, P47, P23, P51, P37, P7, P49, P43, P25, P19, P45a, P55, P33, P61	30
2L	35460	C	T	germline_recurrent	P35, P41, P11, P5, D3, P31, P15, P27, P9, D1, P63, P3, P37, P49, P43, P19, P33, D7	18
2L	35621	G	T	germline_recurrent	P35, P41, P11, D3, P31, P59, P17, P53, P15, P27, P9, P57, D1, P63, P29, P47, P51, P37, P7, P49, P43, P25, P19, P45a, P55, P33, D7, P61	28
2L	35760	A	C	germline_recurrent	P35, P41, P11, P5, D3, P65, P31, P59, D5, P17, P53, P15, P27, P9, P57, D1, P63, P29, P39, P47, P23, P51, P37, P7, P49, P43, P25, P19, P45a, P55, P33, D7, P61	33
2L	35976	C	T	germline_recurrent	P35, P41, P11, P5, D3, P65, P31, P59, D5, P17, P53, P15, P27, P9, P57, D1, P63, P29, P39, P47, P51, P37, P7, P49, P43, P25, P19, P45a, P55, P33, D7, P61	32
2L	36062	G	A	germline_recurrent	P35, P41, P11, P65, P31, P59, P53, P15, P27, P9, P57, P63, P29, P39, P23, P51, P37, P7, P49, P43, P25, P19, P45a, P55, P33, P61	26
2L	36330	A	T	germline_recurrent	P35, P41, P11, P5, D3, P65, P31, P59, D5, P53, P15, P27, P9, P57, D1, P63, P29, P39, P47, P23, P51, P37, P49, P43, P25, P19, P45a, P55, P33, D7, P61	31
2L	36631	G	A	germline_recurrent	P35, P41, P11, D3, P65, P31, P59, P17, P53, P15, P27, P9, P57, D1, P63, P29, P39, P47, P23, P51, P37, P7, P49, P43, P25, P19, P45a, P55, P33, P61	30
2L	36696	A	C	germline_recurrent	P35, P41, P11, D3, P65, P31, P59, D5, P53, P15, P27, P9, P57, D1, P63, P29, P39, P47, P23, P51, P37, P49, P43, P25, P19, P45a, P55, P33, D7, P61	30
2L	36861	T	G	germline_recurrent	P35, P41, P11, P5, D3, P65, P31, P59, D5, P53, P15, P27, P9, P57, D1, P63, P29, P39, P47, P23, P51, P37, P49, P43, P25, P19, P45a, P55, P33, D7, P61	31
2L	38826	G	A	germline_recurrent	P35, P41, P11, P5, D3, P65, P31, P59, P53, P15, P9, D1, P63, P29, P47, P51, P37, P7, P49, P43, P19, P45a, P33, D7, P61	25
2L	39397	A	C	germline_recurrent	P35, P41, P11, D3, P65, P31, P59, P53, P15, P27, P9, P57, D1, P63, P29, P39, P47, P23, P37, P7, P49, P43, P25, P19, P45a, P55, P33, D7, P61	29
2L	39826	C	T	germline_recurrent	P35, P41, P11, D3, P65, P31, P59, D5, P17, P53, P15, P27, P9, P57, D1, P63, P29, P47, P23, P51, P37, P7, P49, P43, P25, P19, P45a, P55, P33, D7, P61	31
2L	39993	G	T	germline_recurrent	P35, P41, P11, D3, P65, P31, P53, P15, P27, P9, D1, P63, P29, P39, P37, P49, P43, P19, P45a, P55, P33, P61	22
2L	40067	G	C	germline_recurrent	P35, P41, P11, D3, P65, P31, P59, P53, P15, P27, P9, P57, D1, P63, P29, P39, P47, P23, P51, P37, P49, P43, P19, P45a, P55, P33, P61	27
2L	40556	C	T	germline_recurrent	P35, P41, P11, P5, D3, P31, P59, D5, P17, P53, P15, P27, P9, P57, D1, P63, P29, P39, P47, P23, P51, P37, P7, P49, P43, P25, P19, P45a, P55, P33, D7, P61	32
2L	40750	C	T	germline_recurrent	P35, P41, P11, P5, D3, P65, P31, P59, D5, P53, P15, P27, P9, P1, P57, D1, P63, P29, P47, P51, P37, P49, P43, P25, P19, P45a, P33, D7	28
2L	40783	A	T	germline_recurrent	P35, P41, P11, D3, P65, P31, P59, P17, P53, P15, P27, P9, P57, D1, P63, P29, P47, P23, P51, P37, P49, P43, P25, P19, P45a, P55, P33, P61	28
2L	40829	A	G	germline_recurrent	P35, P41, P11, P5, D3, P65, P31, P59, D5, P17, P53, P15, P27, P9, P57, D1, P63, P29, P3, P47, P23, P51, P37, P7, P49, P43, P25, P19, P45a, P55, P33, D7, P61	33
2L	40852	T	C	germline_recurrent	P35, P41, P11, P5, D3, P65, P31, D5, P17, P53, P15, P27, P9, P57, D1, P63, P29, P3, P47, P23, P51, P37, P7, P49, P43, P25, P19, P45a, P55, P33, D7, P61	32
2L	41860	T	G	germline_recurrent	P35, P41, P11, P5, D3, P65, P31, P59, D5, P53, P15, P27, P9, P57, D1, P63, P29, P47, P23, P51, P37, P7, P49, P43, P25, P19, P45a, P55, P33, D7, P61	31
2L	42012	T	G	germline_recurrent	P35, P41, P11, D3, P65, P31, P59, P17, P53, P15, P27, P9, P57, D1, P63, P29, P39, P3, P47, P51, P37, P7, P49, P43, P25, P19, P45a, P55, P33, P61	30
2L	42186	C	G	germline_recurrent	P35, P41, P11, P5, D3, P65, P31, P59, D5, P53, P15, P27, P9, P57, D1, P63, P29, P39, P47, P23, P51, P37, P49, P43, P25, P19, P45a, P55, P33, D7, P61	31
2L	42709	G	A	germline_recurrent	P35, P41, P11, P5, D3, P65, P31, P59, D5, P17, P53, P15, P27, P9, P57, D1, P63, P29, P3, P47, P23, P51, P37, P7, P49, P43, P25, P19, P45a, P55, P33, D7, P61	33
2L	42772	A	C	germline_recurrent	P35, P41, P11, D3, P65, P31, P59, D5, P17, P53, P15, P27, P9, P57, D1, P63, P29, P39, P3, P47, P23, P51, P37, P7, P49, P43, P25, P19, P45a, P55, P33, D7, P61	33
2L	42850	A	T	germline_recurrent	P35, P41, P11, D3, P65, P31, P59, D5, P17, P53, P15, P27, P9, P57, D1, P63, P29, P39, P47, P23, P51, P37, P7, P49, P43, P25, P19, P45a, P55, P33, D7, P61	32
2L	42860	G	A	germline_recurrent	P35, P41, P11, D3, P65, P31, P59, P17, P53, P15, P27, P9, P57, D1, P63, P29, P39, P47, P23, P51, P37, P7, P49, P43, P25, P19, P45a, P55, P33, P61	30
2L	43102	A	G	germline_recurrent	P35, P41, P11, P5, D3, P65, P31, P59, D5, P17, P53, P15, P27, P9, P57, D1, P63, P29, P39, P47, P23, P51, P37, P7, P49, P43, P25, P19, P45a, P55, P33, D7, P61	33
2L	43105	G	T	germline_recurrent	P35, P41, P11, D3, P65, P31, P59, P17, P53, P15, P27, P9, P57, D1, P63, P29, P39, P47, P23, P51, P37, P7, P49, P43, P25, P19, P45a, P55, P33, P61	30
2L	43241	A	G	germline_recurrent	P35, P41, P11, D3, P65, P31, P59, P17, P53, P15, P27, P9, P57, D1, P63, P29, P39, P47, P23, P51, P37, P7, P49, P43, P25, P19, P45a, P55, P33, P61	30
2L	43265	A	G	germline_recurrent	P35, P41, P11, P5, D3, P65, P31, P59, D5, P17, P53, P15, P27, P9, P57, D1, P63, P29, P39, P47, P23, P51, P37, P7, P49, P43, P25, P19, P45a, P55, P33, D7, P61	33
2L	43548	C	T	germline_recurrent	P35, P41, P11, D3, P65, P31, P59, P17, P53, P15, P27, P9, P57, D1, P63, P29, P39, P47, P23, P51, P37, P7, P49, P43, P25, P19, P45a, P55, P33, P61	30
2L	44059	G	A	germline_recurrent	P35, P41, P11, D3, P31, P59, P53, P15, P27, P9, P57, D1, P63, P29, P37, P43, P19, P45a, P33, P61	20
2L	44679	A	T	germline_recurrent	P35, P41, P11, P5, D3, P65, P31, P59, D5, P17, P53, P15, P27, P9, P57, D1, P63, P29, P3, P47, P51, P37, P7, P49, P43, P25, P19, P45a, P55, P33, D7, P61	32
2L	45120	T	A	germline_recurrent	P35, P41, P11, P5, D3, P65, P31, P59, D5, P17, P53, P15, P27, P9, P57, D1, P63, P29, P39, P3, P47, P23, P51, P37, P7, P49, P43, P25, P19, P45a, P55, P33, D7, P61	34
2L	45178	G	A	germline_recurrent	P35, P41, P11, D3, P65, P31, P59, P17, P53, P15, P27, P9, P57, D1, P63, P29, P39, P47, P23, P51, P37, P49, P43, P25, P19, P45a, P55, P33, P61	29
2L	45770	T	A	germline_recurrent	P35, P41, P11, P5, D3, P65, P31, P59, D5, P17, P53, P15, P27, P9, P57, D1, P63, P39, P47, P23, P51, P37, P7, P49, P43, P25, P19, P45a, P55, P33, D7, P61	32
2L	46708	T	A	germline_recurrent	P35, P41, P11, P5, D3, P65, P31, P59, D5, P17, P53, P15, P27, P9, P57, D1, P63, P29, P47, P23, P51, P37, P7, P49, P43, P25, P19, P45a, P55, P33, D7, P61	32
2L	46954	T	C	germline_recurrent	P35, P41, P11, D3, P65, P31, P59, P17, P53, P15, P27, P9, P57, D1, P63, P29, P39, P23, P51, P37, P49, P43, P25, P19, P45a, P55, P33, P61	28
2L	52875	T	C	germline_recurrent	P35, P41, P11, D3, P65, P31, P59, P17, P53, P15, P27, P9, P1, P57, D1, P63, P29, P47, P51, P37, P7, P49, P43, P19, P45a, P55, P33, P61	28
2L	52936	G	A	germline_recurrent	P35, P41, P11, P5, D3, P31, P59, D5, P17, P53, P15, P27, P9, D1, P63, P29, P47, P51, P37, P49, P43, P19, P45a, P33, D7	25
2L	53027	G	T	germline_recurrent	P35, P41, P11, P65, P31, P59, P17, P53, P15, P9, P57, P63, P29, P47, P37, P7, P49, P43, P19, P45a, P33	21
2L	53642	T	C	germline_recurrent	P35, P41, P11, D3, P65, P31, P59, P17, P53, P15, P27, P9, P57, D1, P63, P29, P39, P47, P51, P37, P7, P49, P43, P19, P45a, P55, P33, P61	28
2L	54049	G	T	germline_recurrent	P35, P11, D3, P15, P9, D1	6
2L	54339	T	A	germline_recurrent	P35, P41, P11, P5, D3, P31, P17, P15, P27, P9, D1, P63, P29, P47, P37, P43, P25, P19, P33, D7, P61	21
2L	55774	A	G	germline_recurrent	P35, P41, P11, D3, P65, P31, P59, D5, P17, P53, P15, P27, P9, P57, D1, P63, P29, P39, P47, P23, P51, P37, P49, P43, P25, P19, P45a, P55, P33, D7, P61	31
2L	56423	C	T	germline_recurrent	P35, P41, P11, P5, D3, P65, P31, P59, D5, P17, P53, P15, P27, P9, P57, D1, P63, P29, P39, P47, P23, P51, P37, P7, P49, P43, P25, P19, P45a, P55, P33, D7, P61	33
2L	57088	G	T	germline_recurrent	P35, P41, P11, P5, D3, P31, P59, P17, P53, P15, P9, P57, D1, P63, P29, P47, P51, P37, P43, P19, P45a, P33, D7, P61	24
2L	57096	T	C	germline_recurrent	P35, P41, P11, P5, D3, P31, P59, P53, P15, P9, P57, D1, P63, P29, P47, P37, P7, P43, P19, P45a, P33, D7	22
2L	57256	C	T	germline_recurrent	P35, P41, P11, D3, P65, P31, P59, D5, P17, P53, P15, P27, P9, P57, D1, P63, P29, P47, P51, P37, P7, P49, P43, P19, P45a, P33, D7	27
2L	57790	C	G	germline_recurrent	P35, P41, P11, P5, D3, P31, P59, D5, P17, P53, P15, P27, P9, P1, P57, D1, P63, P29, P37, P7, P49, P43, P25, P19, P45a, P55, P33, D7, P61	29
2L	57810	A	G	germline_recurrent	P35, P41, P11, P5, D3, P65, P31, P59, D5, P17, P53, P15, P27, P9, P1, P57, D1, P63, P29, P37, P49, P43, P25, P19, P45a, P55, P33, D7, P61	29
2L	58166	T	C	germline_recurrent	P35, P41, P11, P5, D3, P65, P31, P59, D5, P17, P53, P15, P27, P9, P57, D1, P63, P29, P39, P47, P23, P51, P37, P49, P43, P25, P19, P45a, P55, P33, D7, P61	32
2L	58825	G	A	germline_recurrent	P35, P41, P11, P5, D3, P65, P31, P59, D5, P17, P53, P15, P27, P9, P57, D1, P63, P29, P39, P47, P23, P51, P37, P7, P49, P43, P25, P19, P45a, P55, P33, D7, P61	33
2L	58858	G	A	germline_recurrent	P35, P41, P11, D3, P65, P31, P59, P17, P53, P15, P27, P9, P57, D1, P63, P29, P39, P3, P47, P51, P37, P7, P49, P43, P25, P19, P45a, P55, P33, P61	30
2L	60927	G	A	germline_recurrent	P35, P41, P11, D3, P65, P31, P59, P17, P53, P15, P27, P9, P57, D1, P63, P29, P3, P47, P23, P51, P37, P7, P49, P43, P25, P19, P45a, P55, P33, P61	30
2L	61165	G	C	germline_recurrent	P35, P41, P11, D3, P31, P59, P53, P15, P27, P9, P1, P57, D1, P63, P29, P47, P37, P49, P43, P19, P45a, P55, P33, P61	24
2L	61450	T	C	germline_recurrent	P35, P41, P11, P5, D3, P65, P31, P59, D5, P17, P53, P15, P27, P9, P57, D1, P63, P29, P47, P23, P51, P37, P7, P49, P43, P25, P19, P45a, P33, D7, P61	31
2L	61593	G	T	germline_recurrent	P35, P41, P11, P5, D3, P31, P59, D5, P17, P53, P15, P9, P1, P57, D1, P63, P29, P47, P37, P43, P25, P19, P45a, P33, D7	25
2L	63513	G	A	germline_recurrent	P35, P41, P11, P5, D3, P31, P59, P15, P9, P1, D1, P63, P29, P37, P43, P45a, P33, D7	18
2L	63575	A	G	germline_recurrent	P35, P41, P11, P5, D3, P65, P31, P59, P17, P53, P15, P9, P1, P57, D1, P63, P37, P7, P43, P19, P45a, P33, D7, P61	24
2L	63707	T	A	germline_recurrent	P35, P41, P11, D3, P65, P31, P59, P53, P15, P27, P9, P1, P57, D1, P63, P29, P3, P47, P23, P51, P37, P7, P49, P43, P25, P19, P45a, P33, P61	29
2L	65405	G	T	germline_recurrent	P35, P41, P11, P5, D3, P65, P31, P59, D5, P17, P53, P15, P27, P9, P57, D1, P63, P29, P3, P47, P23, P51, P37, P49, P43, P25, P19, P45a, P33, D7	30
2L	66898	C	T	germline_recurrent	P35, P41, P11, D3, P65, P31, P59, P17, P53, P15, P27, P9, P57, D1, P63, P29, P39, P47, P23, P51, P37, P7, P49, P43, P25, P19, P45a, P55, P33, P61	30
2L	67241	A	G	germline_recurrent	P35, P41, P11, P5, D3, P65, P31, P59, D5, P17, P53, P15, P27, P9, P1, P57, D1, P63, P29, P47, P23, P37, P7, P49, P43, P25, P19, P45a, P55, P33, D7, P61	32
2L	67497	T	C	germline_recurrent	P35, P41, P11, P5, D3, P65, P31, P59, D5, P53, P15, P27, P9, P1, P57, D1, P63, P29, P47, P23, P51, P37, P7, P49, P43, P25, P19, P45a, P55, P33, D7, P61	32
2L	67841	C	A	germline_recurrent	P35, P41, P11, P65, P31, P59, P17, P53, P15, P27, P9, P57, P63, P29, P47, P51, P37, P7, P49, P43, P25, P19, P45a, P55, P33, P61	26
2L	67877	C	T	germline_recurrent	P35, P41, P11, P5, D3, P65, P31, P59, D5, P17, P53, P15, P27, P9, P57, D1, P63, P29, P3, P47, P23, P51, P37, P7, P49, P43, P25, P19, P45a, P55, P33, D7, P61	33
2L	68395	C	T	germline_recurrent	P35, P41, P11, D3, P65, P31, P59, P17, P53, P15, P27, P9, P57, D1, P63, P29, P39, P47, P51, P37, P7, P49, P43, P25, P19, P45a, P55, P33, P61	29
2L	70596	G	A	germline_recurrent	P35, P41, P11, P5, D3, P65, P31, P59, D5, P53, P15, P27, P9, P1, P57, D1, P63, P29, P3, P47, P51, P37, P7, P49, P43, P25, P19, P45a, P55, P33, D7, P61	32
2L	70661	A	C	germline_recurrent	P35, P41, P11, P5, D3, P65, P31, P59, D5, P53, P15, P27, P9, P1, P57, D1, P63, P29, P47, P51, P37, P7, P49, P43, P25, P19, P45a, P55, P33, D7, P61	31
2L	70874	G	A	germline_recurrent	P35, P41, P11, P5, D3, P31, P17, P53, P15, P27, P9, P57, D1, P63, P29, P47, P51, P37, P49, P43, P19, P45a, P55, P33, D7	25
2L	71001	T	C	germline_recurrent	P35, P41, P11, P5, D3, P65, P31, P59, P17, P15, P27, P9, P57, D1, P63, P29, P47, P37, P49, P43, P19, P45a, P33	23
2L	72395	T	G	germline_recurrent	P35, P41, P11, D3, P65, P31, P59, D5, P17, P53, P15, P27, P9, P57, D1, P63, P29, P47, P51, P37, P7, P49, P43, P25, P19, P45a, P33, D7, P61	29
2L	73786	C	T	germline_recurrent	P35, P41, P11, D3, P31, P59, P53, P15, P27, P9, P57, D1, P63, P29, P47, P51, P37, P49, P43, P25, P19, P45a, P55, P33, P61	25
2L	73974	A	G	germline_recurrent	P35, P41, P11, D3, P65, P31, P59, D5, P53, P15, P27, P9, P57, D1, P63, P29, P39, P47, P51, P37, P49, P43, P25, P19, P45a, P55, P33, D7, P61	29
2L	74485	C	A	germline_recurrent	P35, P41, P11, P5, D3, P65, P31, P59, D5, P17, P53, P15, P27, P9, P57, D1, P63, P29, P3, P47, P51, P37, P7, P49, P43, P25, P19, P45a, P55, P33, D7, P61	32
2L	74875	A	T	germline_recurrent	P35, P41, P11, D3, P65, P31, P59, P53, P15, P27, P9, P57, D1, P63, P29, P3, P23, P51, P37, P7, P49, P43, P19, P45a, P55, P33, P61	27
2L	76231	A	G	germline_recurrent	P35, P41, P11, P65, P31, P59, P53, P15, P9, P63, P29, P47, P37, P43, P19, P45a, P33	17
2L	79460	C	G	germline_recurrent	P35, P41, P11, P5, D3, P65, P31, P59, D5, P17, P53, P15, P27, P9, P57, D1, P63, P29, P47, P51, P37, P7, P49, P43, P25, P19, P45a, P55, P33, D7, P61	31
2L	79597	C	A	germline_recurrent	P35, P41, P11, D3, P65, P31, P59, P17, P53, P15, P27, P9, D1, P63, P29, P51, P37, P49, P43, P19, P45a, P33, P61	23
2L	79657	G	C	germline_recurrent	P35, P41, P11, P5, D3, P65, P31, P59, D5, P17, P53, P15, P27, P9, P57, D1, P63, P29, P51, P37, P49, P43, P19, P45a, P33, D7, P61	27
2L	80705	C	G	germline_recurrent	P35, P41, P11, D3, P65, P31, P59, D5, P53, P15, P27, P9, P57, D1, P63, P29, P47, P23, P51, P37, P49, P43, P25, P19, P45a, P55, P33, D7, P61	29
2L	80900	A	G	germline_recurrent	P35, P41, P11, D3, P65, P31, P59, D5, P17, P53, P15, P27, P9, P57, D1, P63, P29, P39, P47, P23, P51, P37, P7, P49, P43, P25, P19, P45a, P55, P33, D7, P61	32
2L	81435	C	A	germline_recurrent	P35, P41, P11, D3, P65, P31, P59, P17, P53, P15, P27, P9, P57, D1, P63, P29, P39, P47, P23, P51, P37, P7, P49, P43, P25, P19, P45a, P55, P33, P61	30
2L	81696	C	T	germline_recurrent	P35, P41, P11, P5, D3, P65, P31, P59, D5, P17, P53, P15, P9, D1, P63, P29, P47, P37, P7, P49, P43, P19, P45a, P33, D7	25
2L	81752	A	G	germline_recurrent	P35, P41, P11, P5, D3, P65, P31, P59, D5, P17, P15, P27, P9, P57, D1, P63, P29, P3, P47, P51, P37, P7, P43, P45a, P33, D7	26
2L	81785	T	C	germline_recurrent	P35, P41, P11, P5, D3, P31, P59, P17, P15, P9, P1, P57, D1, P63, P29, P47, P51, P37, P7, P43, P45a, P33, D7	23
2L	82119	C	T	germline_recurrent	P35, P41, P11, P5, D3, P65, P31, P59, P17, P53, P15, P27, P9, P57, D1, P63, P29, P39, P3, P47, P23, P51, P37, P7, P49, P43, P25, P19, P45a, P55, P33, D7, P61	33
2L	82782	C	A	germline_recurrent	P35, P11, D3, P65, P31, P59, P15, P9, D1, P63, P29, P47, P37, P19, P33	15
2L	82936	T	A	germline_recurrent	P35, P41, P11, P65, P31, P59, P15, P9, P57, P63, P29, P47, P51, P37, P7, P49, P43, P19, P45a, P33	20
2L	84886	T	G	germline_recurrent	P35, P41, P11, P5, D3, P65, P31, P59, D5, P17, P53, P15, P27, P9, P1, P57, D1, P63, P29, P3, P47, P23, P51, P37, P7, P49, P43, P25, P19, P45a, P55, P33, D7, P61	34
2L	84988	A	T	germline_recurrent	P35, P41, P11, D3, P31, P59, P17, P53, P15, P9, P57, D1, P63, P29, P47, P51, P37, P49, P43, P19, P45a, P33	22
2L	86219	A	C	germline_recurrent	P35, P41, P11, D3, P65, P31, P59, P17, P53, P15, P9, P57, D1, P63, P29, P3, P37, P43, P19, P45a, P55, P33, P61	23
2L	86223	A	G	germline_recurrent	P35, P41, P11, P5, D3, P65, P31, P59, P53, P15, P9, P57, D1, P63, P29, P3, P37, P49, P43, P19, P45a, P55, P33, P61	24
2L	86402	G	T	germline_recurrent	P35, P41, P11, P5, D3, P65, P31, P59, D5, P17, P53, P15, P27, P9, P57, D1, P63, P29, P39, P47, P51, P37, P7, P49, P43, P25, P19, P45a, P55, P33, D7, P61	32
2L	86433	A	G	germline_recurrent	P35, P41, P11, D3, P65, P31, P59, D5, P17, P53, P15, P27, P9, P57, D1, P63, P29, P39, P47, P51, P37, P7, P49, P43, P25, P19, P45a, P55, P33, D7, P61	31
2L	86450	A	C	germline_recurrent	P35, P41, P11, D3, P65, P31, P59, D5, P17, P53, P15, P27, P9, P57, D1, P63, P29, P39, P47, P23, P51, P37, P7, P49, P43, P25, P19, P45a, P55, P33, D7, P61	32
2L	86689	G	A	germline_recurrent	P35, P41, P11, P5, D3, P65, P31, P59, D5, P17, P53, P15, P27, P9, P57, D1, P63, P29, P39, P47, P23, P51, P37, P7, P49, P43, P25, P19, P45a, P55, P33, D7, P61	33
2L	86820	A	G	germline_recurrent	P35, P41, P11, D3, P65, P31, P59, P17, P53, P15, P27, P9, P57, D1, P63, P29, P39, P3, P47, P23, P51, P37, P49, P43, P25, P19, P45a, P55, P33, P61	30
2L	87821	A	C	germline_recurrent	P35, P41, P11, D3, P31, P59, P53, P15, P27, P9, P57, D1, P63, P29, P3, P47, P23, P37, P49, P43, P19, P45a, P55, P33	24
2L	88124	A	G	germline_recurrent	P35, P41, P11, P65, P31, P59, P17, P53, P15, P27, P9, P1, P57, P63, P29, P3, P47, P23, P51, P37, P49, P43, P25, P19, P45a, P55, P33, P61	28
2L	89024	G	C	germline_recurrent	P35, P41, P11, D3, P65, P31, P59, P17, P53, P15, P27, P9, P57, D1, P63, P29, P39, P47, P51, P37, P49, P43, P25, P19, P45a, P55, P33, P61	28
2L	89274	A	T	germline_recurrent	P35, P41, P11, D3, P65, P31, P59, P53, P15, P27, P9, P57, D1, P63, P29, P39, P47, P51, P37, P49, P43, P25, P19, P45a, P55, P33, P61	27
2L	89411	G	T	germline_recurrent	P35, P41, P11, P5, D3, P65, P31, P59, D5, P17, P53, P15, P27, P9, P1, P57, D1, P63, P29, P39, P47, P23, P51, P37, P7, P49, P43, P25, P19, P45a, P55, P33, D7, P61	34
2L	89834	A	G	germline_recurrent	P35, P41, P11, P65, P31, P59, P17, P53, P15, P27, P9, P57, P63, P29, P39, P47, P23, P51, P37, P49, P43, P25, P19, P45a, P55, P33, P61	27
2L	89875	A	G	germline_recurrent	P35, P41, P11, P65, P31, P59, P17, P53, P15, P27, P9, P57, P63, P29, P47, P23, P51, P37, P49, P43, P25, P19, P45a, P55, P33, P61	26
2L	89883	T	C	germline_recurrent	P35, P41, P11, P65, P31, P59, P17, P53, P15, P27, P9, P57, P63, P29, P47, P23, P51, P37, P49, P43, P25, P19, P45a, P55, P33, P61	26
2L	89894	A	G	germline_recurrent	P35, P41, P11, P65, P31, P59, P17, P53, P15, P27, P9, P57, P63, P29, P39, P47, P23, P51, P37, P49, P43, P25, P19, P45a, P55, P33, P61	27
2L	90335	A	T	germline_recurrent	P35, P41, P11, P5, D3, P65, P31, P59, D5, P17, P53, P15, P27, P9, P57, D1, P63, P29, P39, P47, P23, P51, P37, P7, P49, P43, P25, P19, P45a, P55, P33, D7, P61	33
2L	90444	T	C	germline_recurrent	P35, P41, P11, P65, P31, P59, P53, P15, P27, P9, P57, P63, P29, P47, P23, P51, P37, P49, P43, P25, P19, P45a, P55, P33, P61	25
2L	90798	G	C	germline_recurrent	P35, P41, P11, D3, P65, P31, P59, D5, P17, P53, P15, P27, P9, P57, D1, P63, P29, P39, P47, P23, P51, P37, P49, P43, P25, P19, P45a, P55, P33, D7, P61	31
2L	90870	C	T	germline_recurrent	P35, P41, P11, P65, P31, P59, P17, P53, P15, P27, P9, P57, P63, P29, P39, P3, P47, P23, P51, P37, P49, P43, P25, P19, P45a, P55, P33, P61	28
2L	90871	C	A	germline_recurrent	P35, P41, P11, P5, D3, P65, P31, P59, D5, P17, P53, P15, P27, P9, P57, D1, P63, P29, P39, P3, P47, P23, P51, P37, P49, P43, P25, P19, P45a, P55, P33, D7, P61	33
2L	91100	G	A	germline_recurrent	P35, P41, P11, P65, P31, P59, P17, P53, P15, P27, P9, P57, P63, P29, P39, P47, P51, P37, P49, P43, P25, P19, P45a, P55, P33, P61	26
2L	91115	C	T	germline_recurrent	P35, P41, P11, D3, P65, P31, P59, P17, P53, P15, P27, P9, P57, D1, P63, P29, P39, P47, P23, P51, P37, P7, P49, P43, P25, P19, P45a, P55, P33, D7, P61	31
2L	91117	C	G	germline_recurrent	P35, P41, P11, P65, P31, P59, P17, P53, P15, P27, P9, P57, P63, P29, P39, P47, P23, P51, P37, P7, P49, P43, P25, P19, P45a, P55, P33, P61	28
2L	91313	A	C	germline_recurrent	P35, P41, P11, P65, P31, P59, P17, P53, P15, P27, P9, P57, P63, P29, P39, P3, P47, P23, P51, P37, P49, P43, P25, P19, P45a, P55, P33, P61	28
2L	91543	G	C	germline_recurrent	P35, P41, P11, P5, D3, P65, P31, P59, D5, P17, P53, P15, P27, P9, P57, D1, P63, P29, P47, P23, P51, P37, P7, P49, P43, P25, P19, P45a, P55, P33, D7, P61	32
2L	91698	A	C	germline_recurrent	P35, P41, P11, D3, P65, P31, P59, D5, P17, P53, P15, P27, P9, P57, D1, P63, P29, P39, P47, P23, P51, P37, P49, P43, P25, P19, P45a, P55, P33, D7, P61	31
2L	91806	T	G	germline_recurrent	P35, P41, P11, P5, D3, P65, P31, P59, D5, P17, P53, P15, P27, P9, P57, D1, P63, P29, P39, P47, P23, P51, P37, P7, P49, P43, P25, P19, P45a, P55, P33, D7, P61	33
2L	92172	T	C	germline_recurrent	P35, P41, P11, D3, P65, P31, P59, D5, P17, P53, P15, P27, P9, P1, P57, D1, P63, P29, P39, P3, P47, P23, P51, P37, P49, P43, P25, P19, P45a, P55, P33, D7, P61	33
2L	92636	C	A	germline_recurrent	P35, P41, P11, P5, D3, P31, P59, P17, P53, P15, P27, P9, P57, D1, P63, P29, P47, P51, P37, P49, P43, P25, P19, P45a, P55, P33, P61	27
2L	93510	T	G	germline_recurrent	P35, P41, P11, D3, P65, P31, P59, D5, P17, P53, P15, P27, P9, P57, D1, P63, P29, P39, P47, P23, P51, P37, P49, P43, P25, P19, P45a, P55, P33, D7, P61	31
2L	93878	G	C	germline_recurrent	P35, P41, P11, D3, P65, P31, P17, P15, P9, D1, P63, P29, P47, P37, P19, P33	16
2L	95032	C	A	germline_recurrent	P35, P41, P11, P5, D3, P65, P31, P59, D5, P17, P53, P15, P27, P9, P57, D1, P63, P29, P3, P47, P23, P51, P37, P7, P49, P43, P19, P45a, P55, P33, D7, P61	32
2L	95341	C	A	germline_recurrent	P35, P41, P11, D3, P65, P31, P59, D5, P17, P53, P15, P27, P9, P57, D1, P63, P29, P39, P47, P23, P51, P37, P49, P43, P25, P19, P45a, P55, P33, D7, P61	31
2L	97580	G	A	germline_recurrent	P35, P41, P11, P65, P31, P59, P17, P53, P15, P27, P9, P57, P63, P29, P39, P47, P23, P51, P37, P49, P43, P25, P19, P45a, P55, P33, P61	27
2L	97607	T	C	germline_recurrent	P35, P41, P11, D3, P65, P31, P59, D5, P17, P53, P15, P27, P9, P57, D1, P63, P29, P39, P47, P23, P51, P37, P49, P43, P25, P19, P45a, P55, P33, D7, P61	31
2L	97872	T	A	germline_recurrent	P35, P41, P11, D3, P65, P31, P59, D5, P17, P53, P15, P27, P9, P57, D1, P63, P29, P39, P3, P47, P23, P51, P37, P7, P49, P43, P25, P19, P45a, P55, P33, D7, P61	33
2L	100206	A	C	germline_recurrent	P35, P41, P11, P5, D3, P65, P31, P59, D5, P17, P53, P15, P27, P9, P57, D1, P63, P29, P39, P3, P47, P23, P51, P37, P7, P49, P43, P25, P19, P45a, P55, P33, D7, P61	34
2L	101841	T	A	germline_recurrent	P35, P41, P11, P5, D3, P31, P15, P9, D1, P29, P3, P37, P19	13
2L	101951	T	G	germline_recurrent	P35, P41, P11, P5, D3, P65, P31, P59, P17, P15, P9, D1, P29, P3, P47, P37, P7, P43, P19, P45a, P33, D7	22
2L	102295	T	C	germline_recurrent	P35, P41, P11, P65, P31, P59, P53, P15, P27, P9, P57, P63, P29, P47, P23, P51, P37, P49, P43, P25, P19, P45a, P55, P33	24
2L	102319	C	A	germline_recurrent	P35, P41, P11, P65, P31, P59, P17, P53, P15, P27, P9, P1, P57, P63, P29, P3, P47, P23, P51, P37, P7, P49, P43, P25, P19, P45a, P55, P33, P61	29
2L	104207	T	G	germline_recurrent	P35, P41, P11, P5, D3, P65, P31, P59, D5, P15, P27, P9, P1, D1, P63, P29, P3, P47, P51, P37, P7, P49, P43, P19, P45a, P33, D7	27
2L	104249	A	C	germline_recurrent	P35, P41, P11, P5, D3, P65, P31, P59, D5, P17, P15, P27, P9, P1, P57, D1, P63, P29, P39, P47, P51, P37, P7, P49, P43, P19, P45a, P55, P33, D7	30
2L	104288	T	C	germline_recurrent	P35, P41, P11, P5, D3, P65, P31, P59, D5, P17, P53, P15, P27, P9, P1, P57, D1, P63, P29, P39, P47, P51, P37, P7, P49, P43, P19, P45a, P55, P33, D7	31
2L	104361	T	C	germline_recurrent	P35, P41, P11, D3, P31, P59, D5, P17, P53, P15, P27, P9, P57, D1, P63, P29, P39, P47, P51, P37, P49, P43, P19, P45a, P55, P33, D7, P61	28
2L	104515	T	G	germline_recurrent	P35, P41, P11, P5, D3, P65, P31, P59, D5, P17, P53, P15, P27, P9, P57, D1, P63, P29, P39, P47, P23, P51, P37, P7, P49, P43, P25, P19, P45a, P55, P33, D7, P61	33
2L	106253	T	C	germline_recurrent	P35, P41, P11, P5, D3, P65, P31, P59, D5, P17, P53, P15, P27, P9, P57, D1, P63, P29, P39, P47, P23, P51, P37, P7, P49, P43, P25, P19, P45a, P55, P33, D7, P61	33
2L	106766	G	A	germline_recurrent	P35, P41, P11, D3, P65, P31, P59, D5, P17, P53, P15, P27, P9, P57, D1, P63, P29, P39, P47, P51, P37, P49, P43, P25, P19, P45a, P55, P33, D7, P61	30
2L	106859	A	G	germline_recurrent	P35, P41, P11, P5, D3, P65, P31, P59, P53, P15, P27, P9, D1, P63, P29, P3, P47, P51, P37, P7, P49, P43, P19, P45a, P33, D7	26
2L	107157	G	T	germline_recurrent	P35, P41, P11, P5, D3, P65, P31, P59, D5, P53, P15, P27, P9, P57, D1, P63, P29, P37, P7, P49, P43, P25, P19, P45a, P55, P33, D7, P61	28
2L	107389	C	T	germline_recurrent	P35, P41, P11, P5, D3, P65, P31, P59, D5, P17, P53, P15, P27, P9, P57, D1, P63, P29, P3, P47, P23, P51, P37, P7, P49, P43, P25, P19, P45a, P55, P33, D7, P61	33
2L	107813	T	A	germline_recurrent	P35, P41, P11, D3, P65, P31, P59, D5, P17, P53, P15, P27, P9, P57, D1, P63, P29, P39, P47, P51, P37, P7, P49, P43, P25, P19, P45a, P55, P33, D7, P61	31
2L	107951	G	C	germline_recurrent	P35, P41, P11, D3, P65, P31, P59, D5, P17, P53, P15, P27, P9, P57, D1, P63, P29, P39, P47, P23, P51, P37, P49, P43, P25, P19, P45a, P55, P33, D7, P61	31
2L	108547	A	G	germline_recurrent	P35, P41, P11, P5, D3, P65, P31, P59, D5, P53, P15, P27, P9, P57, D1, P63, P29, P39, P47, P23, P37, P49, P43, P25, P19, P45a, P55, P33, D7, P61	30
2L	108968	C	A	germline_recurrent	P35, P41, P11, P5, D3, P65, P31, P59, D5, P17, P53, P15, P27, P9, P57, D1, P63, P29, P39, P47, P23, P51, P37, P49, P43, P25, P19, P45a, P55, P33, D7, P61	32
2L	109015	A	T	germline_recurrent	P35, P41, P11, P5, D3, P65, P31, P59, D5, P17, P53, P15, P27, P9, P57, D1, P63, P29, P39, P47, P23, P51, P37, P49, P43, P25, P19, P45a, P55, P33, D7, P61	32
2L	109048	C	T	germline_recurrent	P35, P41, P11, P5, D3, P65, P31, P59, D5, P17, P53, P15, P27, P9, P57, D1, P63, P29, P39, P3, P47, P23, P51, P37, P7, P49, P43, P25, P19, P45a, P55, P33, D7, P61	34
2L	109090	T	A	germline_recurrent	P35, P41, P11, P65, P31, P59, P17, P53, P15, P27, P9, P57, P63, P29, P39, P3, P47, P23, P51, P37, P7, P49, P43, P25, P19, P45a, P55, P33, P61	29
2L	109562	C	G	germline_recurrent	P35, P41, P11, P5, D3, P65, P31, P59, D5, P17, P53, P15, P27, P9, P57, D1, P63, P29, P39, P47, P23, P51, P37, P49, P43, P25, P19, P45a, P55, P33, D7, P61	32
2L	110212	T	G	germline_recurrent	P35, P41, P11, P5, D3, P65, P31, P59, D5, P17, P53, P15, P27, P9, P57, D1, P63, P29, P39, P3, P47, P23, P51, P37, P7, P49, P43, P25, P19, P45a, P55, P33, D7, P61	34
2L	110539	A	G	germline_recurrent	P35, P41, P11, P5, D3, P65, P31, P59, D5, P17, P53, P15, P27, P9, P57, D1, P63, P29, P39, P3, P47, P51, P37, P7, P49, P43, P25, P19, P45a, P55, P33, D7, P61	33
2L	111262	A	G	germline_recurrent	P35, P41, P11, P5, D3, P65, P31, P59, D5, P17, P53, P15, P27, P9, P1, P57, D1, P63, P29, P39, P47, P23, P51, P37, P7, P49, P43, P25, P19, P45a, P55, P33, D7, P61	34
2L	111525	T	C	germline_recurrent	P35, P41, P11, P5, D3, P31, P59, D5, P17, P53, P15, P27, P9, P57, D1, P63, P29, P3, P47, P23, P37, P7, P49, P43, P25, P19, P45a, P55, P33, D7, P61	31
2L	113415	T	G	germline_recurrent	P35, P41, P11, P5, D3, P65, P31, P59, D5, P17, P53, P15, P27, P9, P1, P57, D1, P63, P29, P39, P3, P47, P51, P37, P7, P49, P43, P25, P19, P45a, P55, P33, D7	33
2L	113831	A	T	germline_recurrent	P35, P41, P11, P5, D3, P65, P31, P59, D5, P53, P15, P27, P9, P57, D1, P63, P29, P39, P47, P23, P51, P37, P7, P49, P43, P25, P19, P45a, P55, P33, D7, P61	32
2L	113920	A	C	germline_recurrent	P35, P41, P11, P65, P31, P59, P17, P53, P15, P27, P9, P57, P63, P29, P39, P47, P23, P37, P7, P49, P43, P25, P19, P45a, P55, P33, P61	27
2L	114004	T	A	germline_recurrent	P35, P41, P11, P5, D3, P65, P31, P59, D5, P17, P53, P15, P27, P9, P57, D1, P63, P29, P47, P23, P51, P37, P49, P43, P25, P19, P45a, P55, P33, D7, P61	31
2L	114738	G	T	germline_recurrent	P35, P41, P11, D3, P65, P31, P59, D5, P17, P53, P15, P27, P9, P57, D1, P63, P29, P47, P23, P37, P49, P43, P25, P19, P45a, P33, D7, P61	28
2L	114862	A	G	germline_recurrent	P35, P41, P11, P5, D3, P65, P31, P59, D5, P17, P53, P15, P27, P9, P1, P57, D1, P63, P29, P39, P3, P47, P23, P51, P37, P49, P43, P25, P19, P45a, P55, P33, D7, P61	34
2L	115195	A	T	germline_recurrent	P35, P41, P11, P5, D3, P65, P31, P59, D5, P17, P53, P15, P27, P9, P1, P57, D1, P63, P29, P47, P37, P7, P49, P43, P19, P45a, P33, D7	28
2L	115359	A	G	germline_recurrent	P35, P41, P11, P5, D3, P65, P31, P59, P17, P53, P15, P27, P9, P57, D1, P63, P29, P39, P47, P51, P37, P49, P43, P19, P45a, P55, P33, D7, P61	29
2L	115754	C	G	germline_recurrent	P35, P41, P11, D3, P65, P31, P59, D5, P17, P53, P15, P27, P9, P57, D1, P63, P29, P39, P47, P23, P51, P37, P7, P49, P43, P25, P19, P45a, P55, P33, D7, P61	32
2L	116032	C	T	germline_recurrent	P35, P41, P11, P5, D3, P65, P31, P59, D5, P17, P53, P15, P27, P9, P57, D1, P63, P29, P39, P47, P23, P51, P37, P7, P49, P43, P25, P19, P45a, P55, P33, D7, P61	33
2L	116183	A	T	germline_recurrent	P35, P41, P11, P5, D3, P65, P31, P59, D5, P17, P53, P15, P27, P9, P57, D1, P63, P29, P47, P23, P37, P7, P49, P43, P25, P19, P45a, P55, P33, D7, P61	31
2L	116354	A	C	germline_recurrent	P35, P41, P11, P5, D3, P65, P31, P59, P17, P53, P15, P27, P9, P57, D1, P63, P29, P39, P47, P23, P51, P37, P49, P43, P25, P19, P45a, P55, P33, D7, P61	31
2L	116857	T	G	germline_recurrent	P35, P41, P11, P5, D3, P65, P31, P59, D5, P17, P15, P27, P9, D1, P63, P29, P47, P23, P37, P7, P43, P19, P45a, P55, P33, D7	26
2L	116887	A	G	germline_recurrent	P35, P41, P11, P5, D3, P65, P31, P59, P17, P53, P15, P27, P9, D1, P63, P29, P47, P23, P51, P37, P43, P19, P45a, P33, D7, P61	26
2L	116906	G	A	germline_recurrent	P35, P41, P11, P5, D3, P65, P31, P59, D5, P17, P53, P15, P27, P9, P57, D1, P63, P29, P47, P23, P51, P37, P49, P43, P19, P45a, P33, D7, P61	29
2L	116946	T	G	germline_recurrent	P35, P41, P11, P5, D3, P31, P59, P53, P15, P27, P9, D1, P63, P29, P47, P51, P37, P49, P43, P19, P45a, P33, D7	23
2L	117028	A	G	germline_recurrent	P35, P11, P5, D3, P31, P17, P15, D1, P63, P29, P47, P37, P43, P19, P33	15
2L	117038	C	G	germline_recurrent	P35, P11, P31, P17, P15, P63, P29, P47, P37, P43, P19, P33	12
2L	117526	C	T	germline_recurrent	P35, P41, P11, P5, D3, P65, P31, P59, D5, P53, P15, P27, P9, P57, D1, P63, P29, P39, P3, P47, P23, P51, P37, P7, P49, P43, P25, P19, P45a, P55, P33, D7, P61	33
2L	117901	G	A	germline_recurrent	P35, P41, P11, P65, P31, P59, P17, P53, P15, P27, P9, P57, P63, P29, P3, P47, P23, P51, P37, P7, P49, P43, P25, P19, P45a, P55, P33, P61	28
2L	118851	G	A	germline_recurrent	P35, P41, P11, P5, D3, P65, P31, P59, D5, P17, P53, P15, P27, P9, P57, D1, P63, P29, P39, P47, P23, P51, P37, P49, P43, P25, P19, P45a, P55, P33, D7, P61	32
2L	119610	G	T	germline_recurrent	P35, P41, P11, P5, D3, P65, P31, P59, D5, P53, P15, P27, P9, P1, P57, D1, P63, P29, P47, P37, P49, P43, P25, P19, P45a, P55, P33, D7, P61	29
2L	120025	G	T	germline_recurrent	P35, P41, P11, P65, P31, P59, P53, P15, P27, P9, P57, P63, P29, P39, P47, P23, P51, P37, P49, P43, P25, P19, P45a, P55, P33, P61	26
2L	120530	T	C	germline_recurrent	P35, P41, P11, P5, D3, P65, P31, P59, D5, P17, P53, P15, P27, P9, P57, D1, P63, P29, P39, P47, P51, P37, P7, P49, P43, P25, P19, P45a, P55, P33, D7, P61	32
2L	120995	C	T	germline_recurrent	P35, P41, P11, D3, P65, P31, P59, D5, P17, P53, P15, P27, P9, P57, D1, P63, P29, P39, P3, P47, P23, P51, P37, P7, P49, P43, P25, P19, P45a, P55, P33, D7, P61	33
2L	121830	G	A	germline_recurrent	P35, P41, P11, D3, P65, P31, P59, D5, P17, P53, P15, P27, P9, P57, D1, P63, P29, P39, P3, P47, P23, P51, P37, P7, P49, P43, P25, P19, P45a, P55, P33, D7, P61	33
2L	122084	T	A	germline_recurrent	P35, P41, P11, P65, P31, P59, P17, P53, P15, P27, P9, P57, P63, P29, P39, P3, P47, P51, P37, P7, P49, P43, P19, P45a, P55, P33, P61	27
2L	122128	T	C	germline_recurrent	P35, P41, P11, P5, D3, P65, P31, P59, D5, P17, P53, P15, P27, P9, P57, D1, P63, P29, P39, P3, P47, P51, P37, P49, P43, P19, P55, P33, D7, P61	30
2L	122484	T	C	germline_recurrent	P35, P41, P11, P65, P31, P59, P53, P15, P27, P9, P57, P63, P29, P47, P51, P37, P49, P43, P25, P19, P45a, P33, P61	23
2L	123242	C	T	germline_recurrent	P35, P41, P11, P65, P31, P59, P53, P15, P27, P9, P57, P63, P29, P47, P23, P51, P37, P49, P43, P25, P19, P45a, P55, P33	24
2L	123259	G	A	germline_recurrent	P35, P41, P11, D3, P65, P31, P59, P17, P53, P15, P27, P9, P57, D1, P63, P29, P47, P23, P51, P37, P49, P43, P25, P19, P45a, P55, P33, P61	28
2L	123591	A	G	germline_recurrent	P35, P41, P11, P5, D3, P65, P31, P59, D5, P17, P53, P15, P27, P9, P57, D1, P63, P29, P39, P47, P23, P51, P37, P7, P49, P43, P25, P19, P45a, P55, P33, D7, P61	33
2L	123635	A	G	germline_recurrent	P35, P41, P11, P65, P31, P59, P53, P15, P27, P9, P57, P63, P29, P23, P51, P37, P7, P49, P43, P25, P19, P45a, P55, P33, P61	25
2L	123820	A	C	germline_recurrent	P35, P41, P11, P5, D3, P65, P31, P59, P17, P53, P15, P27, P9, P57, D1, P63, P29, P39, P3, P47, P51, P37, P49, P43, P25, P19, P45a, P55, P33, D7, P61	31
2L	126347	T	C	germline_recurrent	P35, P41, P11, P5, D3, P65, P31, P59, D5, P17, P53, P15, P27, P9, P57, D1, P63, P29, P39, P47, P23, P51, P37, P49, P43, P25, P19, P45a, P55, P33, D7, P61	32
2L	126531	G	A	germline_recurrent	P35, P41, P11, P5, D3, P65, P31, P59, D5, P17, P53, P15, P27, P9, P57, D1, P63, P29, P39, P3, P47, P23, P51, P37, P7, P49, P43, P25, P19, P45a, P55, P33, D7, P61	34
2L	126875	A	G	germline_recurrent	P35, P41, P11, P5, D3, P65, P31, P59, D5, P17, P53, P15, P27, P9, P57, D1, P63, P29, P39, P3, P47, P51, P37, P7, P49, P43, P25, P19, P45a, P55, P33, D7, P61	33
2L	127299	C	A	germline_recurrent	P35, P41, P11, P5, D3, P65, P31, P59, D5, P53, P15, P27, P9, P57, D1, P63, P29, P47, P23, P51, P37, P49, P43, P25, P19, P45a, P55, P33, D7, P61	30
2L	127497	C	T	germline_recurrent	P35, P41, P11, P5, D3, P65, P31, P59, D5, P53, P15, P27, P9, P57, D1, P63, P29, P39, P47, P51, P37, P7, P49, P43, P25, P19, P45a, P55, P33, D7, P61	31
2L	127805	A	T	germline_recurrent	P35, P41, P11, D3, P65, P31, P59, D5, P17, P53, P15, P27, P9, P57, D1, P63, P29, P47, P23, P51, P37, P7, P49, P43, P25, P19, P45a, P55, P33, D7, P61	31
2L	128199	C	A	germline_recurrent	P35, P41, P11, D3, P65, P31, P59, D5, P17, P53, P15, P27, P9, P57, D1, P63, P29, P39, P47, P51, P37, P49, P43, P25, P19, P45a, P55, P33, D7, P61	30
2L	128233	A	T	germline_recurrent	P35, P41, P11, P65, P31, P59, P53, P15, P27, P9, P57, P63, P29, P39, P47, P23, P51, P37, P49, P43, P25, P19, P45a, P55, P33, P61	26
2L	129319	A	G	germline_recurrent	P35, P41, P11, D3, P65, P31, P59, D5, P53, P15, P27, P9, P57, D1, P63, P29, P39, P23, P51, P37, P49, P43, P25, P19, P45a, P55, P33, D7, P61	29
2L	129720	A	C	germline_recurrent	P35, P41, P11, P5, D3, P65, P31, P59, D5, P17, P53, P15, P27, P9, P1, P57, D1, P63, P29, P39, P3, P47, P23, P51, P37, P7, P49, P43, P25, P19, P45a, P55, P33, D7, P61	35
2L	130033	G	A	germline_recurrent	P35, P41, P11, P5, D3, P65, P31, P59, D5, P17, P53, P15, P27, P9, P1, P57, D1, P63, P29, P39, P47, P23, P51, P37, P7, P49, P43, P25, P19, P45a, P55, P33, D7, P61	34
2L	130303	G	T	germline_recurrent	P35, P41, P11, P5, D3, P65, P31, P59, D5, P53, P15, P27, P9, P57, D1, P63, P29, P39, P47, P23, P51, P37, P7, P49, P43, P25, P19, P45a, P55, P33, D7, P61	32
2L	130431	C	G	germline_recurrent	P35, P41, P11, P5, D3, P65, P31, P59, D5, P17, P53, P15, P27, P9, P57, D1, P63, P29, P39, P47, P23, P51, P37, P7, P49, P43, P25, P19, P45a, P55, P33, D7, P61	33
2L	131023	T	G	germline_recurrent	P35, P41, P11, P5, D3, P65, P31, P59, P17, P53, P15, P27, P9, P1, P57, D1, P63, P29, P3, P47, P23, P51, P37, P7, P49, P43, P25, P19, P45a, P55, P33, D7, P61	33
2L	132036	A	G	germline_recurrent	P35, P41, P11, D3, P65, P31, P59, D5, P17, P53, P15, P27, P9, P57, D1, P63, P29, P47, P23, P51, P37, P7, P49, P43, P25, P19, P45a, P55, P33, D7, P61	31
2L	132420	C	G	germline_recurrent	P35, P41, P11, P5, D3, P65, P31, D5, P17, P53, P15, P27, P9, P57, D1, P63, P29, P47, P23, P51, P37, P7, P49, P43, P25, P19, P45a, P55, P33, D7, P61	31
2L	132590	G	A	germline_recurrent	P35, P41, P11, P5, D3, P65, P31, P59, D5, P53, P15, P27, P9, P57, D1, P63, P29, P39, P47, P23, P51, P37, P7, P49, P43, P25, P19, P45a, P55, P33, D7, P61	32
2L	133232	A	C	germline_recurrent	P35, P41, P11, P65, P31, P59, P17, P53, P15, P27, P9, P57, P63, P29, P39, P47, P23, P51, P37, P7, P49, P43, P25, P19, P45a, P55, P33, P61	28
2L	134664	G	C	germline_recurrent	P35, P41, P11, P5, D3, P65, P31, P59, D5, P17, P53, P15, P27, P9, P57, D1, P63, P29, P39, P3, P47, P23, P51, P37, P7, P49, P43, P25, P19, P45a, P55, P33, D7, P61	34
2L	134871	G	A	germline_recurrent	P35, P41, P11, P5, D3, P65, P31, P17, P15, P27, P9, D1, P29, P3, P23, P37, P49, P43, P25, P19, P45a, P33, D7, P61	24
2L	135084	T	A	germline_recurrent	P35, P41, P11, D3, P65, P31, P59, D5, P53, P15, P27, P9, P57, D1, P63, P29, P3, P47, P37, P49, P43, P19, P45a, P33, D7	25
2L	135299	A	G	germline_recurrent	P35, P41, P11, P65, P31, P59, P17, P53, P15, P27, P9, P57, P63, P29, P47, P23, P37, P7, P49, P43, P25, P19, P45a, P55, P33, P61	26
2L	135422	A	G	germline_recurrent	P35, P41, P11, P5, D3, P65, P31, P59, D5, P17, P53, P15, P27, P9, P57, D1, P63, P29, P3, P47, P51, P37, P7, P49, P43, P19, P45a, P55, P33, D7, P61	31
2L	135844	C	A	germline_recurrent	P35, P41, P11, D3, P65, P31, P59, D5, P17, P53, P15, P27, P9, P57, D1, P63, P29, P39, P3, P47, P23, P51, P37, P7, P49, P43, P25, P19, P45a, P55, P33, D7, P61	33
2L	135931	A	G	germline_recurrent	P35, P41, P11, D3, P65, P31, P59, D5, P53, P15, P27, P9, P57, D1, P63, P29, P47, P23, P51, P37, P7, P49, P43, P25, P19, P45a, P55, P33, D7, P61	30
2L	136169	T	A	germline_recurrent	P35, P41, P11, P5, D3, P65, P31, P59, D5, P53, P15, P27, P9, P57, D1, P63, P29, P39, P3, P47, P23, P37, P7, P49, P43, P25, P19, P45a, P55, P33, D7, P61	32
2L	136475	T	C	germline_recurrent	P35, P41, P11, P5, D3, P65, P31, P59, D5, P53, P15, P27, P9, P1, P57, D1, P63, P29, P39, P47, P23, P51, P37, P49, P43, P25, P19, P45a, P55, P33, D7, P61	32
2L	136655	G	A	germline_recurrent	P35, P41, P11, P5, D3, P65, P31, P59, D5, P17, P53, P15, P27, P9, P57, D1, P63, P29, P47, P23, P37, P49, P43, P19, P45a, P55, P33, D7, P61	29
2L	137303	G	A	germline_recurrent	P35, P41, P11, P5, D3, P65, P31, P59, D5, P17, P53, P15, P27, P9, P57, D1, P63, P29, P39, P47, P23, P51, P37, P7, P49, P43, P25, P19, P45a, P55, P33, D7, P61	33
2L	138313	T	C	germline_recurrent	P35, P41, P11, P5, D3, P65, P31, P59, D5, P17, P53, P15, P27, P9, P57, D1, P63, P29, P47, P37, P7, P43, P25, P19, P45a, P33, D7	27
2L	138350	A	G	germline_recurrent	P35, P41, P11, P5, D3, P65, P31, P59, P17, P53, P15, P9, P57, D1, P63, P29, P3, P47, P51, P37, P7, P49, P43, P25, P19, P45a, P33, D7	28
2L	138936	T	C	germline_recurrent	P35, P41, P11, D3, P65, P31, P59, D5, P17, P53, P15, P27, P9, P57, D1, P63, P29, P39, P47, P23, P51, P37, P7, P49, P43, P25, P19, P45a, P55, P33, D7, P61	32
2L	139376	T	C	germline_recurrent	P35, P41, P11, P5, D3, P65, P31, P59, D5, P53, P15, P27, P9, P57, D1, P63, P29, P39, P47, P23, P51, P37, P49, P43, P25, P19, P45a, P55, P33, D7, P61	31
2L	139426	G	T	germline_recurrent	P35, P41, P11, P5, D3, P65, P31, P59, D5, P17, P53, P15, P27, P9, P57, D1, P63, P29, P39, P47, P23, P51, P37, P7, P49, P43, P25, P19, P45a, P55, P33, D7, P61	33
2L	139579	C	G	germline_recurrent	P35, P41, P11, P5, D3, P65, P31, P59, D5, P17, P53, P15, P27, P9, P57, D1, P63, P29, P39, P47, P23, P51, P37, P7, P49, P43, P25, P19, P45a, P55, P33, D7, P61	33
2L	140315	C	A	germline_recurrent	P35, P41, P11, P65, P31, P59, P17, P53, P15, P27, P9, P57, P63, P29, P39, P47, P23, P51, P37, P7, P49, P43, P25, P19, P45a, P55, P33, P61	28
2L	140689	T	C	germline_recurrent	P35, P41, P11, D3, P65, P31, P59, D5, P53, P15, P27, P9, P57, D1, P63, P29, P39, P47, P23, P51, P37, P7, P49, P43, P25, P19, P45a, P55, P33, D7, P61	31
2L	140855	T	A	germline_recurrent	P35, P41, P11, D3, P65, P31, P59, D5, P53, P15, P27, P9, P57, D1, P63, P29, P39, P47, P23, P51, P37, P7, P49, P43, P25, P19, P45a, P55, P33, D7, P61	31
2L	141836	A	G	germline_recurrent	P35, P41, P11, P5, D3, P65, P31, P59, D5, P17, P53, P15, P27, P9, P57, D1, P63, P29, P39, P3, P23, P51, P37, P7, P49, P43, P25, P19, P45a, P55, P33, D7, P61	33
2L	143327	C	T	germline_recurrent	P35, P41, P11, D3, P65, P31, P59, D5, P53, P15, P27, P9, P57, D1, P63, P29, P39, P47, P23, P51, P37, P49, P43, P25, P19, P45a, P55, P33, D7, P61	30
2L	143602	G	C	germline_recurrent	P35, P41, P11, P5, D3, P65, P31, P59, D5, P53, P15, P27, P9, P57, D1, P63, P29, P39, P47, P23, P51, P37, P7, P49, P43, P25, P19, P45a, P55, P33, D7, P61	32
2L	143758	A	G	germline_recurrent	P35, P41, P11, P5, D3, P65, P31, P59, D5, P53, P15, P27, P9, P57, D1, P63, P29, P39, P47, P23, P51, P37, P7, P49, P43, P25, P19, P45a, P55, P33, D7, P61	32
2L	143908	A	C	germline_recurrent	P35, P41, P11, D3, P65, P31, P59, D5, P17, P53, P15, P27, P9, P57, D1, P63, P29, P39, P47, P23, P51, P37, P7, P49, P43, P25, P19, P45a, P55, P33, D7, P61	32
2L	144125	C	G	germline_recurrent	P35, P41, P11, P5, D3, P65, P31, P59, D5, P17, P53, P15, P27, P9, P57, D1, P63, P29, P47, P23, P51, P37, P7, P49, P43, P25, P19, P45a, P55, P33, D7, P61	32
2L	144142	C	T	germline_recurrent	P35, P41, P11, P5, D3, P65, P31, P59, D5, P17, P53, P15, P27, P9, P57, D1, P63, P29, P39, P47, P23, P51, P37, P7, P49, P43, P25, P19, P45a, P55, P33, D7, P61	33
2L	144186	G	T	germline_recurrent	P35, P41, P11, P65, P31, P59, P17, P53, P15, P27, P9, P57, P63, P29, P39, P3, P47, P51, P37, P7, P49, P43, P25, P19, P45a, P55, P33, P61	28
2L	144188	T	G	germline_recurrent	P35, P41, P11, P5, D3, P65, P31, P59, D5, P17, P53, P15, P27, P9, P57, D1, P63, P29, P39, P3, P47, P51, P37, P7, P49, P43, P25, P19, P45a, P55, P33, D7, P61	33
2L	145999	T	A	germline_recurrent	P35, P41, P11, P5, D3, P65, P31, P59, D5, P17, P53, P15, P27, P9, P57, D1, P63, P29, P39, P3, P23, P51, P37, P7, P49, P43, P25, P19, P45a, P55, P33, D7, P61	33
2L	146252	G	C	germline_recurrent	P35, P41, P11, P65, P31, P59, P53, P15, P27, P9, P57, P63, P29, P39, P47, P23, P51, P37, P7, P49, P43, P25, P19, P45a, P55, P33, P61	27
2L	146768	T	G	germline_recurrent	P35, P41, P11, D3, P65, P31, P59, D5, P17, P53, P15, P27, P9, P57, D1, P63, P29, P39, P47, P51, P37, P7, P49, P43, P19, P45a, P55, P33, D7, P61	30
2L	146927	C	T	germline_recurrent	P35, P41, P11, P5, D3, P65, P31, P59, D5, P17, P53, P15, P27, P9, P57, D1, P63, P29, P39, P47, P23, P51, P37, P7, P49, P43, P25, P19, P45a, P55, P33, D7, P61	33
2L	146987	G	A	germline_recurrent	P35, P41, P11, P5, D3, P65, P31, P59, D5, P17, P53, P15, P27, P9, P57, D1, P63, P29, P39, P47, P23, P51, P37, P7, P49, P43, P25, P19, P45a, P55, P33, D7, P61	33
2L	146997	A	T	germline_recurrent	P35, P41, P11, P5, D3, P65, P31, P59, D5, P17, P53, P15, P27, P9, P57, D1, P63, P29, P39, P47, P23, P51, P37, P7, P49, P43, P25, P19, P45a, P55, P33, D7, P61	33
2L	147102	T	A	germline_recurrent	P35, P41, P11, D3, P65, P31, P59, D5, P17, P53, P15, P27, P9, P57, D1, P63, P29, P39, P47, P23, P51, P37, P7, P49, P43, P25, P19, P45a, P55, P33, D7, P61	32
2L	147254	C	T	germline_recurrent	P35, P41, P11, D3, P65, P31, P59, D5, P17, P53, P15, P27, P9, P57, D1, P63, P29, P39, P47, P23, P51, P37, P7, P49, P43, P25, P19, P45a, P55, P33, D7, P61	32
2L	147688	C	T	germline_recurrent	P35, P41, P11, D3, P65, P31, P59, D5, P17, P53, P15, P27, P9, P57, D1, P63, P29, P47, P23, P51, P37, P49, P43, P25, P19, P45a, P55, P33, D7, P61	30
2L	149664	T	C	germline_recurrent	P35, P41, P11, D3, P65, P31, P59, D5, P17, P53, P15, P27, P9, P57, D1, P63, P29, P39, P47, P23, P51, P37, P7, P49, P43, P25, P19, P45a, P55, P33, D7, P61	32
2L	150312	A	T	germline_recurrent	P35, P41, P11, P65, P31, P59, P17, P53, P15, P27, P9, P63, P29, P3, P47, P37, P49, P43, P19, P45a, P55, P33, P61	23
2L	150932	T	G	germline_recurrent	P35, P41, P11, D3, P65, P31, P59, D5, P17, P53, P15, P27, P9, P57, D1, P63, P29, P39, P47, P23, P51, P37, P7, P49, P43, P25, P19, P55, P33, D7, P61	31
2L	151022	T	G	germline_recurrent	P35, P41, P11, D3, P65, P31, P59, D5, P17, P53, P15, P27, P9, P57, D1, P63, P29, P39, P47, P23, P51, P37, P7, P49, P43, P25, P19, P45a, P55, P33, D7, P61	32
2L	152103	A	G	germline_recurrent	P35, P41, P11, D3, P65, P31, P59, D5, P17, P53, P15, P27, P9, P57, D1, P63, P29, P39, P3, P47, P23, P51, P37, P7, P49, P43, P25, P19, P45a, P55, P33, D7, P61	33
2L	153593	T	C	germline_recurrent	P35, P41, P11, P5, D3, P65, P31, P59, P17, P53, P15, P27, P9, P57, D1, P63, P29, P39, P3, P47, P51, P37, P7, P49, P43, P19, P45a, P55, P33, D7, P61	31
2L	153797	A	G	germline_recurrent	P35, P41, P11, D3, P65, P31, P59, D5, P17, P53, P15, P27, P9, P57, D1, P63, P29, P39, P3, P47, P23, P51, P37, P7, P49, P43, P25, P19, P45a, P55, P33, D7, P61	33
2L	154698	A	C	germline_recurrent	P35, P41, P11, P5, D3, P65, P31, P59, D5, P17, P53, P15, P27, P9, P57, D1, P63, P29, P39, P47, P23, P51, P37, P7, P49, P43, P25, P19, P45a, P55, P33, D7, P61	33
2L	155303	C	T	germline_recurrent	P35, P41, P11, D3, P65, P31, P59, D5, P17, P53, P15, P27, P9, P57, D1, P63, P29, P47, P23, P51, P37, P7, P49, P43, P25, P19, P45a, P55, P33, D7, P61	31
2L	155691	C	G	germline_recurrent	P35, P41, P11, P5, D3, P65, P31, P59, D5, P53, P15, P27, P9, P57, D1, P63, P29, P39, P3, P47, P23, P51, P37, P7, P49, P43, P25, P19, P45a, P55, P33, D7, P61	33
2L	155961	G	T	germline_recurrent	P35, P41, P11, P5, D3, P65, P31, P59, D5, P53, P15, P27, P9, P1, P57, D1, P63, P29, P23, P51, P37, P49, P43, P25, P19, P45a, P55, P33, D7, P61	30
2L	156538	T	G	germline_recurrent	P35, P41, P11, P65, P31, P59, P17, P53, P15, P27, P9, P57, P63, P29, P39, P47, P23, P51, P37, P7, P49, P43, P25, P19, P45a, P55, P33, P61	28
2L	157017	C	G	germline_recurrent	P35, P41, P11, D3, P65, P31, P59, D5, P17, P53, P15, P27, P9, P57, D1, P63, P29, P39, P47, P23, P51, P37, P7, P49, P43, P25, P19, P45a, P55, P33, D7, P61	32
2L	157709	T	A	germline_recurrent	P35, P41, P11, P5, D3, P65, P31, P59, D5, P17, P53, P15, P27, P9, P57, D1, P63, P29, P47, P51, P37, P49, P43, P19, P55, P33, D7, P61	28
2L	157831	C	A	germline_recurrent	P35, P41, P11, P5, D3, P65, P31, P59, D5, P17, P53, P15, P27, P9, P57, D1, P63, P29, P47, P51, P37, P49, P43, P19, P45a, P55, P33, D7	28
2L	158488	T	C	germline_recurrent	P35, P41, P11, P5, D3, P65, P31, P59, D5, P17, P53, P15, P27, P9, P1, D1, P63, P29, P47, P23, P51, P37, P49, P43, P25, P19, P45a, P55, P33, D7, P61	31
2L	158812	T	A	germline_recurrent	P35, P41, P11, P5, D3, P65, P31, P59, D5, P53, P15, P27, P9, P57, D1, P63, P29, P37, P49, P43, P19, P45a, P55, P33, D7, P61	26
2L	158894	G	A	germline_recurrent	P35, P41, P11, D3, P65, P31, P59, P53, P15, P27, P9, P57, D1, P63, P29, P39, P47, P51, P37, P49, P43, P19, P45a, P55, P33, D7, P61	27
2L	159531	T	C	germline_recurrent	P35, P41, P11, D3, P65, P31, P59, D5, P53, P15, P9, P1, P57, D1, P63, P29, P47, P23, P37, P49, P43, P19, P45a, P55, P33, D7, P61	27
2L	160228	T	C	germline_recurrent	P35, P41, P11, P5, D3, P65, P31, P59, P17, P53, P15, P9, D1, P63, P29, P3, P47, P37, P7, P49, P43, P19, P45a, P33, D7	25
2L	161042	T	C	germline_recurrent	P35, P41, P11, D3, P65, P31, P59, D5, P17, P53, P15, P27, P9, P57, D1, P63, P29, P39, P47, P51, P37, P49, P43, P19, P45a, P55, P33, D7, P61	29
2L	161428	C	T	germline_recurrent	P35, P41, P11, D3, P65, P31, P59, D5, P53, P15, P27, P9, P57, D1, P63, P29, P23, P51, P37, P49, P43, P25, P19, P45a, P55, P33, D7, P61	28
2L	161508	C	A	germline_recurrent	P35, P41, P11, P65, P31, P59, P17, P53, P15, P27, P9, P57, P63, P29, P39, P47, P23, P51, P37, P7, P49, P43, P25, P19, P45a, P55, P33, P61	28
2L	161983	G	C	germline_recurrent	P35, P41, P11, D3, P65, P31, P59, D5, P53, P15, P27, P9, P57, D1, P63, P29, P39, P47, P23, P37, P7, P49, P43, P25, P19, P55, P33, D7, P61	29
2L	163516	A	C	germline_recurrent	P35, P41, P11, P65, P31, P59, P17, P53, P15, P27, P9, P57, P63, P29, P47, P23, P51, P37, P7, P49, P43, P25, P19, P45a, P55, P33, P61	27
2L	163611	T	G	germline_recurrent	P35, P41, P11, D3, P65, P31, P59, D5, P53, P15, P27, P9, P57, D1, P63, P29, P39, P47, P23, P51, P37, P49, P43, P25, P19, P45a, P55, P33, D7, P61	30
2L	164690	A	C	germline_recurrent	P35, P41, P11, P5, D3, P65, P31, P59, P15, P9, P57, D1, P63, P29, P47, P51, P37, P7, P49, P43, P19, P45a, P55, P33, D7, P61	26
2L	164734	G	A	germline_recurrent	P35, P41, P11, P5, D3, P65, P31, P59, P15, P27, P9, P57, D1, P63, P29, P47, P37, P49, P43, P19, P45a, P33, D7, P61	24
2L	165141	C	T	germline_recurrent	P35, P41, P11, P5, D3, P65, P31, P59, P17, P53, P15, P27, P9, P1, P57, D1, P63, P29, P39, P47, P37, P7, P49, P43, P19, P45a, P55, P33, D7, P61	30
2L	165228	A	T	germline_recurrent	P35, P41, P11, P5, D3, P65, P31, P59, D5, P17, P53, P15, P27, P9, P1, P57, D1, P63, P29, P39, P47, P51, P37, P7, P49, P43, P19, P45a, P55, P33, D7, P61	32
2L	165233	C	A	germline_recurrent	P35, P41, P11, P5, D3, P65, P31, P59, D5, P17, P53, P15, P27, P9, P1, P57, D1, P63, P29, P39, P47, P51, P37, P7, P49, P43, P25, P19, P45a, P55, P33, D7, P61	33
2L	165314	T	C	germline_recurrent	P35, P41, P11, P5, D3, P65, P31, P59, D5, P17, P53, P15, P27, P9, P1, P57, D1, P63, P29, P39, P47, P51, P37, P7, P49, P43, P25, P19, P45a, P55, P33, D7, P61	33
2L	165675	A	T	germline_recurrent	P35, P41, P11, P5, D3, P65, P31, P59, D5, P53, P15, P27, P9, P57, D1, P63, P29, P23, P37, P7, P49, P43, P25, P19, P45a, P55, P33, D7	28
2L	165985	C	T	germline_recurrent	P35, P41, P11, P5, D3, P65, P31, P59, P53, P15, P27, P9, P1, P57, D1, P63, P29, P47, P51, P37, P49, P43, P25, P19, P45a, P55, P33, D7, P61	29
2L	166027	G	A	germline_recurrent	P35, P41, P11, P5, D3, P65, P31, P59, D5, P53, P15, P27, P9, P1, P57, D1, P63, P29, P39, P47, P23, P51, P37, P7, P49, P43, P25, P19, P45a, P55, P33, D7, P61	33
2L	167152	A	G	germline_recurrent	P35, P41, P11, D3, P65, P31, P59, D5, P17, P53, P15, P27, P9, P57, D1, P63, P29, P47, P51, P37, P7, P49, P43, P19, P45a, P55, P33, D7, P61	29
2L	167271	T	G	germline_recurrent	P35, P41, P11, P5, D3, P65, P31, P59, D5, P17, P53, P15, P27, P9, P57, D1, P63, P29, P3, P47, P51, P37, P49, P43, P19, P55, P33, D7	28
2L	168306	C	T	germline_recurrent	P35, P41, P11, P5, D3, P65, P31, P59, D5, P17, P53, P15, P27, P9, P57, D1, P63, P29, P47, P23, P51, P37, P49, P43, P25, P19, P45a, P55, P33, D7, P61	31
2L	168605	C	G	germline_recurrent	P35, P41, P11, P5, D3, P65, P31, P59, D5, P17, P53, P15, P27, P9, P57, D1, P63, P29, P39, P3, P47, P23, P51, P37, P7, P49, P43, P25, P19, P45a, P55, P33, D7, P61	34
2L	168867	A	G	germline_recurrent	P35, P41, P11, P5, D3, P65, P31, P59, D5, P53, P15, P27, P9, P57, D1, P63, P29, P47, P37, P7, P49, P43, P19, P45a, P55, P33, D7, P61	28
2L	169089	T	C	germline_recurrent	P35, P11, P5, D3, P31, P15, P9, D1, P29, P47, P37, P7, P43, P19, P33	15
2L	169095	A	T	germline_recurrent	P35, P11, P5, D3, P31, P15, P9, D1, P63, P29, P47, P37, P7, P43, P19, P33	16
2L	169163	A	T	germline_recurrent	P35, P41, P11, P5, D3, P65, P31, P59, D5, P17, P53, P15, P27, P9, P57, D1, P63, P29, P47, P37, P7, P49, P43, P25, P19, P45a, P55, P33, D7	29
2L	169468	G	A	germline_recurrent	P35, P41, P11, P5, D3, P65, P31, P59, D5, P17, P53, P15, P27, P9, P57, D1, P63, P29, P39, P47, P23, P37, P7, P49, P43, P25, P19, P45a, P55, P33, D7, P61	32
2L	171314	T	A	germline_recurrent	P35, P41, P11, P5, D3, P31, D5, P15, P9, D1, P63, P29, P3, P37, P7, P19, P45a, P33, D7	19
2L	171550	A	T	germline_recurrent	P35, P41, P11, P5, D3, P65, P31, P59, P17, P53, P15, P27, P9, P57, D1, P63, P29, P3, P47, P37, P7, P49, P43, P19, P45a, P33	26
2L	171719	T	C	germline_recurrent	P35, P41, P11, D3, P65, P31, P59, D5, P53, P15, P27, P9, P57, D1, P63, P29, P3, P47, P23, P51, P37, P7, P49, P43, P25, P19, P45a, P55, P33, D7, P61	31
2L	172459	T	G	germline_recurrent	P35, P41, P11, P5, D3, P31, P15, P9, P63, P29, P47, P37, P7, P43, P19, P33	16
2L	172514	T	A	germline_recurrent	P35, P41, P11, P5, D3, P31, P15, D1, P29, P37, P43, P19, P33	13
2L	172867	C	T	germline_recurrent	P35, P41, P11, P65, P31, P59, P17, P53, P15, P27, P9, P1, P57, P63, P29, P47, P23, P37, P7, P49, P43, P25, P19, P45a, P55, P33, P61	27
2L	173627	T	G	germline_recurrent	P35, P41, P11, P5, D3, P65, P31, P59, D5, P53, P15, P27, P9, P1, P57, D1, P63, P29, P47, P23, P51, P37, P7, P49, P43, P25, P19, P45a, P55, P33, D7	31
2L	174687	C	T	germline_recurrent	P35, P41, P11, P65, P31, P59, P53, P15, P27, P9, P57, P63, P29, P47, P37, P7, P49, P43, P25, P19, P45a, P33	22
2L	176748	A	T	germline_recurrent	P35, P41, P11, P65, P31, P59, P15, P9, P63, P29, P37, P7, P43, P19, P33, P61	16
2L	177565	C	A	germline_recurrent	P35, P41, P11, P65, P31, P59, P53, P15, P27, P9, P57, P63, P29, P37, P7, P49, P43, P19, P45a, P55, P33, P61	22
2L	179473	G	A	germline_recurrent	P35, P41, P11, D3, P65, P31, P59, D5, P17, P53, P15, P27, P9, P57, D1, P63, P29, P47, P37, P7, P49, P43, P25, P19, P45a, P55, P33, D7	28
2L	179837	A	G	germline_recurrent	P35, P41, P11, P5, D3, P65, P31, P59, D5, P17, P53, P15, P27, P9, D1, P63, P29, P3, P47, P37, P7, P49, P43, P19, P45a, P55, P33, D7, P61	29
2L	182145	A	C	germline_recurrent	P35, P41, P11, P5, D3, P31, P59, P15, P9, P57, D1, P63, P29, P47, P37, P7, P33	17
2L	182298	A	C	germline_recurrent	P35, P41, P11, P5, D3, P65, P31, P59, P17, P53, P15, P27, P9, P1, P57, D1, P63, P29, P3, P47, P37, P7, P49, P43, P19, P45a, P55, P33, D7, P61	30
2L	182511	A	G	germline_recurrent	P35, P41, P11, P5, D3, P31, P59, D5, P17, P53, P15, P9, P1, D1, P63, P29, P47, P51, P37, P49, P43, P19, P33, D7	24
2L	182585	C	G	germline_recurrent	P35, P41, P11, D3, P31, P59, P17, P53, P15, P9, P1, D1, P63, P29, P47, P51, P37, P7, P43, P19, P45a, P33, D7	23
2L	182725	A	G	germline_recurrent	P35, P41, P11, D3, P65, P31, D5, P53, P15, P27, P9, D1, P63, P29, P47, P37, P49, P43, P19, P45a, P33, D7	22
2L	183672	G	A	germline_recurrent	P35, P11, P5, D3, P65, P31, P15, P9, D1, P63, P29, P37, P19, P33	14
2L	186136	T	G	germline_recurrent	P35, P41, P11, P5, D3, P65, P31, P59, D5, P17, P53, P15, P27, P9, P57, D1, P63, P29, P51, P37, P49, P43, P25, P19, P45a, P55, P33, D7, P61	29
2L	188626	C	T	germline_recurrent	P35, P41, P11, D3, P65, P31, P59, D5, P17, P53, P15, P27, P9, P57, D1, P63, P29, P39, P47, P23, P51, P37, P7, P49, P43, P25, P19, P45a, P55, P33, D7, P61	32
2L	189397	A	C	germline_recurrent	P35, P41, P11, P65, P31, P59, P17, P53, P15, P27, P9, P57, P63, P29, P39, P47, P23, P51, P37, P7, P49, P43, P25, P19, P45a, P55, P33, P61	28
2L	189403	C	G	germline_recurrent	P35, P41, P11, D3, P65, P31, P59, D5, P17, P53, P15, P27, P9, P57, D1, P63, P29, P39, P47, P23, P51, P37, P7, P49, P43, P25, P19, P45a, P55, P33, D7, P61	32
2L	190298	G	A	germline_recurrent	P35, P41, P11, P5, D3, P65, P31, P59, D5, P53, P15, P27, P9, P57, D1, P63, P29, P39, P23, P51, P37, P49, P43, P25, P19, P45a, P55, P33, D7, P61	30
2L	190466	T	C	germline_recurrent	P35, P41, P11, P5, D3, P65, P31, P59, D5, P17, P53, P15, P27, P9, P57, D1, P63, P29, P39, P47, P23, P51, P37, P7, P49, P43, P25, P19, P45a, P55, P33, D7, P61	33
2L	192412	A	G	germline_recurrent	P35, P41, P11, P5, D3, P65, P31, P59, D5, P17, P53, P15, P27, P9, P57, D1, P63, P29, P39, P47, P23, P51, P37, P7, P49, P43, P25, P19, P45a, P55, P33, D7, P61	33
2L	192484	C	T	germline_recurrent	P35, P41, P11, P5, D3, P65, P31, P59, D5, P17, P53, P15, P27, P9, P57, D1, P63, P29, P39, P47, P23, P51, P37, P49, P43, P25, P19, P45a, P55, P33, D7, P61	32
2L	192594	A	G	germline_recurrent	P35, P41, P11, P5, D3, P65, P31, P59, D5, P17, P53, P15, P27, P9, P57, D1, P63, P29, P39, P47, P23, P51, P37, P49, P43, P25, P19, P45a, P55, P33, D7, P61	32
2L	194601	C	T	germline_recurrent	P35, P41, P11, D3, P65, P31, P59, D5, P17, P53, P15, P27, P9, P57, D1, P63, P29, P39, P47, P23, P51, P37, P49, P43, P25, P19, P45a, P55, P33, D7, P61	31
2L	194865	G	A	germline_recurrent	P35, P41, P11, D3, P65, P31, P59, D5, P17, P53, P15, P27, P9, P57, D1, P63, P29, P47, P51, P37, P7, P49, P43, P25, P19, P45a, P55, P33, D7, P61	30
2L	195338	T	C	germline_recurrent	P35, P41, P11, D3, P65, P31, P59, D5, P17, P53, P15, P27, P9, P57, D1, P63, P29, P39, P47, P23, P51, P37, P49, P43, P25, P19, P45a, P55, P33, D7, P61	31
2L	198822	A	C	germline_recurrent	P35, P41, P11, D3, P65, P31, P59, D5, P17, P53, P15, P27, P9, P57, D1, P63, P29, P39, P47, P23, P51, P37, P7, P49, P43, P25, P19, P45a, P55, P33, D7, P61	32
2L	199059	C	G	germline_recurrent	P35, P41, P11, D3, P65, P31, P59, D5, P17, P53, P15, P27, P9, P57, D1, P63, P29, P39, P47, P23, P51, P37, P7, P49, P43, P25, P19, P45a, P55, P33, D7, P61	32
2L	200342	T	C	germline_recurrent	P35, P41, P11, P5, D3, P31, P59, D5, P17, P53, P15, P27, P9, P57, D1, P63, P29, P39, P47, P23, P51, P37, P7, P49, P43, P25, P19, P45a, P55, P33, D7, P61	32
2L	200401	C	T	germline_recurrent	P35, P41, P11, D3, P65, P31, P59, D5, P17, P53, P15, P27, P9, P57, D1, P63, P29, P39, P47, P23, P51, P37, P7, P49, P43, P25, P19, P45a, P55, P33, D7, P61	32
2L	200947	T	C	germline_recurrent	P35, P41, P11, D3, P65, P31, P59, D5, P17, P53, P15, P27, P9, P57, D1, P63, P29, P3, P47, P23, P51, P37, P7, P49, P43, P25, P19, P45a, P55, P33, D7, P61	32
2L	203030	G	A	germline_recurrent	P35, P41, P11, P5, D3, P31, P59, P15, P9, P1, D1, P63, P29, P3, P37, P43, P19, P33, D7	19
2L	203925	G	A	germline_recurrent	P35, P41, P11, P5, D3, P65, P31, P59, D5, P17, P53, P15, P27, P9, P1, P57, D1, P63, P29, P3, P47, P23, P51, P37, P7, P49, P43, P19, P45a, P55, P33, D7, P61	33
2L	203977	G	T	germline_recurrent	P35, P41, P11, D3, P65, P31, P59, D5, P17, P53, P15, P27, P9, P57, D1, P63, P29, P39, P47, P23, P51, P37, P49, P43, P19, P45a, P55, P33, D7, P61	30
2L	204925	A	C	germline_recurrent	P35, P41, P11, P5, D3, P65, P31, P59, D5, P17, P53, P15, P27, P9, P57, D1, P63, P29, P39, P47, P23, P51, P37, P7, P49, P43, P19, P45a, P55, P33, D7, P61	32
2L	206256	G	T	germline_recurrent	P35, P41, P11, P5, D3, P65, P31, P59, D5, P17, P53, P15, P27, P9, P57, D1, P63, P29, P39, P3, P47, P23, P51, P37, P7, P49, P43, P25, P19, P45a, P55, P33, D7, P61	34
2L	206484	T	G	germline_recurrent	P35, P41, P11, P65, P31, P59, P17, P53, P15, P27, P9, P57, P63, P29, P39, P47, P23, P51, P37, P7, P49, P43, P25, P19, P45a, P55, P33, P61	28
2L	206592	G	A	germline_recurrent	P35, P41, P11, P5, D3, P65, P31, P59, D5, P17, P53, P15, P27, P9, P57, D1, P63, P29, P47, P51, P37, P7, P49, P43, P19, P45a, P55, P33, D7, P61	30
2L	206999	G	A	germline_recurrent	P35, P41, P11, P5, D3, P65, P31, P59, D5, P17, P53, P15, P27, P9, P57, D1, P63, P29, P3, P47, P37, P7, P49, P43, P25, P19, P45a, P33, D7	29
2L	207688	T	A	germline_recurrent	P35, P41, P11, D3, P65, P31, P59, D5, P53, P15, P27, P9, P1, P57, D1, P63, P29, P39, P47, P23, P51, P37, P7, P49, P43, P25, P19, P45a, P55, P33, D7, P61	32
2L	208335	A	T	germline_recurrent	P35, P41, P11, D3, P65, P31, D5, P15, P27, P9, P57, D1, P63, P29, P47, P23, P37, P7, P49, P43, P25, P19, P55, P33, D7	25
2L	208730	T	C	germline_recurrent	P35, P41, P11, P65, P31, P59, P17, P53, P15, P27, P9, P57, P63, P29, P47, P51, P37, P49, P43, P19, P45a, P55, P33, P61	24
2L	209243	T	C	germline_recurrent	P35, P41, P11, D3, P65, P31, P59, D5, P17, P53, P15, P27, P9, P57, D1, P63, P29, P39, P47, P23, P37, P7, P49, P43, P25, P19, P45a, P55, P33, D7, P61	31
2L	210726	T	C	germline_recurrent	P35, P41, P11, P5, D3, P31, P15, P1, D1, P3, P37, P19, P33	13
2L	211139	C	A	germline_recurrent	P35, P41, P11, P5, D3, P31, P59, D5, P17, P15, P27, P9, D1, P63, P29, P47, P23, P37, P43, P19, P33, D7	22
2L	211501	T	C	germline_recurrent	P35, P41, P11, D3, P65, P31, P17, P15, P9, P57, D1, P63, P29, P47, P37, P43, P19, P45a, P33	19
2L	211587	T	G	germline_recurrent	P35, P41, P11, P5, D3, P65, P31, P59, D5, P17, P53, P15, P27, P9, P57, D1, P63, P29, P3, P47, P51, P37, P7, P49, P43, P19, P45a, P55, P33, D7, P61	31
2L	212317	A	T	germline_recurrent	P35, P41, P11, D3, P65, P31, P59, D5, P17, P53, P15, P27, P9, P57, D1, P63, P29, P47, P23, P51, P37, P49, P43, P25, P19, P45a, P55, P33, D7, P61	30
2L	212913	C	T	germline_recurrent	P35, P41, P11, P65, P31, P59, P17, P53, P15, P27, P9, P57, P63, P29, P39, P47, P51, P37, P7, P49, P43, P25, P19, P45a, P55, P33, P61	27
2L	213547	A	G	germline_recurrent	P35, P41, P11, D3, P65, P31, P59, D5, P17, P53, P15, P27, P9, P1, P57, D1, P63, P29, P3, P23, P51, P37, P7, P49, P43, P25, P19, P45a, P55, P33, D7, P61	32
2L	214057	T	C	germline_recurrent	P35, P41, P11, P5, D3, P65, P31, P59, D5, P17, P53, P15, P27, P9, P57, D1, P63, P29, P39, P47, P23, P51, P37, P7, P49, P43, P25, P19, P45a, P55, P33, D7, P61	33
2L	214264	C	A	germline_recurrent	P35, P41, P11, D3, P65, P31, P59, D5, P17, P53, P15, P27, P9, P57, D1, P63, P29, P39, P47, P51, P37, P49, P43, P25, P19, P45a, P55, P33, D7, P61	30
2L	215900	A	C	germline_recurrent	P35, P41, P11, D3, P65, P31, P59, D5, P17, P53, P15, P27, P9, P57, D1, P63, P29, P47, P23, P37, P49, P43, P25, P19, P55, P33, D7, P61	28
2L	216052	C	A	germline_recurrent	P35, P41, P11, P5, D3, P65, P31, D5, P15, P9, P1, P57, D1, P63, P29, P47, P37, P43, P19, P45a, P33, D7, P61	23
2L	216918	T	C	germline_recurrent	P35, P41, P11, P5, D3, P65, P31, P59, D5, P53, P15, P27, P9, P57, D1, P63, P29, P39, P47, P23, P51, P37, P49, P43, P25, P19, P45a, P55, P33, D7, P61	31
2L	217179	G	A	germline_recurrent	P35, P41, P11, D3, P65, P31, P59, D5, P53, P15, P27, P9, P57, D1, P63, P29, P39, P47, P23, P51, P37, P49, P43, P25, P19, P45a, P55, P33, D7, P61	30
2L	218380	G	A	germline_recurrent	P35, P41, P11, P5, D3, P65, P31, P59, D5, P17, P53, P15, P27, P9, P57, D1, P63, P29, P39, P47, P23, P51, P37, P7, P49, P43, P25, P19, P45a, P55, P33, D7, P61	33
2L	218490	C	T	germline_recurrent	P35, P41, P11, D3, P65, P31, P59, D5, P53, P15, P27, P9, P57, D1, P63, P29, P39, P23, P51, P37, P7, P49, P43, P25, P19, P45a, P55, P33, D7, P61	30
2L	218829	C	A	germline_recurrent	P35, P41, P11, P5, D3, P65, P31, P59, D5, P17, P53, P15, P27, P9, D1, P63, P29, P51, P37, P49, P43, P19, P45a, P33, D7, P61	26
2L	219091	C	T	germline_recurrent	P35, P11, P5, P31, P15, P9, D1, P29, P37, P19, P33	11
2L	219102	A	T	germline_recurrent	P35, P11, P5, P31, P15, P9, D1, P29, P37, P19, P33	11
2L	219902	T	G	germline_recurrent	P35, P41, P11, D3, P65, P31, P59, D5, P17, P53, P15, P27, P9, P57, D1, P63, P29, P47, P23, P37, P49, P43, P19, P45a, P55, P33, D7, P61	28
2L	220226	T	C	germline_recurrent	P35, P41, P11, P5, D3, P31, P15, P9, D1, P29, P47, P37, P49, P43, P19, P45a, P33, D7	18
2L	220651	T	C	germline_recurrent	P35, P41, P11, D3, P65, P31, P59, D5, P17, P53, P15, P27, P9, P57, D1, P63, P29, P47, P51, P37, P7, P49, P43, P25, P19, P45a, P55, P33, D7, P61	30
2L	220693	G	C	germline_recurrent	P35, P41, P11, P5, D3, P65, P31, P59, D5, P17, P53, P15, P27, P9, P57, D1, P63, P29, P39, P47, P51, P37, P49, P43, P25, P19, P45a, P55, P33, D7, P61	31
2L	220765	G	C	germline_recurrent	P35, P41, P11, P5, D3, P65, P31, P59, D5, P17, P53, P15, P27, P9, P57, D1, P63, P29, P47, P23, P51, P37, P7, P49, P43, P25, P19, P45a, P55, P33, D7	31
2L	220938	G	T	germline_recurrent	P35, P41, P11, P5, D3, P65, P31, P15, P9, P1, D1, P63, P29, P47, P37, P43, P19, P45a, P33, D7	20
2L	221136	C	G	germline_recurrent	P35, P41, P11, P5, D3, P31, P59, P53, P15, P9, P57, D1, P63, P29, P39, P3, P47, P51, P37, P49, P43, P19, P45a, P33, D7	25
2L	221192	C	A	germline_recurrent	P35, P41, P11, P5, D3, P65, P31, P59, D5, P53, P15, P27, P9, P57, D1, P63, P29, P47, P51, P37, P7, P49, P43, P19, P45a, P33, D7, P61	28
2L	221328	C	A	germline_recurrent	P35, P41, P11, P31, P59, P17, P53, P15, P27, P9, P1, P57, P63, P29, P39, P47, P23, P51, P37, P7, P49, P43, P25, P19, P45a, P55, P33, P61	28
2L	221912	C	G	germline_recurrent	P35, P41, P11, P5, D3, P65, P31, P59, D5, P53, P15, P27, P9, P57, D1, P63, P29, P39, P47, P23, P51, P37, P7, P49, P43, P25, P19, P45a, P55, P33, D7, P61	32
2L	222148	G	T	germline_recurrent	P35, P41, P11, D3, P65, P31, P59, D5, P17, P53, P15, P27, P9, P57, D1, P63, P29, P47, P23, P37, P7, P49, P43, P25, P19, P45a, P55, P33, D7, P61	30
2L	222273	A	C	germline_recurrent	P35, P41, P11, P5, D3, P65, P31, P59, D5, P17, P53, P15, P27, P9, P57, D1, P63, P29, P39, P47, P23, P51, P37, P7, P49, P43, P25, P19, P45a, P55, P33, D7, P61	33
2L	222410	A	G	germline_recurrent	P35, P41, P11, D3, P65, P31, P59, D5, P53, P15, P27, P9, P57, D1, P63, P29, P39, P47, P51, P37, P7, P49, P43, P25, P19, P45a, P55, P33, D7, P61	30
2L	222501	T	C	germline_recurrent	P35, P41, P11, P5, D3, P65, P31, P59, D5, P17, P53, P15, P27, P9, P57, D1, P63, P29, P39, P47, P23, P51, P37, P7, P49, P43, P25, P19, P45a, P55, P33, D7, P61	33
2L	223731	T	A	germline_recurrent	P35, P41, P11, P5, D3, P65, P31, P59, D5, P53, P15, P27, P9, P1, P57, D1, P63, P29, P39, P47, P23, P37, P49, P43, P25, P19, P45a, P55, P33, D7, P61	31
2L	223843	T	C	germline_recurrent	P35, P41, P11, D3, P65, P31, P59, D5, P17, P53, P15, P27, P9, P1, P57, D1, P63, P29, P39, P47, P23, P51, P37, P49, P43, P25, P19, P45a, P55, P33, D7, P61	32
2L	224091	G	A	germline_recurrent	P35, P41, P11, P5, D3, P65, P31, P59, D5, P53, P15, P27, P9, P57, D1, P63, P29, P47, P23, P51, P37, P7, P49, P43, P25, P19, P45a, P55, P33, D7, P61	31
2L	224964	T	G	germline_recurrent	P35, P41, P11, D3, P65, P31, P59, D5, P17, P53, P15, P27, P9, P57, D1, P63, P29, P39, P3, P47, P51, P37, P7, P49, P43, P19, P55, P33, D7, P61	30
2L	225718	T	A	germline_recurrent	P35, P41, P11, P5, D3, P65, P31, P59, D5, P17, P53, P15, P27, P9, P57, D1, P63, P29, P47, P51, P37, P7, P49, P43, P25, P19, P45a, P55, P33, D7, P61	31
2L	226835	T	C	germline_recurrent	P35, P41, P11, D3, P31, P59, D5, P17, P53, P15, P27, P9, P57, D1, P63, P29, P3, P47, P23, P51, P37, P7, P49, P43, P25, P19, P45a, P55, P33, D7, P61	31
2L	226904	A	T	germline_recurrent	P35, P41, P11, P5, P65, P31, P59, P17, P53, P15, P27, P9, P57, P63, P29, P3, P47, P51, P37, P7, P49, P43, P25, P19, P45a, P55, P33, P61	28
2L	227221	A	C	germline_recurrent	P35, P41, P11, P5, P65, P31, P59, P17, P53, P15, P27, P9, P1, P57, P63, P29, P47, P51, P37, P7, P49, P43, P25, P19, P45a, P33, P61	27
2L	227396	T	C	germline_recurrent	P35, P41, P11, P65, P31, P59, P17, P53, P15, P27, P9, P57, P63, P29, P39, P3, P47, P23, P51, P37, P7, P49, P43, P25, P19, P45a, P55, P33, P61	29
2L	228194	A	G	germline_recurrent	P35, P41, P11, P5, D3, P65, P31, P59, D5, P17, P53, P15, P27, P9, P57, D1, P63, P29, P39, P23, P51, P37, P7, P49, P43, P25, P19, P45a, P55, P33, D7, P61	32
2L	228351	A	G	germline_recurrent	P35, P41, P11, P5, D3, P65, P31, P59, D5, P17, P53, P15, P27, P9, P57, D1, P63, P29, P47, P23, P51, P37, P7, P49, P43, P25, P19, P45a, P55, P33, D7, P61	32
2L	228842	A	C	germline_recurrent	P35, P41, P11, P5, D3, P65, P31, D5, P15, P9, P57, D1, P63, P29, P47, P37, P49, P43, P25, P19, P45a, P33, D7	23
2L	228903	T	C	germline_recurrent	P35, P41, P5, D3, P65, P31, P59, P15, P9, P57, D1, P63, P29, P47, P37, P43, P19, P33, D7	19
2L	229060	A	G	germline_recurrent	P35, P41, P11, P5, D3, P65, P31, P59, D5, P53, P15, P27, P9, P57, D1, P63, P29, P47, P51, P37, P7, P49, P43, P25, P19, P45a, P55, P33, D7	29
2L	229424	T	G	germline_recurrent	P35, P41, P11, P5, D3, P65, P31, P59, D5, P17, P53, P15, P27, P9, P1, P57, D1, P63, P29, P39, P47, P23, P51, P37, P7, P49, P43, P25, P19, P45a, P55, P33, D7, P61	34
2L	229849	T	C	germline_recurrent	P35, P41, P11, D3, P31, P59, D5, P17, P53, P15, P27, P9, P57, D1, P63, P29, P47, P23, P37, P7, P49, P43, P25, P19, P45a, P55, P33, D7	28
2L	232131	A	T	germline_recurrent	P35, P41, P11, D3, P65, P31, P59, P17, P53, P15, P27, P9, P57, D1, P63, P29, P39, P47, P23, P51, P37, P7, P49, P43, P25, P19, P45a, P55, P33, D7, P61	31
2L	232365	G	A	germline_recurrent	P35, P41, P11, P65, P31, P59, P17, P53, P15, P27, P9, P57, P63, P29, P39, P47, P23, P51, P37, P7, P49, P43, P25, P19, P45a, P55, P33, P61	28
2L	233746	T	C	germline_recurrent	P35, P41, P11, D3, P65, P31, P59, D5, P17, P53, P15, P27, P9, P57, D1, P63, P29, P39, P47, P23, P51, P37, P49, P43, P25, P19, P45a, P55, P33, D7, P61	31
2L	234412	C	T	germline_recurrent	P35, P41, P11, P5, D3, P65, P31, P59, D5, P17, P53, P15, P27, P9, P57, D1, P63, P29, P39, P47, P23, P51, P37, P7, P49, P43, P25, P19, P45a, P55, P33, D7, P61	33
2L	235852	T	A	germline_recurrent	P35, P41, P11, P5, D3, P65, P31, P59, D5, P17, P53, P15, P27, P9, P1, P57, D1, P63, P29, P39, P3, P47, P23, P37, P49, P43, P25, P19, P45a, P55, P33, D7, P61	33
2L	236383	G	A	germline_recurrent	P35, P41, P11, D3, P65, P31, P59, D5, P17, P53, P15, P27, P9, P57, D1, P63, P29, P39, P47, P23, P51, P37, P7, P49, P43, P25, P19, P45a, P55, P33, D7, P61	32
2L	236608	A	T	germline_recurrent	P35, P41, P11, P5, D3, P65, P31, P59, D5, P17, P53, P15, P27, P9, P57, D1, P63, P29, P39, P47, P51, P37, P7, P49, P43, P25, P19, P45a, P55, P33, D7, P61	32
2L	236757	C	G	germline_recurrent	P35, P41, P11, P5, D3, P65, P31, P59, D5, P17, P53, P15, P27, P9, P57, D1, P63, P29, P39, P47, P23, P51, P37, P7, P49, P43, P25, P19, P45a, P55, P33, D7, P61	33
2L	236866	G	A	germline_recurrent	P35, P41, P11, P5, D3, P65, P31, P59, D5, P17, P53, P15, P27, P9, P1, P57, D1, P63, P29, P39, P47, P23, P51, P37, P7, P49, P43, P25, P19, P45a, P55, P33, D7, P61	34
2L	236923	C	G	germline_recurrent	P35, P41, P11, P5, D3, P65, P31, P59, D5, P17, P53, P15, P27, P9, P57, D1, P63, P29, P39, P3, P47, P23, P51, P37, P7, P49, P43, P25, P19, P45a, P55, P33, D7, P61	34
2L	237203	A	G	germline_recurrent	P35, P41, P11, P5, D3, P65, P31, P59, D5, P17, P53, P15, P27, P9, P57, D1, P63, P29, P39, P47, P51, P37, P7, P49, P43, P25, P19, P45a, P55, P33, D7, P61	32
2L	237673	T	C	germline_recurrent	P35, P41, P11, D3, P65, P31, P59, D5, P17, P53, P15, P27, P9, P1, P57, D1, P63, P29, P39, P3, P47, P23, P51, P37, P7, P49, P43, P25, P19, P45a, P55, P33, D7, P61	34
2L	239989	G	A	germline_recurrent	P35, P41, P11, D3, P65, P31, P59, D5, P17, P53, P15, P27, P9, P57, D1, P63, P29, P39, P47, P23, P51, P37, P49, P43, P25, P19, P45a, P55, P33, D7, P61	31
2L	242137	G	A	germline_recurrent	P35, P41, P11, D3, P65, P31, P59, D5, P17, P53, P15, P27, P9, P57, D1, P63, P29, P23, P51, P37, P7, P49, P43, P25, P19, P45a, P55, P33, D7, P61	30
2L	242233	C	T	germline_recurrent	P35, P41, P11, D3, P65, P31, P59, D5, P17, P53, P15, P27, P9, P57, D1, P63, P29, P39, P47, P23, P51, P37, P7, P49, P43, P25, P19, P45a, P55, P33, D7, P61	32
2L	242336	A	G	germline_recurrent	P35, P41, P11, P5, D3, P65, P31, P59, D5, P17, P53, P15, P27, P9, P57, D1, P63, P29, P39, P47, P51, P37, P7, P49, P43, P25, P19, P45a, P55, P33, D7, P61	32
2L	242798	A	C	germline_recurrent	P35, P41, P11, P5, D3, P65, P31, D5, P17, P53, P15, P27, P9, P57, D1, P63, P29, P39, P3, P47, P23, P51, P37, P49, P43, P25, P19, P45a, P55, P33, D7	31
2L	243207	C	T	germline_recurrent	P35, P41, P11, P5, D3, P65, P31, P59, D5, P17, P53, P15, P27, P9, P57, D1, P63, P29, P39, P47, P23, P51, P37, P7, P49, P43, P25, P19, P45a, P55, P33, D7, P61	33
2L	243574	T	G	germline_recurrent	P35, P41, P11, P5, D3, P65, P31, P59, D5, P17, P53, P15, P27, P9, P57, D1, P63, P29, P3, P47, P51, P37, P7, P49, P43, P25, P19, P45a, P55, P33, D7, P61	32
2L	243679	A	G	germline_recurrent	P35, P41, P11, P5, D3, P65, P31, D5, P17, P53, P15, P27, P9, P57, D1, P63, P29, P47, P51, P37, P49, P43, P25, P19, P45a, P55, P33, D7, P61	29
2L	243708	C	T	germline_recurrent	P35, P41, P11, P5, D3, P65, P31, D5, P17, P53, P15, P27, P9, P57, D1, P63, P29, P47, P51, P37, P7, P49, P43, P25, P19, P45a, P55, P33, D7, P61	30
2L	243732	A	C	germline_recurrent	P35, P41, P11, P5, D3, P65, P31, D5, P17, P53, P15, P27, P9, P57, D1, P63, P29, P47, P51, P37, P7, P49, P43, P25, P19, P55, P33, D7, P61	29
2L	243824	A	G	germline_recurrent	P35, P41, P11, D3, P31, D5, P53, P15, P27, P9, P57, D1, P63, P29, P23, P37, P7, P43, P25, P19, P33, D7	22
2L	244268	A	G	germline_recurrent	P35, P41, P11, D3, P65, P31, P59, D5, P17, P53, P15, P27, P9, P57, D1, P63, P29, P39, P47, P51, P37, P49, P43, P19, P45a, P55, P33, D7, P61	29
2L	244368	T	A	germline_recurrent	P35, P41, P11, D3, P65, P31, P59, D5, P17, P53, P15, P27, P9, P57, D1, P63, P29, P39, P47, P23, P51, P37, P49, P43, P25, P19, P45a, P55, P33, D7, P61	31
2L	244878	T	A	germline_recurrent	P35, P41, P11, D3, P65, P31, P59, D5, P53, P15, P27, P9, P57, D1, P63, P29, P39, P47, P23, P51, P37, P49, P43, P25, P19, P45a, P55, P33, D7, P61	30
2L	244894	T	C	germline_recurrent	P35, P41, P11, P5, D3, P65, P31, P59, D5, P53, P15, P27, P9, P57, D1, P63, P29, P39, P47, P23, P51, P37, P49, P43, P25, P19, P45a, P55, P33, D7, P61	31
2L	246001	T	C	germline_recurrent	P35, P41, P11, P5, D3, P65, P31, P59, D5, P17, P53, P15, P27, P9, P57, D1, P63, P29, P39, P47, P23, P51, P37, P7, P49, P43, P25, P19, P45a, P55, P33, D7, P61	33
2L	246173	G	A	germline_recurrent	P35, P41, P11, P5, D3, P65, P31, P59, D5, P53, P15, P27, P9, P57, D1, P63, P29, P3, P47, P23, P37, P49, P43, P25, P19, P45a, P55, P33, D7, P61	30
2L	246490	G	C	germline_recurrent	P35, P41, P11, D3, P65, P31, P59, D5, P17, P53, P15, P27, P9, P57, D1, P63, P29, P47, P23, P51, P37, P7, P49, P43, P25, P19, P45a, P55, P33, D7, P61	31
2L	246872	A	T	germline_recurrent	P35, P41, P11, D3, P65, P31, P59, D5, P17, P53, P15, P27, P9, P57, D1, P63, P29, P39, P47, P23, P51, P37, P49, P43, P25, P19, P45a, P55, P33, D7, P61	31
2L	248839	A	G	germline_recurrent	P35, P41, P11, P5, D3, P65, P31, P59, D5, P17, P53, P15, P27, P9, P1, P57, D1, P63, P29, P3, P47, P23, P51, P37, P7, P49, P43, P25, P19, P45a, P55, P33, D7, P61	34
2L	250554	T	A	germline_recurrent	P35, P41, P11, P65, P31, P59, P53, P15, P27, P9, P57, P63, P29, P39, P47, P23, P51, P37, P7, P49, P43, P25, P19, P45a, P55, P33	26
2L	250955	T	C	germline_recurrent	P35, P41, P11, P5, D3, P65, P31, P59, D5, P53, P15, P27, P9, P57, D1, P63, P29, P47, P51, P37, P49, P43, P19, P45a, P55, P33, D7, P61	28
2L	252466	G	T	germline_recurrent	P35, P41, P11, D3, P65, P31, P59, D5, P53, P15, P27, P9, P57, D1, P63, P29, P39, P51, P37, P49, P43, P19, P45a, P55, P33, D7, P61	27
2L	254355	G	C	germline_recurrent	P35, P41, P11, D3, P65, P31, P59, D5, P53, P15, P27, P9, P57, D1, P63, P29, P39, P47, P23, P51, P37, P7, P49, P43, P25, P19, P45a, P55, P33, D7, P61	31
2L	254434	A	C	germline_recurrent	P35, P41, P11, P5, D3, P65, P31, P59, D5, P53, P15, P27, P9, P57, D1, P63, P29, P39, P47, P23, P51, P37, P7, P49, P43, P25, P19, P45a, P55, P33, D7, P61	32
2L	254456	A	G	germline_recurrent	P35, P41, P11, D3, P65, P31, P59, D5, P17, P53, P15, P27, P9, P57, D1, P63, P29, P39, P47, P23, P51, P37, P7, P49, P43, P25, P19, P45a, P55, P33, D7, P61	32
2L	255265	A	T	germline_recurrent	P35, P41, P11, P5, D3, P65, P31, P59, D5, P53, P15, P27, P9, P57, D1, P63, P29, P51, P37, P49, P43, P25, P19, P33, D7	25
2L	255352	C	A	germline_recurrent	P35, P41, P11, D3, P65, P31, P59, P53, P15, P27, P9, D1, P29, P3, P47, P37, P49, P43, P19, P55, P33, D7, P61	23
2L	255359	T	A	germline_recurrent	P35, P41, P11, D3, P65, P31, P59, P53, P15, P27, P9, D1, P63, P29, P47, P37, P49, P43, P19, P55, P33, D7, P61	23
2L	255398	C	T	germline_recurrent	P35, P41, P11, P5, D3, P65, P31, P59, D5, P53, P15, P27, P9, P57, D1, P63, P29, P47, P37, P49, P43, P19, P45a, P55, P33, D7	26
2L	255472	G	A	germline_recurrent	P35, P41, P11, P5, D3, P65, P31, P59, D5, P17, P53, P15, P27, P9, P57, D1, P63, P29, P39, P3, P47, P23, P51, P37, P7, P49, P43, P25, P19, P45a, P55, P33, D7, P61	34
2L	255511	G	T	germline_recurrent	P35, P41, P11, P5, D3, P65, P31, P59, D5, P17, P53, P15, P27, P9, P57, D1, P63, P29, P3, P23, P37, P49, P43, P25, P19, P45a, P55, P33, D7, P61	30
2L	255539	T	C	germline_recurrent	P35, P41, P11, D3, P65, P31, P59, D5, P17, P53, P15, P27, P9, P1, P57, D1, P63, P29, P3, P23, P37, P49, P43, P25, P19, P45a, P55, P33, D7, P61	30
2L	255952	G	A	germline_recurrent	P35, P41, P11, P5, D3, P65, P31, P59, D5, P17, P53, P15, P27, P9, P57, D1, P63, P29, P47, P23, P51, P37, P7, P49, P43, P25, P19, P55, P33, D7	30
2L	256133	A	G	germline_recurrent	P35, P41, P11, D3, P65, P31, P59, D5, P15, P9, P57, D1, P63, P29, P47, P37, P49, P43, P19, P45a, P55, P33, D7	23
2L	256339	G	A	germline_recurrent	P35, P41, P11, P5, D3, P65, P31, P59, D5, P53, P15, P27, P9, P57, D1, P63, P29, P47, P23, P51, P37, P7, P49, P43, P25, P19, P45a, P55, P33, D7	30
2L	256993	G	A	germline_recurrent	P35, P41, P11, D3, P65, P31, P59, D5, P17, P53, P15, P27, P9, P57, D1, P63, P29, P3, P47, P23, P51, P37, P7, P49, P43, P25, P19, P45a, P55, P33, D7, P61	32
2L	257534	C	G	germline_recurrent	P35, P41, P11, P5, D3, P65, P31, P59, D5, P53, P15, P27, P9, P57, D1, P63, P29, P3, P47, P51, P37, P7, P49, P43, P19, P45a, P55, P33, D7, P61	30
2L	257656	T	C	germline_recurrent	P35, P41, P11, D3, P65, P31, P59, P17, P53, P15, P27, P9, P57, D1, P63, P29, P3, P47, P23, P37, P7, P49, P43, P19, P45a, P55, P33, D7, P61	29
2L	257880	G	C	germline_recurrent	P35, P41, P11, P5, D3, P65, P31, P59, D5, P17, P53, P15, P27, P9, P57, D1, P63, P29, P47, P23, P51, P37, P7, P49, P43, P25, P19, P45a, P55, P33, D7, P61	32
2L	258084	C	T	germline_recurrent	P35, P41, P11, D3, P65, P31, P59, P17, P53, P15, P27, P9, P57, D1, P63, P29, P39, P37, P49, P43, P19, P45a, P55, P33, D7, P61	26
2L	258215	T	G	germline_recurrent	P35, P41, P11, P5, D3, P65, P31, P59, D5, P17, P53, P15, P27, P9, P57, D1, P63, P29, P39, P3, P47, P23, P37, P7, P49, P43, P25, P19, P45a, P55, P33, D7, P61	33
2L	258379	G	A	germline_recurrent	P35, P41, P11, D3, P65, P31, P59, D5, P17, P53, P15, P27, P9, P57, D1, P63, P29, P39, P47, P23, P51, P37, P7, P49, P43, P25, P19, P45a, P55, P33, D7, P61	32
2L	258459	T	G	germline_recurrent	P35, P41, P11, P5, D3, P65, P31, P59, D5, P53, P15, P27, P9, P57, D1, P63, P29, P39, P47, P23, P51, P37, P49, P43, P25, P19, P45a, P55, P33, D7, P61	31
2L	258954	A	G	germline_recurrent	P35, P41, P11, D3, P65, P31, P59, P53, P15, P27, P9, P57, D1, P63, P29, P39, P47, P51, P37, P7, P49, P43, P25, P19, P45a, P55, P33, P61	28
2L	259094	C	T	germline_recurrent	P35, P41, P11, D3, P65, P31, P17, P15, P9, D1, P63, P29, P47, P37, P19, P33	16
2L	259182	C	A	germline_recurrent	P35, P41, P11, P5, D3, P65, P31, P59, P17, P53, P15, P27, P9, D1, P63, P29, P47, P37, P49, P43, P25, P19, P45a, P55, P33, D7	26
2L	259295	A	T	germline_recurrent	P35, P41, P11, P5, D3, P65, P31, P59, D5, P17, P53, P15, P27, P9, P57, D1, P63, P29, P39, P47, P23, P51, P37, P7, P49, P43, P25, P19, P45a, P55, P33, D7, P61	33
2L	259402	A	C	germline_recurrent	P35, P41, P11, P5, D3, P65, P31, P59, D5, P17, P53, P15, P27, P9, P57, D1, P63, P29, P47, P51, P37, P7, P49, P43, P19, P45a, P55, P33, D7, P61	30
2L	259407	A	G	germline_recurrent	P35, P41, P11, P5, D3, P65, P31, P59, D5, P17, P53, P15, P27, P9, P57, D1, P63, P29, P39, P47, P51, P37, P7, P49, P43, P19, P45a, P55, P33, D7, P61	31
2L	259412	T	C	germline_recurrent	P35, P41, P11, P5, D3, P65, P31, P59, D5, P17, P53, P15, P27, P9, P57, D1, P63, P29, P39, P47, P51, P37, P7, P49, P43, P25, P19, P45a, P55, P33, D7, P61	32
2L	259593	G	T	germline_recurrent	P35, P41, P11, P5, D3, P65, P31, P59, P17, P53, P15, P27, P9, D1, P63, P29, P47, P51, P37, P7, P43, P19, P55, P33, D7, P61	26
2L	259613	C	A	germline_recurrent	P35, P41, P11, P5, D3, P65, P31, P59, P17, P53, P15, P9, D1, P63, P29, P47, P51, P37, P7, P43, P19, P55, P33, D7, P61	25
2L	259674	A	G	germline_recurrent	P35, P41, P11, P65, P31, P59, P17, P15, P27, P9, P57, P63, P29, P39, P47, P51, P37, P7, P49, P43, P25, P19, P45a, P55, P33, P61	26
2L	259754	A	G	germline_recurrent	P35, P41, P11, D3, P65, P31, P59, D5, P17, P53, P15, P27, P9, P57, D1, P63, P29, P39, P23, P51, P37, P7, P49, P43, P25, P19, P45a, P33, D7, P61	30
2L	260081	G	T	germline_recurrent	P35, P41, P11, P5, D3, P65, P31, P59, D5, P17, P53, P15, P27, P9, P57, D1, P63, P29, P51, P37, P7, P49, P43, P19, P45a, P55, P33, D7, P61	29
2L	260199	C	A	germline_recurrent	P35, P41, P11, P5, D3, P65, P31, P59, P17, P53, P15, P9, P57, D1, P63, P29, P47, P37, P7, P49, P43, P19, P45a, P33, D7	25
2L	260573	T	G	germline_recurrent	P35, P41, P11, P5, D3, P65, P31, P59, D5, P17, P53, P15, P27, P9, P1, P57, D1, P63, P29, P39, P47, P23, P51, P37, P49, P43, P25, P19, P45a, P55, P33, D7	32
2L	260726	A	T	germline_recurrent	P35, P41, P11, P5, D3, P65, P31, P59, D5, P17, P53, P15, P27, P9, P57, D1, P63, P29, P47, P23, P51, P37, P7, P49, P43, P25, P19, P45a, P55, P33, D7, P61	32
2L	260915	A	G	germline_recurrent	P35, P41, P11, P5, D3, P65, P31, P59, D5, P17, P53, P15, P27, P9, P57, D1, P63, P29, P47, P23, P51, P37, P7, P49, P43, P25, P19, P45a, P55, P33, D7, P61	32
2L	261114	A	C	germline_recurrent	P35, P41, P11, P5, D3, P65, P31, P59, D5, P17, P53, P15, P27, P9, P57, D1, P63, P29, P37, P7, P49, P43, P25, P19, P33, D7, P61	27
2L	261283	T	C	germline_recurrent	P35, P31, P15, P37, P33	5
2L	261534	T	C	germline_recurrent	P35, P41, P11, P5, D3, P31, D5, P15, P9, D1, P63, P29, P37, P43, P33, D7	16
2L	261646	A	G	germline_recurrent	P35, P41, P11, P65, P31, P59, P17, P53, P15, P27, P9, P57, P63, P29, P3, P47, P23, P51, P37, P7, P49, P43, P25, P19, P45a, P55, P33, P61	28
2L	262133	T	A	germline_recurrent	P35, P41, P11, P5, D3, P65, P31, P59, D5, P17, P53, P15, P27, P9, P57, D1, P63, P29, P39, P47, P51, P37, P49, P43, P25, P19, P45a, P55, P33, D7, P61	31
2L	262249	A	T	germline_recurrent	P35, P41, P11, P5, D3, P65, P31, P59, D5, P17, P53, P15, P27, P9, P1, P57, D1, P63, P29, P39, P47, P51, P37, P49, P43, P25, P19, P45a, P55, P33, D7, P61	32
2L	262257	T	G	germline_recurrent	P35, P41, P11, P5, D3, P65, P31, P59, D5, P17, P53, P15, P27, P9, P1, P57, D1, P63, P29, P39, P47, P51, P37, P49, P43, P25, P19, P45a, P55, P33, D7, P61	32
2L	262264	A	T	germline_recurrent	P35, P41, P11, P5, D3, P65, P31, P59, D5, P53, P15, P27, P9, P1, P57, D1, P63, P29, P39, P47, P51, P37, P49, P43, P25, P19, P45a, P55, P33, D7, P61	31
2L	262402	A	C	germline_recurrent	P35, P41, P11, P5, D3, P65, P31, P59, D5, P53, P15, P27, P9, P57, D1, P63, P29, P39, P47, P51, P37, P7, P49, P43, P25, P19, P45a, P55, P33, D7, P61	31
2L	262761	T	C	germline_recurrent	P35, P41, P11, D3, P65, P31, P59, D5, P17, P53, P15, P27, P9, P57, D1, P63, P29, P47, P23, P37, P7, P49, P43, P25, P19, P45a, P55, P33, D7, P61	30
2L	262825	C	A	germline_recurrent	P35, P41, P11, D3, P65, P31, P59, P17, P53, P15, P27, P9, P1, P57, D1, P63, P29, P39, P47, P23, P51, P37, P7, P49, P43, P25, P19, P45a, P55, P33, P61	31
2L	263148	A	G	germline_recurrent	P35, P41, P11, D3, P65, P31, P59, D5, P17, P53, P15, P27, P9, P57, D1, P63, P29, P51, P37, P7, P49, P43, P25, P19, P45a, P33, D7, P61	28
2L	263171	G	C	germline_recurrent	P35, P41, P11, P5, D3, P65, P31, P59, D5, P17, P53, P15, P27, P9, P57, D1, P63, P29, P51, P37, P7, P49, P43, P19, P45a, P33, D7, P61	28
2L	263222	G	A	germline_recurrent	P35, P41, P11, P5, D3, P65, P31, P59, P17, P53, P15, P27, P9, P57, D1, P63, P29, P3, P51, P37, P7, P49, P43, P19, P33, D7, P61	27
2L	263485	A	C	germline_recurrent	P35, P41, P11, D3, P31, P17, P53, P15, P27, P9, P57, D1, P63, P29, P47, P37, P7, P49, P43, P25, P19, P55, P33, P61	24
2L	263587	C	A	germline_recurrent	P35, P41, P11, P5, D3, P65, P31, P59, D5, P17, P53, P15, P27, P9, P57, D1, P63, P29, P23, P51, P37, P7, P49, P43, P25, P19, P45a, P55, P33, D7, P61	31
2L	263817	G	A	germline_recurrent	P35, P41, P11, D3, P65, P31, P59, P17, P53, P15, P27, P9, P57, D1, P63, P29, P39, P47, P23, P51, P37, P7, P49, P43, P25, P19, P45a, P55, P33, P61	30
2L	264313	T	G	germline_recurrent	P35, P41, P11, D3, P65, P31, P59, D5, P17, P53, P15, P27, P9, P57, D1, P63, P29, P23, P51, P37, P49, P43, P25, P19, P55, P33, D7, P61	28
2L	264751	A	G	germline_recurrent	P35, P41, P11, D3, P65, P31, P59, D5, P17, P53, P15, P27, P9, P57, D1, P63, P29, P39, P23, P51, P37, P49, P43, P25, P19, P45a, P55, P33, D7, P61	30
2L	265816	G	T	germline_recurrent	P35, P41, P11, P5, D3, P65, P31, P59, D5, P17, P53, P15, P27, P9, P57, D1, P63, P29, P39, P47, P23, P51, P37, P7, P49, P43, P25, P19, P45a, P55, P33, D7, P61	33
2L	266472	T	C	germline_recurrent	P35, P41, P11, D3, P65, P31, P59, D5, P53, P15, P27, P9, P57, D1, P63, P29, P39, P47, P23, P51, P37, P49, P43, P25, P19, P45a, P55, P33, D7, P61	30
2L	266595	C	T	germline_recurrent	P35, P41, P11, P5, D3, P65, P31, P59, D5, P17, P53, P15, P27, P9, P57, D1, P63, P29, P39, P47, P23, P51, P37, P7, P49, P43, P25, P19, P55, P33, D7, P61	32
2L	266668	T	C	germline_recurrent	P35, P41, P11, P5, D3, P65, P31, P59, D5, P53, P15, P27, P9, P57, D1, P63, P29, P39, P47, P23, P51, P37, P49, P43, P25, P19, P45a, P55, P33, D7, P61	31
2L	267599	G	A	germline_recurrent	P35, P41, P11, D3, P65, P31, P59, P17, P53, P15, P27, P9, P57, D1, P63, P29, P39, P47, P51, P37, P7, P49, P43, P19, P45a, P55, P33, P61	28
2L	267621	T	C	germline_recurrent	P35, P41, P11, D3, P65, P31, P59, D5, P53, P15, P27, P9, P57, D1, P63, P29, P39, P47, P51, P37, P7, P49, P43, P19, P45a, P55, P33, D7, P61	29
2L	267731	T	A	germline_recurrent	P35, P41, P11, P5, D3, P65, P31, P59, P53, P15, P27, P9, P57, D1, P63, P29, P3, P47, P37, P7, P49, P43, P19, P45a, P33, D7, P61	27
2L	267804	G	A	germline_recurrent	P35, P41, P11, P5, D3, P65, P31, P59, D5, P17, P53, P15, P27, P9, P1, P57, D1, P63, P29, P47, P23, P37, P49, P43, P19, P55, P33, D7, P61	29
2L	267992	G	A	germline_recurrent	P35, P41, P11, P5, D3, P65, P31, P59, D5, P53, P15, P27, P9, P57, D1, P63, P29, P47, P23, P37, P49, P43, P25, P19, P45a, P55, P33, D7, P61	29
2L	268120	T	C	germline_recurrent	P35, P41, P11, P5, D3, P65, P31, P59, P17, P53, P15, P27, P9, P57, D1, P63, P29, P23, P51, P37, P49, P43, P25, P19, P45a, P55, P33, P61	28
2L	268230	A	G	germline_recurrent	P35, P41, P11, P5, D3, P65, P31, P59, D5, P17, P53, P15, P27, P9, P57, D1, P63, P29, P39, P47, P51, P37, P49, P43, P19, P45a, P55, P33, D7, P61	30
2L	268406	T	A	germline_recurrent	P35, P41, P11, P5, D3, P65, P31, P59, P53, P15, P27, P9, P57, D1, P63, P29, P23, P37, P7, P49, P43, P25, P19, P45a, P55, P33, P61	27
2L	268424	C	T	germline_recurrent	P35, P41, P11, P5, D3, P65, P31, P59, D5, P17, P53, P15, P27, P9, P57, D1, P63, P29, P39, P3, P47, P23, P51, P37, P49, P43, P25, P19, P45a, P55, P33, D7, P61	33
2L	268430	A	G	germline_recurrent	P35, P41, P11, P5, D3, P65, P31, P59, D5, P17, P53, P15, P27, P9, P57, D1, P63, P29, P39, P47, P23, P51, P37, P49, P43, P25, P19, P55, P33, D7, P61	31
2L	268747	C	T	germline_recurrent	P35, P41, P11, P65, P31, P59, P17, P53, P15, P27, P9, P57, P63, P29, P39, P47, P23, P51, P37, P49, P43, P25, P19, P45a, P55, P33, P61	27
2L	268889	T	A	germline_recurrent	P35, P41, P11, D3, P65, P31, P59, D5, P17, P53, P15, P27, P9, P57, D1, P63, P29, P39, P47, P23, P37, P7, P49, P43, P25, P19, P45a, P55, P33, D7, P61	31
2L	268895	G	A	germline_recurrent	P35, P41, P11, D3, P65, P31, P59, P17, P53, P15, P27, P9, P57, D1, P63, P29, P39, P47, P23, P37, P7, P49, P43, P25, P19, P45a, P55, P33, P61	29
2L	269338	C	A	germline_recurrent	P35, P41, P11, P65, P31, P59, P17, P53, P15, P27, P9, P57, P63, P29, P39, P3, P47, P23, P51, P37, P49, P43, P25, P19, P45a, P55, P33, P61	28
2L	269487	T	C	germline_recurrent	P35, P41, P11, P5, D3, P65, P31, P59, D5, P17, P53, P15, P27, P9, P57, D1, P63, P29, P39, P47, P23, P51, P37, P49, P43, P25, P19, P45a, P55, P33, D7, P61	32
2L	270417	C	T	germline_recurrent	P35, P41, P11, P5, D3, P65, P31, P59, P17, P53, P15, P27, P9, P57, D1, P63, P29, P39, P47, P23, P51, P37, P7, P49, P43, P25, P19, P45a, P55, P33, P61	31
2L	271430	C	G	germline_recurrent	P35, P41, P11, P5, D3, P65, P31, P59, D5, P53, P15, P27, P9, P1, P57, D1, P63, P29, P3, P47, P51, P37, P49, P43, P19, P45a, P55, P33, D7, P61	30
2L	271997	A	G	germline_recurrent	P35, P41, P11, P5, D3, P65, P31, P59, D5, P17, P53, P15, P27, P9, P57, D1, P63, P29, P39, P47, P51, P37, P49, P43, P25, P19, P45a, P55, P33, D7, P61	31
2L	272868	A	G	germline_recurrent	P35, P41, P11, D3, P65, P31, P59, D5, P17, P53, P15, P27, P9, P1, P57, D1, P63, P29, P39, P47, P23, P51, P37, P7, P49, P43, P25, P19, P45a, P55, P33, D7, P61	33
2L	272958	T	C	germline_recurrent	P35, P41, P11, P5, D3, P65, P31, P59, D5, P17, P53, P15, P27, P9, P57, D1, P63, P29, P47, P23, P51, P37, P7, P49, P43, P25, P19, P45a, P55, P33, D7, P61	32
2L	273778	A	C	germline_recurrent	P35, D3, P31, P15, P29, P37, P43, P19, P33	9
2L	274249	T	G	germline_recurrent	P35, P41, P11, P5, D3, P65, P31, P59, D5, P17, P53, P15, P27, P9, P57, D1, P63, P29, P39, P47, P23, P51, P37, P7, P49, P43, P25, P19, P45a, P55, P33, D7, P61	33
2L	274269	A	C	germline_recurrent	P35, P41, P11, D3, P65, P31, P59, P17, P53, P15, P27, P9, P57, D1, P63, P29, P39, P47, P23, P51, P37, P7, P49, P43, P25, P19, P45a, P55, P33, P61	30
2L	275512	G	A	germline_recurrent	P35, P41, P11, P65, P31, P59, P17, P53, P15, P27, P9, P57, P63, P29, P39, P47, P23, P51, P37, P7, P49, P43, P25, P19, P45a, P55, P33, P61	28
2L	275743	T	G	germline_recurrent	P35, P41, P11, P5, D3, P65, P31, P59, D5, P17, P53, P15, P27, P9, P57, D1, P63, P29, P39, P47, P51, P37, P49, P43, P25, P19, P45a, P55, P33, D7, P61	31
2L	275765	T	G	germline_recurrent	P35, P41, P11, P65, P31, P59, P17, P53, P15, P27, P9, P57, P63, P29, P39, P47, P23, P51, P37, P7, P49, P43, P25, P19, P45a, P55, P33, P61	28
2L	276598	A	G	germline_recurrent	P35, P41, P11, P5, D3, P65, P31, D5, P15, P27, P9, P57, D1, P63, P29, P3, P47, P51, P37, P49, P43, P19, P45a, P33, D7	25
2L	276655	T	G	germline_recurrent	P35, P41, P11, P5, D3, P65, P31, P59, D5, P17, P53, P15, P27, P9, P57, D1, P63, P29, P39, P47, P23, P51, P37, P7, P49, P43, P25, P19, P45a, P55, P33, D7, P61	33
2L	276672	T	A	germline_recurrent	P35, P41, P11, P65, P31, P59, P17, P53, P15, P27, P9, P57, P63, P29, P39, P47, P23, P51, P37, P7, P49, P43, P25, P19, P45a, P55, P33, P61	28
2L	276931	T	C	germline_recurrent	P35, P41, P11, P5, D3, P65, P31, P59, D5, P53, P15, P27, P9, P57, D1, P63, P29, P3, P47, P23, P51, P37, P49, P43, P25, P19, P45a, P55, P33, D7, P61	31
2L	277408	A	G	germline_recurrent	P35, P41, P11, P5, D3, P65, P31, D5, P53, P15, P27, P9, P57, D1, P63, P29, P47, P51, P37, P49, P43, P19, P45a, P55, P33, D7, P61	27
2L	277776	A	T	germline_recurrent	P35, P41, P11, P5, D3, P65, P31, P59, D5, P17, P53, P15, P27, P9, P57, D1, P63, P29, P39, P47, P23, P51, P37, P7, P49, P43, P25, P19, P45a, P55, P33, D7, P61	33
2L	278178	C	G	germline_recurrent	P35, P41, P11, P65, P31, P59, P53, P15, P27, P9, P57, P63, P29, P39, P47, P23, P51, P37, P7, P49, P43, P25, P19, P45a, P55, P33, P61	27
2L	278355	A	T	germline_recurrent	P35, P41, P11, D3, P65, P31, P59, D5, P17, P53, P15, P27, P9, P57, D1, P63, P29, P39, P47, P23, P51, P37, P7, P49, P43, P25, P19, P45a, P55, P33, D7, P61	32
2L	278400	G	T	germline_recurrent	P35, P41, P11, P65, P31, P59, P17, P53, P15, P27, P9, P57, P63, P29, P39, P47, P23, P51, P37, P7, P49, P43, P25, P19, P45a, P55, P33, P61	28
2L	278514	T	A	germline_recurrent	P35, P41, P11, D3, P65, P31, P59, D5, P17, P53, P15, P27, P9, P57, D1, P63, P29, P39, P3, P47, P51, P37, P7, P49, P43, P25, P19, P45a, P55, P33, D7, P61	32
2L	279494	T	C	germline_recurrent	P35, P41, P11, P5, D3, P65, P31, P59, D5, P17, P53, P15, P27, P9, P57, D1, P63, P29, P39, P47, P23, P51, P37, P7, P49, P43, P25, P19, P45a, P55, P33, D7, P61	33
2L	279674	C	T	germline_recurrent	P35, P41, P11, P5, D3, P65, P31, P59, D5, P17, P53, P15, P27, P9, P57, D1, P63, P29, P39, P47, P23, P51, P37, P7, P49, P43, P25, P19, P45a, P55, P33, D7, P61	33
2L	279761	T	C	germline_recurrent	P35, P41, P11, P5, D3, P65, P31, P59, D5, P17, P53, P15, P27, P9, P57, D1, P63, P29, P39, P47, P23, P51, P37, P7, P49, P43, P25, P19, P45a, P55, P33, D7, P61	33
2L	279782	C	T	germline_recurrent	P35, P41, P11, P65, P31, P59, P17, P53, P15, P27, P9, P57, P63, P29, P39, P47, P23, P51, P37, P7, P49, P43, P25, P19, P45a, P55, P33, P61	28
2L	280090	C	A	germline_recurrent	P35, P41, P11, P5, D3, P65, P31, P59, D5, P17, P53, P15, P27, P9, P57, D1, P63, P29, P39, P47, P23, P51, P37, P7, P49, P43, P25, P19, P45a, P55, P33, D7, P61	33
2L	280607	G	A	germline_recurrent	P35, P41, P11, P65, P31, P59, P17, P53, P15, P27, P9, P57, P63, P29, P39, P47, P23, P51, P37, P49, P43, P25, P19, P45a, P55, P33, P61	27
2L	281271	C	T	germline_recurrent	P35, P41, P11, P5, D3, P65, P31, P59, D5, P17, P53, P15, P27, P9, P57, D1, P63, P29, P23, P51, P37, P7, P49, P43, P25, P19, P45a, P55, P33, D7, P61	31
2L	281626	T	G	germline_recurrent	P35, P41, P11, P5, D3, P65, P31, P59, D5, P17, P53, P15, P27, P9, P57, D1, P63, P29, P39, P51, P37, P49, P43, P19, P45a, P55, P33, D7, P61	29
2L	281709	C	T	germline_recurrent	P35, P41, P11, P5, D3, P65, P31, P59, D5, P17, P53, P15, P27, P9, P57, D1, P63, P29, P39, P3, P47, P51, P37, P49, P43, P19, P45a, P55, P33, D7, P61	31
2L	282130	A	C	germline_recurrent	P35, P41, P11, P5, D3, P65, P31, P59, D5, P53, P15, P27, P9, P57, D1, P63, P29, P51, P37, P49, P43, P19, P45a, P55, P33, D7, P61	27
2L	282152	C	A	germline_recurrent	P35, P41, P11, P5, D3, P65, P31, P59, D5, P53, P15, P27, P9, P57, D1, P63, P29, P47, P51, P37, P49, P43, P19, P45a, P55, P33, D7, P61	28
2L	282523	C	T	germline_recurrent	P35, P41, P11, D3, P65, P31, P59, D5, P53, P15, P27, P9, P57, D1, P63, P29, P39, P23, P51, P37, P7, P49, P43, P25, P19, P45a, P55, P33, D7, P61	30
2L	282561	A	T	germline_recurrent	P35, P41, P11, P5, D3, P65, P31, P59, D5, P53, P15, P27, P9, P57, D1, P63, P29, P39, P3, P47, P23, P51, P37, P7, P49, P43, P25, P19, P45a, P55, P33, D7, P61	33
2L	282823	C	T	germline_recurrent	P35, P41, P11, P5, D3, P65, P31, P59, D5, P17, P53, P15, P27, P9, P57, D1, P63, P29, P39, P47, P23, P51, P37, P7, P49, P43, P25, P19, P45a, P55, P33, D7, P61	33
2L	283594	T	C	germline_recurrent	P35, P41, P11, P5, D3, P65, P31, P59, P17, P53, P15, P27, P9, P57, D1, P63, P29, P39, P47, P51, P37, P49, P43, P19, P45a, P33, D7, P61	28
2L	283681	T	G	germline_recurrent	P35, P41, P11, P5, D3, P65, P31, P59, P53, P15, P27, P9, P57, D1, P63, P29, P37, P7, P43, P19, P45a, P55, P33, D7, P61	25
2L	283729	T	C	germline_recurrent	P35, P41, P11, P5, D3, P65, P31, P59, D5, P17, P53, P15, P27, P9, P57, D1, P63, P29, P39, P51, P37, P49, P43, P25, P19, P45a, P55, P33, D7, P61	30
2L	283762	A	T	germline_recurrent	P35, P41, P11, P5, D3, P65, P31, P59, D5, P17, P53, P15, P27, P9, P57, D1, P63, P29, P51, P37, P49, P43, P25, P19, P45a, P55, P33, D7, P61	29
2L	284303	T	C	germline_recurrent	P35, P41, P11, P5, D3, P65, P31, P59, D5, P17, P53, P15, P27, P9, P1, P57, D1, P63, P29, P47, P37, P49, P43, P19, P45a, P55, P33, D7, P61	29
2L	284520	T	A	germline_recurrent	P35, P41, P11, P65, P31, P59, P17, P53, P15, P9, P57, P63, P29, P3, P47, P51, P37, P49, P43, P19, P45a, P33	22
2L	284703	A	C	germline_recurrent	P35, P41, P11, P5, D3, P65, P31, P59, D5, P17, P53, P15, P27, P9, P57, D1, P63, P29, P3, P47, P23, P51, P37, P7, P49, P43, P25, P19, P45a, P55, P33, D7, P61	33
2L	284882	A	C	germline_recurrent	P35, P41, P11, P5, D3, P65, P31, P59, D5, P17, P53, P15, P27, P9, P57, D1, P63, P29, P39, P47, P23, P51, P37, P7, P49, P43, P25, P19, P45a, P55, P33, D7, P61	33
2L	285011	A	T	germline_recurrent	P35, P41, P11, P5, D3, P65, P31, P59, D5, P17, P53, P15, P27, P9, P1, P57, D1, P63, P29, P47, P23, P51, P37, P7, P49, P43, P25, P19, P45a, P55, P33, D7, P61	33
2L	285557	A	G	germline_recurrent	P35, P41, P11, D3, P65, P31, P59, D5, P17, P53, P15, P27, P9, P57, D1, P63, P29, P39, P3, P47, P23, P51, P37, P7, P49, P43, P25, P19, P45a, P55, P33, D7, P61	33
2L	285589	C	A	germline_recurrent	P35, P41, P11, P65, P31, P59, P17, P53, P15, P27, P9, P57, P63, P29, P39, P47, P23, P51, P37, P49, P43, P25, P19, P45a, P55, P33, P61	27
2L	285787	A	G	germline_recurrent	P35, P41, P11, D3, P65, P31, P59, D5, P53, P15, P27, P9, P57, D1, P63, P29, P39, P47, P23, P51, P37, P7, P49, P43, P25, P19, P45a, P55, P33, D7, P61	31
2L	285917	G	A	germline_recurrent	P35, P41, P11, P5, D3, P65, P31, P59, D5, P17, P53, P15, P27, P9, P57, D1, P63, P29, P3, P47, P51, P37, P7, P49, P43, P19, P45a, P33, D7, P61	30
2L	286102	T	A	germline_recurrent	P35, P41, P11, P65, P31, P59, P53, P15, P27, P9, P57, P63, P29, P47, P51, P37, P7, P49, P43, P19, P45a, P55, P33, P61	24
2L	286270	C	A	germline_recurrent	P35, P41, P11, D3, P65, P31, P59, D5, P53, P15, P27, P9, P57, D1, P63, P29, P39, P47, P23, P51, P37, P7, P49, P43, P25, P19, P45a, P55, P33, D7, P61	31
2L	286647	T	A	germline_recurrent	P35, P41, P11, D3, P65, P31, P59, D5, P53, P15, P27, P9, P57, D1, P63, P29, P39, P47, P23, P51, P37, P7, P49, P43, P25, P19, P45a, P55, P33, D7, P61	31
2L	286991	T	A	germline_recurrent	P35, P41, P11, D3, P65, P31, P59, D5, P17, P53, P15, P27, P9, P57, D1, P63, P29, P23, P51, P37, P49, P43, P25, P19, P45a, P55, P33, D7, P61	29
2L	287106	T	A	germline_recurrent	P35, P41, P11, P5, D3, P65, P31, P59, D5, P17, P53, P15, P27, P9, P1, P57, D1, P63, P29, P39, P47, P23, P51, P37, P7, P49, P43, P25, P19, P45a, P55, P33, D7, P61	34
2L	287226	T	A	germline_recurrent	P35, P41, P11, D3, P65, P31, P59, P17, P53, P15, P27, P9, P57, D1, P63, P29, P39, P51, P37, P49, P43, P19, P45a, P55, P33, D7, P61	27
2L	289103	C	A	germline_recurrent	P35, P11, P5, P65, P31, P59, P53, P15, P27, P9, P57, P63, P29, P3, P47, P37, P7, P49, P43, P19, P45a, P33, P61	23
2L	289798	A	C	germline_recurrent	P35, P41, P11, P5, D3, P65, P31, P59, D5, P53, P15, P27, P9, P57, D1, P63, P29, P47, P23, P51, P37, P7, P49, P43, P25, P19, P45a, P55, P33, D7, P61	31
2L	289841	C	A	germline_recurrent	P35, P41, P11, P5, D3, P65, P31, P59, D5, P17, P53, P15, P27, P9, P1, P57, D1, P63, P29, P39, P47, P51, P37, P7, P49, P43, P25, P19, P45a, P55, P33, D7, P61	33
2L	289874	G	T	germline_recurrent	P35, P41, P11, P5, D3, P65, P31, P59, D5, P17, P53, P15, P27, P9, P1, P57, D1, P63, P29, P39, P47, P37, P49, P43, P25, P19, P45a, P55, P33, D7, P61	31
2L	289952	G	C	germline_recurrent	P35, P41, P11, P5, D3, P65, P31, P59, D5, P17, P53, P15, P27, P9, P57, D1, P63, P29, P47, P51, P37, P49, P43, P19, P45a, P55, P33, D7, P61	29
2L	291088	T	A	germline_recurrent	P35, P41, P11, P5, D3, P65, P31, P59, D5, P17, P53, P15, P27, P9, P57, D1, P63, P29, P39, P47, P23, P37, P7, P49, P43, P25, P19, P45a, P55, P33, D7, P61	32
2L	292048	G	A	germline_recurrent	P35, P41, P11, P5, D3, P65, P31, P59, D5, P17, P53, P15, P27, P9, P57, D1, P63, P29, P3, P47, P23, P51, P37, P49, P43, P25, P19, P45a, P55, P33, D7, P61	32
2L	292130	T	A	germline_recurrent	P35, P41, P11, D3, P65, P31, P59, D5, P17, P53, P15, P27, P9, P57, D1, P63, P29, P39, P3, P47, P51, P37, P49, P43, P25, P19, P45a, P55, P33, D7, P61	31
2L	292255	G	A	germline_recurrent	P35, P41, P11, D3, P65, P31, P59, D5, P53, P15, P27, P9, P57, D1, P63, P29, P39, P3, P47, P51, P37, P49, P43, P25, P19, P45a, P55, P33, D7, P61	30
2L	292759	A	G	germline_recurrent	P35, P41, P11, P5, D3, P65, P31, P59, D5, P53, P15, P27, P9, P57, D1, P63, P29, P39, P23, P51, P37, P7, P49, P43, P25, P19, P45a, P55, P33, D7, P61	31
2L	292872	C	T	germline_recurrent	P35, P41, P11, P65, P31, P59, P17, P53, P15, P27, P9, P57, P63, P29, P39, P3, P23, P51, P37, P7, P49, P43, P25, P19, P45a, P55, P33, P61	28
2L	292941	G	T	germline_recurrent	P35, P41, P11, P5, D3, P65, P31, P59, D5, P17, P53, P15, P27, P9, P1, P57, D1, P63, P29, P39, P47, P23, P51, P37, P49, P43, P25, P19, P45a, P55, P33, D7, P61	33
2L	293132	C	A	germline_recurrent	P35, P41, P11, P5, D3, P65, P31, P59, D5, P17, P53, P15, P27, P9, P1, P57, D1, P63, P29, P47, P23, P51, P37, P7, P49, P43, P25, P19, P45a, P55, P33, D7, P61	33
2L	293209	C	A	germline_recurrent	P35, P41, P11, P5, D3, P65, P31, P59, D5, P17, P53, P15, P27, P9, P57, D1, P63, P29, P39, P47, P23, P51, P37, P49, P43, P25, P19, P45a, P55, P33, D7, P61	32
2L	293255	G	A	germline_recurrent	P35, P41, P11, P65, P31, P59, P17, P53, P15, P27, P9, P57, P63, P29, P39, P47, P23, P37, P49, P43, P25, P19, P45a, P55, P33, P61	26
2L	293279	G	A	germline_recurrent	P35, P41, P11, P5, D3, P31, P59, D5, P17, P53, P15, P27, P9, P57, D1, P63, P29, P39, P47, P51, P37, P7, P49, P43, P19, P45a, P55, P33, D7, P61	30
2L	293286	G	A	germline_recurrent	P35, P41, P11, P5, D3, P31, P59, D5, P17, P53, P15, P27, P9, P57, D1, P63, P29, P39, P47, P51, P37, P7, P49, P43, P19, P45a, P55, P33, D7, P61	30
2L	293535	A	G	germline_recurrent	P35, P41, P11, P65, P31, P59, P53, P15, P27, P9, P63, P29, P47, P23, P37, P7, P49, P43, P25, P19, P45a, P55, P33	23
2L	295534	G	A	germline_recurrent	P35, P41, P11, D3, P65, P31, P59, D5, P53, P15, P27, P9, P57, D1, P63, P29, P39, P23, P51, P37, P7, P49, P43, P25, P19, P45a, P55, P33, D7, P61	30
2L	295546	C	T	germline_recurrent	P35, P41, P11, D3, P65, P31, P59, D5, P53, P15, P27, P9, P57, D1, P63, P29, P47, P23, P51, P37, P7, P49, P43, P25, P19, P45a, P55, P33, D7, P61	30
2L	295668	C	A	germline_recurrent	P35, P41, P11, P65, P31, P59, P53, P15, P27, P9, P57, P63, P29, P39, P47, P23, P51, P37, P7, P49, P43, P25, P19, P45a, P55, P33, P61	27
2L	295741	A	G	germline_recurrent	P35, P41, P11, D3, P65, P31, P59, D5, P53, P15, P27, P9, P57, D1, P63, P29, P39, P47, P23, P51, P37, P7, P49, P43, P25, P19, P45a, P55, P33, D7, P61	31
2L	296890	G	A	germline_recurrent	P35, P41, P11, P5, D3, P65, P31, P59, D5, P53, P15, P27, P9, P57, D1, P63, P29, P39, P47, P51, P37, P7, P49, P43, P19, P45a, P55, P33, D7, P61	30
2L	297238	C	A	germline_recurrent	P35, P41, P11, P5, D3, P65, P31, P59, D5, P53, P15, P27, P9, P1, P57, D1, P63, P29, P3, P47, P23, P51, P37, P7, P49, P43, P25, P19, P45a, P55, P33, D7, P61	33
2L	297861	C	T	germline_recurrent	P35, P41, P11, D3, P65, P31, P59, D5, P53, P15, P27, P9, P57, D1, P63, P29, P47, P37, P7, P49, P43, P19, P45a, P55, P33, D7, P61	27
2L	297966	T	A	germline_recurrent	P35, P41, P11, D3, P65, P31, P59, D5, P53, P15, P27, P9, P57, D1, P63, P29, P39, P47, P23, P37, P7, P49, P43, P25, P19, P45a, P55, P33, D7, P61	30
2L	298211	G	A	germline_recurrent	P35, P41, P11, D3, P65, P31, P59, D5, P53, P15, P27, P9, P57, D1, P63, P29, P39, P47, P23, P51, P37, P7, P49, P43, P25, P19, P45a, P55, P33, D7, P61	31
2L	298677	C	T	germline_recurrent	P35, P41, P11, P5, D3, P65, P31, P59, D5, P17, P53, P15, P27, P9, P57, D1, P63, P29, P39, P47, P23, P51, P37, P7, P49, P43, P19, P45a, P55, P33, D7, P61	32
2L	298795	C	A	germline_recurrent	P35, P41, P11, P5, D3, P65, P31, P59, P53, P15, P9, D1, P63, P29, P47, P51, P37, P7, P49, P43, P19, P45a, P33, D7, P61	25
2L	298883	A	T	germline_recurrent	P35, P41, P11, D3, P31, P59, P15, P9, D1, P63, P29, P51, P37, P49, P43, P19, D7	17
2L	299334	G	A	germline_recurrent	P35, P41, P11, D3, P65, P31, P59, D5, P17, P53, P15, P27, P9, P57, D1, P63, P29, P39, P47, P51, P37, P7, P49, P43, P25, P19, P45a, P55, P33, D7, P61	31
2L	299382	G	T	germline_recurrent	P35, P41, P11, D3, P65, P31, P59, D5, P17, P53, P15, P27, P9, P57, D1, P63, P29, P47, P23, P51, P37, P7, P49, P43, P25, P19, P45a, P55, P33, D7, P61	31
2L	299415	A	C	germline_recurrent	P35, P41, P11, D3, P65, P31, P59, D5, P17, P53, P15, P27, P9, P57, D1, P63, P29, P39, P47, P23, P51, P37, P7, P49, P43, P25, P19, P45a, P55, P33, D7, P61	32
2L	299661	C	T	germline_recurrent	P35, P41, P11, P65, P31, P59, P17, P53, P15, P27, P9, P57, P63, P29, P39, P47, P23, P51, P37, P7, P49, P43, P25, P19, P55, P33, P61	27
2L	299935	A	T	germline_recurrent	P35, P41, P11, P5, D3, P65, P31, P59, P17, P53, P15, P27, P9, P57, D1, P63, P29, P39, P47, P51, P37, P49, P43, P19, P45a, P55, P33, D7, P61	29
2L	299940	T	A	germline_recurrent	P35, P41, P11, P5, D3, P65, P31, P59, P17, P53, P15, P27, P9, P57, D1, P63, P29, P39, P47, P51, P37, P49, P43, P19, P45a, P55, P33, D7, P61	29
2L	300026	A	C	germline_recurrent	P35, P41, P11, P5, P65, P31, P59, P17, P53, P15, P27, P9, P57, P63, P29, P47, P51, P37, P7, P49, P43, P19, P45a, P55, P33, P61	26
2L	300337	G	T	germline_recurrent	P35, P41, P11, P65, P31, P59, P17, P53, P15, P27, P9, P57, P63, P29, P47, P23, P51, P37, P7, P49, P43, P25, P19, P45a, P55, P33, P61	27
2L	300522	A	T	germline_recurrent	P35, P41, P11, P5, D3, P65, P31, P59, D5, P53, P15, P27, P9, P57, D1, P63, P29, P39, P3, P47, P23, P51, P37, P49, P43, P19, P45a, P55, P33, D7, P61	31
2L	300582	C	A	germline_recurrent	P35, P41, P11, P65, P31, P59, P17, P53, P15, P27, P9, P57, P63, P29, P39, P47, P23, P37, P7, P49, P43, P19, P45a, P55, P33, P61	26
2L	301009	G	T	germline_recurrent	P35, P41, P11, P5, D3, P65, P31, P59, D5, P53, P15, P27, P9, P57, D1, P63, P29, P47, P23, P51, P37, P7, P49, P43, P25, P19, P45a, P55, P33, D7, P61	31
2L	301191	T	C	germline_recurrent	P35, P41, P11, D3, P65, P31, P59, D5, P17, P53, P15, P27, P9, P57, D1, P63, P29, P39, P47, P23, P51, P37, P49, P43, P25, P19, P45a, P55, P33, D7, P61	31
2L	301297	G	A	germline_recurrent	P35, P41, P11, P65, P31, P59, P17, P53, P15, P27, P9, P57, P63, P29, P39, P47, P23, P51, P37, P7, P49, P43, P25, P19, P45a, P55, P33, P61	28
2L	301417	T	A	germline_recurrent	P35, P41, P11, D3, P65, P31, P59, D5, P17, P53, P15, P27, P9, P57, D1, P63, P29, P39, P47, P23, P51, P37, P7, P49, P43, P25, P19, P45a, P55, P33, D7, P61	32
2L	301738	T	C	germline_recurrent	P35, P41, P11, D3, P65, P31, P59, D5, P17, P53, P15, P27, P9, P1, P57, D1, P63, P29, P39, P47, P51, P37, P7, P49, P43, P25, P19, P45a, P55, P33, D7, P61	32
2L	302001	C	A	germline_recurrent	P35, P41, P11, P65, P31, P59, P17, P53, P15, P27, P9, P57, P63, P29, P47, P51, P37, P7, P49, P43, P25, P19, P45a, P55, P33, P61	26
2L	302509	C	T	germline_recurrent	P35, P41, P11, D3, P65, P31, P59, D5, P17, P53, P15, P27, P9, P57, D1, P63, P29, P47, P23, P51, P37, P7, P49, P43, P25, P19, P45a, P55, P33, D7, P61	31
2L	302872	A	C	germline_recurrent	P35, P41, P11, P65, P31, P59, P17, P53, P15, P27, P9, P57, P63, P29, P39, P47, P23, P51, P37, P7, P49, P43, P25, P19, P45a, P55, P33, P61	28
2L	303439	G	A	germline_recurrent	P35, P41, P11, P5, D3, P31, P59, P17, P53, P15, P9, D1, P63, P29, P3, P47, P51, P37, P49, P43, P19, P45a, P33, D7	24
2L	304187	A	C	germline_recurrent	P35, P41, P11, P65, P31, P59, P17, P53, P15, P27, P9, P1, P57, P63, P29, P3, P47, P37, P49, P43, P19, P45a, P33, P61	24
2L	305149	A	G	germline_recurrent	P35, P41, P11, P5, D3, P31, P59, D5, P17, P53, P15, P27, P9, P57, D1, P63, P29, P47, P23, P37, P7, P49, P43, P25, P19, P45a, P55, P33, D7, P61	30
2L	305601	C	T	germline_recurrent	P35, P41, P11, P65, P31, P59, P17, P53, P15, P27, P9, P57, P63, P29, P47, P37, P7, P49, P43, P25, P19, P45a, P55, P33	24
2L	305626	C	T	germline_recurrent	P35, P41, P11, P5, D3, P65, P31, P59, D5, P17, P53, P15, P27, P9, P57, D1, P63, P29, P39, P47, P37, P7, P49, P43, P25, P19, P45a, P55, P33, D7, P61	31
2L	305847	C	G	germline_recurrent	P35, P41, P11, P5, D3, P65, P31, P59, D5, P17, P53, P15, P27, P9, P57, D1, P63, P29, P47, P51, P37, P7, P49, P43, P19, P45a, P55, P33, D7, P61	30
2L	306420	T	G	germline_recurrent	P35, P41, P11, P5, D3, P31, D5, P53, P15, P27, P9, P57, D1, P63, P29, P3, P37, P7, P49, P43, P25, P19, P33, D7	24
2L	306546	G	A	germline_recurrent	P35, P11, P5, P31, D5, P53, P27, P9, D1, P63, P29, P37, P49, P43, P19, P33, D7	17
2L	306792	A	G	germline_recurrent	P35, P11, D3, P31, P17, P15, P9, D1, P29, P37, P7, P33, D7	13
2L	307160	C	A	germline_recurrent	P35, P41, P11, P65, P31, P59, P53, P15, P27, P9, P57, P63, P29, P37, P7, P49, P43, P25, P19, P55, P33	21
2L	308016	A	G	germline_recurrent	P35, P41, P11, D3, P65, P31, P59, D5, P53, P15, P27, P9, P57, D1, P63, P29, P23, P37, P49, P43, P25, P19, P45a, P55, P33, D7, P61	27
2L	308108	T	C	germline_recurrent	P35, P41, P11, P5, D3, P65, P31, P59, D5, P53, P15, P27, P9, P57, D1, P63, P29, P39, P51, P37, P7, P49, P43, P25, P19, P45a, P55, P33, D7, P61	30
2L	308188	G	C	germline_recurrent	P35, P41, P11, P5, D3, P65, P31, P59, D5, P53, P15, P27, P9, P57, D1, P63, P29, P39, P47, P23, P51, P37, P49, P43, P25, P19, P45a, P55, P33, D7, P61	31
2L	308645	A	G	germline_recurrent	P35, P41, P11, D3, P65, P31, P59, D5, P17, P53, P15, P27, P9, P57, D1, P63, P29, P39, P47, P23, P51, P37, P49, P43, P25, P19, P45a, P55, P33, D7, P61	31
2L	308885	A	T	germline_recurrent	P35, P41, P11, P5, D3, P65, P31, P59, D5, P17, P53, P15, P27, P9, P57, D1, P63, P29, P39, P23, P51, P37, P7, P49, P43, P25, P19, P45a, P55, P33, D7, P61	32
2L	309205	T	A	germline_recurrent	P35, P41, P11, P5, D3, P65, P31, P59, D5, P53, P15, P27, P9, P57, D1, P63, P29, P39, P23, P51, P37, P7, P49, P43, P25, P19, P45a, P55, P33, D7, P61	31
2L	309372	C	G	germline_recurrent	P35, P41, P11, P5, D3, P65, P31, P59, D5, P17, P53, P15, P27, P9, P57, D1, P63, P29, P47, P23, P51, P37, P7, P49, P43, P25, P19, P45a, P55, P33, D7, P61	32
2L	309559	G	A	germline_recurrent	P35, P41, P11, P5, D3, P65, P31, P59, D5, P17, P53, P15, P27, P9, P57, D1, P63, P29, P51, P37, P7, P49, P43, P19, P45a, P55, P33, D7, P61	29
2L	310715	T	C	germline_recurrent	P35, P41, P11, D3, P65, P31, P59, D5, P17, P53, P15, P27, P9, P57, D1, P63, P29, P47, P23, P37, P7, P49, P43, P25, P19, P45a, P55, P33, D7	29
2L	310892	C	T	germline_recurrent	P35, P41, P11, P5, D3, P65, P31, P59, D5, P17, P53, P15, P27, P9, P57, D1, P63, P29, P39, P47, P23, P37, P7, P49, P43, P25, P19, P45a, P55, P33, D7, P61	32
2L	311316	T	A	germline_recurrent	P35, P41, P11, P5, P65, P31, P59, P17, P53, P15, P27, P9, P57, P63, P29, P39, P47, P51, P37, P7, P49, P43, P19, P45a, P55, P33, P61	27
2L	311856	A	C	germline_recurrent	P35, P41, P11, P5, D3, P65, P31, P59, D5, P53, P15, P27, P9, P57, D1, P63, P29, P39, P47, P23, P51, P37, P7, P49, P43, P25, P19, P45a, P55, P33, D7, P61	32
2L	312064	A	C	germline_recurrent	P35, P41, P11, P65, P31, P59, P17, P53, P15, P27, P9, P57, P63, P29, P39, P47, P23, P51, P37, P7, P49, P43, P25, P19, P45a, P55, P33, P61	28
2L	312750	G	A	germline_recurrent	P35, P41, P11, P5, D3, P65, P31, P59, D5, P53, P15, P27, P9, P1, P57, D1, P63, P29, P39, P3, P47, P51, P37, P7, P49, P43, P25, P19, P45a, P55, P33, D7, P61	33
2L	312814	G	A	germline_recurrent	P35, P41, P11, P5, D3, P65, P31, P59, D5, P53, P15, P27, P9, P57, D1, P63, P29, P39, P3, P47, P23, P51, P37, P7, P49, P43, P25, P19, P45a, P55, P33, D7, P61	33
2L	312971	T	C	germline_recurrent	P35, P41, P11, P5, D3, P65, P31, P59, D5, P53, P15, P27, P9, P57, D1, P63, P29, P39, P47, P23, P51, P37, P7, P49, P43, P25, P19, P45a, P55, P33, D7, P61	32
2L	313379	G	T	germline_recurrent	P35, P41, P11, P5, D3, P65, P31, P59, D5, P53, P15, P27, P9, P57, D1, P63, P29, P39, P47, P23, P51, P37, P49, P43, P25, P19, P45a, P55, P33, D7, P61	31
2L	313620	C	T	germline_recurrent	P35, P41, P11, P5, P31, P59, P53, P15, P27, P9, P57, P63, P29, P47, P23, P51, P37, P7, P49, P43, P25, P19, P45a, P55, P33, P61	26
2L	313656	T	C	germline_recurrent	P35, P41, P11, P65, P31, P59, P53, P15, P27, P9, P1, P57, P63, P29, P47, P23, P51, P37, P49, P43, P25, P19, P45a, P55, P33, P61	26
2L	313826	G	T	germline_recurrent	P35, P41, P11, P5, P65, P31, P59, P53, P15, P27, P9, P57, P63, P29, P47, P51, P37, P7, P49, P43, P25, P19, P45a, P55, P33, P61	26
2L	314013	A	C	germline_recurrent	P35, P41, P11, P65, P31, P59, P53, P15, P27, P9, P57, P63, P29, P23, P37, P49, P43, P25, P19, P55, P33, P61	22
2L	314410	A	G	germline_recurrent	P35, P41, P11, P5, P65, P31, P59, P53, P15, P27, P9, P57, P63, P29, P47, P23, P37, P7, P49, P43, P19, P45a, P55, P33	24
2L	314601	T	A	germline_recurrent	P35, P41, P11, P5, D3, P65, P31, P59, D5, P53, P15, P27, P9, P57, D1, P63, P29, P47, P51, P37, P7, P49, P43, P19, P45a, P55, P33, D7, P61	29
2L	314638	C	T	germline_recurrent	P35, P41, P11, D3, P65, P31, P59, D5, P53, P15, P27, P9, P57, D1, P63, P29, P47, P51, P37, P7, P49, P43, P19, P45a, P55, P33, D7, P61	28
2L	315338	A	C	germline_recurrent	P35, P41, P11, D3, P65, P31, P59, D5, P53, P15, P27, P9, P57, D1, P63, P29, P47, P37, P49, P43, P25, P19, P45a, P55, P33, D7, P61	27
2L	315566	C	A	germline_recurrent	P35, P41, P11, P65, P31, P59, P53, P15, P27, P9, P57, P63, P29, P3, P47, P37, P49, P43, P25, P19, P45a, P55, P33	23
2L	315787	A	T	germline_recurrent	P35, P41, P11, P5, D3, P65, P31, P59, P53, P15, P9, D1, P63, P29, P37, P7, P49, P43, P19, P33, D7	21
2L	315831	A	G	germline_recurrent	P35, P41, P11, P5, D3, P65, P31, P59, P17, P15, P9, D1, P63, P29, P47, P37, P7, P49, P43, P19, P33, D7	22
2L	315930	T	G	germline_recurrent	P35, P11, P5, P31, P9, P29, P37, P33	8
2L	316427	T	G	germline_recurrent	P35, P41, P11, P31, P59, P53, P15, P27, P9, P57, P63, P29, P47, P23, P51, P37, P49, P43, P25, P19, P45a, P55, P33, P61	24
2L	316452	G	T	germline_recurrent	P35, P41, P11, D3, P31, P59, D5, P53, P15, P27, P9, P57, D1, P63, P29, P23, P51, P37, P49, P43, P25, P19, P45a, P55, P33, D7	26
2L	316664	A	C	germline_recurrent	P35, P41, P11, P5, D3, P65, P31, P59, D5, P17, P53, P15, P27, P9, P1, P57, D1, P63, P29, P39, P3, P23, P51, P37, P7, P49, P43, P25, P19, P45a, P55, P33, D7, P61	34
2L	316722	A	T	germline_recurrent	P35, P41, P11, P5, D3, P65, P31, P59, D5, P17, P53, P15, P27, P9, P1, P57, D1, P63, P29, P39, P3, P47, P23, P51, P37, P7, P49, P43, P25, P19, P45a, P55, P33, D7, P61	35
2L	317827	C	T	germline_recurrent	P35, P41, P11, P5, D3, P65, P31, P59, D5, P17, P53, P15, P27, P9, P57, D1, P63, P29, P47, P23, P37, P7, P49, P43, P25, P19, P45a, P55, P33, D7, P61	31
2L	317836	T	C	germline_recurrent	P35, P41, P11, P5, D3, P65, P31, P59, D5, P17, P53, P15, P27, P9, P57, D1, P63, P29, P47, P23, P37, P7, P49, P43, P25, P19, P45a, P55, P33, D7, P61	31
2L	318282	T	A	germline_recurrent	P35, P41, P11, P65, P31, P59, P15, P27, P9, P57, P63, P29, P47, P37, P49, P43, P25, P19, P45a, P33	20
2L	318309	T	C	germline_recurrent	P35, P41, P11, P65, P31, P59, P53, P15, P27, P9, P63, P29, P37, P49, P43, P25, P19, P45a, P33	19
2L	318650	T	G	germline_recurrent	P35, P41, P11, D3, P65, P31, P59, D5, P17, P53, P15, P27, P9, P57, D1, P63, P29, P39, P47, P23, P51, P37, P7, P49, P43, P25, P19, P45a, P55, P33, D7, P61	32
2L	318859	T	C	germline_recurrent	P35, P41, P11, D3, P65, P31, P59, D5, P17, P53, P15, P27, P9, P57, D1, P63, P29, P39, P47, P23, P51, P37, P7, P49, P43, P25, P19, P45a, P55, P33, D7, P61	32
2L	319257	T	A	germline_recurrent	P35, P41, P11, P5, D3, P65, P31, P59, D5, P17, P53, P15, P27, P9, P57, D1, P63, P29, P39, P47, P23, P51, P37, P7, P49, P43, P25, P19, P45a, P55, P33, D7, P61	33
2L	319449	A	C	germline_recurrent	P35, P41, P11, P5, D3, P65, P31, P59, D5, P17, P53, P15, P27, P9, P57, D1, P63, P29, P39, P3, P47, P23, P37, P7, P49, P43, P25, P19, P45a, P55, P33, D7, P61	33
2L	319469	C	A	germline_recurrent	P35, P41, P11, P5, D3, P65, P31, P59, D5, P17, P53, P15, P27, P9, P57, D1, P63, P29, P39, P3, P47, P23, P51, P37, P7, P49, P43, P25, P19, P45a, P55, P33, D7, P61	34
2L	319580	G	A	germline_recurrent	P35, P41, P11, P5, D3, P65, P31, P59, D5, P17, P53, P15, P27, P9, P57, D1, P63, P29, P3, P47, P51, P37, P7, P49, P43, P19, P45a, P55, P33, D7, P61	31
2L	319650	A	T	germline_recurrent	P35, P41, P11, P5, D3, P65, P31, P59, P17, P53, P15, P9, P57, D1, P63, P29, P3, P47, P51, P37, P7, P49, P43, P19, P45a, P33, D7, P61	28
2L	320066	G	A	germline_recurrent	P35, P41, P11, P65, P31, P59, P17, P53, P15, P27, P9, P1, P57, P63, P29, P39, P3, P47, P23, P51, P37, P49, P43, P25, P19, P45a, P55, P33, P61	29
2L	320229	C	G	germline_recurrent	P35, P41, P11, P5, D3, P65, P31, P59, D5, P17, P53, P15, P27, P9, P1, P57, D1, P63, P29, P39, P3, P47, P23, P51, P37, P49, P43, P25, P19, P45a, P55, P33, D7, P61	34
2L	321117	G	T	germline_recurrent	P35, P41, P11, D3, P65, P31, P59, D5, P17, P53, P15, P27, P9, P57, D1, P63, P29, P47, P23, P51, P37, P49, P43, P25, P19, P45a, P55, P33, D7, P61	30
2L	321251	C	T	germline_recurrent	P35, P41, P11, P5, D3, P65, P31, P59, D5, P17, P53, P15, P27, P9, P57, D1, P63, P29, P39, P47, P23, P51, P37, P7, P49, P43, P25, P19, P45a, P55, P33, D7, P61	33
2L	321369	G	A	germline_recurrent	P35, P41, P11, P65, P31, P59, P17, P53, P15, P27, P9, P57, P63, P29, P39, P47, P23, P51, P37, P7, P49, P43, P25, P19, P45a, P55, P33, P61	28
2L	321394	T	C	germline_recurrent	P35, P41, P11, D3, P65, P31, P59, D5, P53, P15, P27, P9, P57, D1, P63, P29, P39, P47, P23, P51, P37, P7, P49, P43, P25, P19, P45a, P55, P33, D7, P61	31
2L	321801	T	G	germline_recurrent	P35, P41, P11, P5, D3, P65, P31, P59, P17, P53, P15, P27, P9, P57, D1, P63, P29, P39, P47, P51, P37, P7, P49, P43, P19, P45a, P55, P33, D7, P61	30
2L	321810	A	G	germline_recurrent	P35, P41, P11, P5, D3, P65, P31, P59, P17, P53, P15, P27, P9, P57, D1, P63, P29, P39, P47, P51, P37, P7, P49, P43, P19, P45a, P55, P33, D7, P61	30
2L	322370	C	T	germline_recurrent	P35, P41, P11, P5, D3, P65, P31, P59, D5, P53, P15, P27, P9, P57, D1, P63, P29, P39, P47, P23, P51, P37, P7, P49, P43, P25, P19, P45a, P55, P33, D7, P61	32
2L	322751	C	G	germline_recurrent	P35, P41, P11, P5, D3, P65, P31, P59, D5, P17, P53, P15, P27, P9, P57, D1, P63, P29, P39, P47, P23, P51, P37, P7, P49, P43, P25, P19, P45a, P55, P33, D7, P61	33
2L	322793	A	T	germline_recurrent	P35, P41, P11, D3, P65, P31, P59, D5, P17, P53, P15, P27, P9, P57, D1, P63, P29, P39, P47, P23, P51, P37, P7, P49, P43, P25, P19, P45a, P55, P33, D7, P61	32
2L	323052	C	A	germline_recurrent	P35, P41, P11, D3, P65, P31, P59, D5, P17, P53, P15, P27, P9, P57, D1, P63, P29, P47, P23, P51, P37, P7, P49, P43, P25, P19, P55, P33, D7, P61	30
2L	323155	A	G	germline_recurrent	P35, P41, P11, D3, P65, P31, P59, D5, P17, P53, P15, P27, P9, P57, D1, P63, P29, P39, P3, P47, P23, P51, P37, P7, P49, P43, P25, P19, P45a, P55, P33, D7, P61	33
2L	323195	C	G	germline_recurrent	P35, P41, P11, P5, D3, P65, P31, P59, D5, P17, P53, P15, P27, P9, P1, P57, D1, P63, P29, P39, P47, P23, P51, P37, P7, P49, P43, P25, P19, P45a, P55, P33, D7, P61	34
2L	323577	A	G	germline_recurrent	P35, P41, P11, P5, D3, P65, P31, P59, D5, P17, P53, P15, P27, P9, P57, D1, P63, P29, P39, P47, P23, P51, P37, P7, P49, P43, P25, P19, P45a, P55, P33, D7, P61	33
2L	323605	A	G	germline_recurrent	P35, P41, P11, P5, D3, P65, P31, P59, D5, P17, P53, P15, P27, P9, P57, D1, P63, P29, P39, P47, P23, P51, P37, P7, P49, P43, P25, P19, P45a, P55, P33, D7, P61	33
2L	323633	T	A	germline_recurrent	P35, P41, P11, P5, D3, P65, P31, P59, D5, P17, P53, P15, P27, P9, P57, D1, P63, P29, P39, P47, P23, P51, P37, P7, P49, P43, P25, P19, P45a, P55, P33, D7, P61	33
2L	323931	A	G	germline_recurrent	P35, P41, P11, P5, D3, P65, P31, P59, D5, P17, P53, P15, P27, P9, P57, D1, P63, P29, P39, P47, P23, P51, P37, P7, P49, P43, P25, P19, P45a, P55, P33, D7, P61	33
2L	324007	A	C	germline_recurrent	P35, P41, P11, D3, P65, P31, P59, D5, P53, P15, P27, P9, P1, P57, D1, P63, P29, P39, P47, P23, P51, P37, P7, P49, P43, P25, P19, P45a, P55, P33, D7, P61	32
2L	324027	C	T	germline_recurrent	P35, P41, P11, P5, D3, P65, P31, P59, D5, P53, P15, P27, P9, P1, P57, D1, P63, P29, P39, P47, P51, P37, P49, P43, P25, P19, P45a, P55, P33, D7, P61	31
2L	324338	A	C	germline_recurrent	P35, P41, P11, P5, D3, P65, P31, P59, D5, P17, P53, P15, P27, P9, P57, D1, P63, P29, P39, P47, P23, P51, P37, P49, P43, P25, P19, P45a, P55, P33, D7, P61	32
2L	324753	C	G	germline_recurrent	P35, P41, P11, D3, P65, P31, P59, D5, P17, P53, P15, P27, P9, P57, D1, P63, P29, P39, P47, P23, P51, P37, P7, P49, P43, P25, P19, P45a, P55, P33, D7, P61	32
2L	324930	T	G	germline_recurrent	P35, P41, P11, P65, P31, P59, P17, P53, P15, P27, P9, P57, P63, P29, P39, P47, P23, P51, P37, P7, P49, P43, P25, P19, P45a, P55, P33, P61	28
2L	324944	T	G	germline_recurrent	P35, P41, P11, P5, D3, P65, P31, P59, D5, P17, P53, P15, P27, P9, P57, D1, P63, P29, P39, P47, P23, P51, P37, P7, P49, P43, P25, P19, P45a, P55, P33, D7, P61	33
2L	324951	A	C	germline_recurrent	P35, P41, P11, P5, P65, P31, P59, P17, P53, P15, P27, P9, P57, P63, P29, P39, P47, P23, P37, P7, P49, P43, P25, P19, P45a, P55, P33, P61	28
2L	325087	T	C	germline_recurrent	P35, P41, P11, D3, P65, P31, P59, D5, P17, P53, P15, P27, P9, P57, D1, P63, P29, P47, P23, P51, P37, P49, P43, P25, P19, P55, P33, D7, P61	29
2L	325497	G	T	germline_recurrent	P35, P41, P11, P5, D3, P65, P31, P59, D5, P53, P15, P27, P9, P57, D1, P63, P29, P3, P47, P23, P51, P37, P49, P43, P25, P19, P55, P33, D7, P61	30
2L	325884	G	A	germline_recurrent	P35, P41, P11, D3, P65, P31, P59, D5, P53, P15, P27, P9, P57, D1, P63, P29, P39, P3, P47, P23, P51, P37, P49, P43, P25, P19, P45a, P55, P33, D7, P61	31
2L	326145	G	T	germline_recurrent	P35, P41, P11, P5, P65, P31, P59, P17, P53, P15, P27, P9, P1, P57, P63, P29, P39, P47, P51, P37, P49, P43, P19, P45a, P55, P33, P61	27
2L	326180	G	A	germline_recurrent	P35, P41, P11, P5, P65, P31, P59, P17, P53, P15, P27, P9, P1, P57, P63, P29, P39, P47, P51, P37, P7, P49, P43, P19, P45a, P55, P33, P61	28
2L	326198	C	T	germline_recurrent	P35, P41, P11, P65, P31, P59, P17, P53, P15, P27, P9, P1, P57, P63, P29, P39, P51, P37, P7, P49, P43, P19, P55, P33, P61	25
2L	326244	C	A	germline_recurrent	P35, P41, P11, D3, P65, P31, P59, D5, P17, P53, P15, P27, P9, P57, D1, P63, P29, P39, P47, P51, P37, P7, P49, P43, P25, P19, P55, P33, D7, P61	30
2L	326280	T	C	germline_recurrent	P35, P41, P11, D3, P65, P31, P59, D5, P17, P53, P15, P27, P9, P57, D1, P63, P29, P39, P47, P51, P37, P7, P49, P43, P25, P19, P45a, P55, P33, D7, P61	31
2L	326314	C	G	germline_recurrent	P35, P41, P11, P65, P31, P59, P17, P53, P15, P27, P9, P57, P63, P29, P39, P47, P51, P37, P7, P49, P43, P25, P19, P45a, P55, P33, P61	27
2L	326335	C	G	germline_recurrent	P35, P41, P11, P65, P31, P59, P17, P53, P15, P27, P9, P57, P63, P29, P39, P47, P51, P37, P7, P49, P43, P25, P19, P45a, P55, P33, P61	27
2L	326586	A	G	germline_recurrent	P35, P41, P11, P65, P31, P59, P17, P53, P15, P27, P9, P57, P63, P29, P39, P3, P47, P23, P51, P37, P49, P43, P25, P19, P45a, P55, P33, P61	28
2L	326800	T	C	germline_recurrent	P35, P41, P11, P5, D3, P65, P31, P59, D5, P17, P53, P15, P27, P9, P1, P57, D1, P63, P29, P39, P47, P23, P51, P37, P7, P49, P43, P25, P19, P45a, P55, P33, D7, P61	34
2L	326855	G	A	germline_recurrent	P35, P41, P11, P5, D3, P65, P31, P59, D5, P53, P15, P27, P9, P57, D1, P63, P29, P39, P47, P23, P51, P37, P49, P43, P25, P19, P45a, P55, P33, D7, P61	31
2L	326979	A	G	germline_recurrent	P35, P41, P11, P5, D3, P65, P31, P59, D5, P17, P53, P15, P27, P9, P57, D1, P63, P29, P39, P47, P23, P51, P37, P49, P43, P25, P19, P45a, P55, P33, D7, P61	32
2L	327018	A	T	germline_recurrent	P35, P41, P11, P5, D3, P65, P31, P59, D5, P17, P53, P15, P27, P9, P57, D1, P63, P29, P39, P47, P51, P37, P49, P43, P25, P19, P45a, P55, P33, D7, P61	31
2L	327023	G	A	germline_recurrent	P35, P41, P11, P5, D3, P65, P31, P59, D5, P17, P53, P15, P27, P9, P57, D1, P63, P29, P39, P47, P51, P37, P49, P43, P25, P19, P45a, P55, P33, D7, P61	31
2L	327204	A	C	germline_recurrent	P35, P41, P11, P5, D3, P65, P31, P59, D5, P17, P53, P15, P27, P9, P57, D1, P63, P29, P39, P47, P23, P51, P37, P7, P49, P43, P25, P19, P45a, P55, P33, D7, P61	33
2L	327276	T	A	germline_recurrent	P35, P41, P11, P5, D3, P65, P31, P59, D5, P17, P53, P15, P27, P9, P57, D1, P63, P29, P3, P47, P23, P51, P37, P49, P43, P25, P19, P45a, P55, P33, D7, P61	32
2L	327625	A	G	germline_recurrent	P35, P41, P11, D3, P65, P31, P59, D5, P17, P53, P15, P27, P9, P57, D1, P63, P29, P39, P3, P47, P23, P51, P37, P7, P49, P43, P25, P19, P45a, P55, P33, D7, P61	33
2L	328247	T	C	germline_recurrent	P35, P41, P11, P5, D3, P65, P31, P59, D5, P17, P53, P15, P27, P9, P57, D1, P63, P29, P39, P3, P47, P23, P51, P37, P49, P43, P25, P19, P45a, P55, P33, D7, P61	33
2L	329350	T	C	germline_recurrent	P35, P41, P11, P65, P31, P59, P17, P53, P15, P27, P9, P57, P63, P29, P39, P47, P23, P51, P37, P7, P49, P43, P25, P19, P45a, P55, P33, P61	28
2L	329494	A	G	germline_recurrent	P35, P41, P11, P5, D3, P65, P31, P59, D5, P53, P15, P27, P9, P57, D1, P63, P29, P39, P47, P23, P51, P37, P7, P49, P43, P25, P19, P45a, P55, P33, D7, P61	32
2L	329551	A	T	germline_recurrent	P35, P41, P11, P5, D3, P65, P31, P59, D5, P17, P53, P15, P27, P9, P57, D1, P63, P29, P39, P47, P23, P51, P37, P49, P43, P25, P19, P45a, P55, P33, D7, P61	32
2L	329590	G	A	germline_recurrent	P35, P41, P11, P5, D3, P65, P31, P59, D5, P17, P53, P15, P27, P9, P57, D1, P63, P29, P3, P47, P23, P51, P37, P49, P43, P25, P19, P45a, P55, P33, D7, P61	32
2L	329600	G	T	germline_recurrent	P35, P41, P11, P5, D3, P65, P31, P59, D5, P17, P53, P15, P27, P9, P57, D1, P63, P29, P47, P23, P51, P37, P49, P43, P25, P19, P45a, P55, P33, D7, P61	31
2L	329809	C	T	germline_recurrent	P35, P41, P11, P5, D3, P65, P31, P59, D5, P17, P53, P15, P27, P9, P57, D1, P63, P29, P39, P47, P51, P37, P7, P49, P43, P25, P19, P45a, P55, P33, D7, P61	32
2L	329822	A	C	germline_recurrent	P35, P41, P11, P65, P31, P59, P17, P53, P15, P27, P9, P57, P63, P29, P39, P47, P51, P37, P7, P49, P43, P25, P19, P45a, P55, P33, P61	27
2L	329839	A	C	germline_recurrent	P35, P41, P11, P5, D3, P65, P31, P59, D5, P17, P53, P15, P27, P9, P1, P57, D1, P63, P29, P39, P51, P37, P7, P49, P43, P25, P19, P45a, P55, P33, D7, P61	32
2L	329858	A	C	germline_recurrent	P35, P41, P11, P5, D3, P65, P31, P59, D5, P17, P53, P15, P27, P9, P57, D1, P63, P29, P39, P51, P37, P7, P49, P43, P25, P19, P45a, P55, P33, D7, P61	31
2L	329941	T	C	germline_recurrent	P35, P41, P11, P5, D3, P65, P31, P59, D5, P17, P53, P15, P27, P9, P57, D1, P63, P29, P39, P51, P37, P49, P43, P19, P45a, P55, P33, D7, P61	29
2L	330117	C	T	germline_recurrent	P35, P41, P11, P5, P65, P31, P59, P17, P53, P15, P27, P9, P57, P63, P29, P47, P23, P51, P37, P7, P49, P43, P25, P19, P45a, P55, P33, P61	28
2L	330215	T	C	germline_recurrent	P35, P41, P11, P5, D3, P65, P31, P59, D5, P17, P53, P15, P27, P9, P57, D1, P63, P29, P39, P47, P23, P51, P37, P7, P49, P43, P25, P19, P45a, P55, P33, D7, P61	33
2L	330228	G	A	germline_recurrent	P35, P41, P11, P5, D3, P65, P31, P59, D5, P17, P53, P15, P27, P9, P57, D1, P63, P29, P39, P47, P23, P51, P37, P49, P43, P25, P19, P45a, P55, P33, D7, P61	32
2L	330803	T	C	germline_recurrent	P35, P41, P11, P5, D3, P65, P31, P59, D5, P17, P53, P15, P27, P9, P57, D1, P63, P29, P39, P47, P51, P37, P7, P49, P43, P19, P45a, P55, P33, D7, P61	31
2L	330853	T	C	germline_recurrent	P35, P41, P11, P5, D3, P65, P31, P59, D5, P17, P53, P15, P27, P9, P57, D1, P63, P29, P39, P3, P47, P23, P51, P37, P7, P49, P43, P19, P45a, P55, P33, D7, P61	33
2L	330906	C	A	germline_recurrent	P35, P41, P11, P5, D3, P65, P31, P59, D5, P17, P53, P15, P27, P9, P57, D1, P63, P29, P39, P47, P23, P51, P37, P7, P49, P43, P19, P45a, P55, P33, D7, P61	32
2L	331027	T	C	germline_recurrent	P35, P41, P11, D3, P65, P31, P59, D5, P17, P53, P15, P27, P9, P57, D1, P63, P29, P39, P47, P51, P37, P7, P49, P43, P25, P19, P45a, P55, P33, D7, P61	31
2L	331380	C	A	germline_recurrent	P35, P41, P11, P65, P31, P59, P53, P15, P27, P9, P57, P63, P29, P39, P47, P23, P51, P37, P7, P49, P43, P25, P19, P45a, P55, P33, P61	27
2L	331581	A	T	germline_recurrent	P35, P41, P11, P65, P31, P59, P53, P15, P27, P9, P57, P63, P29, P39, P47, P23, P51, P37, P7, P49, P43, P25, P19, P45a, P55, P33, P61	27
2L	331638	A	G	germline_recurrent	P35, P41, P11, P65, P31, P59, P53, P15, P27, P9, P57, P63, P29, P39, P47, P23, P51, P37, P7, P49, P43, P25, P19, P45a, P55, P33, P61	27
2L	331747	G	C	germline_recurrent	P35, P41, P11, D3, P65, P31, P59, D5, P53, P15, P27, P9, P57, D1, P63, P29, P39, P47, P23, P51, P37, P49, P43, P25, P19, P45a, P55, P33, D7, P61	30
2L	331987	A	C	germline_recurrent	P35, P41, P11, P65, P31, P59, P53, P15, P27, P9, P57, P63, P29, P39, P47, P23, P51, P37, P7, P49, P43, P25, P19, P45a, P55, P33, P61	27
2L	332105	G	A	germline_recurrent	P35, P41, P11, P65, P31, P59, P17, P53, P15, P27, P9, P57, P63, P29, P47, P51, P37, P7, P49, P43, P25, P19, P45a, P55, P33, P61	26
2L	332208	A	C	germline_recurrent	P35, P41, P11, D3, P65, P31, P59, P17, P53, P15, P27, P9, P57, D1, P63, P29, P47, P51, P37, P7, P49, P43, P19, P45a, P33, D7, P61	27
2L	332273	T	A	germline_recurrent	P35, P41, P11, P5, D3, P65, P31, P59, P17, P53, P15, P27, P9, P57, D1, P63, P29, P39, P3, P47, P51, P37, P7, P49, P43, P19, P45a, P55, P33, D7, P61	31
2L	332361	T	C	germline_recurrent	P35, P41, P11, P5, D3, P65, P31, P59, D5, P17, P53, P15, P27, P9, P57, D1, P63, P29, P39, P3, P47, P51, P37, P49, P43, P19, P45a, P55, P33, D7, P61	31
2L	332381	C	T	germline_recurrent	P35, P41, P11, P5, D3, P65, P31, P59, D5, P17, P53, P15, P27, P9, P57, D1, P63, P29, P39, P47, P51, P37, P49, P43, P25, P19, P45a, P55, P33, D7, P61	31
2L	332515	G	A	germline_recurrent	P35, P41, P11, P5, D3, P65, P31, P59, D5, P53, P15, P27, P9, P57, D1, P63, P29, P51, P37, P49, P43, P19, P55, P33, D7, P61	26
2L	332672	C	T	germline_recurrent	P35, P41, P11, P65, P31, P59, P53, P15, P27, P9, P57, P63, P29, P23, P51, P37, P7, P49, P43, P25, P19, P45a, P55, P33, P61	25
2L	332907	G	A	germline_recurrent	P35, P41, P11, P5, D3, P65, P31, P59, D5, P53, P15, P27, P9, P1, P57, D1, P63, P29, P39, P47, P23, P51, P37, P7, P49, P43, P25, P19, P55, P33, D7, P61	32
2L	333077	A	C	germline_recurrent	P35, P41, P11, D3, P65, P31, P59, D5, P17, P53, P15, P27, P9, P57, D1, P63, P29, P39, P47, P23, P51, P37, P7, P49, P43, P25, P19, P45a, P55, P33, D7, P61	32
2L	333212	G	A	germline_recurrent	P35, P41, P11, P5, P65, P31, P59, P53, P15, P27, P9, P57, P63, P29, P39, P23, P51, P37, P7, P49, P43, P25, P19, P33, P61	25
2L	333346	T	C	germline_recurrent	P35, P41, P11, P5, D3, P65, P31, P59, D5, P53, P15, P27, P9, P57, D1, P63, P29, P39, P23, P51, P37, P7, P49, P43, P25, P19, P45a, P55, P33, D7, P61	31
2L	333423	C	A	germline_recurrent	P35, P41, P11, P5, D3, P65, P31, P59, D5, P17, P53, P15, P27, P9, P57, D1, P63, P29, P39, P51, P37, P7, P49, P43, P25, P19, P45a, P55, P33, D7, P61	31
2L	333590	T	A	germline_recurrent	P35, P41, P11, D3, P65, P31, P59, D5, P53, P15, P27, P9, P57, D1, P63, P29, P39, P47, P51, P37, P49, P43, P25, P19, P45a, P55, P33, D7, P61	29
2L	333667	A	T	germline_recurrent	P35, P41, P11, D3, P65, P31, P59, D5, P17, P53, P15, P27, P9, P57, D1, P63, P29, P3, P23, P51, P37, P49, P43, P25, P19, P45a, P55, P33, D7, P61	30
2L	333924	C	A	germline_recurrent	P35, P41, P11, D3, P65, P31, P59, D5, P53, P15, P27, P9, P57, D1, P63, P29, P39, P23, P51, P37, P7, P49, P43, P25, P19, P45a, P55, P33, D7, P61	30
2L	334096	G	T	germline_recurrent	P35, P41, P11, P65, P31, P59, P53, P15, P27, P9, P57, P63, P29, P39, P47, P23, P51, P37, P7, P49, P43, P25, P19, P45a, P55, P33, P61	27
2L	334394	T	A	germline_recurrent	P35, P41, P11, P65, P31, P59, P17, P53, P15, P27, P9, P57, P63, P29, P39, P47, P23, P51, P37, P7, P49, P43, P25, P19, P45a, P55, P33, P61	28
2L	334500	G	T	germline_recurrent	P35, P41, P11, P65, P31, P59, P53, P15, P27, P9, P57, P63, P29, P39, P47, P23, P51, P37, P7, P49, P43, P25, P19, P45a, P55, P33, P61	27
2L	334986	A	C	germline_recurrent	P35, P41, P11, P5, D3, P65, P31, P59, D5, P17, P53, P15, P27, P9, P57, D1, P63, P29, P39, P23, P51, P37, P7, P49, P43, P25, P19, P45a, P55, P33, D7, P61	32
2L	335152	A	G	germline_recurrent	P35, P11, P5, D3, P31, P59, D5, P53, P15, P27, P9, P57, D1, P63, P29, P23, P37, P49, P43, P25, P33, D7	22
2L	335706	C	T	germline_recurrent	P35, P41, P11, D3, P65, P31, P59, D5, P17, P53, P15, P27, P9, P57, D1, P63, P29, P39, P47, P51, P37, P7, P49, P43, P25, P19, P45a, P55, P33, D7, P61	31
2L	335752	A	T	germline_recurrent	P35, P41, P11, P5, D3, P65, P31, P59, D5, P53, P15, P27, P9, P57, D1, P63, P29, P39, P47, P23, P51, P37, P7, P49, P43, P25, P19, P45a, P55, P33, D7, P61	32
2L	336093	G	A	germline_recurrent	P35, P41, P11, P5, D3, P65, P31, P59, D5, P17, P53, P15, P27, P9, P57, D1, P63, P29, P3, P47, P23, P51, P37, P7, P49, P43, P25, P19, P55, P33, D7, P61	32
2L	336183	G	A	germline_recurrent	P35, P41, P11, P5, P65, P31, P59, P17, P53, P15, P27, P9, P57, P63, P29, P39, P23, P51, P37, P7, P49, P43, P25, P19, P45a, P55, P33, P61	28
2L	336508	T	C	germline_recurrent	P35, P41, P11, D3, P65, P31, P59, D5, P17, P53, P15, P27, P9, P57, D1, P63, P29, P39, P47, P23, P51, P37, P49, P43, P25, P19, P45a, P55, P33, D7, P61	31
2L	336614	T	C	germline_recurrent	P35, P41, P11, P65, P31, P59, P17, P53, P15, P27, P9, P57, P63, P29, P39, P47, P23, P51, P37, P7, P49, P43, P25, P19, P55, P33, P61	27
2L	336662	C	A	germline_recurrent	P35, P41, P11, P65, P31, P59, P17, P53, P15, P27, P9, P57, P63, P29, P39, P47, P23, P51, P37, P7, P49, P43, P25, P19, P45a, P55, P33, P61	28
2L	336730	A	G	germline_recurrent	P35, P41, P11, D3, P65, P31, P59, D5, P17, P53, P15, P27, P9, P57, D1, P63, P29, P39, P47, P23, P51, P37, P7, P49, P43, P25, P19, P45a, P55, P33, D7, P61	32
2L	336792	G	T	germline_recurrent	P35, P41, P11, D3, P65, P31, P59, D5, P17, P53, P15, P27, P9, P57, D1, P63, P29, P39, P47, P23, P51, P37, P49, P43, P25, P19, P45a, P55, P33, D7, P61	31
2L	337209	G	A	germline_recurrent	P35, P41, P11, D3, P65, P31, P59, D5, P17, P53, P15, P27, P9, P57, D1, P63, P29, P39, P47, P23, P51, P37, P7, P49, P43, P25, P19, P45a, P55, P33, D7, P61	32
2L	337220	T	A	germline_recurrent	P35, P41, P11, D3, P65, P31, P59, D5, P17, P53, P15, P27, P9, P57, D1, P63, P29, P39, P47, P23, P51, P37, P7, P49, P43, P25, P19, P45a, P55, P33, D7, P61	32
2L	337346	T	C	germline_recurrent	P35, P41, P11, P5, D3, P65, P31, P59, D5, P17, P53, P15, P27, P9, P57, D1, P63, P29, P39, P47, P51, P37, P49, P43, P25, P19, P45a, P55, P33, D7, P61	31
2L	337444	A	T	germline_recurrent	P35, P41, P11, P5, P65, P31, P59, P17, P53, P15, P27, P9, P57, P63, P29, P39, P47, P23, P51, P37, P7, P49, P43, P25, P19, P45a, P55, P33, P61	29
2L	337448	T	C	germline_recurrent	P35, P41, P11, P5, D3, P65, P31, P59, D5, P17, P53, P15, P27, P9, P57, D1, P63, P29, P39, P47, P23, P51, P37, P49, P43, P25, P19, P45a, P55, P33, D7, P61	32
2L	337525	C	T	germline_recurrent	P35, P41, P11, P5, D3, P65, P31, P59, D5, P17, P53, P15, P27, P9, P57, D1, P63, P29, P39, P47, P51, P37, P49, P43, P25, P19, P45a, P55, P33, D7, P61	31
2L	337583	C	A	germline_recurrent	P35, P41, P11, P5, D3, P65, P31, P59, P53, P15, P27, P9, P57, D1, P63, P29, P47, P51, P37, P7, P49, P19, P45a, P33, D7	25
2L	337841	G	A	germline_recurrent	P35, P41, P11, P5, D3, P65, P31, P59, D5, P53, P15, P27, P9, P57, D1, P63, P29, P39, P3, P23, P51, P37, P7, P49, P43, P25, P19, P45a, P55, P33, D7, P61	32
2L	338305	C	G	germline_recurrent	P35, P41, P11, P5, D3, P65, P31, P59, P17, P53, P15, P27, P9, P57, D1, P63, P29, P47, P51, P37, P7, P49, P43, P25, P19, P45a, P33, D7, P61	29
2L	338520	A	C	germline_recurrent	P35, P41, P11, P5, D3, P65, P31, P59, D5, P17, P53, P15, P27, P9, P57, D1, P63, P29, P3, P47, P23, P51, P37, P7, P49, P43, P25, P19, P45a, P55, P33, D7, P61	33
2L	339145	C	T	germline_recurrent	P35, P41, P11, P5, D3, P65, P31, P59, D5, P53, P15, P27, P9, P57, D1, P63, P29, P39, P47, P51, P37, P7, P49, P43, P25, P19, P45a, P55, P33, D7, P61	31
2L	339266	G	A	germline_recurrent	P35, P41, P11, P65, P31, P59, P17, P53, P15, P27, P9, P57, P63, P29, P47, P23, P51, P37, P7, P49, P43, P25, P19, P55, P33, P61	26
2L	339392	G	T	germline_recurrent	P35, P41, P11, P5, D3, P65, P31, P59, D5, P53, P15, P27, P9, P57, D1, P63, P29, P39, P47, P23, P51, P37, P7, P49, P43, P25, P19, P45a, P55, P33, D7, P61	32
2L	339423	C	T	germline_recurrent	P35, P41, P11, P5, P65, P31, P59, P53, P15, P27, P9, P57, P63, P29, P39, P47, P23, P51, P37, P7, P49, P43, P25, P19, P55, P33, P61	27
2L	339514	T	C	germline_recurrent	P35, P41, P11, D3, P65, P31, P59, D5, P17, P53, P15, P27, P9, P57, D1, P63, P29, P47, P23, P51, P37, P49, P43, P25, P19, P45a, P55, P33, D7, P61	30
2L	339800	A	G	germline_recurrent	P35, P41, P11, P5, D3, P65, P31, P59, D5, P17, P53, P15, P27, P9, P57, D1, P63, P29, P47, P51, P37, P49, P43, P25, P19, P45a, P55, P33, D7, P61	30
2L	340037	A	C	germline_recurrent	P35, P41, P11, P5, P65, P31, P59, P17, P53, P15, P27, P9, P57, P63, P29, P39, P3, P47, P23, P51, P37, P49, P43, P25, P19, P45a, P55, P33, P61	29
2L	340369	A	T	germline_recurrent	P35, P41, P11, P5, P65, P31, P59, P17, P53, P15, P27, P9, P57, P63, P29, P47, P51, P37, P49, P43, P19, P45a, P55, P33, P61	25
2L	340570	C	G	germline_recurrent	P35, P41, P11, P5, D3, P31, P17, P15, P9, D1, P63, P29, P37, P43, P19, P33, D7	17
2L	340628	C	T	germline_recurrent	P35, P41, P11, P5, D3, P65, P31, P15, P9, D1, P63, P51, P37, P49, P43, P19, D7	17
2L	340737	G	C	germline_recurrent	P35, P41, P11, P5, D3, P65, P31, P59, D5, P17, P53, P15, P27, P9, P57, D1, P63, P29, P39, P51, P37, P7, P49, P43, P25, P19, P55, P33, D7, P61	30
2L	340937	A	C	germline_recurrent	P35, P41, P11, P5, D3, P65, P31, P59, D5, P17, P53, P15, P27, P9, P57, D1, P63, P29, P39, P47, P51, P37, P7, P49, P43, P19, P45a, P55, P33, D7, P61	31
2L	341158	A	T	germline_recurrent	P35, P41, P11, P5, D3, P65, P31, P59, D5, P17, P53, P15, P27, P9, P57, D1, P63, P29, P39, P47, P23, P51, P37, P49, P43, P25, P19, P45a, P55, P33, D7, P61	32
2L	341194	A	G	germline_recurrent	P35, P41, P11, P5, D3, P65, P31, P59, D5, P53, P15, P27, P9, P57, D1, P63, P29, P39, P47, P23, P51, P37, P7, P49, P43, P25, P19, P45a, P55, P33, D7, P61	32
2L	341242	A	T	germline_recurrent	P35, P41, P11, P5, D3, P65, P31, P59, D5, P53, P15, P27, P9, P57, D1, P63, P29, P39, P3, P47, P23, P51, P37, P7, P49, P43, P25, P19, P45a, P55, P33, D7, P61	33
2L	341757	A	G	germline_recurrent	P35, P41, P11, P5, D3, P65, P31, P59, D5, P17, P53, P15, P27, P9, P57, D1, P63, P29, P39, P47, P23, P51, P37, P7, P49, P43, P25, P19, P45a, P55, P33, D7, P61	33
2L	341897	T	G	germline_recurrent	P35, P41, P11, P5, D3, P65, P31, P59, D5, P53, P15, P27, P9, P57, D1, P63, P29, P39, P47, P23, P51, P37, P7, P49, P43, P25, P19, P45a, P55, P33, D7, P61	32
2L	341992	C	G	germline_recurrent	P35, P41, P11, P5, D3, P65, P31, P59, D5, P17, P53, P15, P27, P9, P57, D1, P63, P29, P39, P47, P23, P51, P37, P7, P49, P43, P25, P19, P45a, P55, P33, D7, P61	33
2L	341998	A	G	germline_recurrent	P35, P41, P11, P5, D3, P65, P31, P59, D5, P17, P53, P15, P27, P9, P57, D1, P63, P29, P39, P47, P23, P51, P37, P7, P49, P43, P25, P19, P45a, P55, P33, D7, P61	33
2L	342098	A	C	germline_recurrent	P35, P41, P11, P5, D3, P65, P31, P59, D5, P17, P53, P15, P27, P9, P57, D1, P63, P29, P47, P51, P37, P7, P49, P43, P19, P45a, P55, P33, D7, P61	30
2L	342394	T	C	germline_recurrent	P35, P41, P11, P5, D3, P65, P31, P59, P53, P15, P27, P9, P57, D1, P63, P29, P51, P37, P7, P49, P43, P19, P45a, P55, P33, D7, P61	27
2L	342423	A	G	germline_recurrent	P35, P41, P11, D3, P65, P31, P59, P53, P15, P27, P9, P57, D1, P63, P29, P47, P51, P37, P7, P49, P43, P25, P19, P45a, P33, D7, P61	27
2L	342549	T	C	germline_recurrent	P35, P41, P11, D3, P65, P31, P59, D5, P17, P53, P15, P27, P9, P57, D1, P63, P29, P39, P47, P23, P51, P37, P7, P49, P43, P25, P19, P45a, P55, P33, D7, P61	32
2L	342562	T	C	germline_recurrent	P35, P41, P11, D3, P65, P31, P59, D5, P17, P53, P15, P27, P9, P57, D1, P63, P29, P39, P47, P23, P51, P37, P7, P49, P43, P25, P19, P45a, P55, P33, D7, P61	32
2L	342858	T	G	germline_recurrent	P35, P41, P11, P5, D3, P65, P31, P59, D5, P17, P53, P15, P27, P9, P57, D1, P63, P29, P39, P3, P23, P51, P37, P49, P43, P25, P19, P45a, P55, P33, D7, P61	32
2L	343158	A	C	germline_recurrent	P35, P41, P11, P5, D3, P65, P31, P59, D5, P17, P53, P15, P27, P9, P57, D1, P63, P29, P39, P47, P23, P51, P37, P7, P49, P43, P25, P19, P45a, P55, P33, D7, P61	33
2L	344985	T	A	germline_recurrent	P35, P41, P11, P5, D3, P65, P31, P59, D5, P53, P15, P27, P9, P57, D1, P63, P29, P47, P23, P51, P37, P49, P43, P25, P19, P55, P33, D7, P61	29
2L	345166	A	G	germline_recurrent	P35, P41, P11, D3, P65, P31, P59, D5, P17, P53, P15, P27, P9, P57, D1, P63, P29, P39, P47, P23, P51, P37, P7, P49, P43, P25, P19, P45a, P55, P33, D7, P61	32
2L	345190	C	G	germline_recurrent	P35, P41, P11, P5, D3, P65, P31, P59, D5, P17, P53, P15, P27, P9, P57, D1, P63, P29, P39, P47, P23, P51, P37, P7, P49, P43, P25, P19, P45a, P55, P33, D7, P61	33
2L	345207	A	C	germline_recurrent	P35, P41, P11, D3, P65, P31, P59, D5, P17, P53, P15, P27, P9, P57, D1, P63, P29, P39, P47, P23, P51, P37, P49, P43, P25, P19, P45a, P55, P33, D7, P61	31
2L	345229	C	G	germline_recurrent	P35, P41, P11, D3, P65, P31, P59, D5, P17, P53, P15, P27, P9, P57, D1, P63, P29, P39, P47, P23, P51, P37, P49, P43, P25, P19, P45a, P55, P33, D7, P61	31
2L	345421	C	T	germline_recurrent	P35, P41, P11, P65, P31, P59, P53, P15, P27, P9, P57, P63, P29, P39, P47, P23, P51, P37, P7, P49, P43, P25, P19, P45a, P55, P33, P61	27
2L	345756	T	C	germline_recurrent	P35, P41, P11, P65, P31, P59, P17, P53, P15, P27, P9, P57, P63, P29, P39, P3, P47, P51, P37, P49, P43, P25, P19, P45a, P55, P33, P61	27
2L	346252	C	T	germline_recurrent	P35, P41, P11, P5, D3, P65, P31, P59, D5, P53, P15, P27, P9, P57, D1, P63, P29, P47, P51, P37, P49, P43, P25, P19, P45a, P55, P33, D7, P61	29
2L	346425	T	C	germline_recurrent	P35, P41, P11, P5, D3, P65, P31, P59, D5, P17, P53, P15, P27, P9, P1, P57, D1, P63, P29, P39, P3, P47, P23, P51, P37, P49, P43, P25, P19, P45a, P55, P33, D7, P61	34
2L	346605	C	A	germline_recurrent	P35, P41, P11, P5, D3, P65, P31, P59, D5, P17, P53, P15, P27, P9, P57, D1, P63, P29, P3, P47, P51, P37, P49, P43, P19, P45a, P55, P33, D7, P61	30
2L	346672	A	T	germline_recurrent	P35, P41, P11, D3, P65, P31, P59, D5, P53, P15, P27, P9, P1, P57, D1, P63, P29, P39, P47, P23, P51, P37, P49, P43, P25, P19, P45a, P55, P33, D7, P61	31
2L	347113	A	C	germline_recurrent	P35, P41, P11, P5, D3, P65, P31, P59, D5, P17, P53, P15, P27, P9, P57, D1, P63, P29, P39, P47, P23, P51, P37, P49, P43, P25, P19, P45a, P55, P33, P61	31
2L	347246	C	A	germline_recurrent	P35, P41, P11, P5, D3, P65, P31, P59, D5, P17, P53, P15, P27, P9, P57, D1, P63, P29, P47, P37, P49, P43, P25, P19, P45a, P55, P33, D7	28
2L	347385	G	A	germline_recurrent	P35, P41, P11, P5, D3, P65, P31, P59, D5, P17, P53, P15, P27, P9, P57, D1, P63, P29, P47, P51, P37, P7, P49, P43, P19, P45a, P55, P33, D7	29
2L	355957	C	T	germline_recurrent	P35, P41, P11, P5, D3, P65, P31, P59, D5, P17, P53, P15, P27, P9, P57, D1, P63, P29, P39, P47, P23, P51, P37, P7, P49, P43, P25, P19, P45a, P55, P33, D7, P61	33
2L	356206	C	T	germline_recurrent	P35, P41, P11, D3, P65, P31, P59, D5, P17, P53, P15, P27, P9, P57, D1, P63, P29, P39, P47, P23, P51, P37, P49, P43, P25, P19, P45a, P55, P33, D7	30
2L	356221	T	A	germline_recurrent	P35, P41, P11, D3, P65, P31, P59, D5, P17, P53, P15, P27, P9, P57, D1, P63, P29, P39, P47, P23, P51, P37, P49, P43, P25, P19, P45a, P55, P33, D7, P61	31
2L	366640	A	T	germline_recurrent	P35, P41, P11, P65, P31, P59, P53, P15, P27, P9, P57, P63, P29, P39, P47, P23, P51, P37, P7, P49, P43, P25, P19, P45a, P55, P33, P61	27
2L	367246	G	A	germline_recurrent	P35, P41, P11, P65, P31, P59, P17, P53, P15, P27, P9, P57, P63, P29, P39, P47, P23, P51, P37, P7, P49, P43, P25, P19, P45a, P55, P33, P61	28
2L	367416	G	A	germline_recurrent	P35, P41, P11, P65, P31, P59, P17, P53, P15, P27, P9, P57, P63, P29, P39, P47, P23, P51, P37, P7, P49, P43, P25, P19, P45a, P55, P33, P61	28
2L	371253	G	T	germline_recurrent	P35, P41, P11, D3, P65, P31, P59, D5, P17, P53, P15, P27, P9, P57, D1, P63, P29, P39, P3, P47, P23, P51, P37, P7, P49, P43, P25, P19, P45a, P55, P33, D7, P61	33
2L	371772	T	G	germline_recurrent	P35, P41, P11, P5, D3, P65, P31, P59, D5, P17, P53, P15, P27, P9, P57, D1, P63, P29, P47, P23, P51, P37, P49, P43, P19, P45a, P55, P33, D7, P61	30
2L	371936	T	C	germline_recurrent	P35, P41, P11, D3, P65, P31, P59, D5, P17, P53, P15, P27, P9, P57, D1, P63, P29, P39, P47, P23, P37, P7, P49, P43, P25, P19, P45a, P55, P33, D7, P61	31
2L	372188	A	G	germline_recurrent	P35, P41, P11, P5, D3, P65, P31, P59, D5, P17, P53, P15, P27, P9, P57, D1, P63, P29, P47, P51, P37, P7, P49, P43, P19, P45a, P55, P33, D7, P61	30
2L	372198	C	G	germline_recurrent	P35, P41, P11, P5, D3, P65, P31, P59, D5, P17, P53, P15, P27, P9, P1, P57, D1, P63, P29, P47, P51, P37, P7, P49, P43, P19, P45a, P55, P33, D7, P61	31
2L	373319	A	G	germline_recurrent	P35, P41, P11, P5, D3, P65, P31, P59, D5, P17, P53, P15, P27, P9, P57, D1, P63, P29, P47, P23, P51, P37, P49, P43, P25, P19, P45a, P55, P33, D7, P61	31
2L	374693	A	T	germline_recurrent	P35, P11, D3, P65, P31, P59, D5, P15, P9, D1, P63, P29, P3, P37, P7, P49, P43, P25, P19, P33, D7, P61	22
2L	374736	C	A	germline_recurrent	P35, P41, P11, D3, P65, P31, P59, D5, P17, P15, P27, P9, P57, D1, P63, P29, P51, P37, P7, P49, P43, P25, P19, P33, D7, P61	26
2L	375898	C	G	germline_recurrent	P35, P41, P11, D3, P65, P31, P59, D5, P17, P53, P15, P27, P9, P57, D1, P63, P29, P39, P3, P47, P23, P51, P37, P7, P49, P43, P25, P19, P45a, P55, P33, D7, P61	33
2L	375966	C	T	germline_recurrent	P35, P41, P11, D3, P65, P31, P59, D5, P17, P53, P15, P27, P9, P57, D1, P63, P29, P39, P47, P23, P51, P37, P7, P49, P43, P25, P19, P45a, P55, P33, D7, P61	32
2L	376430	C	T	germline_recurrent	P35, P41, P11, P5, D3, P65, P31, P59, D5, P17, P53, P15, P27, P9, P57, D1, P63, P29, P47, P23, P51, P37, P7, P49, P43, P25, P19, P45a, P55, P33, D7, P61	32
2L	376463	C	T	germline_recurrent	P35, P41, P11, P5, D3, P65, P31, P59, D5, P17, P53, P15, P27, P9, P57, D1, P63, P29, P47, P23, P51, P37, P49, P43, P25, P19, P45a, P55, P33, D7, P61	31
2L	376529	C	T	germline_recurrent	P35, P41, P11, P65, P31, P59, P17, P53, P15, P27, P9, P57, P63, P29, P39, P47, P23, P51, P37, P49, P43, P25, P19, P45a, P55, P33, P61	27
2L	377273	T	A	germline_recurrent	P35, P41, P11, P5, D3, P65, P31, P59, D5, P17, P53, P15, P27, P9, P57, D1, P63, P29, P39, P47, P23, P51, P37, P49, P43, P25, P19, P45a, P55, P33, D7, P61	32
2L	377582	A	G	germline_recurrent	P35, P41, P11, P65, P31, P59, P17, P53, P15, P27, P9, P57, P63, P29, P39, P47, P51, P37, P49, P43, P25, P19, P45a, P55, P33, P61	26
2L	378236	G	A	germline_recurrent	P35, P41, P11, P65, P31, P59, P17, P53, P15, P27, P9, P57, P63, P29, P39, P47, P23, P51, P37, P49, P43, P25, P19, P45a, P55, P33, P61	27
2L	379087	A	G	germline_recurrent	P35, P41, P11, P5, D3, P65, P31, P59, D5, P17, P53, P15, P27, P9, P57, D1, P63, P29, P39, P3, P47, P23, P51, P37, P49, P43, P25, P19, P45a, P55, P33, D7, P61	33
2L	379346	G	A	germline_recurrent	P35, P41, P11, P5, D3, P65, P31, P59, D5, P53, P15, P27, P9, P57, D1, P63, P29, P39, P47, P51, P37, P49, P43, P25, P19, P45a, P55, P33, D7, P61	30
2L	379422	T	G	germline_recurrent	P35, P41, P11, P5, D3, P65, P31, P59, D5, P17, P53, P15, P27, P9, P1, P57, D1, P63, P29, P39, P47, P23, P51, P37, P7, P49, P43, P25, P19, P45a, P55, P33, D7, P61	34
2L	379490	A	C	germline_recurrent	P35, P41, P11, P5, D3, P65, P31, P59, D5, P17, P53, P15, P27, P9, P57, D1, P63, P29, P39, P47, P23, P51, P37, P7, P49, P43, P25, P19, P55, P33, D7, P61	32
2L	379692	A	G	germline_recurrent	P35, P41, P11, D3, P65, P31, P59, D5, P17, P53, P15, P27, P9, P57, D1, P63, P29, P39, P3, P47, P23, P51, P37, P7, P49, P43, P25, P19, P45a, P55, P33, D7, P61	33
2L	379873	T	G	germline_recurrent	P35, P41, P11, D3, P65, P31, P59, D5, P17, P53, P15, P27, P9, P57, D1, P63, P29, P51, P37, P7, P49, P43, P25, P19, P45a, P55, P33, D7	28
2L	379879	G	A	germline_recurrent	P35, P41, P11, D3, P65, P31, P59, D5, P17, P53, P15, P27, P9, P57, D1, P63, P29, P37, P7, P49, P43, P25, P19, P45a, P55, P33, D7	27
2L	380513	C	T	germline_recurrent	P35, P41, P11, P5, D3, P65, P31, P59, P53, P15, P27, P9, P57, D1, P63, P29, P37, P49, P43, P19, P45a, P55, P33, D7, P61	25
2L	380540	T	A	germline_recurrent	P35, P41, P11, P5, D3, P31, P59, P17, P53, P15, P27, P9, P57, D1, P63, P29, P47, P37, P49, P43, P19, P45a, P55, P33, P61	25
2L	380741	C	T	germline_recurrent	P35, P41, P11, P5, D3, P65, P31, P59, P17, P53, P15, P27, P9, P57, D1, P63, P29, P39, P47, P51, P37, P7, P49, P43, P25, P19, P45a, P55, P33, D7, P61	31
2L	381017	T	C	germline_recurrent	P35, P41, P11, P65, P31, P59, P17, P53, P15, P27, P9, P57, P63, P29, P23, P51, P37, P7, P49, P43, P25, P19, P45a, P55, P33, P61	26
2L	381261	C	T	germline_recurrent	P35, P41, P11, P5, D3, P65, P31, P59, D5, P17, P53, P15, P27, P9, P57, D1, P63, P29, P39, P47, P23, P51, P37, P7, P49, P43, P25, P19, P45a, P55, P33, D7, P61	33
2L	381386	G	A	germline_recurrent	P35, P41, P11, P5, D3, P65, P31, P59, D5, P53, P15, P27, P9, P57, D1, P63, P29, P39, P47, P23, P51, P37, P7, P49, P43, P25, P19, P55, P33, D7, P61	31
2L	381787	A	G	germline_recurrent	P35, P41, P11, D3, P65, P31, P59, D5, P53, P15, P27, P9, P57, D1, P63, P29, P39, P47, P23, P51, P37, P7, P49, P43, P25, P19, P45a, P55, P33, D7, P61	31
2L	381846	T	C	germline_recurrent	P35, P41, P11, D3, P65, P31, P59, D5, P17, P53, P15, P27, P9, P57, D1, P63, P29, P39, P47, P23, P51, P37, P49, P43, P25, P19, P45a, P55, P33, D7, P61	31
2L	382173	G	C	germline_recurrent	P35, P41, P11, P5, D3, P65, P31, P59, D5, P53, P15, P27, P9, P57, D1, P63, P29, P39, P47, P23, P51, P37, P7, P49, P43, P25, P19, P45a, P55, P33, D7, P61	32
2L	382411	T	C	germline_recurrent	P35, P41, P11, D3, P65, P31, P59, D5, P53, P15, P27, P9, P57, D1, P63, P29, P39, P47, P23, P51, P37, P7, P49, P43, P25, P19, P45a, P55, P33, D7, P61	31
2L	382724	A	G	germline_recurrent	P35, P41, P11, P5, P65, P31, P59, P17, P53, P15, P27, P9, P57, P63, P29, P39, P3, P47, P23, P51, P37, P49, P43, P25, P19, P45a, P55, P33, P61	29
2L	383261	G	A	germline_recurrent	P35, P41, P11, D3, P65, P31, P59, P17, P53, P15, P27, P9, P57, D1, P63, P29, P39, P23, P51, P37, P7, P49, P43, P25, P19, P45a, P55, P33, P61	29
2L	383384	G	C	germline_recurrent	P35, P41, P11, P5, D3, P65, P31, P59, D5, P17, P53, P15, P27, P9, P57, D1, P63, P29, P39, P47, P23, P51, P37, P7, P49, P43, P25, P19, P45a, P55, P33, D7, P61	33
2L	383450	T	C	germline_recurrent	P35, P41, P11, P5, D3, P65, P31, P59, D5, P17, P53, P15, P27, P9, P57, D1, P63, P29, P3, P47, P23, P51, P37, P49, P43, P25, P19, P45a, P55, P33, D7, P61	32
2L	384022	T	G	germline_recurrent	P35, P41, P11, P5, D3, P65, P31, P59, D5, P53, P15, P27, P9, P57, D1, P63, P29, P39, P47, P23, P51, P37, P7, P49, P43, P25, P19, P55, P33, D7, P61	31
2L	384394	A	T	germline_recurrent	P35, P11, D3, P31, P15, P9, D1, P63, P29, P3, P37, P19, P33	13
2L	385326	G	A	germline_recurrent	P35, P41, P11, D3, P65, P31, P59, P53, P15, P27, P9, P57, D1, P63, P29, P39, P23, P51, P37, P49, P43, P25, P19, P45a, P55, P33	26
2L	385552	A	T	germline_recurrent	P35, P41, P11, D3, P65, P31, P59, D5, P17, P53, P15, P27, P9, P57, D1, P63, P29, P39, P3, P47, P23, P51, P37, P7, P49, P43, P25, P19, P45a, P55, P33, D7, P61	33
2L	385652	T	C	germline_recurrent	P35, P41, P11, P5, D3, P65, P31, P59, P17, P53, P15, P27, P9, P57, D1, P63, P29, P39, P23, P51, P37, P49, P43, P25, P19, P45a, P55, P33	28
2L	386803	A	C	germline_recurrent	P35, P41, P11, D3, P65, P31, P59, D5, P17, P53, P15, P27, P9, P57, D1, P63, P29, P47, P51, P37, P7, P49, P43, P25, P19, P55, P33, D7	28
2L	387006	T	G	germline_recurrent	P35, P41, P11, P5, D3, P65, P31, P59, P53, P15, P27, P9, P57, D1, P63, P29, P51, P37, P49, P43, P25, P19, P45a, P55, P33, P61	26
2L	387471	T	A	germline_recurrent	P35, P41, P11, P5, D3, P31, P59, P53, P15, P9, P1, D1, P63, P29, P3, P47, P51, P37, P7, P49, P43, P19, P45a, P33	24
2L	388850	A	G	germline_recurrent	P35, P41, P11, P5, D3, P31, P59, D5, P17, P53, P15, P27, P9, P1, P57, D1, P63, P29, P3, P47, P23, P51, P37, P43, P25, P19, P33, D7, P61	29
2L	388876	C	T	germline_recurrent	P35, P41, P11, D3, P65, P31, P59, P17, P53, P15, P27, P9, P57, D1, P63, P29, P3, P47, P23, P51, P37, P43, P19, P33, P61	25
2L	389278	G	T	germline_recurrent	P35, P41, P11, P5, D3, P65, P31, P59, P17, P53, P15, P27, P9, P57, D1, P63, P29, P3, P47, P51, P37, P7, P49, P43, P19, P45a, P55, P33, P61	29
2L	389413	T	G	germline_recurrent	P35, P41, P11, D3, P65, P31, P59, P17, P53, P15, P27, P9, P57, D1, P63, P29, P47, P51, P37, P49, P43, P25, P19, P45a, P55, P33, P61	27
2L	389634	G	T	germline_recurrent	P35, P41, P11, D3, P65, P31, P59, P17, P53, P15, P27, P9, P57, D1, P63, P29, P39, P47, P23, P51, P37, P49, P43, P25, P19, P45a, P55, P33, P61	29
2L	389822	T	A	germline_recurrent	P35, P41, P11, D3, P65, P31, P59, P17, P53, P15, P27, P9, P57, D1, P63, P29, P39, P47, P23, P51, P37, P7, P49, P43, P25, P19, P45a, P55, P33, P61	30
2L	390144	G	T	germline_recurrent	P35, P41, P11, D3, P65, P31, P59, D5, P53, P15, P27, P9, P57, D1, P63, P29, P39, P47, P23, P51, P37, P49, P43, P25, P19, P55, P33, D7, P61	29
2L	390815	G	A	germline_recurrent	P35, P41, P11, D3, P65, P31, P59, P17, P53, P15, P27, P9, P1, P57, D1, P63, P29, P39, P47, P23, P51, P37, P7, P49, P43, P25, P19, P45a, P55, P33, P61	31
2L	390919	A	G	germline_recurrent	P35, P41, P11, D3, P65, P31, P59, D5, P53, P15, P27, P9, P57, D1, P63, P29, P47, P23, P37, P49, P43, P25, P19, P45a, P55, P33, D7, P61	28
2L	390995	T	C	germline_recurrent	P35, P41, P11, P5, D3, P65, P31, P59, D5, P53, P15, P27, P9, P57, D1, P63, P29, P23, P51, P37, P49, P43, P25, P19, P45a, P55, P33, D7, P61	29
2L	391036	G	C	germline_recurrent	P35, P41, P11, P5, D3, P65, P31, P59, D5, P53, P15, P27, P9, P57, D1, P63, P29, P23, P51, P37, P49, P43, P19, P45a, P55, P33, D7, P61	28
2L	391397	G	T	germline_recurrent	P35, P41, P11, D3, P65, P31, P53, P15, P27, P9, D1, P63, P29, P37, P49, P43, P19, P33	18
2L	391520	A	C	germline_recurrent	P35, P41, P11, P5, D3, P65, P31, P59, D5, P17, P53, P15, P27, P9, P57, D1, P63, P29, P39, P3, P47, P51, P37, P49, P43, P25, P19, P45a, P55, P33, D7, P61	32
2L	391610	A	C	germline_recurrent	P35, P41, P11, P5, D3, P65, P31, P59, D5, P53, P15, P27, P9, P57, D1, P63, P29, P51, P37, P49, P43, P25, P19, P55, P33, D7, P61	27
2L	392243	T	C	germline_recurrent	P35, P41, P11, P5, P65, P31, P59, P53, P15, P27, P9, P57, P63, P29, P39, P47, P51, P37, P49, P43, P19, P45a, P55, P33	24
2L	392403	A	C	germline_recurrent	P35, P41, P11, D3, P31, P15, P27, P9, P63, P29, P3, P47, P37, P49, P43, P19, P33, D7	18
2L	392479	G	A	germline_recurrent	P35, P41, P11, D3, P31, P59, D5, P17, P53, P15, P27, P9, P57, D1, P63, P29, P47, P23, P51, P37, P7, P49, P43, P19, P55, P33, D7	27
2L	392588	T	C	germline_recurrent	P35, P41, P11, D3, P65, P31, P59, P17, P53, P15, P27, P9, P57, D1, P63, P29, P47, P51, P37, P49, P43, P25, P19, P45a, P55, P33, P61	27
2L	392659	G	C	germline_recurrent	P35, P41, P11, D3, P65, P31, P59, D5, P17, P53, P15, P27, P9, P57, D1, P63, P29, P47, P51, P37, P7, P49, P43, P25, P19, P45a, P55, P33, D7, P61	30
2L	392714	C	T	germline_recurrent	P35, P41, P11, D3, P65, P31, P59, P53, P15, P27, P9, P57, D1, P63, P29, P51, P37, P49, P43, P25, P19, P55, P33, P61	24
2L	393147	A	C	germline_recurrent	P35, P41, P11, P5, P65, P31, P59, D5, P17, P53, P15, P27, P9, P57, P63, P29, P39, P47, P23, P51, P37, P7, P49, P43, P25, P19, P45a, P55, P33, D7	30
2L	393445	G	A	germline_recurrent	P35, P41, P11, D3, P65, P31, P59, P53, P15, P27, P9, P57, D1, P63, P29, P47, P51, P37, P7, P49, P43, P19, P33, D7	24
2L	393983	A	C	germline_recurrent	P35, P41, P11, P5, D3, P65, P31, D5, P53, P15, P27, P9, P57, D1, P63, P29, P39, P51, P37, P7, P49, P43, P25, P19, P55, P33, D7, P61	28
2L	394019	A	G	germline_recurrent	P35, P41, P11, P5, D3, P65, P31, P59, D5, P53, P15, P27, P9, P57, D1, P63, P29, P39, P51, P37, P49, P43, P25, P19, P55, P33, D7	27
2L	394202	T	C	germline_recurrent	P35, P41, P11, P5, D3, P65, P31, P59, P17, P53, P15, P27, P9, D1, P63, P29, P51, P37, P7, P49, P43, P19, P45a, P33, D7	25
2L	395650	T	A	germline_recurrent	P35, P41, P11, P5, D3, P65, P31, P59, D5, P17, P53, P15, P27, P9, P57, D1, P63, P29, P47, P23, P51, P37, P49, P43, P25, P19, P45a, P55, P33, D7, P61	31
2L	395753	T	G	germline_recurrent	P35, P41, P11, P5, D3, P65, P31, P59, D5, P17, P53, P15, P27, P9, P57, D1, P63, P29, P39, P3, P47, P23, P51, P37, P7, P49, P43, P25, P19, P45a, P55, P33, D7, P61	34
2L	395765	C	G	germline_recurrent	P35, P41, P11, P5, D3, P65, P31, P59, D5, P17, P53, P15, P27, P9, P57, D1, P63, P29, P39, P3, P47, P23, P51, P37, P7, P49, P43, P25, P19, P55, P33, D7, P61	33
2L	395803	G	T	germline_recurrent	P35, P41, P11, P5, D3, P65, P31, P59, D5, P17, P53, P15, P27, P9, P57, D1, P63, P29, P39, P3, P23, P51, P37, P49, P43, P25, P19, P45a, P55, P33, D7, P61	32
2L	395914	A	G	germline_recurrent	P35, P41, P11, D3, P65, P31, P59, D5, P17, P53, P15, P27, P9, P57, D1, P63, P29, P39, P47, P51, P37, P7, P49, P43, P25, P19, P55, P33, D7, P61	30
2L	396351	T	G	germline_recurrent	P35, P41, P11, D3, P65, P31, P59, D5, P17, P53, P15, P27, P9, P57, D1, P63, P29, P39, P47, P23, P51, P37, P7, P49, P43, P25, P19, P45a, P55, P33, D7, P61	32
2L	396526	C	T	germline_recurrent	P35, P41, P11, P5, D3, P65, P31, P59, D5, P17, P53, P15, P27, P9, P57, D1, P63, P29, P39, P47, P23, P51, P37, P7, P49, P43, P25, P19, P45a, P55, P33, D7, P61	33
2L	396732	A	T	germline_recurrent	P35, P41, P11, P5, D3, P65, P31, P59, D5, P17, P53, P15, P27, P9, P57, D1, P63, P29, P39, P3, P47, P23, P51, P37, P7, P49, P43, P25, P19, P45a, P55, P33, D7, P61	34
2L	397016	A	G	germline_recurrent	P35, P41, P11, D3, P65, P31, P59, D5, P17, P53, P15, P27, P9, P57, D1, P63, P29, P39, P3, P47, P23, P51, P37, P7, P49, P43, P25, P19, P45a, P55, P33, D7, P61	33
2L	397095	A	C	germline_recurrent	P35, P41, P11, P5, D3, P65, P31, P59, D5, P17, P53, P15, P27, P9, P57, D1, P63, P29, P39, P3, P47, P23, P51, P37, P7, P49, P43, P25, P19, P45a, P55, P33, D7, P61	34
2L	397136	T	A	germline_recurrent	P35, P41, P11, P5, D3, P65, P31, P59, D5, P17, P53, P15, P27, P9, P57, D1, P63, P29, P39, P47, P23, P51, P37, P7, P49, P43, P25, P19, P45a, P55, P33, D7, P61	33
2L	397179	A	C	germline_recurrent	P35, P41, P11, P5, D3, P65, P31, P59, D5, P17, P53, P15, P27, P9, P57, D1, P63, P29, P39, P47, P23, P51, P37, P7, P49, P43, P25, P19, P45a, P55, P33, D7, P61	33
2L	397245	G	A	germline_recurrent	P35, P41, P11, D3, P65, P31, P59, D5, P17, P53, P15, P27, P9, P57, D1, P63, P29, P39, P47, P23, P51, P37, P49, P43, P25, P19, P45a, P55, P33, D7, P61	31
2L	397261	A	G	germline_recurrent	P35, P41, P11, D3, P65, P31, P59, D5, P17, P53, P15, P27, P9, P57, D1, P63, P29, P39, P47, P23, P51, P37, P49, P43, P25, P19, P45a, P55, P33, D7, P61	31
2L	397474	T	C	germline_recurrent	P35, P41, P11, D3, P65, P31, P59, D5, P53, P15, P27, P9, P57, D1, P63, P29, P39, P47, P23, P51, P37, P7, P49, P43, P25, P19, P45a, P55, P33, D7, P61	31
2L	397541	A	T	germline_recurrent	P35, P41, P11, D3, P65, P31, P59, D5, P53, P15, P27, P9, P57, D1, P63, P29, P39, P47, P23, P51, P37, P7, P49, P43, P25, P19, P45a, P55, P33, D7, P61	31
2L	397579	G	T	germline_recurrent	P35, P41, P11, P5, D3, P65, P31, D5, P17, P53, P15, P27, P9, P57, D1, P63, P29, P39, P47, P23, P51, P37, P7, P49, P43, P25, P19, P45a, P55, P33, D7, P61	32
2L	398075	A	G	germline_recurrent	P35, P41, P11, D3, P65, P31, P59, D5, P17, P53, P15, P27, P9, P57, D1, P63, P29, P39, P47, P23, P51, P37, P7, P49, P43, P25, P19, P45a, P55, P33, D7, P61	32
2L	398438	C	T	germline_recurrent	P35, P41, P11, D3, P65, P31, P59, D5, P17, P53, P15, P27, P9, P57, D1, P63, P29, P39, P23, P51, P37, P49, P43, P25, P19, P45a, P55, P33, D7, P61	30
2L	398594	T	G	germline_recurrent	P35, P41, P11, P5, D3, P65, P31, P59, D5, P53, P15, P27, P9, P57, D1, P63, P29, P39, P47, P23, P51, P37, P49, P43, P25, P19, P45a, P55, P33, D7, P61	31
2L	398834	C	T	germline_recurrent	P35, P41, P11, P5, D3, P65, P31, P59, D5, P17, P53, P15, P27, P9, P57, D1, P63, P29, P39, P47, P23, P51, P37, P7, P49, P43, P25, P19, P45a, P55, P33, D7, P61	33
2L	398896	A	G	germline_recurrent	P35, P41, P11, D3, P65, P31, P59, P17, P53, P15, P27, P9, P57, D1, P63, P29, P39, P47, P23, P51, P37, P7, P49, P43, P25, P19, P45a, P55, P33, P61	30
2L	399007	A	C	germline_recurrent	P35, P41, P11, D3, P65, P31, P59, P17, P53, P15, P27, P9, P57, D1, P63, P29, P39, P23, P51, P37, P49, P43, P25, P19, P45a, P55, P33, P61	28
2L	399069	C	T	germline_recurrent	P35, P41, P11, D3, P65, P31, P59, P17, P53, P15, P27, P9, P57, D1, P63, P29, P39, P3, P47, P23, P51, P37, P49, P43, P19, P45a, P55, P33, P61	29
2L	399200	C	T	germline_recurrent	P35, P41, P11, P5, D3, P65, P31, P59, P17, P53, P15, P27, P9, P57, D1, P63, P29, P39, P47, P23, P51, P37, P7, P49, P43, P25, P19, P45a, P55, P33, P61	31
2L	399556	G	A	germline_recurrent	P35, P41, P11, D3, P65, P31, P59, D5, P53, P15, P27, P9, P57, D1, P63, P29, P39, P47, P23, P51, P37, P7, P49, P43, P25, P19, P45a, P55, P33, D7, P61	31
2L	400352	G	C	germline_recurrent	P35, P41, P11, P65, P31, P59, P17, P53, P15, P27, P9, P57, P63, P29, P39, P47, P23, P51, P37, P7, P49, P43, P25, P19, P55, P33, P61	27
2L	401028	C	G	germline_recurrent	P35, P41, P11, D3, P65, P31, P59, P17, P53, P15, P27, P9, P57, D1, P63, P29, P39, P47, P51, P37, P7, P49, P43, P25, P19, P45a, P55, P33, P61	29
2L	402147	C	T	germline_recurrent	P35, P41, P11, D3, P65, P31, P59, P17, P53, P15, P27, P9, P57, D1, P63, P29, P39, P3, P47, P51, P37, P7, P49, P43, P25, P19, P45a, P55, P33, P61	30
2L	402178	A	G	germline_recurrent	P35, P41, P11, P5, D3, P65, P31, P59, D5, P17, P53, P15, P27, P9, P57, D1, P63, P29, P39, P3, P47, P23, P51, P37, P7, P49, P43, P25, P19, P45a, P55, P33, D7, P61	34
2L	402435	G	C	germline_recurrent	P35, P41, P11, D3, P65, P31, P59, P17, P53, P15, P27, P9, P57, D1, P63, P29, P39, P3, P47, P23, P51, P37, P7, P49, P43, P25, P19, P45a, P55, P33, P61	31
2L	402443	C	A	germline_recurrent	P35, P41, P11, P65, P31, P59, P17, P53, P15, P27, P9, P57, P63, P29, P39, P3, P47, P23, P51, P37, P7, P49, P43, P25, P19, P45a, P55, P33, P61	29
2L	402480	G	C	germline_recurrent	P35, P41, P11, D3, P65, P31, P59, P17, P53, P15, P27, P9, P57, D1, P63, P29, P23, P51, P37, P7, P49, P43, P25, P19, P45a, P55, P33, P61	28
2L	402662	A	G	germline_recurrent	P35, P41, P11, D3, P65, P31, P59, P17, P53, P15, P27, P9, P57, D1, P63, P29, P39, P47, P51, P37, P7, P49, P43, P25, P19, P45a, P55, P33, P61	29
2L	402773	A	T	germline_recurrent	P35, P41, P11, D3, P65, P31, P59, P17, P53, P15, P27, P9, P57, D1, P63, P29, P39, P3, P47, P23, P51, P37, P7, P49, P43, P25, P19, P45a, P55, P33, P61	31
2L	403157	C	T	germline_recurrent	P35, P41, P11, D3, P65, P31, P59, P53, P15, P27, P9, P57, D1, P63, P29, P39, P23, P51, P37, P7, P49, P43, P25, P19, P45a, P55, P33, P61	28
2L	403511	C	T	germline_recurrent	P35, P41, P11, P65, P31, P59, P17, P53, P15, P27, P9, P57, P63, P29, P3, P47, P23, P51, P37, P7, P49, P43, P25, P19, P45a, P55, P33, P61	28
2L	403540	A	G	germline_recurrent	P35, P41, P11, P65, P31, P59, P17, P53, P15, P27, P9, P57, P63, P29, P3, P47, P23, P51, P37, P7, P49, P43, P25, P19, P45a, P55, P33, P61	28
2L	403606	A	T	germline_recurrent	P35, P41, P11, P65, P31, P59, P17, P53, P15, P27, P9, P57, P63, P29, P39, P47, P23, P51, P37, P49, P43, P25, P19, P45a, P55, P33, P61	27
2L	403612	A	G	germline_recurrent	P35, P41, P11, P65, P31, P59, P17, P53, P15, P27, P9, P57, P63, P29, P39, P47, P23, P51, P37, P49, P43, P25, P19, P45a, P55, P33, P61	27
2L	403667	C	G	germline_recurrent	P35, P41, P11, P65, P31, P59, P17, P53, P15, P27, P9, P1, P57, P63, P29, P39, P3, P47, P23, P51, P37, P49, P43, P25, P19, P45a, P55, P33, P61	29
2L	403708	T	A	germline_recurrent	P35, P41, P11, P65, P31, P59, P17, P53, P15, P27, P9, P1, P57, P63, P29, P3, P47, P23, P51, P37, P7, P49, P43, P25, P19, P45a, P55, P33, P61	29
2L	403716	G	C	germline_recurrent	P35, P41, P11, P65, P31, P59, P17, P53, P15, P27, P9, P1, P57, P63, P29, P3, P47, P23, P51, P37, P7, P49, P43, P25, P19, P45a, P55, P33, P61	29
2L	403859	G	T	germline_recurrent	P35, P41, P11, P65, P31, P59, P17, P53, P15, P27, P9, P57, P63, P29, P47, P23, P51, P37, P49, P43, P25, P19, P45a, P55, P33, P61	26
2L	404344	A	T	germline_recurrent	P35, P41, P11, P65, P31, P59, P17, P53, P15, P27, P9, P57, P63, P29, P47, P23, P51, P37, P7, P49, P43, P25, P19, P55, P33, P61	26
2L	404505	T	G	germline_recurrent	P35, P41, P11, P65, P31, P59, P17, P53, P15, P27, P9, P57, P63, P29, P39, P47, P23, P51, P37, P49, P43, P25, P19, P45a, P55, P33, P61	27
2L	404676	A	C	germline_recurrent	P35, P41, P11, P65, P31, P59, P17, P53, P15, P27, P9, P57, P63, P29, P39, P47, P23, P51, P37, P7, P49, P43, P25, P19, P45a, P55, P33, P61	28
2L	404793	A	G	germline_recurrent	P35, P41, P11, P65, P31, P59, P17, P53, P15, P27, P9, P57, P63, P29, P39, P47, P23, P51, P37, P7, P49, P43, P25, P19, P45a, P55, P33, P61	28
2L	405501	G	A	germline_recurrent	P35, P41, P11, P65, P31, P59, P17, P53, P15, P27, P9, P57, P63, P29, P39, P47, P23, P51, P37, P7, P49, P43, P25, P19, P45a, P55, P33, P61	28
2L	405659	C	G	germline_recurrent	P35, P41, P11, P65, P31, P59, P17, P53, P15, P27, P9, P57, P63, P29, P47, P23, P51, P37, P7, P49, P43, P25, P19, P45a, P55, P33, P61	27
2L	405939	T	C	germline_recurrent	P35, P41, P11, D3, P65, P31, P59, D5, P53, P15, P27, P9, P57, D1, P63, P29, P47, P23, P51, P37, P7, P49, P43, P25, P19, P45a, P55, P33, D7, P61	30
2L	406604	T	C	germline_recurrent	P35, P41, P11, D3, P65, P31, P59, P17, P53, P15, P27, P9, P57, D1, P63, P29, P39, P47, P23, P51, P37, P7, P49, P43, P25, P19, P45a, P55, P33, P61	30
2L	406826	A	G	germline_recurrent	P35, P41, P11, D3, P65, P31, P59, P17, P53, P15, P27, P9, P57, D1, P63, P29, P39, P47, P23, P51, P37, P7, P49, P43, P25, P19, P45a, P55, P33, P61	30
2L	408238	G	A	germline_recurrent	P35, P41, P11, P5, D3, P65, P31, P59, D5, P17, P53, P15, P27, P9, P57, D1, P63, P29, P3, P47, P23, P51, P37, P7, P49, P43, P25, P19, P45a, P55, P33, D7, P61	33
2L	408424	C	A	germline_recurrent	P35, P41, P11, P5, D3, P65, P31, D5, P17, P15, P27, P9, D1, P63, P29, P47, P51, P37, P49, P43, P25, P19, P33, D7	24
2L	408551	T	A	germline_recurrent	P35, P41, P11, P5, D3, P65, P31, P15, P9, D1, P63, P29, P47, P51, P37, P43, P19, P33, D7	19
2L	408731	C	T	germline_recurrent	P35, P41, P11, P5, D3, P65, P31, P59, P17, P15, P9, P57, D1, P63, P29, P47, P51, P37, P7, P49, P43, P19, P33, D7, P61	25
2L	408738	T	C	germline_recurrent	P35, P41, P11, P5, D3, P65, P31, P59, P17, P15, P9, P57, D1, P63, P29, P47, P51, P37, P7, P49, P43, P19, P33, D7, P61	25
2L	408889	T	C	germline_recurrent	P35, P41, P11, P5, D3, P65, P31, P59, P17, P15, P9, D1, P63, P29, P3, P47, P37, P7, P49, P43, P19, P45a, P33, D7, P61	25
2L	409074	T	C	germline_recurrent	P35, P41, P11, P5, D3, P65, P31, P59, D5, P53, P15, P27, P9, P57, D1, P63, P29, P3, P47, P51, P37, P7, P49, P43, P19, P45a, P33, D7, P61	29
2L	409109	G	T	germline_recurrent	P35, P41, P11, P5, D3, P65, P31, P59, D5, P53, P15, P27, P9, P57, D1, P63, P29, P3, P47, P51, P37, P7, P49, P43, P25, P19, P45a, P55, P33, D7, P61	31
2L	409132	T	A	germline_recurrent	P35, P41, P11, P5, D3, P65, P31, P59, D5, P53, P15, P27, P9, P57, D1, P63, P29, P3, P47, P51, P37, P7, P49, P43, P25, P19, P45a, P55, P33, D7, P61	31
2L	409223	G	A	germline_recurrent	P35, P41, P11, P5, D3, P65, P31, P59, P53, P15, P27, P9, P57, D1, P63, P29, P39, P3, P47, P23, P51, P37, P7, P49, P43, P25, P19, P45a, P55, P33, D7, P61	32
2L	409409	A	G	germline_recurrent	P35, P41, P11, P5, D3, P65, P31, P59, D5, P17, P53, P15, P27, P9, P57, D1, P63, P29, P39, P3, P47, P23, P51, P37, P7, P49, P43, P25, P19, P45a, P55, P33, D7, P61	34
2L	409745	G	A	germline_recurrent	P35, P41, P11, P5, D3, P65, P31, P59, D5, P53, P15, P27, P9, P57, D1, P63, P29, P47, P23, P51, P37, P7, P49, P43, P19, P45a, P55, P33, D7, P61	30
2L	409965	A	G	germline_recurrent	P35, P41, P11, D3, P65, P31, P59, D5, P17, P53, P15, P27, P9, P57, D1, P63, P29, P39, P47, P23, P51, P37, P7, P49, P43, P25, P19, P45a, P55, P33, D7, P61	32
2L	410655	C	T	germline_recurrent	P35, P41, P11, P5, D3, P65, P31, P59, D5, P53, P15, P27, P9, P57, D1, P63, P29, P39, P47, P23, P51, P37, P49, P43, P25, P19, P45a, P55, P33, D7, P61	31
2L	411092	A	C	germline_recurrent	P35, P41, P11, D3, P65, P31, P59, D5, P53, P15, P27, P9, P1, P57, D1, P63, P29, P39, P47, P23, P51, P37, P7, P49, P43, P25, P19, P45a, P55, P33, D7, P61	32
2L	411188	A	G	germline_recurrent	P35, P41, P11, P5, D3, P65, P31, P59, D5, P17, P53, P15, P27, P9, P57, D1, P63, P29, P39, P47, P23, P51, P37, P49, P43, P25, P19, P45a, P55, P33, D7, P61	32
2L	411269	A	G	germline_recurrent	P35, P41, P11, P65, P31, P59, P53, P15, P27, P9, P57, P63, P29, P39, P23, P51, P37, P49, P43, P25, P19, P45a, P55, P33, P61	25
2L	411374	C	T	germline_recurrent	P35, P41, P11, P65, P31, P59, P53, P15, P27, P9, P57, P63, P29, P39, P47, P23, P51, P37, P49, P43, P25, P19, P45a, P55, P33, P61	26
2L	411994	G	A	germline_recurrent	P35, P41, P11, P65, P31, P59, P17, P53, P15, P27, P9, P57, P63, P29, P23, P51, P37, P7, P49, P43, P25, P19, P55, P33, P61	25
2L	412172	A	G	germline_recurrent	P35, P41, P11, P5, P65, P31, P59, P17, P53, P15, P27, P9, P57, P63, P29, P39, P47, P23, P51, P37, P7, P49, P43, P19, P45a, P55, P33, P61	28
2L	412241	A	T	germline_recurrent	P35, P41, P11, P5, D3, P65, P31, P59, D5, P53, P15, P27, P9, P57, D1, P63, P29, P47, P51, P37, P43, P19, P33, D7	24
2L	412327	G	A	germline_recurrent	P35, P41, P11, P5, D3, P65, P31, P59, D5, P15, P9, D1, P63, P29, P3, P47, P37, P43, P19, P33, D7	21
2L	413527	G	T	germline_recurrent	P35, P41, P11, P5, D3, P65, P31, P59, D5, P17, P53, P15, P27, P9, P57, D1, P63, P29, P39, P47, P23, P51, P37, P7, P49, P43, P25, P19, P45a, P55, P33, D7, P61	33
2L	413610	C	A	germline_recurrent	P35, P41, P11, P5, D3, P65, P31, P59, D5, P17, P53, P15, P27, P9, P57, D1, P63, P29, P39, P3, P47, P23, P51, P37, P49, P43, P25, P19, P45a, P55, P33, D7, P61	33
2L	413638	C	T	germline_recurrent	P35, P41, P11, P5, D3, P65, P31, P59, D5, P17, P53, P15, P27, P9, P57, D1, P63, P29, P39, P3, P47, P23, P51, P37, P7, P49, P43, P25, P19, P45a, P55, P33, D7, P61	34
2L	413906	C	T	germline_recurrent	P35, P41, P11, P5, D3, P65, P31, P59, D5, P17, P53, P15, P27, P9, P57, D1, P63, P29, P3, P47, P51, P37, P7, P49, P43, P19, P45a, P55, P33, D7, P61	31
2L	413942	A	G	germline_recurrent	P35, P41, P11, P65, P31, P59, P17, P53, P15, P27, P9, P57, P63, P29, P3, P47, P51, P37, P7, P49, P43, P19, P55, P33, P61	25
2L	414058	T	G	germline_recurrent	P35, P41, P11, P5, D3, P31, P59, D5, P17, P15, P27, P9, P57, D1, P63, P29, P47, P23, P37, P7, P49, P43, P25, P19, P33, D7	26
2L	414294	C	T	germline_recurrent	P35, P41, P11, P5, D3, P65, P31, P59, D5, P17, P53, P15, P27, P9, P57, D1, P63, P29, P39, P47, P23, P51, P37, P49, P43, P25, P19, P55, P33, D7, P61	31
2L	414906	C	G	germline_recurrent	P35, P41, P11, D3, P31, P59, D5, P53, P15, P27, P9, P57, D1, P63, P29, P37, P49, P43, P25, P19, P55, P33, D7	23
2L	415146	G	A	germline_recurrent	P35, P41, P11, P65, P31, P59, P53, P15, P27, P9, P57, P63, P29, P47, P23, P51, P37, P7, P49, P43, P25, P19, P55, P33, P61	25
2L	415250	A	T	germline_recurrent	P35, P41, P11, D3, P65, P31, P59, D5, P17, P53, P15, P27, P9, P57, D1, P63, P29, P39, P23, P51, P37, P49, P43, P25, P19, P45a, P55, P33, D7, P61	30
2L	415294	C	T	germline_recurrent	P35, P41, P11, P65, P31, P59, P17, P53, P15, P27, P9, P57, P63, P29, P3, P47, P23, P51, P37, P49, P43, P25, P19, P45a, P55, P33, P61	27
2L	415352	C	A	germline_recurrent	P35, P41, P11, P5, D3, P65, P31, P59, D5, P17, P53, P15, P27, P9, P57, D1, P63, P29, P23, P37, P49, P43, P25, P19, P55, P33, D7, P61	28
2L	415996	G	A	germline_recurrent	P35, P41, P11, P65, P31, P59, P17, P53, P15, P27, P9, P57, P63, P29, P39, P23, P51, P37, P7, P49, P43, P25, P19, P45a, P55, P33, P61	27
2L	416140	T	C	germline_recurrent	P35, P41, P11, D3, P65, P31, P59, D5, P53, P15, P27, P9, P57, D1, P63, P29, P39, P23, P51, P37, P7, P49, P43, P25, P19, P55, P33, D7, P61	29
2L	417295	G	C	germline_recurrent	P35, P41, P11, D3, P65, P31, P59, D5, P17, P53, P15, P27, P9, P57, D1, P63, P29, P39, P47, P23, P51, P37, P7, P49, P43, P25, P19, P45a, P55, P33, D7, P61	32
2L	418012	A	G	germline_recurrent	P35, P41, P11, P5, D3, P65, P31, P59, D5, P53, P15, P27, P9, P57, D1, P63, P29, P39, P47, P23, P37, P49, P43, P25, P19, P45a, P55, P33, D7, P61	30
2L	418046	G	C	germline_recurrent	P35, P41, P11, P5, D3, P65, P31, P59, D5, P17, P53, P15, P27, P9, P57, D1, P63, P29, P39, P47, P23, P51, P37, P49, P43, P25, P19, P45a, P55, P33, D7, P61	32
2L	418854	G	A	germline_recurrent	P35, P41, P11, P5, D3, P65, P31, P59, D5, P17, P53, P15, P27, P9, P57, D1, P63, P29, P39, P47, P23, P51, P37, P7, P49, P43, P25, P19, P45a, P55, P33, D7, P61	33
2L	418911	A	G	germline_recurrent	P35, P41, P11, P5, D3, P65, P31, P59, D5, P17, P53, P15, P27, P9, P57, D1, P63, P29, P3, P47, P23, P51, P37, P7, P49, P43, P25, P19, P45a, P55, P33, D7, P61	33
2L	419205	G	A	germline_recurrent	P35, P41, P11, D3, P65, P31, P59, D5, P17, P53, P15, P27, P9, P57, D1, P63, P29, P47, P23, P51, P37, P7, P49, P43, P25, P19, P55, P33, D7, P61	30
2L	419254	C	T	germline_recurrent	P35, P41, P11, D3, P65, P31, P59, D5, P17, P53, P15, P27, P9, P57, D1, P63, P29, P39, P47, P23, P51, P37, P7, P49, P43, P25, P19, P45a, P55, P33, D7, P61	32
2L	419394	C	T	germline_recurrent	P35, P41, P11, P65, P31, P59, P17, P53, P15, P27, P9, P57, P63, P29, P47, P23, P51, P37, P7, P49, P43, P25, P19, P45a, P55, P33, P61	27
2L	419582	C	A	germline_recurrent	P35, P41, P11, P5, D3, P65, P31, P59, D5, P17, P53, P15, P27, P9, P57, D1, P63, P29, P3, P47, P51, P37, P49, P43, P19, P45a, P55, P33, D7, P61	30
2L	419636	C	G	germline_recurrent	P35, P41, P11, P5, D3, P65, P31, P59, D5, P17, P53, P15, P27, P9, P57, D1, P63, P29, P47, P51, P37, P49, P43, P19, P45a, P55, P33, D7, P61	29
2L	419719	T	G	germline_recurrent	P35, P41, P11, P5, D3, P65, P31, P59, P17, P53, P15, P9, P57, D1, P63, P29, P39, P3, P47, P51, P37, P49, P43, P19, P45a, P33, D7, P61	28
2L	419755	A	G	germline_recurrent	P35, P41, P11, P5, D3, P65, P31, P53, P15, P9, P57, D1, P63, P29, P3, P47, P51, P37, P49, P43, P19, P45a, P55, P33, D7	25
2L	419788	G	C	germline_recurrent	P35, P41, P11, P5, D3, P65, P31, P59, D5, P53, P15, P9, P57, D1, P63, P29, P3, P47, P51, P37, P49, P43, P19, P45a, P55, P33, D7, P61	28
2L	419919	C	T	germline_recurrent	P35, P41, P11, D3, P65, P31, P59, D5, P53, P15, P27, P9, P57, D1, P63, P29, P47, P37, P7, P49, P43, P25, P19, P45a, P55, P33, D7, P61	28
2L	420029	A	C	germline_recurrent	P35, P41, P11, P65, P31, P59, P17, P53, P15, P27, P9, P57, P63, P29, P39, P47, P23, P51, P37, P49, P43, P25, P19, P45a, P55, P33, P61	27
2L	420177	A	C	germline_recurrent	P35, P41, P11, D3, P65, P31, P59, D5, P17, P53, P15, P27, P9, P57, D1, P63, P29, P3, P47, P23, P51, P37, P7, P49, P43, P25, P19, P45a, P55, P33, D7, P61	32
2L	420569	G	A	germline_recurrent	P35, P41, P11, D3, P65, P31, P59, D5, P53, P15, P27, P9, P57, D1, P63, P29, P39, P47, P23, P51, P37, P7, P49, P43, P25, P19, P45a, P55, P33, D7, P61	31
2L	420731	G	A	germline_recurrent	P35, P41, P11, P5, D3, P65, P31, P59, D5, P17, P53, P15, P27, P9, P57, D1, P63, P29, P39, P3, P47, P23, P51, P37, P7, P49, P43, P25, P19, P45a, P55, P33, D7, P61	34
2L	420794	T	C	germline_recurrent	P35, P41, P11, D3, P65, P31, P59, D5, P17, P53, P15, P27, P9, P57, D1, P63, P29, P39, P3, P47, P23, P51, P37, P7, P49, P43, P25, P19, P45a, P55, P33, D7, P61	33
2L	421361	G	A	germline_recurrent	P35, P41, P11, P5, P65, P31, P59, P53, P15, P27, P9, P57, P63, P29, P47, P23, P37, P49, P43, P25, P19, P45a, P55, P33, P61	25
2L	421794	G	T	germline_recurrent	P35, P41, P11, P5, P65, P31, P53, P15, P27, P9, P57, P63, P29, P37, P49, P43, P19, P45a, P55, P33, P61	21
2L	421883	T	C	germline_recurrent	P35, P41, P11, D3, P65, P31, D5, P17, P53, P15, P27, P9, P57, D1, P63, P29, P47, P37, P7, P49, P43, P25, P19, P45a, P55, P33, D7, P61	28
2L	421960	A	G	germline_recurrent	P35, P41, P11, D3, P65, P31, P59, D5, P17, P53, P15, P27, P9, P57, D1, P63, P29, P23, P37, P49, P43, P25, P19, P45a, P55, P33, D7, P61	28
2L	422345	A	G	germline_recurrent	P35, P41, P11, P65, P31, P59, P17, P53, P15, P27, P9, P57, P63, P29, P39, P47, P23, P51, P37, P7, P49, P43, P25, P19, P45a, P55, P33, P61	28
2L	422372	G	A	germline_recurrent	P35, P41, P11, P5, P65, P31, P59, P17, P53, P15, P27, P9, P57, P63, P29, P39, P3, P47, P23, P51, P37, P7, P49, P43, P25, P19, P45a, P55, P33, P61	30
2L	422457	T	A	germline_recurrent	P35, P41, P11, D3, P65, P31, P59, D5, P17, P53, P15, P27, P9, P57, D1, P63, P29, P39, P47, P51, P37, P49, P43, P19, P45a, P55, P33, D7, P61	29
2L	422475	A	T	germline_recurrent	P35, P41, P11, D3, P65, P31, P59, D5, P17, P53, P15, P27, P9, P57, D1, P63, P29, P39, P51, P37, P49, P43, P19, P45a, P55, P33, D7, P61	28
2L	423051	A	T	germline_recurrent	P35, P41, P11, P5, D3, P65, P31, P59, D5, P17, P53, P15, P27, P9, P57, D1, P63, P29, P47, P23, P51, P37, P49, P43, P25, P19, P45a, P55, P33, D7, P61	31
2L	423177	T	C	germline_recurrent	P35, P41, P11, P5, D3, P65, P31, P59, D5, P17, P53, P15, P27, P9, P57, D1, P63, P29, P39, P47, P23, P51, P37, P49, P43, P25, P19, P45a, P55, P33, D7, P61	32
2L	423194	A	T	germline_recurrent	P35, P41, P11, P5, D3, P65, P31, P59, D5, P17, P53, P15, P27, P9, P57, D1, P63, P29, P39, P47, P23, P51, P37, P49, P43, P19, P45a, P55, P33, D7, P61	31
2L	423311	A	G	germline_recurrent	P35, P41, P11, P31, P53, P15, P9, P63, P37, P49, P43, P19	12
2L	423835	A	C	germline_recurrent	P35, P41, P11, D3, P65, P31, P59, D5, P17, P53, P15, P27, P9, P57, D1, P63, P29, P39, P23, P37, P49, P43, P25, P19, P45a, P55, P33, D7, P61	29
2L	423935	C	T	germline_recurrent	P35, P41, P11, D3, P65, P31, P59, D5, P17, P53, P15, P27, P9, P57, D1, P63, P29, P39, P23, P51, P37, P49, P43, P25, P19, P45a, P55, P33, D7, P61	30
2L	424082	G	T	germline_recurrent	P35, P41, P11, D3, P65, P31, P59, D5, P17, P53, P15, P27, P9, P57, D1, P63, P29, P23, P51, P37, P49, P43, P25, P19, P45a, P55, P33, D7, P61	29
2L	424139	A	G	germline_recurrent	P35, P41, P11, D3, P65, P31, P59, D5, P17, P53, P15, P27, P9, P57, D1, P63, P29, P47, P23, P51, P37, P49, P43, P25, P19, P55, P33, D7	28
2L	424145	T	A	germline_recurrent	P35, P41, P11, D3, P65, P31, P59, D5, P17, P53, P15, P27, P9, P57, D1, P63, P29, P47, P23, P51, P37, P49, P43, P25, P19, P55, P33, D7	28
2L	424235	C	T	germline_recurrent	P35, P41, P11, D3, P65, P31, P59, D5, P17, P53, P15, P27, P9, P57, D1, P63, P29, P47, P23, P51, P37, P49, P43, P25, P19, P45a, P55, P33, D7	29
2L	424262	A	G	germline_recurrent	P35, P41, P11, D3, P65, P31, P59, D5, P53, P15, P27, P9, P57, D1, P63, P29, P47, P23, P51, P37, P7, P49, P43, P25, P19, P55, P33, D7	28
2L	424295	T	C	germline_recurrent	P35, P41, P11, D3, P65, P31, P59, D5, P53, P15, P27, P9, P57, D1, P63, P29, P39, P47, P23, P51, P37, P7, P49, P43, P25, P19, P55, P33, D7, P61	30
2L	424367	G	A	germline_recurrent	P35, P41, P11, P65, P31, P59, P17, P53, P15, P27, P9, P57, P63, P29, P39, P47, P23, P51, P37, P7, P49, P43, P25, P19, P45a, P55, P33, P61	28
2L	424394	C	T	germline_recurrent	P35, P41, P11, D3, P65, P31, P59, D5, P17, P53, P15, P27, P9, P57, D1, P63, P29, P39, P47, P23, P51, P37, P49, P43, P25, P19, P45a, P55, P33, D7, P61	31
2L	424514	T	A	germline_recurrent	P35, P41, P11, D3, P65, P31, P59, D5, P53, P15, P27, P9, P57, D1, P63, P29, P39, P47, P23, P51, P37, P49, P43, P25, P19, P45a, P55, P33, D7, P61	30
2L	424520	C	G	germline_recurrent	P35, P41, P11, D3, P65, P31, P59, D5, P17, P53, P15, P27, P9, P57, D1, P63, P29, P39, P47, P23, P37, P7, P49, P43, P25, P19, P45a, P55, P33, D7, P61	31
2L	424681	C	T	germline_recurrent	P35, P41, P11, D3, P65, P31, P59, D5, P53, P15, P27, P9, P57, D1, P63, P29, P39, P23, P51, P37, P49, P43, P25, P19, P45a, P55, P33, D7, P61	29
2L	424778	C	G	germline_recurrent	P35, P41, P11, D3, P65, P31, P59, D5, P17, P53, P15, P27, P9, P1, P57, D1, P63, P29, P39, P47, P23, P51, P37, P49, P43, P25, P19, P45a, P55, P33, D7, P61	32
2L	425105	T	C	germline_recurrent	P35, P41, P11, P5, D3, P65, P31, P59, D5, P17, P53, P15, P27, P9, P57, D1, P63, P29, P39, P47, P23, P51, P37, P49, P43, P25, P19, P45a, P55, P33, D7, P61	32
2L	425424	A	T	germline_recurrent	P35, P41, P11, P65, P31, P59, P17, P53, P15, P27, P9, P1, P57, P63, P29, P39, P51, P37, P49, P43, P19, P45a, P55, P33	24
2L	425439	T	A	germline_recurrent	P35, P41, P11, P65, P31, P59, P53, P15, P27, P9, P57, P63, P29, P3, P51, P37, P49, P43, P19, P45a, P55, P33, P61	23
2L	425447	T	C	germline_recurrent	P35, P41, P11, P65, P31, P59, P53, P15, P27, P9, P57, P63, P29, P39, P51, P37, P49, P43, P19, P45a, P55, P33, P61	23
2L	425849	C	T	germline_recurrent	P35, P41, P11, P5, D3, P65, P31, P59, D5, P17, P53, P15, P27, P9, P57, D1, P63, P29, P47, P23, P51, P37, P49, P43, P19, P45a, P55, P33, D7, P61	30
2L	425876	G	A	germline_recurrent	P35, P41, P11, P5, D3, P65, P31, P59, D5, P53, P15, P27, P9, P57, D1, P63, P29, P23, P51, P37, P49, P43, P25, P19, P45a, P55, P33, D7, P61	29
2L	426684	G	A	germline_recurrent	P35, P41, D3, P31, D5, P53, P15, P27, D1, P63, P49, P43, P19, P33, D7	15
2L	426734	G	A	germline_recurrent	P35, P41, P11, D3, D5, P53, P15, P9, P57, D1, P63, P29, P37, P49, P43, P19, P33, D7	18
2L	426747	T	C	germline_recurrent	P35, P41, P11, D3, P65, P31, D5, P53, P15, P27, P9, P57, D1, P63, P29, P37, P49, P43, P19, P33, D7	21
2L	426832	C	A	germline_recurrent	P35, P41, P11, D3, P65, P31, P59, D5, P17, P53, P15, P27, P9, P57, D1, P63, P29, P51, P37, P7, P49, P43, P19, P55, P33, D7	26
2L	426871	A	C	germline_recurrent	P35, P41, D3, P31, P17, P15, D1, P63, P37, P49, P43, P19, P33, D7	14
2L	426906	C	G	germline_recurrent	P35, P31, P15, P63, P29, P37, P19, P33	8
2L	428272	A	G	germline_recurrent	P35, P41, P11, D3, P65, P31, P59, D5, P17, P53, P15, P27, P9, P57, D1, P63, P29, P23, P51, P37, P7, P49, P43, P25, P19, P45a, P55, P33, D7, P61	30
2L	428423	C	T	germline_recurrent	P35, P41, P11, D3, P65, P31, P59, D5, P53, P15, P27, P9, P57, D1, P63, P29, P39, P23, P51, P37, P7, P49, P43, P25, P19, P45a, P55, P33, D7, P61	30
2L	428672	A	T	germline_recurrent	P35, P41, P11, P65, P31, P59, P17, P53, P15, P27, P9, P57, P63, P29, P39, P47, P23, P51, P37, P49, P43, P19, P45a, P55, P33, P61	26
2L	429851	C	T	germline_recurrent	P35, P41, P11, P5, D3, P65, P31, P59, D5, P53, P15, P27, P9, P57, D1, P63, P29, P47, P23, P51, P37, P49, P43, P25, P19, P45a, P55, P33, D7, P61	30
2L	430672	A	T	germline_recurrent	P35, P41, P11, P5, D3, P65, P31, P59, D5, P17, P53, P15, P27, P9, P57, D1, P63, P29, P3, P47, P51, P37, P7, P49, P43, P25, P19, P45a, P55, P33, D7, P61	32
2L	431370	A	G	germline_recurrent	P35, P41, P11, D3, P65, P31, P59, D5, P53, P15, P27, P9, P57, D1, P63, P29, P39, P47, P23, P51, P37, P7, P49, P43, P25, P19, P45a, P55, P33, D7, P61	31
2L	431420	C	A	germline_recurrent	P35, P41, P11, D3, P65, P31, P59, D5, P53, P15, P27, P9, P57, D1, P63, P29, P39, P23, P51, P37, P49, P43, P25, P19, P45a, P55, P33, D7, P61	29
2L	432453	C	A	germline_recurrent	P35, P41, P11, P5, D3, P65, P31, P59, P17, P53, P15, P27, P9, P57, D1, P63, P29, P39, P47, P51, P37, P49, P43, P19, P45a, P55, P33, D7, P61	29
2L	432716	G	C	germline_recurrent	P35, P41, P11, P5, D3, P65, P31, P59, D5, P17, P53, P15, P27, P9, P57, D1, P63, P29, P39, P3, P47, P23, P51, P37, P49, P43, P25, P19, P45a, P55, P33, D7, P61	33
2L	433451	C	T	germline_recurrent	P35, P41, P11, P5, D3, P65, P31, P59, P17, P53, P15, P27, P9, P57, D1, P63, P29, P39, P3, P47, P23, P51, P37, P7, P49, P43, P19, P45a, P55, P33, D7, P61	32
2L	434567	T	G	germline_recurrent	P35, P41, P11, P65, P31, P59, P53, P15, P27, P9, P1, P57, P63, P29, P39, P47, P23, P51, P37, P49, P43, P25, P19, P45a, P55, P33, P61	27
2L	434997	A	G	germline_recurrent	P35, P41, P11, D3, P65, P31, P59, D5, P17, P53, P15, P27, P9, P57, D1, P63, P29, P39, P3, P47, P23, P51, P37, P7, P49, P43, P25, P19, P45a, P55, P33, D7, P61	33
2L	435397	A	T	germline_recurrent	P35, P41, P11, D3, P65, P31, P59, D5, P53, P15, P27, P9, P57, D1, P63, P29, P23, P51, P37, P49, P43, P25, P19, P45a, P55, P33, D7, P61	28
2L	435431	G	C	germline_recurrent	P35, P41, P11, D3, P65, P31, P59, D5, P53, P15, P27, P9, P57, D1, P63, P29, P47, P23, P51, P37, P49, P43, P25, P19, P45a, P55, P33, D7, P61	29
2L	436023	A	C	germline_recurrent	P35, P11, D3, P65, P31, P17, P15, P9, D1, P29, P37, P7, P19, P33, D7	15
2L	436179	C	T	germline_recurrent	P35, P41, P11, P5, D3, P65, P31, P59, P53, P15, P27, P9, P57, D1, P63, P29, P3, P47, P37, P49, P43, P25, P19, P45a, P55, P33, D7	27
2L	436207	T	A	germline_recurrent	P35, P41, P11, D3, P65, P31, P59, P53, P15, P27, P9, P57, D1, P63, P29, P3, P47, P37, P49, P43, P25, P19, P45a, P33, D7	25
2L	436286	C	G	germline_recurrent	P35, P41, P11, P5, D3, P65, P31, P59, D5, P53, P15, P27, P9, P57, D1, P63, P29, P47, P37, P49, P43, P19, P45a, P55, P33, D7, P61	27
2L	436551	A	G	germline_recurrent	P35, P41, P11, P5, D3, P65, P31, P59, D5, P53, P15, P27, P9, P57, D1, P63, P29, P39, P47, P51, P37, P49, P43, P25, P19, P45a, P55, P33, D7, P61	30
2L	436671	C	G	germline_recurrent	P35, P41, P11, P5, D3, P65, P31, P59, D5, P17, P53, P15, P27, P9, P57, D1, P63, P29, P3, P47, P51, P37, P49, P43, P25, P19, P45a, P55, P33, D7, P61	31
2L	436747	C	T	germline_recurrent	P35, P41, P11, D3, P65, P31, P59, D5, P53, P15, P27, P9, P57, D1, P63, P29, P3, P47, P51, P37, P49, P43, P25, P19, P45a, P55, P33, D7, P61	29
2L	436900	T	C	germline_recurrent	P35, P41, P11, P5, D3, P65, P31, P59, D5, P17, P53, P15, P27, P9, P57, D1, P63, P29, P39, P47, P37, P49, P43, P19, P45a, P55, P33, P61	28
2L	437215	A	G	germline_recurrent	P35, P41, P11, D3, P65, P31, P59, D5, P53, P15, P27, P9, P57, D1, P63, P29, P3, P37, P49, P43, P25, P19, P45a, P55, P33, D7	26
2L	437253	C	A	germline_recurrent	P35, P41, P11, D3, P65, P31, P59, D5, P53, P15, P27, P9, P57, D1, P63, P29, P3, P47, P37, P49, P43, P19, P55, P33, D7, P61	26
2L	437487	T	C	germline_recurrent	P35, P41, P11, P5, D3, P65, P31, P59, D5, P17, P53, P15, P27, P9, P57, D1, P63, P29, P39, P47, P23, P51, P37, P49, P43, P25, P19, P45a, P55, P33, D7, P61	32
2L	437495	G	C	germline_recurrent	P35, P41, P11, P5, D3, P65, P31, P59, D5, P17, P53, P15, P27, P9, P57, D1, P63, P29, P39, P47, P23, P51, P37, P49, P43, P19, P45a, P55, P33, D7, P61	31
2L	437806	C	G	germline_recurrent	P35, P41, P11, D3, P65, P31, P59, D5, P17, P53, P15, P27, P9, P57, D1, P63, P29, P3, P47, P23, P51, P37, P49, P43, P25, P19, P45a, P55, P33, D7, P61	31
2L	438155	A	C	germline_recurrent	P35, P41, P11, D3, P65, P31, P59, D5, P53, P15, P27, P9, P57, D1, P63, P29, P47, P37, P49, P43, P19, P55, P33, D7	24
2L	438167	T	G	germline_recurrent	P35, P41, P11, D3, P65, P31, P59, D5, P53, P15, P9, P57, D1, P63, P29, P47, P37, P49, P43, P19, P33, D7	22
2L	439486	C	T	germline_recurrent	P35, P41, P11, D3, P65, P31, P59, P53, P15, P27, P9, P57, D1, P63, P29, P47, P51, P37, P49, P43, P19, P45a, P33, D7, P61	25
2L	439541	T	A	germline_recurrent	P35, P41, P11, P5, D3, P65, P31, P59, D5, P17, P53, P15, P27, P9, P57, D1, P63, P29, P39, P47, P51, P37, P7, P49, P43, P19, P45a, P55, P33, D7, P61	31
2L	439568	G	A	germline_recurrent	P35, P41, P11, P5, D3, P65, P31, P59, D5, P17, P53, P15, P27, P9, P57, D1, P63, P29, P39, P47, P51, P37, P7, P49, P43, P25, P19, P45a, P55, P33, D7, P61	32
2L	439803	T	C	germline_recurrent	P35, P41, P11, D3, P31, P59, D5, P53, P15, P27, P9, P57, D1, P63, P29, P3, P47, P23, P37, P49, P43, P25, P19, P45a, P55, P33, D7, P61	28
2L	440085	C	A	germline_recurrent	P35, P41, P11, P5, D3, P65, P31, D5, P53, P15, P9, D1, P63, P29, P37, P49, P43, P19, P33, D7	20
2L	440103	A	G	germline_recurrent	P35, P41, P11, P65, P31, P59, P53, P15, P9, P63, P29, P3, P47, P51, P37, P49, P43, P19, P55, P33	20
2L	440369	T	C	germline_recurrent	P35, P41, P11, P31, P59, P53, P15, P27, P9, P1, P57, P63, P29, P47, P23, P51, P37, P7, P49, P43, P25, P19, P55, P33	24
2L	440876	C	A	germline_recurrent	P35, P41, P11, D3, P65, P31, P59, D5, P53, P15, P27, P9, P57, D1, P63, P29, P47, P23, P51, P37, P49, P43, P19, P45a, P55, P33, D7, P61	28
2L	441144	C	G	germline_recurrent	P35, P11, P65, P31, P59, P53, P15, P9, P63, P29, P47, P37, P49, P43, P19, P45a, P33, P61	18
2L	441169	C	T	germline_recurrent	P35, P41, P11, D3, P65, P31, P59, D5, P53, P15, P27, P9, P57, D1, P63, P29, P47, P37, P49, P43, P19, P45a, P33, D7, P61	25
2L	441794	C	T	germline_recurrent	P35, P41, P11, P5, D3, P65, P31, P59, D5, P53, P15, P27, P9, P57, D1, P63, P29, P39, P47, P23, P51, P37, P49, P43, P25, P19, P45a, P55, P33, D7, P61	31
2L	441876	A	T	germline_recurrent	P35, P41, P11, P5, D3, P65, P31, P59, D5, P17, P53, P15, P27, P9, P57, D1, P63, P29, P47, P23, P51, P37, P49, P43, P25, P19, P45a, P55, P33, D7, P61	31
2L	442088	A	T	germline_recurrent	P35, P41, P11, P5, D3, P65, P31, P59, D5, P17, P53, P15, P27, P9, P57, D1, P63, P29, P39, P47, P23, P51, P37, P7, P49, P43, P25, P19, P45a, P55, P33, D7, P61	33
2L	442101	C	T	germline_recurrent	P35, P41, P11, D3, P65, P31, P59, D5, P17, P53, P15, P27, P9, P57, D1, P63, P29, P39, P47, P23, P51, P37, P7, P49, P43, P25, P19, P45a, P55, P33, D7, P61	32
2L	442260	G	C	germline_recurrent	P35, P41, P11, P5, D3, P65, P31, P59, D5, P17, P53, P15, P27, P9, P57, D1, P63, P29, P39, P3, P47, P23, P51, P37, P7, P49, P43, P25, P19, P45a, P55, P33, D7, P61	34
2L	442542	T	G	germline_recurrent	P35, P41, P11, P5, D3, P65, P31, P59, D5, P17, P53, P15, P27, P9, P57, D1, P63, P29, P47, P23, P51, P37, P49, P43, P19, P45a, P55, P33, D7	29
2L	443477	A	G	germline_recurrent	P35, P41, P11, D3, P65, P31, P59, P17, P53, P15, P27, P9, P57, D1, P63, P29, P39, P47, P23, P51, P37, P7, P49, P43, P25, P19, P45a, P55, P33, P61	30
2L	443488	C	T	germline_recurrent	P35, P41, P11, P5, D3, P65, P31, P59, P17, P53, P15, P27, P9, P57, D1, P63, P29, P39, P47, P23, P51, P37, P49, P43, P25, P19, P45a, P55, P33, P61	30
2L	443558	T	C	germline_recurrent	P35, P41, P11, D3, P65, P31, P59, D5, P17, P53, P15, P27, P9, P57, D1, P63, P29, P39, P47, P23, P51, P37, P7, P49, P43, P25, P19, P45a, P55, P33, D7, P61	32
2L	443882	C	A	germline_recurrent	P35, P41, P11, P65, P31, P59, P17, P53, P15, P27, P9, P57, P63, P29, P39, P47, P23, P51, P37, P7, P49, P43, P25, P19, P45a, P55, P33, P61	28
2L	443937	A	G	germline_recurrent	P35, P41, P11, P65, P31, P59, P17, P53, P15, P27, P9, P57, P63, P29, P39, P47, P23, P51, P37, P7, P49, P43, P25, P19, P45a, P55, P33, P61	28
2L	444596	C	T	germline_recurrent	P35, P41, P11, P5, D3, P65, P31, P59, D5, P53, P15, P27, P9, P57, D1, P63, P29, P39, P47, P51, P37, P7, P49, P43, P25, P19, P45a, P55, P33, D7, P61	31
2L	444671	A	T	germline_recurrent	P35, P41, P11, P5, D3, P65, P31, P59, D5, P53, P15, P27, P9, P57, D1, P63, P29, P39, P47, P51, P37, P49, P43, P25, P19, P45a, P55, P33, D7, P61	30
2L	444713	G	A	germline_recurrent	P35, P41, P11, D3, P65, P31, P59, D5, P53, P15, P27, P9, P57, D1, P63, P29, P39, P47, P23, P51, P37, P7, P49, P43, P25, P19, P45a, P55, P33, D7, P61	31
2L	445199	T	C	germline_recurrent	P35, P41, P11, P5, D3, P65, P31, P59, D5, P17, P53, P15, P27, P9, P57, D1, P63, P29, P39, P47, P23, P51, P37, P7, P49, P43, P25, P19, P45a, P55, P33, D7, P61	33
2L	445373	A	G	germline_recurrent	P35, P41, P11, D3, P65, P31, P59, D5, P17, P53, P15, P27, P9, P57, D1, P63, P29, P39, P3, P47, P23, P51, P37, P49, P43, P25, P19, P55, P33, D7, P61	31
2L	445467	A	C	germline_recurrent	P35, P41, P11, D3, P65, P31, P59, D5, P53, P15, P27, P9, P57, D1, P63, P29, P47, P23, P51, P37, P7, P49, P43, P25, P19, P55, P33, D7, P61	29
2L	447436	T	C	germline_recurrent	P35, P41, P11, P65, P31, P59, P17, P53, P15, P27, P9, P57, P63, P29, P39, P47, P23, P51, P37, P7, P49, P43, P25, P19, P45a, P55, P33, P61	28
2L	447525	A	G	germline_recurrent	P35, P41, P11, P5, D3, P65, P31, P59, D5, P17, P53, P15, P27, P9, P57, D1, P63, P29, P39, P47, P23, P51, P37, P7, P49, P43, P25, P19, P45a, P55, P33, D7, P61	33
2L	447687	G	C	germline_recurrent	P35, P41, P11, P65, P31, P59, P53, P15, P27, P9, P57, P63, P29, P39, P3, P47, P23, P51, P37, P7, P49, P43, P25, P19, P45a, P55, P33, P61	28
2L	448655	C	T	germline_recurrent	P35, P11, P5, D3, P31, P15, P9, P1, D1, P29, P3, P37, P43, P19, P33, D7	16
2L	449188	G	T	germline_recurrent	P35, P41, P11, D3, P65, P31, P59, D5, P17, P53, P15, P27, P9, P57, D1, P63, P29, P39, P47, P23, P51, P37, P7, P49, P43, P25, P19, P45a, P55, P33, D7, P61	32
2L	449545	C	T	germline_recurrent	P35, P41, P11, P65, P31, P59, P17, P53, P15, P27, P9, P57, P63, P29, P39, P47, P23, P51, P37, P7, P49, P43, P25, P19, P45a, P55, P33, P61	28
2L	450919	T	C	germline_recurrent	P35, P41, P11, P65, P31, P59, P53, P15, P27, P9, P57, P63, P29, P39, P51, P37, P7, P49, P43, P25, P19, P55, P33, P61	24
2L	451184	A	C	germline_recurrent	P35, P41, P11, D3, P65, P31, P59, D5, P17, P53, P15, P27, P9, P57, D1, P63, P29, P47, P51, P37, P7, P49, P43, P25, P19, P45a, P55, P33, D7, P61	30
2L	451472	T	G	germline_recurrent	P35, P41, P11, P5, D3, P65, P31, P59, D5, P17, P53, P15, P27, P9, P57, D1, P63, P29, P47, P23, P51, P37, P7, P49, P43, P25, P19, P45a, P55, P33, D7, P61	32
2L	452159	T	G	germline_recurrent	P35, P41, P11, P5, D3, P65, P31, P59, P17, P53, P15, P27, P9, P57, D1, P63, P29, P47, P23, P51, P37, P7, P49, P43, P25, P19, P45a, P55, P33, D7, P61	31
2L	452581	T	A	germline_recurrent	P35, P41, P11, P5, D3, P65, P31, P59, D5, P17, P53, P15, P27, P9, P57, D1, P63, P29, P39, P47, P51, P37, P7, P49, P43, P25, P19, P45a, P55, P33, D7, P61	32
2L	452796	A	T	germline_recurrent	P35, P41, P11, P5, D3, P65, P31, P59, D5, P53, P15, P27, P9, P1, P57, D1, P63, P29, P3, P47, P23, P51, P37, P49, P43, P25, P19, P45a, P55, P33, D7, P61	32
2L	455960	C	T	germline_recurrent	P35, P41, P11, P5, D3, P65, P31, P59, D5, P17, P53, P15, P27, P9, P57, D1, P63, P29, P23, P51, P37, P49, P43, P25, P19, P45a, P55, P33, D7, P61	30
2L	456595	T	C	germline_recurrent	P35, P41, P11, D3, P65, P31, P59, D5, P17, P53, P15, P27, P9, P57, D1, P63, P29, P39, P47, P23, P51, P37, P7, P49, P43, P25, P19, P45a, P55, P33, D7, P61	32
2L	457325	C	T	germline_recurrent	P35, P41, P11, P5, D3, P65, P31, P59, D5, P53, P15, P27, P9, P57, D1, P63, P29, P39, P23, P51, P37, P49, P43, P25, P19, P45a, P55, P33, D7, P61	30
2L	457362	C	T	germline_recurrent	P35, P41, P11, D3, P65, P31, P59, D5, P53, P15, P27, P9, P57, D1, P63, P29, P47, P23, P51, P37, P49, P43, P25, P19, P45a, P55, P33, D7, P61	29
2L	457661	C	T	germline_recurrent	P35, P41, P11, P5, D3, P65, P31, P59, D5, P53, P15, P27, P9, P57, D1, P63, P29, P39, P51, P37, P7, P49, P43, P25, P19, P45a, P55, P33, D7, P61	30
2L	458285	T	C	germline_recurrent	P35, P41, P11, D3, P65, P31, P59, D5, P17, P53, P15, P27, P9, P57, D1, P63, P29, P39, P47, P23, P51, P37, P7, P49, P43, P25, P19, P55, P33, D7, P61	31
2L	458429	C	T	germline_recurrent	P35, P41, P11, P5, D3, P65, P31, P59, D5, P53, P15, P27, P9, P57, D1, P63, P29, P39, P47, P23, P51, P37, P7, P49, P43, P25, P19, P55, P33, D7, P61	31
2L	458442	A	G	germline_recurrent	P35, P41, P11, P5, D3, P65, P31, P59, D5, P53, P15, P27, P9, P57, D1, P63, P29, P47, P23, P51, P37, P7, P49, P43, P25, P19, P55, P33, D7, P61	30
2L	458872	G	A	germline_recurrent	P35, P41, P11, P65, P31, P15, P9, P63, P29, P47, P37, P43, P19, P33	14
2L	458936	T	G	germline_recurrent	P35, P41, P11, P5, D3, P65, P31, P59, D5, P17, P15, P9, D1, P63, P29, P47, P37, P49, P43, P19, P45a, P33, D7	23
2L	459010	A	C	germline_recurrent	P35, P41, P11, P5, D3, P65, P31, P59, P17, P53, P15, P9, P57, D1, P63, P29, P47, P51, P37, P49, P43, P19, P45a, P33	24
2L	459470	C	T	germline_recurrent	P35, P41, P11, P5, D3, P65, P31, P59, D5, P17, P53, P15, P27, P9, P57, D1, P63, P29, P39, P3, P47, P23, P51, P37, P7, P49, P43, P25, P19, P45a, P55, P33, D7, P61	34
2L	459576	C	T	germline_recurrent	P35, P41, P11, P5, D3, P65, P31, P59, D5, P53, P15, P27, P9, P57, D1, P63, P29, P39, P47, P23, P51, P37, P7, P49, P43, P25, P19, P45a, P55, P33, D7, P61	32
2L	459604	C	T	germline_recurrent	P35, P41, P11, P5, D3, P65, P31, P59, D5, P53, P15, P27, P9, P57, D1, P63, P29, P39, P47, P23, P51, P37, P7, P49, P43, P25, P19, P45a, P55, P33, D7, P61	32
2L	459777	A	T	germline_recurrent	P35, P41, P11, P5, D3, P65, P31, P59, D5, P53, P15, P27, P9, P1, P57, D1, P63, P29, P39, P3, P47, P51, P37, P7, P49, P43, P25, P19, P55, P33, D7, P61	32
2L	460138	T	A	germline_recurrent	P35, P41, P11, P5, D3, P65, P31, P59, D5, P53, P15, P27, P9, P57, D1, P63, P29, P39, P47, P51, P37, P7, P49, P43, P25, P19, P55, P33, D7	29
2L	461581	A	G	germline_recurrent	P35, P41, P11, D3, P65, P31, P59, D5, P17, P53, P15, P27, P9, P57, D1, P63, P29, P39, P47, P23, P51, P37, P7, P49, P43, P25, P19, P45a, P55, P33, D7, P61	32
2L	461730	A	G	germline_recurrent	P35, P41, P11, P65, P31, P59, P17, P53, P15, P27, P9, P57, P63, P29, P39, P3, P23, P51, P37, P7, P49, P43, P25, P19, P45a, P55, P33, P61	28
2L	461802	T	C	germline_recurrent	P35, P41, P11, D3, P65, P31, P59, D5, P53, P15, P27, P9, P57, D1, P63, P29, P47, P23, P51, P37, P7, P49, P43, P25, P19, P45a, P55, P33, D7, P61	30
2L	462506	A	C	germline_recurrent	P35, P41, P11, D3, P65, P31, P59, D5, P17, P53, P15, P27, P9, P57, D1, P63, P29, P39, P3, P47, P23, P51, P37, P7, P49, P43, P25, P19, P45a, P55, P33, D7, P61	33
2L	462763	G	C	germline_recurrent	P35, P41, P11, P65, P31, P59, P17, P53, P15, P27, P9, P57, P63, P29, P39, P3, P47, P23, P51, P37, P7, P49, P43, P25, P19, P45a, P55, P33, P61	29
2L	463002	G	T	germline_recurrent	P35, P41, P11, D3, P65, P31, P59, D5, P17, P53, P15, P27, P9, P57, D1, P63, P29, P39, P47, P23, P51, P37, P7, P49, P43, P25, P19, P45a, P55, P33, D7, P61	32
2L	464034	C	A	germline_recurrent	P35, P41, P11, D3, P65, P31, P59, D5, P17, P53, P15, P27, P9, P57, D1, P63, P29, P39, P47, P23, P51, P37, P7, P49, P43, P25, P19, P45a, P55, P33, D7, P61	32
2L	464136	A	G	germline_recurrent	P35, P41, P11, D3, P65, P31, P59, D5, P17, P53, P15, P27, P9, P57, D1, P63, P29, P39, P47, P23, P51, P37, P7, P49, P43, P25, P19, P45a, P55, P33, D7, P61	32
2L	464582	G	C	germline_recurrent	P35, P41, P11, D3, P65, P31, P59, D5, P53, P15, P27, P9, P57, D1, P63, P29, P39, P47, P23, P51, P37, P7, P49, P43, P25, P19, P45a, P55, P33, D7, P61	31
2L	464646	C	G	germline_recurrent	P35, P41, P11, P65, P31, P59, P17, P53, P15, P27, P9, P57, P63, P29, P39, P47, P51, P37, P7, P49, P43, P25, P19, P55, P33, P61	26
2L	464760	G	A	germline_recurrent	P35, P41, P11, D3, P65, P31, P59, D5, P53, P15, P27, P9, P57, D1, P63, P29, P47, P23, P51, P37, P49, P43, P25, P19, P45a, P33, D7, P61	28
2L	464880	A	T	germline_recurrent	P35, P41, P11, D3, P65, P31, P59, D5, P17, P53, P15, P27, P9, P57, D1, P63, P29, P39, P47, P23, P51, P37, P7, P49, P43, P25, P19, P55, P33, D7, P61	31
2L	464953	T	G	germline_recurrent	P35, P41, P11, D3, P65, P31, P59, P17, P53, P15, P27, P9, P57, D1, P63, P29, P39, P37, P7, P49, P43, P19, P45a, P55, P33, D7, P61	27
2L	465047	A	T	germline_recurrent	P35, P41, P11, P65, P31, P59, P53, P15, P9, P57, P63, P29, P3, P51, P37, P49, P43, P19, P45a, P33	20
2L	465374	A	G	germline_recurrent	P35, P41, P11, P5, D3, P65, P31, P59, P17, P53, P15, P27, P9, P57, D1, P63, P29, P39, P47, P51, P37, P49, P43, P19, P45a, P55, P33, D7, P61	29
2L	465424	G	T	germline_recurrent	P35, P41, P11, P5, D3, P65, P31, P59, D5, P17, P53, P15, P27, P9, P57, D1, P63, P29, P39, P47, P51, P37, P7, P49, P43, P25, P19, P45a, P55, P33, D7, P61	32
2L	465711	T	A	germline_recurrent	P35, P41, P11, P65, P31, P59, P53, P15, P27, P9, P57, P63, P29, P39, P3, P47, P23, P51, P37, P7, P49, P43, P25, P19, P45a, P55, P33, P61	28
2L	465727	C	G	germline_recurrent	P35, P41, P11, P65, P31, P59, P53, P15, P27, P9, P57, P63, P29, P39, P47, P23, P51, P37, P7, P49, P43, P25, P19, P45a, P55, P33, P61	27
2L	465790	G	A	germline_recurrent	P35, P41, P11, D3, P65, P31, P59, D5, P53, P15, P27, P9, P57, D1, P63, P29, P39, P47, P51, P37, P7, P49, P43, P25, P19, P45a, P55, P33, D7, P61	30
2L	465816	A	T	germline_recurrent	P35, P41, P11, D3, P65, P31, P59, P53, P15, P27, P9, P57, D1, P63, P29, P39, P47, P51, P37, P7, P49, P43, P19, P45a, P55, P33, P61	27
2L	465940	C	A	germline_recurrent	P35, P41, P11, P5, D3, P65, P31, P59, D5, P17, P53, P15, P27, P9, P57, D1, P63, P29, P39, P47, P23, P51, P37, P7, P49, P43, P25, P19, P45a, P55, P33, D7, P61	33
2L	466182	A	G	germline_recurrent	P35, P41, P11, P65, P31, P59, P53, P15, P27, P9, P57, P63, P29, P39, P47, P23, P51, P37, P7, P49, P43, P25, P19, P45a, P55, P33, P61	27
2L	466359	C	T	germline_recurrent	P35, P41, P11, P65, P31, P59, P53, P15, P27, P9, P57, P63, P29, P39, P47, P23, P51, P37, P7, P49, P43, P25, P19, P45a, P55, P33, P61	27
2L	466416	A	G	germline_recurrent	P35, P41, P11, P5, D3, P65, P31, P59, D5, P17, P53, P15, P27, P9, P57, D1, P63, P29, P39, P47, P23, P51, P37, P7, P49, P43, P25, P19, P45a, P55, P33, D7, P61	33
2L	466468	A	G	germline_recurrent	P35, P41, P11, P65, P31, P59, P17, P53, P15, P27, P9, P57, P63, P29, P39, P47, P51, P37, P7, P49, P43, P25, P19, P45a, P55, P33, P61	27
2L	466504	G	A	germline_recurrent	P35, P41, P11, P5, D3, P65, P31, P59, D5, P17, P53, P15, P27, P9, P57, D1, P63, P29, P39, P47, P51, P37, P49, P43, P19, P45a, P55, P33, D7, P61	30
2L	466537	C	T	germline_recurrent	P35, P41, P11, P5, D3, P65, P31, P59, P17, P53, P15, P27, P9, P57, D1, P63, P29, P39, P47, P51, P37, P49, P43, P19, P45a, P55, P33, D7, P61	29
2L	467141	A	G	germline_recurrent	P35, P41, P11, D3, P65, P31, P59, D5, P17, P53, P15, P27, P9, P57, D1, P63, P29, P39, P47, P23, P51, P37, P7, P49, P43, P25, P19, P45a, P55, P33, D7, P61	32
2L	467285	C	T	germline_recurrent	P35, P41, P11, P5, D3, P65, P31, P59, D5, P53, P15, P9, P57, D1, P63, P29, P3, P47, P37, P49, P43, P19, P45a, P55, P33, D7, P61	27
2L	467327	A	T	germline_recurrent	P35, P41, P11, D3, P65, P31, P59, P53, P15, P9, P57, D1, P63, P29, P3, P47, P37, P49, P43, P19, P45a, P33, P61	23
2L	467346	T	A	germline_recurrent	P35, P41, P11, P5, D3, P31, P53, P15, P9, P57, D1, P63, P29, P3, P47, P37, P49, P43, P19, P45a, P33	21
2L	467357	G	A	germline_recurrent	P35, P41, P11, P5, D3, P31, P59, P53, P15, P9, P57, D1, P63, P29, P39, P3, P47, P37, P49, P43, P19, P45a	22
2L	467492	G	A	germline_recurrent	P35, P41, P11, P5, D3, P65, P31, P59, D5, P17, P53, P15, P27, P9, P57, D1, P63, P29, P47, P23, P51, P37, P7, P49, P43, P19, P55, P33, D7, P61	30
2L	467663	A	T	germline_recurrent	P35, P41, P11, D3, P65, P31, P59, D5, P17, P53, P15, P27, P9, P57, D1, P63, P29, P39, P47, P23, P51, P37, P7, P49, P43, P25, P19, P45a, P55, P33, D7	31
2L	467704	G	T	germline_recurrent	P35, P41, P11, P5, D3, P65, P31, P59, D5, P17, P53, P15, P27, P9, P57, D1, P63, P29, P39, P47, P51, P37, P49, P43, P25, P19, P45a, P55, P33, D7, P61	31
2L	467717	C	T	germline_recurrent	P35, P41, P11, P5, D3, P65, P31, P59, D5, P53, P15, P27, P9, P57, D1, P63, P29, P39, P47, P51, P37, P49, P43, P25, P19, P45a, P55, P33, D7, P61	30
2L	467813	C	G	germline_recurrent	P35, P41, P11, D3, P31, P59, D5, P53, P15, P27, P9, P57, D1, P63, P29, P47, P23, P51, P37, P43, P25, P19, P55, P33, D7, P61	26
2L	467972	G	A	germline_recurrent	P35, P41, P11, P65, P31, P59, P53, P15, P27, P9, P57, P63, P29, P39, P23, P51, P37, P7, P49, P43, P19, P45a, P55, P33, P61	25
2L	468431	T	C	germline_recurrent	P35, P41, P11, P5, D3, P65, P31, P59, D5, P53, P15, P27, P9, P57, D1, P63, P29, P39, P47, P23, P51, P37, P7, P49, P43, P25, P19, P45a, P55, P33, D7, P61	32
2L	468585	T	C	germline_recurrent	P35, P41, P11, P5, D3, P65, P31, P59, D5, P17, P53, P15, P27, P9, P57, D1, P63, P29, P39, P47, P23, P51, P37, P7, P49, P43, P25, P19, P45a, P55, P33, D7, P61	33
2L	468614	C	A	germline_recurrent	P35, P41, P11, P5, D3, P65, P31, P59, D5, P17, P53, P15, P27, P9, P57, D1, P63, P29, P39, P47, P23, P51, P37, P7, P49, P43, P25, P19, P45a, P55, P33, D7, P61	33
2L	468651	C	G	germline_recurrent	P35, P41, P11, P5, D3, P65, P31, P59, D5, P17, P53, P15, P27, P9, P57, D1, P63, P29, P47, P51, P37, P7, P49, P43, P25, P19, P45a, P55, P33, D7, P61	31
2L	468936	C	A	germline_recurrent	P35, P41, P11, D3, P65, P31, P59, D5, P17, P53, P15, P27, P9, P57, D1, P63, P29, P39, P47, P51, P37, P7, P49, P43, P25, P19, P45a, P55, P33, D7, P61	31
2L	469053	T	C	germline_recurrent	P35, P41, P11, P65, P31, P59, P53, P15, P27, P9, P57, P63, P29, P39, P47, P23, P51, P37, P7, P49, P43, P25, P19, P45a, P55, P33, P61	27
2L	469414	A	C	germline_recurrent	P35, P41, P11, D3, P65, P31, P59, D5, P17, P53, P15, P27, P9, P57, D1, P63, P29, P39, P47, P23, P51, P37, P49, P43, P25, P19, P45a, P55, P33, D7, P61	31
2L	469446	G	A	germline_recurrent	P35, P41, P11, D3, P65, P31, P59, D5, P17, P53, P15, P27, P9, P57, D1, P63, P29, P47, P23, P51, P37, P7, P49, P43, P25, P19, P55, P33, D7, P61	30
2L	469453	A	G	germline_recurrent	P35, P41, P11, D3, P65, P31, P59, D5, P17, P53, P15, P27, P9, P57, D1, P63, P29, P47, P23, P51, P37, P7, P49, P43, P25, P19, P55, P33, D7, P61	30
2L	469599	G	T	germline_recurrent	P35, P41, P11, P65, P31, P59, P17, P53, P15, P27, P9, P1, P57, P63, P29, P39, P47, P23, P51, P37, P7, P49, P43, P25, P19, P45a, P55, P33, P61	29
2L	469612	T	G	germline_recurrent	P35, P41, P11, P65, P31, P59, P17, P53, P15, P27, P9, P57, P63, P29, P39, P47, P23, P51, P37, P7, P49, P43, P25, P19, P45a, P55, P33, P61	28
2L	469685	T	G	germline_recurrent	P35, P41, P11, D3, P65, P31, P59, P17, P53, P15, P27, P9, P1, P57, D1, P63, P29, P39, P47, P51, P37, P7, P49, P43, P25, P19, P45a, P55, P33, D7, P61	31
2L	469710	T	C	germline_recurrent	P35, P41, P11, P5, D3, P65, P31, P59, P17, P53, P15, P27, P9, P1, P57, D1, P63, P29, P3, P47, P37, P7, P49, P43, P25, P19, P45a, P55, P33, D7, P61	31
2L	469941	A	G	germline_recurrent	P35, P41, P11, D3, P53, P15, P9, D1, P29, P3, P37, P43, P33	13
2L	470163	C	T	germline_recurrent	P35, P41, P11, D3, P65, P31, P59, D5, P17, P53, P15, P27, P9, P57, D1, P63, P29, P47, P23, P37, P7, P49, P43, P25, P19, P45a, P33, D7	28
2L	470361	T	A	germline_recurrent	P35, P11, P5, P31, P17, P53, P9, P63, P29, P37, P19, P33	12
2L	470674	A	T	germline_recurrent	P35, P41, P11, P5, D3, P65, P31, P59, D5, P17, P53, P15, P27, P9, P57, D1, P63, P29, P37, P49, P43, P19, P45a, P33, D7, P61	26
2L	470758	G	A	germline_recurrent	P35, P41, P11, P5, D3, P65, P31, D5, P53, P15, P27, P9, P57, D1, P63, P29, P3, P47, P23, P37, P49, P43, P19, P45a, P55, P33, D7, P61	28
2L	471163	C	G	germline_recurrent	P35, P41, P11, P5, D3, P65, P31, P59, P53, P15, P27, P9, P57, D1, P63, P29, P47, P37, P49, P43, P19, P45a, P55, P33, D7, P61	26
2L	471468	G	T	germline_recurrent	P35, P41, P11, P5, D3, P65, P31, P59, D5, P17, P53, P15, P27, P9, P57, D1, P63, P29, P37, P49, P43, P19, P45a, P55, P33, D7, P61	27
2L	471840	A	T	germline_recurrent	P35, P41, P11, P65, P31, P59, P17, P53, P15, P27, P9, P57, P63, P29, P47, P51, P37, P49, P43, P25, P19, P45a, P55, P33, P61	25
2L	471954	A	G	germline_recurrent	P35, P41, P11, P5, D3, P65, P31, P59, D5, P17, P53, P15, P27, P9, P57, D1, P63, P29, P39, P3, P47, P23, P51, P37, P49, P43, P25, P19, P45a, P55, P33, D7, P61	33
2L	472126	G	A	germline_recurrent	P35, P41, P11, P65, P31, P59, P53, P15, P27, P9, P57, P63, P29, P39, P3, P23, P51, P37, P49, P43, P25, P19, P45a, P55, P33, P61	26
2L	472498	T	C	germline_recurrent	P35, P41, P11, P5, D3, P65, P31, P59, D5, P17, P53, P15, P27, P9, P57, D1, P63, P29, P39, P47, P23, P51, P37, P49, P43, P25, P19, P45a, P55, P33, D7, P61	32
2L	472514	G	A	germline_recurrent	P35, P41, P11, P5, D3, P65, P31, P59, D5, P17, P53, P15, P27, P9, P57, D1, P63, P29, P39, P47, P23, P51, P37, P49, P43, P25, P19, P45a, P55, P33, D7, P61	32
2L	472697	G	C	germline_recurrent	P35, P41, P11, P5, D3, P65, P31, P59, P17, P53, P15, P27, P9, P1, P57, D1, P63, P29, P47, P37, P49, P43, P19, P45a, P55, P33, D7	27
2L	472960	C	A	germline_recurrent	P35, P41, P11, D3, P31, P59, P15, P9, P1, D1, P63, P29, P3, P37, P7, P43, P19, P45a, P33, D7	20
2L	472967	T	A	germline_recurrent	P35, P41, P11, D3, P31, P59, P15, P9, P1, D1, P63, P29, P3, P37, P7, P43, P19, P45a, P33, D7	20
2L	473033	C	G	germline_recurrent	P35, P41, P11, D3, P65, P31, P59, D5, P17, P53, P15, P27, P9, P57, D1, P63, P29, P39, P47, P23, P37, P7, P49, P43, P19, P45a, P55, P33, D7	29
2L	473223	C	T	germline_recurrent	P35, P41, P11, D3, P65, P31, P59, D5, P17, P53, P15, P27, P9, P57, D1, P63, P29, P47, P23, P37, P7, P49, P43, P25, P19, P45a, P55, P33, D7, P61	30
2L	473293	C	A	germline_recurrent	P35, P41, P11, P5, P65, P31, P59, P17, P53, P15, P27, P9, P57, P63, P29, P47, P51, P37, P7, P49, P43, P25, P19, P45a, P55, P33, P61	27
2L	473424	G	A	germline_recurrent	P35, P41, P11, D3, P65, P31, P59, D5, P17, P53, P15, P27, P9, P57, D1, P63, P29, P39, P47, P23, P51, P37, P7, P49, P43, P25, P19, P45a, P55, P33, D7, P61	32
2L	473724	A	C	germline_recurrent	P35, P41, P11, P5, D3, P65, P31, P59, D5, P17, P53, P15, P27, P9, P57, D1, P63, P29, P47, P51, P37, P49, P43, P25, P19, P45a, P55, P33, D7, P61	30
2L	473751	C	A	germline_recurrent	P35, P41, P11, P5, D3, P65, P31, D5, P17, P53, P15, P27, P9, P57, D1, P63, P29, P47, P23, P51, P37, P49, P43, P25, P19, P45a, P55, P33, D7, P61	30
2L	474128	T	C	germline_recurrent	P35, P41, P11, P5, D3, P65, P31, P59, D5, P17, P53, P15, P27, P9, P57, D1, P63, P29, P47, P23, P51, P37, P49, P43, P25, P19, P45a, P55, P33, D7, P61	31
2L	474287	A	G	germline_recurrent	P35, P41, P11, D3, P65, P31, P59, D5, P17, P53, P15, P27, P9, P57, D1, P63, P29, P39, P47, P23, P51, P37, P7, P49, P43, P25, P19, P45a, P55, P33, D7, P61	32
2L	474416	A	G	germline_recurrent	P35, P41, P11, D3, P65, P31, P59, D5, P17, P53, P15, P27, P9, P57, D1, P63, P29, P39, P47, P23, P51, P37, P7, P49, P43, P25, P19, P55, P33, D7, P61	31
2L	474683	A	G	germline_recurrent	P35, P41, P11, D3, P65, P31, P59, D5, P53, P15, P27, P9, P57, D1, P63, P29, P39, P47, P23, P51, P37, P7, P49, P43, P25, P19, P45a, P55, P33, D7, P61	31
2L	474776	A	G	germline_recurrent	P35, P41, P11, D3, P65, P31, P59, D5, P17, P53, P15, P27, P9, P57, D1, P63, P29, P47, P51, P37, P7, P49, P43, P25, P19, P45a, P33, D7, P61	29
2L	474824	T	A	germline_recurrent	P35, P41, P11, D3, P65, P31, P59, D5, P17, P53, P15, P27, P9, P57, D1, P63, P29, P37, P7, P49, P43, P19, P33, D7, P61	25
2L	474870	A	T	germline_recurrent	P35, P41, P11, D3, P31, P17, P53, P15, P9, D1, P63, P29, P37, P43, P19, P33, D7	17
2L	474943	T	A	germline_recurrent	P35, P11, D3, P65, P31, P17, P15, P9, D1, P29, P37, P43, P19, P33, D7	15
2L	475106	G	T	germline_recurrent	P35, P41, P11, D3, P65, P31, P59, P17, P53, P15, P27, P9, P57, D1, P63, P29, P47, P23, P37, P7, P49, P43, P19, P45a, P55, P33, D7	27
2L	475195	C	T	germline_recurrent	P35, P41, P11, P5, P65, P31, P59, P17, P53, P15, P27, P9, P57, P63, P29, P47, P23, P51, P37, P7, P49, P43, P19, P45a, P55, P33, P61	27
2L	475206	A	T	germline_recurrent	P35, P41, P11, P5, D3, P65, P31, P59, D5, P17, P53, P15, P27, P9, P57, D1, P63, P29, P47, P23, P51, P37, P7, P49, P43, P19, P45a, P55, P33, D7, P61	31
2L	475238	C	A	germline_recurrent	P35, P41, P11, P5, D3, P65, P31, P59, D5, P17, P53, P15, P27, P9, P57, D1, P63, P29, P47, P23, P51, P37, P7, P49, P43, P19, P45a, P55, P33, D7	30
2L	475256	G	A	germline_recurrent	P35, P41, P11, P5, D3, P65, P31, P59, D5, P17, P53, P15, P27, P9, P57, D1, P63, P29, P39, P47, P23, P51, P37, P7, P49, P43, P19, P45a, P55, P33, D7, P61	32
2L	475299	T	C	germline_recurrent	P35, P41, P11, P5, D3, P65, P31, P59, D5, P17, P53, P15, P27, P9, P57, D1, P63, P29, P39, P47, P23, P51, P37, P7, P49, P43, P25, P19, P45a, P55, P33, D7, P61	33
2L	475500	G	A	germline_recurrent	P35, P41, P11, D3, P65, P31, P59, D5, P53, P15, P27, P9, P57, D1, P63, P29, P39, P47, P23, P51, P37, P7, P49, P43, P25, P19, P45a, P55, P33, D7, P61	31
2L	475533	A	C	germline_recurrent	P35, P41, P11, D3, P65, P31, P59, D5, P53, P15, P27, P9, P57, D1, P63, P29, P39, P47, P23, P51, P37, P7, P49, P43, P25, P19, P55, P33, D7, P61	30
2L	475842	T	C	germline_recurrent	P35, P41, P11, P5, D3, P31, P59, D5, P15, P9, D1, P63, P37, P49, P43, P19, P33, D7	18
2L	476280	A	T	germline_recurrent	P35, P41, P11, P5, D3, P65, P31, P59, D5, P17, P53, P15, P27, P9, P1, P57, D1, P63, P29, P3, P47, P51, P37, P7, P49, P43, P25, P19, P45a, P55, P33, D7, P61	33
2L	476363	C	A	germline_recurrent	P35, P41, P11, P5, D3, P65, P31, P59, D5, P53, P15, P27, P9, P57, D1, P63, P29, P47, P37, P7, P49, P43, P19, P45a, P55, P33, D7, P61	28
2L	476572	G	A	germline_recurrent	P35, P41, P11, D3, P65, P31, P59, P17, P53, P15, P27, P9, P57, D1, P63, P29, P3, P47, P37, P7, P49, P43, P19, P45a, P33, D7, P61	27
2L	476583	T	C	germline_recurrent	P35, P41, P11, D3, P65, P31, P59, P17, P53, P15, P27, P9, P57, D1, P63, P29, P3, P47, P37, P7, P49, P43, P19, P45a, P33, D7, P61	27
2L	476893	T	A	germline_recurrent	P35, P41, P11, P5, D3, P65, P31, P59, D5, P53, P15, P27, P9, P57, D1, P63, P29, P39, P47, P23, P51, P37, P7, P49, P43, P25, P19, P45a, P55, P33, D7, P61	32
2L	476966	A	G	germline_recurrent	P35, P41, P11, P5, D3, P65, P31, P59, D5, P17, P53, P15, P27, P9, P57, D1, P63, P29, P39, P47, P23, P37, P7, P49, P43, P25, P19, P45a, P55, P33, D7, P61	32
2L	476983	C	T	germline_recurrent	P35, P41, P11, P65, P31, P59, P17, P53, P15, P27, P9, P57, P63, P29, P39, P47, P23, P51, P37, P7, P49, P43, P25, P19, P45a, P55, P33, P61	28
2L	477023	G	A	germline_recurrent	P35, P41, P11, P5, D3, P65, P31, P59, D5, P53, P15, P27, P9, P57, D1, P63, P29, P39, P47, P23, P51, P37, P7, P49, P43, P25, P19, P45a, P55, P33, D7, P61	32
2L	477449	G	A	germline_recurrent	P35, P41, P11, D3, P65, P31, P59, D5, P53, P15, P27, P9, P57, D1, P63, P29, P39, P3, P47, P23, P51, P37, P7, P49, P43, P25, P19, P45a, P55, P33, D7, P61	32
2L	477470	G	A	germline_recurrent	P35, P41, P11, D3, P65, P31, P59, D5, P53, P15, P27, P9, P1, P57, D1, P63, P29, P3, P47, P23, P51, P37, P7, P49, P43, P25, P19, P45a, P55, P33, D7, P61	32
2L	477652	T	C	germline_recurrent	P35, P41, P11, P65, P31, P59, P53, P15, P27, P9, P57, P63, P29, P39, P47, P51, P37, P49, P43, P25, P19, P45a, P55, P33, P61	25
2L	477659	C	T	germline_recurrent	P35, P41, P11, D3, P65, P31, P59, D5, P53, P15, P27, P9, P1, P57, D1, P63, P29, P39, P47, P51, P37, P49, P43, P25, P19, P45a, P55, P33, D7, P61	30
2L	477712	T	C	germline_recurrent	P35, P41, P11, P5, D3, P65, P31, P59, D5, P53, P15, P27, P9, P57, D1, P63, P29, P47, P23, P51, P37, P7, P49, P43, P25, P19, P45a, P55, P33, D7, P61	31
2L	477926	A	G	germline_recurrent	P35, P41, P11, D3, P65, P31, D5, P53, P15, P27, P9, P57, D1, P63, P29, P39, P47, P23, P37, P49, P43, P25, P19, P45a, P55, P33, D7, P61	28
2L	477980	C	A	germline_recurrent	P35, P41, P11, D3, P65, P31, P59, D5, P53, P15, P27, P9, P57, D1, P63, P29, P39, P47, P23, P37, P7, P49, P43, P25, P19, P45a, P55, P33, D7, P61	30
2L	478456	T	A	germline_recurrent	P35, P41, P11, P5, D3, P65, P31, P59, P53, P15, P27, P9, P57, D1, P63, P29, P23, P37, P7, P49, P43, P25, P19, P55, P33, D7	26
2L	478480	C	T	germline_recurrent	P35, P41, P11, P5, D3, P65, P31, P59, P17, P53, P15, P27, P9, P57, D1, P63, P29, P39, P23, P51, P37, P7, P49, P43, P25, P19, P55, P33, D7, P61	30
2L	478661	C	T	germline_recurrent	P35, P41, P11, P5, D3, P65, P31, P59, D5, P15, P9, P1, D1, P63, P29, P51, P37, P49, P43, P19, P45a, P33, D7	23
2L	478801	G	A	germline_recurrent	P35, P41, P11, P5, D3, P65, P31, P59, D5, P53, P15, P27, P9, P1, P57, D1, P63, P29, P47, P51, P37, P7, P49, P43, P19, P45a, P55, P33, D7, P61	30
2L	478918	A	T	germline_recurrent	P35, P41, P11, D3, P65, P31, P59, D5, P17, P53, P15, P27, P9, P1, P57, D1, P63, P29, P47, P23, P51, P37, P7, P49, P43, P25, P19, P55, P33, D7, P61	31
2L	479380	T	C	germline_recurrent	P35, P41, P11, D3, P65, P31, P59, D5, P17, P53, P15, P27, P9, P57, D1, P63, P29, P39, P3, P47, P23, P51, P37, P7, P49, P43, P25, P19, P45a, P55, P33, D7, P61	33
2L	480068	C	A	germline_recurrent	P35, P41, P11, P5, D3, P65, P31, P59, D5, P17, P53, P15, P27, P9, P57, D1, P63, P29, P47, P23, P51, P37, P7, P49, P43, P25, P19, P55, P33, D7, P61	31
2L	480121	C	T	germline_recurrent	P35, P41, P11, P5, D3, P65, P31, D5, P17, P53, P15, P27, P9, P57, D1, P63, P29, P39, P47, P23, P51, P37, P49, P43, P25, P19, P55, P33, D7, P61	30
2L	480273	T	G	germline_recurrent	P35, P41, P11, D3, P65, P31, P59, D5, P17, P53, P15, P27, P9, P57, D1, P63, P29, P39, P47, P23, P51, P37, P7, P49, P43, P25, P19, P55, P33, D7	30
2L	480716	T	A	germline_recurrent	P35, P41, P11, D3, P65, P31, P59, D5, P17, P53, P15, P27, P9, P57, D1, P63, P29, P39, P47, P23, P51, P37, P7, P49, P43, P25, P19, P45a, P55, P33, D7, P61	32
2L	480968	G	A	germline_recurrent	P35, P41, P11, D3, P65, P31, P59, D5, P17, P53, P15, P27, P9, P57, D1, P63, P29, P47, P23, P37, P7, P49, P43, P25, P19, P45a, P55, P33, D7, P61	30
2L	480990	G	A	germline_recurrent	P35, P41, P11, D3, P65, P31, P59, D5, P53, P27, P9, P57, D1, P63, P29, P47, P23, P37, P7, P49, P43, P25, P19, P45a, P55, P33, D7, P61	28
2L	481048	A	G	germline_recurrent	P35, P41, P11, P5, D3, P65, P31, D5, P17, P53, P15, P27, P9, P57, D1, P63, P29, P39, P47, P51, P37, P49, P43, P19, P45a, P55, P33, D7, P61	29
2L	481082	A	T	germline_recurrent	P35, P41, P11, P5, D3, P65, P31, P59, D5, P17, P53, P15, P27, P9, P57, D1, P63, P29, P39, P47, P51, P37, P7, P49, P43, P19, P45a, P55, P33, D7, P61	31
2L	481087	A	G	germline_recurrent	P35, P41, P11, P5, D3, P65, P31, P59, D5, P17, P53, P15, P27, P9, P57, D1, P63, P29, P39, P47, P51, P37, P7, P49, P43, P19, P45a, P55, P33, D7, P61	31
2L	481134	C	A	germline_recurrent	P35, P41, P11, P5, D3, P65, P31, P59, D5, P53, P15, P27, P9, P57, D1, P63, P29, P39, P47, P51, P37, P7, P49, P43, P25, P19, P45a, P55, P33, D7, P61	31
2L	481806	A	G	germline_recurrent	P35, P11, D3, P31, D5, P17, P15, P27, P9, D1, P63, P29, P37, P43, P25, P19, P33, D7	18
2L	482074	G	C	germline_recurrent	P35, P41, P11, D3, P31, P17, P15, P9, P1, D1, P29, P37, P7, P43, P33	15
2L	482088	C	T	germline_recurrent	P35, P41, P11, D3, P31, P15, P9, P1, D1, P29, P37, P33	12
2L	482466	A	T	germline_recurrent	P35, P41, P11, P5, D3, P65, P31, P59, D5, P17, P53, P15, P27, P9, P1, P57, D1, P63, P29, P39, P47, P51, P37, P7, P49, P43, P25, P19, P45a, P55, P33, D7, P61	33
2L	482547	A	G	germline_recurrent	P35, P41, P11, D3, P65, P31, P59, D5, P17, P53, P15, P27, P9, P57, D1, P63, P29, P39, P47, P51, P37, P7, P49, P43, P19, P45a, P55, P33, D7, P61	30
2L	482789	T	C	germline_recurrent	P35, P41, P11, P5, D3, P65, P31, P59, P17, P53, P15, P27, P9, P57, D1, P63, P29, P47, P51, P37, P49, P43, P25, P19, P45a, P55, P33, P61	28
2L	482813	A	C	germline_recurrent	P35, P41, P11, P5, D3, P65, P31, P59, P17, P53, P15, P27, P9, P57, D1, P63, P29, P47, P51, P37, P49, P43, P25, P19, P45a, P55, P33, P61	28
2L	482830	A	G	germline_recurrent	P35, P41, P11, P5, D3, P65, P31, P59, P17, P53, P15, P27, P9, P57, D1, P63, P29, P47, P51, P37, P49, P43, P25, P19, P45a, P55, P33, P61	28
2L	482850	T	C	germline_recurrent	P35, P41, P11, P5, D3, P65, P31, P59, D5, P17, P53, P15, P27, P9, P57, D1, P63, P29, P47, P51, P37, P49, P43, P25, P19, P45a, P55, P33, D7, P61	30
2L	482856	A	G	germline_recurrent	P35, P41, P11, P5, D3, P65, P31, P59, P17, P53, P15, P27, P9, P57, D1, P63, P29, P47, P51, P37, P49, P43, P25, P19, P45a, P55, P33, P61	28
2L	482941	A	G	germline_recurrent	P35, P41, P11, P5, D3, P65, P31, P59, P17, P53, P15, P27, P9, P57, D1, P63, P29, P47, P51, P37, P7, P49, P43, P25, P19, P45a, P55, P33, P61	29
2L	482948	G	C	germline_recurrent	P35, P41, P11, P5, D3, P65, P31, P59, P17, P53, P15, P27, P9, P57, D1, P63, P29, P47, P51, P37, P7, P49, P43, P25, P19, P45a, P55, P33, P61	29
2L	482959	A	C	germline_recurrent	P35, P41, P11, P5, D3, P65, P31, P59, P17, P53, P15, P27, P9, P57, D1, P63, P29, P51, P37, P7, P49, P43, P19, P45a, P55, P33, P61	27
2L	482966	C	G	germline_recurrent	P35, P41, P11, D3, P65, P31, P59, P17, P53, P15, P27, P9, P57, D1, P63, P29, P51, P37, P7, P49, P43, P19, P45a, P55, P33	25
2L	482978	T	C	germline_recurrent	P35, P41, P11, P5, P65, P31, P59, P17, P53, P15, P27, P9, P57, P63, P29, P51, P37, P7, P49, P43, P19, P45a, P55, P33	24
2L	483204	A	G	germline_recurrent	P35, P41, P11, P5, P65, P31, P59, P17, P53, P15, P27, P9, P57, P63, P29, P39, P47, P51, P37, P7, P49, P43, P19, P45a, P55, P33, P61	27
2L	483234	T	C	germline_recurrent	P35, P41, P11, P5, P65, P31, P59, P17, P53, P15, P27, P9, P1, P57, P63, P29, P47, P37, P7, P49, P43, P19, P45a, P55, P33, P61	26
2L	483339	G	A	germline_recurrent	P35, P41, P11, P65, P31, P59, P17, P53, P15, P27, P9, P57, P63, P29, P39, P47, P23, P51, P37, P49, P43, P25, P19, P45a, P55, P33, P61	27
2L	483380	C	A	germline_recurrent	P35, P41, P11, P5, D3, P65, P31, P59, D5, P17, P53, P15, P27, P9, P57, D1, P63, P29, P39, P47, P23, P51, P37, P7, P49, P43, P25, P19, P45a, P55, P33, D7, P61	33
2L	483776	T	C	germline_recurrent	P35, P41, P11, P5, D3, P65, P31, P59, D5, P17, P53, P15, P27, P9, P57, D1, P63, P29, P39, P47, P23, P51, P37, P7, P49, P43, P25, P19, P45a, P55, P33, D7, P61	33
2L	483832	G	C	germline_recurrent	P35, P41, P11, P5, P65, P31, P59, P17, P53, P15, P27, P9, P57, P63, P29, P39, P23, P51, P37, P7, P49, P43, P25, P19, P45a, P55, P33, P61	28
2L	483924	C	T	germline_recurrent	P35, P41, P11, P5, D3, P65, P31, P59, D5, P53, P15, P27, P9, P57, D1, P63, P29, P39, P47, P23, P51, P37, P7, P49, P43, P25, P19, P45a, P55, P33, D7, P61	32
2L	483990	A	T	germline_recurrent	P35, P41, P11, P5, D3, P65, P31, P59, D5, P17, P53, P15, P27, P9, P57, D1, P63, P29, P39, P47, P51, P37, P49, P43, P25, P19, P45a, P55, P33, D7, P61	31
2L	484142	C	T	germline_recurrent	P35, P41, P11, P5, D3, P65, P31, P59, D5, P17, P53, P15, P27, P9, P57, D1, P63, P29, P39, P47, P23, P51, P37, P49, P43, P25, P19, P45a, P55, P33, D7, P61	32
2L	484165	C	T	germline_recurrent	P35, P41, P11, P5, D3, P65, P31, P59, D5, P17, P53, P15, P27, P9, P1, P57, D1, P63, P29, P39, P47, P23, P51, P37, P7, P49, P43, P25, P19, P45a, P55, P33, D7, P61	34
2L	484284	T	C	germline_recurrent	P35, P41, P11, P5, D3, P65, P31, P59, D5, P17, P53, P15, P27, P9, P57, D1, P63, P29, P39, P47, P23, P51, P37, P7, P49, P43, P25, P19, P45a, P55, P33, D7, P61	33
2L	484310	A	T	germline_recurrent	P35, P41, P11, P5, D3, P65, P31, P59, D5, P17, P53, P15, P27, P9, P57, D1, P63, P29, P39, P47, P23, P51, P37, P7, P49, P43, P25, P19, P45a, P55, P33, D7, P61	33
2L	484412	C	G	germline_recurrent	P35, P41, P11, P65, P31, P59, P53, P15, P27, P9, P57, P63, P29, P37, P49, P43, P19, P45a, P55, P33, P61	21
2L	484458	G	A	germline_recurrent	P35, P41, P11, P65, P31, P53, P15, P27, P9, P57, P63, P29, P51, P37, P49, P43, P25, P19, P55, P33	20
2L	484625	G	C	germline_recurrent	P35, P41, P11, P65, P31, P59, P17, P53, P15, P27, P9, P57, P63, P29, P47, P51, P37, P7, P49, P43, P25, P19, P45a, P55, P33, P61	26
2L	484661	C	T	germline_recurrent	P35, P41, P11, P65, P31, P59, P17, P53, P15, P27, P9, P57, P63, P29, P47, P23, P51, P37, P49, P43, P25, P19, P45a, P55, P33, P61	26
2L	484690	A	G	germline_recurrent	P35, P41, P11, P65, P31, P59, P53, P15, P27, P9, P57, P63, P29, P23, P51, P37, P49, P43, P25, P19, P45a, P55, P33, P61	24
2L	485089	T	A	germline_recurrent	P35, P41, P11, P65, P31, P59, P17, P53, P15, P27, P9, P57, P63, P29, P47, P23, P37, P7, P49, P43, P25, P19, P45a, P55, P33, P61	26
2L	485176	C	T	germline_recurrent	P35, P41, P11, D3, P65, P31, P59, D5, P17, P53, P15, P27, P9, P57, D1, P63, P29, P47, P23, P51, P37, P7, P49, P43, P25, P19, P45a, P55, P33, D7, P61	31
2L	485182	C	T	germline_recurrent	P35, P41, P11, P5, D3, P65, P31, P59, D5, P17, P53, P15, P27, P9, P57, D1, P63, P29, P47, P23, P51, P37, P7, P49, P43, P25, P19, P45a, P55, P33, D7, P61	32
2L	485221	A	G	germline_recurrent	P35, P41, P11, P5, D3, P65, P31, P59, P17, P53, P15, P27, P9, P57, D1, P63, P29, P47, P23, P51, P37, P7, P49, P43, P25, P19, P45a, P55, P33, D7, P61	31
2L	485234	G	A	germline_recurrent	P35, P41, P11, D3, P65, P31, P59, P17, P53, P15, P27, P9, P57, D1, P63, P29, P47, P23, P51, P37, P7, P49, P43, P25, P19, P45a, P55, P33, D7, P61	30
2L	485315	C	T	germline_recurrent	P35, P41, P11, P5, D3, P65, P31, P59, D5, P17, P53, P15, P27, P9, P57, D1, P63, P29, P47, P51, P37, P7, P49, P43, P25, P19, P45a, P55, P33, D7, P61	31
2L	485558	T	G	germline_recurrent	P35, P41, P11, D3, P65, P31, P59, D5, P53, P15, P27, P9, P57, D1, P63, P29, P39, P47, P23, P51, P37, P49, P43, P25, P19, P45a, P55, P33, D7, P61	30
2L	485575	C	G	germline_recurrent	P35, P41, P11, D3, P65, P31, P59, D5, P53, P15, P27, P9, P57, D1, P63, P29, P39, P47, P23, P51, P37, P49, P43, P25, P19, P45a, P55, P33, D7, P61	30
2L	485964	C	A	germline_recurrent	P35, P41, P11, D3, P65, P31, P59, D5, P17, P53, P15, P27, P9, P57, D1, P63, P29, P23, P51, P37, P7, P49, P43, P25, P19, P45a, P55, P33, D7, P61	30
2L	486046	G	C	germline_recurrent	P35, P41, P11, D3, P65, P31, P59, P53, P15, P27, P9, P57, D1, P63, P29, P39, P23, P51, P37, P49, P43, P25, P19, P45a, P55, P33, D7, P61	28
2L	486084	G	A	germline_recurrent	P35, P41, P11, D3, P65, P31, P59, P53, P15, P27, P9, P57, D1, P63, P29, P39, P23, P51, P37, P7, P49, P43, P25, P19, P45a, P55, P33, P61	28
2L	486094	T	C	germline_recurrent	P35, P41, P11, D3, P65, P31, P59, P53, P15, P27, P9, P57, D1, P63, P29, P39, P23, P51, P37, P7, P49, P43, P25, P19, P45a, P55, P33, D7, P61	29
2L	486135	C	T	germline_recurrent	P35, P41, P11, D3, P65, P31, P59, P17, P53, P15, P27, P9, P57, D1, P63, P29, P39, P47, P23, P51, P37, P7, P49, P43, P25, P19, P55, P33, P61	29
2L	486224	C	T	germline_recurrent	P35, P41, P11, P65, P31, P59, P17, P53, P15, P27, P9, P57, P63, P29, P39, P47, P37, P7, P49, P43, P25, P19, P45a, P55, P33, P61	26
2L	486544	A	G	germline_recurrent	P35, P41, P11, D3, P65, P31, P59, P53, P15, P27, P9, P57, D1, P63, P29, P39, P47, P51, P37, P49, P43, P25, P19, P45a, P55, P33, P61	27
2L	486594	T	G	germline_recurrent	P35, P41, P11, P5, D3, P65, P59, D5, P53, P15, P27, P9, P57, D1, P63, P29, P47, P23, P37, P49, P43, P19, P55, P33, D7	25
2L	486616	C	T	germline_recurrent	P35, P41, P11, D3, P59, P53, P15, P27, P9, D1, P63, P23, P37, P49, P43, P19, P33	17
2L	486632	A	T	germline_recurrent	P35, P41, P11, P5, D3, P31, P59, D5, P53, P15, P27, P9, P57, D1, P63, P29, P23, P37, P49, P43, P25, P19, P55, P33, D7	25
2L	486752	G	A	germline_recurrent	P35, P41, P11, P5, D3, P65, P31, P59, D5, P53, P15, P27, P9, P57, D1, P63, P29, P39, P47, P23, P51, P37, P49, P43, P25, P19, P45a, P55, P33, D7, P61	31
2L	486783	T	C	germline_recurrent	P35, P41, P11, D3, P65, P31, P59, P53, P15, P27, P9, P57, D1, P63, P29, P39, P47, P23, P51, P37, P49, P43, P25, P19, P55, P33, P61	27
2L	486803	C	T	germline_recurrent	P35, P41, P11, D3, P65, P31, P59, D5, P53, P15, P27, P9, P57, D1, P63, P29, P39, P47, P23, P51, P37, P49, P43, P25, P19, P45a, P55, P33, D7, P61	30
2L	486931	T	C	germline_recurrent	P35, P41, P11, D3, P65, P31, P59, D5, P53, P15, P27, P9, P57, D1, P63, P29, P47, P51, P37, P49, P43, P25, P19, P45a, P55, P33, D7, P61	28
2L	486955	C	T	germline_recurrent	P35, P41, P11, D3, P65, P31, P59, D5, P53, P15, P27, P9, P57, D1, P63, P29, P23, P51, P37, P49, P43, P25, P19, P45a, P55, P33, D7, P61	28
2L	486961	C	G	germline_recurrent	P35, P41, P11, D3, P65, P31, P59, D5, P53, P15, P27, P9, P57, D1, P63, P29, P23, P51, P37, P49, P43, P25, P19, P45a, P55, P33, D7, P61	28
2L	486980	T	C	germline_recurrent	P35, P41, P11, D3, P65, P31, P59, D5, P53, P15, P27, P9, P57, D1, P63, P29, P39, P23, P51, P37, P49, P43, P25, P19, P45a, P55, P33, D7, P61	29
2L	486985	G	A	germline_recurrent	P35, P41, P11, D3, P65, P31, P59, D5, P53, P15, P27, P9, P57, D1, P63, P29, P39, P47, P23, P51, P37, P49, P43, P25, P19, P45a, P55, P33, D7, P61	30
2L	487008	G	C	germline_recurrent	P35, P41, P11, P5, D3, P65, P31, P59, D5, P53, P15, P27, P9, P57, D1, P63, P29, P39, P23, P37, P49, P43, P25, P19, P45a, P55, P33, D7, P61	29
2L	487048	A	C	germline_recurrent	P35, P41, P11, P5, D3, P31, P59, D5, P17, P53, P15, P27, P9, P57, D1, P63, P29, P39, P47, P23, P51, P37, P49, P43, P25, P19, P45a, P55, P33, D7	30
2L	487104	C	A	germline_recurrent	P35, P41, P11, D3, P65, P31, P59, P53, P15, P27, P9, P57, D1, P63, P29, P47, P51, P37, P49, P43, P19, P45a, P55, P33, P61	25
2L	487123	C	T	germline_recurrent	P35, P41, P11, P5, D3, P65, P31, P59, D5, P17, P53, P15, P27, P9, P57, D1, P63, P29, P39, P47, P51, P37, P49, P43, P25, P19, P45a, P55, P33, D7, P61	31
2L	487257	C	A	germline_recurrent	P35, P41, P11, D3, P65, P31, P59, D5, P53, P15, P27, P9, P57, D1, P63, P29, P23, P51, P37, P7, P49, P43, P25, P19, P45a, P55, P33, D7, P61	29
2L	487317	A	C	germline_recurrent	P35, P41, P11, D3, P65, P31, P59, D5, P53, P15, P27, P9, P57, D1, P63, P29, P47, P23, P51, P37, P7, P49, P43, P25, P19, P45a, P55, P33, D7, P61	30
2L	487466	C	G	germline_recurrent	P35, P41, P11, P5, D3, P65, P31, P59, D5, P53, P15, P27, P9, P57, D1, P63, P29, P47, P23, P51, P37, P7, P49, P43, P25, P19, P45a, P55, P33, D7, P61	31
2L	487472	T	C	germline_recurrent	P35, P41, P11, P5, D3, P65, P31, P59, D5, P53, P15, P27, P9, P57, D1, P63, P29, P47, P23, P51, P37, P7, P49, P43, P25, P19, P45a, P55, P33, D7, P61	31
2L	487477	A	G	germline_recurrent	P35, P41, P11, P5, D3, P65, P31, P59, D5, P53, P15, P27, P9, P57, D1, P63, P29, P47, P23, P51, P37, P7, P49, P43, P25, P19, P45a, P55, P33, D7, P61	31
2L	487543	C	T	germline_recurrent	P35, P41, P11, D3, P65, P31, P59, D5, P17, P53, P15, P27, P9, P57, D1, P63, P29, P39, P47, P23, P51, P37, P7, P49, P43, P25, P19, P45a, P55, P33, D7, P61	32
2L	487557	C	T	germline_recurrent	P35, P41, P11, D3, P65, P31, P59, D5, P17, P53, P15, P27, P9, P57, D1, P63, P29, P39, P47, P23, P51, P37, P7, P49, P43, P25, P19, P45a, P55, P33, D7, P61	32
2L	487583	T	G	germline_recurrent	P35, P41, P11, D3, P65, P31, P59, D5, P17, P53, P15, P27, P9, P57, D1, P63, P29, P39, P47, P51, P37, P7, P49, P43, P25, P19, P45a, P55, P33, D7, P61	31
2L	487637	T	A	germline_recurrent	P35, P41, P11, P5, D3, P65, P31, P59, P53, P15, P27, P9, P57, D1, P63, P29, P39, P47, P51, P37, P49, P43, P19, P45a, P33, D7, P61	27
2L	487663	T	A	germline_recurrent	P35, P41, P11, P65, P31, P59, P53, P15, P27, P9, P57, P63, P29, P47, P51, P37, P49, P43, P19, P45a, P33, P61	22
2L	487762	G	A	germline_recurrent	P35, P41, P11, P5, D3, P31, D5, P17, P53, P15, P27, P9, P57, D1, P63, P29, P47, P23, P37, P7, P49, P43, P25, P19, P55, P33, D7, P61	28
2L	487892	C	G	germline_recurrent	P35, P41, P11, D3, P65, P31, P59, P17, P53, P15, P27, P9, P57, D1, P63, P29, P51, P37, P49, P43, P25, P19, P45a, P55, P33, P61	26
2L	488212	G	T	germline_recurrent	P35, P41, P11, D3, P65, P31, P59, D5, P17, P53, P15, P27, P9, P57, D1, P63, P29, P47, P51, P37, P49, P43, P19, P45a, P55, P33, D7, P61	28
2L	488234	A	T	germline_recurrent	P35, P41, P11, D3, P65, P31, P59, D5, P17, P53, P15, P27, P9, P57, D1, P63, P29, P47, P23, P51, P37, P49, P43, P25, P19, P45a, P55, P33, D7, P61	30
2L	488367	G	C	germline_recurrent	P35, P41, P11, P5, D3, P65, P31, P59, D5, P17, P53, P15, P27, P9, P57, D1, P63, P29, P39, P3, P47, P23, P51, P37, P7, P49, P43, P25, P19, P55, P33, D7, P61	33
2L	488639	C	A	germline_recurrent	P35, P41, P11, P65, P31, P59, D5, P17, P53, P15, P27, P9, P57, P63, P29, P47, P23, P51, P37, P7, P49, P43, P25, P19, P45a, P55, P33, D7, P61	29
2L	488850	T	C	germline_recurrent	P35, P41, P11, P5, D3, P65, P31, P59, D5, P17, P53, P15, P27, P9, P57, D1, P63, P29, P47, P23, P51, P37, P7, P49, P43, P25, P19, P45a, P55, P33, D7, P61	32
2L	489107	T	A	germline_recurrent	P35, P41, P11, P5, D3, P65, P31, P59, D5, P17, P53, P15, P27, P9, P57, D1, P63, P29, P47, P23, P51, P37, P7, P49, P43, P25, P19, P45a, P55, P33, D7, P61	32
2L	489249	T	C	germline_recurrent	P35, P41, P11, P5, D3, P65, P31, P59, D5, P17, P53, P15, P27, P9, P57, D1, P63, P29, P39, P47, P23, P51, P37, P49, P43, P25, P19, P45a, P55, P33, D7, P61	32
2L	489376	C	T	germline_recurrent	P35, P41, P11, D3, P65, P31, P59, P17, P53, P15, P27, P9, P57, D1, P63, P29, P39, P47, P23, P51, P37, P7, P49, P43, P25, P19, P45a, P55, P33, P61	30
2L	489395	C	T	germline_recurrent	P35, P41, P11, P65, P31, P59, P17, P53, P15, P27, P9, P57, P63, P29, P39, P47, P23, P51, P37, P7, P49, P43, P25, P19, P45a, P55, P33, P61	28
2L	489500	C	T	germline_recurrent	P35, P41, P11, P5, D3, P65, P31, P59, D5, P53, P15, P27, P9, P57, D1, P63, P29, P39, P47, P23, P51, P37, P7, P49, P43, P25, P19, P45a, P55, P33, D7, P61	32
2L	489552	G	T	germline_recurrent	P35, P41, P11, P65, P31, P59, P17, P53, P15, P27, P9, P1, P57, P63, P29, P39, P47, P23, P51, P37, P7, P49, P43, P25, P19, P45a, P55, P33, P61	29
2L	489733	C	A	germline_recurrent	P35, P41, P11, P65, P31, P59, P17, P53, P15, P27, P9, P57, P63, P29, P39, P47, P23, P51, P37, P7, P49, P43, P25, P19, P45a, P55, P33, P61	28
2L	489741	G	T	germline_recurrent	P35, P41, P11, D3, P65, P31, P59, D5, P17, P53, P15, P27, P9, P57, D1, P63, P29, P39, P47, P23, P51, P37, P49, P43, P25, P19, P45a, P55, P33, D7, P61	31
2L	489762	G	C	germline_recurrent	P35, P41, P11, P65, P31, P59, P17, P53, P15, P27, P9, P57, P63, P29, P39, P47, P23, P51, P37, P49, P43, P25, P19, P45a, P55, P33, P61	27
2L	489781	T	C	germline_recurrent	P35, P41, P11, P65, P31, P59, P17, P53, P15, P27, P9, P57, P63, P29, P39, P47, P51, P37, P49, P43, P25, P19, P45a, P55, P33, P61	26
2L	489853	C	T	germline_recurrent	P35, P41, P11, P5, D3, P65, P31, D5, P17, P53, P15, P27, P9, P57, D1, P63, P29, P37, P7, P49, P43, P25, P19, P55, P33, D7	26
2L	489877	A	G	germline_recurrent	P35, P41, P11, P5, D3, P65, P31, D5, P17, P53, P15, P27, P9, P57, D1, P63, P37, P7, P49, P43, P25, P19, P45a, P55, P33, D7	26
2L	490087	C	G	germline_recurrent	P35, P41, P11, P5, P65, P31, P59, D5, P17, P53, P15, P27, P9, P57, P63, P29, P3, P23, P51, P37, P7, P49, P43, P25, P19, P45a, P55, P33, D7, P61	30
2L	490182	C	T	germline_recurrent	P35, P41, P11, P5, P65, P31, P59, D5, P53, P15, P27, P9, P57, P63, P29, P39, P51, P37, P7, P49, P43, P25, P19, P45a, P55, P33, D7, P61	28
2L	490347	G	T	germline_recurrent	P35, P41, P11, P65, P31, P59, P53, P15, P27, P9, P57, P63, P29, P39, P3, P51, P37, P49, P43, P25, P19, P45a, P55, P33, P61	25
2L	490358	T	A	germline_recurrent	P35, P41, P11, P65, P31, P59, P53, P15, P27, P9, P57, P63, P29, P39, P3, P51, P37, P49, P43, P25, P19, P45a, P55, P33, P61	25
2L	490406	C	G	germline_recurrent	P35, P41, P11, P65, P31, P59, P53, P15, P27, P9, P1, P57, P63, P29, P39, P3, P51, P37, P49, P43, P25, P19, P45a, P55, P33, P61	26
2L	490442	C	T	germline_recurrent	P35, P41, P11, P53, P15, P27, P57, P63, P29, P37, P25	11
2L	490581	T	G	germline_recurrent	P35, P41, P11, P5, D3, P65, P31, P59, D5, P53, P15, P27, P9, P57, D1, P63, P29, P39, P23, P51, P37, P49, P43, P19, P55, P33, D7	27
2L	490653	G	A	germline_recurrent	P35, P41, P11, P65, P31, P59, P17, P53, P15, P27, P9, P57, P63, P29, P39, P47, P23, P51, P37, P49, P43, P25, P19, P45a, P55, P33, P61	27
2L	490770	T	C	germline_recurrent	P35, P41, P11, P65, P31, D5, P17, P53, P15, P27, P9, P57, P63, P39, P3, P23, P51, P37, P19, P45a, P55, P33, D7	23
2L	490936	T	C	germline_recurrent	P35, P41, P11, P65, P31, P59, P17, P53, P15, P27, P9, P57, P63, P29, P39, P47, P51, P37, P49, P43, P25, P19, P45a, P55, P33, P61	26
2L	490939	A	T	germline_recurrent	P35, P41, P11, P5, D3, P65, P31, P59, D5, P17, P53, P15, P27, P9, P57, D1, P63, P29, P39, P47, P51, P37, P49, P43, P25, P19, P45a, P55, P33, D7, P61	31
2L	490987	G	T	germline_recurrent	P35, P41, P11, P5, D3, P65, P31, P59, D5, P17, P53, P15, P27, P9, P57, D1, P63, P29, P39, P47, P23, P51, P37, P7, P49, P43, P25, P19, P45a, P55, P33, D7, P61	33
2L	490995	A	T	germline_recurrent	P35, P41, P11, P5, D3, P65, P31, P59, D5, P17, P53, P15, P27, P9, P57, D1, P63, P29, P39, P47, P23, P51, P37, P7, P49, P43, P25, P19, P45a, P55, P33, D7, P61	33
2L	491097	G	A	germline_recurrent	P35, P41, P11, P5, D3, P65, P31, P59, D5, P17, P53, P15, P27, P9, P1, P57, D1, P63, P29, P39, P47, P23, P51, P37, P7, P49, P43, P25, P19, P45a, P55, P33, D7, P61	34
2L	491270	C	T	germline_recurrent	P35, P41, P11, P65, P31, P59, P17, P53, P15, P27, P9, P57, P63, P29, P39, P47, P23, P51, P37, P49, P43, P25, P19, P45a, P55, P33, P61	27
2L	491364	C	T	germline_recurrent	P35, P41, P11, P5, D3, P65, P31, P59, D5, P17, P53, P15, P27, P9, P57, D1, P63, P29, P47, P23, P51, P37, P7, P49, P43, P25, P19, P45a, P55, P33, D7, P61	32
2L	491408	C	A	germline_recurrent	P35, P41, P11, P5, P65, P31, P59, P17, P53, P15, P27, P9, P57, P63, P29, P39, P47, P23, P51, P37, P7, P49, P43, P25, P19, P45a, P55, P33, P61	29
2L	491569	C	T	germline_recurrent	P35, P41, P11, P5, D3, P65, P31, P59, D5, P17, P53, P15, P27, P9, P1, P57, D1, P63, P29, P39, P3, P47, P23, P51, P37, P7, P49, P43, P25, P19, P45a, P55, P33, D7, P61	35
2L	491714	T	G	germline_recurrent	P35, P41, P11, P5, D3, P65, P31, P59, D5, P17, P53, P15, P27, P9, P57, D1, P63, P29, P39, P47, P23, P51, P37, P7, P49, P43, P25, P19, P45a, P55, P33, D7, P61	33
2L	491740	C	A	germline_recurrent	P35, P41, P11, P5, P65, P31, P59, P53, P15, P27, P9, P57, P63, P29, P39, P47, P23, P51, P37, P7, P49, P43, P25, P19, P45a, P55, P33, P61	28
2L	491777	T	C	germline_recurrent	P35, P41, P11, P5, D3, P65, P31, P59, D5, P17, P53, P15, P27, P9, P57, D1, P63, P29, P39, P47, P23, P51, P37, P7, P49, P43, P25, P19, P45a, P55, P33, D7, P61	33
2L	491824	G	T	germline_recurrent	P35, P41, P11, P5, D3, P65, P31, P59, D5, P17, P53, P15, P27, P9, P57, D1, P63, P29, P47, P51, P37, P49, P43, P25, P19, P45a, P55, P33, D7, P61	30
2L	491883	T	A	germline_recurrent	P35, P41, P11, P5, D3, P65, P31, P59, D5, P17, P53, P15, P27, P9, P57, D1, P63, P29, P39, P3, P47, P23, P51, P37, P49, P43, P25, P19, P45a, P55, P33, D7, P61	33
2L	492217	C	T	germline_recurrent	P35, P41, P11, D3, P65, P31, P59, D5, P53, P15, P27, P9, P57, D1, P63, P29, P47, P23, P37, P49, P43, P25, P19, P45a, P55, P33, D7, P61	28
2L	492231	A	C	germline_recurrent	P35, P41, P11, D3, P65, P31, P59, D5, P53, P15, P27, P9, P57, D1, P63, P29, P47, P23, P37, P49, P43, P25, P19, P45a, P55, P33, D7, P61	28
2L	492267	T	C	germline_recurrent	P35, P41, P11, D3, P65, P31, P59, D5, P53, P15, P27, P9, P57, D1, P63, P29, P39, P47, P23, P51, P37, P7, P49, P43, P25, P19, P45a, P55, P33, D7	30
2L	492331	A	T	germline_recurrent	P35, P41, P11, P5, P65, P31, P59, D5, P17, P53, P15, P27, P9, P57, P63, P29, P39, P47, P51, P37, P7, P49, P43, P25, P19, P45a, P55, P33, D7	29
2L	492383	C	T	germline_recurrent	P35, P41, P11, P5, D3, P65, P31, P59, P17, P53, P15, P27, P9, P57, D1, P63, P29, P39, P47, P51, P37, P7, P49, P43, P25, P19, P45a, P55, P33, D7, P61	31
2L	492810	C	T	germline_recurrent	P35, P41, P11, P5, P31, P15, P9, D1, P29, P3, P37, P43, P33	13
2L	492829	C	G	germline_recurrent	P35, P41, P11, P5, P31, P59, P15, P9, D1, P29, P3, P37, P43, P33	14
2L	492977	T	A	germline_recurrent	P35, P41, P11, P31, P17, P53, P15, P9, P63, P29, P37, P7, P49, P43, P33	15
2L	493248	A	G	germline_recurrent	P35, P41, P11, P65, P31, P59, P17, P53, P15, P27, P9, P57, P63, P29, P47, P51, P37, P7, P49, P43, P25, P19, P45a, P55, P33	25
2L	493393	G	A	germline_recurrent	P35, P41, P11, P5, D3, P65, P31, P59, D5, P17, P53, P15, P27, P9, P57, D1, P63, P29, P23, P37, P49, P43, P19, P55, P33, D7	26
2L	493408	G	T	germline_recurrent	P35, P41, P11, D3, P65, P31, P59, D5, P17, P53, P15, P27, P9, D1, P63, P37, P49, P43, P19, P55, P33, D7	22
2L	493448	A	T	germline_recurrent	P35, P41, P11, D3, P31, P59, P17, P53, P15, P27, D1, P29, P37, P49, P43, P33, D7	17
2L	493550	G	A	germline_recurrent	P35, P41, P11, P5, D3, P65, P31, P17, P15, P27, P9, P57, D1, P63, P29, P47, P51, P37, P7, P49, P43, P19, P33, D7	24
2L	493701	T	G	germline_recurrent	P35, P41, P11, P5, D3, P65, P31, P59, D5, P53, P15, P27, P9, D1, P63, P29, P47, P37, P49, P43, P19, P33, D7	23
2L	493790	G	T	germline_recurrent	P35, P41, P11, P5, D3, P65, P31, P59, D5, P15, P27, P9, D1, P63, P29, P3, P47, P51, P37, P49, P43, P19, P33, D7	24
2L	493873	C	A	germline_recurrent	P35, P11, P5, D3, P31, D5, P15, P9, D1, P29, P37, P19, P33, D7	14
2L	493917	A	G	germline_recurrent	P35, P41, P11, P5, D3, P65, P31, D5, P53, P15, P27, P9, P57, D1, P63, P29, P47, P37, P49, P43, P19, P45a, P55, P33, D7, P61	26
2L	494100	A	G	germline_recurrent	P35, P41, P11, D3, P65, P31, P59, D5, P53, P15, P27, P9, P57, D1, P63, P29, P47, P23, P37, P7, P49, P43, P25, P19, P45a, P55, P33, D7, P61	29
2L	494156	T	G	germline_recurrent	P35, P41, P11, P31, P59, P53, P15, P27, P9, P57, P63, P29, P47, P37, P7, P49, P43, P25, P19, P55, P33, P61	22
2L	494184	T	C	germline_recurrent	P35, P41, P11, D3, P65, P31, P59, P53, P15, P27, P9, P57, D1, P63, P29, P39, P47, P37, P7, P49, P43, P25, P19, P55, P33, P61	26
2L	495162	T	C	germline_recurrent	P35, P41, P11, P5, D3, P65, P31, P59, P17, P53, P15, P27, P9, P57, D1, P63, P29, P3, P47, P51, P37, P7, P49, P43, P19, P45a, P55, P33, D7	29
2L	495220	A	C	germline_recurrent	P35, P41, P11, D3, P65, P31, P59, D5, P17, P53, P15, P27, P9, P57, D1, P63, P29, P3, P47, P51, P37, P49, P43, P19, P45a, P55, P33, D7	28
2L	495253	T	A	germline_recurrent	P35, P41, P11, P5, D3, P65, P31, P59, D5, P17, P53, P15, P27, P9, P57, D1, P63, P29, P39, P3, P47, P23, P51, P37, P7, P49, P43, P25, P45a, P55, P33, D7, P61	33
2L	495437	A	G	germline_recurrent	P35, P41, P11, P65, P31, P59, P53, P15, P27, P9, P57, P63, P29, P39, P47, P23, P51, P37, P7, P49, P43, P25, P19, P55, P33, P61	26
2L	495458	C	T	germline_recurrent	P35, P41, P11, P5, D3, P65, P31, P59, D5, P53, P15, P27, P9, P57, D1, P63, P29, P39, P47, P51, P37, P7, P49, P43, P25, P19, P45a, P55, P33, D7, P61	31
2L	495512	G	T	germline_recurrent	P35, P41, P11, P5, D3, P65, P31, P59, D5, P53, P15, P27, P9, P1, P57, D1, P63, P29, P39, P3, P47, P23, P51, P37, P7, P49, P43, P25, P19, P45a, P55, P33, D7, P61	34
2L	495580	G	A	germline_recurrent	P35, P41, P11, D3, P65, P31, P59, D5, P17, P53, P15, P27, P9, P1, P57, D1, P63, P29, P39, P3, P47, P23, P51, P37, P7, P49, P43, P25, P19, P45a, P55, P33, D7, P61	34
2L	495599	C	T	germline_recurrent	P35, P41, P11, D3, P65, P31, P59, D5, P17, P53, P15, P27, P9, P57, D1, P63, P29, P39, P3, P47, P23, P51, P37, P7, P49, P43, P25, P19, P45a, P55, P33, D7, P61	33
2L	495614	C	T	germline_recurrent	P35, P41, P11, D3, P65, P31, P59, D5, P17, P53, P15, P27, P9, P57, D1, P63, P29, P39, P47, P23, P51, P37, P7, P49, P43, P25, P19, P45a, P55, P33, D7, P61	32
2L	495810	C	G	germline_recurrent	P35, P41, P11, P5, D3, P65, P31, P59, D5, P17, P53, P15, P27, P9, P57, D1, P63, P29, P39, P3, P47, P23, P51, P37, P7, P49, P43, P25, P19, P45a, P55, P33, D7, P61	34
2L	495979	T	C	germline_recurrent	P35, P41, P11, P5, D3, P65, P31, P59, D5, P17, P53, P15, P27, P9, P57, D1, P63, P29, P39, P47, P23, P51, P37, P7, P49, P43, P25, P19, P45a, P55, P33, D7, P61	33
2L	496446	A	T	germline_recurrent	P35, P41, P11, P5, D3, P65, P31, P59, D5, P53, P15, P27, P9, P1, P57, D1, P63, P29, P47, P23, P37, P49, P43, P19, P45a, P55, P33, D7	28
2L	496505	A	G	germline_recurrent	P35, P41, P11, P5, D3, P65, P31, P59, D5, P17, P53, P15, P27, P9, P57, D1, P63, P29, P47, P23, P51, P37, P49, P43, P25, P19, P45a, P55, P33, D7, P61	31
2L	497125	C	T	germline_recurrent	P35, P41, P11, P5, P65, P31, P59, P17, P53, P15, P27, P9, P57, P63, P29, P39, P47, P23, P51, P37, P49, P43, P25, P19, P45a, P55, P33, P61	28
2L	497421	T	A	germline_recurrent	P35, P41, P11, D3, P65, P31, P59, D5, P53, P15, P27, P9, P57, D1, P63, P29, P47, P37, P49, P43, P25, P19, P45a, P55, P33, D7	26
2L	497432	T	A	germline_recurrent	P35, P41, P11, D3, P65, P31, P59, D5, P17, P53, P15, P27, P9, P57, D1, P63, P29, P47, P37, P7, P49, P43, P25, P19, P45a, P55, P33, D7, P61	29
2L	497447	T	A	germline_recurrent	P35, P41, P11, D3, P65, P31, P59, P53, P15, P27, P9, P57, D1, P63, P29, P47, P37, P7, P49, P43, P19, P45a, P55, P33, D7	25
2L	497511	T	C	germline_recurrent	P35, P41, P11, D3, P65, P31, P53, P15, P27, P9, D1, P63, P29, P47, P37, P49, P43, P19, P45a, P55, P33, D7	22
2L	497537	C	T	germline_recurrent	P35, P41, P11, D3, P31, P27, P9, P57, P29, P47, P37, P49, P43, P45a, P33, D7, P61	17
2L	497560	C	T	germline_recurrent	P35, P41, P11, D3, P65, P31, P53, P15, P27, P9, P57, D1, P63, P29, P47, P23, P37, P49, P43, P19, P45a, P55, P33, D7, P61	25
2L	497587	C	T	germline_recurrent	P35, P41, P11, P65, P31, P59, P17, P53, P15, P27, P9, P57, P63, P29, P39, P47, P23, P51, P37, P7, P49, P43, P19, P45a, P55, P33, P61	27
2L	497597	C	T	germline_recurrent	P35, P41, P11, D3, P65, P31, P59, P17, P53, P15, P27, P9, P57, D1, P63, P29, P47, P23, P37, P7, P49, P43, P19, P55, P33, D7, P61	27
2L	497766	T	C	germline_recurrent	P35, P41, P11, D3, P65, P31, P59, D5, P17, P53, P15, P27, P9, P57, D1, P63, P29, P39, P47, P23, P51, P37, P7, P49, P43, P25, P19, P45a, P55, P33, D7, P61	32
2L	497942	A	G	germline_recurrent	P35, P41, P11, P65, P31, P59, P17, P53, P15, P27, P9, P57, P63, P29, P39, P47, P23, P51, P37, P49, P43, P25, P19, P45a, P55, P33, P61	27
2L	498036	T	C	germline_recurrent	P35, P41, P11, P5, P65, P31, P59, P17, P53, P15, P27, P9, P57, P63, P29, P39, P47, P23, P51, P37, P7, P49, P43, P25, P19, P45a, P55, P33, P61	29
2L	498122	C	T	germline_recurrent	P35, P41, P11, P65, P31, P59, P53, P15, P27, P9, P57, P63, P29, P39, P47, P23, P51, P37, P7, P49, P43, P25, P19, P45a, P55, P33, P61	27
2L	498252	C	T	germline_recurrent	P35, P41, P11, D3, P65, P31, P59, D5, P17, P53, P15, P27, P9, P1, P57, D1, P63, P29, P39, P47, P23, P51, P37, P49, P43, P25, P19, P45a, P55, P33, D7, P61	32
2L	498259	A	G	germline_recurrent	P35, P41, P11, D3, P65, P31, P59, D5, P17, P53, P15, P27, P9, P1, P57, D1, P63, P29, P39, P47, P23, P51, P37, P49, P43, P25, P19, P45a, P55, P33, D7, P61	32
2L	498266	T	A	germline_recurrent	P35, P41, P11, P5, D3, P65, P31, P59, D5, P17, P53, P15, P27, P9, P1, P57, D1, P63, P29, P47, P51, P37, P49, P43, P25, P19, P45a, P55, P33, D7, P61	31
2L	498604	C	T	germline_recurrent	P35, P41, P11, P5, D3, P65, P31, P59, P17, P53, P15, P27, P9, P57, D1, P63, P29, P39, P3, P47, P37, P7, P49, P43, P19, P55, P33, P61	28
2L	498822	T	G	germline_recurrent	P35, P41, P11, P5, D3, P65, P31, P59, D5, P17, P53, P15, P27, P9, P57, D1, P63, P29, P47, P51, P37, P49, P43, P25, P19, P45a, P55, P33, D7, P61	30
2L	498839	C	T	germline_recurrent	P35, P41, P11, P5, D3, P65, P31, P59, P17, P53, P15, P27, P9, P57, D1, P63, P29, P47, P23, P37, P7, P49, P43, P25, P19, P45a, P55, P33, P61	29
2L	498864	G	A	germline_recurrent	P35, P41, P11, P5, D3, P65, P31, P59, D5, P17, P53, P15, P27, P9, P57, D1, P63, P29, P47, P23, P51, P37, P7, P49, P43, P25, P19, P45a, P55, P33, D7, P61	32
2L	499232	C	A	germline_recurrent	P35, P41, P11, D3, P65, P31, P59, D5, P53, P15, P27, P9, P57, D1, P63, P29, P39, P3, P47, P23, P51, P37, P7, P49, P43, P25, P19, P45a, P55, P33, D7, P61	32
2L	499276	A	G	germline_recurrent	P35, P41, P11, D3, P65, P31, P59, D5, P17, P53, P15, P27, P9, P57, D1, P63, P29, P39, P3, P47, P23, P51, P37, P7, P49, P43, P25, P19, P45a, P55, P33, D7, P61	33
2L	499660	A	T	germline_recurrent	P35, P41, P11, D3, P65, P31, P59, P53, P15, P27, P9, P57, D1, P63, P29, P47, P51, P37, P7, P49, P43, P19, P45a, P33, D7	25
2L	499753	A	G	germline_recurrent	P35, P41, P11, D3, P65, P31, P59, P17, P53, P15, P27, P9, P57, D1, P63, P29, P39, P47, P51, P37, P7, P49, P43, P19, P45a, P55, P33, D7	28
2L	499771	A	G	germline_recurrent	P35, P41, P11, D3, P65, P31, P59, P17, P53, P15, P27, P9, P57, D1, P63, P29, P39, P47, P51, P37, P49, P43, P25, P19, P45a, P55, P33, D7, P61	29
2L	500496	C	T	germline_recurrent	P35, P41, P11, P5, D3, P65, P31, P59, D5, P53, P15, P27, P9, P57, D1, P63, P29, P47, P37, P7, P49, P43, P19, P45a, P55, P33, D7	27
2L	500744	A	C	germline_recurrent	P35, P41, P11, P65, P31, P59, P53, P15, P27, P9, P57, P63, P29, P47, P23, P37, P49, P43, P19, P45a, P55, P33	22
2L	500779	A	C	germline_recurrent	P35, P41, P11, D3, P65, P31, P59, P53, P15, P27, P9, P57, D1, P63, P29, P37, P49, P43, P19, P45a, P55, P33, D7	23
2L	500788	C	T	germline_recurrent	P35, P41, P11, P65, P31, P59, P53, P15, P27, P9, P57, P63, P29, P37, P7, P49, P43, P19, P45a, P55, P33	21
2L	500850	T	G	germline_recurrent	P35, P41, P11, D3, P65, P31, P59, D5, P53, P15, P27, P9, P57, D1, P63, P29, P47, P51, P37, P49, P43, P19, P45a, P33, D7	25
2L	500906	A	G	germline_recurrent	P35, P41, P11, D3, P65, P31, P59, P53, P15, P27, P9, P57, D1, P63, P29, P47, P23, P51, P37, P7, P49, P43, P19, P45a, P55, P33, P61	27
2L	500922	T	C	germline_recurrent	P35, P41, P11, D3, P65, P31, P59, D5, P53, P15, P27, P9, P57, D1, P63, P29, P47, P51, P37, P7, P49, P43, P19, P45a, P55, P33, D7, P61	28
2L	500944	C	T	germline_recurrent	P35, P41, P11, P5, D3, P65, P31, P59, P53, P15, P27, P9, P57, D1, P63, P29, P39, P47, P23, P51, P37, P7, P49, P43, P19, P45a, P55, P33, P61	29
2L	501040	T	G	germline_recurrent	P35, P41, P11, P5, D3, P65, P31, P59, D5, P53, P15, P27, P9, P57, D1, P63, P29, P3, P47, P23, P37, P7, P49, P43, P25, P19, P45a, P55, P33, D7, P61	31
2L	501279	G	A	germline_recurrent	P35, P41, P11, P5, D3, P65, P31, P59, D5, P53, P15, P27, P9, P57, D1, P63, P29, P47, P51, P37, P7, P49, P43, P19, P45a, P55, P33, D7	28
2L	501408	G	A	germline_recurrent	P35, P41, P11, D3, P31, P53, P15, P9, P57, D1, P63, P29, P37, P19, P33, D7	16
2L	501427	C	A	germline_recurrent	P35, P41, P11, D3, P31, P53, P15, P9, P57, D1, P63, P29, P37, P7, P49, P43, P19, P33, D7	19
2L	501530	G	T	germline_recurrent	P35, P41, P11, P5, D3, P65, P31, D5, P17, P53, P15, P27, P9, P57, D1, P63, P29, P47, P23, P51, P37, P7, P49, P43, P25, P19, P45a, P55, P33, D7, P61	31
2L	501991	C	A	germline_recurrent	P35, P41, P11, P5, D3, P65, P31, P59, D5, P53, P15, P27, P9, P57, D1, P63, P29, P37, P7, P49, P43, P25, P19, P45a, P55, P33, D7	27
2L	502166	G	T	germline_recurrent	P35, P41, P11, P5, D3, P65, P31, P59, P17, P53, P15, P27, P9, P57, D1, P63, P29, P39, P23, P51, P37, P7, P49, P43, P25, P19, P45a, P55, P33, P61	30
2L	502304	A	G	germline_recurrent	P35, P41, P11, P65, P31, P59, P53, P15, P27, P9, P57, P63, P29, P39, P51, P37, P7, P49, P43, P19, P45a, P55, P33, P61	24
2L	502520	T	G	germline_recurrent	P35, P41, P11, P5, P65, P31, P59, P17, P53, P15, P27, P9, P57, P63, P29, P23, P51, P37, P7, P49, P43, P25, P19, P45a, P55, P33, P61	27
2L	503357	A	G	germline_recurrent	P35, P41, P11, P5, D3, P65, P31, P59, D5, P17, P53, P15, P27, P9, P57, D1, P63, P29, P47, P23, P51, P37, P7, P49, P43, P25, P19, P45a, P55, P33, D7, P61	32
2L	503551	G	A	germline_recurrent	P35, P41, P11, P5, D3, P65, P31, P59, D5, P17, P53, P15, P27, P9, P57, D1, P63, P29, P39, P47, P23, P51, P37, P7, P49, P43, P25, P19, P45a, P55, P33, D7, P61	33
2L	503577	C	G	germline_recurrent	P35, P41, P11, D3, P65, P31, P59, D5, P17, P53, P15, P27, P9, P57, D1, P63, P29, P39, P47, P23, P51, P37, P7, P49, P43, P25, P19, P45a, P55, P33, D7, P61	32
2L	503589	G	T	germline_recurrent	P35, P41, P11, D3, P31, P59, D5, P17, P53, P15, P27, P9, P57, D1, P63, P29, P39, P23, P51, P37, P7, P49, P43, P25, P19, P45a, P55, P33, D7, P61	30
2L	503619	T	A	germline_recurrent	P35, P41, P11, P65, P31, P59, D5, P17, P53, P15, P27, P9, P57, P63, P29, P39, P47, P23, P51, P37, P7, P49, P43, P25, P19, P45a, P55, P33, D7	29
2L	503627	A	T	germline_recurrent	P35, P41, P11, P65, P31, P59, D5, P17, P53, P15, P27, P9, P57, P63, P29, P39, P47, P51, P37, P7, P49, P43, P19, P45a, P55, P33, D7, P61	28
2L	503660	T	A	germline_recurrent	P35, P41, P11, P65, P31, P59, D5, P17, P53, P15, P27, P9, P57, P63, P29, P39, P3, P47, P51, P37, P7, P49, P43, P25, P19, P45a, P55, P33, D7, P61	30
2L	503679	C	A	germline_recurrent	P35, P41, P11, P65, P31, P59, D5, P17, P53, P15, P27, P9, P57, P63, P29, P39, P47, P51, P37, P7, P49, P43, P25, P19, P45a, P55, P33, D7, P61	29
2L	503686	A	C	germline_recurrent	P35, P41, P11, D3, P65, P31, P59, D5, P17, P53, P15, P27, P9, P57, D1, P63, P29, P39, P47, P51, P37, P7, P49, P43, P25, P19, P45a, P55, P33, D7, P61	31
2L	503730	A	T	germline_recurrent	P35, P41, P11, D3, P65, P31, P59, D5, P17, P53, P15, P27, P9, P57, D1, P63, P29, P39, P47, P23, P51, P37, P7, P49, P43, P25, P19, P45a, P55, P33, D7, P61	32
2L	504059	G	A	germline_recurrent	P35, P41, P11, D3, P65, P31, P59, P17, P53, P15, P27, P9, P57, D1, P63, P29, P47, P37, P7, P49, P43, P25, P19, P45a, P55, P33, P61	27
2L	504107	A	G	germline_recurrent	P35, P41, P11, D3, P31, P59, P17, P53, P15, P27, P9, P57, D1, P63, P29, P47, P37, P7, P49, P43, P25, P19, P33, D7	24
2L	504142	A	C	germline_recurrent	P35, P41, P11, D3, P65, P31, P59, P17, P53, P15, P27, P9, P57, D1, P63, P29, P51, P37, P7, P49, P43, P25, P19, P45a, P55, P33	26
2L	504151	G	A	germline_recurrent	P35, P41, P11, D3, P65, P31, P59, P17, P53, P15, P27, P9, P57, D1, P63, P29, P51, P37, P7, P49, P43, P25, P19, P45a, P55, P33	26
2L	504449	G	C	germline_recurrent	P35, P41, P11, P5, D3, P65, P31, P59, D5, P17, P53, P15, P27, P9, P57, D1, P63, P29, P39, P3, P47, P23, P51, P37, P7, P49, P43, P25, P19, P45a, P55, P33, D7, P61	34
2L	504462	A	C	germline_recurrent	P35, P41, P11, D3, P65, P31, P59, D5, P17, P53, P15, P27, P9, P57, D1, P63, P29, P39, P3, P47, P23, P51, P37, P7, P49, P43, P25, P19, P45a, P55, P33, D7, P61	33
2L	504521	T	G	germline_recurrent	P35, P41, P11, D3, P65, P31, P59, D5, P17, P53, P15, P27, P9, P57, D1, P63, P29, P3, P47, P23, P37, P7, P49, P43, P25, P19, P55, P33, D7	29
2L	504637	C	T	germline_recurrent	P35, P41, P11, P65, P31, P59, P17, P53, P15, P27, P9, P1, P57, P63, P29, P47, P23, P51, P37, P7, P49, P43, P25, P19, P45a, P55, P33, P61	28
2L	504690	A	G	germline_recurrent	P35, P41, P11, P5, D3, P65, P31, P59, D5, P17, P53, P15, P27, P9, P1, P57, D1, P63, P29, P39, P47, P23, P51, P37, P7, P49, P43, P25, P19, P45a, P55, P33, D7, P61	34
2L	504706	G	A	germline_recurrent	P35, P41, P11, P5, D3, P65, P31, P59, P17, P53, P15, P27, P9, P57, D1, P63, P29, P39, P47, P23, P51, P37, P7, P49, P43, P25, P19, P45a, P55, P33, P61	31
2L	504880	C	T	germline_recurrent	P35, P41, P11, D3, P65, P31, D5, P53, P15, P27, P9, P57, D1, P63, P29, P47, P37, P7, P43, P19, P55, P33, D7	23
2L	504941	C	T	germline_recurrent	P35, P41, P11, D3, P65, P31, P53, P15, P27, P9, P57, D1, P63, P29, P47, P37, P7, P49, P43, P19, P45a, P55, P33, D7	24
2L	504950	G	A	germline_recurrent	P35, P41, P11, D3, P65, P31, P59, P53, P15, P27, P9, P57, D1, P63, P29, P47, P51, P37, P7, P49, P43, P19, P45a, P55, P33, D7, P61	27
2L	504959	C	G	germline_recurrent	P35, P41, P11, D3, P65, P31, P17, P53, P15, P27, P9, P57, D1, P63, P29, P47, P37, P7, P49, P43, P19, P45a, P55, P33, D7, P61	26
2L	504989	C	T	germline_recurrent	P35, P41, P11, D3, P65, P31, P17, P53, P15, P27, P9, P1, P57, D1, P63, P29, P47, P51, P37, P7, P49, P43, P19, P45a, P55, P33, D7, P61	28
2L	505402	C	T	germline_recurrent	P35, P41, P11, D3, P65, P31, P59, D5, P17, P53, P15, P27, P9, P57, D1, P63, P29, P39, P47, P23, P51, P37, P7, P49, P43, P25, P19, P45a, P55, P33, D7, P61	32
2L	505440	T	A	germline_recurrent	P35, P41, P11, P5, D3, P65, P31, P59, D5, P17, P53, P15, P27, P9, P57, D1, P63, P29, P39, P3, P47, P51, P37, P7, P49, P43, P25, P19, P45a, P55, P33, D7, P61	33
2L	505648	C	G	germline_recurrent	P35, P41, P11, D3, P31, P15, P9, D1, P29, P3, P37, P43, P19, P33, D7	15
2L	505733	C	T	germline_recurrent	P35, P41, P11, D3, P65, P31, P59, P17, P53, P15, P27, P9, P57, D1, P63, P29, P39, P3, P51, P37, P49, P43, P19, P45a, P55, P33, D7, P61	28
2L	505829	T	G	germline_recurrent	P35, P41, P11, P5, D3, P65, P31, P59, D5, P53, P15, P27, P9, P57, D1, P63, P29, P3, P47, P23, P51, P37, P7, P49, P43, P25, P19, P45a, P55, P33, D7, P61	32
2L	506088	G	C	germline_recurrent	P35, P41, P11, D3, P65, P31, P59, D5, P53, P15, P27, P9, P57, D1, P63, P29, P39, P47, P23, P51, P37, P7, P49, P43, P25, P19, P45a, P55, P33, D7, P61	31
2L	506116	C	T	germline_recurrent	P35, P41, P11, P5, D3, P65, P31, P59, D5, P17, P53, P15, P27, P9, P57, D1, P63, P29, P39, P47, P23, P51, P37, P7, P49, P43, P25, P19, P45a, P55, P33, D7, P61	33
2L	506158	C	T	germline_recurrent	P35, P41, P11, D3, P65, P31, P59, D5, P17, P53, P15, P27, P9, P57, D1, P63, P29, P39, P47, P23, P51, P37, P7, P49, P43, P25, P19, P45a, P55, P33, D7	31
2L	506497	G	T	germline_recurrent	P35, P41, P11, P5, D3, P65, P31, P59, D5, P17, P53, P15, P27, P9, P57, D1, P63, P29, P39, P47, P23, P51, P37, P7, P49, P43, P25, P19, P45a, P55, P33, D7, P61	33
2L	506583	G	A	germline_recurrent	P35, P41, P11, P65, P31, P59, P53, P15, P27, P9, P57, P63, P29, P47, P23, P51, P37, P7, P49, P43, P25, P19, P45a, P55, P33, P61	26
2L	506971	C	T	germline_recurrent	P35, P41, P11, P5, P65, P31, P59, P17, P53, P15, P27, P9, P57, P63, P29, P47, P51, P37, P7, P49, P43, P25, P19, P45a, P33	25
2L	506999	C	G	germline_recurrent	P35, P41, P11, P5, D3, P65, P31, P59, P17, P53, P15, P27, P9, P57, D1, P63, P29, P3, P51, P37, P49, P43, P19, P45a, P55, P33, D7	27
2L	507075	T	A	germline_recurrent	P35, P41, P11, D3, P65, P31, P59, P53, P15, P27, P9, P57, D1, P63, P29, P47, P51, P37, P7, P49, P43, P19, P45a, P33, D7, P61	26
2L	507102	G	C	germline_recurrent	P35, P41, P11, D3, P31, P59, P53, P15, P27, P9, P57, D1, P63, P29, P37, P7, P49, P43, P19, P45a, P33, D7	22
2L	507114	A	T	germline_recurrent	P35, P41, P11, D3, P65, P31, P59, P53, P15, P27, P9, P57, D1, P63, P29, P37, P7, P49, P43, P19, P45a, P33, D7	23
2L	507128	G	A	germline_recurrent	P35, P41, P11, D3, P65, P31, P59, D5, P17, P53, P15, P27, P9, P57, D1, P63, P29, P37, P7, P49, P43, P25, P19, P45a, P33, D7, P61	27
2L	507163	C	T	germline_recurrent	P35, P41, P11, D3, P31, D5, P17, P53, P15, P27, P9, P1, P57, D1, P63, P29, P37, P7, P49, P43, P25, P19, P45a, P33, D7, P61	26
2L	507284	T	C	germline_recurrent	P35, P41, P11, D3, P31, P59, D5, P53, P15, P27, P9, P57, D1, P63, P29, P47, P37, P7, P49, P43, P19, P45a, P55, P33, D7	25
2L	507635	A	C	germline_recurrent	P35, P41, P11, D3, P65, P31, P59, D5, P53, P15, P27, P9, P57, D1, P63, P29, P23, P37, P7, P43, P25, P19, P55, P33, D7	25
2L	507671	C	T	germline_recurrent	P35, P41, P11, D3, P65, P31, P59, D5, P53, P15, P27, P9, P57, D1, P63, P29, P23, P51, P37, P7, P43, P25, P19, P45a, P55, P33, D7	27
2L	507708	C	T	germline_recurrent	P35, P41, P11, D3, P65, P31, P59, D5, P17, P53, P15, P27, P9, P57, D1, P63, P29, P23, P51, P37, P49, P43, P19, P45a, P55, P33, D7, P61	28
2L	507750	G	A	germline_recurrent	P35, P41, P11, P65, P31, P59, P53, P15, P27, P9, P57, P63, P29, P37, P49, P43, P19, P33, P61	19
2L	507839	T	G	germline_recurrent	P35, P41, P11, D3, P65, P31, P59, P17, P53, P15, P27, P9, P57, D1, P63, P29, P37, P7, P49, P43, P19, P55, P33	23
2L	508210	A	G	germline_recurrent	P35, P41, P11, D3, P65, P31, P59, D5, P17, P53, P15, P27, P9, P57, D1, P63, P29, P39, P47, P23, P51, P37, P7, P49, P43, P25, P19, P45a, P55, P33, D7	31
2L	508365	A	C	germline_recurrent	P35, P41, P11, P65, P31, P59, P17, P53, P15, P27, P9, P57, P63, P29, P39, P23, P51, P37, P7, P49, P43, P25, P19, P45a, P55, P33, P61	27
2L	508428	T	C	germline_recurrent	P35, P41, P11, P5, D3, P31, P59, D5, P17, P53, P15, P27, P9, P57, D1, P63, P29, P39, P47, P23, P51, P37, P7, P49, P43, P25, P19, P45a, P55, P33, D7, P61	32
2L	508695	T	C	germline_recurrent	P35, P41, P11, P5, D3, P65, P31, P59, P17, P53, P15, P27, P9, P57, D1, P63, P29, P3, P51, P37, P7, P43, P19, P45a, P33, D7	26
2L	509232	A	G	germline_recurrent	P35, P41, P11, D3, P65, P31, P59, D5, P53, P15, P27, P9, P57, D1, P63, P29, P39, P47, P23, P51, P37, P7, P49, P43, P25, P19, P45a, P55, P33, D7, P61	31
2L	509897	T	A	germline_recurrent	P35, P41, P11, D3, P65, P31, P59, D5, P17, P53, P15, P27, P9, P57, D1, P63, P29, P47, P37, P7, P49, P43, P25, P19, P45a, P55, P33, D7, P61	29
2L	510024	T	G	germline_recurrent	P35, P41, P11, P5, D3, P65, P31, P59, D5, P17, P53, P15, P27, P9, P1, P57, D1, P63, P29, P39, P3, P47, P23, P51, P37, P7, P49, P43, P19, P45a, P55, P33, D7, P61	34
2L	510458	G	C	germline_recurrent	P35, P41, P11, D3, P65, P31, P59, D5, P17, P53, P15, P27, P9, P57, D1, P63, P29, P39, P47, P23, P51, P37, P7, P49, P43, P25, P19, P45a, P55, P33, D7, P61	32
2L	510632	T	G	germline_recurrent	P35, P41, P11, P5, D3, P65, P31, P59, D5, P17, P53, P15, P27, P9, P57, D1, P63, P29, P39, P47, P23, P51, P37, P7, P49, P43, P25, P19, P45a, P55, P33, D7, P61	33
2L	510752	G	C	germline_recurrent	P35, P41, P11, D3, P65, P31, P59, D5, P53, P15, P27, P9, P1, P57, D1, P63, P29, P39, P47, P23, P51, P37, P7, P49, P43, P25, P19, P45a, P55, P33, D7, P61	32
2L	510802	T	G	germline_recurrent	P35, P41, P11, P65, P31, P59, D5, P53, P15, P27, P9, P1, P57, P63, P29, P47, P23, P51, P37, P7, P49, P43, P25, P19, P45a, P55, P33, D7, P61	29
2L	511052	G	C	germline_recurrent	P35, P41, P11, P5, D3, P65, P31, P59, D5, P17, P53, P15, P27, P9, P1, P57, D1, P63, P29, P39, P47, P51, P37, P7, P49, P43, P25, P19, P45a, P55, P33, D7, P61	33
2L	511102	A	T	germline_recurrent	P35, P41, P11, P5, D3, P65, P31, P59, D5, P17, P53, P15, P27, P9, P57, D1, P63, P29, P47, P51, P37, P7, P49, P43, P19, P45a, P55, P33, D7, P61	30
2L	511148	T	C	germline_recurrent	P35, P41, P11, P5, D3, P65, P31, P59, D5, P17, P53, P15, P27, P9, P57, D1, P63, P29, P47, P23, P51, P37, P7, P49, P43, P19, P45a, P55, P33, D7, P61	31
2L	511349	A	G	germline_recurrent	P35, P41, P11, P5, D3, P65, P31, P59, D5, P53, P15, P27, P9, P57, D1, P63, P29, P47, P23, P51, P37, P7, P49, P43, P25, P19, P45a, P55, P33, D7, P61	31
2L	511354	T	G	germline_recurrent	P35, P41, P11, P5, D3, P65, P31, P59, D5, P53, P15, P27, P9, P57, D1, P63, P29, P47, P23, P51, P37, P7, P49, P43, P25, P19, P45a, P55, P33, D7, P61	31
2L	511374	G	A	germline_recurrent	P35, P41, P11, P5, D3, P65, P31, P59, D5, P17, P53, P15, P27, P9, P57, D1, P63, P29, P47, P23, P51, P37, P7, P49, P43, P25, P19, P45a, P55, P33, D7, P61	32
2L	511519	G	A	germline_recurrent	P35, P41, P11, D3, P65, P31, P59, D5, P53, P15, P27, P9, P57, D1, P63, P29, P51, P37, P7, P49, P43, P19, P45a, P33, D7, P61	26
2L	511645	T	C	germline_recurrent	P35, P41, P11, D3, P31, P59, P53, P15, P9, D1, P63, P29, P3, P37, P7, P49, P43, P19, P33, D7	20
2L	512049	G	A	germline_recurrent	P35, P41, P11, P65, P31, P59, P53, P15, P27, P9, P57, P63, P29, P23, P37, P7, P49, P25, P19, P55, P33	21
2L	512209	T	C	germline_recurrent	P35, P41, P11, P31, P59, D5, P53, P15, P27, P9, P57, P63, P29, P3, P51, P37, P7, P49, P43, P19, P45a, P33, D7	23
2L	512380	T	A	germline_recurrent	P35, P41, P11, P5, D3, P65, P31, P59, D5, P17, P53, P15, P27, P9, P1, P57, D1, P63, P29, P39, P47, P23, P51, P37, P7, P49, P43, P25, P19, P45a, P55, P33, D7, P61	34
2L	512391	A	G	germline_recurrent	P35, P41, P11, P5, D3, P65, P31, P59, D5, P17, P53, P15, P27, P9, P1, P57, D1, P63, P29, P39, P47, P23, P51, P37, P7, P49, P43, P25, P19, P45a, P55, P33, D7, P61	34
2L	512404	T	C	germline_recurrent	P35, P41, P11, P5, P65, P31, P59, P17, P53, P15, P27, P9, P1, P57, P63, P29, P47, P23, P51, P37, P7, P49, P43, P25, P19, P45a, P55, P33, P61	29
2L	512473	A	C	germline_recurrent	P35, P41, P11, P5, D3, P65, P31, P59, D5, P53, P15, P27, P9, P1, P57, D1, P63, P29, P39, P47, P23, P51, P37, P7, P49, P43, P19, P45a, P55, P33, D7, P61	32
2L	513099	A	G	germline_recurrent	P35, P41, P11, P5, D3, P31, P59, D5, P53, P15, P27, P9, P57, D1, P63, P29, P39, P3, P47, P23, P51, P37, P7, P49, P43, P25, P19, P33, D7, P61	30
2L	513405	G	A	germline_recurrent	P35, P41, P11, P5, D3, P65, P31, P59, D5, P17, P53, P15, P27, P9, P57, D1, P63, P29, P39, P47, P23, P51, P37, P7, P49, P43, P25, P19, P45a, P33, D7, P61	32
2L	513424	A	T	germline_recurrent	P35, P41, P11, P5, D3, P65, P31, P59, D5, P17, P53, P15, P27, P9, P57, D1, P63, P29, P39, P47, P23, P51, P37, P7, P49, P43, P25, P19, P45a, P55, P33, D7, P61	33
2L	513636	A	T	germline_recurrent	P35, P41, P11, P5, D3, P65, P31, P59, D5, P17, P53, P15, P27, P9, P57, D1, P63, P29, P39, P47, P37, P7, P49, P43, P25, P19, P45a, P55, P33, D7	30
2L	513765	A	G	germline_recurrent	P35, P41, P11, P5, D3, P65, P31, P59, D5, P17, P53, P15, P27, P9, P57, D1, P63, P29, P39, P47, P51, P37, P7, P49, P43, P25, P19, P45a, P55, P33, D7, P61	32
2L	514262	C	T	germline_recurrent	P35, P41, P11, D3, P65, P31, P59, P53, P15, P27, P9, P57, D1, P63, P29, P39, P47, P23, P51, P37, P7, P49, P43, P25, P19, P45a, P55, P33, P61	29
2L	514292	T	C	germline_recurrent	P35, P41, P11, D3, P65, P31, P59, D5, P53, P15, P27, P9, P57, D1, P63, P29, P39, P23, P51, P37, P7, P49, P43, P25, P19, P45a, P55, P33, D7, P61	30
2L	514422	A	G	germline_recurrent	P35, P41, P11, P65, P31, P59, D5, P17, P53, P15, P27, P9, P57, P63, P29, P39, P47, P23, P51, P37, P7, P49, P43, P25, P19, P45a, P55, P33, D7, P61	30
2L	514556	G	T	germline_recurrent	P35, P41, P11, D3, P65, P31, P59, D5, P17, P53, P15, P27, P9, P57, D1, P63, P29, P39, P47, P23, P51, P37, P7, P49, P43, P25, P19, P45a, P55, P33, D7, P61	32
2L	514570	G	C	germline_recurrent	P35, P41, P11, D3, P65, P31, P59, D5, P17, P53, P15, P27, P9, P57, D1, P63, P29, P39, P47, P23, P51, P37, P7, P49, P43, P25, P19, P45a, P55, P33, D7, P61	32
2L	514715	T	C	germline_recurrent	P35, P41, P11, D3, P65, P31, P59, D5, P17, P53, P15, P27, P9, P57, D1, P63, P29, P39, P47, P23, P51, P37, P7, P49, P43, P25, P19, P45a, P55, P33, D7, P61	32
2L	514802	C	A	germline_recurrent	P35, P41, P11, D3, P65, P31, P59, D5, P17, P53, P15, P27, P9, P57, D1, P63, P29, P39, P47, P23, P51, P37, P49, P43, P25, P19, P45a, P55, P33, D7, P61	31
2L	514900	T	G	germline_recurrent	P35, P41, P11, D3, P65, P31, P59, D5, P17, P53, P15, P27, P9, P57, D1, P63, P29, P39, P47, P51, P37, P49, P43, P19, P55, P33, D7, P61	28
2L	515035	C	T	germline_recurrent	P35, P41, P11, D3, P65, P31, P59, D5, P53, P15, P27, P9, P57, D1, P63, P29, P47, P23, P51, P37, P49, P43, P25, P19, P45a, P55, P33, D7, P61	29
2L	515063	A	T	germline_recurrent	P35, P41, P11, D3, P65, P31, P59, D5, P53, P15, P27, P9, P57, D1, P63, P29, P47, P23, P51, P37, P49, P43, P25, P19, P45a, P55, P33, D7	28
2L	515071	T	A	germline_recurrent	P35, P41, P11, D3, P65, P31, P59, D5, P53, P15, P27, P9, P57, D1, P63, P29, P47, P23, P51, P37, P49, P43, P25, P19, P45a, P55, P33, D7	28
2L	515128	A	G	germline_recurrent	P35, P41, P11, D3, P65, P31, P59, D5, P53, P15, P27, P9, P57, D1, P63, P29, P47, P23, P51, P37, P49, P43, P25, P19, P45a, P55, P33, D7, P61	29
2L	515142	G	A	germline_recurrent	P35, P41, P11, D3, P65, P31, P59, D5, P53, P15, P27, P9, P57, D1, P63, P29, P47, P51, P37, P7, P49, P43, P25, P19, P55, P33, D7, P61	28
2L	515314	C	T	germline_recurrent	P35, P41, P11, D3, P65, P31, P59, D5, P53, P15, P27, P9, P57, D1, P63, P29, P39, P47, P23, P37, P7, P49, P43, P25, P19, P45a, P55, P33, D7, P61	30
2L	515471	G	A	germline_recurrent	P35, P41, P11, P5, D3, P65, P31, P59, P53, P27, P9, D1, P63, P29, P37, P49, P43, P25, P19, P33, D7	21
2L	515919	A	G	germline_recurrent	P35, P41, P11, D3, P65, P31, P59, P53, P15, P27, P9, P57, D1, P63, P29, P23, P51, P37, P7, P49, P43, P25, P19, P55, P33, P61	26
2L	516087	C	T	germline_recurrent	P35, P41, P11, D3, P31, P59, D5, P53, P15, P27, P9, P57, D1, P63, P29, P51, P37, P7, P43, P19, P55, P33, D7	23
2L	516219	T	C	germline_recurrent	P35, P41, P11, P65, P31, P59, P17, P53, P15, P9, P57, P63, P29, P39, P51, P37, P7, P49, P43, P19, P55, P33	22
2L	516246	T	C	germline_recurrent	P35, P41, P11, P65, P31, P59, P17, P53, P15, P27, P9, P57, P63, P29, P39, P47, P51, P37, P7, P49, P43, P19, P55, P33	24
2L	516272	G	T	germline_recurrent	P35, P41, P11, P65, P31, P59, P17, P53, P15, P27, P9, P1, P57, P63, P29, P39, P47, P51, P37, P7, P49, P43, P25, P19, P55, P33, P61	27
2L	516283	C	T	germline_recurrent	P35, P41, P11, P65, P31, P59, P17, P53, P15, P27, P9, P1, P57, P63, P29, P39, P47, P23, P51, P37, P7, P49, P43, P25, P19, P55, P33, P61	28
2L	516834	C	G	germline_recurrent	P35, P41, P11, D3, P65, P31, P53, P15, P27, P9, P57, D1, P63, P29, P39, P51, P37, P49, P43, P25, P19, P55, P33, P61	24
2L	516879	G	C	germline_recurrent	P35, P41, P11, D3, P65, P31, P59, P53, P15, P27, P9, P57, D1, P63, P29, P39, P37, P49, P43, P19, P55, P33, P61	23
2L	516981	G	C	germline_recurrent	P35, P41, P11, D3, P65, P31, P59, P53, P15, P27, P9, P57, D1, P63, P29, P23, P37, P7, P49, P43, P25, P19, P33	23
2L	517328	G	A	germline_recurrent	P35, P41, P11, D3, P65, P31, P59, P53, P15, P27, P9, P57, D1, P63, P29, P51, P37, P7, P49, P43, P19, P45a, P55, P33, P61	25
2L	517361	C	A	germline_recurrent	P35, P41, P11, D3, P65, P31, P59, D5, P17, P53, P15, P27, P9, P57, D1, P63, P29, P3, P51, P37, P7, P49, P43, P19, P45a, P55, P33, D7, P61	29
2L	517605	A	T	germline_recurrent	P35, P41, P11, D3, P65, P31, P59, P17, P53, P15, P27, P9, P57, D1, P63, P29, P39, P47, P23, P51, P37, P7, P49, P43, P25, P19, P45a, P55, P33, P61	30
2L	517737	G	A	germline_recurrent	P35, P41, P11, D3, P65, P31, P59, P53, P15, P27, P9, P1, P57, D1, P63, P29, P39, P47, P23, P51, P37, P7, P49, P43, P25, P19, P45a, P55, P33, P61	30
2L	517756	A	T	germline_recurrent	P35, P41, P11, D3, P65, P31, P59, P53, P15, P27, P9, P1, P57, D1, P63, P29, P23, P51, P37, P7, P49, P43, P25, P19, P45a, P55, P33, P61	28
2L	517763	C	A	germline_recurrent	P35, P41, P11, D3, P65, P31, P59, P53, P15, P27, P9, P1, P57, D1, P63, P29, P23, P51, P37, P7, P49, P43, P25, P19, P45a, P55, P33, P61	28
2L	517789	T	C	germline_recurrent	P35, P41, P11, D3, P65, P31, P59, P53, P15, P27, P9, P1, P57, D1, P63, P29, P23, P51, P37, P7, P49, P43, P25, P19, P45a, P55, P33, P61	28
2L	517821	A	G	germline_recurrent	P35, P41, P11, D3, P65, P31, P59, P53, P15, P27, P9, P1, P57, D1, P63, P29, P47, P23, P51, P37, P49, P43, P25, P19, P45a, P55, P33, P61	28
2L	517873	T	C	germline_recurrent	P35, P41, P11, P5, D3, P65, P31, P59, D5, P53, P15, P27, P9, P57, D1, P63, P29, P39, P47, P23, P51, P37, P7, P49, P43, P25, P19, P45a, P55, P33, D7, P61	32
2L	518419	A	G	germline_recurrent	P35, P41, P11, D3, P65, P31, P59, D5, P17, P53, P15, P27, P9, P57, D1, P63, P29, P39, P47, P23, P51, P37, P7, P49, P43, P25, P19, P45a, P55, P33, D7, P61	32
2L	518748	T	C	germline_recurrent	P35, P41, P11, D3, P65, P31, P59, D5, P17, P53, P15, P27, P9, P57, D1, P63, P29, P23, P51, P37, P7, P49, P43, P25, P19, P45a, P55, P33, D7, P61	30
2L	518814	C	A	germline_recurrent	P35, P41, P11, P5, D3, P65, P31, P59, D5, P53, P15, P27, P9, P57, D1, P63, P29, P39, P23, P51, P37, P7, P49, P43, P25, P19, P45a, P55, P33, D7, P61	31
2L	518826	T	G	germline_recurrent	P35, P41, P11, P5, D3, P65, P31, P59, D5, P53, P15, P27, P9, P57, D1, P63, P29, P39, P23, P51, P37, P7, P49, P43, P25, P19, P45a, P55, P33, D7, P61	31
2L	518935	C	T	germline_recurrent	P35, P41, P11, D3, P65, P31, P59, P17, P53, P15, P27, P9, P1, P57, D1, P63, P29, P47, P51, P37, P7, P49, P43, P25, P19, P45a, P55, P33, P61	29
2L	518977	A	G	germline_recurrent	P35, P41, P11, P5, D3, P65, P31, P59, D5, P17, P53, P15, P27, P9, P57, D1, P63, P29, P47, P51, P37, P7, P49, P43, P25, P19, P45a, P55, P33, D7	30
2L	518989	C	T	germline_recurrent	P35, P41, P11, D3, P65, P31, P53, P15, P27, P9, P57, D1, P63, P29, P47, P51, P37, P49, P43, P19, P45a, P55, P33	23
2L	519045	C	A	germline_recurrent	P35, P41, P11, P5, D3, P65, P31, P59, D5, P53, P15, P9, P57, D1, P63, P3, P47, P37, P49, P43, P19, P45a, D7	23
2L	519058	T	A	germline_recurrent	P35, P41, P11, D3, P65, P31, P59, P53, P15, P27, P57, D1, P63, P3, P47, P37, P49, P43, P19, P45a, P33	21
2L	519087	G	C	germline_recurrent	P35, P41, P11, D3, P65, P31, P59, P53, P15, P27, P9, P57, D1, P63, P29, P47, P37, P49, P43, P19, P45a, P55, P33	23
2L	519093	T	A	germline_recurrent	P35, P41, P11, D3, P65, P31, P59, P53, P15, P27, P9, P57, D1, P63, P29, P3, P47, P37, P7, P49, P43, P19, P45a, P55, P33	25
2L	519176	A	G	germline_recurrent	P35, P41, P11, P5, D3, P65, P31, P59, D5, P53, P15, P27, P9, P57, D1, P63, P29, P39, P47, P23, P51, P37, P7, P49, P43, P25, P19, P45a, P55, P33, D7, P61	32
2L	519192	G	A	germline_recurrent	P35, P41, P11, P65, P31, P59, P53, P15, P27, P9, P57, P63, P29, P47, P23, P51, P37, P7, P49, P43, P25, P19, P45a, P55, P33, P61	26
2L	519871	C	G	germline_recurrent	P35, P41, P11, P5, D3, P65, P31, P59, D5, P17, P53, P15, P27, P9, P57, D1, P63, P29, P39, P47, P23, P51, P37, P7, P49, P43, P25, P19, P45a, P55, P33, D7, P61	33
2L	519996	G	C	germline_recurrent	P35, P41, P11, P5, D3, P65, P31, P59, P15, P9, P1, D1, P63, P29, P37, P7, P49, P43, P19, P33, D7	21
2L	520184	G	A	germline_recurrent	P35, P41, P11, P5, D3, P65, P31, P59, D5, P17, P53, P15, P27, P9, P57, D1, P63, P29, P39, P47, P23, P51, P37, P7, P49, P43, P25, P19, P45a, P55, P33, D7, P61	33
2L	520190	G	A	germline_recurrent	P35, P41, P11, P5, D3, P65, P31, P59, D5, P17, P53, P15, P27, P9, P57, D1, P63, P29, P47, P23, P51, P37, P7, P49, P43, P25, P19, P45a, P55, P33, D7, P61	32
2L	520339	G	C	germline_recurrent	P35, P41, P11, D3, P65, P31, P59, D5, P53, P15, P27, P9, P57, D1, P63, P29, P3, P47, P23, P51, P37, P49, P43, P19, P45a, P55, P33, D7, P61	29
2L	520562	G	C	germline_recurrent	P35, P41, P11, P5, D3, P65, P31, P59, D5, P53, P15, P27, P9, P1, P57, D1, P63, P29, P47, P23, P51, P37, P49, P43, P25, P19, P45a, P55, P33, D7, P61	31
2L	520585	A	G	germline_recurrent	P35, P41, P11, P5, D3, P65, P31, P59, D5, P17, P53, P15, P27, P9, P57, D1, P63, P29, P47, P23, P51, P37, P7, P49, P43, P25, P19, P45a, P55, P33, D7, P61	32
2L	520725	G	A	germline_recurrent	P35, P41, P11, P65, P31, P59, P17, P53, P15, P27, P9, P57, P63, P29, P3, P47, P51, P37, P49, P43, P19, P45a, P55, P33, P61	25
2L	520743	C	T	germline_recurrent	P35, P41, P11, D3, P65, P31, P59, D5, P17, P53, P15, P27, P9, P57, D1, P63, P29, P3, P47, P51, P37, P49, P43, P19, P45a, P55, P33, D7, P61	29
2L	520752	T	A	germline_recurrent	P35, P41, P11, P5, D3, P65, P31, P59, P17, P53, P15, P27, P9, P57, D1, P63, P29, P3, P47, P51, P37, P43, P19, P45a, P55, P33, D7, P61	28
2L	520791	T	C	germline_recurrent	P35, P41, P11, P5, D3, P65, P31, P59, P15, P27, P9, P57, D1, P63, P29, P47, P51, P37, P43, P19, P45a, P33, D7	23
2L	521108	T	C	germline_recurrent	P35, P41, P11, P5, D3, P65, P31, P59, D5, P53, P15, P27, P9, P57, D1, P63, P29, P47, P23, P51, P37, P7, P49, P43, P25, P19, P45a, P55, P33, D7, P61	31
2L	521120	G	C	germline_recurrent	P35, P41, P11, P5, D3, P65, P31, P59, D5, P53, P15, P27, P9, P57, D1, P63, P29, P47, P23, P51, P37, P7, P49, P43, P25, P19, P45a, P55, P33, D7, P61	31
2L	521283	A	C	germline_recurrent	P35, P41, P11, P5, D3, P65, P31, P59, D5, P17, P53, P15, P27, P9, P57, D1, P63, P29, P39, P47, P23, P51, P37, P7, P49, P43, P25, P19, P55, P33, D7, P61	32
2L	521426	G	A	germline_recurrent	P35, P41, P11, D3, P65, P31, P59, P17, P53, P15, P27, P9, P1, P57, D1, P63, P29, P51, P37, P49, P43, P25, P19, P45a, P33, D7	26
2L	521444	T	C	germline_recurrent	P35, P41, P11, P5, D3, P31, P59, P17, P53, P15, P27, P9, P1, P57, D1, P63, P29, P3, P47, P51, P37, P49, P43, P25, P19, P45a, P33, D7	28
2L	521454	A	C	germline_recurrent	P35, P41, P11, P5, D3, P31, P59, P53, P15, P27, P9, P1, P57, D1, P63, P29, P3, P51, P37, P49, P43, P25, P19, P45a, P33, D7	26
2L	521550	G	A	germline_recurrent	P35, P41, P11, P5, D3, P65, P31, D5, P15, P27, P9, P57, D1, P63, P29, P3, P37, P49, P43, P19, P45a, P33, D7	23
2L	521781	G	T	germline_recurrent	P35, P41, P11, D3, P65, P31, P59, D5, P53, P15, P27, P9, P57, D1, P63, P29, P39, P47, P51, P37, P7, P49, P43, P25, P19, P45a, P55, P33, D7, P61	30
2L	521790	C	T	germline_recurrent	P35, P41, P11, D3, P65, P31, P59, D5, P53, P15, P27, P9, P57, D1, P63, P29, P39, P47, P23, P51, P37, P49, P43, P25, P19, P45a, P33, D7, P61	29
2L	522035	C	G	germline_recurrent	P35, P41, P11, P5, D3, P65, P31, P59, P53, P15, P27, P9, P57, D1, P63, P29, P39, P47, P51, P37, P49, P43, P25, P19, P45a, P55, P33, P61	28
2L	522059	T	A	germline_recurrent	P35, P41, P11, P5, D3, P65, P31, P59, D5, P53, P15, P27, P9, P57, D1, P63, P29, P47, P51, P37, P49, P43, P19, P45a, P55, P33, D7, P61	28
2L	522142	C	T	germline_recurrent	P35, P41, P11, D3, P65, P31, P59, P53, P15, P27, P9, P57, D1, P63, P29, P47, P37, P7, P49, P43, P19, P45a, P55, P33, P61	25
2L	522179	A	G	germline_recurrent	P35, P41, P11, P5, D3, P65, P31, P59, D5, P53, P15, P27, P9, P57, D1, P63, P29, P47, P51, P37, P7, P49, P43, P25, P19, P45a, P55, P33, D7, P61	30
2L	522347	T	G	germline_recurrent	P35, P41, P11, P5, D3, P65, P31, P59, D5, P53, P15, P27, P9, P57, D1, P63, P29, P39, P47, P37, P7, P49, P43, P25, P19, P45a, P33, D7, P61	29
2L	522402	A	G	germline_recurrent	P35, P41, P11, P65, P31, P59, P53, P15, P27, P9, P57, P63, P29, P47, P51, P37, P49, P43, P19, P45a, P55, P33, P61	23
2L	522633	G	A	germline_recurrent	P35, P41, P11, P65, P31, P59, P53, P15, P27, P9, P57, P63, P29, P51, P37, P7, P49, P43, P25, P19, P45a, P55, P33	23
2L	522802	C	T	germline_recurrent	P35, P41, P11, D3, P65, P31, P59, D5, P53, P15, P27, P9, P57, D1, P63, P29, P47, P23, P51, P37, P49, P43, P25, P19, P55, P33, D7, P61	28
2L	522816	A	T	germline_recurrent	P35, P41, P11, D3, P65, P31, P59, D5, P53, P15, P27, P9, P57, D1, P63, P29, P51, P37, P49, P43, P25, P19, P55, P33, D7, P61	26
2L	522848	G	A	germline_recurrent	P35, P41, P11, D3, P31, D5, P53, P27, P9, P57, D1, P63, P29, P51, P37, P49, P43, P25, P19, P55, P33, D7, P61	23
2L	522901	T	C	germline_recurrent	P35, P41, P11, D3, P65, P31, P59, D5, P53, P15, P27, P9, P57, D1, P63, P29, P51, P37, P49, P43, P19, P55, P33, D7, P61	25
2L	523223	A	G	germline_recurrent	P35, P41, P11, P5, D3, P65, P31, P59, D5, P53, P15, P27, P9, P57, D1, P63, P29, P47, P23, P51, P37, P7, P49, P43, P25, P19, P45a, P55, P33, D7, P61	31
2L	523536	C	T	germline_recurrent	P35, P41, P11, P5, D3, P65, P31, P59, D5, P53, P15, P27, P9, P57, D1, P63, P29, P23, P51, P37, P49, P43, P25, P19, P45a, P55, P33, D7, P61	29
2L	523758	G	A	germline_recurrent	P35, P41, P11, D3, P65, P31, P59, D5, P17, P53, P15, P27, P9, P57, D1, P63, P29, P39, P47, P23, P51, P37, P7, P49, P43, P25, P19, P45a, P55, P33, D7, P61	32
2L	523803	C	T	germline_recurrent	P35, P41, P11, D3, P65, P31, P59, D5, P17, P53, P15, P27, P9, P57, D1, P63, P29, P39, P47, P23, P51, P37, P7, P49, P43, P25, P19, P45a, P55, P33, D7, P61	32
2L	523903	G	A	germline_recurrent	P35, P41, P11, D3, P65, P31, P59, D5, P17, P53, P15, P27, P9, P57, D1, P63, P29, P3, P51, P37, P7, P49, P43, P25, P19, P45a, P55, P33, D7, P61	30
2L	523938	C	A	germline_recurrent	P35, P41, P11, P65, P31, P59, P17, P53, P15, P27, P9, P57, P63, P29, P3, P23, P51, P37, P7, P49, P43, P25, P19, P45a, P55, P33, P61	27
2L	524095	C	A	germline_recurrent	P35, P41, P11, P65, P31, P59, P17, P53, P15, P27, P9, P57, P63, P29, P47, P37, P7, P49, P43, P19, P45a, P33	22
2L	524271	A	T	germline_recurrent	P35, P41, P11, P5, D3, P65, P31, D5, P53, P15, P27, P9, P57, D1, P63, P29, P37, P7, P49, P43, P25, P19, P45a, P55, P33, D7	26
2L	524304	T	C	germline_recurrent	P35, P41, P11, P65, P31, P17, P53, P15, P27, P9, P57, P63, P29, P47, P51, P37, P49, P43, P25, P19, P45a, P55, P33, P61	24
2L	524432	T	G	germline_recurrent	P35, P41, P11, P65, P31, P59, P17, P53, P15, P27, P9, P63, P29, P47, P51, P37, P7, P49, P43, P25, P19, P45a, P33, P61	24
2L	524541	A	G	germline_recurrent	P35, P41, P5, D3, P31, D5, P17, P15, D1, P63, P29, P37, P7, P19, D7	15
2L	524556	T	G	germline_recurrent	P35, P41, P5, D3, P31, D5, P15, D1, P63, P37, P7, P33, D7	13
2L	525267	A	G	germline_recurrent	P35, P41, P11, P5, D3, P65, P31, D5, P17, P53, P15, P27, P9, P1, P57, D1, P63, P29, P39, P47, P37, P7, P49, P43, P19, P45a, P55, P33, D7, P61	30
2L	525321	C	G	germline_recurrent	P35, P41, P11, D3, P65, P31, P59, D5, P53, P15, P27, P9, P57, D1, P63, P29, P39, P37, P49, P43, P25, P19, P45a, P55, P33, D7, P61	27
2L	525337	A	C	germline_recurrent	P35, P41, P11, D3, P65, P31, P59, D5, P53, P15, P27, P9, P57, D1, P63, P29, P39, P47, P37, P7, P49, P43, P25, P19, P45a, P55, P33, D7, P61	29
2L	525446	T	C	germline_recurrent	P35, P41, P11, D3, P65, P31, P59, D5, P53, P15, P27, P9, P57, D1, P63, P29, P37, P49, P43, P25, P19, P55, P33, D7, P61	25
2L	525531	C	T	germline_recurrent	P35, P41, P11, P5, D3, P65, P31, P59, D5, P53, P15, P27, P9, P57, D1, P63, P29, P47, P23, P51, P37, P7, P49, P43, P25, P19, P45a, P55, P33, D7, P61	31
2L	526182	C	A	germline_recurrent	P35, P41, P11, P5, D3, P65, P31, P59, D5, P17, P53, P15, P27, P9, P57, D1, P63, P29, P47, P23, P37, P7, P49, P43, P25, P19, P45a, P55, P33, D7, P61	31
2L	526366	T	C	germline_recurrent	P35, P41, P11, P5, D3, P65, P31, P59, D5, P17, P53, P15, P27, P9, P57, D1, P63, P29, P37, P7, P49, P43, P19, P33	24
2L	526431	A	T	germline_recurrent	P35, P41, P11, P5, D3, P65, P31, P59, P17, P53, P15, P27, P9, P1, P57, D1, P63, P29, P47, P37, P49, P43, P19, P45a, P33, D7, P61	27
2L	526461	T	A	germline_recurrent	P35, P41, P11, P5, D3, P65, P31, P59, P53, P15, P27, P9, P57, D1, P63, P29, P39, P51, P37, P49, P43, P19, P55, P33, D7, P61	26
2L	526483	C	T	germline_recurrent	P35, P41, P11, P5, D3, P65, P31, P59, P17, P53, P15, P27, P9, P1, P57, D1, P63, P29, P39, P37, P49, P43, P55, P33, D7, P61	26
2L	526695	T	G	germline_recurrent	P35, P41, P11, P5, P65, P31, P59, P17, P53, P15, P27, P9, P57, P63, P29, P47, P51, P37, P7, P49, P43, P25, P19, P45a, P55, P33, P61	27
2L	526704	G	C	germline_recurrent	P35, P41, P11, P5, P65, P31, P59, P17, P53, P15, P27, P9, P57, P63, P29, P47, P51, P37, P7, P49, P43, P25, P19, P45a, P55, P33, P61	27
2L	526805	A	G	germline_recurrent	P35, P41, P11, P5, D3, P65, P31, P59, D5, P17, P53, P15, P27, P9, P57, D1, P63, P29, P47, P23, P51, P37, P7, P49, P43, P25, P19, P45a, P55, P33, D7, P61	32
2L	527101	A	C	germline_recurrent	P35, P41, P11, D3, P65, P31, P59, D5, P17, P53, P15, P27, P9, P57, D1, P63, P29, P39, P3, P47, P23, P51, P37, P49, P43, P25, P19, P45a, P55, P33, D7, P61	32
2L	527111	G	A	germline_recurrent	P35, P41, P11, P5, D3, P65, P31, P59, D5, P17, P53, P15, P27, P9, P1, P57, D1, P63, P29, P39, P3, P51, P37, P49, P43, P25, P19, P45a, P55, P33, D7, P61	32
2L	527144	A	T	germline_recurrent	P35, P41, P11, P5, D3, P65, P31, P59, D5, P17, P53, P15, P27, P9, P57, D1, P63, P29, P39, P3, P51, P37, P7, P49, P43, P25, P19, P45a, P55, P33, D7, P61	32
2L	527157	C	T	germline_recurrent	P35, P41, P11, P5, D3, P65, P31, P59, D5, P17, P53, P15, P27, P9, P57, D1, P63, P29, P39, P3, P51, P37, P7, P49, P43, P19, P45a, P55, P33, D7, P61	31
2L	527189	T	A	germline_recurrent	P35, P41, P11, D3, P65, P31, P59, P17, P53, P15, P27, P9, P57, D1, P63, P29, P39, P51, P37, P7, P49, P43, P25, P19, P45a, P55, P33, P61	28
2L	527197	T	A	germline_recurrent	P35, P41, P11, D3, P65, P31, P59, D5, P17, P53, P15, P27, P9, P57, D1, P63, P29, P3, P51, P37, P7, P49, P43, P25, P19, P45a, P55, P33, D7, P61	30
2L	527245	C	T	germline_recurrent	P35, P41, P11, D3, P65, P31, P59, P17, P53, P15, P27, P9, P57, D1, P63, P29, P39, P47, P23, P51, P37, P7, P49, P43, P25, P19, P45a, P55, P33, P61	30
2L	527330	C	A	germline_recurrent	P35, P41, P11, P5, D3, P65, P31, P59, D5, P17, P53, P15, P27, P9, P1, P57, D1, P63, P29, P39, P47, P23, P51, P37, P7, P49, P43, P25, P19, P45a, P55, P33, D7, P61	34
2L	527381	A	G	germline_recurrent	P35, P41, P11, D3, P65, P31, P59, P17, P53, P15, P27, P9, P57, D1, P63, P29, P39, P47, P23, P51, P37, P7, P49, P43, P25, P19, P45a, P55, P33, P61	30
2L	527739	T	C	germline_recurrent	P35, P41, P11, D3, P65, P31, P59, D5, P17, P53, P15, P27, P9, P57, D1, P63, P29, P47, P23, P51, P37, P7, P49, P43, P25, P19, P55, P33, D7, P61	30
2L	527943	T	A	germline_recurrent	P35, P41, P11, D3, P65, P31, P59, D5, P53, P15, P27, P9, P57, D1, P63, P29, P39, P47, P23, P51, P37, P7, P49, P43, P25, P19, P45a, P55, P33, D7, P61	31
2L	528151	C	T	germline_recurrent	P35, P41, P11, D3, P65, P31, P59, D5, P53, P15, P27, P9, P57, D1, P63, P29, P39, P47, P23, P37, P7, P49, P43, P25, P19, P45a, P55, P33, D7, P61	30
2L	528185	G	A	germline_recurrent	P35, P41, P11, D3, P65, P31, P59, P17, P53, P15, P27, P9, P57, D1, P63, P29, P39, P47, P37, P49, P43, P25, P19, P45a, P55, P33, P61	27
2L	528267	T	A	germline_recurrent	P35, P41, P11, D3, P65, P31, P59, P17, P53, P15, P27, P9, P1, P57, D1, P63, P29, P47, P51, P37, P7, P49, P43, P25, P19, P45a, P55, P33, P61	29
2L	528292	C	G	germline_recurrent	P35, P41, P11, D3, P65, P31, P59, P17, P53, P15, P27, P9, P57, D1, P63, P29, P39, P47, P51, P37, P7, P49, P43, P25, P19, P45a, P55, P33, P61	29
2L	528352	T	G	germline_recurrent	P35, P41, P11, D3, P31, P59, D5, P17, P53, P15, P27, P9, P57, D1, P63, P29, P39, P47, P37, P49, P43, P25, P19, P55, P33, D7, P61	27
2L	528489	C	G	germline_recurrent	P35, P41, P11, P5, D3, P31, P17, P15, P9, D1, P63, P29, P47, P37, P43, P19, P45a, P33, D7, P61	20
2L	528562	C	A	germline_recurrent	P35, P41, P11, P5, D3, P31, D5, P17, P15, P9, P1, D1, P63, P29, P47, P51, P37, P43, P19, P33, D7	21
2L	528575	A	T	germline_recurrent	P35, P41, P11, P5, D3, P31, P59, P17, P15, P9, P1, P57, D1, P63, P29, P47, P51, P37, P19, D7, P61	21
2L	528911	C	G	germline_recurrent	P35, P41, P11, D3, P65, P31, P59, D5, P17, P53, P15, P27, P9, P57, D1, P63, P29, P47, P23, P37, P49, P43, P25, P19, P45a, P33, D7, P61	28
2L	529157	T	C	germline_recurrent	P35, P41, P11, P5, P65, P31, P59, D5, P17, P53, P15, P27, P9, P57, P63, P29, P47, P37, P49, P43, P19, P45a, P33, D7, P61	25
2L	529444	G	A	germline_recurrent	P35, P41, P11, P5, D3, P65, P31, P59, D5, P17, P53, P15, P27, P9, P57, D1, P63, P29, P39, P47, P51, P37, P7, P49, P43, P25, P19, P45a, P55, P33, D7, P61	32
2L	529473	A	T	germline_recurrent	P35, P41, P11, D3, P65, P31, P59, P17, P53, P15, P27, P9, P57, D1, P63, P29, P39, P47, P23, P51, P37, P49, P43, P25, P19, P45a, P55, P33, P61	29
2L	529476	A	G	germline_recurrent	P35, P41, P11, P5, D3, P65, P31, P59, D5, P17, P53, P15, P27, P9, P57, D1, P63, P29, P39, P47, P23, P51, P37, P49, P43, P25, P19, P45a, P55, P33, D7, P61	32
2L	529663	A	C	germline_recurrent	P35, P41, P11, P65, P31, P59, P17, P53, P15, P27, P9, P57, P63, P29, P39, P47, P23, P51, P37, P7, P49, P43, P25, P19, P45a, P55, P33, P61	28
2L	529821	A	G	germline_recurrent	P35, P41, P11, P5, D3, P65, P31, P59, D5, P17, P53, P15, P27, P9, P57, D1, P63, P29, P39, P47, P23, P51, P37, P7, P49, P43, P25, P19, P45a, P55, P33, D7, P61	33
2L	529844	T	C	germline_recurrent	P35, P41, P11, P5, D3, P65, P31, P59, D5, P17, P53, P15, P27, P9, P57, D1, P63, P29, P39, P47, P23, P51, P37, P7, P49, P43, P25, P19, P45a, P55, P33, D7, P61	33
2L	529943	T	G	germline_recurrent	P35, P41, P11, P5, D3, P65, P31, P59, D5, P53, P15, P27, P9, P57, D1, P63, P29, P39, P47, P51, P37, P7, P49, P43, P25, P19, P45a, P55, P33, D7, P61	31
2L	529999	C	T	germline_recurrent	P35, P41, P11, D3, P65, P31, P59, D5, P17, P53, P15, P27, P9, P57, D1, P63, P29, P39, P47, P51, P37, P7, P49, P43, P25, P19, P45a, P55, P33, D7, P61	31
2L	530029	T	G	germline_recurrent	P35, P41, P11, D3, P65, P31, P59, D5, P17, P53, P15, P27, P9, P57, D1, P63, P29, P39, P51, P37, P7, P49, P43, P25, P19, P45a, P55, P33, D7, P61	30
2L	530123	C	T	germline_recurrent	P35, P41, P11, P5, D3, P65, P31, P59, D5, P17, P53, P15, P27, P9, P57, D1, P63, P29, P39, P47, P51, P37, P7, P49, P43, P25, P19, P45a, P55, P33, D7, P61	32
2L	530354	C	T	germline_recurrent	P35, P41, P11, D3, P65, P31, P59, D5, P17, P53, P15, P27, P9, P57, D1, P63, P29, P39, P47, P23, P51, P37, P7, P49, P43, P25, P19, P45a, P55, P33, D7, P61	32
2L	530374	C	A	germline_recurrent	P35, P41, P11, D3, P65, P31, P59, D5, P53, P15, P27, P9, P57, D1, P63, P29, P39, P47, P23, P51, P37, P49, P43, P25, P19, P45a, P55, P33, D7, P61	30
2L	530476	T	C	germline_recurrent	P35, P41, P11, D3, P65, P31, P59, D5, P17, P53, P15, P27, P9, P57, D1, P63, P29, P39, P47, P23, P51, P37, P7, P49, P43, P25, P19, P55, P33, D7, P61	31
2L	530615	G	T	germline_recurrent	P35, P41, P11, D3, P65, P31, P59, D5, P53, P15, P27, P9, P57, D1, P63, P29, P3, P47, P23, P51, P37, P7, P49, P43, P25, P19, P45a, P55, P33, D7, P61	31
2L	530772	A	G	germline_recurrent	P35, P41, P11, P5, D3, P65, P31, P59, D5, P53, P15, P27, P9, P57, D1, P63, P29, P47, P23, P51, P37, P7, P49, P43, P25, P19, P45a, P55, P33, D7, P61	31
2L	530785	A	T	germline_recurrent	P35, P41, P11, P5, D3, P65, P31, P59, D5, P53, P15, P27, P9, P57, D1, P63, P29, P47, P23, P51, P37, P7, P49, P43, P25, P19, P45a, P55, P33, D7, P61	31
2L	530816	G	A	germline_recurrent	P35, P41, P11, P5, P65, P31, P59, P53, P15, P27, P9, P57, P63, P29, P39, P47, P23, P51, P37, P7, P49, P43, P25, P19, P45a, P55, P33, P61	28
2L	530887	A	G	germline_recurrent	P35, P41, P11, D3, P65, P31, P59, D5, P53, P15, P27, P9, P57, D1, P63, P29, P47, P23, P51, P37, P49, P43, P25, P19, P45a, P55, P33, D7, P61	29
2L	531223	G	A	germline_recurrent	P35, P41, P11, D3, P65, P31, P59, D5, P53, P15, P27, P9, P57, D1, P63, P29, P39, P47, P23, P37, P49, P43, P25, P19, P45a, P55, P33, D7, P61	29
2L	531260	T	G	germline_recurrent	P35, P41, P11, D3, P65, P31, P59, D5, P53, P15, P27, P9, P57, D1, P63, P29, P39, P47, P23, P51, P37, P7, P49, P43, P25, P19, P45a, P55, P33, D7, P61	31
2L	531280	C	G	germline_recurrent	P35, P41, P11, P65, P31, P59, D5, P53, P15, P27, P9, P57, P63, P29, P47, P23, P51, P37, P49, P43, P25, P19, P45a, P55, P33, D7, P61	27
2L	531453	G	A	germline_recurrent	P35, P41, P11, P5, D3, P65, P31, D5, P17, P53, P15, P27, P9, P57, D1, P63, P47, P23, P37, P7, P49, P43, P25, P19, P55, P33, D7, P61	28
2L	531863	G	C	germline_recurrent	P35, P41, P11, D3, P65, P31, P59, D5, P17, P53, P15, P27, P9, P57, D1, P63, P29, P23, P51, P37, P7, P49, P43, P25, P19, P45a, P55, P33, D7, P61	30
2L	531889	C	G	germline_recurrent	P35, P41, P11, D3, P65, P31, P59, D5, P17, P53, P15, P27, P9, P57, D1, P63, P29, P51, P37, P7, P49, P43, P25, P19, P55, P33, D7, P61	28
2L	532224	G	A	germline_recurrent	P35, P41, P11, D3, P65, P31, P59, P17, P53, P15, P27, P9, P57, D1, P63, P29, P39, P3, P47, P23, P37, P49, P43, P25, P19, P45a, P55, P33, D7, P61	30
2L	532254	A	G	germline_recurrent	P35, P41, P11, P5, D3, P65, P31, P59, D5, P17, P53, P15, P27, P9, P57, D1, P63, P29, P39, P3, P47, P23, P51, P37, P7, P49, P43, P25, P19, P45a, P55, P33, D7, P61	34
2L	532265	G	T	germline_recurrent	P35, P41, P11, P5, D3, P65, P31, P59, D5, P17, P53, P15, P27, P9, P57, D1, P63, P29, P39, P3, P47, P23, P37, P7, P49, P43, P25, P19, P45a, P55, P33, D7, P61	33
2L	532283	A	G	germline_recurrent	P35, P41, P11, P5, D3, P65, P31, P59, D5, P17, P53, P15, P27, P9, P57, D1, P63, P29, P39, P3, P47, P23, P37, P7, P49, P43, P25, P19, P45a, P55, P33, D7, P61	33
2L	532537	T	A	germline_recurrent	P35, P41, P11, P5, D3, P65, P31, P59, P17, P53, P15, P27, P9, P57, D1, P63, P29, P39, P3, P47, P23, P51, P37, P49, P43, P25, P19, P45a, P55, P33, P61	31
2L	532624	C	A	germline_recurrent	P35, P41, P11, P5, D3, P65, P31, P59, D5, P17, P53, P15, P27, P9, P57, D1, P63, P29, P3, P23, P51, P37, P7, P49, P43, P25, P19, P45a, P55, P33, D7, P61	32
2L	532668	A	G	germline_recurrent	P35, P41, P11, P5, P65, P31, P59, D5, P17, P53, P15, P27, P9, P57, P63, P29, P39, P23, P51, P37, P7, P49, P43, P25, P19, P45a, P55, P33, D7, P61	30
2L	532744	G	A	germline_recurrent	P35, P41, P11, P5, D3, P65, P31, P59, D5, P53, P15, P27, P9, P57, D1, P63, P29, P47, P23, P51, P37, P49, P43, P25, P19, P45a, P55, P33, D7, P61	30
2L	533185	G	A	germline_recurrent	P35, P41, P11, P5, D3, P65, P31, P59, D5, P53, P15, P27, P9, P57, D1, P63, P29, P23, P37, P49, P43, P25, P19, P55, P33, D7	26
2L	533376	A	G	germline_recurrent	P35, P41, P11, D3, P65, P31, P59, P17, P53, P15, P27, P9, P57, D1, P63, P29, P23, P37, P49, P43, P25, P19, P45a, P55, P33	25
2L	533383	A	C	germline_recurrent	P35, P41, P11, D3, P65, P31, P59, P17, P53, P15, P27, P9, P57, D1, P63, P29, P23, P37, P49, P43, P25, P19, P45a, P55, P33, P61	26
2L	533403	C	T	germline_recurrent	P35, P41, P11, D3, P65, P31, P59, D5, P17, P53, P15, P27, P9, P57, D1, P63, P29, P23, P37, P49, P43, P25, P19, P45a, P55, P33, D7, P61	28
2L	533426	C	T	germline_recurrent	P35, P41, P11, P5, D3, P65, P31, P59, D5, P17, P53, P15, P27, P9, P57, D1, P63, P29, P39, P23, P51, P37, P7, P49, P43, P25, P19, P45a, P55, P33, D7, P61	32
2L	533507	G	A	germline_recurrent	P35, P41, P11, D3, P65, P31, P59, D5, P17, P53, P15, P27, P9, P57, D1, P63, P29, P39, P23, P51, P37, P7, P49, P43, P25, P19, P45a, P55, P33, D7, P61	31
2L	533515	C	T	germline_recurrent	P35, P41, P11, D3, P65, P31, P59, P17, P53, P15, P27, P9, P57, D1, P63, P29, P39, P23, P51, P37, P7, P49, P43, P25, P19, P45a, P55, P33, P61	29
2L	533659	T	C	germline_recurrent	P35, P41, P11, P5, D3, P65, P31, D5, P17, P53, P15, P27, P9, P57, D1, P63, P29, P51, P37, P7, P49, P43, P25, P19, P45a, P55, P33, D7, P61	29
2L	533782	A	C	germline_recurrent	P35, P41, P11, P5, D3, P65, P31, P59, D5, P17, P53, P15, P27, P9, P57, D1, P63, P29, P47, P51, P37, P7, P49, P43, P25, P19, P45a, P55, P33, D7, P61	31
2L	533805	A	T	germline_recurrent	P35, P41, P11, P5, D3, P65, P31, P59, D5, P17, P53, P15, P27, P9, P57, D1, P63, P29, P39, P47, P51, P37, P7, P49, P43, P25, P19, P45a, P55, P33, D7, P61	32
2L	534014	C	T	germline_recurrent	P35, P41, P11, D3, P65, P31, P59, D5, P53, P15, P27, P9, P57, D1, P63, P29, P23, P37, P49, P43, P25, P19, P55, P33, D7	25
2L	534024	A	T	germline_recurrent	P35, P41, P11, D3, P65, P31, P59, D5, P53, P15, P27, P9, P57, D1, P63, P29, P23, P51, P37, P49, P43, P25, P19, P55, P33, D7	26
2L	534172	A	G	germline_recurrent	P35, P41, P11, P5, D3, P31, P59, D5, P17, P53, P15, P27, P9, P57, D1, P63, P29, P47, P51, P37, P49, P43, P19, P55, P33, D7	26
2L	534220	T	G	germline_recurrent	P35, P41, P11, P5, D3, P15, D1, P63, P29, P37	10
2L	534404	G	T	germline_recurrent	P35, P41, P11, D3, P65, P31, D5, P53, P15, P27, P9, P57, D1, P63, P29, P47, P23, P51, P37, P7, P49, P43, P25, P19, P55, P33, D7, P61	28
2L	534432	T	A	germline_recurrent	P35, P41, P11, D3, P65, P31, D5, P53, P15, P27, P9, P57, D1, P63, P29, P23, P51, P37, P43, P25, P19, P55, P33, D7, P61	25
2L	534462	C	T	germline_recurrent	P35, P41, P11, D3, P31, D5, P53, P15, P27, P9, P57, D1, P63, P29, P23, P51, P37, P49, P43, P25, P19, P55, P33, D7	24
2L	534468	T	C	germline_recurrent	P35, P41, P11, D3, P65, P31, D5, P53, P15, P27, P9, P57, D1, P63, P29, P23, P51, P37, P7, P49, P43, P25, P19, P55, P33, D7, P61	27
2L	534700	C	T	germline_recurrent	P35, P41, P11, P5, D3, P65, P31, P59, D5, P53, P15, P27, P9, P57, D1, P63, P29, P47, P23, P51, P37, P7, P49, P43, P25, P55, P33, D7, P61	29
2L	534848	G	A	germline_recurrent	P35, P41, P11, P65, P31, P53, P15, P27, P9, P57, P63, P29, P47, P23, P37, P49, P43, P25, P19, P55, P33	21
2L	534985	G	A	germline_recurrent	P35, P41, P11, D3, P65, P31, D5, P53, P15, P27, P9, P57, D1, P63, P29, P39, P23, P37, P49, P43, P19, P55, P33, D7	24
2L	535024	T	G	germline_recurrent	P35, P41, P11, D3, P65, P31, D5, P17, P53, P15, P27, P9, P57, D1, P63, P29, P39, P47, P23, P37, P49, P43, P25, P55, P33, D7, P61	27
2L	535033	C	A	germline_recurrent	P35, P41, P11, D3, P65, P31, D5, P17, P53, P15, P27, P9, P57, D1, P63, P29, P39, P47, P23, P37, P49, P43, P25, P19, P55, P33, D7, P61	28
2L	535038	A	G	germline_recurrent	P35, P41, P11, D3, P65, P31, D5, P17, P53, P15, P27, P9, P57, D1, P63, P29, P39, P47, P23, P51, P37, P49, P43, P25, P19, P55, P33, D7, P61	29
2L	535109	T	C	germline_recurrent	P35, P41, P11, P5, D3, P65, P31, P59, D5, P17, P53, P15, P27, P9, P57, D1, P63, P29, P39, P47, P23, P51, P37, P7, P49, P43, P25, P19, P55, P33, D7, P61	32
2L	535256	G	T	germline_recurrent	P35, P41, P11, P5, D3, P65, P31, P59, D5, P17, P53, P15, P27, P9, P57, D1, P63, P29, P39, P3, P47, P23, P51, P37, P7, P49, P43, P25, P19, P45a, P55, P33, D7, P61	34
2L	535830	T	A	germline_recurrent	P35, P41, P11, D3, P65, P31, D5, P17, P53, P15, P27, P9, P57, D1, P63, P29, P39, P47, P23, P51, P37, P7, P49, P43, P25, P19, P55, P33, D7, P61	30
2L	535969	A	G	germline_recurrent	P35, P41, P11, P5, D3, P65, P31, P59, P17, P53, P15, P27, P9, P1, P57, D1, P63, P29, P47, P37, P49, P43, P19, P55, P33, D7, P61	27
2L	536010	T	G	germline_recurrent	P35, P41, P11, P5, D3, P65, P31, P53, P15, P27, P9, P1, P57, D1, P63, P29, P47, P37, P49, P43, P19, P55, P33, D7, P61	25
2L	536430	G	A	germline_recurrent	P35, P41, P11, D3, P65, P31, P59, D5, P17, P53, P15, P27, P9, P57, D1, P63, P29, P51, P37, P49, P43, P25, P19, P55, P33, D7, P61	27
2L	536642	C	T	germline_recurrent	P35, P41, P11, D3, P65, P31, P59, D5, P53, P15, P27, P9, P57, D1, P63, P29, P39, P47, P51, P37, P7, P49, P43, P25, P19, P45a, P55, P33, D7, P61	30
2L	536744	A	G	germline_recurrent	P35, P41, P11, D3, P65, P31, P59, D5, P53, P15, P27, P9, P57, D1, P63, P29, P39, P47, P23, P51, P37, P7, P49, P43, P25, P19, P45a, P55, P33, D7, P61	31
2L	536751	A	G	germline_recurrent	P35, P41, P11, D3, P65, P31, P59, D5, P53, P15, P27, P9, P57, D1, P63, P29, P39, P47, P23, P51, P37, P7, P49, P43, P25, P19, P55, P33, D7, P61	30
2L	537216	A	T	germline_recurrent	P35, P41, P11, D3, P65, P31, D5, P17, P53, P15, P27, P9, P57, D1, P63, P29, P37, P7, P49, P25, P19, P33, D7	23
2L	537438	T	G	germline_recurrent	P35, P41, P11, P5, D3, P65, P31, P17, P53, P15, P27, P9, D1, P63, P29, P37, P7, P49, P43, P19, P33, D7	22
2L	537450	A	C	germline_recurrent	P35, P41, P11, D3, P65, P31, P17, P53, P15, P27, P9, D1, P63, P29, P3, P37, P7, P49, P43, P19, P33, D7	22
2L	537694	A	C	germline_recurrent	P35, P41, P11, P65, P31, P59, P53, P15, P27, P9, P57, P63, P29, P47, P23, P37, P7, P49, P43, P25, P19, P55, P33	23
2L	537748	A	C	germline_recurrent	P35, P41, P11, D3, P65, P31, P59, D5, P53, P15, P27, P9, P57, D1, P63, P29, P47, P51, P37, P49, P43, P25, P19, P45a, P55, P33, D7, P61	28
2L	537777	G	C	germline_recurrent	P35, P41, P11, D3, P65, P31, P59, D5, P53, P15, P27, P9, P57, D1, P63, P29, P39, P51, P37, P49, P43, P25, P19, P55, P33, D7, P61	27
2L	537905	C	T	germline_recurrent	P35, P41, P11, P5, D3, P65, P31, P59, D5, P17, P53, P15, P27, P9, P1, P57, D1, P63, P29, P47, P51, P37, P7, P49, P43, P25, P19, P45a, P55, P33, D7, P61	32
2L	537985	T	C	germline_recurrent	P35, P41, P11, D3, P65, P31, P59, D5, P53, P15, P27, P9, P57, D1, P63, P29, P51, P37, P49, P43, P25, P19, P45a, P55, P33, D7, P61	27
2L	538328	C	T	germline_recurrent	P35, P41, P11, P5, D3, D5, P53, P15, P27, P9, P57, D1, P63, P29, P39, P51, P37, P49, P43, P25, P19, P55, P33, D7	24
2L	538460	T	C	germline_recurrent	P35, P41, P11, D3, P65, P31, D5, P17, P53, P15, P27, P9, P57, D1, P63, P29, P39, P23, P51, P37, P49, P43, P25, P19, P45a, P55, P33, D7, P61	29
2L	538541	C	T	germline_recurrent	P35, P41, P11, D3, P65, P31, P59, D5, P17, P53, P15, P27, P9, P57, D1, P63, P29, P39, P23, P51, P37, P49, P43, P25, P19, P45a, P55, P33, D7, P61	30
2L	538601	G	A	germline_recurrent	P35, P41, P11, D3, P65, P31, D5, P17, P53, P15, P27, P9, P57, D1, P63, P29, P39, P23, P51, P37, P7, P49, P43, P25, P19, P55, P33, D7, P61	29
2L	538799	G	T	germline_recurrent	P35, P41, P11, D3, P65, P31, P59, D5, P53, P15, P27, P9, P57, D1, P63, P29, P39, P23, P51, P37, P49, P43, P25, P19, P45a, P55, P33, D7, P61	29
2L	539296	C	T	germline_recurrent	P35, P41, P11, D3, P65, P31, P59, D5, P53, P15, P27, P9, P57, D1, P63, P29, P39, P23, P51, P37, P7, P49, P43, P25, P19, P45a, P55, P33, D7, P61	30
2L	539304	T	C	germline_recurrent	P35, P41, P11, D3, P65, P31, P59, D5, P53, P15, P27, P9, P57, D1, P63, P29, P39, P23, P51, P37, P7, P49, P43, P25, P19, P45a, P55, P33, D7, P61	30
2L	539315	C	A	germline_recurrent	P35, P41, P11, D3, P65, P31, P59, D5, P53, P15, P27, P9, P57, D1, P63, P29, P39, P23, P51, P37, P7, P49, P43, P25, P19, P45a, P55, P33, D7, P61	30
2L	539351	C	T	germline_recurrent	P35, P41, P11, P5, D3, P65, P31, D5, P53, P15, P27, P9, P57, D1, P63, P29, P23, P51, P37, P7, P49, P43, P25, P19, P45a, P55, P33, D7, P61	29
2L	539448	C	G	germline_recurrent	P35, P41, P11, P5, D3, P65, P31, P59, D5, P17, P53, P15, P27, P9, P57, D1, P63, P29, P39, P23, P51, P37, P7, P49, P43, P25, P19, P45a, P55, P33, D7, P61	32
2L	539507	C	T	germline_recurrent	P35, P41, P11, D3, P65, P31, P59, D5, P17, P53, P15, P27, P9, P57, D1, P63, P29, P39, P47, P51, P37, P7, P49, P43, P25, P19, P55, P33, D7, P61	30
2L	539513	C	T	germline_recurrent	P35, P41, P11, D3, P65, P31, P59, D5, P17, P53, P15, P27, P9, P57, D1, P63, P29, P39, P3, P47, P23, P51, P37, P7, P49, P43, P25, P19, P45a, P55, P33, D7, P61	33
2L	539686	C	T	germline_recurrent	P35, P41, P11, P5, D3, P65, P31, P59, D5, P53, P15, P27, P9, P57, D1, P63, P29, P39, P3, P47, P23, P51, P37, P49, P43, P25, P19, P45a, P55, P33, D7, P61	32
2L	539692	C	T	germline_recurrent	P35, P41, P11, P5, D3, P65, P31, P59, D5, P53, P15, P27, P9, P57, D1, P63, P29, P39, P3, P47, P23, P51, P37, P49, P43, P25, P19, P45a, P55, P33, D7, P61	32
2L	539884	G	A	germline_recurrent	P35, P41, P11, D3, P65, P31, P59, P17, P53, P15, P27, P9, P57, D1, P63, P29, P39, P23, P51, P37, P7, P49, P43, P25, P19, P45a, P55, P33, P61	29
2L	539893	C	G	germline_recurrent	P35, P41, P11, D3, P65, P31, P59, D5, P17, P53, P15, P27, P9, P57, D1, P63, P29, P39, P23, P51, P37, P7, P49, P43, P25, P19, P45a, P55, P33, D7	30
2L	539902	C	T	germline_recurrent	P35, P41, P11, D3, P65, P31, P59, D5, P53, P15, P27, P9, P57, D1, P63, P29, P39, P23, P51, P37, P7, P49, P43, P25, P19, P55, P33, D7	28
2L	539936	C	T	germline_recurrent	P35, P41, P11, D3, P65, P31, P59, D5, P53, P15, P27, P9, P57, D1, P63, P29, P39, P47, P23, P51, P37, P7, P49, P43, P25, P19, P55, P33, D7	29
2L	539995	T	G	germline_recurrent	P35, P41, P11, D3, P65, P31, P53, P15, P27, P9, P57, D1, P63, P29, P47, P23, P51, P37, P7, P49, P43, P25, P19, P55, P33	25
2L	540010	G	A	germline_recurrent	P35, P41, P11, D3, P65, P31, P59, P53, P15, P27, P9, P57, D1, P63, P29, P47, P23, P51, P37, P49, P43, P25, P19, P55, P33, P61	26
2L	540097	C	A	germline_recurrent	P35, P41, P11, D3, P65, P31, P59, D5, P17, P53, P15, P27, P9, P57, D1, P63, P29, P47, P23, P51, P37, P7, P49, P43, P19, P55, P33, D7, P61	29
2L	540119	A	G	germline_recurrent	P35, P41, P11, D3, P65, P31, P59, D5, P17, P53, P15, P27, P9, P57, D1, P63, P29, P39, P47, P23, P51, P37, P7, P49, P43, P19, P55, P33, D7, P61	30
2L	540215	G	A	germline_recurrent	P35, P41, P11, P5, D3, P65, P31, D5, P17, P53, P15, P27, P9, P57, D1, P63, P29, P39, P47, P51, P37, P7, P49, P43, P19, P45a, P55, P33, D7, P61	30
2L	540622	A	G	germline_recurrent	P35, P41, P11, D3, P65, P31, D5, P17, P53, P15, P27, P9, P57, D1, P63, P29, P3, P47, P23, P37, P7, P49, P43, P19, P45a, P33, D7, P61	28
2L	540630	A	T	germline_recurrent	P35, P41, P11, D3, P65, P31, P59, D5, P17, P53, P15, P27, P9, P57, D1, P63, P29, P3, P47, P23, P37, P7, P49, P43, P19, P45a, P33, D7, P61	29
2L	540651	T	C	germline_recurrent	P35, P41, P11, D3, P65, P31, D5, P53, P15, P27, P9, P57, D1, P63, P29, P3, P47, P23, P37, P7, P43, P19, P45a, P33, D7	25
2L	540666	A	C	germline_recurrent	P35, P41, P11, D3, P65, P31, P59, D5, P53, P15, P27, P9, P57, D1, P63, P29, P47, P23, P37, P7, P49, P43, P25, P19, P45a, P33, D7	27
2L	540810	A	G	germline_recurrent	P35, P41, P11, D3, P65, P31, P59, P17, P53, P15, P27, P9, P1, P57, D1, P63, P29, P39, P47, P23, P51, P37, P7, P49, P43, P25, P19, P45a, P55, P33, P61	31
2L	540834	G	A	germline_recurrent	P35, P41, P11, D3, P65, P31, P59, P17, P53, P15, P27, P9, P1, P57, D1, P63, P29, P39, P47, P23, P51, P37, P7, P49, P43, P25, P19, P45a, P55, P33, P61	31
2L	540861	C	T	germline_recurrent	P35, P41, P11, D3, P65, P31, P59, D5, P17, P53, P15, P27, P9, P1, P57, D1, P63, P29, P39, P47, P23, P51, P37, P7, P49, P43, P25, P19, P45a, P55, P33, D7, P61	33
2L	540873	T	C	germline_recurrent	P35, P41, P11, D3, P65, P31, P59, D5, P17, P53, P15, P27, P9, P57, D1, P63, P29, P39, P47, P23, P51, P37, P7, P49, P43, P25, P19, P45a, P55, P33, D7, P61	32
2L	540879	T	C	germline_recurrent	P35, P41, P11, D3, P65, P31, P59, D5, P17, P53, P15, P27, P9, P1, P57, D1, P63, P29, P39, P47, P23, P51, P37, P7, P49, P43, P25, P19, P45a, P55, P33, D7, P61	33
2L	540894	T	A	germline_recurrent	P35, P41, P11, D3, P65, P31, P59, D5, P17, P53, P15, P27, P9, P1, P57, D1, P63, P29, P47, P23, P51, P37, P7, P49, P43, P25, P19, P45a, P55, P33, D7, P61	32
2L	541637	C	T	germline_recurrent	P35, P41, P11, D3, P65, P31, P59, P17, P53, P15, P27, P9, P57, D1, P63, P29, P47, P23, P51, P37, P7, P49, P43, P25, P19, P45a, P55, P33, P61	29
2L	541696	A	C	germline_recurrent	P35, P41, P11, P65, P31, P59, P17, P53, P15, P27, P9, P57, P63, P29, P23, P51, P37, P7, P49, P43, P25, P19, P55, P33, P61	25
2L	541774	A	G	germline_recurrent	P35, P41, P11, D3, P65, P31, P59, P17, P53, P15, P27, P9, P57, D1, P63, P29, P39, P23, P51, P37, P49, P43, P25, P19, P45a, P55, P33, P61	28
2L	541864	T	C	germline_recurrent	P35, P41, P11, D3, P65, P31, P59, P53, P15, P27, P9, P57, D1, P63, P29, P47, P23, P51, P37, P7, P49, P43, P25, P19, P45a, P55, P33, P61	28
2L	541936	G	A	germline_recurrent	P35, P41, P11, P5, D3, P65, P31, P59, D5, P53, P15, P27, P9, P57, D1, P63, P29, P23, P51, P37, P7, P49, P43, P25, P19, P45a, P55, P33, D7, P61	30
2L	542152	A	G	germline_recurrent	P35, P41, P11, P5, D3, P65, P31, P59, D5, P17, P53, P15, P27, P9, P57, D1, P63, P29, P47, P23, P51, P37, P49, P43, P25, P19, P45a, P55, P33, D7, P61	31
2L	542224	T	C	germline_recurrent	P35, P41, P11, D3, P65, P31, P59, D5, P53, P15, P27, P9, P57, D1, P63, P29, P23, P51, P37, P49, P43, P25, P19, P45a, P55, P33, D7, P61	28
2L	542268	T	G	germline_recurrent	P35, P41, P11, D3, P65, P31, P59, D5, P17, P53, P15, P27, P9, P1, P57, D1, P63, P29, P47, P23, P51, P37, P49, P43, P25, P19, P45a, P55, P33, D7, P61	31
2L	542281	C	A	germline_recurrent	P35, P41, P11, D3, P65, P31, P59, D5, P53, P15, P27, P9, P57, D1, P63, P29, P47, P23, P51, P37, P49, P43, P25, P19, P45a, P55, P33, D7, P61	29
2L	542320	C	T	germline_recurrent	P35, P41, P11, D3, P65, P31, P59, D5, P17, P53, P15, P27, P9, P1, P57, D1, P63, P29, P39, P47, P51, P37, P49, P43, P25, P19, P45a, P55, P33, D7, P61	31
2L	542371	G	T	germline_recurrent	P35, P41, P11, P65, P31, P53, P15, P27, P9, P57, P63, P29, P47, P23, P37, P49, P43, P25, P19, P45a, P55, P33, P61	23
2L	542382	A	G	germline_recurrent	P35, P41, P11, P65, P31, P53, P15, P27, P9, P57, P63, P29, P47, P51, P37, P49, P43, P25, P19, P55, P33, P61	22
2L	542418	A	G	germline_recurrent	P35, P41, P11, D3, P65, P31, D5, P53, P15, P27, P9, P57, D1, P63, P29, P51, P37, P49, P43, P25, P19, P55, P33, D7, P61	25
2L	542563	G	A	germline_recurrent	P35, P41, P11, D3, P65, P31, D5, P53, P15, P27, P9, P57, D1, P63, P29, P47, P51, P37, P7, P49, P43, P25, P19, P33, D7, P61	26
2L	542615	G	T	germline_recurrent	P35, P41, P11, D3, P65, P31, P53, P15, P27, P9, P57, D1, P63, P29, P37, P49, P43, P19, P55, P33, D7	21
2L	542946	G	A	germline_recurrent	P35, P41, P11, P5, D3, P65, P31, P59, D5, P17, P53, P15, P27, P9, P1, P57, D1, P63, P29, P3, P47, P51, P37, P7, P49, P43, P19, P45a, P55, P33, D7, P61	32
2L	543002	G	C	germline_recurrent	P35, P41, P11, D3, P65, P31, P59, D5, P17, P53, P15, P27, P9, P1, P57, D1, P63, P29, P39, P3, P47, P51, P37, P7, P49, P43, P25, P19, P45a, P55, P33, D7, P61	33
2L	543661	T	C	germline_recurrent	P35, P41, P11, D3, P65, P31, P59, D5, P17, P53, P15, P27, P9, P57, D1, P63, P29, P39, P47, P23, P51, P37, P7, P49, P43, P25, P19, P55, P33, D7, P61	31
2L	543826	G	C	germline_recurrent	P35, P41, P11, D3, P65, P31, P59, D5, P53, P15, P27, P9, P57, D1, P63, P29, P39, P23, P51, P37, P7, P49, P43, P25, P19, P55, P33, D7, P61	29
2L	544231	T	C	germline_recurrent	P35, P41, P11, D3, P65, P31, P59, D5, P17, P53, P15, P27, P9, P57, D1, P63, P29, P39, P37, P7, P49, P43, P25, P19, P55, P33, D7, P61	28
2L	544286	C	G	germline_recurrent	P35, P41, P11, D3, P65, P31, P59, D5, P17, P53, P15, P27, P9, P57, D1, P63, P29, P51, P37, P7, P49, P43, P25, P19, P55, P33, D7, P61	28
2L	544325	T	C	germline_recurrent	P35, P41, P11, D3, P65, P31, P59, D5, P53, P15, P27, P9, P57, D1, P63, P29, P47, P51, P37, P7, P49, P43, P25, P19, P55, P33, D7, P61	28
2L	544683	G	A	germline_recurrent	P35, P41, P11, D3, P65, P31, D5, P53, P15, P27, P9, P57, D1, P63, P29, P47, P23, P51, P37, P7, P49, P43, P25, P19, P55, P33, D7, P61	28
2L	544701	A	G	germline_recurrent	P35, P41, P11, D3, P65, P31, P53, P15, P27, P9, P57, D1, P63, P29, P47, P23, P51, P37, P49, P43, P25, P19, P55, P33, D7, P61	26
2L	544770	C	G	germline_recurrent	P35, P41, P11, D3, P31, D5, P53, P15, P27, P9, P57, D1, P63, P29, P23, P37, P7, P49, P43, P25, P19, P55, P33, D7, P61	25
2L	544805	C	T	germline_recurrent	P35, P41, P11, D3, P31, P53, P15, P27, P9, P57, D1, P63, P29, P23, P37, P43, P25, P19, P33	19
2L	544825	T	A	germline_recurrent	P35, P41, P11, D3, P31, D5, P53, P15, P27, P9, P57, D1, P63, P29, P23, P37, P49, P43, P25, P19, P55, P33, D7	23
2L	544964	A	T	germline_recurrent	P35, P41, P11, D3, P31, P53, P15, P27, P9, P57, D1, P63, P29, P37, P49, P43, P19, P55, P33	19
2L	545044	C	G	germline_recurrent	P35, P41, P11, D3, P31, D5, P53, P15, P27, P9, P57, D1, P63, P29, P47, P37, P7, P49, P43, P25, P19, P55, P33, D7	24
2L	545122	A	G	germline_recurrent	P35, P41, P11, P5, D3, P65, P31, P53, P15, P27, P9, P57, D1, P63, P29, P23, P37, P7, P43, P25, P19, P33, D7	23
2L	545147	T	C	germline_recurrent	P35, P41, P11, P5, D3, P65, P31, P59, D5, P53, P15, P27, P9, P57, D1, P63, P29, P47, P37, P7, P49, P43, P25, P19, P55, P33, D7	27
2L	545222	G	A	germline_recurrent	P35, P41, P11, P5, D3, P65, P31, P59, D5, P53, P15, P27, P9, P57, D1, P63, P29, P47, P37, P7, P49, P43, P25, P19, P55, P33, D7, P61	28
2L	545318	C	T	germline_recurrent	P35, P41, P11, P5, D3, P65, P31, P59, D5, P53, P15, P27, P9, P57, D1, P63, P29, P47, P23, P51, P37, P7, P49, P43, P25, P19, P45a, P55, P33, D7, P61	31
2L	545494	A	G	germline_recurrent	P35, P41, P11, D3, P65, P31, P59, D5, P53, P15, P27, P9, P57, D1, P63, P29, P39, P47, P23, P51, P37, P7, P49, P43, P25, P19, P55, P33, D7, P61	30
2L	545511	A	G	germline_recurrent	P35, P41, P11, D3, P65, P31, P59, D5, P53, P15, P27, P9, P57, D1, P63, P29, P47, P23, P51, P37, P49, P43, P25, P19, P55, P33, D7, P61	28
2L	545603	G	T	germline_recurrent	P35, P41, P11, D3, P31, P53, P15, P27, P9, P57, D1, P63, P29, P47, P51, P37, P49, P43, P25, P19, P55, P33, P61	23
2L	545652	C	G	germline_recurrent	P35, P41, D3, P65, P31, D5, P53, P15, P27, P9, P57, D1, P63, P29, P37, P49, P43, P25, P19, P55, P33, D7, P61	23
2L	545799	C	A	germline_recurrent	P35, P41, P11, D3, P65, P31, P59, D5, P53, P15, P27, P9, P57, D1, P63, P29, P39, P51, P37, P7, P49, P43, P19, P45a, P55, P33, D7, P61	28
2L	546349	C	A	germline_recurrent	P35, P41, P11, D3, P65, P31, P59, D5, P17, P53, P15, P27, P9, P57, D1, P63, P29, P39, P47, P23, P51, P37, P7, P49, P43, P25, P19, P45a, P55, P33, D7, P61	32
2L	546452	T	A	germline_recurrent	P35, P41, P11, D3, P65, P31, P59, P53, P15, P27, P9, P57, D1, P63, P29, P39, P47, P23, P51, P37, P7, P49, P43, P25, P19, P45a, P55, P33, P61	29
2L	546684	T	C	germline_recurrent	P35, P41, P11, P5, D3, P65, P31, P59, D5, P53, P15, P27, P9, P57, D1, P63, P29, P39, P47, P23, P37, P7, P49, P43, P25, P19, P55, P33, D7, P61	30
2L	546734	C	T	germline_recurrent	P35, P41, P11, D3, P65, P31, P59, D5, P17, P53, P15, P27, P9, P57, D1, P63, P29, P39, P23, P51, P37, P7, P49, P43, P25, P19, P45a, P55, P33, D7, P61	31
2L	546761	G	A	germline_recurrent	P35, P41, P11, D3, P65, P31, P59, D5, P17, P53, P15, P27, P9, P57, D1, P63, P29, P39, P23, P51, P37, P7, P49, P43, P25, P19, P45a, P55, P33, D7, P61	31
2L	546887	G	A	germline_recurrent	P35, P41, P11, D3, P65, P31, P59, D5, P53, P15, P27, P9, P57, D1, P63, P29, P39, P47, P23, P51, P37, P7, P49, P43, P25, P19, P45a, P55, P33, D7, P61	31
2L	546973	C	G	germline_recurrent	P35, P41, P11, D3, P65, P31, P59, D5, P17, P53, P15, P27, P9, P57, D1, P63, P29, P39, P23, P51, P37, P7, P49, P43, P25, P19, P45a, P55, P33, D7, P61	31
2L	547269	C	T	germline_recurrent	P35, P41, P11, D3, P65, P31, D5, P53, P15, P27, P9, P57, D1, P63, P29, P51, P37, P49, P43, P25, P19, P55, P33, D7	24
2L	547328	T	C	germline_recurrent	P35, P41, P11, D3, P65, P31, D5, P53, P15, P27, P9, D1, P63, P29, P37, P49, P43, P25, P19, P55, P33, D7	22
2L	547759	A	G	germline_recurrent	P35, P41, P11, D3, P65, P31, D5, P53, P15, P27, P9, P57, D1, P63, P29, P23, P51, P37, P7, P49, P43, P25, P19, P55, P33, D7	26
2L	547786	C	A	germline_recurrent	P35, P41, P11, D3, P65, P31, D5, P53, P15, P27, P9, P57, D1, P63, P29, P39, P23, P51, P37, P7, P49, P43, P25, P19, P55, P33, D7, P61	28
2L	547816	T	G	germline_recurrent	P35, P41, P11, D3, P65, P31, D5, P53, P15, P27, P9, P57, D1, P63, P29, P39, P51, P37, P7, P49, P43, P25, P19, P55, P33, D7, P61	27
2L	547840	A	G	germline_recurrent	P35, P41, P11, D3, P65, P31, P59, D5, P17, P53, P15, P27, P9, P57, D1, P63, P29, P39, P23, P51, P37, P49, P43, P25, P19, P55, P33, D7, P61	29
2L	547931	T	G	germline_recurrent	P35, P41, P11, D3, P65, P31, P59, D5, P53, P15, P27, P9, P57, D1, P63, P29, P39, P47, P23, P51, P37, P7, P49, P43, P25, P19, P45a, P55, P33, D7, P61	31
2L	548067	C	T	germline_recurrent	P35, P41, P11, P5, D3, P65, P31, P59, D5, P53, P15, P27, P9, P57, D1, P63, P29, P23, P51, P37, P7, P49, P43, P25, P19, P55, P33, D7	28
2L	548426	C	T	germline_recurrent	P35, P41, P11, D3, P65, P31, D5, P53, P15, P27, P9, P57, D1, P63, P29, P23, P51, P37, P49, P43, P19, P33, D7	23
2L	548546	G	A	germline_recurrent	P35, P41, P11, P5, D3, P65, P31, D5, P53, P15, P27, P9, P57, D1, P63, P29, P51, P37, P49, P43, P19, P55, P33, D7, P61	25
2L	548619	G	A	germline_recurrent	P35, P41, P11, D3, P65, P31, P59, P17, P53, P15, P27, P9, P57, D1, P63, P29, P39, P51, P37, P7, P49, P43, P19, P55, P33, D7, P61	27
2L	548664	A	C	germline_recurrent	P35, P41, P11, D3, P65, P31, D5, P17, P53, P15, P27, P9, P57, D1, P63, P29, P39, P51, P37, P7, P49, P43, P25, P19, P45a, P55, P33, D7, P61	29
2L	548712	A	C	germline_recurrent	P35, P41, P11, D3, P65, P31, D5, P53, P15, P27, P9, P57, D1, P63, P29, P39, P23, P37, P7, P49, P43, P25, P19, P45a, P55, P33, D7, P61	28
2L	548772	T	C	germline_recurrent	P35, P41, P11, D3, P65, P31, D5, P53, P15, P27, P9, P57, D1, P63, P29, P23, P51, P37, P7, P49, P43, P25, P19, P55, P33, D7, P61	27
2L	548805	C	G	germline_recurrent	P35, P41, P11, D3, P65, P31, D5, P53, P15, P27, P9, P57, D1, P63, P29, P23, P51, P37, P7, P49, P43, P25, P19, P55, P33, D7, P61	27
2L	548890	T	A	germline_recurrent	P35, P41, P11, D3, P65, P31, D5, P53, P15, P27, P9, P57, D1, P63, P29, P39, P51, P37, P7, P49, P43, P19, P55, P33, D7	25
2L	548906	G	C	germline_recurrent	P35, P41, P11, D3, P65, P31, P59, D5, P53, P15, P27, P9, P57, D1, P63, P29, P39, P23, P51, P37, P7, P49, P43, P25, P19, P55, P33, D7	28
2L	548964	A	T	germline_recurrent	P35, P41, D3, P65, P31, D5, P53, P15, P27, P9, P57, D1, P63, P29, P23, P51, P37, P7, P49, P43, P19, P55, P33, D7, P61	25
2L	549030	G	A	germline_recurrent	P35, P41, P11, P5, D3, P65, P31, P59, D5, P53, P15, P27, P9, P57, D1, P63, P29, P39, P51, P37, P7, P49, P43, P19, P55, P33, D7, P61	28
2L	549060	G	A	germline_recurrent	P35, P41, P11, P5, D3, P65, P31, P59, P53, P15, P27, P9, P57, D1, P63, P29, P51, P37, P7, P49, P43, P19, P55, P33, P61	25
2L	549228	C	A	germline_recurrent	P35, P41, P11, D3, P65, P31, D5, P53, P15, P27, P9, P57, D1, P63, P29, P23, P51, P37, P7, P49, P43, P25, P19, P55, P33, D7, P61	27
2L	549245	A	G	germline_recurrent	P35, P41, P11, D3, P65, P31, P53, P15, P27, P9, P57, D1, P63, P29, P51, P37, P7, P49, P43, P25, P19, P55, P33, P61	24
2L	549324	C	A	germline_recurrent	P35, P41, P11, P31, P53, P15, P27, P9, P63, P29, P51, P37, P49, P43, P19, P33	16
2L	549339	C	T	germline_recurrent	P35, P41, P11, P5, D3, P65, P31, D5, P53, P15, P27, P9, P57, D1, P63, P29, P51, P37, P49, P43, P19, P33, D7	23
2L	549354	G	T	germline_recurrent	P35, P41, P11, P5, D3, P65, P31, D5, P53, P15, P27, P9, P57, D1, P63, P29, P37, P49, P43, P19, P33, D7	22
2L	549424	T	C	germline_recurrent	P35, P41, P11, P5, D3, P65, P31, P59, D5, P53, P15, P27, P9, P57, D1, P63, P29, P47, P51, P37, P7, P49, P43, P19, P45a, P55, P33, D7, P61	29
2L	549801	A	T	germline_recurrent	P35, P41, P11, P5, D3, P65, P31, D5, P17, P53, P15, P27, P9, P57, D1, P63, P29, P39, P3, P51, P37, P7, P49, P43, P25, P19, P45a, P55, P33, D7, P61	31
2L	549814	T	G	germline_recurrent	P35, P41, P11, P5, D3, P65, P31, D5, P53, P15, P27, P9, P57, D1, P63, P29, P39, P51, P37, P7, P49, P43, P25, P19, P45a, P55, P33, D7, P61	29
2L	549834	A	G	germline_recurrent	P35, P41, P11, P5, D3, P65, P31, D5, P53, P15, P27, P9, P57, D1, P63, P29, P39, P47, P23, P51, P37, P7, P49, P43, P25, P19, P45a, P55, P33, D7, P61	31
2L	549912	T	C	germline_recurrent	P35, P41, P11, D3, P65, P31, P59, P17, P53, P15, P27, P9, P1, P57, D1, P63, P29, P39, P47, P23, P51, P37, P7, P49, P43, P25, P19, P45a, P55, P33, P61	31
2L	550005	A	T	germline_recurrent	P35, P41, P11, P5, D3, P65, P31, P59, D5, P17, P53, P15, P27, P9, P57, D1, P63, P29, P39, P23, P51, P37, P7, P49, P43, P25, P19, P55, P33, D7, P61	31
2L	550013	T	G	germline_recurrent	P35, P41, P11, P5, D3, P65, P31, P59, D5, P17, P53, P15, P27, P9, P57, D1, P63, P29, P39, P23, P51, P37, P7, P49, P43, P19, P45a, P55, P33, D7, P61	31
2L	550059	G	A	germline_recurrent	P35, P41, P11, D3, P65, P31, P59, P53, P15, P27, P9, P57, D1, P63, P29, P39, P47, P23, P51, P37, P7, P49, P43, P25, P19, P55, P33, P61	28
2L	550165	A	G	germline_recurrent	P35, P41, P11, D3, P65, P31, P59, P53, P15, P27, P9, P57, D1, P63, P29, P39, P23, P51, P37, P7, P49, P43, P25, P19, P55, P33, P61	27
2L	550184	A	C	germline_recurrent	P35, P41, P11, D3, P65, P31, P59, D5, P53, P15, P27, P9, P57, D1, P63, P29, P39, P23, P51, P37, P7, P49, P43, P25, P19, P55, P33, D7, P61	29
2L	550325	G	T	germline_recurrent	P35, P41, P11, P5, D3, P31, P59, D5, P53, P15, P27, P9, P57, D1, P63, P29, P51, P37, P7, P49, P43, P25, P19, P55, P33, D7	26
2L	550660	A	G	germline_recurrent	P35, P41, P5, D3, P65, P31, D5, P53, P15, P27, P9, P57, D1, P63, P29, P37, P49, P43, P19, P55, P33, D7, P61	23
2L	550724	G	A	germline_recurrent	P35, P41, P11, D3, P65, P31, P53, P15, P27, P9, P57, D1, P63, P29, P23, P51, P37, P49, P43, P25, P19, P55, P33, P61	24
2L	550808	T	A	germline_recurrent	P35, P41, P11, P5, D3, P65, P31, D5, P53, P15, P27, P9, P57, D1, P63, P29, P39, P47, P23, P51, P37, P49, P43, P25, P19, P55, P33, D7, P61	29
2L	550974	T	A	germline_recurrent	P35, P41, P11, P65, P31, P59, P17, P53, P15, P27, P9, P57, P63, P29, P39, P3, P47, P23, P51, P37, P7, P49, P43, P25, P19, P45a, P55, P33, P61	29
2L	551125	C	T	germline_recurrent	P35, P41, P11, D3, P31, D5, P15, P27, P9, D1, P63, P29, P51, P37, P49, P19, P55, P33, D7	19
2L	551131	C	G	germline_recurrent	P35, P41, P11, D3, P65, P31, D5, P53, P15, P27, P9, P57, D1, P63, P29, P51, P37, P49, P43, P25, P19, P55, P33, D7	24
2L	551136	A	T	germline_recurrent	P35, P41, P11, D3, P65, P31, P53, P15, P27, P9, P57, D1, P63, P29, P51, P37, P49, P43, P25, P19, P55, P33, D7	23
2L	551145	C	T	germline_recurrent	P35, P41, P11, D3, P65, P31, P53, P15, P27, P9, P57, D1, P63, P29, P47, P51, P37, P7, P49, P43, P25, P19, P55, P33	24
2L	551207	G	A	germline_recurrent	P35, P41, P11, P65, P31, P59, P17, P53, P15, P27, P9, P57, P63, P29, P39, P47, P51, P37, P7, P49, P43, P25, P19, P45a, P55, P33, P61	27
2L	551255	T	G	germline_recurrent	P35, P41, P11, P5, P65, P31, P59, P17, P53, P15, P27, P9, P57, P63, P29, P39, P47, P37, P7, P49, P43, P25, P19, P55, P33, P61	26
2L	551441	C	T	germline_recurrent	P35, P41, P11, D3, P65, P31, P59, D5, P17, P53, P15, P27, P9, P57, D1, P63, P29, P23, P51, P37, P7, P49, P43, P19, P55, P33, D7, P61	28
2L	551672	T	C	germline_recurrent	P35, P41, P11, P65, P31, P59, P53, P15, P27, P9, P57, P63, P29, P47, P23, P51, P37, P7, P49, P43, P25, P19, P45a, P55, P33, P61	26
2L	551846	T	C	germline_recurrent	P35, P41, P11, P65, P31, P59, P17, P53, P15, P27, P9, P57, P63, P29, P51, P37, P7, P49, P43, P25, P19, P45a, P55, P33, P61	25
2L	551932	C	A	germline_recurrent	P35, P41, P11, P65, P31, P59, P17, P53, P15, P27, P9, P57, P63, P29, P37, P7, P49, P43, P19, P55, P33, P61	22
2L	552046	G	A	germline_recurrent	P35, P41, P11, P65, P31, P59, P53, P15, P27, P9, P57, P63, P29, P39, P47, P37, P49, P43, P19, P55, P33, P61	22
2L	552052	A	G	germline_recurrent	P35, P41, P11, P65, P31, P59, P53, P15, P27, P9, P57, P63, P29, P39, P47, P51, P37, P49, P43, P19, P45a, P55, P33, P61	24
2L	552107	C	T	germline_recurrent	P35, P41, P11, P65, P31, P59, P17, P53, P15, P27, P9, P57, P63, P29, P39, P47, P23, P51, P37, P49, P43, P25, P19, P45a, P55, P33, P61	27
2L	552140	A	G	germline_recurrent	P35, P41, P11, D3, P65, P31, P59, P17, P53, P15, P27, P9, P57, D1, P63, P29, P47, P23, P51, P37, P49, P43, P25, P19, P45a, P55, P33, P61	28
2L	552234	C	A	germline_recurrent	P35, P41, P11, P65, P31, P59, P17, P53, P15, P27, P9, P57, P63, P29, P39, P47, P23, P51, P37, P49, P43, P25, P19, P55, P33, P61	26
2L	552410	T	C	germline_recurrent	P35, P41, P11, P5, D3, P65, P31, P59, D5, P53, P15, P27, P9, P57, D1, P63, P29, P39, P47, P51, P37, P7, P49, P43, P25, P19, P45a, P55, P33, D7, P61	31
2L	552527	A	G	germline_recurrent	P35, P41, P11, D3, P65, P31, D5, P17, P53, P15, P27, P9, P57, D1, P63, P29, P47, P51, P37, P49, P43, P25, P19, P45a, P55, P33, D7, P61	28
2L	552528	T	C	germline_recurrent	P35, P41, P11, P65, P31, P17, P53, P15, P27, P9, P57, P63, P29, P47, P23, P51, P37, P49, P43, P25, P19, P45a, P55, P33, P61	25
2L	552659	C	T	germline_recurrent	P35, P41, P11, D3, P65, P31, P59, D5, P53, P15, P27, P9, P57, D1, P63, P29, P39, P47, P23, P51, P37, P7, P49, P43, P25, P19, P45a, P55, P33, D7, P61	31
2L	552661	G	A	germline_recurrent	P35, P41, P11, P65, P31, P59, P53, P15, P27, P9, P57, P63, P29, P39, P47, P23, P51, P37, P7, P49, P43, P25, P19, P45a, P55, P33, P61	27
2L	552909	C	T	germline_recurrent	P35, P41, P11, P65, P31, P59, P17, P53, P15, P27, P9, P57, P63, P29, P47, P23, P51, P37, P7, P49, P43, P25, P19, P55, P33	25
2L	553021	G	A	germline_recurrent	P35, P11, P5, D3, P31, P15, P9, D1, P63, P29, P47, P37, P49, P43, P19, P33, D7	17
2L	553148	C	A	germline_recurrent	P35, P41, P11, P65, P31, P17, P53, P15, P27, P9, P1, P57, P63, P29, P3, P47, P51, P37, P7, P49, P43, P19, P45a, P33, P61	25
2L	553155	T	C	germline_recurrent	P35, P41, P11, P65, P31, P17, P53, P15, P27, P9, P1, P57, P63, P29, P3, P47, P51, P37, P7, P49, P43, P19, P45a, P33, P61	25
2L	553166	A	G	germline_recurrent	P35, P41, P11, P65, P31, P17, P53, P15, P27, P9, P1, P57, P63, P29, P3, P47, P51, P37, P7, P49, P43, P19, P45a, P33, P61	25
2L	553261	T	A	germline_recurrent	P35, P41, P11, P5, D3, P65, P31, P59, D5, P17, P53, P15, P27, P9, P1, P57, D1, P63, P29, P39, P3, P47, P23, P51, P37, P7, P49, P43, P25, P19, P45a, P55, P33, D7, P61	35
2L	553376	C	T	germline_recurrent	P35, P41, P11, D3, P65, P31, D5, P17, P53, P15, P27, P9, P57, D1, P63, P29, P47, P23, P51, P37, P7, P49, P43, P25, P19, P55, P33, D7, P61	29
2L	553582	C	T	germline_recurrent	P35, P41, P11, P5, D3, P65, P31, D5, P17, P53, P15, P27, P9, P57, D1, P63, P29, P47, P51, P37, P49, P43, P19, P45a, P55, P33, D7, P61	28
2L	553613	G	C	germline_recurrent	P35, P41, P11, P5, D3, P65, P31, D5, P17, P53, P15, P27, P9, P57, D1, P63, P29, P47, P51, P37, P7, P49, P43, P19, P45a, P55, P33, D7, P61	29
2L	553626	G	A	germline_recurrent	P35, P41, P11, P65, P31, P17, P53, P15, P27, P9, P1, P57, P63, P29, P47, P37, P49, P43, P19, P45a, P55, P33	22
2L	553672	C	A	germline_recurrent	P35, P41, P11, P5, P65, P31, P59, P53, P15, P27, P9, P1, P57, P63, P29, P47, P37, P49, P43, P45a, P33	21
2L	553709	T	C	germline_recurrent	P35, P41, P11, P5, P65, P31, P59, P17, P53, P15, P27, P9, P1, P57, P63, P29, P39, P3, P47, P37, P49, P43, P19, P45a, P33	25
2L	553723	A	G	germline_recurrent	P35, P41, P11, P5, D3, P65, P31, P59, D5, P17, P53, P15, P27, P9, P1, P57, D1, P63, P29, P39, P47, P37, P49, P43, P19, P45a, P33, D7	28
2L	553744	G	A	germline_recurrent	P35, P41, P11, P5, P65, P31, P59, P17, P53, P15, P27, P9, P1, P57, P63, P29, P39, P47, P37, P49, P43, P19, P45a, P33	24
2L	553874	T	G	germline_recurrent	P35, P41, P11, P5, D3, P65, P31, P59, D5, P17, P53, P15, P27, P9, P57, D1, P63, P29, P3, P47, P23, P51, P37, P7, P49, P43, P25, P19, P45a, P55, P33, D7, P61	33
2L	553881	C	T	germline_recurrent	P35, P41, P11, P5, D3, P65, P31, P59, D5, P53, P15, P27, P9, P57, D1, P63, P29, P3, P47, P23, P51, P37, P7, P49, P43, P25, P19, P45a, P55, P33, D7, P61	32
2L	553891	G	T	germline_recurrent	P35, P41, P11, P5, D3, P65, P31, P59, D5, P53, P15, P27, P9, P57, D1, P63, P29, P3, P47, P23, P51, P37, P7, P49, P43, P25, P19, P45a, P55, P33, D7, P61	32
2L	553896	G	A	germline_recurrent	P35, P41, P11, P5, D3, P65, P31, P59, D5, P53, P15, P27, P9, P57, D1, P63, P29, P3, P47, P23, P51, P37, P7, P49, P43, P25, P19, P45a, P55, P33, D7, P61	32
2L	553909	G	T	germline_recurrent	P35, P41, P11, P5, D3, P65, P31, P59, D5, P17, P53, P15, P27, P9, P57, D1, P63, P29, P39, P47, P23, P51, P37, P7, P49, P43, P25, P19, P45a, P55, P33, D7, P61	33
2L	553955	G	T	germline_recurrent	P35, P41, P11, P5, P65, P31, P59, P17, P53, P15, P27, P9, P57, P63, P29, P39, P3, P47, P23, P51, P37, P7, P49, P43, P25, P19, P45a, P55, P33, P61	30
2L	554030	A	G	germline_recurrent	P35, P41, P11, P5, D3, P65, P31, P59, P53, P15, P27, P9, P57, D1, P63, P29, P47, P23, P51, P37, P7, P49, P43, P25, P19, P45a, P55, P33, P61	29
2L	554043	G	A	germline_recurrent	P35, P41, P11, P5, P65, P31, P59, P53, P15, P27, P9, P57, P63, P29, P39, P47, P23, P51, P37, P7, P49, P43, P25, P19, P45a, P55, P33, P61	28
2L	554099	C	T	germline_recurrent	P35, P41, P11, P65, P31, P59, P17, P53, P15, P27, P9, P57, P63, P29, P39, P47, P23, P51, P37, P49, P43, P25, P19, P45a, P55, P33, P61	27
2L	554118	C	T	germline_recurrent	P35, P41, P11, D3, P65, P31, P59, D5, P17, P53, P15, P27, P9, P57, D1, P63, P29, P39, P47, P23, P51, P37, P7, P49, P43, P25, P19, P45a, P55, P33, D7, P61	32
2L	554225	T	A	germline_recurrent	P35, P41, P11, P5, D3, P65, P31, P59, D5, P17, P53, P15, P27, P9, P1, P57, D1, P63, P29, P39, P47, P23, P51, P37, P49, P43, P25, P19, P45a, P55, P33, D7, P61	33
2L	554252	T	G	germline_recurrent	P35, P41, P11, P65, P31, P59, P17, P53, P15, P27, P9, P57, P63, P29, P39, P47, P23, P51, P37, P49, P43, P19, P45a, P55, P33, P61	26
2L	554293	G	T	germline_recurrent	P35, P41, P11, P5, D3, P65, P31, P59, D5, P17, P53, P15, P27, P9, P57, D1, P63, P29, P39, P47, P51, P37, P7, P49, P43, P19, P45a, P55, P33, D7, P61	31
2L	554315	C	G	germline_recurrent	P35, P41, P11, D3, P65, P31, P59, D5, P53, P15, P27, P9, P57, D1, P63, P29, P39, P47, P23, P51, P37, P7, P49, P43, P19, P45a, P55, P33, D7, P61	30
2L	554324	C	G	germline_recurrent	P35, P41, P11, D3, P65, P31, P59, D5, P53, P15, P27, P9, P57, D1, P63, P29, P39, P47, P23, P51, P37, P7, P49, P43, P25, P19, P45a, P55, P33, D7, P61	31
2L	554377	C	G	germline_recurrent	P35, P41, P11, D3, P65, P31, P59, D5, P17, P53, P15, P27, P9, P57, D1, P63, P29, P47, P23, P51, P37, P49, P43, P25, P19, P45a, P55, P33, D7, P61	30
2L	554406	A	G	germline_recurrent	P35, P41, P11, D3, P65, P31, P59, D5, P17, P53, P15, P27, P9, P1, P57, D1, P63, P29, P47, P23, P51, P37, P49, P43, P25, P19, P45a, P55, P33, D7, P61	31
2L	554421	C	T	germline_recurrent	P35, P41, P11, D3, P65, P31, P59, D5, P53, P15, P27, P9, P1, P57, D1, P63, P29, P47, P23, P51, P37, P49, P43, P25, P19, P45a, P55, P33, D7, P61	30
2L	554505	T	C	germline_recurrent	P35, P41, P11, D3, P65, P31, P59, P17, P53, P15, P27, P9, P57, D1, P63, P29, P39, P47, P23, P51, P37, P7, P49, P43, P25, P19, P45a, P55, P33, P61	30
2L	554520	A	G	germline_recurrent	P35, P41, P11, D3, P65, P31, P59, P17, P53, P15, P27, P9, P57, D1, P63, P29, P39, P47, P23, P51, P37, P7, P49, P43, P25, P19, P45a, P55, P33, P61	30
2L	554571	C	A	germline_recurrent	P35, P41, P11, D3, P65, P31, P59, P53, P15, P27, P9, P57, D1, P63, P29, P47, P23, P51, P37, P7, P49, P43, P25, P19, P45a, P55, P33, P61	28
2L	554712	A	T	germline_recurrent	P35, P41, P11, P65, P31, P59, P53, P15, P27, P9, P57, P63, P29, P47, P23, P51, P37, P49, P43, P25, P19, P45a, P55, P33, P61	25
2L	554745	A	G	germline_recurrent	P35, P41, P11, P5, P65, P31, P59, P53, P15, P27, P9, P57, P63, P29, P39, P47, P23, P51, P37, P49, P43, P25, P19, P45a, P55, P33, P61	27
2L	554754	G	T	germline_recurrent	P35, P41, P11, P65, P31, P59, P53, P15, P27, P9, P57, P63, P29, P39, P47, P23, P51, P37, P49, P43, P25, P19, P45a, P55, P33, P61	26
2L	554823	G	A	germline_recurrent	P35, P41, P11, D3, P65, P31, P59, P53, P15, P27, P9, P57, D1, P63, P29, P39, P23, P51, P37, P49, P43, P25, P19, P45a, P55, P33, P61	27
2L	554946	T	G	germline_recurrent	P35, P41, P11, P5, D3, P65, P31, P59, D5, P53, P15, P27, P9, P57, D1, P63, P29, P39, P47, P23, P51, P37, P49, P43, P25, P19, P45a, P55, P33, D7, P61	31
2L	555027	G	C	germline_recurrent	P35, P41, P11, P5, D3, P65, P31, P59, P53, P15, P27, P9, P57, D1, P63, P29, P39, P47, P23, P51, P37, P49, P43, P25, P19, P45a, P55, P33, P61	29
2L	555165	T	C	germline_recurrent	P35, P41, P11, D3, P65, P31, P59, D5, P53, P15, P27, P9, P57, D1, P63, P29, P39, P47, P51, P37, P49, P43, P25, P19, P45a, P55, P33, D7, P61	29
2L	555204	T	G	germline_recurrent	P35, P41, P11, D3, P65, P31, P59, D5, P17, P53, P15, P27, P9, P57, D1, P63, P29, P39, P47, P23, P51, P37, P7, P49, P43, P25, P19, P45a, P55, P33, D7, P61	32
2L	555210	G	A	germline_recurrent	P35, P41, P11, D3, P65, P31, P59, D5, P17, P53, P15, P27, P9, P57, D1, P63, P29, P39, P47, P51, P37, P7, P49, P43, P25, P19, P45a, P55, P33, D7, P61	31
2L	555473	T	A	germline_recurrent	P35, P41, P11, P5, P65, P31, P59, P17, P53, P15, P27, P9, P57, P63, P29, P39, P47, P23, P51, P37, P7, P49, P43, P25, P19, P45a, P55, P33, P61	29
2L	555876	A	T	germline_recurrent	P35, P41, P11, P65, P31, P59, P53, P15, P27, P9, P57, P63, P29, P39, P47, P23, P51, P37, P7, P49, P43, P25, P19, P55, P33, P61	26
2L	555960	C	G	germline_recurrent	P35, P41, P11, P65, P31, P59, P17, P53, P15, P27, P9, P57, P63, P29, P39, P47, P23, P51, P37, P7, P49, P43, P25, P19, P45a, P55, P33, P61	28
2L	555990	C	T	germline_recurrent	P35, P41, P11, D3, P65, P31, P59, D5, P17, P53, P15, P27, P9, P57, D1, P63, P29, P39, P47, P51, P37, P49, P43, P25, P19, P45a, P55, P33, D7, P61	30
2L	556140	G	A	germline_recurrent	P35, P41, P11, D3, P65, P31, P59, D5, P17, P53, P15, P27, P9, P57, D1, P63, P29, P39, P47, P51, P37, P7, P49, P43, P25, P19, P45a, P55, P33, D7, P61	31
2L	556148	G	A	germline_recurrent	P35, P41, P11, D3, P65, P31, P59, D5, P17, P53, P15, P27, P9, P57, D1, P63, P29, P39, P47, P51, P37, P7, P49, P43, P25, P19, P45a, P55, P33, D7, P61	31
2L	556188	G	C	germline_recurrent	P35, P41, P11, D3, P65, P31, P59, D5, P17, P53, P15, P27, P9, P57, D1, P63, P29, P39, P47, P51, P37, P7, P49, P43, P25, P19, P45a, P55, P33, D7, P61	31
2L	556275	T	C	germline_recurrent	P35, P41, P11, D3, P65, P31, P59, D5, P17, P53, P15, P27, P9, P57, D1, P63, P29, P39, P47, P23, P51, P37, P7, P49, P43, P25, P19, P45a, P55, P33, D7, P61	32
2L	556365	T	C	germline_recurrent	P35, P41, P11, P65, P31, P59, P53, P15, P27, P9, P57, P63, P29, P39, P23, P51, P37, P49, P43, P25, P19, P55, P33, P61	24
2L	556425	G	C	germline_recurrent	P35, P41, P11, P65, P31, P59, P53, P15, P27, P9, P57, P63, P29, P39, P23, P51, P37, P49, P43, P25, P19, P55, P33, P61	24
2L	556466	A	G	germline_recurrent	P35, P41, P11, D3, P65, P31, P59, D5, P17, P53, P15, P27, P9, P57, D1, P63, P29, P39, P47, P23, P51, P37, P49, P43, P25, P19, P45a, P55, P33, D7, P61	31
2L	556518	T	C	germline_recurrent	P35, P41, P11, P5, D3, P65, P31, P59, D5, P17, P53, P15, P27, P9, P57, D1, P63, P29, P39, P47, P23, P51, P37, P49, P43, P25, P19, P45a, P55, P33, D7, P61	32
2L	556557	A	T	germline_recurrent	P35, P41, P11, P5, P65, P31, P59, P53, P15, P27, P9, P57, P63, P29, P39, P47, P23, P51, P37, P49, P43, P25, P19, P45a, P55, P33, P61	27
2L	556579	C	T	germline_recurrent	P35, P41, P11, P5, D3, P65, P31, P59, D5, P53, P15, P27, P9, P57, D1, P63, P29, P39, P47, P23, P51, P37, P49, P43, P25, P19, P45a, P55, P33, D7, P61	31
2L	556857	A	C	germline_recurrent	P35, P41, P11, P5, D3, P65, P31, P59, D5, P53, P15, P27, P9, P57, D1, P63, P29, P39, P3, P47, P51, P37, P7, P49, P43, P25, P19, P45a, P55, P33, D7, P61	32
2L	556884	C	T	germline_recurrent	P35, P41, P11, P5, D3, P65, P31, P59, D5, P53, P15, P27, P9, P57, D1, P63, P29, P39, P3, P47, P51, P37, P7, P49, P43, P25, P19, P45a, P55, P33, D7, P61	32
2L	556950	A	G	germline_recurrent	P35, P41, P11, P5, D3, P65, P31, P59, D5, P17, P53, P15, P27, P9, P57, D1, P63, P29, P39, P23, P51, P37, P7, P49, P43, P25, P19, P45a, P55, P33, D7, P61	32
2L	556968	T	A	germline_recurrent	P35, P41, P11, P65, P31, P59, D5, P17, P53, P15, P27, P9, P57, P63, P29, P39, P51, P37, P7, P49, P43, P25, P19, P45a, P55, P33, D7, P61	28
2L	556998	G	A	germline_recurrent	P35, P41, P11, D3, P65, P31, P59, D5, P17, P53, P15, P27, P9, P57, D1, P63, P29, P39, P23, P51, P37, P7, P49, P43, P25, P19, P45a, P55, P33, D7, P61	31
2L	557040	T	C	germline_recurrent	P35, P41, P11, D3, P65, P31, P59, D5, P17, P53, P15, P27, P9, P57, D1, P63, P29, P39, P23, P51, P37, P7, P49, P43, P25, P19, P45a, P55, P33, D7, P61	31
2L	557067	C	T	germline_recurrent	P35, P41, P11, P65, P31, P59, P17, P53, P15, P27, P9, P57, P63, P29, P39, P47, P23, P51, P37, P49, P43, P25, P19, P45a, P55, P33, P61	27
2L	557268	T	A	germline_recurrent	P35, P41, P11, P65, P31, P59, P53, P15, P27, P9, P57, P63, P29, P39, P23, P51, P37, P49, P43, P25, P19, P55, P33, P61	24
2L	557286	T	C	germline_recurrent	P35, P41, P11, P65, P31, P59, P53, P15, P27, P9, P57, P63, P29, P39, P23, P51, P37, P7, P49, P43, P25, P19, P55, P33, P61	25
2L	557634	C	T	germline_recurrent	P35, P41, P11, P65, P31, P59, P17, P53, P15, P27, P9, P57, P63, P29, P39, P47, P23, P51, P37, P7, P49, P43, P25, P19, P45a, P55, P33, P61	28
2L	557694	A	T	germline_recurrent	P35, P41, P11, P65, P31, P59, P17, P53, P15, P27, P9, P57, P63, P29, P39, P47, P23, P51, P37, P7, P49, P43, P25, P19, P45a, P55, P33, P61	28
2L	557699	A	G	germline_recurrent	P35, P41, P11, D3, P65, P31, P59, D5, P17, P53, P15, P27, P9, P57, D1, P63, P29, P39, P47, P23, P51, P37, P7, P49, P43, P25, P19, P45a, P55, P33, D7, P61	32
2L	557774	G	T	germline_recurrent	P35, P41, P11, D3, P65, P31, D5, P17, P53, P15, P27, P9, P57, D1, P63, P29, P39, P3, P51, P37, P7, P49, P43, P25, P19, P45a, P55, P33, D7, P61	30
2L	557813	A	G	germline_recurrent	P35, P41, P11, P5, D3, P65, P31, P59, D5, P17, P53, P15, P27, P9, P57, D1, P63, P29, P39, P3, P47, P51, P37, P7, P49, P43, P25, P19, P45a, P55, P33, D7, P61	33
2L	557908	A	C	germline_recurrent	P35, P41, P11, D3, P65, P31, P17, P53, P15, P27, P9, P57, D1, P63, P29, P39, P3, P23, P51, P37, P7, P49, P43, P25, P19, P55, P33, P61	28
2L	557938	T	A	germline_recurrent	P35, P41, P11, D3, P65, P31, P59, D5, P17, P53, P15, P27, P9, P57, D1, P63, P29, P39, P23, P51, P37, P7, P49, P43, P25, P19, P45a, P55, P33, D7, P61	31
2L	557984	T	G	germline_recurrent	P35, P41, P11, D3, P65, P31, P59, D5, P17, P53, P15, P27, P9, P57, D1, P63, P29, P39, P23, P51, P37, P49, P43, P25, P19, P45a, P55, P33, D7, P61	30
2L	558065	G	A	germline_recurrent	P35, P41, P11, P5, D3, P65, P31, P59, D5, P17, P53, P15, P27, P9, P57, D1, P63, P29, P39, P23, P51, P37, P7, P49, P43, P25, P19, P45a, P55, P33, D7, P61	32
2L	558076	G	T	germline_recurrent	P35, P41, P11, D3, P65, P31, P59, D5, P53, P15, P27, P9, P57, D1, P63, P29, P39, P23, P51, P37, P7, P49, P43, P25, P19, P45a, P55, P33, D7	29
2L	558113	C	G	germline_recurrent	P35, P41, P11, P5, D3, P65, P31, P59, D5, P17, P53, P15, P27, P9, P57, D1, P63, P29, P39, P23, P51, P37, P7, P49, P43, P25, P19, P45a, P55, P33, D7, P61	32
2L	558197	C	A	germline_recurrent	P35, P41, P11, P5, D3, P65, P31, P59, D5, P17, P53, P15, P27, P9, P57, D1, P63, P29, P39, P47, P23, P51, P37, P49, P43, P25, P19, P45a, P55, P33, D7, P61	32
2L	558209	C	T	germline_recurrent	P35, P41, P11, P65, P31, P59, P17, P53, P15, P27, P9, P57, P63, P29, P39, P47, P23, P51, P37, P49, P43, P25, P19, P45a, P55, P33, P61	27
2L	558247	G	A	germline_recurrent	P35, P41, P11, P5, D3, P65, P31, P59, D5, P17, P53, P15, P27, P9, P57, D1, P63, P29, P39, P23, P51, P37, P49, P43, P25, P19, P45a, P55, P33, D7, P61	31
2L	558299	G	T	germline_recurrent	P35, P41, P11, P5, D3, P65, P31, P59, D5, P53, P15, P27, P9, P57, D1, P63, P29, P39, P23, P51, P37, P7, P49, P43, P25, P19, P45a, P55, P33, D7, P61	31
2L	558307	A	G	germline_recurrent	P35, P41, P11, P5, D3, P65, P31, P59, D5, P17, P53, P15, P27, P9, P57, D1, P63, P29, P39, P23, P51, P37, P7, P49, P43, P25, P19, P45a, P55, P33, D7, P61	32
2L	558334	G	T	germline_recurrent	P35, P41, P11, D3, P65, P31, P59, D5, P17, P53, P15, P27, P9, P57, D1, P63, P29, P39, P23, P51, P37, P7, P49, P43, P25, P19, P45a, P55, P33, D7, P61	31
2L	558389	C	T	germline_recurrent	P35, P41, P11, D3, P65, P31, P59, D5, P17, P53, P15, P27, P9, P57, D1, P63, P29, P23, P51, P37, P7, P49, P43, P25, P19, P45a, P55, P33, D7, P61	30
2L	558434	G	A	germline_recurrent	P35, P41, P11, P65, P31, P59, P53, P15, P27, P9, P57, P63, P29, P23, P51, P37, P7, P49, P43, P25, P19, P45a, P55, P33, P61	25
2L	558536	C	T	germline_recurrent	P35, P41, P11, P65, P31, P53, P15, P27, P9, P57, P63, P29, P51, P37, P49, P43, P19, P45a, P55, P33	20
2L	558545	C	A	germline_recurrent	P35, P41, P11, D3, P65, P31, P53, P15, P27, P9, P57, D1, P63, P29, P51, P37, P49, P43, P19, P55, P33	21
2L	558622	T	C	germline_recurrent	P35, P41, P11, D3, P65, P31, P59, D5, P53, P15, P27, P9, P57, D1, P63, P29, P39, P23, P51, P37, P49, P43, P19, P55, P33, D7, P61	27
2L	558664	G	A	germline_recurrent	P35, P41, P11, P5, D3, P65, P31, P59, D5, P53, P15, P27, P9, P57, D1, P63, P29, P39, P47, P23, P51, P37, P7, P49, P43, P25, P19, P55, P33, D7, P61	31
2L	558766	A	T	germline_recurrent	P35, P41, P11, P5, D3, P65, P31, D5, P53, P15, P27, P9, P57, D1, P63, P29, P39, P47, P23, P51, P37, P7, P49, P43, P25, P19, P45a, P55, P33, D7, P61	31
2L	558862	A	T	germline_recurrent	P35, P41, P11, P5, D3, P65, P31, P59, D5, P17, P53, P15, P27, P9, P57, D1, P63, P29, P39, P47, P51, P37, P7, P49, P43, P25, P19, P45a, P55, P33, D7, P61	32
2L	558909	T	A	germline_recurrent	P35, P41, P11, P5, D3, P65, P31, P59, D5, P53, P15, P27, P9, P57, D1, P63, P29, P39, P47, P51, P37, P7, P49, P43, P25, P19, P45a, P55, P33, D7, P61	31
2L	558927	C	T	germline_recurrent	P35, P41, P11, P5, D3, P65, P31, D5, P53, P15, P27, P9, P57, D1, P63, P29, P39, P47, P51, P37, P7, P49, P43, P25, P19, P45a, P55, P33, D7, P61	30
2L	558932	T	C	germline_recurrent	P35, P41, P11, P5, D3, P65, P31, D5, P53, P15, P27, P9, P57, D1, P63, P29, P39, P47, P51, P37, P7, P49, P43, P25, P19, P45a, P55, P33, D7, P61	30
2L	558966	A	C	germline_recurrent	P35, P41, P11, D3, P65, P31, D5, P17, P53, P15, P27, P9, P57, D1, P63, P29, P39, P47, P51, P37, P7, P49, P43, P25, P19, P55, P33, D7, P61	29
2L	559075	T	A	germline_recurrent	P35, P41, P11, P5, D3, P65, P31, P59, D5, P17, P53, P15, P27, P9, P57, D1, P63, P29, P3, P47, P23, P51, P37, P49, P43, P25, P19, P45a, P55, P33, D7, P61	32
2L	559080	A	C	germline_recurrent	P35, P41, P11, P5, D3, P65, P31, P59, D5, P53, P15, P27, P9, P57, D1, P63, P29, P3, P47, P23, P37, P49, P43, P19, P45a, P55, P33, D7, P61	29
2L	559086	C	G	germline_recurrent	P35, P41, P11, P65, P31, P59, P53, P15, P27, P9, P57, P63, P29, P3, P47, P23, P37, P49, P43, P19, P55, P33, P61	23
2L	559104	C	A	germline_recurrent	P35, P41, P11, P5, D3, P65, P31, D5, P17, P53, P15, P27, P9, P57, D1, P63, P29, P3, P23, P37, P49, P43, P19, P55, P33, D7, P61	27
2L	559123	T	A	germline_recurrent	P35, P41, P11, P5, D3, P65, P31, P59, D5, P17, P53, P15, P27, P9, P57, D1, P63, P29, P3, P47, P51, P37, P49, P43, P19, P55, P33, D7, P61	29
2L	559185	A	G	germline_recurrent	P35, P41, P11, P5, D3, P65, P31, P59, P17, P53, P15, P9, P57, D1, P63, P29, P47, P51, P37, P49, P43, P19, P55, P33, D7	25
2L	559204	G	T	germline_recurrent	P35, P41, P11, P5, D3, P65, P31, P15, P9, P57, D1, P63, P29, P47, P51, P37, P49, P43, P19, P33, D7	21
2L	559242	C	T	germline_recurrent	P35, P41, P11, P5, D3, P65, P31, P15, P9, P57, D1, P63, P29, P47, P51, P37, P49, P43, P19, P33, D7	21
2L	559375	A	T	germline_recurrent	P35, P41, P11, P5, D3, P31, D5, P17, P53, P15, P27, P9, P57, D1, P63, P29, P47, P51, P37, P7, P49, P43, P25, P19, P55, P33, D7	27
2L	559396	C	T	germline_recurrent	P35, P41, P11, P65, P31, P59, P17, P53, P15, P27, P9, P57, P63, P29, P47, P51, P37, P7, P49, P43, P19, P55, P33	23
2L	559410	A	G	germline_recurrent	P35, P41, P11, P65, P31, P59, P53, P15, P27, P9, P57, P63, P29, P51, P37, P49, P43, P25, P19, P55, P33	21
2L	559421	C	T	germline_recurrent	P35, P41, P11, P5, D3, P65, P31, P59, D5, P53, P15, P27, P9, P57, D1, P63, P29, P47, P51, P37, P49, P43, P25, P19, P45a, P55, P33, D7	28
2L	559429	G	A	germline_recurrent	P35, P41, P11, P65, P31, P59, P53, P15, P27, P9, P57, P63, P29, P47, P51, P37, P49, P43, P25, P19, P45a, P55, P33	23
2L	559444	T	A	germline_recurrent	P35, P41, P11, P5, D3, P65, P31, P59, D5, P53, P15, P27, P9, P57, D1, P63, P29, P47, P51, P37, P49, P43, P25, P19, P45a, P55, P33, D7	28
2L	559474	T	G	germline_recurrent	P35, P41, P11, P5, D3, P65, P31, P59, D5, P53, P15, P27, P9, P57, D1, P63, P29, P39, P47, P23, P51, P37, P49, P43, P25, P19, P45a, P55, P33, D7, P61	31
2L	559530	A	G	germline_recurrent	P35, P41, P11, D3, P65, P31, P59, D5, P17, P53, P15, P27, P9, P57, D1, P63, P29, P39, P47, P23, P51, P37, P7, P49, P43, P25, P19, P45a, P55, P33, D7, P61	32
2L	559599	T	A	germline_recurrent	P35, P41, P11, D3, P65, P31, P59, D5, P53, P15, P27, P9, P57, D1, P63, P29, P39, P47, P23, P51, P37, P7, P49, P43, P25, P19, P45a, P55, P33, D7, P61	31
2L	559887	G	C	germline_recurrent	P35, P41, P11, D3, P65, P31, P59, D5, P53, P15, P27, P9, P57, D1, P63, P29, P39, P47, P23, P51, P37, P7, P49, P43, P25, P19, P55, P33, D7, P61	30
2L	559920	T	C	germline_recurrent	P35, P41, P11, D3, P31, P59, D5, P53, P15, P27, P9, P57, D1, P63, P29, P39, P47, P23, P51, P37, P7, P49, P43, P25, P19, P55, P33, D7, P61	29
2L	559935	C	T	germline_recurrent	P35, P41, P11, P65, P31, P59, P53, P15, P27, P9, P57, P63, P29, P39, P47, P23, P51, P37, P49, P43, P25, P19, P55, P33, P61	25
2L	559948	G	A	germline_recurrent	P35, P41, P11, D3, P65, P31, P59, D5, P53, P15, P27, P9, P57, D1, P63, P29, P39, P47, P23, P51, P37, P7, P49, P43, P25, P19, P55, P33, D7, P61	30
2L	560040	G	A	germline_recurrent	P35, P41, P11, D3, P65, P31, P59, D5, P53, P15, P27, P9, P57, D1, P63, P29, P39, P47, P23, P51, P37, P7, P49, P43, P25, P19, P45a, P55, P33, D7, P61	31
2L	560070	T	C	germline_recurrent	P35, P41, P11, D3, P65, P31, P59, D5, P17, P53, P15, P27, P9, P57, D1, P63, P29, P39, P47, P51, P37, P7, P49, P43, P25, P19, P55, P33, D7, P61	30
2L	560083	G	A	germline_recurrent	P35, P41, P11, D3, P65, P31, P59, D5, P53, P15, P27, P9, P57, D1, P63, P29, P39, P47, P23, P51, P37, P7, P49, P43, P25, P19, P55, P33, D7, P61	30
2L	560114	T	C	germline_recurrent	P35, P41, P11, D3, P65, P31, P59, D5, P53, P15, P27, P9, P57, D1, P63, P29, P39, P47, P23, P51, P37, P7, P49, P43, P25, P19, P45a, P55, P33, D7, P61	31
2L	560806	C	A	germline_recurrent	P35, P41, P11, P5, D3, P65, P31, D5, P53, P15, P27, P9, P57, D1, P63, P29, P3, P51, P37, P7, P49, P43, P25, P19, P55, P33, D7, P61	28
2L	560817	A	G	germline_recurrent	P35, P41, P11, P5, D3, P65, P31, D5, P53, P15, P27, P9, P57, D1, P63, P29, P3, P37, P7, P49, P43, P25, P19, P33, D7, P61	26
2L	560886	C	G	germline_recurrent	P35, P41, P11, P5, D3, P65, P31, P59, D5, P17, P53, P15, P27, P9, D1, P63, P29, P37, P7, P49, P43, P19, P55, P33, D7	25
2L	560970	C	A	germline_recurrent	P35, P41, P11, D3, P65, P31, P59, D5, P53, P15, P27, P9, P57, D1, P63, P29, P23, P51, P37, P7, P49, P43, P25, P19, P55, P33, D7	27
2L	560987	T	G	germline_recurrent	P35, P41, P11, P5, D3, P65, P31, P59, D5, P53, P15, P27, P9, P57, D1, P63, P29, P23, P51, P37, P7, P49, P43, P25, P19, P45a, P55, P33, D7	29
2L	560997	T	C	germline_recurrent	P35, P41, P11, P5, D3, P65, P31, P59, D5, P53, P15, P27, P9, P57, D1, P63, P29, P23, P51, P37, P7, P49, P43, P25, P19, P55, P33, D7	28
2L	561013	T	C	germline_recurrent	P35, P41, P11, P65, P31, P59, P53, P15, P27, P9, P57, P63, P29, P23, P51, P37, P7, P49, P43, P25, P19, P55, P33, P61	24
2L	561038	G	T	germline_recurrent	P35, P41, P11, D3, P65, P31, P59, D5, P53, P15, P27, P9, P57, D1, P63, P29, P23, P51, P37, P7, P49, P43, P25, P19, P55, P33, D7, P61	28
2L	561121	C	A	germline_recurrent	P35, P41, P11, D3, P65, P31, P59, D5, P17, P53, P15, P27, P9, P57, D1, P63, P29, P23, P37, P7, P49, P43, P25, P19, P55, P33, D7, P61	28
2L	561139	T	G	germline_recurrent	P35, P41, P11, P65, P31, P59, P17, P53, P15, P27, P9, P57, P63, P29, P37, P7, P49, P43, P25, P19, P55, P33, P61	23
2L	561183	G	A	germline_recurrent	P35, P41, P11, P5, D3, P65, P31, P59, D5, P17, P53, P15, P27, P9, P57, D1, P63, P29, P23, P51, P37, P7, P49, P43, P25, P19, P55, P33, D7	29
2L	561337	C	T	germline_recurrent	P35, P41, P11, D3, P65, P31, D5, P17, P53, P15, P27, P9, P57, D1, P63, P29, P39, P23, P51, P37, P7, P49, P43, P19, P55, P33, D7, P61	28
2L	561406	T	C	germline_recurrent	P35, P41, P11, D3, P65, P31, D5, P17, P15, P27, P9, P57, D1, P63, P29, P23, P37, P7, P43, P25, P19, P55, P33, D7	24
2L	561505	T	C	germline_recurrent	P35, P41, P11, P65, P31, P59, P53, P15, P27, P9, P57, P63, P29, P39, P47, P23, P51, P37, P7, P49, P43, P25, P19, P55, P33, P61	26
2L	561561	G	T	germline_recurrent	P35, P41, D3, P31, P59, D5, P53, P15, P27, P9, P57, D1, P63, P29, P23, P51, P37, P49, P43, P19, P55, P33, D7	23
[truncated: 819,086+ more rows]
