# Supplementary material for: Evolution and genomic signatures of spontaneous somatic mutation in Drosophila intestinal stem cells
Source: HighWire-hosted journal article supplement (doi:10.1101/gr.268441.120), 2021-06-24
Supplement: Supplemental_table_S11.xlsx [file Supplemental_table_S11.xlsx]

## Sheet: Sheet 1
Supplemental Table S11				Annotated SNVs and Indels predicted to impact protein sequence
				Somatic SNV and Indel calls predicted to alter protein function. Sample name, genomic position, alteration, gene affected, and adjusted allele frequency are noted.
sample	chr	pos	ref	mut	gene	strand	ref_cod	mut_cod	ref3_cod	mut3_cod	aachange	ntchange	codonsub	impact	pid	af	fpkm	cell_fraction
D1	2L	10464537	G	T	RluA-1	-1	C	A	CCA	CAA	P536P	C1608A	CCC>CCA	Synonymous	FBpp0079630	0.226	0.3	0.452
D1	2L	13272360	CGCA	C	CG44085	1	.	.	.	.	.	702-704-delinframe	.	delinframe	FBpp0306886	0.0563	0	0.1126
D1	2L	19745327	G	A	CG10631	-1	C	T	ACA	ATA	H3099H	C9297T	CAC>CAT	Synonymous	FBpp0080856	0.213	0.9	0.426
D1	2R	10353818	G	C	CG46298	1	G	C	AGA	ACA	E101D	G303C	GAG>GAC	Missense	FBpp0401595	0.193	0	0.386
D1	3L	889186	CA	C	Usp10	1	.	.	.	.	.	2488-2488-delfrshift	.	delfrshift	FBpp0072486	0.0541	4.7	0.1082
D1	3R	19601283	G	A	CG7333	1	G	A	GGA	GAA	D163N	G487A	GAT>AAT	Missense	FBpp0113045	0.0702	0	0.1404
D3	2L	12105074	C	T	ThrRS	1	C	T	GCC	GTC	P204S	C610T	CCC>TCC	Missense	FBpp0079914	0	45.8	0
D3	2L	12105094	C	T	ThrRS	1	C	T	ACT	ATT	Y210Y	C630T	TAC>TAT	Synonymous	FBpp0079914	0	45.8	0
D3	2R	19094998	C	CA	Ir56a	-1	.	.	.	.	.	1081-1082-insfrshift	.	insfrshift	FBpp0085779	0.0737	0	0.1474
D3	3L	870559	C	A	CG12502	1	C	A	TCC	TAC	S727Y	C2180A	TCC>TAC	Missense	FBpp0289574	0.114	0.1	0.228
D3	3R	19190235	C	CAGT	CG31475	1	.	.	.	.	.	155-156-insfrshift	.	insfrshift	FBpp0304806	0.027	0	0.054
D3	3R	25170871	GA	G	lobo	-1	.	.	.	.	.	1672-1672-delfrshift	.	delfrshift	FBpp0110094	0.0265	0	0.053
D3	X	6658275	ACCC	A	Cdc7	1	.	.	.	.	.	1224-1226-delinframe	.	delinframe	FBpp0070911	0.107	4.3	0.107
D3	X	8563549	TAAC	T	Trf4-1	1	.	.	.	.	.	178-180-delinframe	.	delinframe	FBpp0304114	0.093	0.7	0.093
D3	X	15452063	C	T	Ahcy	1	C	T	TCG	TTG	I295I	C885T	ATC>ATT	Synonymous	FBpp0312000	0	76.6	0
D3	X	18006347	TTGC	T	CG12672	-1	.	.	.	.	.	1143-1145-delinframe	.	delinframe	FBpp0074313	0.103	0	0.103
D5	3L	9628213	CA	C	Or67b	-1	.	.	.	.	.	684-684-delfrshift	.	delfrshift	FBpp0076149	0.0685	0	0.137
D5	3L	16068297	G	A	Mbs	1	G	A	GGC	GAC	G740D	G2219A	GGC>GAC	Missense	FBpp0300535	0.0543	0.5	0.1086
D5	3R	9820919	G	GT	CG42857	-1	.	.	.	.	.	127-128-insfrshift	.	insfrshift	FBpp0292996	0.0952	0	0.1904
D5	3R	12012981	CA	C	GCC185	1	.	.	.	.	.	1930-1930-delfrshift	.	delfrshift	FBpp0112136	0.0562	1	0.1124
D5	3R	14152400	G	A	CG42500	-1	C	T	ACG	ATG	H51H	C153T	CAC>CAT	Synonymous	FBpp0289854	0.037	0	0.074
D5	X	10912787	GCAA	G	CG43901	1	.	.	.	.	.	3322-3324-delinframe	.	delinframe	FBpp0305151	0.0755	0	0.0755
D7	2L	3873199	GA	G	capu	-1	.	.	.	.	.	3787-3787-delfrshift	.	delfrshift	FBpp0288517	0.058	0.2	0.116
D7	2L	8380471	T	G	AlaRS	-1	A	C	GAC	GCC	R324R	A972C	CGA>CGC	Synonymous	FBpp0089366	0	44.5	0
D7	2L	12105074	C	T	ThrRS	1	C	T	GCC	GTC	P204S	C610T	CCC>TCC	Missense	FBpp0079914	0	45.8	0
D7	2L	12105094	C	T	ThrRS	1	C	T	ACT	ATT	Y210Y	C630T	TAC>TAT	Synonymous	FBpp0079914	0	45.8	0
D7	2L	13277108	CAAT	C	CG44085	1	.	.	.	.	.	2638-2640-delinframe	.	delinframe	FBpp0306886	0.125	0	0.25
D7	2R	14254195	G	A	Hsc70-5	-1	C	T	CCA	CTA	P393P	C1179T	CCC>CCT	Synonymous	FBpp0308990	0	53.4	0
D7	2R	14819130	GA	G	CG10202	-1	.	.	.	.	.	785-785-delfrshift	.	delfrshift	FBpp0086594	0.0794	0.2	0.1588
D7	2R	17134446	A	G	CG11400	1	A	G	AAA	AGA	K80R	A239G	AAA>AGA	Missense	FBpp0311625	0	0.9	0
D7	2R	17362131	CACA	C	mbl	1	.	.	.	.	.	1017-1019-delinframe	.	delinframe	FBpp0307871	0.174	0	0.348
D7	2R	20909908	CT	C	CG9235	1	.	.	.	.	.	154-154-delfrshift	.	delfrshift	FBpp0071446	0.058	0	0.116
D7	2R	22415270	GGT	G	qkr58E-1	-1	.	.	.	.	.	124-125-delfrshift	.	delfrshift	FBpp0071754	0.125	9.6	0.25
D7	3L	7831438	GC	G	Pdp1	-1	.	.	.	.	.	140-140-delfrshift	.	delfrshift	FBpp0076495	0	5.7	0
D7	3L	7831440	TGC	T	Pdp1	-1	.	.	.	.	.	137-138-delfrshift	.	delfrshift	FBpp0076495	0	5.7	0
D7	3L	11923834	G	A	SdhAL	-1	C	T	GCA	GTA	G286G	C858T	GGC>GGT	Synonymous	FBpp0075801	0	0	0
D7	3L	11923843	A	G	SdhAL	-1	T	C	ATC	ACC	H283H	T849C	CAT>CAC	Synonymous	FBpp0075801	0	0	0
D7	3L	11923846	A	G	SdhAL	-1	T	C	TTC	TCC	F282F	T846C	TTT>TTC	Synonymous	FBpp0075801	0	0	0
D7	3L	18998765	TC	T	CG3808	-1	.	.	.	.	.	1605-1605-delfrshift	.	delfrshift	FBpp0074808	0.0606	1.9	0.1212
D7	3L	20783413	GA	G	CG11399	-1	.	.	.	.	.	1194-1194-delfrshift	.	delfrshift	FBpp0077935	0.0471	2	0.0942
D7	3L	23716500	CA	C	CG17454	1	.	.	.	.	.	590-590-delfrshift	.	delfrshift	FBpp0289146	0.0943	14.1	0.1886
D7	3R	15136234	CTGT	C	CG6912	-1	.	.	.	.	.	370-372-delinframe	.	delinframe	FBpp0082497	0.0714	83.3	0.1428
D7	3R	15351670	TC	T	CG5038	1	.	.	.	.	.	321-321-delfrshift	.	delfrshift	FBpp0082545	0.0769	0.8	0.1538
D7	3R	29802108	C	T	CG7834	-1	G	A	AGA	AAA	K201K	G603A	AAG>AAA	Synonymous	FBpp0084901	0	37.3	0
D7	X	8250893	G	A	ND-75	-1	C	T	TCT	TTT	I140I	C420T	ATC>ATT	Synonymous	FBpp0071128	0	13.7	0
D7	X	8250896	G	A	ND-75	-1	C	T	CCA	CTA	P139P	C417T	CCC>CCT	Synonymous	FBpp0071128	0	13.7	0
D7	X	9084033	GC	G	APC4	1	.	.	.	.	.	791-791-delfrshift	.	delfrshift	FBpp0071222	0.1	0.2	0.1
D7	X	11156770	TC	T	CG32668	-1	.	.	.	.	.	2581-2581-delfrshift	.	delfrshift	FBpp0073325	0.188	0	0.188
D7	X	13653469	GCAA	G	NFAT	1	.	.	.	.	.	1377-1379-delinframe	.	delinframe	FBpp0111893	0.103	1	0.103
D7	X	18659255	T	TAC	fu	1	.	.	.	.	.	1343-1344-insfrshift	.	insfrshift	FBpp0074373	0.08	1	0.08
P1	2L	4938441	T	G	Sgs1	1	T	G	CTT	CGT	T312T	T936G	ACT>ACG	Synonymous	FBpp0077084	0.333	0	0.666
P1	2R	8347571	CG	C	pdm3	1	.	.	.	.	.	34-34-delfrshift	.	delfrshift	FBpp0308446	0.25	0.2	0.5
P1	2R	15270720	G	A	Trpm	-1	C	T	ACG	ATG	T1019M	C3056T	ACG>ATG	Missense	FBpp0308223	0.273	0	0.546
P1	2R	18099005	GA	G	CG5098	1	.	.	.	.	.	2854-2854-delfrshift	.	delfrshift	FBpp0112005	0.2	0.3	0.4
P1	2R	22747475	C	T	CG42260	-1	G	A	TGC	TAC	V837V	G2511A	GTG>GTA	Synonymous	FBpp0288847	0.25	0	0.5
P1	2R	23318709	G	A	CG30412	-1	C	T	CCT	CTT	L187L	C559T	CTG>TTG	Synonymous	FBpp0071952	0.273	0	0.546
P1	3L	12423032	TTGC	T	toe	-1	.	.	.	.	.	1520-1522-delinframe	.	delinframe	FBpp0075712	0.231	0.5	0.462
P1	3R	7184724	C	T	CG10055	-1	G	A	GGG	GAG	G566E	G1697A	GGG>GAG	Missense	FBpp0081123	0.381	5	0.762
P1	3R	13098939	A	G	timeout	1	A	G	CAA	CGA	K423E	A1267G	AAG>GAG	Missense	FBpp0082180	0.273	2.7	0.546
P1	3R	19405835	C	T	CG5316	1	C	T	ACA	ATA	Q608*	C1822T	CAA>TAA	Nonsense	FBpp0083174	0.182	1.3	0.364
P1	3R	21523590	C	T	CG7956	1	C	T	TCA	TTA	I257I	C771T	ATC>ATT	Synonymous	FBpp0306725	0.444	0.3	0.888
P1	X	5879109	C	T	Usp30	-1	G	A	CGC	CAC	R99H	G296A	CGC>CAC	Missense	FBpp0070793	1	8.3	1
P11	2L	2652281	GT	G	CG33125	-1	.	.	.	.	.	10-10-delfrshift	.	delfrshift	FBpp0291644	0.0492	0	0.0984
P11	2L	15334684	C	G	esg	1	C	G	TCC	TGC	I197M	C591G	ATC>ATG	Missense	FBpp0080293	0.278	168.9	0.556
P11	2R	9086670	GT	G	CG13742	-1	.	.	.	.	.	666-666-delfrshift	.	delfrshift	FBpp0301832	0.0645	0	0.129
P11	2R	20639783	CG	C	rig	-1	.	.	.	.	.	798-798-delfrshift	.	delfrshift	FBpp0085564	0.114	4.6	0.228
P11	3L	1942626	C	A	Mfap1	1	C	A	CCC	CAC	P443H	C1328A	CCC>CAC	Missense	FBpp0072720	0.312	3.7	0.624
P11	3R	26619387	A	C	TwdlM	1	A	C	GAG	GCG	G48G	A144C	GGA>GGC	Synonymous	FBpp0084401	0.216	0	0.432
P11	3R	26619402	A	C	TwdlM	1	A	C	GAG	GCG	G53G	A159C	GGA>GGC	Synonymous	FBpp0084401	0.273	0	0.546
P11	X	256252	GA	G	cin	1	.	.	.	.	.	404-404-delfrshift	.	delfrshift	FBpp0070064	0.13	0	0.13
P11	X	15582723	AAGC	A	CG9215	-1	.	.	.	.	.	43-45-delinframe	.	delinframe	FBpp0073882	0.105	6.1	0.105
P11	X	15883237	ATGC	A	tay	-1	.	.	.	.	.	2522-2524-delinframe	.	delinframe	FBpp0301767	0.107	0.5	0.107
P15	2L	561795	T	G	CG11835	-1	A	C	AAA	ACA	K463Q	A1387C	AAG>CAG	Missense	FBpp0311648	0.151	0.5	0.302
P15	2L	4642172	C	T	BG642163	1	C	T	CCA	CTA	Q268*	C802T	CAA>TAA	Nonsense	FBpp0110065	0.265	0	0.53
P15	2L	14380351	A	T	ppk	-1	T	A	CTC	CAC	A181A	T543A	GCT>GCA	Synonymous	FBpp0080210	0.184	0.2	0.368
P15	3L	2794027	T	C	Tet	-1	A	G	AAC	AGC	Q1210Q	A3630G	CAA>CAG	Synonymous	FBpp0306013	0.2	2.2	0.4
P15	X	5432326	T	C	CG15784	1	T	C	ATG	ACG	H549H	T1647C	CAT>CAC	Synonymous	FBpp0070743	0.182	876.2	0.182
P17	2L	5885285	G	C	CG43185	1	G	C	TGA	TCA	L17F	G51C	TTG>TTC	Missense	FBpp0310924	0.423	1.6	0.846
P17	2L	5885286	A	T	CG43185	1	A	T	GAC	GTC	T18S	A52T	ACC>TCC	Missense	FBpp0310924	0.4	1.6	0.8
P17	3L	4642796	T	G	axo	-1	A	C	GAC	GCC	T2002P	A6004C	ACG>CCG	Missense	FBpp0297315	0.2	0	0.4
P17	3L	4642797	C	T	axo	-1	G	A	AGA	AAA	E2001E	G6003A	GAG>GAA	Synonymous	FBpp0297315	0.176	0	0.352
P17	3L	18201943	TC	T	CG7320	1	.	.	.	.	.	319-319-delfrshift	.	delfrshift	FBpp0301841	0.13	0.2	0.26
P17	3L	21263476	A	T	Eip78C	1	A	T	CAG	CTG	Q592L	A1775T	CAG>CTG	Missense	FBpp0297288	0.102	0.1	0.204
P17	3R	16071078	TCAACA	T	Mhcl	-1	.	.	.	.	.	5334-5338-delfrshift	.	delfrshift	FBpp0082685	0	1.5	0
P17	3R	16071084	C	CGTGTT	Mhcl	-1	.	.	.	.	.	5333-5334-insfrshift	.	insfrshift	FBpp0082685	0	1.5	0
P17	3R	25263347	G	A	GlnRS	-1	C	T	GCA	GTA	G776G	C2328T	GGC>GGT	Synonymous	FBpp0084240	0.397	32.4	0.794
P19	2L	4453458	TCTG	T	CG15440	-1	.	.	.	.	.	841-843-delinframe	.	delinframe	FBpp0077144	0.108	7.3	0.216
P19	2L	5359898	AT	A	nompC	1	.	.	.	.	.	3959-3959-delfrshift	.	delfrshift	FBpp0312558	0.0536	0	0.1072
P19	2L	9652285	C	CG	Apoltp	1	.	.	.	.	.	9754-9755-insfrshift	.	insfrshift	FBpp0292877	0.0909	0	0.1818
P19	2L	10679097	A	G	CG17104	1	A	G	AAG	AGG	E364E	A1092G	GAA>GAG	Synonymous	FBpp0311163	0.2	0.6	0.4
P19	2L	15068747	G	C	solo	1	G	C	AGA	ACA	E97Q	G289C	GAA>CAA	Missense	FBpp0401449	0.162	8.1	0.324
P19	2L	15068747	G	C	vas	1	G	C	AGA	ACA	E97Q	G289C	GAA>CAA	Missense	FBpp0401446	0.162	8.1	0.324
P19	2L	15068757	T	C	solo	1	T	C	TTC	TCC	F100S	T299C	TTC>TCC	Missense	FBpp0401449	0.19	8.1	0.38
P19	2L	15068757	T	C	vas	1	T	C	TTC	TCC	F100S	T299C	TTC>TCC	Missense	FBpp0401446	0.19	8.1	0.38
P19	2R	12671499	C	A	GLS	-1	G	T	AGG	ATG	G669C	G2005T	GGT>TGT	Missense	FBpp0292103	0.238	2.4	0.476
P19	2R	17495686	TA	T	CG30103	1	.	.	.	.	.	1631-1631-delfrshift	.	delfrshift	FBpp0086085	0.0755	0	0.151
P19	2R	20272561	C	CG	CG10444	-1	.	.	.	.	.	1621-1622-insfrshift	.	insfrshift	FBpp0085617	0.0769	8.1	0.1538
P19	2R	22812410	AT	A	stl	1	.	.	.	.	.	509-509-delfrshift	.	delfrshift	FBpp0112023	0.111	0.1	0.222
P19	3L	11159508	TCAG	T	IRSp53	1	.	.	.	.	.	744-746-delinframe	.	delinframe	FBpp0075945	0.238	0.2	0.476
P19	3R	11578580	AGCAG	A	CG6790	-1	.	.	.	.	.	157-160-delfrshift	.	delfrshift	FBpp0081936	0.0816	0	0.1632
P19	X	6535987	CCAA	C	dx	1	.	.	.	.	.	957-959-delinframe	.	delinframe	FBpp0070876	0.087	4.1	0.087
P19	X	7939825	CACG	C	Ubr3	1	.	.	.	.	.	782-784-delinframe	.	delinframe	FBpp0290962	0.105	2	0.105
P19	X	19213552	GA	G	Mur18B	1	.	.	.	.	.	191-191-delfrshift	.	delfrshift	FBpp0074443	0.136	2.5	0.136
P23	2L	1585368	C	CT	CG10869	-1	.	.	.	.	.	1602-1603-insfrshift	.	insfrshift	FBpp0077583	0.1	0	0.2
P23	2L	4943222	T	TG	CG14044	1	.	.	.	.	.	304-305-insfrshift	.	insfrshift	FBpp0078629	0.182	0.4	0.364
P23	2L	17455354	A	C	SPH93	-1	T	G	ATC	AGC	S157A	T469G	TCA>GCA	Missense	FBpp0080557	0.167	0	0.334
P23	2R	1727911	TA	T	CG41520	1	.	.	.	.	.	1473-1473-delfrshift	.	delfrshift	FBpp0112834	0.125	0.1	0.25
P23	2R	14971870	A	ATC	ckn	1	.	.	.	.	.	91-92-insfrshift	.	insfrshift	FBpp0086540	0.12	0.6	0.24
P23	3L	6737767	GACT	G	dikar	-1	.	.	.	.	.	2554-2556-delinframe	.	delinframe	FBpp0292763	0.125	0.3	0.25
P23	3L	11130163	A	AG	NaPi-III	1	.	.	.	.	.	403-404-insfrshift	.	insfrshift	FBpp0290653	0.125	0.1	0.25
P23	3L	20368983	AG	A	in	1	.	.	.	.	.	1669-1669-delfrshift	.	delfrshift	FBpp0077841	0.108	0	0.216
P23	3R	6307523	A	G	CG46026	1	A	G	GAA	GGA	E188G	A563G	GAA>GGA	Missense	FBpp0312502	0.222	0	0.444
P23	3R	11239167	C	CA	CG31388	1	.	.	.	.	.	815-816-insfrshift	.	insfrshift	FBpp0081832	0.121	0.6	0.242
P23	3R	24922721	T	TG	Mink	1	.	.	.	.	.	85-86-insfrshift	.	insfrshift	FBpp0084092	0.121	3.8	0.242
P23	3R	25965289	AC	A	boss	1	.	.	.	.	.	1244-1244-delfrshift	.	delfrshift	FBpp0084323	0.121	0	0.242
P23	X	10598380	G	A	CG2124	1	G	A	CGC	CAC	R622H	G1865A	CGC>CAC	Missense	FBpp0071420	1	0.3	1
P23	X	13286503	TC	T	CG15743	1	.	.	.	.	.	154-154-delfrshift	.	delfrshift	FBpp0311952	0.174	0.6	0.174
P25	2L	3127669	CTGG	C	toc	-1	.	.	.	.	.	128-130-delinframe	.	delinframe	FBpp0077346	0.154	0.2	0.308
P25	2L	7866090	TTGC	T	Proc	-1	.	.	.	.	.	234-236-delinframe	.	delinframe	FBpp0310066	0.195	0	0.39
P25	2L	8221658	GT	G	Pvr	-1	.	.	.	.	.	4624-4624-delfrshift	.	delfrshift	FBpp0291358	0.105	0.4	0.21
P25	2L	12537807	TTGC	T	bun	-1	.	.	.	.	.	1518-1520-delinframe	.	delinframe	FBpp0288933	0.174	50	0.348
P25	2L	15068757	T	C	solo	1	T	C	TTC	TCC	F100S	T299C	TTC>TCC	Missense	FBpp0401449	0.211	8.1	0.422
P25	2L	15068757	T	C	vas	1	T	C	TTC	TCC	F100S	T299C	TTC>TCC	Missense	FBpp0401446	0.211	8.1	0.422
P25	2R	11218148	GC	G	CG9084	-1	.	.	.	.	.	277-277-delfrshift	.	delfrshift	FBpp0303485	0.13	8.3	0.26
P25	2R	12564341	T	C	CG33775	-1	A	G	CAG	CGG	S144S	A432G	TCA>TCG	Synonymous	FBpp0091037	0.143	0.4	0.286
P25	2R	17821168	GCAA	G	grh	1	.	.	.	.	.	1414-1416-delinframe	.	delinframe	FBpp0288984	0.119	0	0.238
P25	2R	18844729	CA	C	CG15099	-1	.	.	.	.	.	938-938-delfrshift	.	delfrshift	FBpp0085810	0.0678	4.5	0.1356
P25	2R	20958682	TTGC	T	hbn	-1	.	.	.	.	.	318-320-delinframe	.	delinframe	FBpp0071485	0.143	0.3	0.286
P25	3L	7321723	AGAG	A	RhoGEF4	-1	.	.	.	.	.	1404-1406-delinframe	.	delinframe	FBpp0076595	0.167	4.8	0.334
P25	3L	7890176	ACAG	A	CG32365	1	.	.	.	.	.	601-603-delinframe	.	delinframe	FBpp0076463	0.0976	0.7	0.1952
P25	3L	23174531	CA	C	CG34031	1	.	.	.	.	.	66-66-delfrshift	.	delfrshift	FBpp0301047	0.1	0.8	0.2
P25	3R	15233238	GT	G	tefu	-1	.	.	.	.	.	7532-7532-delfrshift	.	delfrshift	FBpp0110174	0.1	1.4	0.2
P25	3R	26995361	GA	G	TwdlC	1	.	.	.	.	.	214-214-delfrshift	.	delfrshift	FBpp0084447	0.111	1.8	0.222
P25	X	3067157	T	A	CG4116	-1	A	T	CAC	CTC	T136S	A406T	ACA>TCA	Missense	FBpp0070536	0.231	0	0.231
P25	X	4904555	A	T	CG42594	1	A	T	GAA	GTA	E820V	A2459T	GAA>GTA	Missense	FBpp0311748	0.231	0	0.231
P25	X	6285515	C	G	Top3beta	-1	G	C	TGA	TCA	E603Q	G1807C	GAG>CAG	Missense	FBpp0309042	0.227	4.7	0.227
P25	X	12285747	TGCA	T	Ten-a	1	.	.	.	.	.	1929-1931-delinframe	.	delinframe	FBpp0311958	0.231	0	0.231
P25	X	19486670	GGCT	G	pcm	-1	.	.	.	.	.	4403-4405-delinframe	.	delinframe	FBpp0291292	0.2	0.6	0.2
P27	2L	4555748	T	A	dpy	-1	A	T	AAG	ATG	K2702M	A8105T	AAG>ATG	Missense	FBpp0304622	0.0843	0	0.1686
P27	3L	4897994	T	C	CG13705	1	T	C	GTC	GCC	R336R	T1008C	CGT>CGC	Synonymous	FBpp0073208	0.281	5	0.562
P27	3L	4898009	C	T	CG13705	1	C	T	CCG	CTG	S341S	C1023T	TCC>TCT	Synonymous	FBpp0073208	0.219	5	0.438
P27	3R	22711737	TGTA	T	wge	-1	.	.	.	.	.	4986-4988-delinframe	.	delinframe	FBpp0302573	0.0851	1.9	0.1702
P29	2L	7475870	A	AGGTG	CG6441	1	.	.	.	.	.	963-964-insfrshift	.	insfrshift	FBpp0079079	0.167	0.1	0.334
P29	3L	9628213	CA	C	Or67b	-1	.	.	.	.	.	684-684-delfrshift	.	delfrshift	FBpp0076149	0.0909	0	0.1818
P29	3L	16269726	T	C	CG13068	1	T	C	ATA	ACA	Y74Y	T222C	TAT>TAC	Synonymous	FBpp0075219	0.2	0	0.4
P29	3L	19891996	C	T	Su(Tpl)	-1	G	A	CGG	CAG	R903Q	G2708A	CGG>CAG	Missense	FBpp0310656	0.0465	29.8	0.093
P29	3L	20472819	ATTG	A	CG32428	-1	.	.	.	.	.	153-155-delinframe	.	delinframe	FBpp0292443	0.125	16.7	0.25
P29	3R	7525389	C	T	alpha-Est6	-1	G	A	GGC	GAC	G349D	G1046A	GGC>GAC	Missense	FBpp0081073	0.0656	0	0.1312
P29	3R	20294675	ACAG	A	cic	1	.	.	.	.	.	3196-3198-delinframe	.	delinframe	FBpp0306420	0.0952	2.7	0.1904
P29	X	8019641	G	GT	CG15333	-1	.	.	.	.	.	1624-1625-insfrshift	.	insfrshift	FBpp0071076	0.16	0.1	0.16
P3	2L	2742827	T	C	Hrs	1	T	C	GTC	GCC	G675G	T2025C	GGT>GGC	Synonymous	FBpp0088691	0.364	4	0.728
P3	2L	2742860	A	T	Hrs	1	A	T	CAC	CTC	P686P	A2058T	CCA>CCT	Synonymous	FBpp0088691	0.304	4	0.608
P3	2L	7458149	C	T	Gr28b	-1	G	A	CGC	CAC	A202A	G606A	GCG>GCA	Synonymous	FBpp0089145	0.2	0	0.4
P3	2L	9529275	A	G	CG31883	1	A	G	TAA	TGA	K250E	A748G	AAA>GAA	Missense	FBpp0079427	0.35	0.1	0.7
P3	2L	21681173	G	T	eEF2	-1	C	A	CCG	CAG	P110P	C330A	CCC>CCA	Synonymous	FBpp0085266	0.364	499.7	0.728
P3	2L	21681176	C	A	eEF2	-1	G	T	CGC	CTC	S109S	G327T	TCG>TCT	Synonymous	FBpp0085266	0.364	499.7	0.728
P3	2R	10098597	A	C	RpLP0-like	-1	T	G	ATG	AGG	D255E	T765G	GAT>GAG	Missense	FBpp0087511	0.462	44.8	0.924
P3	2R	13455864	C	T	arr	-1	G	A	GGC	GAC	G1223D	G3668A	GGC>GAC	Missense	FBpp0086821	0.273	3.6	0.546
P3	3L	5758528	C	A	Usp47	1	C	A	ACT	AAT	Y721*	C2163A	TAC>TAA	Nonsense	FBpp0076802	0.389	2	0.778
P3	3L	20204793	C	CAGAGGAAGTCGAGCCGGAGGAAGTTGACCT	CG7290	-1	.	.	.	.	.	1138-1139-insfrshift	.	insfrshift	FBpp0074627	0	0	0
P3	3L	24366016	CA	C	nvd	1	.	.	.	.	.	800-800-delfrshift	.	delfrshift	FBpp0112384	0.211	0	0.422
P3	3R	5835924	G	A	CG1208	1	G	A	CGG	CAG	R44Q	G131A	CGG>CAG	Missense	FBpp0112109	0.174	0	0.348
P3	3R	5835929	T	A	CG1208	1	T	A	ATA	AAA	Y46N	T136A	TAT>AAT	Missense	FBpp0112109	0.182	0	0.364
P3	3R	9721065	T	A	hyd	-1	A	T	AAG	ATG	K1115M	A3344T	AAG>ATG	Missense	FBpp0308671	0.364	2.1	0.728
P3	3R	15425239	A	G	CG6118	-1	T	C	GTC	GCC	V28A	T83C	GTC>GCC	Missense	FBpp0112152	0.469	0	0.938
P3	3R	24226639	C	G	Spps	-1	G	C	AGT	ACT	S6T	G17C	AGT>ACT	Missense	FBpp0083950	0.292	0.6	0.584
P3	3R	27533221	AGC	A	CG12885	1	.	.	.	.	.	2007-2008-delfrshift	.	delfrshift	FBpp0084555	0	0	0
P3	3R	27533224	AG	A	CG12885	1	.	.	.	.	.	2010-2010-delfrshift	.	delfrshift	FBpp0084555	0	0	0
P3	4	666238	TA	T	Slip1	1	.	.	.	.	.	1135-1135-delfrshift	.	delfrshift	FBpp0088159	0.148	1.8	0.296
P31	2L	10263153	C	CAGGG	Rsf1	-1	.	.	.	.	.	266-267-insfrshift	.	insfrshift	FBpp0079668	0.111	17	0.222
P31	2L	10263155	ACCCT	A	Rsf1	-1	.	.	.	.	.	260-263-delfrshift	.	delfrshift	FBpp0079668	0.105	17	0.21
P31	2L	10693694	G	A	CG17108	-1	C	T	TCA	TTA	H123Y	C367T	CAT>TAT	Missense	FBpp0079716	0.5	0	1
P31	2L	10693695	A	T	CG17108	-1	T	A	GTC	GAC	G122G	T366A	GGT>GGA	Synonymous	FBpp0079716	0.5	0	1
P31	2L	15916970	G	C	CG13244	1	G	C	CGC	CCC	P11P	G33C	CCG>CCC	Synonymous	FBpp0080350	0.281	0.4	0.562
P31	2R	17567488	T	TG	Ns2	-1	.	.	.	.	.	454-455-insfrshift	.	insfrshift	FBpp0086063	0.0714	49.6	0.1428
P31	2R	18311891	AAGC	A	Tango8	1	.	.	.	.	.	71-73-delinframe	.	delinframe	FBpp0085942	0.08	0	0.16
P31	3L	5483177	G	A	CG4835	1	G	A	AGT	AAT	E1063E	G3189A	GAG>GAA	Synonymous	FBpp0305790	0.278	0.1	0.556
P31	3L	20218934	A	G	CG6933	-1	T	C	GTT	GCT	V258A	T773C	GTT>GCT	Missense	FBpp0302616	0.0816	0	0.1632
P31	X	1247265	TTGC	T	Atf3	-1	.	.	.	.	.	1089-1091-delinframe	.	delinframe	FBpp0070234	0.148	41.4	0.148
P31	X	7689869	TTGC	T	CHES-1-like	-1	.	.	.	.	.	124-126-delinframe	.	delinframe	FBpp0305405	0.15	2	0.15
P31	X	10575899	GTTGTTT	G	spri	-1	.	.	.	.	.	282-287-delinframe	.	delinframe	FBpp0302587	0.105	0.2	0.105
P33	2L	7644572	C	CG	Slob	-1	.	.	.	.	.	2999-3000-insfrshift	.	insfrshift	FBpp0303549	0.0606	0.2	0.1212
P33	2L	18675657	T	A	Mst36Fa	-1	A	T	AAG	ATG	K387M	A1160T	AAG>ATG	Missense	FBpp0293884	0.203	1.4	0.406
P33	2L	21225271	C	CA	CG8677	1	.	.	.	.	.	2946-2947-insfrshift	.	insfrshift	FBpp0312177	0.061	2	0.122
P33	2R	15234663	A	T	Fs	-1	T	A	CTG	CAG	L316Q	T947A	CTG>CAG	Missense	FBpp0089409	0.235	0.4	0.47
P33	3L	14024818	G	GC	Ptip	-1	.	.	.	.	.	3517-3518-insfrshift	.	insfrshift	FBpp0075526	0	0.8	0
P33	3R	11628045	C	A	CG18764	1	C	A	CCA	CAA	H333N	C997A	CAC>AAC	Missense	FBpp0081893	0.371	1.6	0.742
P33	3R	19978782	G	GACACAACGAGA	CG31213	1	.	.	.	.	.	5199-5200-insfrshift	.	insfrshift	FBpp0307229	0	0	0
P33	3R	19978784	G	GC	CG31213	1	.	.	.	.	.	5201-5202-insfrshift	.	insfrshift	FBpp0307229	0	0	0
P33	X	5176352	GCAT	G	CG15465	1	.	.	.	.	.	1114-1116-delinframe	.	delinframe	FBpp0311010	0.093	0.8	0.093
P33	X	18651770	G	GTGCCA	Ing3	-1	.	.	.	.	.	1118-1119-insfrshift	.	insfrshift	FBpp0074385	0.115	0.5	0.115
P35	2L	11163342	GT	G	Ca-beta	-1	.	.	.	.	.	1118-1118-delfrshift	.	delfrshift	FBpp0301962	0.0896	0	0.1792
P35	2L	16095293	CCTTTGCGA	C	CG4891	1	.	.	.	.	.	259-266-delfrshift	.	delfrshift	FBpp0080373	0.0597	0	0.1194
P35	2R	7384262	TA	T	cos	-1	.	.	.	.	.	2540-2540-delfrshift	.	delfrshift	FBpp0307854	0.0851	0.3	0.1702
P35	2R	12370708	A	G	CG33012	1	A	G	TAT	TGT	I872V	A2614G	ATT>GTT	Missense	FBpp0304543	0.172	0	0.344
P35	3L	1761324	A	AAC	Dhc62B	-1	.	.	.	.	.	9962-9963-insfrshift	.	insfrshift	FBpp0292225	0.0635	0.1	0.127
P35	3R	29181527	C	CTGCTGG	jus	-1	.	.	.	.	.	185-186-insfrshift	.	insfrshift	FBpp0112216	0.0656	0.1	0.1312
P35	3R	30043943	GGAC	G	Sry-delta	1	.	.	.	.	.	466-468-delinframe	.	delinframe	FBpp0084924	0.061	11.5	0.122
P35	X	657163	C	G	SkpA	1	C	G	TCC	TGC	I18M	C54G	ATC>ATG	Missense	FBpp0070124	0.0926	34.9	0.0926
P35	X	1332067	GGGT	G	CG11409	-1	.	.	.	.	.	1561-1563-delinframe	.	delinframe	FBpp0309598	0.0952	0	0.0952
P35	X	2882726	CTGT	C	CG14418	-1	.	.	.	.	.	821-823-delinframe	.	delinframe	FBpp0070540	0.111	0	0.111
P35	X	11696479	C	T	PhKgamma	1	C	T	GCC	GTC	P11S	C31T	CCC>TCC	Missense	FBpp0290715	0.8	3.3	0.8
P35	X	11908901	G	GC	pot	-1	.	.	.	.	.	2654-2655-insfrshift	.	insfrshift	FBpp0073431	0.129	0.2	0.129
P35	X	11908907	CG	C	pot	-1	.	.	.	.	.	2647-2647-delfrshift	.	delfrshift	FBpp0073431	0.129	0.2	0.129
P35	X	15345515	GGA	G	CG6227	1	.	.	.	.	.	46-47-delfrshift	.	delfrshift	FBpp0073828	0.105	1.8	0.105
P37	2R	19491191	G	A	Oseg6	-1	C	T	GCT	GTT	S161S	C483T	AGC>AGT	Synonymous	FBpp0085689	0.291	0.2	0.582
P37	3R	14081691	G	A	foxo	1	G	A	AGC	AAC	Q554Q	G1662A	CAG>CAA	Synonymous	FBpp0293589	0.16	5.2	0.32
P37	4	547448	C	CT	Thd1	-1	.	.	.	.	.	3432-3433-insfrshift	.	insfrshift	FBpp0311396	0.0745	1.4	0.149
P37	X	12706219	GGCA	G	CG15725	1	.	.	.	.	.	23-25-delinframe	.	delinframe	FBpp0073518	0.176	0.6	0.176
P39	2L	16339748	T	C	CG42266	-1	A	G	GAG	GGG	R168R	A504G	AGA>AGG	Synonymous	FBpp0288874	0.333	0	0.666
P39	2R	16788421	A	G	CG5522	1	A	G	CAC	CGC	S52S	A156G	TCA>TCG	Synonymous	FBpp0086181	0.179	0.4	0.358
P39	2R	23322375	T	C	CG30416	-1	A	G	GAT	GGT	D307G	A920G	GAT>GGT	Missense	FBpp0309893	0.333	0	0.666
P39	2R	23322377	G	A	CG30416	-1	C	T	GCG	GTG	S306S	C918T	AGC>AGT	Synonymous	FBpp0309893	0.286	0	0.572
P39	3L	15554428	C	A	AGO2	1	C	A	CCA	CAA	P55Q	C164A	CCA>CAA	Missense	FBpp0075313	0.333	6.3	0.666
P39	3L	20162734	C	CTGG	CG42674	-1	.	.	.	.	.	1437-1438-insfrshift	.	insfrshift	FBpp0291854	0.0952	0.6	0.1904
P39	X	18607794	GT	G	CG15040	-1	.	.	.	.	.	4595-4595-delfrshift	.	delfrshift	FBpp0074389	0.176	0.1	0.176
P41	2L	561616	T	C	CG11835	-1	A	G	AAC	AGC	K522K	A1566G	AAA>AAG	Synonymous	FBpp0311648	0.276	0.5	0.552
P41	2L	6330351	CG	C	PDZ-GEF	1	.	.	.	.	.	4431-4431-delfrshift	.	delfrshift	FBpp0078879	0.0638	0	0.1276
P41	2L	14713014	GAGC	G	CG15282	1	.	.	.	.	.	203-205-delinframe	.	delinframe	FBpp0080224	0.08	0.1	0.16
P41	2R	10098872	C	T	RpLP0-like	-1	G	A	GGA	GAA	E164K	G490A	GAG>AAG	Missense	FBpp0087511	0.0704	44.8	0.1408
P41	2R	18021484	G	C	CG10910	1	G	C	TGA	TCA	E349Q	G1045C	GAA>CAA	Missense	FBpp0088573	0.349	1.6	0.698
P41	3L	4216943	A	G	CG43367	1	A	G	CAG	CGG	Q1958R	A5873G	CAG>CGG	Missense	FBpp0298310	0.0476	0.9	0.0952
P41	3L	7584568	AG	A	CG14838	1	.	.	.	.	.	951-951-delfrshift	.	delfrshift	FBpp0076513	0.0755	0	0.151
P41	3R	18597136	GGCT	G	CG14304	-1	.	.	.	.	.	1103-1105-delinframe	.	delinframe	FBpp0112989	0.0667	0	0.1334
P41	X	19513765	ACAG	A	CG14200	1	.	.	.	.	.	2916-2918-delinframe	.	delinframe	FBpp0074490	0.108	0.4	0.108
P43	2L	13131597	T	A	CG5122	1	T	A	CTA	CAA	S272S	T816A	TCT>TCA	Synonymous	FBpp0080012	0.194	0	0.388
P43	2L	16339638	T	G	CG42266	-1	A	C	CAG	CCG	Q205P	A614C	CAG>CCG	Missense	FBpp0288874	0.268	0	0.536
P43	2R	20505202	C	T	Obp57a	1	C	T	TCT	TTT	L12F	C34T	CTT>TTT	Missense	FBpp0085606	0.108	0	0.216
P43	3L	3620813	CTTAAAACACATTAACCTACAATATAGTAATACATTTT	C	CG14974	-1	.	.	.	.	.	NA	.	NA	FBpp0072999	0.265	0	0.53
P43	3L	4898078	C	T	CG13705	1	C	T	CCC	CTC	P364P	C1092T	CCC>CCT	Synonymous	FBpp0073208	0.171	5	0.342
P43	3L	9715945	G	C	vsg	1	G	C	AGC	ACC	S92T	G275C	AGC>ACC	Missense	FBpp0076130	0.167	71	0.334
P43	3L	11289286	C	A	CG6175	-1	G	T	AGC	ATC	Q425H	G1275T	CAG>CAT	Missense	FBpp0305581	0.0606	0.9	0.1212
P43	3R	18655328	C	T	CG31224	-1	G	A	AGC	AAC	E480E	G1440A	GAG>GAA	Synonymous	FBpp0310714	0.075	3.1	0.15
P43	3R	26619387	A	C	TwdlM	1	A	C	GAG	GCG	G48G	A144C	GGA>GGC	Synonymous	FBpp0084401	0.19	0	0.38
P43	3R	26619402	A	C	TwdlM	1	A	C	GAG	GCG	G53G	A159C	GGA>GGC	Synonymous	FBpp0084401	0.241	0	0.482
P43	4	891152	GT	G	unc-13	-1	.	.	.	.	.	1644-1644-delfrshift	.	delfrshift	FBpp0300963	0.131	0.8	0.262
P43	X	22866388	TGCA	T	CG42346	1	.	.	.	.	.	201-203-delinframe	.	delinframe	FBpp0305379	0.109	0.1	0.109
P45a	2L	543848	T	TGCA	Spp	-1	.	.	.	.	.	629-630-insfrshift	.	insfrshift	FBpp0077740	0.136	65	0.272
P45a	2L	1976664	GCT	G	CG15356	-1	.	.	.	.	.	2948-2949-delfrshift	.	delfrshift	FBpp0077538	0.0909	0	0.1818
P45a	2L	9654360	TC	T	Apoltp	1	.	.	.	.	.	11655-11655-delfrshift	.	delfrshift	FBpp0292877	0.138	0	0.276
P45a	2L	10679097	A	G	CG17104	1	A	G	AAG	AGG	E364E	A1092G	GAA>GAG	Synonymous	FBpp0311163	0.286	0.6	0.572
P45a	3R	5468769	C	CGT	POLDIP2	1	.	.	.	.	.	680-681-insfrshift	.	insfrshift	FBpp0078330	0.2	1.5	0.4
P45a	3R	9794429	AT	A	CG8516	1	.	.	.	.	.	660-660-delfrshift	.	delfrshift	FBpp0081619	0.143	0.4	0.286
P45a	3R	14081134	TGCA	T	foxo	1	.	.	.	.	.	1290-1292-delinframe	.	delinframe	FBpp0293589	0.19	5.2	0.38
P45a	3R	29750002	CAT	C	yata	1	.	.	.	.	.	213-214-delfrshift	.	delfrshift	FBpp0084843	0.115	3.5	0.23
P45a	3R	31360700	CGGA	C	CG34347	1	.	.	.	.	.	2374-2376-delinframe	.	delinframe	FBpp0288485	0.0833	0.2	0.1666
P45a	4	1229947	GT	G	Dyrk3	-1	.	.	.	.	.	26-26-delfrshift	.	delfrshift	FBpp0099818	0.152	1.6	0.304
P45a	X	10879901	CA	C	Ork1	-1	.	.	.	.	.	1674-1674-delfrshift	.	delfrshift	FBpp0310181	0.286	0	0.286
P45a	X	11573022	TC	T	Reepl1	1	.	.	.	.	.	222-222-delfrshift	.	delfrshift	FBpp0073360	0.333	0	0.333
P45a	X	14289239	AGTG	A	CG9400	-1	.	.	.	.	.	123-125-delinframe	.	delinframe	FBpp0073737	0.125	0	0.125
P45a	X	22866294	GA	G	CG42346	1	.	.	.	.	.	107-107-delfrshift	.	delfrshift	FBpp0305379	0.25	0.1	0.25
P47	2L	217985	CT	C	kis	-1	.	.	.	.	.	11136-11136-delfrshift	.	delfrshift	FBpp0289115	0.136	0	0.272
P47	2L	9590087	C	T	CG3841	1	C	T	GCA	GTA	A141V	C422T	GCA>GTA	Missense	FBpp0079434	0.333	0.3	0.666
P47	2L	15050462	AT	A	ck	-1	.	.	.	.	.	1830-1830-delfrshift	.	delfrshift	FBpp0310275	0.115	0.2	0.23
P47	2L	16607573	C	A	CG4631	1	C	A	TCC	TAC	V28V	C84A	GTC>GTA	Synonymous	FBpp0080428	0.467	0.1	0.934
P47	2R	8877284	TC	T	RyR	1	.	.	.	.	.	7864-7864-delfrshift	.	delfrshift	FBpp0293114	0.13	0	0.26
P47	2R	10042779	GT	G	CG34220	-1	.	.	.	.	.	597-597-delfrshift	.	delfrshift	FBpp0111328	0.312	1.4	0.624
P47	2R	10840839	C	G	CG30015	-1	G	C	TGA	TCA	V1199V	G3597C	GTG>GTC	Synonymous	FBpp0297485	0.235	2.6	0.47
P47	2R	10886092	C	CG	CG18004	1	.	.	.	.	.	736-737-insfrshift	.	insfrshift	FBpp0088669	0.136	1.6	0.272
P47	2R	16168595	G	A	lbk	1	G	A	CGA	CAA	D1167N	G3499A	GAC>AAC	Missense	FBpp0291294	0.161	5.9	0.322
P47	2R	16648104	GT	G	gprs	1	.	.	.	.	.	3235-3235-delfrshift	.	delfrshift	FBpp0086255	0.2	0	0.4
P47	2R	20586672	CA	C	Nnf1a	-1	.	.	.	.	.	371-371-delfrshift	.	delfrshift	FBpp0085569	0.114	21.9	0.228
P47	2R	20664048	GATT	G	Fem-1	-1	.	.	.	.	.	1186-1188-delinframe	.	delinframe	FBpp0085558	0.115	1.8	0.23
P47	2R	21943775	CG	C	Fili	1	.	.	.	.	.	1517-1517-delfrshift	.	delfrshift	FBpp0111505	0.12	0.1	0.24
P47	2R	22592376	T	TG	dnr1	-1	.	.	.	.	.	35-36-insfrshift	.	insfrshift	FBpp0071748	0.0976	14.6	0.1952
P47	2R	23561006	CCA	C	Pi3K59F	1	.	.	.	.	.	360-361-delfrshift	.	delfrshift	FBpp0071973	0.0909	3.2	0.1818
P47	2R	25039115	T	TACCTAAC	Nplp1	1	.	.	.	.	.	1201-1202-insfrshift	.	insfrshift	FBpp0288531	0.238	0	0.476
P47	3L	3825605	AAGC	A	Rdh	1	.	.	.	.	.	83-85-delinframe	.	delinframe	FBpp0073012	0.167	0.2	0.334
P47	3L	6188077	G	A	D19A	-1	C	T	ACG	ATG	N301N	C903T	AAC>AAT	Synonymous	FBpp0076724	0.143	3.4	0.286
P47	3L	6188085	A	G	D19A	-1	T	C	GTA	GCA	Y299H	T895C	TAC>CAC	Missense	FBpp0076724	0.143	3.4	0.286
P47	3L	11162249	CCAG	C	IRSp53	1	.	.	.	.	.	2632-2634-delinframe	.	delinframe	FBpp0075945	0.167	0.2	0.334
P47	3L	16084548	T	TGC	CG13075	1	.	.	.	.	.	443-444-insfrshift	.	insfrshift	FBpp0290253	0.0889	0.3	0.1778
P47	3L	18676988	A	AT	GNBP1	1	.	.	.	.	.	810-811-insfrshift	.	insfrshift	FBpp0074817	0.121	3.4	0.242
P47	3R	10349256	C	CTCGCTGCTCGCTG	CG31406	1	.	.	.	.	.	274-275-insfrshift	.	insfrshift	FBpp0081714	0.316	0	0.632
P47	3R	10349258	A	ACCTC	CG31406	1	.	.	.	.	.	276-277-insfrshift	.	insfrshift	FBpp0081714	0.3	0	0.6
P47	3R	10799950	A	C	CG14692	-1	T	G	ATT	AGT	N1105K	T3315G	AAT>AAG	Missense	FBpp0312494	0.3	0	0.6
P47	3R	12009894	C	CCCG	KLHL18	-1	.	.	.	.	.	382-383-insfrshift	.	insfrshift	FBpp0307415	0.136	0.8	0.272
P47	3R	24125629	GC	G	Root	1	.	.	.	.	.	4350-4350-delfrshift	.	delfrshift	FBpp0308352	0.13	0.1	0.26
P47	3R	25922436	CT	C	CG14546	-1	.	.	.	.	.	61-61-delfrshift	.	delfrshift	FBpp0084357	0.176	0	0.352
P47	X	1885393	C	CAG	trr	-1	.	.	.	.	.	4383-4384-insfrshift	.	insfrshift	FBpp0070347	0.125	0.5	0.125
P47	X	8139640	C	CGT	Smox	-1	.	.	.	.	.	1043-1044-insfrshift	.	insfrshift	FBpp0071140	0.125	21.3	0.125
P47	X	8559232	C	G	CG12112	-1	G	C	GGA	GCA	E199Q	G595C	GAG>CAG	Missense	FBpp0071177	0.308	7.2	0.308
P47	X	19744990	ACAT	A	Rpp20	1	.	.	.	.	.	390-392-delinframe	.	delinframe	FBpp0311904	0.105	0	0.105
P49	2L	17441570	C	A	dl	-1	G	T	AGT	ATT	V407L	G1219T	GTG>TTG	Missense	FBpp0309222	0.103	9	0.206
P49	2L	17441574	C	T	dl	-1	G	A	AGT	AAT	Q405Q	G1215A	CAG>CAA	Synonymous	FBpp0309222	0.0833	9	0.1666
P49	2L	18204222	T	C	CG42750	-1	A	G	AAC	AGC	Q469Q	A1407G	CAA>CAG	Synonymous	FBpp0292372	0.333	0	0.666
P49	2R	23976268	T	A	PPP1R15	-1	A	T	AAG	ATG	E208D	A624T	GAA>GAT	Missense	FBpp0072113	0.217	34.3	0.434
P49	3L	13506273	ACAG	A	Spt20	1	.	.	.	.	.	2797-2799-delinframe	.	delinframe	FBpp0075554	0.069	0.7	0.138
P49	3L	14024818	G	GC	Ptip	-1	.	.	.	.	.	3517-3518-insfrshift	.	insfrshift	FBpp0075526	0	0.8	0
P49	3R	19978782	G	GACACAACGAGA	CG31213	1	.	.	.	.	.	5199-5200-insfrshift	.	insfrshift	FBpp0307229	0	0	0
P49	3R	19978784	G	GC	CG31213	1	.	.	.	.	.	5201-5202-insfrshift	.	insfrshift	FBpp0307229	0	0	0
P49	3R	25398697	A	T	Muc96D	-1	T	A	CTA	CAA	T620T	T1860A	ACT>ACA	Synonymous	FBpp0084219	0.288	0	0.576
P49	3R	29181533	C	G	jus	-1	G	C	AGC	ACC	S60T	G179C	AGC>ACC	Missense	FBpp0112216	0.204	0.1	0.408
P5	2L	7016149	G	A	Gart	-1	C	T	CCC	CTC	P1000L	C2999T	CCC>CTC	Missense	FBpp0308722	0.2	20.4	0.4
P5	2L	16803455	GC	G	CG13280	-1	.	.	.	.	.	284-284-delfrshift	.	delfrshift	FBpp0080485	0.176	0	0.352
P5	2R	4829409	G	A	CG14464	1	G	A	CGA	CAA	E35K	G103A	GAA>AAA	Missense	FBpp0289201	0.1	28.7	0.2
P5	2R	8996565	ACTG	A	Np	-1	.	.	.	.	.	1521-1523-delinframe	.	delinframe	FBpp0111472	0.12	0	0.24
P5	2R	10234009	TTGC	T	CG12912	-1	.	.	.	.	.	201-203-delinframe	.	delinframe	FBpp0087453	0.125	0	0.25
P5	2R	17413256	C	T	Prosalpha5	1	C	T	GCC	GTC	C96C	C288T	TGC>TGT	Synonymous	FBpp0086066	0.2	83.2	0.4
P5	2R	17587754	C	T	RhoGAP54D	-1	G	A	CGA	CAA	D710N	G2128A	GAC>AAC	Missense	FBpp0302900	0.333	0.2	0.666
P5	3L	3163634	G	GT	rasp	1	.	.	.	.	.	1435-1436-insfrshift	.	insfrshift	FBpp0072893	0.357	5.4	0.714
P5	3L	11683331	T	A	TfIIEalpha	1	T	A	GTA	GAA	G340G	T1020A	GGT>GGA	Synonymous	FBpp0075839	0.267	14.7	0.534
P5	3L	19843256	ACAG	A	kto	1	.	.	.	.	.	6055-6057-delinframe	.	delinframe	FBpp0074653	0.0857	0.9	0.1714
P5	3R	2136970	CA	C	Myo81F	1	.	.	.	.	.	4517-4517-delfrshift	.	delfrshift	FBpp0352251	0.158	0	0.316
P5	3R	5716442	C	T	cas	-1	G	A	AGC	AAC	Q57Q	G171A	CAG>CAA	Synonymous	FBpp0078374	0.15	0.1	0.3
P5	3R	20820214	CTGCTGCTGT	C	CG17271	-1	.	.	.	.	.	816-824-delinframe	.	delinframe	FBpp0083397	0.211	19.3	0.422
P5	X	3693610	ACAG	A	Mnt	1	.	.	.	.	.	127-129-delinframe	.	delinframe	FBpp0291035	0.13	2.3	0.13
P51	2L	3110134	CAT	C	PpD6	1	.	.	.	.	.	416-417-delfrshift	.	delfrshift	FBpp0077344	0.0784	0	0.1568
P51	2L	4495405	CA	C	dpy	-1	.	.	.	.	.	54740-54740-delfrshift	.	delfrshift	FBpp0304622	0.0702	0	0.1404
P51	2L	7866090	TTGC	T	Proc	-1	.	.	.	.	.	234-236-delinframe	.	delinframe	FBpp0310066	0.235	0	0.47
P51	2L	18475942	TTGC	T	CG10283	-1	.	.	.	.	.	783-785-delinframe	.	delinframe	FBpp0289900	0.143	5.9	0.286
P51	2L	21233164	T	A	CG31626	-1	A	T	CAG	CTG	P113P	A339T	CCA>CCT	Synonymous	FBpp0081015	0.235	0	0.47
P51	2R	18283464	TTGC	T	sbb	-1	.	.	.	.	.	3978-3980-delinframe	.	delinframe	FBpp0290765	0.1	1.5	0.2
P51	3L	2128468	GTGT	G	zormin	-1	.	.	.	.	.	7370-7372-delinframe	.	delinframe	FBpp0304429	0	0.1	0
P51	3L	11078124	CGAT	C	CG7839	1	.	.	.	.	.	3082-3084-delinframe	.	delinframe	FBpp0075937	0.093	5.6	0.186
P51	3L	11397819	T	C	CG44362	1	T	C	TTT	TCT	F93S	T278C	TTT>TCT	Missense	FBpp0308958	0.19	0	0.38
P51	3L	19642494	CGCA	C	CG8786	-1	.	.	.	.	.	171-173-delinframe	.	delinframe	FBpp0304246	0.13	0.5	0.26
P51	3R	5550192	G	A	mia	-1	C	T	CCG	CTG	S143S	C429T	TCC>TCT	Synonymous	FBpp0088355	0.233	0.3	0.466
P51	3R	24872965	C	A	CG3744	-1	G	T	AGG	ATG	E888D	G2664T	GAG>GAT	Missense	FBpp0306644	0.324	0.4	0.648
P51	3R	25649913	T	C	jigr1	1	T	C	CTT	CCT	L293L	T877C	TTG>CTG	Synonymous	FBpp0112199	0.167	2.3	0.334
P51	X	2370904	CGA	C	PsGEF	-1	.	.	.	.	.	6282-6283-delfrshift	.	delfrshift	FBpp0305709	0.143	0	0.143
P51	X	7868473	TGTG	T	2001-12-01	-1	.	.	.	.	.	4344-4346-delinframe	.	delinframe	FBpp0071097	0.143	0	0.143
P51	X	9281199	G	GCCT	c11.1	-1	.	.	.	.	.	524-525-insfrshift	.	insfrshift	FBpp0071261	0.143	3.6	0.143
P51	X	21356217	AGG	A	sol	1	.	.	.	.	.	3768-3769-delfrshift	.	delfrshift	FBpp0088620	0.118	1.9	0.118
P53	3L	9753140	CTGT	C	CG42268	-1	.	.	.	.	.	234-236-delinframe	.	delinframe	FBpp0303927	0.0548	0.4	0.1096
P53	3L	11964108	C	G	prc	-1	G	C	AGC	ACC	S215T	G644C	AGC>ACC	Missense	FBpp0075796	0.255	0.1	0.51
P53	3R	25400047	C	A	Muc96D	-1	G	T	CGT	CTT	T170T	G510T	ACG>ACT	Synonymous	FBpp0084219	0.188	0	0.376
P53	3R	25400056	A	T	Muc96D	-1	T	A	CTA	CAA	T167T	T501A	ACT>ACA	Synonymous	FBpp0084219	0.191	0	0.382
P53	X	13728113	A	T	g	-1	T	A	CTG	CAG	S1008S	T3024A	TCT>TCA	Synonymous	FBpp0073673	0.348	1.6	0.348
P53	X	19259072	G	A	rictor	-1	C	T	GCC	GTC	C192C	C576T	TGC>TGT	Synonymous	FBpp0074458	0.0952	7.1	0.0952
P55	2L	17287321	T	C	CG15140	1	T	C	CTG	CCG	P290P	T870C	CCT>CCC	Synonymous	FBpp0291600	0.206	0	0.412
P55	2R	23489939	GGTT	G	CG43795	1	.	.	.	.	.	3280-3282-delinframe	.	delinframe	FBpp0304311	0.0909	0.4	0.1818
P55	2R	23747706	G	C	CG13560	1	G	C	GGA	GCA	G36G	G108C	GGG>GGC	Synonymous	FBpp0311635	0.265	0	0.53
P55	3L	5483177	G	A	CG4835	1	G	A	AGT	AAT	E1063E	G3189A	GAG>GAA	Synonymous	FBpp0305790	0.179	0.1	0.358
P55	3R	10768967	CT	C	CG45076	-1	.	.	.	.	.	1109-1109-delfrshift	.	delfrshift	FBpp0310814	0.143	0	0.286
P55	X	15685314	G	GGAGATA	CG15599	-1	.	.	.	.	.	3257-3258-insfrshift	.	insfrshift	FBpp0312520	0.0417	0	0.0417
P57	2L	4647640	C	A	CG43798	1	C	A	TCC	TAC	P140T	C418A	CCT>ACT	Missense	FBpp0304328	0.312	0	0.624
P57	2L	16506467	TCTG	T	Tpr2	1	.	.	.	.	.	1054-1056-delinframe	.	delinframe	FBpp0305671	0.0727	5.8	0.1454
P57	2L	17287321	T	C	CG15140	1	T	C	CTG	CCG	P290P	T870C	CCT>CCC	Synonymous	FBpp0291600	0.171	0	0.342
P57	2R	8012648	C	T	CG14762	-1	G	A	AGG	AAG	Q27Q	G81A	CAG>CAA	Synonymous	FBpp0293292	0.305	0	0.61
P57	3L	1658068	G	T	CG7971	-1	C	A	CCA	CAA	S684S	C2052A	TCC>TCA	Synonymous	FBpp0292226	0.191	2.2	0.382
P57	3L	6749671	CCTG	C	velo	-1	.	.	.	.	.	1630-1632-delinframe	.	delinframe	FBpp0076659	0.08	2.1	0.16
P57	3R	7195761	A	G	lap	1	A	G	AAC	AGC	Q620Q	A1860G	CAA>CAG	Synonymous	FBpp0291394	0.209	1.6	0.418
P59	2L	4865534	A	G	smog	1	A	G	AAC	AGC	T78A	A232G	ACA>GCA	Missense	FBpp0293448	0.3	0.1	0.6
P59	2L	4865539	A	T	smog	1	A	T	CAG	CTG	A79A	A237T	GCA>GCT	Synonymous	FBpp0293448	0.286	0.1	0.572
P59	2L	8827912	GGCA	G	SoxN	1	.	.	.	.	.	1420-1422-delinframe	.	delinframe	FBpp0079335	0.231	0.1	0.462
P59	2L	15759030	G	C	Gli	-1	C	G	ACA	AGA	Q354E	C1060G	CAG>GAG	Missense	FBpp0080328	0.286	1.7	0.572
P59	2L	19042233	T	C	Catsup	1	T	C	ATC	ACC	H96H	T288C	CAT>CAC	Synonymous	FBpp0080687	0.281	10.6	0.562
P59	2L	19042236	T	C	Catsup	1	T	C	ATC	ACC	H97H	T291C	CAT>CAC	Synonymous	FBpp0080687	0.273	10.6	0.546
P59	2R	13691997	ACGG	A	CG6220	-1	.	.	.	.	.	1040-1042-delinframe	.	delinframe	FBpp0086776	0.0714	0	0.1428
P59	3L	2042138	TCG	T	sls	-1	.	.	.	.	.	54237-54238-delfrshift	.	delfrshift	FBpp0304920	0.0952	0	0.1904
P59	3L	3831978	G	A	enc	1	G	A	AGC	AAC	Q226Q	G678A	CAG>CAA	Synonymous	FBpp0305410	0.185	0.9	0.37
P59	3L	15073084	GAA	G	Plp	-1	.	.	.	.	.	4855-4856-delfrshift	.	delfrshift	FBpp0297121	0.0952	0.1	0.1904
P59	3R	30055642	C	T	spn-A	-1	G	A	GGT	GAT	V79M	G235A	GTG>ATG	Missense	FBpp0084955	0.31	0.5	0.62
P59	X	1076276	G	GCA	CG3655	-1	.	.	.	.	.	919-920-insfrshift	.	insfrshift	FBpp0303758	0.118	0.6	0.118
P59	X	10153827	G	T	CG12645	1	G	T	TGC	TTC	M72I	G216T	ATG>ATT	Missense	FBpp0111886	0.167	0	0.167
P59	X	15111222	CGCA	C	Rab3-GEF	1	.	.	.	.	.	5625-5627-delinframe	.	delinframe	FBpp0402897	0.138	0	0.138
P61	2L	10679187	A	G	CG17104	1	A	G	AAG	AGG	E394E	A1182G	GAA>GAG	Synonymous	FBpp0311163	0.286	0.6	0.572
P61	2L	17973171	ACAG	A	CG5674	1	.	.	.	.	.	1249-1251-delinframe	.	delinframe	FBpp0080574	0.107	0.8	0.214
P61	2R	17166245	GCGGGGGCGGGCTGGTAGA	G	CG10953	-1	.	.	.	.	.	122-139-delinframe	.	delinframe	FBpp0086149	0	0	0
P61	2R	20112951	T	A	18w	1	T	A	CTG	CAG	L356Q	T1067A	CTG>CAG	Missense	FBpp0085620	0.526	2.6	1
P61	3L	11115512	TCTG	T	FoxK	-1	.	.	.	.	.	1876-1878-delinframe	.	delinframe	FBpp0290009	0.114	1.2	0.228
P61	3L	11167846	GA	G	wls	-1	.	.	.	.	.	1377-1377-delfrshift	.	delfrshift	FBpp0075947	0.2	3.8	0.4
P61	3R	18173983	T	A	wrd	1	T	A	CTG	CAG	S233S	T699A	TCT>TCA	Synonymous	FBpp0082978	0.182	1	0.364
P63	3L	7624681	AGC	A	Pura	1	.	.	.	.	.	2280-2281-delfrshift	.	delfrshift	FBpp0088791	0	0.1	0
P63	3L	7624684	AACAGCAG	A	Pura	1	.	.	.	.	.	2283-2289-delfrshift	.	delfrshift	FBpp0088791	0	0.1	0
P63	3R	24371888	CGAG	C	CG17782	-1	.	.	.	.	.	624-626-delinframe	.	delinframe	FBpp0084008	0.082	0	0.164
P63	3R	25190186	G	C	dan	1	G	C	GGA	GCA	G83A	G248C	GGA>GCA	Missense	FBpp0303321	0.22	0	0.44
P63	3R	29181533	C	G	jus	-1	G	C	AGC	ACC	S60T	G179C	AGC>ACC	Missense	FBpp0112216	0.154	0.1	0.308
P65	2L	4940854	A	G	Sgs1	1	A	G	GAC	GGC	T1117A	A3349G	ACA>GCA	Missense	FBpp0077084	0.305	0	0.61
P65	2L	8993217	A	C	CG9555	1	A	C	GAT	GCT	R245S	A735C	AGA>AGC	Missense	FBpp0079362	0.167	4	0.334
P65	2L	15068806	G	T	solo	1	G	T	GGG	GTG	G116G	G348T	GGG>GGT	Synonymous	FBpp0401449	0.192	8.1	0.384
P65	2L	15068806	G	T	vas	1	G	T	GGG	GTG	G116G	G348T	GGG>GGT	Synonymous	FBpp0401446	0.192	8.1	0.384
P65	2R	5020334	G	A	Ir41a	1	G	A	GGG	GAG	W279*	G837A	TGG>TGA	Nonsense	FBpp0307916	0.425	0	0.85
P65	2R	7945458	A	C	CG34431	1	A	C	TAT	TCT	L207L	A621C	CTA>CTC	Synonymous	FBpp0111644	0.12	0.1	0.24
P65	2R	7995991	CTGCTGCTGT	C	Hey	-1	.	.	.	.	.	939-947-delinframe	.	delinframe	FBpp0087945	0.121	0.3	0.242
P65	2R	24752732	G	GTCCTCCTGC	Usp15-31	1	.	.	.	.	.	718-719-insfrshift	.	insfrshift	FBpp0072276	0.19	1.6	0.38
P65	3L	6024661	CA	C	PVRAP	1	.	.	.	.	.	656-656-delfrshift	.	delfrshift	FBpp0076745	0.115	0	0.23
P65	3L	11132161	TG	T	CG32074	-1	.	.	.	.	.	159-159-delfrshift	.	delfrshift	FBpp0075951	0.16	0	0.32
P65	3R	14427299	A	G	cv-c	-1	T	C	TTG	TCG	L557S	T1670C	TTG>TCG	Missense	FBpp0111544	0.207	7.2	0.414
P65	3R	26630461	GCAA	G	TwdlJ	1	.	.	.	.	.	507-509-delinframe	.	delinframe	FBpp0113030	0.12	0	0.24
P65	3R	30111896	ACAG	A	sima	1	.	.	.	.	.	3697-3699-delinframe	.	delinframe	FBpp0310749	0.0889	0	0.1778
P65	X	2882908	TTGC	T	CG14418	-1	.	.	.	.	.	639-641-delinframe	.	delinframe	FBpp0070540	0.214	0	0.214
P65	X	10223196	TCAG	T	CG34408	1	.	.	.	.	.	1402-1404-delinframe	.	delinframe	FBpp0309777	0.25	0.6	0.25
P65	X	10575899	GTTGTTT	G	spri	-1	.	.	.	.	.	282-287-delinframe	.	delinframe	FBpp0302587	0.1	0.2	0.1
P7	2L	543686	GCGTT	G	Spp	-1	.	.	.	.	.	787-790-delfrshift	.	delfrshift	FBpp0077740	0.111	65	0.222
P7	2L	953160	T	TG	CG4341	1	.	.	.	.	.	1636-1637-insfrshift	.	insfrshift	FBpp0077614	0.125	0	0.25
P7	2L	1494402	GCAA	G	CG33128	1	.	.	.	.	.	258-260-delinframe	.	delinframe	FBpp0077595	0.0811	0	0.1622
P7	2L	2205812	G	T	CG31668	-1	C	A	GCG	GAG	R51S	C151A	CGT>AGT	Missense	FBpp0300178	0.167	0	0.334
P7	2L	2268963	ACTC	A	CG17242	-1	.	.	.	.	.	128-130-delinframe	.	delinframe	FBpp0077480	0.222	0	0.444
P7	2L	2950309	CCA	C	lilli	1	.	.	.	.	.	3488-3489-delfrshift	.	delfrshift	FBpp0288480	0.0952	0.2	0.1904
P7	2L	3109948	GT	G	PpD6	1	.	.	.	.	.	230-230-delfrshift	.	delfrshift	FBpp0077344	0.122	0	0.244
P7	2L	7792410	T	TG	LKRSDH	-1	.	.	.	.	.	2256-2257-insfrshift	.	insfrshift	FBpp0079118	0.138	1.2	0.276
P7	2L	9328235	TCG	T	CG17005	1	.	.	.	.	.	385-386-delfrshift	.	delfrshift	FBpp0307607	0.148	0	0.296
P7	2L	9938353	GC	G	Apf	-1	.	.	.	.	.	327-327-delfrshift	.	delfrshift	FBpp0079490	0.12	23.9	0.24
P7	2L	9965510	TG	T	Dref	-1	.	.	.	.	.	1284-1284-delfrshift	.	delfrshift	FBpp0079485	0.16	1.4	0.32
P7	2L	9986819	CA	C	bib	1	.	.	.	.	.	229-229-delfrshift	.	delfrshift	FBpp0079519	0.114	1.7	0.228
P7	2L	10027264	AT	A	CG13127	1	.	.	.	.	.	504-504-delfrshift	.	delfrshift	FBpp0079523	0.0976	0	0.1952
P7	2L	10253852	CT	C	Ror	1	.	.	.	.	.	1450-1450-delfrshift	.	delfrshift	FBpp0079568	0.2	4.5	0.4
P7	2L	10279197	G	A	CG34043	-1	C	T	CCA	CTA	A313A	C939T	GCC>GCT	Synonymous	FBpp0289637	0.214	0.2	0.428
P7	2L	11506572	GA	G	spz4	1	.	.	.	.	.	529-529-delfrshift	.	delfrshift	FBpp0293785	0.111	0	0.222
P7	2L	13167961	AGTTGCGATC	A	Sirt1	1	.	.	.	.	.	1793-1801-delinframe	.	delinframe	FBpp0080015	0.087	16.5	0.174
P7	2L	14811069	CTA	C	CG33309	1	.	.	.	.	.	204-205-delfrshift	.	delfrshift	FBpp0080236	0.13	0	0.26
P7	2L	17455354	A	C	SPH93	-1	T	G	ATC	AGC	S157A	T469G	TCA>GCA	Missense	FBpp0080557	0.429	0	0.858
P7	2L	17719423	ACCCTTGT	A	CadN	-1	.	.	.	.	.	2495-2501-delfrshift	.	delfrshift	FBpp0099721	0.1	0	0.2
P7	2L	17799391	TTC	T	CadN2	-1	.	.	.	.	.	2226-2227-delfrshift	.	delfrshift	FBpp0300935	0.111	0	0.222
P7	2L	20835178	C	A	Oseg5	-1	G	T	AGC	ATC	A122S	G364T	GCA>TCA	Missense	FBpp0288481	0.143	0.7	0.286
P7	2R	5758149	C	CTG	CG7791	-1	.	.	.	.	.	2047-2048-insfrshift	.	insfrshift	FBpp0085393	0.12	16.6	0.24
P7	2R	7280231	CCA	C	Incenp	1	.	.	.	.	.	1313-1314-delfrshift	.	delfrshift	FBpp0307848	0.211	8.7	0.422
P7	2R	7664680	G	GC	CG2065	1	.	.	.	.	.	519-520-insfrshift	.	insfrshift	FBpp0087996	0.12	41.3	0.24
P7	2R	8101497	G	GC	CG11210	1	.	.	.	.	.	1875-1876-insfrshift	.	insfrshift	FBpp0087859	0.174	2.4	0.348
P7	2R	8616410	CG	C	Cirl	1	.	.	.	.	.	134-134-delfrshift	.	delfrshift	FBpp0302596	0.107	2.9	0.214
P7	2R	9818063	C	CA	lectin-46Ca	1	.	.	.	.	.	612-613-insfrshift	.	insfrshift	FBpp0087560	0.242	0	0.484
P7	2R	11265321	TGTA	T	Cpr47Ee	1	.	.	.	.	.	7-9-delinframe	.	delinframe	FBpp0087215	0.176	0	0.352
P7	2R	11386748	G	GT	sprt	-1	.	.	.	.	.	397-398-insfrshift	.	insfrshift	FBpp0087243	0.105	11.4	0.21
P7	2R	11405805	TGAG	T	Smyd4-3	1	.	.	.	.	.	121-123-delinframe	.	delinframe	FBpp0087232	0.0952	0	0.1904
P7	2R	11854449	CGATCA	C	Mtor	1	.	.	.	.	.	1254-1258-delfrshift	.	delfrshift	FBpp0087140	0.0909	1.7	0.1818
P7	2R	11983604	AG	A	RnrS	-1	.	.	.	.	.	1006-1006-delfrshift	.	delfrshift	FBpp0087152	0.107	40.1	0.214
P7	2R	12754042	GGT	G	Taz	-1	.	.	.	.	.	550-551-delfrshift	.	delfrshift	FBpp0086975	0.308	0.7	0.616
P7	2R	15570424	GCA	G	Cdk5	-1	.	.	.	.	.	653-654-delfrshift	.	delfrshift	FBpp0086483	0.114	11.6	0.228
P7	2R	17166247	G	C	CG10953	-1	C	G	CCG	CGG	P46P	C138G	CCC>CCG	Synonymous	FBpp0086149	0.4	0	0.8
P7	2R	21155868	CA	C	CG30389	-1	.	.	.	.	.	149-149-delfrshift	.	delfrshift	FBpp0303268	0.111	0.8	0.222
P7	2R	21213402	C	A	CG4302	-1	G	T	TGG	TTG	G389C	G1165T	GGT>TGT	Missense	FBpp0071551	0.129	0.1	0.258
P7	2R	22381867	AC	A	wrapper	1	.	.	.	.	.	1127-1127-delfrshift	.	delfrshift	FBpp0071732	0.15	0.1	0.3
P7	2R	22912637	CT	C	nahoda	1	.	.	.	.	.	1960-1960-delfrshift	.	delfrshift	FBpp0071853	0.111	0.2	0.222
P7	2R	23737156	C	A	egl	-1	G	T	GGA	GTA	D561Y	G1681T	GAC>TAC	Missense	FBpp0113078	0.167	6.8	0.334
P7	2R	23813384	CT	C	CG4797	-1	.	.	.	.	.	643-643-delfrshift	.	delfrshift	FBpp0072148	0.12	0	0.24
P7	2R	23901272	T	TG	Lpt	1	.	.	.	.	.	2359-2360-insfrshift	.	insfrshift	FBpp0072043	0.143	2.7	0.286
P7	2R	24762758	ATC	A	CG12848	-1	.	.	.	.	.	213-214-delfrshift	.	delfrshift	FBpp0302052	0.1	47.1	0.2
P7	3L	256679	CT	C	DIP2	-1	.	.	.	.	.	522-522-delfrshift	.	delfrshift	FBpp0072420	0.115	1.5	0.23
P7	3L	272452	TA	T	CG32845	-1	.	.	.	.	.	918-918-delfrshift	.	delfrshift	FBpp0072418	0.154	0.5	0.308
P7	3L	276107	CG	C	ttm2	1	.	.	.	.	.	771-771-delfrshift	.	delfrshift	FBpp0072407	0.2	1.9	0.4
P7	3L	356932	CTT	C	CG1231	1	.	.	.	.	.	512-513-delfrshift	.	delfrshift	FBpp0072445	0.12	0.1	0.24
P7	3L	368128	T	TGG	trh	-1	.	.	.	.	.	2424-2425-insfrshift	.	insfrshift	FBpp0306032	0.08	0	0.16
P7	3L	1423067	AG	A	CG9173	-1	.	.	.	.	.	295-295-delfrshift	.	delfrshift	FBpp0072604	0.133	0	0.266
P7	3L	3170136	AC	A	CG32281	1	.	.	.	.	.	636-636-delfrshift	.	delfrshift	FBpp0072898	0.133	1	0.266
P7	3L	5136627	GA	G	CG4611	1	.	.	.	.	.	157-157-delfrshift	.	delfrshift	FBpp0076868	0.211	11.5	0.422
P7	3L	6051594	TGCTG	T	Jon65Aiii	1	.	.	.	.	.	760-763-delfrshift	.	delfrshift	FBpp0076749	0.13	383.9	0.26
P7	3L	6960632	TCG	T	sgl	-1	.	.	.	.	.	983-984-delfrshift	.	delfrshift	FBpp0076647	0.0952	18.9	0.1904
P7	3L	7325411	AT	A	Rint1	1	.	.	.	.	.	1518-1518-delfrshift	.	delfrshift	FBpp0076549	0.136	4.7	0.272
P7	3L	7721019	CGT	C	CG12262	1	.	.	.	.	.	919-920-delfrshift	.	delfrshift	FBpp0076520	0.12	2.4	0.24
P7	3L	8969811	GAGC	G	CG5026	1	.	.	.	.	.	725-727-delinframe	.	delinframe	FBpp0290364	0.105	0.6	0.21
P7	3L	9633099	CCCGAGAACTGAGCAAAT	C	fry	-1	.	.	.	.	.	9686-9702-delfrshift	.	delfrshift	FBpp0297352	0.08	1.2	0.16
P7	3L	9669425	CT	C	fry	-1	.	.	.	.	.	2207-2207-delfrshift	.	delfrshift	FBpp0297352	0.125	1.2	0.25
P7	3L	11121393	T	TC	mRpL2	1	.	.	.	.	.	452-453-insfrshift	.	insfrshift	FBpp0075941	0.12	15.5	0.24
P7	3L	11778805	GA	G	CG14131	1	.	.	.	.	.	704-704-delfrshift	.	delfrshift	FBpp0075760	0.346	1.3	0.692
P7	3L	12125880	GAT	G	Ir68b	-1	.	.	.	.	.	1513-1514-delfrshift	.	delfrshift	FBpp0075758	0.0952	0	0.1904
P7	3L	12535813	A	AT	CG4069	-1	.	.	.	.	.	1229-1230-insfrshift	.	insfrshift	FBpp0075697	0.136	11.5	0.272
P7	3L	15300407	CTT	C	Best4	1	.	.	.	.	.	1157-1158-delfrshift	.	delfrshift	FBpp0112085	0.1	0	0.2
P7	3L	16903546	AT	A	Lmpt	1	.	.	.	.	.	3249-3249-delfrshift	.	delfrshift	FBpp0291926	0.0938	8.2	0.1876
P7	3L	17424914	CTG	C	Sec3	-1	.	.	.	.	.	184-185-delfrshift	.	delfrshift	FBpp0074993	0.13	0	0.26
P7	3L	19464395	C	G	CG14095	-1	G	C	CGT	CCT	V76L	G226C	GTA>CTA	Missense	FBpp0074755	0.267	0	0.534
P7	3L	20208897	GCAC	G	CG6996	1	.	.	.	.	.	1035-1037-delinframe	.	delinframe	FBpp0291861	0.103	0	0.206
P7	3L	21676355	GGC	G	Als2	-1	.	.	.	.	.	2960-2961-delfrshift	.	delfrshift	FBpp0078116	0.115	1.4	0.23
P7	3R	4648038	T	TC	rpk	1	.	.	.	.	.	1606-1607-insfrshift	.	insfrshift	FBpp0293856	0.136	0	0.272
P7	3R	5175316	T	TCG	cno	-1	.	.	.	.	.	4790-4791-insfrshift	.	insfrshift	FBpp0312543	0.148	1.2	0.296
P7	3R	5754643	GACTTT	G	CG2091	-1	.	.	.	.	.	30-34-delfrshift	.	delfrshift	FBpp0078327	0.136	11.4	0.272
P7	3R	5807103	TC	T	CG11000	1	.	.	.	.	.	264-264-delfrshift	.	delfrshift	FBpp0112107	0.15	0.1	0.3
P7	3R	6453617	T	TG	CG9727	-1	.	.	.	.	.	2075-2076-insfrshift	.	insfrshift	FBpp0303226	0.129	0	0.258
P7	3R	8733279	T	C	CG8202	1	T	C	TTG	TCG	L303S	T908C	TTG>TCG	Missense	FBpp0081397	0.111	3.1	0.222
P7	3R	9659299	T	TC	CG9492	-1	.	.	.	.	.	9008-9009-insfrshift	.	insfrshift	FBpp0310725	0.111	0	0.222
P7	3R	11670020	AGT	A	CG42327	1	.	.	.	.	.	2450-2451-delfrshift	.	delfrshift	FBpp0289067	0.118	0.4	0.236
P7	3R	14268385	T	TG	trx	-1	.	.	.	.	.	7936-7937-insfrshift	.	insfrshift	FBpp0082409	0.136	1.2	0.272
P7	3R	16172381	G	T	CG8925	1	G	T	GGG	GTG	R75S	G225T	AGG>AGT	Missense	FBpp0082707	0.174	1.3	0.348
P7	3R	18757666	T	TG	Epg5	-1	.	.	.	.	.	1003-1004-insfrshift	.	insfrshift	FBpp0271890	0.0976	1.6	0.1952
P7	3R	19409678	TG	T	CG11626	1	.	.	.	.	.	294-294-delfrshift	.	delfrshift	FBpp0112159	0.25	0.1	0.5
P7	3R	24013498	CGT	C	KrT95D	-1	.	.	.	.	.	404-405-delfrshift	.	delfrshift	FBpp0083894	0.154	0.9	0.308
P7	3R	24941131	AG	A	ssh	-1	.	.	.	.	.	1879-1879-delfrshift	.	delfrshift	FBpp0084175	0.167	0.9	0.334
P7	3R	25035920	C	A	Ythdf	-1	G	T	CGC	CTC	A299S	G895T	GCC>TCC	Missense	FBpp0306574	0.136	2.8	0.272
P7	3R	25126046	CG	C	Mocs2B	-1	.	.	.	.	.	768-768-delfrshift	.	delfrshift	FBpp0084157	0.0652	0	0.1304
P7	3R	25251466	GA	G	Nup358	1	.	.	.	.	.	1317-1317-delfrshift	.	delfrshift	FBpp0293235	0.158	7.4	0.316
P7	3R	25384046	G	GT	CG31437	1	.	.	.	.	.	258-259-insfrshift	.	insfrshift	FBpp0084209	0.174	0	0.348
P7	3R	25384050	C	A	CG31437	1	C	A	CCA	CAA	P88Q	C263A	CCA>CAA	Missense	FBpp0084209	0.174	0	0.348
P7	3R	27121425	GGTGA	G	CG5882	1	.	.	.	.	.	2437-2440-delfrshift	.	delfrshift	FBpp0084479	0.13	0.2	0.26
P7	3R	30197248	TG	T	CG9743	-1	.	.	.	.	.	771-771-delfrshift	.	delfrshift	FBpp0084937	0.125	315.4	0.25
P7	3R	31052916	GC	G	Chchd3	-1	.	.	.	.	.	518-518-delfrshift	.	delfrshift	FBpp0085107	0.12	103.2	0.24
P7	4	761908	TA	T	bt	1	.	.	.	.	.	17434-17434-delfrshift	.	delfrshift	FBpp0290554	0.2	0	0.4
P7	X	1332067	GGGT	G	CG11409	-1	.	.	.	.	.	1561-1563-delinframe	.	delinframe	FBpp0309598	0.167	0	0.167
P7	X	1355281	T	TGCA	CG11417	1	.	.	.	.	.	1186-1187-insfrshift	.	insfrshift	FBpp0070205	0.182	14.4	0.182
P7	X	2680777	A	G	HLH3B	-1	T	C	GTT	GCT	V262A	T785C	GTT>GCT	Missense	FBpp0070482	0.25	0.1	0.25
P7	X	2742696	A	AC	Syx4	-1	.	.	.	.	.	135-136-insfrshift	.	insfrshift	FBpp0070471	0.167	1.2	0.167
P7	X	3515320	GT	G	CG13021	1	.	.	.	.	.	62-62-delfrshift	.	delfrshift	FBpp0070546	0.19	0	0.19
P7	X	4920340	GT	G	CG6903	1	.	.	.	.	.	593-593-delfrshift	.	delfrshift	FBpp0070691	0.2	16	0.2
P7	X	9659269	G	A	CG3106	-1	C	T	CCG	CTG	S721S	C2163T	TCC>TCT	Synonymous	FBpp0071338	0.944	0.2	0.944
P7	X	11157785	T	TG	CG32668	-1	.	.	.	.	.	1631-1632-insfrshift	.	insfrshift	FBpp0073325	0.19	0	0.19
P7	X	11568131	G	GCA	RpII215	-1	.	.	.	.	.	1237-1238-insfrshift	.	insfrshift	FBpp0073387	0.125	6.6	0.125
P7	X	11617257	GCAA	G	Met	1	.	.	.	.	.	391-393-delinframe	.	delinframe	FBpp0073368	0.4	2.3	0.4
P7	X	12692911	C	CA	Smr	-1	.	.	.	.	.	5409-5410-insfrshift	.	insfrshift	FBpp0305909	0.214	0	0.214
P7	X	13306254	GA	G	IP3K2	1	.	.	.	.	.	376-376-delfrshift	.	delfrshift	FBpp0311961	0.148	0	0.148
P7	X	13388607	CG	C	CG1662	1	.	.	.	.	.	597-597-delfrshift	.	delfrshift	FBpp0309558	0.154	6.5	0.154
P7	X	14380906	A	G	betaNACtes4	1	A	G	GAC	GGC	T134A	A400G	ACA>GCA	Missense	FBpp0073732	0.3	0	0.3
P7	X	14907279	T	TG	fiz	-1	.	.	.	.	.	1333-1334-insfrshift	.	insfrshift	FBpp0310035	0.167	0.2	0.167
P7	X	15750218	AT	A	Mvd	1	.	.	.	.	.	451-451-delfrshift	.	delfrshift	FBpp0312007	0.158	1.5	0.158
P7	X	15927553	GAA	G	Lcch3	1	.	.	.	.	.	763-764-delfrshift	.	delfrshift	FBpp0089263	0.143	0.7	0.143
P7	X	16413219	A	AT	CG4301	1	.	.	.	.	.	3077-3078-insfrshift	.	insfrshift	FBpp0074048	0.188	0.8	0.188
P7	X	17590708	TC	T	CG12992	1	.	.	.	.	.	460-460-delfrshift	.	delfrshift	FBpp0307239	0.167	0	0.167
P7	X	18445663	C	A	CG32547	-1	G	T	AGC	ATC	E534D	G1602T	GAG>GAT	Missense	FBpp0304652	0.231	0.1	0.231
P7	X	19237159	G	GGC	CG14196	-1	.	.	.	.	.	1012-1013-insfrshift	.	insfrshift	FBpp0074460	0.222	0.7	0.222
P7	X	19594995	T	G	CG14205	1	T	G	TTT	TGT	L604L	T1812G	CTT>CTG	Synonymous	FBpp0074499	0.25	0.2	0.25
P7	X	19861359	C	A	THADA	-1	G	T	TGG	TTG	V1244V	G3732T	GTG>GTT	Synonymous	FBpp0288416	0.211	0.5	0.211
P9	2L	2211491	GT	G	CG15385	-1	.	.	.	.	.	576-576-delfrshift	.	delfrshift	FBpp0077517	0.0714	0.2	0.1428
P9	2L	10988093	A	AG	CG12253	1	.	.	.	.	.	258-259-insfrshift	.	insfrshift	FBpp0079738	0.0943	2.6	0.1886
P9	2L	11123469	AT	A	Csl4	-1	.	.	.	.	.	1-1-delfrshift	.	delfrshift	FBpp0079813	0.0816	22.8	0.1632
P9	2L	13832442	TG	T	DNApol-gamma35	-1	.	.	.	.	.	186-186-delfrshift	.	delfrshift	FBpp0099758	0.0714	0	0.1428
P9	2L	16768759	GA	G	Mhc	1	.	.	.	.	.	80-80-delfrshift	.	delfrshift	FBpp0080453	0.0889	0	0.1778
P9	2L	21286406	CT	C	Mondo	-1	.	.	.	.	.	3245-3245-delfrshift	.	delfrshift	FBpp0081052	0.138	1	0.276
P9	2L	22213349	G	A	Ir40a	-1	C	T	CCT	CTT	L265L	C793T	CTA>TTA	Synonymous	FBpp0307914	0.407	0.1	0.814
P9	2R	8090115	CT	C	sut3	1	.	.	.	.	.	529-529-delfrshift	.	delfrshift	FBpp0087857	0.0909	0	0.1818
P9	2R	16360746	C	T	CG6262	1	C	T	TCA	TTA	I246I	C738T	ATC>ATT	Synonymous	FBpp0086296	0.422	0	0.844
P9	2R	17075756	AGCT	A	CG30460	-1	.	.	.	.	.	299-301-delinframe	.	delinframe	FBpp0086161	0.0645	0.9	0.129
P9	3L	4483098	TC	T	CG11350	1	.	.	.	.	.	191-191-delfrshift	.	delfrshift	FBpp0303816	0.0625	0	0.125
P9	3L	5804899	CA	C	CG42272	1	.	.	.	.	.	1072-1072-delfrshift	.	delfrshift	FBpp0288891	0.0725	0.1	0.145
P9	3L	6131960	TTA	T	Cpr65Au	-1	.	.	.	.	.	120-121-delfrshift	.	delfrshift	FBpp0311912	0.0652	0	0.1304
P9	3L	8805389	TC	T	CG34427	1	.	.	.	.	.	494-494-delfrshift	.	delfrshift	FBpp0292323	0.0612	0	0.1224
P9	3R	4935316	CCT	C	Cdep	1	.	.	.	.	.	10064-10065-delfrshift	.	delfrshift	FBpp0307781	0.0727	0	0.1454
P9	3R	16267242	T	TGA	Mst89B	1	.	.	.	.	.	86-87-insfrshift	.	insfrshift	FBpp0082714	0.0517	0.1	0.1034
P9	3R	18174892	A	AC	wrd	1	.	.	.	.	.	1258-1259-insfrshift	.	insfrshift	FBpp0082978	0.0612	1	0.1224
P9	3R	19030628	AG	A	Prp18	-1	.	.	.	.	.	565-565-delfrshift	.	delfrshift	FBpp0083131	0.0746	3.8	0.1492
P9	3R	21776567	GT	G	CG6800	1	.	.	.	.	.	378-378-delfrshift	.	delfrshift	FBpp0083530	0.0784	0.2	0.1568
P9	3R	24531390	GT	G	ana1	1	.	.	.	.	.	529-529-delfrshift	.	delfrshift	FBpp0306443	0.0625	0.2	0.125
P9	3R	24923006	AG	A	Mink	1	.	.	.	.	.	372-372-delfrshift	.	delfrshift	FBpp0084092	0.0556	3.8	0.1112
P9	4	1081141	G	GT	Actbeta	-1	.	.	.	.	.	1067-1068-insfrshift	.	insfrshift	FBpp0088273	0.277	0	0.554
P9	X	2249562	AT	A	crn	-1	.	.	.	.	.	243-243-delfrshift	.	delfrshift	FBpp0070402	0.111	6.8	0.111
P9	X	2596577	AG	A	egh	1	.	.	.	.	.	364-364-delfrshift	.	delfrshift	FBpp0309090	0.075	8.7	0.075
P9	X	18439935	AC	A	CG43841	1	.	.	.	.	.	190-190-delfrshift	.	delfrshift	FBpp0304671	0.154	0	0.154
P9	X	19246147	CG	C	CG7992	-1	.	.	.	.	.	567-567-delfrshift	.	delfrshift	FBpp0074459	0.12	12.3	0.12
